# Supplementary material for: The mechanistic basis of genetic assimilation in natural fly populations
Source: Research Square preprint supplement (doi:10.21203/rs.3.rs-4258726/v1), 2024-05-10
Supplement: Supplementary file 1 [file 478618203eee0aa7093034f2.xlsx]

## Sheet: Ext. Data Table 3
Table 3 | TE insertion analysis. A. Number of TE insertions detected in each population, supported by PoPoolationTE2 and TEMP2. Number of de novo TE insertions. We consider an insertion as de novo if a TE is present in a particular region only in an assimilated (A) or non-assimilated line (N), and not present in the control nor parental population lines. For example, a de novo insertion in D907_A…
A. Total number of insertions detected
Line	Population		Number of TE insertions detected by TEMP2 and PoPoolationTE2	Number of de novo insertions (with TEMP2 freq. > 0.5)	Significant frequency change of TE insertions
D907	D907_P0	Parental	1284
	D907_C	Control	1237
	D907_A	Assimilated	1097	247 (0)	142
	D907_N	Non-assimilated	1109	216 (5)	155
Mix	Mix_P0	Parental	2172
	Mix_C	Control	2004
	Mix_A	Assimilated	1528	221 (0)	726
	Mix_N	Non-assimilated	1391	226 (2)	647
Mix2	Mix2_P0	Parental	1681
	Mix2_C	Control	1542
	Mix2_A	Assimilated	1142	171 (0)	557
	Mix2_N	Non-assimilated	1048	133 (0)	463
B. Annotation of de novo TE insertions with high frequency (>0.5, frequency from TEMP2)
Chromosome	Start	End	TE consensus name	Population line	Frequency (TEMP2)	Gene intersect
X	20036788	20036965	con33_17-6	D907_N	1	Intron of Dop2R (dopamine receptor)
2L	7440498	7440503	con48_roo	D907_N	0.910448	Intron of CG5973
2R	9348721	9348730	con41_UnFmcl001_RLX-incomp	D907_N	0.764706	Intron of CG13954 / Exon of Or45a (odorant receptor)
2L	7984735	7984754	con41_UnFmcl001_RLX-incomp	D907_N	0.642857	Exon of CG7231
2R	13000707	13000713	con48_roo	D907_N	0.543478	Intron of Suz2
3L	14779683	14779690	con41_UnFmcl001_RLX-incomp	Mix_N	0.531646	Intron of bmm
X	19298772	19298780	con33_P-element	Mix_N	1	Non-coding region near CG genes
C. TEs with significant change in frequency associated with DEG (within 1kb) - for Mix in both replicates
Line	TE	FlyBase ID	Gene symbol	FlyBase Gene Summary	Chromosome	Start	End
D907_A, Mix_A, Mix_N, Mix2_A, Mix2_N	con23_copia	FBgn0053329	Sp212	Predicted to enable serine-type endopeptidase activity. Involved in response to bacterium and response to fungus.	3R	14225112	14225292
D907_A, D907_N, Mix_A, Mix_N, Mix2_A, Mix2_N	con26_I-element	FBgn0022800	Cad96Ca	Cadherin 96Ca (Cad96Ca) encodes a receptor tyrosine kinase (RTK) that is a direct target of the transcription factor encoded by grh and is required for epidermal wound healing. It cooperates with the product of InR during wing growth.	3R	25197656	25197674
Mix_A, Mix2_A	con15_flea	FBgn0037836	CG14692	Is expressed in spermatozoon.	3R	10804108	10804123
Mix2_A, Mix2_N, Mix_A, Mix_N	con20_jockey	FBgn0039848	Loxl1	Lysyl oxidase-like 1 (Loxl1) encodes a protein-lysine 6-oxidase that might be involved in euchromatinization and gene regulation.	3R	31458060	31458088
Mix_N, Mix2_N	con12_Doc	FBgn0036834	CG6836	Probable transporter.	3L	18951726	18951741
	con48_roo	FBgn0039167	CG17786	NA	3R	24216087	24216093
	con20_jockey	FBgn0014141	cher	Cheerio (cher) encodes a dimeric F-actin crosslinking protein of the filamin protein family. It functions to organize the F-actin cytoskeleton in multiple contexts including ovarian germline ring canals, migrating somatic cells, and neuronal growth cones.	3R	17108985	17109015
	con17_Max-element	FBgn0002719	Men	Malic enzyme (Men) encodes a dehydrogenase that catalyzes the oxidation of malate to pyruvate, with the concomitant reduction of NADP[+] to NADPH.	3R	12720512	12720545
	con23_copia	FBgn0027563	CG9631	Predicted to enable serine-type endopeptidase activity. Predicted to be involved in proteolysis.	3R	14225112	14225292
	con25_opus	FBgn0034972	CG10339	Predicted to enable neurexin family protein binding activity and signaling receptor activity. Predicted to be involved in several processes, including neuron cell-cell adhesion; synapse assembly; and synaptic vesicle endocytosis. Predicted to be active in cell surface and postsynaptic membrane.	2R	24080904	24080916
	con43_H	FBgn0000024	Ace	Acetylcholine esterase (Ace) encodes an enzyme that catalyzes the hydrolysis of the neurotransmitter acetylcholine to acetate and choline, thus resetting the neurotransmission mechanism at neuromuscular junctions.	3R	13225534	13225557
	con48_roo	FBgn0270928	VAChT	Vesicular acetylcholine transporter (VAChT) encodes a vesicular transport protein necessary for packaging the neurotransmitter acetylcholine into synaptic vesicles.	3R	18706326	18706342
D. Frequency information of TE insertions
Population line	TE	Chromosome	Start	End	Frequency_P0	Frequency_C	Frequency_A	Frequency_N	Type	FoldChange	PvalueFisher	p.adj_A-N	p.adj_A-C	p.adj_A-P0	p.adj_N-C	p.adj_N-P0	p.adj_C-P0
D907_A	con20_jockey	3R	14986200	14986257	0.27957	0.0693069	1	0.461078	P0-C-A-N	4.42633	1.57e-52	7.72e-17	7.14e-51	1.06e-27	3.5e-15	0.00298	4.91e-07
D907_A	con15_Rt1b	3R	14946381	14946428	0.321212	0.0746269	1	0.546099	P0-C-A-N	3.75275	1.13e-50	1.82e-12	5.09e-49	2.12e-23	1.02e-17	0.00143	4.12e-08
D907_A	con20_jockey	3R	14608701	14608744	0.377049	0.162791	1	0.463415	P0-C-A-N	3.90748	4.93e-41	1.29e-15	5.86e-41	2.65e-22	5.46e-07	0.263	2.57e-05
D907_A	con11_hopper	3R	14991726	14991740	0.265823	0.0744681	1	0.469027	P0-C-A-N	4.83673	4.92e-40	1.76e-11	6.96e-39	4.89e-21	2.74e-12	0.00463	1.05e-05
D907_A	con25_opus	3R	14206198	14206221	0.370079	0.131579	1	0.59633	P0-C-A-N	3.64118	7.47e-39	1.45e-08	2.53e-37	2.95e-16	1.59e-13	0.00689	6.85e-06
D907_A	con41_UnFmcl001_RLX-incomp	2R	7014533	7014544	0.0315789	0.0595238	0.0761421	0.775	P0-C-A-N	0.594681	3.78e-36	5.08e-23	0.668	0.102	2.99e-23	2.6e-28	0.355
D907_A	con43_H	3R	13525725	13525746	0.363636	0.195266	1	0.527473	P0-C-A-N	4.77956	1.31e-33	7.7e-14	6.06e-32	1.18e-22	4.07e-08	0.00786	0.00221
D907_A	con43_H	3R	13225534	13225557	0.569444	0.190751	1	0.631902	P0-C-A-N	2.13695	4.62e-33	5.52e-10	4.16e-33	1.16e-11	6.36e-12	0.459	3.31e-09
D907_A	con12_Doc	3R	11449231	11449265	0.364706	0.231638	1	0.280488	P0-C-A-N	5.77421	6.67e-33	5.7e-25	8.28e-29	1.47e-20	0.404	0.214	0.0341
D907_A	con48_roo	3R	13917618	13917623	0.310811	0.101449	1	0.522124	P0-C-A-N	4.29185	4.08e-32	4.32e-08	1.52e-30	5.79e-15	1.3e-12	0.0045	9.02e-06
D907_A	con11_hopper	3R	13437020	13437225	0.284672	0.10101	1	0.46988	P0-C-A-N	4.89481	4.26e-32	5.9e-09	1.23e-31	1.23e-16	5.96e-09	0.0205	0.000107
D907_A	con14_F-element	3R	11471277	11471479	0.529412	0.239264	1	0.348837	P0-C-A-N	2.62189	1.04e-31	1.08e-22	4.84e-29	4.1e-13	0.0572	0.0109	1.94e-05
D907_A	con20_jockey	3R	10203674	10203696	0.364865	0.251613	1	0.222222	P0-C-A-N	6.60816	7.14e-31	1.12e-25	9e-25	1.99e-18	0.651	0.03	0.0791
D907_A	con16_blood	3R	11131463	11131486	0.298246	0.181208	1	0.189189	P0-C-A-N	6.99595	3.22e-30	7.95e-25	3.88e-25	3.18e-17	1	0.0906	0.078
D907_A	con26_Tirant	3R	10139277	10139295	0.28169	0.252874	1	0.25	P0-C-A-N	25.9275	2.75e-28	2.9e-23	2.9e-23	1.6e-20	1	0.8	0.8
D907_A	con26_BS	3R	10089592	10089608	0.376623	0.2875	1	0.367232	P0-C-A-N	7.99457	3.42e-28	5.64e-21	1.62e-24	1.05e-19	0.22	0.895	0.22
D907_A	con48_roo	3R	13992835	13992847	0.229358	0.147287	1	0.690476	P0-C-A-N	10.3899	1.16e-27	0.000185	5.91e-22	1.06e-16	1.66e-11	1.67e-07	0.149
D907_A	con48_roo	3R	11181653	11181671	0.258065	0.173469	1	0.268293	P0-C-A-N	9.77033	1.25e-27	1.87e-19	3.09e-26	1.69e-20	0.0902	0.892	0.0902
D907_A	con25_opus	3R	22228645	22228656	0.302632	0.202381	1	0.6	P0-C-A-N	7.95622	1.19e-26	3.5e-07	8.46e-24	6.69e-18	5.72e-08	0.000108	0.0831
D907_A	con42_mdg1	3R	13852483	13852504	0.28972	0.0862944	1	0.460674	P0-C-A-N	4.4916	2.45e-26	3.15e-07	3.56e-25	1.86e-11	1.08e-09	0.0392	5.95e-05
D907_A	con45_Tabor	3R	10668525	10668557	0.422222	0.28125	1	0.234568	P0-C-A-N	5.09853	4.09e-26	6.18e-24	9.27e-20	5.54e-14	0.451	0.0062	0.0604
D907_A	con14_F-element	3R	10731193	10731216	0.389831	0.268657	1	0.245902	P0-C-A-N	6.03548	1.05e-25	3.48e-21	5.1e-21	5.96e-15	0.75	0.0598	0.107
D907_A	con24_X-element	3R	13621173	13621197	0.504	0.221477	1	0.669565	P0-C-A-N	2.75561	3.47e-25	7.83e-07	1.08e-24	2.95e-11	2.74e-09	0.0481	4.22e-05
D907_A	con33_17-6	3R	20844904	20845111	0.211679	0.526316	1	1	P0-C-A-N	1.50549	4.4e-25	1	2.66e-07	2.3e-17	1.23e-06	7.44e-16	1.72e-05
D907_A	con48_roo	3R	10126561	10126597	0.386139	0.271523	1	0.288889	P0-C-A-N	6.35581	3.63e-24	1.27e-19	5.83e-21	5.32e-14	0.881	0.241	0.174
D907_A	con20_jockey	3R	25570689	25570714	0.486486	0.54	1	1	P0-C-A-N	8.59588	3.89e-24	1	2.42e-11	1.22e-14	2.46e-10	4.5e-13	0.636
D907_A	con17_Max-element	3R	11142246	11142269	0.493506	0.351724	1	0.354839	P0-C-A-N	4.57234	1.12e-23	5.87e-20	6.09e-20	3.54e-14	1	0.0595	0.0595
D907_A	con22_S-element	3L	1969463	1969650	0.226415	1	0.2	0.253333	P0-C-A-N	-1.03415	1.65e-23	0.613	6.72e-19	0.741	1.73e-18	0.741	7.5e-18
D907_A	con45_Tabor	3R	11412387	11412394	0.392265	0.307692	1	0.367521	P0-C-A-N	8.18592	4.26e-23	1.18e-16	1.31e-19	1.36e-17	0.524	0.774	0.31
D907_A	con26_I-element	3R	19514527	19514557	0.426752	0.472868	1	1	P0-C-A-N	11.4306	1.78e-22	1	3.72e-11	6.18e-13	1.2e-10	1.2e-12	0.68
D907_A	con25_opus	3R	21011479	21011500	0.463768	0.619048	1	1	P0-C-A-N	2.45332	1.81e-22	1	8.84e-10	2.78e-15	5.37e-08	1.37e-12	0.0569
D907_A	con26_BS	3R	28187896	28187912	0.467532	0.590164	1	1	P0-C-A-N	3.342	2.42e-22	1	1.52e-08	4.53e-13	1.08e-09	2.59e-14	0.163
D907_A	con48_roo	3R	23403952	23403979	0.43662	0.586957	1	1	P0-C-A-N	2.74745	2.62e-22	1	2.58e-08	6.21e-14	3.08e-08	6.21e-14	0.0916
D907_A	con46_297	3R	9852021	9852050	0.305085	0.26	1	0.225225	P0-C-A-N	16.4134	4.82e-22	1.63e-18	1.48e-16	1.13e-15	0.72	0.363	0.72
D907_A	con43_H	3R	25539321	25539374	0.554286	0.594203	1	1	P0-C-A-N	10.166	2.41e-21	1	8.8e-11	1.46e-12	5.2e-10	1.34e-11	0.799
D907_A	con25_opus	X	17623656	17623660	0.0813397	0.194631	0.134021	0.616667	P0-C-A-N	-0.534993	4.21e-21	5.07e-14	0.202	0.152	4.16e-09	4.03e-19	0.00597
D907_A	con12_Doc	3R	20490055	20490084	0.518519	0.616667	1	1	P0-C-A-N	3.90566	2.88e-20	1	8.84e-09	3.36e-12	1.35e-08	3.36e-12	0.274
D907_A	con14_F-element	3R	27891265	27891285	0.482993	0.782178	1	1	P0-C-A-N	0.728051	1.05e-19	1	0.000138	8.04e-14	0.000311	3.84e-12	0.000311
D907_A	con14_F-element	3R	20430658	20430674	0.526316	0.712	1	1	P0-C-A-N	1.55102	1.31e-19	1	9.44e-07	1.05e-12	9.44e-07	1.05e-12	0.0222
D907_A	con16_blood	3R	28118803	28118831	0.392	0.530612	1	1	P0-C-A-N	3.38634	2.16e-19	1	6.48e-08	2.66e-12	7.41e-08	1.26e-11	0.126
D907_A	con48_roo	3R	11039697	11039717	0.283582	0.25	1	0.272727	P0-C-A-N	22.3334	2.49e-19	8.04e-16	8.04e-16	8.04e-16	0.878	0.878	0.878
D907_A	con48_roo	3R	24835119	24835131	0.40625	0.518519	1	1	P0-C-A-N	4.28864	3.33e-19	1	2.22e-08	7.11e-12	2.22e-08	7.11e-12	0.192
D907_A	con42_mdg1	3R	29657934	29657949	0.513889	0.623188	1	1	P0-C-A-N	3.44753	3.37e-19	1	1.21e-08	1.34e-11	2.31e-08	4.02e-11	0.21
D907_A	con14_F-element	3R	23596951	23597148	0.562914	0.520661	1	1	P0-C-A-N	11.3445	4.72e-19	1	2.74e-11	6.54e-11	2.98e-09	7.3e-09	0.778
D907_A	con14_F-element	3R	21603646	21603665	0.532847	0.736434	1	1	P0-C-A-N	1.29461	5.43e-19	1	2.04e-06	1.6e-12	2.04e-06	1.6e-12	0.0109
D907_A	con8_micropia	3R	20953808	20953830	0.531034	0.637931	1	1	P0-C-A-N	3.38708	5.44e-19	1	1.98e-08	4.77e-12	1.04e-07	4.89e-11	0.248
D907_A	con48_roo	3R	26367396	26367406	0.439394	0.595238	1	1	P0-C-A-N	2.59723	6.36e-19	1	2.76e-07	1.76e-12	9.76e-07	1.9e-11	0.109
D907_A	con48_roo	3R	19248241	19248259	0.454545	0.548872	1	1	P0-C-A-N	4.7826	8.4e-19	1	5.66e-08	5.01e-10	1.77e-09	4.69e-12	0.276
D907_A	con20_jockey	3R	20231969	20231990	0.59292	0.564516	1	1	P0-C-A-N	15.3318	2.06e-18	1	7.32e-10	4.44e-09	2.8e-10	1.39e-09	0.893
D907_A	con48_roo	3R	28282421	28282431	0.395833	0.522727	1	1	P0-C-A-N	3.76119	6.11e-18	1	3.46e-07	5.19e-10	1.82e-08	1.13e-11	0.253
D907_A	con48_roo	3R	24216087	24216093	0.468531	0.555556	1	1	P0-C-A-N	5.10708	6.19e-18	1	1.28e-07	1.46e-10	3.36e-08	3.92e-11	0.407
D907_A	con25_opus	3R	12452991	12453011	0.260606	0.030303	0.430464	0.148325	P0-C-A-N	1.73754	6.56e-18	4.96e-07	1.93e-17	0.0107	7.9e-05	0.0158	2.61e-09
D907_A	con14_Rt1a	3R	22871200	22871225	0.492308	0.487179	1	1	P0-C-A-N	99.9846	7.19e-18	1	3.9e-10	3.9e-10	3.75e-09	3.75e-09	1
D907_A	con20_jockey	3R	28662507	28662539	0.281553	0.435294	1	1	P0-C-A-N	3.6731	8.3e-18	1	6.42e-07	1.04e-10	9.82e-08	1.03e-11	0.091
D907_A	con11_hopper	3R	29876982	29877010	0.543624	0.606299	1	1	P0-C-A-N	6.28163	1.29e-17	1	3.12e-09	4.32e-11	1.14e-07	2.38e-09	0.536
D907_A	con48_roo	3R	10990785	10990805	0.241935	0.172932	1	0.230769	P0-C-A-N	11.986	1.73e-17	9.74e-13	2.05e-16	1.75e-13	0.427	1	0.358
D907_A	con41_UnFmcl001_RLX-incomp	3R	21969137	21969147	0.473684	0.660377	1	1	P0-C-A-N	1.81915	2.22e-17	1	1.57e-06	3.09e-11	1.57e-06	3.09e-11	0.034
D907_A	con46_297	3R	17954264	17954282	0.488	0.517857	1	1	P0-C-A-N	16.1484	2.76e-17	1	1.21e-08	2.03e-09	3.1e-09	7.2e-10	0.901
D907_A	con43_H	3R	24395439	24395465	0.568345	0.54	1	1	P0-C-A-N	16.2286	6.76e-17	1	3.48e-09	3.48e-09	3.48e-09	3.48e-09	0.893
D907_A	con25_1360	2R	8086915	8087172	1	1	0.162162	1	P0-C-A-N	NA	1.7e-16	1.32e-07	1.4e-08	1.47e-09	1	1	1
D907_A	con25_opus	3R	12021460	12021468	0.552941	0.326733	1	0.380952	P0-C-A-N	2.97632	2.24e-16	2.76e-12	9e-15	5.46e-08	0.591	0.11	0.0195
D907_A	con23_copia	3R	14225112	14225292	0.309353	0.15	1	0.394495	P0-C-A-N	5.33407	2.77e-16	1.59e-08	1.31e-16	5.58e-11	0.000333	0.277	0.0101
D907_A	con41_UnFmcl001_RLX-incomp	3R	31231242	31231271	0.403846	0.6875	1	1	P0-C-A-N	1.10169	2.87e-16	1	8.04e-05	6.87e-11	8.04e-05	6.87e-11	0.00176
D907_A	con26_I-element	3R	28075391	28075413	0.552	0.565217	1	1	P0-C-A-N	32.8957	5.24e-16	1	3.72e-08	5.82e-09	3.32e-08	5.82e-09	1
D907_A	con42_mdg1	3R	31157395	31157412	0.527027	0.548387	1	1	P0-C-A-N	21.1429	6.08e-16	1	1.28e-08	1.99e-09	8.04e-08	1.31e-08	1
D907_A	con42_mdg1	3R	24260536	24260573	0.57377	0.588235	1	1	P0-C-A-N	28.4663	9.95e-16	1	2.04e-08	8.16e-09	5.49e-08	1.95e-08	1
D907_A	con48_roo	3R	22258639	22258652	0.478992	0.613636	1	1	P0-C-A-N	2.86952	1.72e-15	1	1.34e-06	3.88e-10	7.86e-06	3.24e-09	0.197
D907_A	con21_springer	3R	20944815	20945087	0.154762	0.104294	1	0.246575	P0-C-A-N	17.748	2.82e-15	2.02e-09	6.42e-15	8.76e-13	0.00466	0.105	0.226
D907_A	con11_hopper	3R	25416945	25416964	0.548387	0.593496	1	1	P0-C-A-N	9.01159	2.89e-15	1	3.14e-07	3.4e-08	3.4e-08	4.57e-09	0.756
D907_A	con48_roo	3R	22260278	22260288	0.47619	0.436893	1	1	P0-C-A-N	14.3295	4.1e-15	1	1.06e-08	1.1e-07	1.06e-08	1.1e-07	0.868
D907_A	con13_diver	3R	12134452	12134469	0.345455	0.121212	1	0.375	P0-C-A-N	3.91891	5.5e-15	8.14e-07	2.18e-15	9.96e-08	0.000261	0.726	0.000355
D907_A	con11_hopper	3R	20409643	20409686	0.704348	0.536	1	1	P0-C-A-N	2.7562	8.16e-15	1	6.81e-09	4.7e-05	4.12e-10	5.46e-06	0.0515
D907_A	con12_Doc	3R	19220478	19220496	0.625	0.672727	1	1	P0-C-A-N	6.85719	1.37e-14	1	4.76e-07	1.71e-08	5.72e-07	1.71e-08	0.734
D907_A	con15_pogo	2R	18193268	18193575	0.038961	0.0617284	0.724138	0.0285714	P0-C-A-N	29.0947	1.98e-14	1.67e-11	5.7e-09	9.57e-10	0.69	0.714	0.714
D907_A	con26_Tirant	3R	28619940	28619988	0.462185	0.478261	1	1	P0-C-A-N	32.4545	2.22e-14	1	1.16e-07	3.63e-08	1.17e-07	3.63e-08	1
D907_A	con26_I-element	3R	22771171	22771208	0.417476	0.549296	1	1	P0-C-A-N	3.41909	6.61e-14	1	3.98e-06	5.93e-09	1.88e-05	3.45e-08	0.233
D907_A	con48_roo	3L	1215557	1215571	0.421053	0.342466	0.862069	0.24	P0-C-A-N	6.61182	7.36e-14	9.3e-14	1.31e-09	1.58e-06	0.132	0.0144	0.294
D907_A	con26_I-element	3R	25197656	25197674	0.494949	0.656566	1	1	P0-C-A-N	2.12499	1.18e-13	1	1.31e-05	7.5e-09	1.86e-05	1.94e-08	0.088
D907_A	con48_roo	3R	18706326	18706342	0.370787	0.486486	1	1	P0-C-A-N	4.43836	1.3e-13	1	4.28e-06	2.13e-08	4.28e-06	2.8e-08	0.308
D907_A	con48_roo	3R	29612811	29612817	0.488889	0.486239	1	1	P0-C-A-N	193.872	1.53e-13	1	2.26e-07	2.26e-07	2.02e-07	2.26e-07	1
D907_A	con46_297	X	10311138	10311343	1	1	1	0.624242	P0-C-A-N	NA	3.16e-13	1.35e-06	1	1	6.18e-07	1.35e-06	1
D907_A	con20_jockey	3R	26253577	26253795	0.432432	0.431579	0.939394	1	P0-C-A-N	595.328	4.04e-13	0.604	2.56e-07	8.68e-07	2.49e-07	2.56e-07	1
D907_A	con20_jockey	3R	19939149	19939173	0.373913	0.604396	1	0.966667	P0-C-A-N	1.71641	4.31e-13	1	0.000366	2.63e-08	0.000202	3.99e-09	0.0127
D907_A	con20_jockey	3R	24566220	24566242	0.747126	0.603774	1	1	P0-C-A-N	2.76401	5.87e-13	1	4.17e-08	8.26e-05	3.3e-08	6.7e-05	0.14
D907_A	con26_Tirant	3R	24203872	24203888	0.647059	0.653061	1	1	P0-C-A-N	57.8039	6.58e-13	1	5.22e-07	5.22e-07	1.02e-06	8.28e-07	1
D907_A	con48_roo	2L	5490186	5490391	0.671233	0.661017	0.29927	1	P0-C-A-N	-35.4098	1.64e-12	1.66e-11	0.00028	6.78e-05	0.00143	0.00143	1
D907_A	con25_opus	3R	27196624	27196774	0.513514	0.688889	1	1	P0-C-A-N	1.77398	4.55e-12	1	0.00017	9.27e-08	0.000155	6.24e-08	0.0829
D907_A	con24_Transpac	3R	29473056	29473149	0.521739	0.649485	1	1	P0-C-A-N	2.74384	2.15e-11	1	2.5e-05	4.16e-07	5.01e-05	9.96e-07	0.23
D907_A	con41_UnFmcl001_RLX-incomp	3R	7113601	7113624	0.758242	0.971429	0.391304	0.553191	P0-C-A-N	-2.7212	2.58e-11	0.0546	1.72e-10	2.9e-05	8.19e-06	0.0343	0.00887
D907_A	con13_UnFmcl013_RLX-incomp	3R	8115342	8115547	0.72973	0.80198	0.321637	0.629032	P0-C-A-N	-6.64835	3.75e-11	4.04e-05	2.65e-09	1.5e-07	0.0536	0.256	0.395
D907_A	con20_jockey	3R	18962610	18962694	0.483146	0.541284	1	0.907692	P0-C-A-N	7.89012	5.19e-11	0.133	4.32e-07	1.4e-07	0.000148	3.5e-05	0.597
D907_A	con41_UnFmcl001_RLX-incomp	3L	11141041	11141058	0.41844	0.454545	1	0.282051	P0-C-A-N	15.1075	5.92e-11	2.53e-11	1.03e-06	3.9e-08	0.0772	0.0794	0.734
D907_A	con20_jockey	3R	30898783	30898808	0.608247	0.636364	1	1	P0-C-A-N	12.933	1.53e-10	1	6.45e-06	2.24e-06	3.24e-05	1.2e-05	1
D907_A	con15_Rt1b	2R	14712005	14712210	1	0.280702	0.358209	0.304965	P0-C-A-N	0.107754	2.06e-10	0.553	0.413	1.22e-08	0.754	6.81e-10	6.81e-10
D907_A	con48_roo	X	17327391	17327411	0.484848	1	1	1	P0-C-A-N	0	1.63e-09	1	1	1.7e-05	1	0.000168	0.000256
D907_A	con9_Bari1	3L	16364073	16364102	0.170306	0.0531401	0.282609	0.279503	P0-C-A-N	1.9585	2.38e-09	1	4.54e-08	0.0267	6.99e-08	0.0337	0.000462
D907_A	con22_S-element	3L	10897761	10897995	1	0.642384	1	1	P0-C-A-N	1	3.64e-09	1	0.000191	1	0.000191	1	5.58e-05
D907_A	con17_Max-element	3R	9003775	9003792	0.138122	0.097561	0.38	0.19797	P0-C-A-N	6.96331	4.97e-09	0.00087	6.78e-08	5.16e-06	0.0255	0.217	0.294
D907_A	con8_G2	3R	6915264	6915305	0.791045	0.875	0.442177	0.764706	P0-C-A-N	-5.15542	5.05e-09	2.78e-05	1.17e-07	7.17e-06	0.186	0.846	0.304
D907_A	con23_copia	3R	9136294	9136307	0.755556	0.873684	0.375	0.72973	P0-C-A-N	-4.22156	7.54e-09	4.2e-05	3.31e-08	4.2e-05	0.099	0.833	0.161
D907_A	con13_UnFmcl013_RLX-incomp	X	16990449	16990480	0.365079	0.557377	0.528455	0.171429	P0-C-A-N	-0.150402	8.93e-09	5.85e-07	0.752	0.0397	1.09e-07	0.0035	0.0208
D907_A	con14_F-element	3R	8594574	8594597	0.645161	0.8	0.376344	0.672131	P0-C-A-N	-2.73611	3.8e-08	0.000132	2.9e-07	0.000342	0.139	0.863	0.0834
D907_A	con20_Burdock	3R	7492582	7492586	0.757009	0.934783	0.454545	0.685185	P0-C-A-N	-2.7014	8.34e-08	0.0144	5.32e-08	0.00116	0.00292	0.428	0.02
D907_A	con20_jockey	3L	7425874	7426063	1	1	0.621622	1	P0-C-A-N	NA	8.41e-08	0.000112	0.000112	0.000112	1	1	1
D907_A	con20_jockey	3R	8688905	8688936	0.111111	0.0614035	0.273632	0.125749	P0-C-A-N	4.26955	1.29e-07	0.0032	1.22e-07	0.000507	0.0612	0.732	0.122
D907_A	con12_Doc	3R	7665642	7665673	0.131579	0.0333333	0.277311	0.129412	P0-C-A-N	2.48334	2.24e-07	0.00774	6.18e-08	0.00894	0.00484	1	0.00484
D907_A	con48_roo	X	7807625	7807652	0.258065	0.311475	0.0645161	0.148649	P0-C-A-N	-4.62383	2.78e-07	0.0327	1.49e-06	5.28e-05	0.0114	0.0558	0.428
D907_A	con20_jockey	3R	26655484	26655690	0.430657	0.582609	0.245283	0.287234	P0-C-A-N	-2.21995	7.25e-07	0.445	4.06e-06	0.0043	7.56e-05	0.0441	0.0766
D907_A	con15_pogo	3L	7842573	7842871	0.323308	0.480916	0.152542	0.494737	P0-C-A-N	-2.08349	9.16e-07	1.05e-05	9.3e-06	0.0101	1	0.0444	0.0444
D907_A	con26_BS	3L	14396759	14397034	0.407407	0.0956522	0.526316	0.405405	P0-C-A-N	1.38142	1.02e-06	0.622	1.54e-05	0.649	0.000855	1	0.00212
D907_A	con33_P-element	3R	7102752	7103076	0.47541	0.684211	0.20339	0.428571	P0-C-A-N	-2.30277	2.24e-06	0.0145	1.85e-06	0.00615	0.058	0.828	0.121
D907_A	con42_mdg1	3R	27882834	27882845	0.702703	0.74026	1	1	P0-C-A-N	6.91589	2.42e-06	1	0.00217	0.00182	0.00217	0.00127	0.976
D907_A	con15_pogo	X	6213343	6213646	0.327731	0.287671	0.804878	0.274725	P0-C-A-N	NA	3.69e-06	1.38e-05	3.7e-05	NA	1	NA	NA
D907_A	con48_roo	3L	2323127	2323181	1	1	0.307692	0.466667	P0-C-A-N	NA	4.93e-06	0.266	0.000738	0.000331	0.0139	0.00812	1
D907_A	con48_roo	3L	16555121	16555133	0.55102	0.840909	0.421053	0.5	P0-C-A-N	-1.44833	1.17e-05	0.494	1.69e-05	0.202	0.000453	0.604	0.00336
D907_A	con41_UnFmcl001_RLX-incomp	3R	7491814	7491840	0.0652174	0.0555556	0.216374	0.134146	P0-C-A-N	16.6448	2.23e-05	0.104	0.000161	0.000396	0.0398	0.0861	0.822
D907_A	con19_Quasimodo	3R	9300328	9300331	0.82906	0.877551	0.539683	0.731092	P0-C-A-N	-6.96764	4.16e-05	0.0356	0.000169	0.000855	0.102	0.253	0.603
D907_A	con26_BS	3R	9285674	9285696	0.333333	0.666667	0.204301	0.45	P0-C-A-N	-1.3871	5.33e-05	0.00897	5.9e-05	0.146	0.113	0.253	0.00936
D907_A	con24_Transpac	3R	8929308	8929335	0.714286	0.806452	0.445378	0.734694	P0-C-A-N	-3.91765	5.6e-05	0.00272	0.000192	0.00272	0.593	0.842	0.428
D907_A	con10_3S18	3R	8227417	8227435	0.653846	0.681159	0.37037	0.384615	P0-C-A-N	-11.3788	0.000105	0.869	0.00392	0.00392	0.00393	0.00392	0.869
D907_A	con14_F-element	3R	8928499	8928567	0.102041	0.0726257	0.224242	0.205128	P0-C-A-N	5.15433	0.000133	0.765	0.0016	0.00982	0.0033	0.0229	0.419
D907_A	con11_hopper	3R	11553415	11553712	0.15847	0.142857	0.312169	0.142857	P0-C-A-N	10.8443	0.000312	0.00462	0.00146	0.00462	1	1	1
D907_A	con15_pogo	3R	9161497	9161687	0.0457516	0.0294118	0.163636	0.0882353	P0-C-A-N	8.21456	0.000372	0.153	0.000888	0.0104	0.0502	0.264	0.563
D907_A	con48_roo	3R	6875942	6876010	0.0930233	0.170732	0.229508	0.0694444	P0-C-A-N	0.756363	0.00113	0.004	0.458	0.0134	0.033	0.525	0.134
D907_A	con25_1360	3R	9106035	9106239	0.0188679	0.0273224	0.109756	0.0416667	P0-C-A-N	9.75026	0.0018	0.0412	0.0102	0.0102	0.684	0.525	0.726
D907_A	con14_F-element	3R	6859539	6859552	0.669291	0.507937	0.4	0.591241	P0-C-A-N	-0.668945	0.00274	0.0366	0.271	0.00277	0.332	0.332	0.105
D907_A	con26_BS	2L	1922500	1922667	0.366337	0.648649	0.590909	0.689655	P0-C-A-N	-0.204525	0.00292	0.65	0.748	0.112	0.812	0.00954	0.00954
D907_A	con48_roo	3R	6897841	6897851	0.136842	0.0833333	0.247525	0.230769	P0-C-A-N	3.0685	0.00732	0.846	0.0165	0.158	0.0261	0.294	0.302
D907_A	con48_roo	3R	6831713	6831722	0.639344	0.412844	0.45	0.541667	P0-C-A-N	0.164044	0.0103	NA	0.749	0.0358	NA	NA	0.0243
D907_A	con25_1360	3R	7492424	7492455	0.52	0.649123	0.393939	0.323944	P0-C-A-N	-1.97629	0.0155	0.535	0.0822	0.44	0.0294	0.163	0.44
D907_A	con25_1360	X	14045751	14045956	0.0272727	0.0106383	0.0686275	0.0280374	P0-C-A-N	NA	0.0709	0.0964	NA	0.0964	NA	1	NA
D907_A	con14_F-element	3R	26649654	26649935	0.436508	0.446281	0.474684	0.562044	P0-C-A-N	2.90627	0.073	0.208	0.726	0.711	0.116	0.116	0.913
D907_A	con14_F-element	3L	6519367	6519387	0.980952	1	0.944954	1	P0-C-A-N	-2.88986	0.0848	0.738	0.654	0.745	1	0.745	0.745
D907_A	con26_Tirant	2R	6605774	6605980	0.210811	0.333333	0.323529	0.289941	P0-C-A-N	-0.0800183	0.112	0.803	1	0.137	0.803	0.266	0.137
D907_A	con20_Burdock	2L	15595922	15595950	0.981481	1	1	0.963303	P0-C-A-N	0	0.146	0.726	1	0.74	0.726	1	0.74
D907_A	con20_jockey	2R	6829602	6829618	1	0.977273	1	1	P0-C-A-N	1	0.199	1	0.936	1	0.936	1	0.936
D907_A	con20_jockey	2L	15778072	15778282	1	1	0.978495	1	P0-C-A-N	NA	0.224	0.994	0.994	0.994	1	1	1
D907_A	con15_flea	2L	13534856	13534880	0.960396	1	1	0.960396	P0-C-A-N	0	0.286	0.69	1	0.69	0.748	1	0.748
D907_A	con33_P-element	3R	8093822	8094010	0.666667	1	1	1	P0-C-A-N	0	0.357	1	1	1	1	1	1
D907_A	con33_P-element	X	6908276	6908476	0.939394	0.923077	1	0.783784	P0-C-A-N	4.71429	0.372	0.756	1	1	0.756	0.756	1
D907_A	con15_flea	3L	1085777	1085852	1	0.909091	0.957447	1	P0-C-A-N	0.531917	0.406	1	1	1	1	1	1
D907_A	con8_G2	3L	16691345	16691533	0.194444	0.22807	0.229358	0.159236	P0-C-A-N	0.0383037	0.495	0.696	1	0.736	0.696	0.736	0.736
D907_A	con25_1360	2L	7872767	7872972	0.0566038	0.0243902	0.0555556	0.0222222	P0-C-A-N	0.967461	0.532	0.692	0.692	1	1	0.692	0.692
D907_A	con15_pogo	X	13752236	13752518	0.273885	0.224138	0.213333	0.280702	P0-C-A-N	-0.217199	0.565	0.648	1	0.648	0.648	1	0.648
D907_A	con2_NOF	X	2766343	2766723	0.545455	0.477612	0.47619	0.435115	P0-C-A-N	-0.0209602	0.581	0.786	1	0.786	0.786	0.786	0.786
D907_A	con13_UnFmcl013_RLX-incomp	3L	11320610	11320704	0.0973451	0.0780142	0.122302	0.123967	P0-C-A-N	2.29104	0.604	1	0.806	0.806	0.806	0.806	0.806
D907_A	con2_NOF	2L	18570318	18570528	0.425	0.348148	0.428571	0.391304	P0-C-A-N	1.04647	0.631	0.792	0.792	1	0.792	0.792	0.792
D907_A	con22_S-element	3L	16973420	16973433	0.925	0.936842	0.972603	0.975309	P0-C-A-N	3.01984	0.65	1	0.948	0.948	0.948	0.948	1
D907_A	con33_P-element	X	15297880	15298039	0.948718	1	1	1	P0-C-A-N	0	0.707	1	1	1	1	1	1
D907_A	BDGP_baggins	3R	8350789	8351026	0.0680272	0.0578512	0.057554	0.0493274	P0-C-A-N	-0.029206	0.865	1	1	1	1	1	1
D907_A	con15_pogo	2L	18729448	18729575	0.435028	0.428571	0.439024	0.451852	P0-C-A-N	1.61886	0.99	1	1	1	1	1	1
D907_A	con10_3S18	2R	11338962	11338975	1	1	1	1	P0-C-A-N	NA	1	1	1	1	1	1	1
D907_A	con10_3S18	2R	20654213	20654230	1	1	1	1	P0-C-A-N	NA	1	1	1	1	1	1	1
D907_A	con10_3S18	3L	1849365	1849375	1	1	1	1	P0-C-A-N	NA	1	1	1	1	1	1	1
D907_A	con10_3S18	3L	2515431	2515446	1	1	1	1	P0-C-A-N	NA	1	1	1	1	1	1	1
D907_A	con10_3S18	3L	3001334	3001346	1	1	1	1	P0-C-A-N	NA	1	1	1	1	1	1	1
D907_A	con10_3S18	3L	6158856	6158866	1	1	1	1	P0-C-A-N	NA	1	1	1	1	1	1	1
D907_A	con10_3S18	X	12631511	12631519	1	1	1	1	P0-C-A-N	NA	1	1	1	1	1	1	1
D907_A	con10_Idefix	2L	1788684	1788713	1	1	1	1	P0-C-A-N	NA	1	1	1	1	1	1	1
D907_A	con11_hopper	2L	2345697	2345709	1	1	1	1	P0-C-A-N	NA	1	1	1	1	1	1	1
D907_A	con11_hopper	2R	13664150	13664163	1	1	1	1	P0-C-A-N	NA	1	1	1	1	1	1	1
D907_A	con11_hopper	3L	12721742	12721753	1	1	1	1	P0-C-A-N	NA	1	1	1	1	1	1	1
D907_A	con11_hopper	X	14568926	14568947	1	1	1	1	P0-C-A-N	NA	1	1	1	1	1	1	1
D907_A	con11_hopper	X	14989298	14989327	1	1	1	1	P0-C-A-N	NA	1	1	1	1	1	1	1
D907_A	con11_hopper	X	15259638	15259648	1	1	1	1	P0-C-A-N	NA	1	1	1	1	1	1	1
D907_A	con11_hopper	X	17046557	17046579	1	1	1	1	P0-C-A-N	NA	1	1	1	1	1	1	1
D907_A	con11_hopper	X	20083507	20083519	1	1	1	1	P0-C-A-N	NA	1	1	1	1	1	1	1
D907_A	con12_Doc	2L	14555825	14555861	1	1	1	1	P0-C-A-N	NA	1	1	1	1	1	1	1
D907_A	con12_Doc	2R	17939686	17939702	1	1	1	1	P0-C-A-N	NA	1	1	1	1	1	1	1
D907_A	con12_Doc	2R	20291322	20291337	1	1	1	1	P0-C-A-N	NA	1	1	1	1	1	1	1
D907_A	con12_Doc	3L	2146412	2146426	1	1	1	1	P0-C-A-N	NA	1	1	1	1	1	1	1
D907_A	con12_Doc	3L	9943656	9943674	1	1	1	1	P0-C-A-N	NA	1	1	1	1	1	1	1
D907_A	con12_Doc	3R	16557990	16558024	1	1	1	1	P0-C-A-N	NA	1	1	1	1	1	1	1
D907_A	con12_Doc	X	3806457	3806476	1	1	1	1	P0-C-A-N	NA	1	1	1	1	1	1	1
D907_A	con12_Doc	X	18410347	18410360	1	1	1	1	P0-C-A-N	NA	1	1	1	1	1	1	1
D907_A	con13_UnFmcl013_RLX-incomp	2L	2851528	2851559	1	1	1	1	P0-C-A-N	NA	1	1	1	1	1	1	1
D907_A	con13_UnFmcl013_RLX-incomp	2R	22571769	22571790	1	1	1	1	P0-C-A-N	NA	1	1	1	1	1	1	1
D907_A	con13_UnFmcl013_RLX-incomp	3L	17997413	17997435	1	1	1	1	P0-C-A-N	NA	1	1	1	1	1	1	1
D907_A	con13_UnFmcl013_RLX-incomp	X	6095005	6095022	1	1	1	1	P0-C-A-N	NA	1	1	1	1	1	1	1
D907_A	con13_UnFmcl013_RLX-incomp	X	12263731	12263770	1	1	1	1	P0-C-A-N	NA	1	1	1	1	1	1	1
D907_A	con13_diver	2R	13127590	13127605	1	1	1	1	P0-C-A-N	NA	1	1	1	1	1	1	1
D907_A	con14_F-element	2L	11044302	11044311	1	1	1	1	P0-C-A-N	NA	1	1	1	1	1	1	1
D907_A	con14_F-element	2L	13342201	13342218	1	1	1	1	P0-C-A-N	NA	1	1	1	1	1	1	1
D907_A	con14_F-element	2L	15128524	15128538	1	1	1	1	P0-C-A-N	NA	1	NA	1	1	NA	NA	1
D907_A	con14_F-element	2L	17645937	17645953	1	1	1	1	P0-C-A-N	NA	1	1	1	1	1	1	1
D907_A	con14_F-element	2L	18477101	18477120	1	1	1	1	P0-C-A-N	NA	1	1	1	1	1	1	1
D907_A	con14_F-element	2R	6681722	6681735	1	1	1	1	P0-C-A-N	NA	1	1	1	1	1	1	1
D907_A	con14_F-element	2R	11030559	11030573	1	1	1	1	P0-C-A-N	NA	1	1	1	1	1	1	1
D907_A	con14_F-element	2R	17029306	17029328	1	1	1	1	P0-C-A-N	NA	1	1	1	1	1	1	1
D907_A	con14_F-element	2R	17257202	17257214	1	1	1	1	P0-C-A-N	NA	1	1	1	1	1	1	1
D907_A	con14_F-element	2R	19107394	19107420	1	1	1	1	P0-C-A-N	NA	1	1	1	1	1	1	1
D907_A	con14_F-element	3L	2691984	2692006	1	1	1	1	P0-C-A-N	NA	1	1	1	1	1	1	1
D907_A	con14_F-element	3L	5829271	5829304	1	1	1	1	P0-C-A-N	NA	1	1	1	1	1	1	1
D907_A	con14_F-element	3L	10705391	10705607	1	1	1	1	P0-C-A-N	NA	1	1	1	1	1	1	1
D907_A	con14_F-element	3L	13636417	13636426	1	1	1	1	P0-C-A-N	NA	1	1	1	1	1	1	1
D907_A	con14_F-element	3L	14559134	14559151	1	1	1	1	P0-C-A-N	NA	1	1	1	1	1	1	1
D907_A	con14_F-element	3L	17050358	17050374	1	1	1	1	P0-C-A-N	NA	1	1	1	1	1	1	1
D907_A	con14_Juan	3L	17706403	17706422	1	1	1	1	P0-C-A-N	NA	1	1	1	1	1	1	1
D907_A	con14_Juan	X	5216341	5216366	1	1	1	1	P0-C-A-N	NA	1	1	1	1	1	1	1
D907_A	con14_Rt1a	3L	17170912	17170945	1	1	1	1	P0-C-A-N	NA	1	1	1	1	1	1	1
D907_A	con14_Rt1a	X	9822764	9822782	1	1	1	1	P0-C-A-N	NA	1	1	1	1	1	1	1
D907_A	con15_Rt1b	2R	12113802	12113820	1	1	1	1	P0-C-A-N	NA	1	1	1	1	1	1	1
D907_A	con15_Rt1b	2R	15395414	15395419	1	1	1	1	P0-C-A-N	NA	1	1	1	1	1	1	1
D907_A	con15_Rt1b	3L	17697996	17698041	1	1	1	1	P0-C-A-N	NA	1	1	1	1	1	1	1
D907_A	con15_Rt1b	X	9342797	9342814	1	1	1	1	P0-C-A-N	NA	1	1	1	1	1	1	1
D907_A	con15_flea	2R	12809549	12809561	1	1	1	1	P0-C-A-N	NA	1	1	1	1	1	1	1
D907_A	con15_flea	3L	7952423	7952435	1	1	1	1	P0-C-A-N	NA	1	1	1	1	1	1	1
D907_A	con15_flea	3L	12986432	12986440	1	1	1	1	P0-C-A-N	NA	1	1	1	1	1	1	1
D907_A	con15_flea	3L	13714359	13714377	1	1	1	1	P0-C-A-N	NA	1	1	1	1	1	1	1
D907_A	con15_pogo	2R	11394141	11394171	1	1	1	1	P0-C-A-N	NA	1	1	1	1	1	1	1
D907_A	con15_pogo	2R	14921529	14921538	1	1	1	1	P0-C-A-N	NA	1	1	1	1	1	1	1
D907_A	con15_pogo	3L	2426697	2426892	1	1	1	1	P0-C-A-N	NA	1	1	1	1	1	1	1
D907_A	con15_pogo	3L	9858300	9858314	1	1	1	1	P0-C-A-N	NA	1	1	1	1	1	1	1
D907_A	con15_pogo	X	11221561	11221743	1	1	1	1	P0-C-A-N	NA	1	1	1	1	1	1	1
D907_A	con16_blood	2L	956183	956202	1	1	1	1	P0-C-A-N	NA	1	1	1	1	1	1	1
D907_A	con16_blood	2L	5672910	5672928	1	1	1	1	P0-C-A-N	NA	1	1	1	1	1	1	1
D907_A	con16_blood	2L	6021149	6021160	1	1	1	1	P0-C-A-N	NA	1	1	1	1	1	1	1
D907_A	con16_blood	2L	7596956	7596971	1	1	1	1	P0-C-A-N	NA	1	1	1	1	1	1	1
D907_A	con16_blood	2L	12753933	12753937	1	1	1	1	P0-C-A-N	NA	1	1	1	1	1	1	1
D907_A	con16_blood	2L	13310457	13310472	1	1	1	1	P0-C-A-N	NA	1	1	1	1	1	1	1
D907_A	con16_blood	2R	7195823	7195841	1	1	1	1	P0-C-A-N	NA	1	1	1	1	1	1	1
D907_A	con16_blood	2R	10763680	10763698	1	1	1	1	P0-C-A-N	NA	1	1	1	1	1	1	1
D907_A	con16_blood	2R	14414158	14414173	1	1	1	1	P0-C-A-N	NA	1	1	1	1	1	1	1
D907_A	con16_blood	3L	1074745	1074749	1	1	1	1	P0-C-A-N	NA	1	1	1	1	1	1	1
D907_A	con16_blood	X	2350610	2350621	1	1	1	1	P0-C-A-N	NA	1	1	1	1	1	1	1
D907_A	con17_Max-element	3R	12720512	12720545	1	1	1	1	P0-C-A-N	NA	1	1	1	1	1	1	1
D907_A	con17_rover	2R	7632048	7632061	1	1	1	1	P0-C-A-N	NA	1	1	1	1	1	1	1
D907_A	con19_Quasimodo	2L	12622110	12622128	1	1	1	1	P0-C-A-N	NA	1	1	1	1	1	1	1
D907_A	con19_Quasimodo	2L	15186489	15186524	1	1	1	1	P0-C-A-N	NA	1	1	1	1	1	1	1
D907_A	con19_Quasimodo	2R	21962649	21962674	1	1	1	1	P0-C-A-N	NA	1	1	1	1	1	1	1
D907_A	con19_Quasimodo	3L	3127435	3127450	1	1	1	1	P0-C-A-N	NA	1	1	1	1	1	1	1
D907_A	con19_Quasimodo	3L	16799008	16799033	1	1	1	1	P0-C-A-N	NA	1	1	1	1	1	1	1
D907_A	con19_Quasimodo	3L	16827741	16827755	1	1	1	1	P0-C-A-N	NA	1	1	1	1	1	1	1
D907_A	con19_Quasimodo	X	8037719	8037737	1	1	1	1	P0-C-A-N	NA	1	1	1	1	1	1	1
D907_A	con19_transib2	3R	14049385	14049400	1	1	1	1	P0-C-A-N	NA	1	1	1	1	1	1	1
D907_A	con20_Burdock	2L	2794221	2794234	1	1	1	1	P0-C-A-N	NA	1	1	1	1	1	1	1
D907_A	con20_Burdock	2R	13054001	13054198	1	1	1	1	P0-C-A-N	NA	1	1	1	1	1	1	1
D907_A	con20_Burdock	2R	13403541	13403566	1	1	1	1	P0-C-A-N	NA	1	1	1	1	1	1	1
D907_A	con20_HMS-Beagle	2R	11246421	11246437	1	1	1	1	P0-C-A-N	NA	1	1	1	1	1	1	1
D907_A	con20_HMS-Beagle	X	2663071	2663092	1	1	1	1	P0-C-A-N	NA	1	1	1	1	1	1	1
D907_A	con20_jockey	2L	13842321	13842338	1	1	1	1	P0-C-A-N	NA	1	1	1	1	1	1	1
D907_A	con20_jockey	2L	16551458	16551468	1	1	1	1	P0-C-A-N	NA	1	1	1	1	1	1	1
D907_A	con20_jockey	2R	11582060	11582083	1	1	1	1	P0-C-A-N	NA	1	1	1	1	1	1	1
D907_A	con20_jockey	2R	15306409	15306433	1	1	1	1	P0-C-A-N	NA	1	1	1	1	1	1	1
D907_A	con20_jockey	2R	18514146	18514168	1	1	1	1	P0-C-A-N	NA	1	1	1	1	1	1	1
D907_A	con20_jockey	2R	20840733	20840746	1	1	1	1	P0-C-A-N	NA	1	1	1	1	1	1	1
D907_A	con20_jockey	3L	2609062	2609100	1	1	1	1	P0-C-A-N	NA	1	1	1	1	1	1	1
D907_A	con20_jockey	3L	6630496	6630506	1	1	1	1	P0-C-A-N	NA	1	1	1	1	1	1	1
D907_A	con20_jockey	3L	7223024	7223049	1	1	1	1	P0-C-A-N	NA	1	1	1	1	1	1	1
D907_A	con20_jockey	3L	10125478	10125506	1	1	1	1	P0-C-A-N	NA	1	1	1	1	1	1	1
D907_A	con20_jockey	3L	10644809	10644853	1	1	1	1	P0-C-A-N	NA	1	1	1	1	1	1	1
D907_A	con20_jockey	3L	10865643	10865665	1	1	1	1	P0-C-A-N	NA	1	1	1	1	1	1	1
D907_A	con20_jockey	3L	17936966	17936985	1	1	1	1	P0-C-A-N	NA	1	1	1	1	1	1	1
D907_A	con20_jockey	3L	18957201	18957227	1	1	1	1	P0-C-A-N	NA	1	1	1	1	1	1	1
D907_A	con20_jockey	3R	16068343	16068370	1	1	1	1	P0-C-A-N	NA	1	1	1	1	1	1	1
D907_A	con20_jockey	3R	17108985	17109015	1	1	1	1	P0-C-A-N	NA	1	1	1	1	1	1	1
D907_A	con20_jockey	X	2214118	2214310	1	1	1	1	P0-C-A-N	NA	1	1	1	1	1	1	1
D907_A	con20_jockey	X	3334980	3334996	1	1	1	1	P0-C-A-N	NA	1	1	1	1	1	1	1
D907_A	con20_jockey	X	9857907	9857929	1	1	1	1	P0-C-A-N	NA	1	1	1	1	1	1	1
D907_A	con20_jockey	X	10418719	10418745	1	1	1	1	P0-C-A-N	NA	1	1	1	1	1	1	1
D907_A	con20_jockey	X	14293667	14293687	1	1	1	1	P0-C-A-N	NA	1	1	1	1	1	1	1
D907_A	con20_jockey	X	14397357	14397391	1	1	1	1	P0-C-A-N	NA	1	1	1	1	1	1	1
D907_A	con20_jockey	X	14862594	14862623	1	1	1	1	P0-C-A-N	NA	1	1	1	1	1	1	1
D907_A	con20_jockey	X	18239229	18239253	1	1	1	1	P0-C-A-N	NA	1	1	1	1	1	1	1
D907_A	con21_Ivk	2L	10959217	10959247	1	1	1	1	P0-C-A-N	NA	1	1	1	1	1	1	1
D907_A	con21_Ivk	X	19367542	19367570	1	1	1	1	P0-C-A-N	NA	1	1	1	1	1	1	1
D907_A	con22_Stalker2	3L	17788792	17788799	1	1	1	1	P0-C-A-N	NA	1	1	1	1	1	1	1
D907_A	con22_Stalker2	3R	17362560	17362577	1	1	1	1	P0-C-A-N	NA	1	1	1	1	1	1	1
D907_A	con22_Stalker2	X	18742866	18742885	1	1	1	1	P0-C-A-N	NA	1	1	1	1	1	1	1
D907_A	con23_copia	2L	4583007	4583022	1	1	1	1	P0-C-A-N	NA	1	1	1	1	1	1	1
D907_A	con23_copia	2L	5600719	5600728	1	1	1	1	P0-C-A-N	NA	1	1	1	1	1	1	1
D907_A	con23_copia	2L	11578873	11578880	1	1	1	1	P0-C-A-N	NA	1	1	1	1	1	1	1
D907_A	con23_copia	2L	12143114	12143122	1	1	1	1	P0-C-A-N	NA	1	1	1	1	1	1	1
D907_A	con23_copia	2L	16227900	16227916	1	1	1	1	P0-C-A-N	NA	1	1	1	1	1	1	1
D907_A	con23_copia	2R	24434898	24434936	1	1	1	1	P0-C-A-N	NA	1	1	1	1	1	1	1
D907_A	con23_copia	3L	1377395	1377410	1	1	1	1	P0-C-A-N	NA	1	1	1	1	1	1	1
D907_A	con23_copia	X	5681177	5681189	1	1	1	1	P0-C-A-N	NA	1	1	1	1	1	1	1
D907_A	con23_copia	X	7056679	7056716	1	1	1	1	P0-C-A-N	NA	1	1	1	1	1	1	1
D907_A	con24_Transpac	2L	4867215	4867231	1	1	1	1	P0-C-A-N	NA	1	1	1	1	1	1	1
D907_A	con24_Transpac	2L	9204667	9204688	1	1	1	1	P0-C-A-N	NA	1	1	1	1	1	1	1
D907_A	con24_Transpac	3L	5962292	5962443	1	1	1	1	P0-C-A-N	NA	1	1	1	1	1	1	1
D907_A	con24_Transpac	X	13374555	13374578	1	1	1	1	P0-C-A-N	NA	1	1	1	1	1	1	1
D907_A	con24_X-element	2R	10442727	10442741	1	1	1	1	P0-C-A-N	NA	1	1	1	1	1	1	1
D907_A	con24_X-element	2R	23288222	23288241	1	1	1	1	P0-C-A-N	NA	1	1	1	1	1	1	1
D907_A	con24_X-element	X	9577224	9577248	1	1	1	1	P0-C-A-N	NA	1	1	1	1	1	1	1
D907_A	con25_1360	2L	4912643	4912767	1	1	1	1	P0-C-A-N	NA	1	1	1	1	1	1	1
D907_A	con25_1360	2L	10402890	10402898	1	1	1	1	P0-C-A-N	NA	1	1	1	1	1	1	1
D907_A	con25_1360	2R	7247777	7247799	1	1	1	1	P0-C-A-N	NA	1	1	1	1	1	1	1
D907_A	con25_1360	2R	9968393	9968411	1	1	1	1	P0-C-A-N	NA	1	1	1	1	1	1	1
D907_A	con25_1360	2R	15374777	15374964	1	1	1	1	P0-C-A-N	NA	1	1	1	1	1	1	1
D907_A	con25_1360	X	21205030	21205113	1	1	1	1	P0-C-A-N	NA	1	1	1	1	1	1	1
D907_A	con25_opus	2L	11688987	11688995	1	1	1	1	P0-C-A-N	NA	1	1	1	1	1	1	1
D907_A	con25_opus	2L	17243611	17243634	1	1	1	1	P0-C-A-N	NA	1	1	1	1	1	1	1
D907_A	con25_opus	2R	18753248	18753279	1	1	1	1	P0-C-A-N	NA	1	1	1	1	1	1	1
D907_A	con25_opus	3L	1199288	1199325	1	1	1	1	P0-C-A-N	NA	1	1	1	1	1	1	1
D907_A	con25_opus	3L	2768555	2768574	1	1	1	1	P0-C-A-N	NA	1	1	1	1	1	1	1
D907_A	con26_BS	2L	16138732	16138941	1	1	1	1	P0-C-A-N	NA	1	1	1	1	1	1	1
D907_A	con26_BS	X	15280195	15280212	1	1	1	1	P0-C-A-N	NA	1	1	1	1	1	1	1
D907_A	con26_BS	X	20258063	20258077	1	1	1	1	P0-C-A-N	NA	1	1	1	1	1	1	1
D907_A	con26_I-element	2L	2860432	2860443	1	1	1	1	P0-C-A-N	NA	1	1	1	1	1	1	1
D907_A	con26_I-element	2L	7712157	7712170	1	1	1	1	P0-C-A-N	NA	1	1	1	1	1	1	1
D907_A	con26_I-element	2L	15467008	15467059	1	1	1	1	P0-C-A-N	NA	1	1	1	1	1	1	1
D907_A	con26_I-element	2R	9663261	9663285	1	1	1	1	P0-C-A-N	NA	1	1	1	1	1	1	1
D907_A	con26_I-element	2R	9686043	9686075	1	1	1	1	P0-C-A-N	NA	1	1	1	1	1	1	1
D907_A	con26_I-element	2R	15937289	15937312	1	1	1	1	P0-C-A-N	NA	1	1	1	1	1	1	1
D907_A	con26_I-element	3L	8751420	8751437	1	1	1	1	P0-C-A-N	NA	1	1	1	1	1	1	1
D907_A	con26_I-element	X	13350681	13350706	1	1	1	1	P0-C-A-N	NA	1	1	1	1	1	1	1
D907_A	con26_I-element	X	14756823	14756856	1	1	1	1	P0-C-A-N	NA	1	1	1	1	1	1	1
D907_A	con26_Tirant	2L	17747469	17747473	1	1	1	1	P0-C-A-N	NA	1	1	1	1	1	1	1
D907_A	con26_Tirant	2R	11597681	11597696	1	1	1	1	P0-C-A-N	NA	1	1	1	1	1	1	1
D907_A	con26_Tirant	2R	16151639	16151643	1	1	1	1	P0-C-A-N	NA	1	1	1	1	1	1	1
D907_A	con26_Tirant	3L	10138201	10138213	1	1	1	1	P0-C-A-N	NA	1	1	1	1	1	1	1
D907_A	con26_Tirant	X	21145762	21145779	1	1	1	1	P0-C-A-N	NA	1	1	1	1	1	1	1
D907_A	con26_mdg3	2L	3880328	3880338	1	1	1	1	P0-C-A-N	NA	1	1	1	1	1	1	1
D907_A	con26_mdg3	2R	17883552	17883587	1	1	1	1	P0-C-A-N	NA	1	1	1	1	1	1	1
D907_A	con26_mdg3	3R	16415450	16415468	1	1	1	1	P0-C-A-N	NA	1	1	1	1	1	1	1
D907_A	con26_mdg3	X	4264789	4264800	1	1	1	1	P0-C-A-N	NA	1	1	1	1	1	1	1
D907_A	con26_mdg3	X	12055183	12055320	1	1	1	1	P0-C-A-N	NA	1	1	1	1	1	1	1
D907_A	con26_mdg3	X	17038940	17038959	1	1	1	1	P0-C-A-N	NA	1	1	1	1	1	1	1
D907_A	con33_17-6	3L	11818970	11819201	1	1	1	1	P0-C-A-N	NA	1	1	1	1	1	1	1
D907_A	con33_17-6	X	12133260	12133458	1	1	1	1	P0-C-A-N	NA	1	NA	1	1	NA	NA	1
D907_A	con33_P-element	2L	2885054	2885235	1	1	1	1	P0-C-A-N	NA	1	1	1	1	1	1	1
D907_A	con33_P-element	2L	7437405	7437432	1	1	1	1	P0-C-A-N	NA	1	1	1	1	1	1	1
D907_A	con33_P-element	2L	9125724	9125783	1	1	1	1	P0-C-A-N	NA	1	1	1	1	1	1	1
D907_A	con33_P-element	2L	9387585	9387606	1	1	1	1	P0-C-A-N	NA	1	1	1	1	1	1	1
D907_A	con33_P-element	2L	12007272	12007287	1	1	1	1	P0-C-A-N	NA	1	1	1	1	1	1	1
D907_A	con33_P-element	2L	16685187	16685277	1	1	1	1	P0-C-A-N	NA	1	1	1	1	1	1	1
D907_A	con33_P-element	2R	10618456	10618472	1	1	1	1	P0-C-A-N	NA	1	1	1	1	1	1	1
D907_A	con33_P-element	2R	13622992	13623026	1	1	1	1	P0-C-A-N	NA	1	1	NA	1	NA	1	NA
D907_A	con33_P-element	2R	19832399	19832422	1	1	1	1	P0-C-A-N	NA	1	1	1	1	1	1	1
D907_A	con33_P-element	3L	3757908	3758099	1	1	1	1	P0-C-A-N	NA	1	1	1	1	1	1	1
D907_A	con33_P-element	X	18356297	18356320	1	1	1	1	P0-C-A-N	NA	1	1	1	1	1	1	1
D907_A	con41_UnFmcl001_RLX-incomp	2L	2889900	2889915	1	1	1	1	P0-C-A-N	NA	1	1	NA	1	NA	1	NA
D907_A	con41_UnFmcl001_RLX-incomp	2L	12265751	12265770	1	1	1	1	P0-C-A-N	NA	1	1	1	1	1	1	1
D907_A	con41_UnFmcl001_RLX-incomp	3L	13635944	13636051	1	1	1	1	P0-C-A-N	NA	1	1	1	1	1	1	1
D907_A	con41_UnFmcl001_RLX-incomp	3L	15547710	15547715	1	1	1	1	P0-C-A-N	NA	1	1	1	1	1	1	1
D907_A	con41_UnFmcl001_RLX-incomp	X	15042303	15042320	1	1	1	1	P0-C-A-N	NA	1	1	1	1	1	1	1
D907_A	con41_UnFmcl001_RLX-incomp	X	15313389	15313405	1	1	1	1	P0-C-A-N	NA	1	1	1	1	1	1	1
D907_A	con41_UnFmcl001_RLX-incomp	X	18752400	18752409	1	1	1	1	P0-C-A-N	NA	1	1	1	1	1	1	1
D907_A	con41_UnFmcl001_RLX-incomp	X	19355372	19355391	1	1	1	1	P0-C-A-N	NA	1	1	1	1	1	1	1
D907_A	con42_mdg1	2L	12332646	12332687	1	1	1	1	P0-C-A-N	NA	1	1	1	1	1	1	1
D907_A	con42_mdg1	2R	8159093	8159104	1	1	1	1	P0-C-A-N	NA	1	1	1	1	1	1	1
D907_A	con42_mdg1	2R	16693960	16693987	1	1	1	1	P0-C-A-N	NA	1	1	1	1	1	1	1
D907_A	con42_mdg1	2R	24851811	24851815	1	1	1	1	P0-C-A-N	NA	1	1	1	1	1	1	1
D907_A	con42_mdg1	3L	14822885	14822898	1	1	1	1	P0-C-A-N	NA	1	1	1	1	1	1	1
D907_A	con43_H	2L	3890592	3890614	1	1	1	1	P0-C-A-N	NA	1	1	1	1	1	1	1
D907_A	con43_H	2L	7435639	7435664	1	1	1	1	P0-C-A-N	NA	1	1	1	1	1	1	1
D907_A	con43_H	2L	9021133	9021155	1	1	1	1	P0-C-A-N	NA	1	1	1	1	1	1	1
D907_A	con43_H	2L	12817190	12817203	1	1	1	1	P0-C-A-N	NA	1	1	1	1	1	1	1
D907_A	con43_H	2R	10049191	10049204	1	1	1	1	P0-C-A-N	NA	1	1	1	1	1	1	1
D907_A	con43_H	2R	10723549	10723586	1	1	1	1	P0-C-A-N	NA	1	1	1	1	1	1	1
D907_A	con43_H	2R	11030059	11030071	1	1	1	1	P0-C-A-N	NA	1	1	1	1	1	1	1
D907_A	con43_H	2R	13673991	13673999	1	1	1	1	P0-C-A-N	NA	1	1	1	1	1	1	1
D907_A	con43_H	2R	22796798	22796806	1	1	1	1	P0-C-A-N	NA	1	1	1	1	1	1	1
D907_A	con43_H	3L	4596465	4596511	1	1	1	1	P0-C-A-N	NA	1	1	1	1	1	1	1
D907_A	con43_H	3L	4924420	4924437	1	1	1	1	P0-C-A-N	NA	1	1	1	1	1	1	1
D907_A	con43_H	3L	17294578	17294591	1	1	1	1	P0-C-A-N	NA	1	1	1	1	1	1	1
D907_A	con43_H	3L	18024136	18024150	1	1	1	1	P0-C-A-N	NA	1	1	1	1	1	1	1
D907_A	con43_H	X	5192845	5192853	1	1	1	1	P0-C-A-N	NA	1	1	1	1	1	1	1
D907_A	con43_H	X	13434603	13434630	1	1	1	1	P0-C-A-N	NA	1	1	1	1	1	1	1
D907_A	con43_H	X	14617758	14617776	1	1	1	1	P0-C-A-N	NA	1	1	1	1	1	1	1
D907_A	con43_H	X	20287757	20287765	1	1	1	1	P0-C-A-N	NA	1	1	1	1	1	1	1
D907_A	con43_H	X	20540612	20540646	1	1	1	1	P0-C-A-N	NA	1	1	1	1	1	1	1
D907_A	con45_Tabor	2L	13345370	13345382	1	1	1	1	P0-C-A-N	NA	1	1	1	1	1	1	1
D907_A	con46_297	2L	1341766	1341792	1	1	1	1	P0-C-A-N	NA	1	1	1	1	1	1	1
D907_A	con46_297	2L	2288395	2288433	1	1	1	1	P0-C-A-N	NA	1	1	1	1	1	1	1
D907_A	con46_297	2L	3957575	3957780	1	1	1	1	P0-C-A-N	NA	1	1	1	1	1	1	1
D907_A	con46_297	2L	9850438	9850466	1	1	1	1	P0-C-A-N	NA	1	1	1	1	1	1	1
D907_A	con46_297	2L	12554334	12554559	1	1	1	1	P0-C-A-N	NA	1	1	1	1	1	1	1
D907_A	con46_297	2L	12796410	12796437	1	1	1	1	P0-C-A-N	NA	1	1	1	1	1	1	1
D907_A	con46_297	2L	15975869	15975882	1	1	1	1	P0-C-A-N	NA	1	1	1	1	1	1	1
D907_A	con46_297	2L	17100133	17100157	1	1	1	1	P0-C-A-N	NA	1	1	1	1	1	1	1
D907_A	con46_297	2R	23682913	23682931	1	1	1	1	P0-C-A-N	NA	1	1	1	1	1	1	1
D907_A	con46_297	3L	11844198	11844383	1	1	1	1	P0-C-A-N	NA	1	1	1	1	1	1	1
D907_A	con46_297	3L	17719029	17719057	1	1	1	1	P0-C-A-N	NA	1	1	1	1	1	1	1
D907_A	con46_297	3R	17288864	17288883	1	1	1	1	P0-C-A-N	NA	1	1	1	1	1	1	1
D907_A	con46_297	3R	17421284	17421319	1	1	1	1	P0-C-A-N	NA	1	1	1	1	1	1	1
D907_A	con46_297	X	6900555	6900565	1	1	1	1	P0-C-A-N	NA	1	1	1	1	1	1	1
D907_A	con48_412	2L	4740102	4740108	1	1	1	1	P0-C-A-N	NA	1	1	1	1	1	1	1
D907_A	con48_412	2L	8964964	8964984	1	1	1	1	P0-C-A-N	NA	1	1	1	1	1	1	1
D907_A	con48_412	2L	12525541	12525568	1	1	1	1	P0-C-A-N	NA	1	1	1	1	1	1	1
D907_A	con48_412	2R	13971583	13971604	1	1	1	1	P0-C-A-N	NA	1	1	1	1	1	1	1
D907_A	con48_412	2R	15300909	15300916	1	1	1	1	P0-C-A-N	NA	1	1	1	1	1	1	1
D907_A	con48_412	3L	3701404	3701429	1	1	1	1	P0-C-A-N	NA	1	1	1	1	1	1	1
D907_A	con48_412	3L	5493658	5493673	1	1	1	1	P0-C-A-N	NA	1	1	1	1	1	1	1
D907_A	con48_412	3L	13067318	13067329	1	1	1	1	P0-C-A-N	NA	1	1	1	1	1	1	1
D907_A	con48_412	3L	13142222	13142358	1	1	1	1	P0-C-A-N	NA	1	1	1	1	1	1	1
D907_A	con48_412	X	7746964	7746985	1	1	1	1	P0-C-A-N	NA	1	1	1	1	1	1	1
D907_A	con48_412	X	14976331	14976361	1	1	1	1	P0-C-A-N	NA	1	1	1	1	1	1	1
D907_A	con48_roo	2L	634687	634692	1	1	1	1	P0-C-A-N	NA	1	1	1	1	1	1	1
D907_A	con48_roo	2L	2522365	2522384	1	1	1	1	P0-C-A-N	NA	1	1	1	1	1	1	1
D907_A	con48_roo	2L	2631423	2631465	1	1	1	1	P0-C-A-N	NA	1	1	1	1	1	1	1
D907_A	con48_roo	2L	2691955	2691978	1	1	1	1	P0-C-A-N	NA	1	1	1	1	1	1	1
D907_A	con48_roo	2L	4154597	4154813	1	1	1	1	P0-C-A-N	NA	1	1	1	1	1	1	1
D907_A	con48_roo	2L	4714523	4714546	1	1	1	1	P0-C-A-N	NA	1	1	1	1	1	1	1
D907_A	con48_roo	2L	7990586	7990599	1	1	1	1	P0-C-A-N	NA	1	1	1	1	1	1	1
D907_A	con48_roo	2L	17121431	17121458	1	1	1	1	P0-C-A-N	NA	1	1	1	1	1	1	1
D907_A	con48_roo	2L	17818822	17818838	1	1	1	1	P0-C-A-N	NA	1	1	1	1	1	1	1
D907_A	con48_roo	2R	6517193	6517209	1	1	1	1	P0-C-A-N	NA	1	1	1	1	1	1	1
D907_A	con48_roo	2R	7942700	7942720	1	1	1	1	P0-C-A-N	NA	1	1	1	1	1	1	1
D907_A	con48_roo	2R	9560663	9560672	1	1	1	1	P0-C-A-N	NA	1	1	1	1	1	1	1
D907_A	con48_roo	2R	9950743	9950754	1	1	1	1	P0-C-A-N	NA	1	1	1	1	1	1	1
D907_A	con48_roo	2R	10012771	10012784	1	1	1	1	P0-C-A-N	NA	1	1	1	1	1	1	1
D907_A	con48_roo	2R	13544972	13544998	1	1	1	1	P0-C-A-N	NA	1	1	1	1	1	1	1
D907_A	con48_roo	2R	18472573	18472597	1	1	1	1	P0-C-A-N	NA	1	1	1	1	1	1	1
D907_A	con48_roo	2R	21437773	21437788	1	1	1	1	P0-C-A-N	NA	1	1	1	1	1	1	1
D907_A	con48_roo	2R	24459451	24459473	1	1	1	1	P0-C-A-N	NA	1	1	1	1	1	1	1
D907_A	con48_roo	3L	825433	825579	1	1	1	1	P0-C-A-N	NA	1	1	1	1	1	1	1
D907_A	con48_roo	3L	3751930	3751941	1	1	1	1	P0-C-A-N	NA	1	1	1	1	1	1	1
D907_A	con48_roo	3L	5221183	5221203	1	1	1	1	P0-C-A-N	NA	1	1	1	1	1	1	1
D907_A	con48_roo	3L	5885680	5885698	1	1	1	1	P0-C-A-N	NA	1	1	1	1	1	1	1
D907_A	con48_roo	3L	6592477	6592484	1	1	1	1	P0-C-A-N	NA	1	1	1	1	1	1	1
D907_A	con48_roo	3L	6657721	6657918	1	1	1	1	P0-C-A-N	NA	1	1	1	1	1	1	1
D907_A	con48_roo	3L	8200091	8200124	1	1	1	1	P0-C-A-N	NA	1	1	1	1	1	1	1
D907_A	con48_roo	3L	8876262	8876283	1	1	1	1	P0-C-A-N	NA	1	1	1	1	1	1	1
D907_A	con48_roo	3L	12199045	12199051	1	1	1	1	P0-C-A-N	NA	1	1	1	1	1	1	1
D907_A	con48_roo	3L	16888609	16888625	1	1	1	1	P0-C-A-N	NA	1	1	1	1	1	1	1
D907_A	con48_roo	3L	17132322	17132340	1	1	1	1	P0-C-A-N	NA	1	1	1	1	1	1	1
D907_A	con48_roo	3L	17201922	17201941	1	1	1	1	P0-C-A-N	NA	1	1	1	1	1	1	1
D907_A	con48_roo	3L	18888433	18888463	1	1	1	1	P0-C-A-N	NA	1	1	1	1	1	1	1
D907_A	con48_roo	X	7114380	7114390	1	1	1	1	P0-C-A-N	NA	1	1	1	1	1	1	1
D907_A	con48_roo	X	7118537	7118558	1	1	1	1	P0-C-A-N	NA	1	1	1	1	1	1	1
D907_A	con48_roo	X	10132698	10132716	1	1	1	1	P0-C-A-N	NA	1	1	1	1	1	1	1
D907_A	con48_roo	X	10487833	10487854	1	1	1	1	P0-C-A-N	NA	1	1	1	1	1	1	1
D907_A	con48_roo	X	11061839	11061871	1	1	1	1	P0-C-A-N	NA	1	1	1	1	1	1	1
D907_A	con48_roo	X	15412488	15412512	1	1	1	1	P0-C-A-N	NA	1	1	1	1	1	1	1
D907_A	con48_roo	X	15705741	15705753	1	1	1	1	P0-C-A-N	NA	1	1	1	1	1	1	1
D907_A	con48_roo	X	16988808	16988814	1	1	1	1	P0-C-A-N	NA	1	1	1	1	1	1	1
D907_A	con48_roo	X	19075664	19075678	1	1	1	1	P0-C-A-N	NA	1	1	1	1	1	1	1
D907_A	con48_roo	X	19829772	19829778	1	1	1	1	P0-C-A-N	NA	1	1	1	1	1	1	1
D907_A	con8_G2	2L	3265152	3265169	1	1	1	1	P0-C-A-N	NA	1	1	1	1	1	1	1
D907_A	con2_NOF	X	19369817	19370008	0.010989	NA	0.444444	0.0243902	P0-A-N	NA	1.11e-17	1.19e-10	NA	1.95e-12	NA	0.604	NA
D907_A	con15_pogo	2R	18352087	18352400	0.219512	NA	0.349398	0.333333	P0-A-N	NA	0.135	1	NA	0.216	NA	0.216	NA
D907_A	con15_pogo	2R	18336263	18336420	0.495495	NA	0.378641	0.505155	P0-A-N	NA	0.242	0.277	NA	0.277	NA	1	NA
D907_A	con33_P-element	3R	8090561	8090764	0.666667	NA	0.555556	0.294118	P0-A-N	NA	0.356	0.462	NA	1	NA	0.462	NA
D907_A	con20_Burdock	X	19720725	19720769	1	NA	1	1	P0-A-N	NA	1	1	NA	1	NA	1	NA
D907_A	con20_jockey	X	21238116	21238154	0.709677	0.552795	0.0724638	NA	P0-C-A	-3.06174	1.03e-29	NA	6.62e-20	5.13e-26	NA	NA	0.0424
D907_A	con13_UnFmcl013_RLX-incomp	2L	5813212	5813236	0.0691244	0.115646	0.654545	NA	P0-C-A	11.5838	7.12e-25	NA	8.14e-15	2.32e-22	NA	NA	0.171
D907_A	con41_UnFmcl001_RLX-incomp	X	2787022	2787027	0.0860215	0.0769231	0.63964	NA	P0-C-A	61.8479	2.72e-24	NA	1.86e-18	1.86e-18	NA	NA	0.841
D907_A	con22_S-element	3R	9347478	9347783	0.044335	0.0582011	0.231788	NA	P0-C-A	12.5188	1.65e-07	NA	2.56e-05	2.51e-06	NA	NA	0.64
D907_A	con17_invader3	3R	9192458	9192662	0.0612245	0.0482759	0.148148	NA	P0-C-A	7.71297	0.0194	NA	0.0348	0.0663	NA	NA	0.793
D907_A	con3_G4	3L	15099621	15099855	0.0146341	0.026455	0.00444444	NA	P0-C-A	-1.862	0.181	NA	0.292	0.486	NA	NA	0.486
D907_A	con20_jockey	3R	31458060	31458088	0.973684	0.974359	1	NA	P0-C-A	37.9867	1	NA	1	1	NA	NA	1
D907_A	con48_roo	3R	22226626	22226640	0.378151	0.456522	NA	1	P0-C-N	6.93468	3.14e-16	1	1.22e-07	8.73e-10	1.22e-07	8.73e-10	0.485
D907_A	con25_1360	2R	6491280	6492460	0.111111	0.0967742	NA	1	P0-C-N	NA	1.43e-13	NA	NA	NA	3.09e-12	6.16e-12	0.829
D907_A	con15_pogo	X	10973739	10974047	0.580952	0.367742	NA	0.365517	P0-C-N	NA	0.0073	NA	NA	NA	1	0.0097	0.0097
D907_A	con24_Transpac	X	17784382	17784602	0.442177	0.428571	NA	0.515152	P0-C-N	NA	0.476	NA	NA	NA	0.573	0.573	0.884
D907_A	con15_pogo	2L	11891042	11891353	0.275862	0.305785	NA	0.232	P0-C-N	NA	0.518	NA	NA	NA	0.745	0.745	0.745
D907_A	con26_Tirant	3R	22633193	22633213	NA	0.584615	1	1	C-A-N	2.59685	5.14e-24	1	3.87e-09	1.5e-14	7.98e-10	1.94e-15	0.0466
D907_A	con2_NOF	3L	2549328	2549730	NA	0.00699301	0.38961	1	C-A-N	NA	7.44e-17	1	2.83e-16	NA	0.0411	NA	NA
D907_A	con48_roo	3L	18085458	18085476	NA	0.129412	1	0.169231	C-A-N	NA	4.97e-11	1.82e-08	3.24e-10	NA	0.621	NA	NA
D907_A	con20_jockey	3R	22864352	22864366	NA	0.589744	0.96875	1	C-A-N	NA	4.75e-05	NA	4.75e-05	NA	NA	NA	NA
D907_A	con20_jockey	2L	1258717	1258752	NA	1	0.974026	1	C-A-N	NA	0.727	1	1	1	1	1	1
D907_A	con10_3S18	3L	7402066	7402071	NA	1	1	1	C-A-N	NA	1	1	1	NA	1	NA	NA
D907_A	con48_roo	3R	20359873	20360094	0.278351	NA	1	NA	P0-A	NA	6.07e-11	NA	NA	6.07e-11	NA	NA	NA
D907_A	con14_F-element	3L	16546726	16546875	0.205128	NA	0.424	NA	P0-A	NA	0.00065	NA	NA	0.00065	NA	NA	NA
D907_A	con13_UnFmcl013_RLX-incomp	2R	10789174	10789199	0.0738916	NA	0.185629	NA	P0-A	NA	0.00262	NA	NA	0.00262	NA	NA	NA
D907_A	con15_pogo	2R	24021429	24021738	0.469136	NA	0.536424	NA	P0-A	NA	0.337	NA	NA	0.337	NA	NA	NA
D907_A	con11_hopper	2L	13305613	13305788	0.00389105	NA	0.00389105	NA	P0-A	NA	1	NA	NA	1	NA	NA	NA
D907_A	con14_F-element	2L	3366040	3366215	0.00401606	NA	0.0052356	NA	P0-A	NA	1	NA	NA	1	NA	NA	NA
D907_A	con16_blood	2R	9148505	9148680	0.00502513	NA	0.00440529	NA	P0-A	NA	1	NA	NA	1	NA	NA	NA
D907_A	con15_pogo	3R	13975543	13975855	0.316239	NA	NA	0.342282	P0-N	NA	0.762	NA	NA	NA	NA	0.762	NA
D907_A	con26_Tirant	2L	11358550	11358574	1	NA	NA	1	P0-N	NA	1	1	1	1	1	1	1
D907_A	con20_Burdock	3L	10923109	10923120	1	1	NA	NA	P0-C	NA	1	1	1	1	1	1	1
D907_A	con15_pogo	2R	19414661	19414970	NA	0.244444	0.535714	NA	C-A	NA	1.75e-05	NA	1.75e-05	NA	NA	NA	NA
D907_A	con14_Juan	3L	16146601	16146828	NA	0.0502793	0.203125	NA	C-A	NA	0.000115	NA	0.000115	NA	NA	NA	NA
D907_A	con14_Juan	3R	17401459	17401770	NA	0.102941	0.145833	NA	C-A	NA	0.392	NA	0.392	NA	NA	NA	NA
D907_A	DNAREP1_INE-1;con4_UnFUnCl002_DHX-incomp;con4_UnFUnCl002_DHX-incomp	3L	11104225	11104495	NA	0.0075188	0.015873	NA	C-A	NA	0.614	NA	0.614	NA	NA	NA	NA
D907_A	BDGP_baggins	X	6930585	6930760	NA	0.00591716	0.00645161	NA	C-A	NA	1	NA	1	NA	NA	NA	NA
D907_A	con14_F-element	3R	20788908	20789083	NA	0.00662252	0.00444444	NA	C-A	NA	1	NA	1	NA	NA	NA	NA
D907_A	con14_F-element	X	3658129	3658304	NA	0.00487805	0.00512821	NA	C-A	NA	1	NA	1	NA	NA	NA	NA
D907_A	con25_1360	2L	8526979	8527173	NA	0.00564972	0.00371747	NA	C-A	NA	1	NA	1	NA	NA	NA	NA
D907_A	con25_1360	3L	10793346	10793521	NA	0.00552486	0.00492611	NA	C-A	NA	1	NA	1	NA	NA	NA	NA
D907_A	con33_17-6	X	5713456	5713631	NA	0.0070922	0.0044843	NA	C-A	NA	1	NA	1	NA	NA	NA	NA
D907_A	con5_Cr1a	3R	13219884	13220059	NA	0.00465116	0.00529101	NA	C-A	NA	1	NA	1	NA	NA	NA	NA
D907_A	con5_Cr1a	3R	20939186	20939361	NA	0.00598802	0.00502513	NA	C-A	NA	1	NA	1	NA	NA	NA	NA
D907_A	con15_pogo	3L	10551425	10551730	NA	0.358025	NA	1	C-N	NA	2.55e-05	NA	NA	NA	2.55e-05	NA	NA
D907_A	con15_pogo	3R	7100913	7101225	NA	0.466667	NA	0.350318	C-N	NA	0.0808	NA	NA	NA	0.0808	NA	NA
D907_A	con41_UnFmcl001_RLX-incomp	2L	11467872	11467896	NA	1	NA	1	C-N	NA	1	1	1	1	1	1	1
D907_A	BDGP_BS3	2R	6905709	6905884	NA	NA	0.00584795	NA	de_novo	NA	NA	NA	NA	NA	NA	NA	NA
D907_A	BDGP_Circe	2L	13181310	13181485	NA	NA	0.00401606	NA	de_novo	NA	NA	NA	NA	NA	NA	NA	NA
D907_A	BDGP_Circe	2R	9803642	9803817	NA	NA	0.0044843	NA	de_novo	NA	NA	NA	NA	NA	NA	NA	NA
D907_A	BDGP_Circe	3L	11202809	11202984	NA	NA	0.00478469	NA	de_novo	NA	NA	NA	NA	NA	NA	NA	NA
D907_A	BDGP_Circe	X	7117486	7117661	NA	NA	0.0044843	NA	de_novo	NA	NA	NA	NA	NA	NA	NA	NA
D907_A	BDGP_Circe	X	19686404	19686579	NA	NA	0.00414938	NA	de_novo	NA	NA	NA	NA	NA	NA	NA	NA
D907_A	BDGP_G5A	2L	8144294	8144469	NA	NA	0.0075188	NA	de_novo	NA	NA	NA	NA	NA	NA	NA	NA
D907_A	BDGP_G5A	X	15326507	15326682	NA	NA	0.0243902	NA	de_novo	NA	NA	NA	NA	NA	NA	NA	NA
D907_A	BDGP_Osvaldo	3L	17922834	17923009	NA	NA	0.00421941	NA	de_novo	NA	NA	NA	NA	NA	NA	NA	NA
D907_A	BDGP_R1A1-element	2L	7099126	7099426	NA	NA	0.0175439	NA	de_novo	NA	NA	NA	NA	NA	NA	NA	NA
D907_A	BDGP_R1A1-element	2L	7513188	7513256	NA	NA	0.00775194	NA	de_novo	NA	NA	NA	NA	NA	NA	NA	NA
D907_A	BDGP_R2-element	2R	6761843	6762018	NA	NA	0.00613497	NA	de_novo	NA	NA	NA	NA	NA	NA	NA	NA
D907_A	BDGP_R2-element	2R	22014556	22014731	NA	NA	0.00552486	NA	de_novo	NA	NA	NA	NA	NA	NA	NA	NA
D907_A	BDGP_R2-element	3L	12880936	12881111	NA	NA	0.00460829	NA	de_novo	NA	NA	NA	NA	NA	NA	NA	NA
D907_A	BDGP_R2-element	3R	24329312	24329487	NA	NA	0.00355872	NA	de_novo	NA	NA	NA	NA	NA	NA	NA	NA
D907_A	BDGP_R2-element	X	11936169	11936344	NA	NA	0.00483092	NA	de_novo	NA	NA	NA	NA	NA	NA	NA	NA
D907_A	BDGP_baggins	3R	24136364	24136539	NA	NA	0.00380228	NA	de_novo	NA	NA	NA	NA	NA	NA	NA	NA
D907_A	BDGP_baggins	3R	26269032	26269207	NA	NA	0.00411523	NA	de_novo	NA	NA	NA	NA	NA	NA	NA	NA
D907_A	BDGP_baggins	X	20061602	20061777	NA	NA	0.00408163	NA	de_novo	NA	NA	NA	NA	NA	NA	NA	NA
D907_A	BDGP_jockey2	2R	15827047	15827222	NA	NA	0.00429185	NA	de_novo	NA	NA	NA	NA	NA	NA	NA	NA
D907_A	BDGP_transib3	X	19116479	19116654	NA	NA	0.00444444	NA	de_novo	NA	NA	NA	NA	NA	NA	NA	NA
D907_A	DNAREP1_INE-1;con4_UnFUnCl002_DHX-incomp	X	15718674	15718849	NA	NA	0.00343643	NA	de_novo	NA	NA	NA	NA	NA	NA	NA	NA
D907_A	UnFUnClUnAlig_RLX-incomp_SLO	3R	16959006	16959181	NA	NA	0.00421941	NA	de_novo	NA	NA	NA	NA	NA	NA	NA	NA
D907_A	UnFUnClUnAlig_RLX-incomp_SLO	3R	25809174	25809349	NA	NA	0.00395257	NA	de_novo	NA	NA	NA	NA	NA	NA	NA	NA
D907_A	UnFUnClUnAlig_RLX-incomp_TOM	X	14654840	14655015	NA	NA	0.00540541	NA	de_novo	NA	NA	NA	NA	NA	NA	NA	NA
D907_A	UnFmclCluster039_RLX-incomp_COR	2R	14712667	14712842	NA	NA	0.00478469	NA	de_novo	NA	NA	NA	NA	NA	NA	NA	NA
D907_A	UnFmclCluster039_RLX-incomp_COR	3L	14388093	14388268	NA	NA	0.00398406	NA	de_novo	NA	NA	NA	NA	NA	NA	NA	NA
D907_A	con10_McClintock	3R	6986589	6986764	NA	NA	0.00465116	NA	de_novo	NA	NA	NA	NA	NA	NA	NA	NA
D907_A	con11_hopper	2R	24446273	24446455	NA	NA	0.00327869	NA	de_novo	NA	NA	NA	NA	NA	NA	NA	NA
D907_A	con11_hopper	3R	7303674	7303849	NA	NA	0.00628931	NA	de_novo	NA	NA	NA	NA	NA	NA	NA	NA
D907_A	con12_Doc	2L	8910329	8910504	NA	NA	0.00398406	NA	de_novo	NA	NA	NA	NA	NA	NA	NA	NA
D907_A	con12_Doc	2R	9567506	9567681	NA	NA	0.00371747	NA	de_novo	NA	NA	NA	NA	NA	NA	NA	NA
D907_A	con12_Doc	2R	12201287	12201462	NA	NA	0.00414938	NA	de_novo	NA	NA	NA	NA	NA	NA	NA	NA
D907_A	con12_Doc	2R	19646997	19647172	NA	NA	0.00487805	NA	de_novo	NA	NA	NA	NA	NA	NA	NA	NA
D907_A	con12_Doc	3R	30160427	30160602	NA	NA	0.00321543	NA	de_novo	NA	NA	NA	NA	NA	NA	NA	NA
D907_A	con12_TAHRE	2R	22923584	22923759	NA	NA	0.00369004	NA	de_novo	NA	NA	NA	NA	NA	NA	NA	NA
D907_A	con12_TAHRE	3R	14891570	14891745	NA	NA	0.00411523	NA	de_novo	NA	NA	NA	NA	NA	NA	NA	NA
D907_A	con13_UnFmcl013_RLX-incomp	2L	5722908	5723083	NA	NA	0.00395257	NA	de_novo	NA	NA	NA	NA	NA	NA	NA	NA
D907_A	con13_UnFmcl013_RLX-incomp	2L	6836912	6837087	NA	NA	0.00552486	NA	de_novo	NA	NA	NA	NA	NA	NA	NA	NA
D907_A	con13_UnFmcl013_RLX-incomp	2L	14548973	14549148	NA	NA	0.00534759	NA	de_novo	NA	NA	NA	NA	NA	NA	NA	NA
D907_A	con13_UnFmcl013_RLX-incomp	2L	17090080	17090255	NA	NA	0.00621118	NA	de_novo	NA	NA	NA	NA	NA	NA	NA	NA
D907_A	con13_UnFmcl013_RLX-incomp	2R	14033539	14033714	NA	NA	0.00452489	NA	de_novo	NA	NA	NA	NA	NA	NA	NA	NA
D907_A	con13_UnFmcl013_RLX-incomp	3L	5086194	5086369	NA	NA	0.00473934	NA	de_novo	NA	NA	NA	NA	NA	NA	NA	NA
D907_A	con13_UnFmcl013_RLX-incomp	3L	12853723	12853898	NA	NA	0.00512821	NA	de_novo	NA	NA	NA	NA	NA	NA	NA	NA
D907_A	con13_UnFmcl013_RLX-incomp	3L	14958308	14958483	NA	NA	0.00653595	NA	de_novo	NA	NA	NA	NA	NA	NA	NA	NA
D907_A	con13_UnFmcl013_RLX-incomp	3R	13669841	13670016	NA	NA	0.00613497	NA	de_novo	NA	NA	NA	NA	NA	NA	NA	NA
D907_A	con13_UnFmcl013_RLX-incomp	X	4666269	4666444	NA	NA	0.00425532	NA	de_novo	NA	NA	NA	NA	NA	NA	NA	NA
D907_A	con13_UnFmcl013_RLX-incomp	X	12995771	12995946	NA	NA	0.00529101	NA	de_novo	NA	NA	NA	NA	NA	NA	NA	NA
D907_A	con14_F-element	2L	1045956	1046131	NA	NA	0.00411523	NA	de_novo	NA	NA	NA	NA	NA	NA	NA	NA
D907_A	con14_F-element	2L	5118288	5118463	NA	NA	0.00478469	NA	de_novo	NA	NA	NA	NA	NA	NA	NA	NA
D907_A	con14_F-element	2R	9045386	9045561	NA	NA	0.00473934	NA	de_novo	NA	NA	NA	NA	NA	NA	NA	NA
D907_A	con14_F-element	2R	11796183	11796376	NA	NA	0.00970874	NA	de_novo	NA	NA	NA	NA	NA	NA	NA	NA
D907_A	con14_F-element	2R	15693506	15693681	NA	NA	0.00487805	NA	de_novo	NA	NA	NA	NA	NA	NA	NA	NA
D907_A	con14_F-element	2R	20126689	20126864	NA	NA	0.00546448	NA	de_novo	NA	NA	NA	NA	NA	NA	NA	NA
D907_A	con14_F-element	3L	2630797	2630972	NA	NA	0.00460829	NA	de_novo	NA	NA	NA	NA	NA	NA	NA	NA
D907_A	con14_F-element	3L	4768880	4769055	NA	NA	0.00401606	NA	de_novo	NA	NA	NA	NA	NA	NA	NA	NA
D907_A	con14_F-element	3L	7166941	7167116	NA	NA	0.00392157	NA	de_novo	NA	NA	NA	NA	NA	NA	NA	NA
D907_A	con14_F-element	3L	11118791	11118966	NA	NA	0.003861	NA	de_novo	NA	NA	NA	NA	NA	NA	NA	NA
D907_A	con14_F-element	3L	16365007	16365182	NA	NA	0.00369004	NA	de_novo	NA	NA	NA	NA	NA	NA	NA	NA
D907_A	con14_F-element	3L	18758212	18758387	NA	NA	0.00990099	NA	de_novo	NA	NA	NA	NA	NA	NA	NA	NA
D907_A	con14_F-element	3R	8444141	8444316	NA	NA	0.00628931	NA	de_novo	NA	NA	NA	NA	NA	NA	NA	NA
D907_A	con14_F-element	3R	15490705	15490880	NA	NA	0.00311526	NA	de_novo	NA	NA	NA	NA	NA	NA	NA	NA
D907_A	con14_F-element	3R	19261824	19261999	NA	NA	0.00456621	NA	de_novo	NA	NA	NA	NA	NA	NA	NA	NA
D907_A	con14_F-element	3R	19803863	19804038	NA	NA	0.00598802	NA	de_novo	NA	NA	NA	NA	NA	NA	NA	NA
D907_A	con14_F-element	3R	25458910	25459085	NA	NA	0.00719424	NA	de_novo	NA	NA	NA	NA	NA	NA	NA	NA
D907_A	con14_F-element	3R	31569896	31569929	NA	NA	0.00746269	NA	de_novo	NA	NA	NA	NA	NA	NA	NA	NA
D907_A	con14_F-element	X	2060811	2060986	NA	NA	0.00369004	NA	de_novo	NA	NA	NA	NA	NA	NA	NA	NA
D907_A	con14_F-element	X	7838536	7838711	NA	NA	0.004329	NA	de_novo	NA	NA	NA	NA	NA	NA	NA	NA
D907_A	con14_F-element	X	10300503	10300678	NA	NA	0.00546448	NA	de_novo	NA	NA	NA	NA	NA	NA	NA	NA
D907_A	con14_F-element	X	19716806	19716981	NA	NA	0.00671141	NA	de_novo	NA	NA	NA	NA	NA	NA	NA	NA
D907_A	con14_Juan	2L	2351981	2352156	NA	NA	0.00380228	NA	de_novo	NA	NA	NA	NA	NA	NA	NA	NA
D907_A	con15_Rt1b	2L	5751507	5751682	NA	NA	0.00465116	NA	de_novo	NA	NA	NA	NA	NA	NA	NA	NA
D907_A	con15_Rt1b	2R	16576137	16576312	NA	NA	0.00401606	NA	de_novo	NA	NA	NA	NA	NA	NA	NA	NA
D907_A	con15_Rt1b	3R	9941240	9941415	NA	NA	0.00584795	NA	de_novo	NA	NA	NA	NA	NA	NA	NA	NA
D907_A	con15_Rt1b	3R	24669277	24669452	NA	NA	0.00564972	NA	de_novo	NA	NA	NA	NA	NA	NA	NA	NA
D907_A	con15_Rt1b	3R	31565625	31565800	NA	NA	0.00534759	NA	de_novo	NA	NA	NA	NA	NA	NA	NA	NA
D907_A	con15_Rt1b	X	3348855	3349030	NA	NA	0.00671141	NA	de_novo	NA	NA	NA	NA	NA	NA	NA	NA
D907_A	con15_flea	2L	3362007	3362182	NA	NA	0.00628931	NA	de_novo	NA	NA	NA	NA	NA	NA	NA	NA
D907_A	con15_flea	3L	1854733	1854908	NA	NA	0.0044843	NA	de_novo	NA	NA	NA	NA	NA	NA	NA	NA
D907_A	con15_flea	3L	12812606	12812781	NA	NA	0.00380228	NA	de_novo	NA	NA	NA	NA	NA	NA	NA	NA
D907_A	con15_pogo	3L	15133196	15133371	NA	NA	0.00401606	NA	de_novo	NA	NA	NA	NA	NA	NA	NA	NA
D907_A	con16_blood	2R	12448085	12448260	NA	NA	0.003861	NA	de_novo	NA	NA	NA	NA	NA	NA	NA	NA
D907_A	con16_blood	3L	10763264	10763439	NA	NA	0.0044843	NA	de_novo	NA	NA	NA	NA	NA	NA	NA	NA
D907_A	con16_blood	3R	9239704	9239879	NA	NA	0.00411523	NA	de_novo	NA	NA	NA	NA	NA	NA	NA	NA
D907_A	con16_blood	3R	12078793	12078968	NA	NA	0.0102041	NA	de_novo	NA	NA	NA	NA	NA	NA	NA	NA
D907_A	con16_blood	3R	19048770	19048945	NA	NA	0.00444444	NA	de_novo	NA	NA	NA	NA	NA	NA	NA	NA
D907_A	con17_invader3	2L	5161130	5161305	NA	NA	0.00408163	NA	de_novo	NA	NA	NA	NA	NA	NA	NA	NA
D907_A	con19_Quasimodo	2R	17057278	17057453	NA	NA	0.00383142	NA	de_novo	NA	NA	NA	NA	NA	NA	NA	NA
D907_A	con19_Quasimodo	3L	4547914	4548089	NA	NA	0.0044843	NA	de_novo	NA	NA	NA	NA	NA	NA	NA	NA
D907_A	con19_Quasimodo	3R	19547638	19547818	NA	NA	0.00529101	NA	de_novo	NA	NA	NA	NA	NA	NA	NA	NA
D907_A	con19_Quasimodo	X	21028475	21028650	NA	NA	0.00653595	NA	de_novo	NA	NA	NA	NA	NA	NA	NA	NA
D907_A	con20_Burdock	2L	13968656	13968831	NA	NA	0.00392157	NA	de_novo	NA	NA	NA	NA	NA	NA	NA	NA
D907_A	con20_Burdock	3R	28217089	28217264	NA	NA	0.00636943	NA	de_novo	NA	NA	NA	NA	NA	NA	NA	NA
D907_A	con20_jockey	2L	546260	546435	NA	NA	0.00374532	NA	de_novo	NA	NA	NA	NA	NA	NA	NA	NA
D907_A	con20_jockey	2L	9872334	9872509	NA	NA	0.00425532	NA	de_novo	NA	NA	NA	NA	NA	NA	NA	NA
D907_A	con20_jockey	2R	8921073	8921263	NA	NA	0.00740741	NA	de_novo	NA	NA	NA	NA	NA	NA	NA	NA
D907_A	con20_jockey	2R	16389928	16389941	NA	NA	0.0769231	NA	de_novo	NA	NA	NA	NA	NA	NA	NA	NA
D907_A	con20_jockey	2R	21844401	21844413	NA	NA	0.372263	NA	de_novo	NA	NA	NA	NA	NA	NA	NA	NA
D907_A	con20_jockey	2R	23106483	23106501	NA	NA	0.0697674	NA	de_novo	NA	NA	NA	NA	NA	NA	NA	NA
D907_A	con20_jockey	3L	10395413	10395426	NA	NA	0.0328638	NA	de_novo	NA	NA	NA	NA	NA	NA	NA	NA
D907_A	con20_jockey	3L	13361659	13361669	NA	NA	0.0798122	NA	de_novo	NA	NA	NA	NA	NA	NA	NA	NA
D907_A	con20_jockey	3R	8024333	8024508	NA	NA	0.00371747	NA	de_novo	NA	NA	NA	NA	NA	NA	NA	NA
D907_A	con20_jockey	3R	14132148	14132323	NA	NA	0.00401606	NA	de_novo	NA	NA	NA	NA	NA	NA	NA	NA
D907_A	con20_jockey	3R	20002329	20002504	NA	NA	0.00452489	NA	de_novo	NA	NA	NA	NA	NA	NA	NA	NA
D907_A	con20_jockey	3R	22886251	22886502	NA	NA	0.00862069	NA	de_novo	NA	NA	NA	NA	NA	NA	NA	NA
D907_A	con20_jockey	3R	30091416	30091591	NA	NA	0.00452489	NA	de_novo	NA	NA	NA	NA	NA	NA	NA	NA
D907_A	con20_jockey	3R	31461221	31461249	NA	NA	0.00990099	NA	de_novo	NA	NA	NA	NA	NA	NA	NA	NA
D907_A	con20_jockey	X	16686406	16686581	NA	NA	0.00348432	NA	de_novo	NA	NA	NA	NA	NA	NA	NA	NA
D907_A	con21_Ivk	3R	11549414	11549589	NA	NA	0.00456621	NA	de_novo	NA	NA	NA	NA	NA	NA	NA	NA
D907_A	con23_copia	2R	15720913	15721088	NA	NA	0.00452489	NA	de_novo	NA	NA	NA	NA	NA	NA	NA	NA
D907_A	con23_copia	3L	905059	905234	NA	NA	0.00613497	NA	de_novo	NA	NA	NA	NA	NA	NA	NA	NA
D907_A	con23_copia	3R	16906477	16906652	NA	NA	0.00456621	NA	de_novo	NA	NA	NA	NA	NA	NA	NA	NA
D907_A	con24_Transpac	3R	29618470	29618645	NA	NA	0.00487805	NA	de_novo	NA	NA	NA	NA	NA	NA	NA	NA
D907_A	con24_Transpac	X	8241930	8242105	NA	NA	0.00380228	NA	de_novo	NA	NA	NA	NA	NA	NA	NA	NA
D907_A	con24_Transpac	X	18580040	18580215	NA	NA	0.00564972	NA	de_novo	NA	NA	NA	NA	NA	NA	NA	NA
D907_A	con24_UnFmcl003_noCat	3L	4629831	4630006	NA	NA	0.00487805	NA	de_novo	NA	NA	NA	NA	NA	NA	NA	NA
D907_A	con24_UnFmcl003_noCat	3R	10649888	10650063	NA	NA	0.00377358	NA	de_novo	NA	NA	NA	NA	NA	NA	NA	NA
D907_A	con24_UnFmcl003_noCat	3R	26204393	26204568	NA	NA	0.00444444	NA	de_novo	NA	NA	NA	NA	NA	NA	NA	NA
D907_A	con24_X-element	2R	12834963	12835138	NA	NA	0.00507614	NA	de_novo	NA	NA	NA	NA	NA	NA	NA	NA
D907_A	con24_X-element	2R	19902316	19902491	NA	NA	0.00478469	NA	de_novo	NA	NA	NA	NA	NA	NA	NA	NA
D907_A	con24_X-element	3L	18828678	18828853	NA	NA	0.0075188	NA	de_novo	NA	NA	NA	NA	NA	NA	NA	NA
D907_A	con24_X-element	3R	17812184	17812359	NA	NA	0.00598802	NA	de_novo	NA	NA	NA	NA	NA	NA	NA	NA
D907_A	con25_1360	2L	4660255	4660430	NA	NA	0.00456621	NA	de_novo	NA	NA	NA	NA	NA	NA	NA	NA
D907_A	con25_1360	2L	6321133	6321308	NA	NA	0.00606061	NA	de_novo	NA	NA	NA	NA	NA	NA	NA	NA
D907_A	con25_1360	2R	10823802	10823977	NA	NA	0.00497512	NA	de_novo	NA	NA	NA	NA	NA	NA	NA	NA
D907_A	con25_1360	2R	16000240	16000415	NA	NA	0.00465116	NA	de_novo	NA	NA	NA	NA	NA	NA	NA	NA
D907_A	con25_1360	2R	19208009	19208184	NA	NA	0.00473934	NA	de_novo	NA	NA	NA	NA	NA	NA	NA	NA
D907_A	con25_1360	2R	21612925	21613100	NA	NA	0.00425532	NA	de_novo	NA	NA	NA	NA	NA	NA	NA	NA
D907_A	con25_1360	3L	7566049	7566224	NA	NA	0.00414938	NA	de_novo	NA	NA	NA	NA	NA	NA	NA	NA
D907_A	con25_1360	3L	9586017	9586192	NA	NA	0.00478469	NA	de_novo	NA	NA	NA	NA	NA	NA	NA	NA
D907_A	con25_1360	3L	10717744	10717919	NA	NA	0.00653595	NA	de_novo	NA	NA	NA	NA	NA	NA	NA	NA
D907_A	con25_1360	3L	17344340	17344515	NA	NA	0.00404858	NA	de_novo	NA	NA	NA	NA	NA	NA	NA	NA
D907_A	con25_1360	3R	7501194	7501369	NA	NA	0.004329	NA	de_novo	NA	NA	NA	NA	NA	NA	NA	NA
D907_A	con25_1360	3R	14570493	14570668	NA	NA	0.00546448	NA	de_novo	NA	NA	NA	NA	NA	NA	NA	NA
D907_A	con25_1360	3R	19272328	19272503	NA	NA	0.00598802	NA	de_novo	NA	NA	NA	NA	NA	NA	NA	NA
D907_A	con25_1360	3R	19752057	19752232	NA	NA	0.00469484	NA	de_novo	NA	NA	NA	NA	NA	NA	NA	NA
D907_A	con25_1360	3R	21890625	21890800	NA	NA	0.00534759	NA	de_novo	NA	NA	NA	NA	NA	NA	NA	NA
D907_A	con25_1360	3R	31189643	31189818	NA	NA	0.0044843	NA	de_novo	NA	NA	NA	NA	NA	NA	NA	NA
D907_A	con25_1360	X	12684584	12684759	NA	NA	0.00662252	NA	de_novo	NA	NA	NA	NA	NA	NA	NA	NA
D907_A	con25_1360	X	14475329	14475504	NA	NA	0.00460829	NA	de_novo	NA	NA	NA	NA	NA	NA	NA	NA
D907_A	con26_BS	2L	2303509	2303684	NA	NA	0.00877193	NA	de_novo	NA	NA	NA	NA	NA	NA	NA	NA
D907_A	con26_BS	2L	10143636	10143811	NA	NA	0.00429185	NA	de_novo	NA	NA	NA	NA	NA	NA	NA	NA
D907_A	con26_BS	2R	9718656	9718831	NA	NA	0.00465116	NA	de_novo	NA	NA	NA	NA	NA	NA	NA	NA
D907_A	con26_BS	2R	19047438	19047613	NA	NA	0.00584795	NA	de_novo	NA	NA	NA	NA	NA	NA	NA	NA
D907_A	con26_BS	3R	14265305	14265480	NA	NA	0.00502513	NA	de_novo	NA	NA	NA	NA	NA	NA	NA	NA
D907_A	con26_BS	3R	17388019	17388194	NA	NA	0.00502513	NA	de_novo	NA	NA	NA	NA	NA	NA	NA	NA
D907_A	con26_BS	3R	18499940	18500115	NA	NA	0.00645161	NA	de_novo	NA	NA	NA	NA	NA	NA	NA	NA
D907_A	con26_Tirant	2R	24510308	24510483	NA	NA	0.00444444	NA	de_novo	NA	NA	NA	NA	NA	NA	NA	NA
D907_A	con2_NOF	2R	15523141	15523316	NA	NA	0.00452489	NA	de_novo	NA	NA	NA	NA	NA	NA	NA	NA
D907_A	con2_NOF	3L	1570595	1570770	NA	NA	0.0070922	NA	de_novo	NA	NA	NA	NA	NA	NA	NA	NA
D907_A	con2_NOF	3R	15799939	15800114	NA	NA	0.00398406	NA	de_novo	NA	NA	NA	NA	NA	NA	NA	NA
D907_A	con2_NOF	3R	29467710	29467885	NA	NA	0.00552486	NA	de_novo	NA	NA	NA	NA	NA	NA	NA	NA
D907_A	con2_NOF	X	1866983	1867158	NA	NA	0.00343643	NA	de_novo	NA	NA	NA	NA	NA	NA	NA	NA
D907_A	con2_UnFUnCl003_RLX-incomp	2L	4218071	4218246	NA	NA	0.00401606	NA	de_novo	NA	NA	NA	NA	NA	NA	NA	NA
D907_A	con2_UnFUnCl003_RLX-incomp	2R	22459070	22459245	NA	NA	0.00469484	NA	de_novo	NA	NA	NA	NA	NA	NA	NA	NA
D907_A	con2_diver2	2R	8165891	8166066	NA	NA	0.00436681	NA	de_novo	NA	NA	NA	NA	NA	NA	NA	NA
D907_A	con2_diver2	3R	8004755	8004930	NA	NA	0.00392157	NA	de_novo	NA	NA	NA	NA	NA	NA	NA	NA
D907_A	con2_diver2	3R	8499067	8499242	NA	NA	0.00440529	NA	de_novo	NA	NA	NA	NA	NA	NA	NA	NA
D907_A	con2_diver2	X	15673402	15673577	NA	NA	0.00440529	NA	de_novo	NA	NA	NA	NA	NA	NA	NA	NA
D907_A	con33_17-6	2L	1650935	1651110	NA	NA	0.00408163	NA	de_novo	NA	NA	NA	NA	NA	NA	NA	NA
D907_A	con33_17-6	2L	8966888	8967063	NA	NA	0.00534759	NA	de_novo	NA	NA	NA	NA	NA	NA	NA	NA
D907_A	con33_17-6	3R	8353853	8354028	NA	NA	0.00917431	NA	de_novo	NA	NA	NA	NA	NA	NA	NA	NA
D907_A	con33_17-6	3R	12263107	12263282	NA	NA	0.00558659	NA	de_novo	NA	NA	NA	NA	NA	NA	NA	NA
D907_A	con33_17-6	3R	22200631	22200806	NA	NA	0.00421941	NA	de_novo	NA	NA	NA	NA	NA	NA	NA	NA
D907_A	con33_17-6	3R	22828544	22828719	NA	NA	0.00512821	NA	de_novo	NA	NA	NA	NA	NA	NA	NA	NA
D907_A	con33_17-6	X	17185998	17186173	NA	NA	0.00680272	NA	de_novo	NA	NA	NA	NA	NA	NA	NA	NA
D907_A	con33_17-6	X	21292638	21292813	NA	NA	0.00653595	NA	de_novo	NA	NA	NA	NA	NA	NA	NA	NA
D907_A	con3_G4	2L	5663325	5663500	NA	NA	0.0044843	NA	de_novo	NA	NA	NA	NA	NA	NA	NA	NA
D907_A	con3_G4	X	4253818	4253993	NA	NA	0.00497512	NA	de_novo	NA	NA	NA	NA	NA	NA	NA	NA
D907_A	con3_G6b	X	16432639	16432814	NA	NA	0.0044843	NA	de_novo	NA	NA	NA	NA	NA	NA	NA	NA
D907_A	con3_Porto1	3L	9914579	9914754	NA	NA	0.00452489	NA	de_novo	NA	NA	NA	NA	NA	NA	NA	NA
D907_A	con3_Porto1	3R	24409520	24409695	NA	NA	0.00571429	NA	de_novo	NA	NA	NA	NA	NA	NA	NA	NA
D907_A	con3_Tc1-2	X	2470729	2470904	NA	NA	0.00621118	NA	de_novo	NA	NA	NA	NA	NA	NA	NA	NA
D907_A	con3_Tc1-2	X	6429091	6429266	NA	NA	0.00699301	NA	de_novo	NA	NA	NA	NA	NA	NA	NA	NA
D907_A	con41_UnFmcl001_RLX-incomp	2L	5782804	5782928	NA	NA	0.00934579	NA	de_novo	NA	NA	NA	NA	NA	NA	NA	NA
D907_A	con41_UnFmcl001_RLX-incomp	2R	9068124	9068299	NA	NA	0.00425532	NA	de_novo	NA	NA	NA	NA	NA	NA	NA	NA
D907_A	con41_UnFmcl001_RLX-incomp	2R	13939546	13939553	NA	NA	0.0422535	NA	de_novo	NA	NA	NA	NA	NA	NA	NA	NA
D907_A	con41_UnFmcl001_RLX-incomp	3L	2940238	2940245	NA	NA	0.352941	NA	de_novo	NA	NA	NA	NA	NA	NA	NA	NA
D907_A	con41_UnFmcl001_RLX-incomp	3L	15666294	15666469	NA	NA	0.003861	NA	de_novo	NA	NA	NA	NA	NA	NA	NA	NA
D907_A	con41_UnFmcl001_RLX-incomp	3R	9461894	9462069	NA	NA	0.00645161	NA	de_novo	NA	NA	NA	NA	NA	NA	NA	NA
D907_A	con41_UnFmcl001_RLX-incomp	3R	21472020	21472195	NA	NA	0.00689655	NA	de_novo	NA	NA	NA	NA	NA	NA	NA	NA
D907_A	con41_UnFmcl001_RLX-incomp	X	4699343	4699348	NA	NA	0.12987	NA	de_novo	NA	NA	NA	NA	NA	NA	NA	NA
D907_A	con41_UnFmcl001_RLX-incomp	X	8397356	8397531	NA	NA	0.00689655	NA	de_novo	NA	NA	NA	NA	NA	NA	NA	NA
D907_A	con41_UnFmcl001_RLX-incomp	X	8983438	8983613	NA	NA	0.00854701	NA	de_novo	NA	NA	NA	NA	NA	NA	NA	NA
D907_A	con41_UnFmcl001_RLX-incomp	X	15106037	15106044	NA	NA	0.138686	NA	de_novo	NA	NA	NA	NA	NA	NA	NA	NA
D907_A	con41_UnFmcl001_RLX-incomp	X	17949443	17949618	NA	NA	0.0117647	NA	de_novo	NA	NA	NA	NA	NA	NA	NA	NA
D907_A	con41_UnFmcl001_RLX-incomp	X	18842142	18842317	NA	NA	0.00401606	NA	de_novo	NA	NA	NA	NA	NA	NA	NA	NA
D907_A	con43_H	3R	17166366	17166541	NA	NA	0.004329	NA	de_novo	NA	NA	NA	NA	NA	NA	NA	NA
D907_A	con43_H	3R	18603349	18603524	NA	NA	0.00383142	NA	de_novo	NA	NA	NA	NA	NA	NA	NA	NA
D907_A	con43_H	X	7069435	7069610	NA	NA	0.00552486	NA	de_novo	NA	NA	NA	NA	NA	NA	NA	NA
D907_A	con45_Tabor	2R	12905381	12905556	NA	NA	0.00546448	NA	de_novo	NA	NA	NA	NA	NA	NA	NA	NA
D907_A	con46_297	2L	15294809	15294984	NA	NA	0.00456621	NA	de_novo	NA	NA	NA	NA	NA	NA	NA	NA
D907_A	con46_297	2R	7310774	7310949	NA	NA	0.00404858	NA	de_novo	NA	NA	NA	NA	NA	NA	NA	NA
D907_A	con46_297	3R	28451652	28451827	NA	NA	0.00421941	NA	de_novo	NA	NA	NA	NA	NA	NA	NA	NA
D907_A	con46_297	3R	28818189	28818364	NA	NA	0.00350877	NA	de_novo	NA	NA	NA	NA	NA	NA	NA	NA
D907_A	con46_297	X	7988892	7989067	NA	NA	0.00990099	NA	de_novo	NA	NA	NA	NA	NA	NA	NA	NA
D907_A	con48_412	2L	5345985	5346160	NA	NA	0.00321543	NA	de_novo	NA	NA	NA	NA	NA	NA	NA	NA
D907_A	con48_412	3L	14005839	14006014	NA	NA	0.00478469	NA	de_novo	NA	NA	NA	NA	NA	NA	NA	NA
D907_A	con48_412	X	2882447	2882622	NA	NA	0.00452489	NA	de_novo	NA	NA	NA	NA	NA	NA	NA	NA
D907_A	con48_412	X	17219668	17219843	NA	NA	0.008	NA	de_novo	NA	NA	NA	NA	NA	NA	NA	NA
D907_A	con48_roo	2R	7595743	7596052	NA	NA	0.0104167	NA	de_novo	NA	NA	NA	NA	NA	NA	NA	NA
D907_A	con48_roo	2R	10483756	10483982	NA	NA	0.00806452	NA	de_novo	NA	NA	NA	NA	NA	NA	NA	NA
D907_A	con48_roo	2R	14060375	14060550	NA	NA	0.00492611	NA	de_novo	NA	NA	NA	NA	NA	NA	NA	NA
D907_A	con48_roo	3L	4097162	4097168	NA	NA	0.0423729	NA	de_novo	NA	NA	NA	NA	NA	NA	NA	NA
D907_A	con48_roo	3L	11801828	11802003	NA	NA	0.00934579	NA	de_novo	NA	NA	NA	NA	NA	NA	NA	NA
D907_A	con48_roo	3L	15295408	15295583	NA	NA	0.00529101	NA	de_novo	NA	NA	NA	NA	NA	NA	NA	NA
D907_A	con48_roo	3R	7774850	7775025	NA	NA	0.00478469	NA	de_novo	NA	NA	NA	NA	NA	NA	NA	NA
D907_A	con48_roo	3R	9360191	9360534	NA	NA	0.00990099	NA	de_novo	NA	NA	NA	NA	NA	NA	NA	NA
D907_A	con48_roo	3R	11862431	11862606	NA	NA	0.00429185	NA	de_novo	NA	NA	NA	NA	NA	NA	NA	NA
D907_A	con48_roo	3R	21598064	21598090	NA	NA	0.0344828	NA	de_novo	NA	NA	NA	NA	NA	NA	NA	NA
D907_A	con48_roo	3R	28835245	28835420	NA	NA	0.00598802	NA	de_novo	NA	NA	NA	NA	NA	NA	NA	NA
D907_A	con48_roo	X	2484586	2484591	NA	NA	0.10101	NA	de_novo	NA	NA	NA	NA	NA	NA	NA	NA
D907_A	con48_roo	X	9289009	9289026	NA	NA	0.0561798	NA	de_novo	NA	NA	NA	NA	NA	NA	NA	NA
D907_A	con4_Doc2	2R	9957050	9957225	NA	NA	0.0136986	NA	de_novo	NA	NA	NA	NA	NA	NA	NA	NA
D907_A	con4_Doc2	X	17509655	17509721	NA	NA	0.01	NA	de_novo	NA	NA	NA	NA	NA	NA	NA	NA
D907_A	con4_G-element	2L	17679864	17680039	NA	NA	0.00606061	NA	de_novo	NA	NA	NA	NA	NA	NA	NA	NA
D907_A	con4_GATEa	2L	2361979	2362154	NA	NA	0.00444444	NA	de_novo	NA	NA	NA	NA	NA	NA	NA	NA
D907_A	con4_GATEa	2L	17010330	17010505	NA	NA	0.00628931	NA	de_novo	NA	NA	NA	NA	NA	NA	NA	NA
D907_A	con4_GATEa	2R	7088381	7088556	NA	NA	0.00353357	NA	de_novo	NA	NA	NA	NA	NA	NA	NA	NA
D907_A	con4_GATEa	2R	7930543	7930718	NA	NA	0.00401606	NA	de_novo	NA	NA	NA	NA	NA	NA	NA	NA
D907_A	con4_GATEa	3R	6987964	6988139	NA	NA	0.00395257	NA	de_novo	NA	NA	NA	NA	NA	NA	NA	NA
D907_A	con4_UnFUnCl002_DHX-incomp	2L	9182548	9182723	NA	NA	0.00552486	NA	de_novo	NA	NA	NA	NA	NA	NA	NA	NA
D907_A	con4_UnFUnCl002_DHX-incomp	3L	5743028	5743203	NA	NA	0.00558659	NA	de_novo	NA	NA	NA	NA	NA	NA	NA	NA
D907_A	con5_Cr1a	2L	14537043	14537218	NA	NA	0.00456621	NA	de_novo	NA	NA	NA	NA	NA	NA	NA	NA
D907_A	con5_Cr1a	2R	7340596	7340771	NA	NA	0.00401606	NA	de_novo	NA	NA	NA	NA	NA	NA	NA	NA
D907_A	con5_Cr1a	2R	8266362	8266537	NA	NA	0.00465116	NA	de_novo	NA	NA	NA	NA	NA	NA	NA	NA
D907_A	con5_Cr1a	2R	11503342	11503517	NA	NA	0.00395257	NA	de_novo	NA	NA	NA	NA	NA	NA	NA	NA
D907_A	con5_Cr1a	3L	6349678	6349853	NA	NA	0.00408163	NA	de_novo	NA	NA	NA	NA	NA	NA	NA	NA
D907_A	con5_Cr1a	3R	12928737	12928912	NA	NA	0.00558659	NA	de_novo	NA	NA	NA	NA	NA	NA	NA	NA
D907_A	con5_Cr1a	X	4745608	4745783	NA	NA	0.00512821	NA	de_novo	NA	NA	NA	NA	NA	NA	NA	NA
D907_A	con5_Cr1a	X	16626384	16626559	NA	NA	0.00440529	NA	de_novo	NA	NA	NA	NA	NA	NA	NA	NA
D907_A	con7_Dm88	3L	5076547	5076722	NA	NA	0.00518135	NA	de_novo	NA	NA	NA	NA	NA	NA	NA	NA
D907_A	con7_Stalker4	3L	15166508	15166683	NA	NA	0.00421941	NA	de_novo	NA	NA	NA	NA	NA	NA	NA	NA
D907_A	con7_UnFmcl002_RXX-LARD	2L	1913131	1913306	NA	NA	0.0162162	NA	de_novo	NA	NA	NA	NA	NA	NA	NA	NA
D907_A	con7_UnFmcl002_RXX-LARD	2L	11171573	11171748	NA	NA	0.00497512	NA	de_novo	NA	NA	NA	NA	NA	NA	NA	NA
D907_A	con7_UnFmcl002_RXX-LARD	2R	6596060	6596235	NA	NA	0.00657895	NA	de_novo	NA	NA	NA	NA	NA	NA	NA	NA
D907_A	con7_UnFmcl002_RXX-LARD	3R	7137802	7137977	NA	NA	0.00478469	NA	de_novo	NA	NA	NA	NA	NA	NA	NA	NA
D907_A	con8_G2	3R	8170132	8170307	NA	NA	0.003861	NA	de_novo	NA	NA	NA	NA	NA	NA	NA	NA
D907_A	con8_G2	3R	13561986	13562161	NA	NA	0.00613497	NA	de_novo	NA	NA	NA	NA	NA	NA	NA	NA
D907_A	con8_G2	3R	15430521	15430696	NA	NA	0.00429185	NA	de_novo	NA	NA	NA	NA	NA	NA	NA	NA
D907_A	con8_G2	3R	30570107	30570282	NA	NA	0.00444444	NA	de_novo	NA	NA	NA	NA	NA	NA	NA	NA
D907_A	con8_G2	X	1460328	1460503	NA	NA	0.00353357	NA	de_novo	NA	NA	NA	NA	NA	NA	NA	NA
D907_A	con8_UnFmcl025_RLX-comp	2L	11526571	11526746	NA	NA	0.00529101	NA	de_novo	NA	NA	NA	NA	NA	NA	NA	NA
D907_A	con8_gypsy4	2L	15422363	15422391	NA	NA	0.0102041	NA	de_novo	NA	NA	NA	NA	NA	NA	NA	NA
D907_A	con9_Bari1	3R	8051813	8051988	NA	NA	0.00512821	NA	de_novo	NA	NA	NA	NA	NA	NA	NA	NA
D907_A	con9_Bari1	3R	8186836	8187011	NA	NA	0.00327869	NA	de_novo	NA	NA	NA	NA	NA	NA	NA	NA
D907_A	con9_Bari1	3R	8422524	8422699	NA	NA	0.00425532	NA	de_novo	NA	NA	NA	NA	NA	NA	NA	NA
D907_A	con2_NOF	X	2745003	2745375	NA	NA	0.319149	0.010101	A-N	NA	6.4e-09	6.4e-09	NA	NA	NA	NA	NA
D907_A	con2_NOF	3R	8929472	8929850	NA	NA	0.253731	0.418182	A-N	NA	0.0274	0.0274	NA	NA	NA	NA	NA
D907_A	con3_G6b;con7_G6a;con7_G6a	2R	6488848	6490881	NA	NA	0.0215827	0.0364964	A-N	NA	0.719	0.719	NA	NA	NA	NA	NA
D907_A	con15_Rt1b	2R	20146145	20146320	NA	NA	0.00421941	0.00478469	A-N	NA	1	1	NA	NA	NA	NA	NA
D907_A	con20_jockey	3L	4432541	4432716	NA	NA	0.00540541	0.00564972	A-N	NA	1	1	NA	NA	NA	NA	NA
D907_A	con48_roo	X	18049810	18049993	NA	NA	1	1	A-N	NA	1	1	NA	NA	NA	NA	NA
D907_A	DNAREP1_INE-1;con7_Dbuz-INE-1	X	15841210	15841619	NA	0.00584795	NA	NA	C	NA	NA	NA	NA	NA	NA	NA	NA
D907_A	DNAREP1_INE-1;con7_Dbuz-INE-1	X	21004448	21004934	NA	0.00465116	NA	NA	C	NA	NA	NA	NA	NA	NA	NA	NA
D907_A	con15_pogo	3R	29760413	29761560	NA	0.0044843	NA	NA	C	NA	NA	NA	NA	NA	NA	NA	NA
D907_A	con3_G4	3R	7080694	7081436	NA	0.0052356	NA	NA	C	NA	NA	NA	NA	NA	NA	NA	NA
D907_A	con43_H	2L	12262549	12262626	NA	0.00719424	NA	NA	C	NA	NA	NA	NA	NA	NA	NA	NA
D907_A	con7_UnFmcl002_RXX-LARD	X	5502640	5503383	NA	0.0044843	NA	NA	C	NA	NA	NA	NA	NA	NA	NA	NA
D907_A	con11_hopper	3L	4782274	4782464	1	NA	NA	NA	P0	NA	NA	NA	NA	NA	NA	NA	NA
D907_A	con14_Juan	3L	2991333	2991466	0.252525	NA	NA	NA	P0	NA	NA	NA	NA	NA	NA	NA	NA
D907_A	BDGP_BS3	3R	30156090	30156265	NA	NA	0.004329	NA	de_novo_not_considered	NA	NA	NA	NA	NA	NA	NA	NA
D907_A	BDGP_Circe	2L	3095849	3096024	NA	NA	0.00440529	NA	de_novo_not_considered	NA	NA	NA	NA	NA	NA	NA	NA
D907_A	BDGP_G5	X	20511845	20512020	NA	NA	0.003663	NA	de_novo_not_considered	NA	NA	NA	NA	NA	NA	NA	NA
D907_A	BDGP_R2-element	2L	9874620	9874795	NA	NA	0.00584795	NA	de_novo_not_considered	NA	NA	NA	NA	NA	NA	NA	NA
D907_A	BDGP_R2-element	3R	18937531	18937706	NA	NA	0.00369004	NA	de_novo_not_considered	NA	NA	NA	NA	NA	NA	NA	NA
D907_A	BDGP_R2-element	X	6957923	6958098	NA	NA	0.00564972	NA	de_novo_not_considered	NA	NA	NA	NA	NA	NA	NA	NA
D907_A	BDGP_R2-element	X	15421178	15421353	NA	NA	0.00444444	NA	de_novo_not_considered	NA	NA	NA	NA	NA	NA	NA	NA
D907_A	BDGP_baggins	3R	7476797	7476972	NA	NA	0.00578035	NA	de_novo_not_considered	NA	NA	NA	NA	NA	NA	NA	NA
D907_A	UnFmclCluster039_RLX-incomp_COR	3R	26917896	26918071	NA	NA	0.00598802	NA	de_novo_not_considered	NA	NA	NA	NA	NA	NA	NA	NA
D907_A	con11_hopper	2R	8919839	8920014	NA	NA	0.00414938	NA	de_novo_not_considered	NA	NA	NA	NA	NA	NA	NA	NA
D907_A	con12_Doc	3L	1928855	1929030	NA	NA	0.00425532	NA	de_novo_not_considered	NA	NA	NA	NA	NA	NA	NA	NA
D907_A	con12_Doc	3L	4300766	4300941	NA	NA	0.00460829	NA	de_novo_not_considered	NA	NA	NA	NA	NA	NA	NA	NA
D907_A	con12_Doc	3L	10549017	10549192	NA	NA	0.00469484	NA	de_novo_not_considered	NA	NA	NA	NA	NA	NA	NA	NA
D907_A	con12_Doc	X	14171453	14171628	NA	NA	0.00502513	NA	de_novo_not_considered	NA	NA	NA	NA	NA	NA	NA	NA
D907_A	con12_TAHRE	3R	10287446	10287621	NA	NA	0.00578035	NA	de_novo_not_considered	NA	NA	NA	NA	NA	NA	NA	NA
D907_A	con12_TAHRE	X	2961685	2961860	NA	NA	0.0044843	NA	de_novo_not_considered	NA	NA	NA	NA	NA	NA	NA	NA
D907_A	con14_F-element	2L	16004538	16004713	NA	NA	0.00564972	NA	de_novo_not_considered	NA	NA	NA	NA	NA	NA	NA	NA
D907_A	con14_F-element	2R	21251172	21251347	NA	NA	0.00628931	NA	de_novo_not_considered	NA	NA	NA	NA	NA	NA	NA	NA
D907_A	con14_F-element	2R	21300714	21300889	NA	NA	0.00421941	NA	de_novo_not_considered	NA	NA	NA	NA	NA	NA	NA	NA
D907_A	con14_F-element	3L	3688158	3688333	NA	NA	0.00436681	NA	de_novo_not_considered	NA	NA	NA	NA	NA	NA	NA	NA
D907_A	con14_F-element	3R	12102856	12103031	NA	NA	0.00529101	NA	de_novo_not_considered	NA	NA	NA	NA	NA	NA	NA	NA
D907_A	con15_Rt1b	2L	5453762	5453937	NA	NA	0.00497512	NA	de_novo_not_considered	NA	NA	NA	NA	NA	NA	NA	NA
D907_A	con15_Rt1b	3R	22456074	22456249	NA	NA	0.00483092	NA	de_novo_not_considered	NA	NA	NA	NA	NA	NA	NA	NA
D907_A	con19_Quasimodo	3R	14465358	14465533	NA	NA	0.00546448	NA	de_novo_not_considered	NA	NA	NA	NA	NA	NA	NA	NA
D907_A	con20_jockey	2R	22971832	22971961	NA	NA	1	NA	de_novo_not_considered	NA	NA	NA	NA	NA	NA	NA	NA
D907_A	con20_jockey	3R	17381142	17381317	NA	NA	0.00460829	NA	de_novo_not_considered	NA	NA	NA	NA	NA	NA	NA	NA
D907_A	con24_Transpac	3L	13413095	13413270	NA	NA	0.00518135	NA	de_novo_not_considered	NA	NA	NA	NA	NA	NA	NA	NA
D907_A	con24_UnFmcl003_noCat	3R	15673126	15673301	NA	NA	0.00389105	NA	de_novo_not_considered	NA	NA	NA	NA	NA	NA	NA	NA
D907_A	con24_X-element	2L	17447433	17447608	NA	NA	0.00653595	NA	de_novo_not_considered	NA	NA	NA	NA	NA	NA	NA	NA
D907_A	con24_X-element	3L	14367223	14367398	NA	NA	0.0041841	NA	de_novo_not_considered	NA	NA	NA	NA	NA	NA	NA	NA
D907_A	con25_1360	3L	1503027	1503202	NA	NA	0.00598802	NA	de_novo_not_considered	NA	NA	NA	NA	NA	NA	NA	NA
D907_A	con26_BS	2L	3719913	3720088	NA	NA	0.00487805	NA	de_novo_not_considered	NA	NA	NA	NA	NA	NA	NA	NA
D907_A	con26_Tirant	3L	8459674	8459849	NA	NA	0.00371747	NA	de_novo_not_considered	NA	NA	NA	NA	NA	NA	NA	NA
D907_A	con2_NOF	3R	16621729	16621904	NA	NA	0.00492611	NA	de_novo_not_considered	NA	NA	NA	NA	NA	NA	NA	NA
D907_A	con33_17-6	3L	4556137	4556312	NA	NA	0.00571429	NA	de_novo_not_considered	NA	NA	NA	NA	NA	NA	NA	NA
D907_A	con3_G6b	X	16102853	16103028	NA	NA	0.00628931	NA	de_novo_not_considered	NA	NA	NA	NA	NA	NA	NA	NA
D907_A	con41_UnFmcl001_RLX-incomp	2L	2862524	2862699	NA	NA	0.00613497	NA	de_novo_not_considered	NA	NA	NA	NA	NA	NA	NA	NA
D907_A	con41_UnFmcl001_RLX-incomp	3L	8704188	8704230	NA	NA	0.00487805	NA	de_novo_not_considered	NA	NA	NA	NA	NA	NA	NA	NA
D907_A	con41_UnFmcl001_RLX-incomp	3R	27636419	27636594	NA	NA	0.00636943	NA	de_novo_not_considered	NA	NA	NA	NA	NA	NA	NA	NA
D907_A	con41_UnFmcl001_RLX-incomp	X	10642012	10642187	NA	NA	0.00369004	NA	de_novo_not_considered	NA	NA	NA	NA	NA	NA	NA	NA
D907_A	con42_mdg1	X	8091368	8091396	NA	NA	0.012987	NA	de_novo_not_considered	NA	NA	NA	NA	NA	NA	NA	NA
D907_A	con43_H	3R	12539812	12539987	NA	NA	0.004329	NA	de_novo_not_considered	NA	NA	NA	NA	NA	NA	NA	NA
D907_A	con43_H	X	8891422	8891597	NA	NA	0.00502513	NA	de_novo_not_considered	NA	NA	NA	NA	NA	NA	NA	NA
D907_A	con46_297	X	11874543	11874718	NA	NA	0.00358423	NA	de_novo_not_considered	NA	NA	NA	NA	NA	NA	NA	NA
D907_A	con48_412	2R	21708225	21708400	NA	NA	0.00444444	NA	de_novo_not_considered	NA	NA	NA	NA	NA	NA	NA	NA
D907_A	con48_roo	2R	13247628	13247649	NA	NA	0.0282486	NA	de_novo_not_considered	NA	NA	NA	NA	NA	NA	NA	NA
D907_A	con48_roo	3R	28358837	28359012	NA	NA	0.00469484	NA	de_novo_not_considered	NA	NA	NA	NA	NA	NA	NA	NA
D907_A	con4_Doc2	3R	11469226	11469401	NA	NA	0.00440529	NA	de_novo_not_considered	NA	NA	NA	NA	NA	NA	NA	NA
D907_A	con4_Doc2	X	12822789	12822964	NA	NA	0.00529101	NA	de_novo_not_considered	NA	NA	NA	NA	NA	NA	NA	NA
D907_A	con4_GATEa	3L	1941103	1941278	NA	NA	0.00404858	NA	de_novo_not_considered	NA	NA	NA	NA	NA	NA	NA	NA
D907_A	con4_GATEa	3R	20339182	20339357	NA	NA	0.00507614	NA	de_novo_not_considered	NA	NA	NA	NA	NA	NA	NA	NA
D907_A	con4_GATEa	3R	20817188	20817363	NA	NA	0.00436681	NA	de_novo_not_considered	NA	NA	NA	NA	NA	NA	NA	NA
D907_A	con5_Cr1a	2R	24553591	24553766	NA	NA	0.00309598	NA	de_novo_not_considered	NA	NA	NA	NA	NA	NA	NA	NA
D907_A	con8_G2	3L	5292964	5293139	NA	NA	0.00401606	NA	de_novo_not_considered	NA	NA	NA	NA	NA	NA	NA	NA
D907_A	con48_roo	X	11375016	11375029	NA	NA	NA	1	no_data	NA	1	1	1	1	1	1	1
D907_A	BDGP_G5	3R	11568354	11568628	NA	NA	NA	NA	no_data	NA	NA	NA	NA	NA	NA	NA	NA
D907_A	BDGP_G5	3R	16004314	16004413	NA	NA	NA	NA	no_data	NA	NA	NA	NA	NA	NA	NA	NA
D907_A	BDGP_G5A	2L	15204072	15204167	NA	NA	NA	NA	no_data	NA	NA	NA	NA	NA	NA	NA	NA
D907_A	BDGP_G5A	3L	11837764	11837959	NA	NA	NA	NA	no_data	NA	NA	NA	NA	NA	NA	NA	NA
D907_A	BDGP_G5A	3R	7060658	7060731	NA	NA	NA	NA	no_data	NA	NA	NA	NA	NA	NA	NA	NA
D907_A	BDGP_G5A	X	2426004	2426434	NA	NA	NA	NA	no_data	NA	NA	NA	NA	NA	NA	NA	NA
D907_A	BDGP_G5A	X	5873664	5873866	NA	NA	NA	NA	no_data	NA	NA	NA	NA	NA	NA	NA	NA
D907_A	BDGP_G5A	X	6952115	6952287	NA	NA	NA	NA	no_data	NA	NA	NA	NA	NA	NA	NA	NA
D907_A	BDGP_Helena	3R	7475559	7475799	NA	NA	NA	NA	no_data	NA	NA	NA	NA	NA	NA	NA	NA
D907_A	BDGP_Q-element;con5_Cr1a;con5_Cr1a	3R	8042711	8043821	NA	NA	NA	NA	no_data	NA	NA	NA	NA	NA	NA	NA	NA
D907_A	BDGP_R1A1-element	X	21034554	21034634	NA	NA	NA	NA	no_data	NA	NA	NA	NA	NA	NA	NA	NA
D907_A	BDGP_Rt1c	X	20226131	20226596	NA	NA	NA	NA	no_data	NA	NA	NA	NA	NA	NA	NA	NA
D907_A	BDGP_Rt1c	X	21033803	21034498	NA	NA	NA	NA	no_data	NA	NA	NA	NA	NA	NA	NA	NA
D907_A	BDGP_TART-A	3L	16576993	16577221	NA	NA	NA	NA	no_data	NA	NA	NA	NA	NA	NA	NA	NA
D907_A	BDGP_TART-A	3L	16577524	16577693	NA	NA	NA	NA	no_data	NA	NA	NA	NA	NA	NA	NA	NA
D907_A	BDGP_gypsy2	3L	18470324	18471291	NA	NA	NA	NA	no_data	NA	NA	NA	NA	NA	NA	NA	NA
D907_A	BDGP_jockey2	2R	8436899	8437119	NA	NA	NA	NA	no_data	NA	NA	NA	NA	NA	NA	NA	NA
D907_A	BDGP_jockey2	X	15746342	15746496	NA	NA	NA	NA	no_data	NA	NA	NA	NA	NA	NA	NA	NA
D907_A	BDGP_jockey2	X	16727048	16727122	NA	NA	NA	NA	no_data	NA	NA	NA	NA	NA	NA	NA	NA
D907_A	BDGP_jockey2	X	21171512	21172860	NA	NA	NA	NA	no_data	NA	NA	NA	NA	NA	NA	NA	NA
D907_A	BDGP_rooA	2R	6327008	6327802	NA	NA	NA	NA	no_data	NA	NA	NA	NA	NA	NA	NA	NA
D907_A	BDGP_rooA	2R	6327900	6327982	NA	NA	NA	NA	no_data	NA	NA	NA	NA	NA	NA	NA	NA
D907_A	BDGP_rooA	2R	6328139	6328264	NA	NA	NA	NA	no_data	NA	NA	NA	NA	NA	NA	NA	NA
D907_A	BDGP_transib4	X	6755779	6755933	NA	NA	NA	NA	no_data	NA	NA	NA	NA	NA	NA	NA	NA
D907_A	BDGP_transib4	X	6755954	6756203	NA	NA	NA	NA	no_data	NA	NA	NA	NA	NA	NA	NA	NA
D907_A	DNAREP1_INE-1	2L	5120269	5120404	NA	NA	NA	NA	no_data	NA	NA	NA	NA	NA	NA	NA	NA
D907_A	DNAREP1_INE-1	2L	18159137	18159734	NA	NA	NA	NA	no_data	NA	NA	NA	NA	NA	NA	NA	NA
D907_A	DNAREP1_INE-1	2R	6160988	6161247	NA	NA	NA	NA	no_data	NA	NA	NA	NA	NA	NA	NA	NA
D907_A	DNAREP1_INE-1	2R	6198281	6198341	NA	NA	NA	NA	no_data	NA	NA	NA	NA	NA	NA	NA	NA
D907_A	DNAREP1_INE-1	2R	11352780	11353111	NA	NA	NA	NA	no_data	NA	NA	NA	NA	NA	NA	NA	NA
D907_A	DNAREP1_INE-1	2R	12247988	12248036	NA	NA	NA	NA	no_data	NA	NA	NA	NA	NA	NA	NA	NA
D907_A	DNAREP1_INE-1	3L	13428349	13428619	NA	NA	NA	NA	no_data	NA	NA	NA	NA	NA	NA	NA	NA
D907_A	DNAREP1_INE-1	3L	17835827	17836177	NA	NA	NA	NA	no_data	NA	NA	NA	NA	NA	NA	NA	NA
D907_A	DNAREP1_INE-1	3R	18084419	18084611	NA	NA	NA	NA	no_data	NA	NA	NA	NA	NA	NA	NA	NA
D907_A	DNAREP1_INE-1	3R	23891449	23891567	NA	NA	NA	NA	no_data	NA	NA	NA	NA	NA	NA	NA	NA
D907_A	DNAREP1_INE-1	X	9160205	9160424	NA	NA	NA	NA	no_data	NA	NA	NA	NA	NA	NA	NA	NA
D907_A	DNAREP1_INE-1	X	14583198	14583469	NA	NA	NA	NA	no_data	NA	NA	NA	NA	NA	NA	NA	NA
D907_A	DNAREP1_INE-1	X	14815571	14815830	NA	NA	NA	NA	no_data	NA	NA	NA	NA	NA	NA	NA	NA
D907_A	DNAREP1_INE-1	X	15408774	15408897	NA	NA	NA	NA	no_data	NA	NA	NA	NA	NA	NA	NA	NA
D907_A	DNAREP1_INE-1	X	16838012	16838098	NA	NA	NA	NA	no_data	NA	NA	NA	NA	NA	NA	NA	NA
D907_A	DNAREP1_INE-1	X	19330616	19330843	NA	NA	NA	NA	no_data	NA	NA	NA	NA	NA	NA	NA	NA
D907_A	DNAREP1_INE-1	X	19809911	19810254	NA	NA	NA	NA	no_data	NA	NA	NA	NA	NA	NA	NA	NA
D907_A	DNAREP1_INE-1	X	20381417	20381725	NA	NA	NA	NA	no_data	NA	NA	NA	NA	NA	NA	NA	NA
D907_A	DNAREP1_INE-1	X	20528137	20528247	NA	NA	NA	NA	no_data	NA	NA	NA	NA	NA	NA	NA	NA
D907_A	DNAREP1_INE-1	X	20674999	20675124	NA	NA	NA	NA	no_data	NA	NA	NA	NA	NA	NA	NA	NA
D907_A	DNAREP1_INE-1	X	20880121	20880616	NA	NA	NA	NA	no_data	NA	NA	NA	NA	NA	NA	NA	NA
D907_A	DNAREP1_INE-1	X	20928950	20929069	NA	NA	NA	NA	no_data	NA	NA	NA	NA	NA	NA	NA	NA
D907_A	DNAREP1_INE-1	X	21036958	21037213	NA	NA	NA	NA	no_data	NA	NA	NA	NA	NA	NA	NA	NA
D907_A	DNAREP1_INE-1;DNAREP1_INE-1;UnFUnClUnAlig_DHX-incomp_COR	2R	16152231	16152596	NA	NA	NA	NA	no_data	NA	NA	NA	NA	NA	NA	NA	NA
D907_A	DNAREP1_INE-1;DNAREP1_INE-1;UnFUnClUnAlig_DHX-incomp_COR	X	18843010	18843367	NA	NA	NA	NA	no_data	NA	NA	NA	NA	NA	NA	NA	NA
D907_A	DNAREP1_INE-1;DNAREP1_INE-1;con7_Dbuz-INE-1	3L	6315155	6315521	NA	NA	NA	NA	no_data	NA	NA	NA	NA	NA	NA	NA	NA
D907_A	DNAREP1_INE-1;UnFUnClUnAlig_DHX-incomp_COR	2L	10404148	10404324	NA	NA	NA	NA	no_data	NA	NA	NA	NA	NA	NA	NA	NA
D907_A	DNAREP1_INE-1;UnFUnClUnAlig_DHX-incomp_COR	2L	17361746	17361812	NA	NA	NA	NA	no_data	NA	NA	NA	NA	NA	NA	NA	NA
D907_A	DNAREP1_INE-1;UnFUnClUnAlig_DHX-incomp_COR	2R	6172356	6172582	NA	NA	NA	NA	no_data	NA	NA	NA	NA	NA	NA	NA	NA
D907_A	DNAREP1_INE-1;UnFUnClUnAlig_DHX-incomp_COR	2R	6243777	6244293	NA	NA	NA	NA	no_data	NA	NA	NA	NA	NA	NA	NA	NA
D907_A	DNAREP1_INE-1;UnFUnClUnAlig_DHX-incomp_COR	2R	7022714	7023136	NA	NA	NA	NA	no_data	NA	NA	NA	NA	NA	NA	NA	NA
D907_A	DNAREP1_INE-1;UnFUnClUnAlig_DHX-incomp_COR	2R	15693282	15693349	NA	NA	NA	NA	no_data	NA	NA	NA	NA	NA	NA	NA	NA
D907_A	DNAREP1_INE-1;UnFUnClUnAlig_DHX-incomp_COR	2R	20361138	20361425	NA	NA	NA	NA	no_data	NA	NA	NA	NA	NA	NA	NA	NA
D907_A	DNAREP1_INE-1;UnFUnClUnAlig_DHX-incomp_COR	3R	18295668	18295869	NA	NA	NA	NA	no_data	NA	NA	NA	NA	NA	NA	NA	NA
D907_A	DNAREP1_INE-1;UnFUnClUnAlig_DHX-incomp_COR	3R	24279373	24279455	NA	NA	NA	NA	no_data	NA	NA	NA	NA	NA	NA	NA	NA
D907_A	DNAREP1_INE-1;UnFUnClUnAlig_DHX-incomp_COR	X	1820631	1820952	NA	NA	NA	NA	no_data	NA	NA	NA	NA	NA	NA	NA	NA
D907_A	DNAREP1_INE-1;UnFUnClUnAlig_DHX-incomp_COR	X	14770576	14770741	NA	NA	NA	NA	no_data	NA	NA	NA	NA	NA	NA	NA	NA
D907_A	DNAREP1_INE-1;UnFUnClUnAlig_DHX-incomp_COR	X	17280957	17281161	NA	NA	NA	NA	no_data	NA	NA	NA	NA	NA	NA	NA	NA
D907_A	DNAREP1_INE-1;UnFUnClUnAlig_DHX-incomp_COR	X	19121949	19122431	NA	NA	NA	NA	no_data	NA	NA	NA	NA	NA	NA	NA	NA
D907_A	DNAREP1_INE-1;UnFUnClUnAlig_DHX-incomp_COR	X	20349516	20349715	NA	NA	NA	NA	no_data	NA	NA	NA	NA	NA	NA	NA	NA
D907_A	DNAREP1_INE-1;UnFUnClUnAlig_DHX-incomp_COR	X	20894718	20895075	NA	NA	NA	NA	no_data	NA	NA	NA	NA	NA	NA	NA	NA
D907_A	DNAREP1_INE-1;UnFUnClUnAlig_DHX-incomp_COR	X	21133053	21133164	NA	NA	NA	NA	no_data	NA	NA	NA	NA	NA	NA	NA	NA
D907_A	DNAREP1_INE-1;UnFUnClUnAlig_DHX-incomp_COR;DNAREP1_INE-1;UnFUnClUnAlig_DHX-incomp_COR;con4_UnFUnCl002_DHX-incomp	X	6881100	6881285	NA	NA	NA	NA	no_data	NA	NA	NA	NA	NA	NA	NA	NA
D907_A	DNAREP1_INE-1;UnFUnClUnAlig_DHX-incomp_COR;DNAREP1_INE-1;UnFUnClUnAlig_DHX-incomp_COR;con4_UnFUnCl002_DHX-incomp	X	15433199	15433645	NA	NA	NA	NA	no_data	NA	NA	NA	NA	NA	NA	NA	NA
D907_A	DNAREP1_INE-1;UnFUnClUnAlig_DHX-incomp_COR;DNAREP1_INE-1;UnFUnClUnAlig_DHX-incomp_COR;con4_UnFUnCl002_DHX-incomp	X	21285154	21285264	NA	NA	NA	NA	no_data	NA	NA	NA	NA	NA	NA	NA	NA
D907_A	DNAREP1_INE-1;UnFUnClUnAlig_DHX-incomp_COR;DNAREP1_INE-1;UnFUnClUnAlig_DHX-incomp_COR;con7_Dbuz-INE-1	X	20956461	20956797	NA	NA	NA	NA	no_data	NA	NA	NA	NA	NA	NA	NA	NA
D907_A	DNAREP1_INE-1;UnFUnClUnAlig_DHX-incomp_COR;UnFUnClUnAlig_DHX-incomp_COR	2L	17458147	17458403	NA	NA	NA	NA	no_data	NA	NA	NA	NA	NA	NA	NA	NA
D907_A	DNAREP1_INE-1;UnFUnClUnAlig_DHX-incomp_COR;con4_UnFUnCl002_DHX-incomp	X	15554732	15555223	NA	NA	NA	NA	no_data	NA	NA	NA	NA	NA	NA	NA	NA
D907_A	DNAREP1_INE-1;UnFUnClUnAlig_DHX-incomp_COR;con4_UnFUnCl002_DHX-incomp	X	15666648	15666923	NA	NA	NA	NA	no_data	NA	NA	NA	NA	NA	NA	NA	NA
D907_A	DNAREP1_INE-1;UnFUnClUnAlig_DHX-incomp_COR;con4_UnFUnCl002_DHX-incomp;DNAREP1_INE-1;con4_UnFUnCl002_DHX-incomp	X	6880987	6881060	NA	NA	NA	NA	no_data	NA	NA	NA	NA	NA	NA	NA	NA
D907_A	DNAREP1_INE-1;UnFUnClUnAlig_DHX-incomp_COR;con7_Dbuz-INE-1	2L	16679131	16679701	NA	NA	NA	NA	no_data	NA	NA	NA	NA	NA	NA	NA	NA
D907_A	DNAREP1_INE-1;UnFUnClUnAlig_DHX-incomp_COR;con7_Dbuz-INE-1	2L	17973613	17974104	NA	NA	NA	NA	no_data	NA	NA	NA	NA	NA	NA	NA	NA
D907_A	DNAREP1_INE-1;UnFUnClUnAlig_DHX-incomp_COR;con7_Dbuz-INE-1	2R	5987254	5987656	NA	NA	NA	NA	no_data	NA	NA	NA	NA	NA	NA	NA	NA
D907_A	DNAREP1_INE-1;UnFUnClUnAlig_DHX-incomp_COR;con7_Dbuz-INE-1	2R	7925444	7925654	NA	NA	NA	NA	no_data	NA	NA	NA	NA	NA	NA	NA	NA
D907_A	DNAREP1_INE-1;UnFUnClUnAlig_DHX-incomp_COR;con7_Dbuz-INE-1	3R	12212289	12212635	NA	NA	NA	NA	no_data	NA	NA	NA	NA	NA	NA	NA	NA
D907_A	DNAREP1_INE-1;UnFUnClUnAlig_DHX-incomp_COR;con7_Dbuz-INE-1	X	1818634	1819046	NA	NA	NA	NA	no_data	NA	NA	NA	NA	NA	NA	NA	NA
D907_A	DNAREP1_INE-1;UnFUnClUnAlig_DHX-incomp_COR;con7_Dbuz-INE-1	X	17622067	17622341	NA	NA	NA	NA	no_data	NA	NA	NA	NA	NA	NA	NA	NA
D907_A	DNAREP1_INE-1;UnFUnClUnAlig_DHX-incomp_COR;con7_Dbuz-INE-1	X	17866568	17866788	NA	NA	NA	NA	no_data	NA	NA	NA	NA	NA	NA	NA	NA
D907_A	DNAREP1_INE-1;UnFUnClUnAlig_DHX-incomp_COR;con7_Dbuz-INE-1	X	21125682	21125894	NA	NA	NA	NA	no_data	NA	NA	NA	NA	NA	NA	NA	NA
D907_A	DNAREP1_INE-1;UnFUnClUnAlig_DHX-incomp_COR;con7_Dbuz-INE-1	X	21300472	21300894	NA	NA	NA	NA	no_data	NA	NA	NA	NA	NA	NA	NA	NA
D907_A	DNAREP1_INE-1;con4_UnFUnCl002_DHX-incomp	2L	4030517	4030645	NA	NA	NA	NA	no_data	NA	NA	NA	NA	NA	NA	NA	NA
D907_A	DNAREP1_INE-1;con4_UnFUnCl002_DHX-incomp	2L	8051724	8051823	NA	NA	NA	NA	no_data	NA	NA	NA	NA	NA	NA	NA	NA
D907_A	DNAREP1_INE-1;con4_UnFUnCl002_DHX-incomp	2L	18177123	18177275	NA	NA	NA	NA	no_data	NA	NA	NA	NA	NA	NA	NA	NA
D907_A	DNAREP1_INE-1;con4_UnFUnCl002_DHX-incomp	2R	6154709	6154894	NA	NA	NA	NA	no_data	NA	NA	NA	NA	NA	NA	NA	NA
D907_A	DNAREP1_INE-1;con4_UnFUnCl002_DHX-incomp	2R	6947120	6947316	NA	NA	NA	NA	no_data	NA	NA	NA	NA	NA	NA	NA	NA
D907_A	DNAREP1_INE-1;con4_UnFUnCl002_DHX-incomp	2R	8432383	8432669	NA	NA	NA	NA	no_data	NA	NA	NA	NA	NA	NA	NA	NA
D907_A	DNAREP1_INE-1;con4_UnFUnCl002_DHX-incomp	2R	12138480	12138703	NA	NA	NA	NA	no_data	NA	NA	NA	NA	NA	NA	NA	NA
D907_A	DNAREP1_INE-1;con4_UnFUnCl002_DHX-incomp	3L	14630297	14630463	NA	NA	NA	NA	no_data	NA	NA	NA	NA	NA	NA	NA	NA
D907_A	DNAREP1_INE-1;con4_UnFUnCl002_DHX-incomp	3L	16324544	16324698	NA	NA	NA	NA	no_data	NA	NA	NA	NA	NA	NA	NA	NA
D907_A	DNAREP1_INE-1;con4_UnFUnCl002_DHX-incomp	3R	7001646	7001859	NA	NA	NA	NA	no_data	NA	NA	NA	NA	NA	NA	NA	NA
D907_A	DNAREP1_INE-1;con4_UnFUnCl002_DHX-incomp	3R	7764480	7764824	NA	NA	NA	NA	no_data	NA	NA	NA	NA	NA	NA	NA	NA
D907_A	DNAREP1_INE-1;con4_UnFUnCl002_DHX-incomp	3R	17837815	17837989	NA	NA	NA	NA	no_data	NA	NA	NA	NA	NA	NA	NA	NA
D907_A	DNAREP1_INE-1;con4_UnFUnCl002_DHX-incomp	3R	18259185	18259399	NA	NA	NA	NA	no_data	NA	NA	NA	NA	NA	NA	NA	NA
D907_A	DNAREP1_INE-1;con4_UnFUnCl002_DHX-incomp	X	10326195	10326523	NA	NA	NA	NA	no_data	NA	NA	NA	NA	NA	NA	NA	NA
D907_A	DNAREP1_INE-1;con4_UnFUnCl002_DHX-incomp	X	17281308	17281387	NA	NA	NA	NA	no_data	NA	NA	NA	NA	NA	NA	NA	NA
D907_A	DNAREP1_INE-1;con4_UnFUnCl002_DHX-incomp	X	18894016	18894345	NA	NA	NA	NA	no_data	NA	NA	NA	NA	NA	NA	NA	NA
D907_A	DNAREP1_INE-1;con4_UnFUnCl002_DHX-incomp	X	21125509	21125633	NA	NA	NA	NA	no_data	NA	NA	NA	NA	NA	NA	NA	NA
D907_A	DNAREP1_INE-1;con4_UnFUnCl002_DHX-incomp;DNAREP1_INE-1;con4_UnFUnCl002_DHX-incomp;con7_Dbuz-INE-1	X	18414829	18415224	NA	NA	NA	NA	no_data	NA	NA	NA	NA	NA	NA	NA	NA
D907_A	DNAREP1_INE-1;con4_UnFUnCl002_DHX-incomp;con7_Dbuz-INE-1;DNAREP1_INE-1;con7_Dbuz-INE-1	X	21191261	21191832	NA	NA	NA	NA	no_data	NA	NA	NA	NA	NA	NA	NA	NA
D907_A	DNAREP1_INE-1;con4_UnFUnCl002_DHX-incomp;con7_Dbuz-INE-1;DNAREP1_INE-1;con7_Dbuz-INE-1	X	21216019	21216499	NA	NA	NA	NA	no_data	NA	NA	NA	NA	NA	NA	NA	NA
D907_A	DNAREP1_INE-1;con7_Dbuz-INE-1	2L	10984382	10984669	NA	NA	NA	NA	no_data	NA	NA	NA	NA	NA	NA	NA	NA
D907_A	DNAREP1_INE-1;con7_Dbuz-INE-1	2L	18011676	18012151	NA	NA	NA	NA	no_data	NA	NA	NA	NA	NA	NA	NA	NA
D907_A	DNAREP1_INE-1;con7_Dbuz-INE-1	2R	6031588	6031710	NA	NA	NA	NA	no_data	NA	NA	NA	NA	NA	NA	NA	NA
D907_A	DNAREP1_INE-1;con7_Dbuz-INE-1	2R	6948450	6948973	NA	NA	NA	NA	no_data	NA	NA	NA	NA	NA	NA	NA	NA
D907_A	DNAREP1_INE-1;con7_Dbuz-INE-1	2R	11672318	11672492	NA	NA	NA	NA	no_data	NA	NA	NA	NA	NA	NA	NA	NA
D907_A	DNAREP1_INE-1;con7_Dbuz-INE-1	3L	9446438	9446733	NA	NA	NA	NA	no_data	NA	NA	NA	NA	NA	NA	NA	NA
D907_A	DNAREP1_INE-1;con7_Dbuz-INE-1	3R	23891199	23891387	NA	NA	NA	NA	no_data	NA	NA	NA	NA	NA	NA	NA	NA
D907_A	DNAREP1_INE-1;con7_Dbuz-INE-1	3R	24506146	24506355	NA	NA	NA	NA	no_data	NA	NA	NA	NA	NA	NA	NA	NA
D907_A	DNAREP1_INE-1;con7_Dbuz-INE-1	X	14766445	14766968	NA	NA	NA	NA	no_data	NA	NA	NA	NA	NA	NA	NA	NA
D907_A	DNAREP1_INE-1;con7_Dbuz-INE-1	X	16255052	16255151	NA	NA	NA	NA	no_data	NA	NA	NA	NA	NA	NA	NA	NA
D907_A	DNAREP1_INE-1;con7_Dbuz-INE-1	X	17622403	17622464	NA	NA	NA	NA	no_data	NA	NA	NA	NA	NA	NA	NA	NA
D907_A	DNAREP1_INE-1;con7_Dbuz-INE-1	X	18356596	18357130	NA	NA	NA	NA	no_data	NA	NA	NA	NA	NA	NA	NA	NA
D907_A	DNAREP1_INE-1;con7_Dbuz-INE-1	X	20093451	20093927	NA	NA	NA	NA	no_data	NA	NA	NA	NA	NA	NA	NA	NA
D907_A	DNAREP1_INE-1;con7_Dbuz-INE-1	X	20344084	20344373	NA	NA	NA	NA	no_data	NA	NA	NA	NA	NA	NA	NA	NA
D907_A	DNAREP1_INE-1;con7_Dbuz-INE-1	X	20930500	20930855	NA	NA	NA	NA	no_data	NA	NA	NA	NA	NA	NA	NA	NA
D907_A	UnFUnClUnAlig_DHX-incomp_COR	2R	6164967	6165060	NA	NA	NA	NA	no_data	NA	NA	NA	NA	NA	NA	NA	NA
D907_A	UnFUnClUnAlig_DHX-incomp_COR	2R	12247695	12247919	NA	NA	NA	NA	no_data	NA	NA	NA	NA	NA	NA	NA	NA
D907_A	UnFUnClUnAlig_DHX-incomp_COR	3L	18463691	18464107	NA	NA	NA	NA	no_data	NA	NA	NA	NA	NA	NA	NA	NA
D907_A	UnFUnClUnAlig_DHX-incomp_COR	X	21283435	21283718	NA	NA	NA	NA	no_data	NA	NA	NA	NA	NA	NA	NA	NA
D907_A	UnFUnClUnAlig_DXX-MITE_COR	X	6471389	6472525	NA	NA	NA	NA	no_data	NA	NA	NA	NA	NA	NA	NA	NA
D907_A	UnFUnClUnAlig_RIX-comp_TEN	X	19820998	19821447	NA	NA	NA	NA	no_data	NA	NA	NA	NA	NA	NA	NA	NA
D907_A	UnFUnClUnAlig_RIX-comp_TEN	X	19983080	19983747	NA	NA	NA	NA	no_data	NA	NA	NA	NA	NA	NA	NA	NA
D907_A	UnFUnClUnAlig_RIX-comp_TEN	X	20144775	20144896	NA	NA	NA	NA	no_data	NA	NA	NA	NA	NA	NA	NA	NA
D907_A	UnFUnClUnAlig_RIX-comp_TEN	X	20859636	20859711	NA	NA	NA	NA	no_data	NA	NA	NA	NA	NA	NA	NA	NA
D907_A	UnFUnClUnAlig_RIX-comp_TEN	X	20860096	20860281	NA	NA	NA	NA	no_data	NA	NA	NA	NA	NA	NA	NA	NA
D907_A	UnFUnClUnAlig_RIX-comp_TEN	X	21083853	21086188	NA	NA	NA	NA	no_data	NA	NA	NA	NA	NA	NA	NA	NA
D907_A	UnFUnClUnAlig_RLX-incomp_COR;UnFmclCluster039_RLX-incomp_COR	2R	6817348	6817748	NA	NA	NA	NA	no_data	NA	NA	NA	NA	NA	NA	NA	NA
D907_A	UnFUnClUnAlig_RLX-incomp_TOM	3R	7642882	7644858	NA	NA	NA	NA	no_data	NA	NA	NA	NA	NA	NA	NA	NA
D907_A	UnFUnClUnAlig_RXX-TRIM_B22_2	3L	4849597	4852253	NA	NA	NA	NA	no_data	NA	NA	NA	NA	NA	NA	NA	NA
D907_A	UnFUnClUnAlig_noCat_SLO	X	20230746	20231016	NA	NA	NA	NA	no_data	NA	NA	NA	NA	NA	NA	NA	NA
D907_A	con10_3S18	X	20102561	20102992	NA	NA	NA	NA	no_data	NA	NA	NA	NA	NA	NA	NA	NA
D907_A	con11_hopper	3L	8951615	8951760	NA	NA	NA	0.553073	no_data	NA	NA	NA	NA	NA	NA	NA	NA
D907_A	con11_hopper	3L	18823106	18823294	NA	NA	NA	NA	no_data	NA	NA	NA	NA	NA	NA	NA	NA
D907_A	con11_hopper	X	11268617	11270052	NA	NA	NA	NA	no_data	NA	NA	NA	NA	NA	NA	NA	NA
D907_A	con11_mariner2	2R	7394129	7394671	NA	NA	NA	NA	no_data	NA	NA	NA	NA	NA	NA	NA	NA
D907_A	con11_mariner2	2R	7394936	7395159	NA	NA	NA	NA	no_data	NA	NA	NA	NA	NA	NA	NA	NA
D907_A	con12_Doc	2L	18581412	18584219	NA	NA	NA	NA	no_data	NA	NA	NA	NA	NA	NA	NA	NA
D907_A	con13_HB	2R	6989126	6990761	NA	NA	NA	NA	no_data	NA	NA	NA	NA	NA	NA	NA	NA
D907_A	con13_HB	3L	17242596	17243144	NA	NA	NA	NA	no_data	NA	NA	NA	NA	NA	NA	NA	NA
D907_A	con13_HB	3L	17245041	17245748	NA	NA	NA	NA	no_data	NA	NA	NA	NA	NA	NA	NA	NA
D907_A	con13_HB	X	15023157	15023670	NA	NA	NA	NA	no_data	NA	NA	NA	NA	NA	NA	NA	NA
D907_A	con13_Tc1	2R	14217964	14218442	NA	NA	NA	NA	no_data	NA	NA	NA	NA	NA	NA	NA	NA
D907_A	con13_Tc1	2R	14218473	14218722	NA	NA	NA	NA	no_data	NA	NA	NA	NA	NA	NA	NA	NA
D907_A	con15_Rt1b	2R	6260105	6260963	NA	NA	NA	NA	no_data	NA	NA	NA	NA	NA	NA	NA	NA
D907_A	con15_Rt1b	X	20396936	20397777	NA	NA	NA	NA	no_data	NA	NA	NA	NA	NA	NA	NA	NA
D907_A	con15_Rt1b	X	21177353	21178011	NA	NA	NA	NA	no_data	NA	NA	NA	NA	NA	NA	NA	NA
D907_A	con15_pogo	2L	2933353	2935476	NA	NA	NA	NA	no_data	NA	NA	NA	NA	NA	NA	NA	NA
D907_A	con15_pogo	2L	8968294	8968479	NA	NA	NA	NA	no_data	NA	NA	NA	NA	NA	NA	NA	NA
D907_A	con15_pogo	3R	8858837	8859148	NA	NA	NA	0.426667	no_data	NA	NA	NA	NA	NA	NA	NA	NA
D907_A	con15_pogo	X	11571505	11571692	NA	NA	NA	NA	no_data	NA	NA	NA	NA	NA	NA	NA	NA
D907_A	con17_invader3	3R	7819205	7819505	NA	NA	NA	NA	no_data	NA	NA	NA	NA	NA	NA	NA	NA
D907_A	con17_invader3	X	19107817	19108309	NA	NA	NA	NA	no_data	NA	NA	NA	NA	NA	NA	NA	NA
D907_A	con19_Quasimodo	3L	7356855	7357179	NA	NA	NA	NA	no_data	NA	NA	NA	NA	NA	NA	NA	NA
D907_A	con19_transib2	3L	14951134	14951341	NA	NA	NA	NA	no_data	NA	NA	NA	NA	NA	NA	NA	NA
D907_A	con19_transib2	3L	14954420	14956037	NA	NA	NA	NA	no_data	NA	NA	NA	NA	NA	NA	NA	NA
D907_A	con19_transib2	X	18555422	18556902	NA	NA	NA	NA	no_data	NA	NA	NA	NA	NA	NA	NA	NA
D907_A	con20_HMS-Beagle	3R	18196699	18196895	NA	NA	NA	NA	no_data	NA	NA	NA	NA	NA	NA	NA	NA
D907_A	con20_HMS-Beagle	X	4688367	4688650	NA	NA	NA	NA	no_data	NA	NA	NA	NA	NA	NA	NA	NA
D907_A	con20_jockey	3R	29319884	29320137	NA	NA	NA	NA	no_data	NA	NA	NA	NA	NA	NA	NA	NA
D907_A	con21_Ivk	3R	13349535	13349736	NA	NA	NA	NA	no_data	NA	NA	NA	NA	NA	NA	NA	NA
D907_A	con22_S-element	2L	6101123	6101639	NA	NA	NA	NA	no_data	NA	NA	NA	NA	NA	NA	NA	NA
D907_A	con22_S-element	2L	13783720	13783914	NA	NA	NA	NA	no_data	NA	NA	NA	NA	NA	NA	NA	NA
D907_A	con22_S-element	2R	6664228	6665973	NA	NA	NA	NA	no_data	NA	NA	NA	NA	NA	NA	NA	NA
D907_A	con22_S-element	3R	11957020	11957242	NA	NA	NA	NA	no_data	NA	NA	NA	NA	NA	NA	NA	NA
D907_A	con22_S-element	3R	13712126	13712421	NA	NA	NA	NA	no_data	NA	NA	NA	NA	NA	NA	NA	NA
D907_A	con22_S-element	3R	25495291	25495783	NA	NA	NA	NA	no_data	NA	NA	NA	NA	NA	NA	NA	NA
D907_A	con22_S-element	3R	29025437	29025890	NA	NA	NA	NA	no_data	NA	NA	NA	NA	NA	NA	NA	NA
D907_A	con22_S-element	X	6858946	6859261	NA	NA	NA	NA	no_data	NA	NA	NA	NA	NA	NA	NA	NA
D907_A	con22_S-element	X	15076815	15077382	NA	NA	NA	NA	no_data	NA	NA	NA	NA	NA	NA	NA	NA
D907_A	con22_S-element	X	21096178	21096866	NA	NA	NA	NA	no_data	NA	NA	NA	NA	NA	NA	NA	NA
D907_A	con24_Transpac	X	17817963	17818154	NA	NA	NA	NA	no_data	NA	NA	NA	NA	NA	NA	NA	NA
D907_A	con24_UnFmcl003_noCat	X	21311672	21311850	NA	NA	NA	NA	no_data	NA	NA	NA	NA	NA	NA	NA	NA
D907_A	con24_X-element	2L	11897167	11900038	NA	NA	NA	NA	no_data	NA	NA	NA	NA	NA	NA	NA	NA
D907_A	con24_X-element	3L	17834587	17834747	NA	NA	NA	NA	no_data	NA	NA	NA	NA	NA	NA	NA	NA
D907_A	con24_X-element	3R	7471048	7471765	NA	NA	NA	NA	no_data	NA	NA	NA	NA	NA	NA	NA	NA
D907_A	con24_X-element	X	12302009	12303258	NA	NA	NA	NA	no_data	NA	NA	NA	NA	NA	NA	NA	NA
D907_A	con25_1360	2L	17336127	17336709	NA	NA	NA	NA	no_data	NA	NA	NA	NA	NA	NA	NA	NA
D907_A	con25_1360	2R	8566087	8566676	NA	NA	NA	NA	no_data	NA	NA	NA	NA	NA	NA	NA	NA
D907_A	con25_1360	2R	8566711	8566983	NA	NA	NA	NA	no_data	NA	NA	NA	NA	NA	NA	NA	NA
D907_A	con25_1360	2R	10005905	10006492	NA	NA	NA	NA	no_data	NA	NA	NA	NA	NA	NA	NA	NA
D907_A	con25_1360	2R	10006527	10007012	NA	NA	NA	NA	no_data	NA	NA	NA	NA	NA	NA	NA	NA
D907_A	con25_1360	2R	14497441	14497926	NA	NA	NA	NA	no_data	NA	NA	NA	NA	NA	NA	NA	NA
D907_A	con25_1360	2R	14497961	14498549	NA	NA	NA	NA	no_data	NA	NA	NA	NA	NA	NA	NA	NA
D907_A	con25_1360	3L	1490529	1491015	NA	NA	NA	NA	no_data	NA	NA	NA	NA	NA	NA	NA	NA
D907_A	con25_1360	3L	11336208	11336473	NA	NA	NA	NA	no_data	NA	NA	NA	NA	NA	NA	NA	NA
D907_A	con25_1360	3R	22733080	22733350	NA	NA	NA	NA	no_data	NA	NA	NA	NA	NA	NA	NA	NA
D907_A	con25_1360	X	3703827	3703945	NA	NA	NA	NA	no_data	NA	NA	NA	NA	NA	NA	NA	NA
D907_A	con25_1360	X	20140387	20140658	NA	NA	NA	NA	no_data	NA	NA	NA	NA	NA	NA	NA	NA
D907_A	con25_1360	X	20781538	20782021	NA	NA	NA	NA	no_data	NA	NA	NA	NA	NA	NA	NA	NA
D907_A	con25_opus	2L	10845598	10845777	NA	NA	NA	NA	no_data	NA	NA	NA	NA	NA	NA	NA	NA
D907_A	con25_opus	3R	27789597	27789824	NA	NA	NA	NA	no_data	NA	NA	NA	NA	NA	NA	NA	NA
D907_A	con26_BS	2R	6799593	6799720	NA	NA	NA	NA	no_data	NA	NA	NA	NA	NA	NA	NA	NA
D907_A	con26_BS	2R	9945495	9945626	NA	NA	NA	NA	no_data	NA	NA	NA	NA	NA	NA	NA	NA
D907_A	con26_BS	3L	7130010	7130136	NA	NA	NA	NA	no_data	NA	NA	NA	NA	NA	NA	NA	NA
D907_A	con26_BS	3L	15056342	15056430	NA	NA	NA	NA	no_data	NA	NA	NA	NA	NA	NA	NA	NA
D907_A	con26_BS	3L	16730979	16731111	NA	NA	NA	NA	no_data	NA	NA	NA	NA	NA	NA	NA	NA
D907_A	con26_BS	3L	18514966	18520090	NA	NA	NA	NA	no_data	NA	NA	NA	NA	NA	NA	NA	NA
D907_A	con26_BS	3R	12780322	12780388	NA	NA	NA	NA	no_data	NA	NA	NA	NA	NA	NA	NA	NA
D907_A	con26_BS	3R	20506648	20507386	NA	NA	NA	NA	no_data	NA	NA	NA	NA	NA	NA	NA	NA
D907_A	con26_BS	X	8364904	8365235	NA	NA	NA	NA	no_data	NA	NA	NA	NA	NA	NA	NA	NA
D907_A	con26_BS	X	17143823	17143913	NA	NA	NA	NA	no_data	NA	NA	NA	NA	NA	NA	NA	NA
D907_A	con26_BS	X	18194123	18194597	NA	NA	NA	NA	no_data	NA	NA	NA	NA	NA	NA	NA	NA
D907_A	con26_BS	X	20266256	20266357	NA	NA	NA	NA	no_data	NA	NA	NA	NA	NA	NA	NA	NA
D907_A	con26_I-element	2L	10621003	10621198	NA	NA	NA	NA	no_data	NA	NA	NA	NA	NA	NA	NA	NA
D907_A	con26_I-element	3R	13375532	13375856	NA	NA	NA	NA	no_data	NA	NA	NA	NA	NA	NA	NA	NA
D907_A	con26_I-element	3R	27087291	27087693	NA	NA	NA	NA	no_data	NA	NA	NA	NA	NA	NA	NA	NA
D907_A	con26_I-element	X	20349746	20349962	NA	NA	NA	NA	no_data	NA	NA	NA	NA	NA	NA	NA	NA
D907_A	con2_Doc4	2L	16856284	16856954	NA	NA	NA	NA	no_data	NA	NA	NA	NA	NA	NA	NA	NA
D907_A	con2_NOF	X	8927641	8928286	NA	NA	NA	NA	no_data	NA	NA	NA	NA	NA	NA	NA	NA
D907_A	con3_G4	2L	8776875	8777081	NA	NA	NA	NA	no_data	NA	NA	NA	NA	NA	NA	NA	NA
D907_A	con3_G4	X	20385653	20385744	NA	NA	NA	NA	no_data	NA	NA	NA	NA	NA	NA	NA	NA
D907_A	con3_Tc1-2	2R	6163220	6164598	NA	NA	NA	NA	no_data	NA	NA	NA	NA	NA	NA	NA	NA
D907_A	con3_Tc1-2	2R	12317896	12319453	NA	NA	NA	NA	no_data	NA	NA	NA	NA	NA	NA	NA	NA
D907_A	con3_gypsy8	X	3940024	3940300	NA	NA	NA	NA	no_data	NA	NA	NA	NA	NA	NA	NA	NA
D907_A	con43_H	2L	16858757	16858996	NA	NA	NA	NA	no_data	NA	NA	NA	NA	NA	NA	NA	NA
D907_A	con43_H	3R	7641115	7641649	NA	NA	NA	NA	no_data	NA	NA	NA	NA	NA	NA	NA	NA
D907_A	con43_H	3R	7641803	7642369	NA	NA	NA	NA	no_data	NA	NA	NA	NA	NA	NA	NA	NA
D907_A	con43_H	3R	29604580	29604794	NA	NA	NA	NA	no_data	NA	NA	NA	NA	NA	NA	NA	NA
D907_A	con46_297	2R	15085033	15092030	NA	NA	NA	NA	no_data	NA	NA	NA	NA	NA	NA	NA	NA
D907_A	con46_297	2R	23877782	23878196	NA	NA	NA	NA	no_data	NA	NA	NA	NA	NA	NA	NA	NA
D907_A	con46_297	X	3662972	3663175	NA	NA	NA	NA	no_data	NA	NA	NA	NA	NA	NA	NA	NA
D907_A	con48_roo	2R	9869162	9869298	NA	NA	NA	NA	no_data	NA	NA	NA	NA	NA	NA	NA	NA
D907_A	con48_roo	3L	10854054	10854135	NA	NA	NA	NA	no_data	NA	NA	NA	NA	NA	NA	NA	NA
D907_A	con48_roo	3R	13491021	13491100	NA	NA	NA	NA	no_data	NA	NA	NA	NA	NA	NA	NA	NA
D907_A	con4_UnFUnCl002_DHX-incomp	2R	9843218	9843312	NA	NA	NA	NA	no_data	NA	NA	NA	NA	NA	NA	NA	NA
D907_A	con4_UnFUnCl002_DHX-incomp	3R	14707078	14707176	NA	NA	NA	NA	no_data	NA	NA	NA	NA	NA	NA	NA	NA
D907_A	con5_Cr1a	3L	9445469	9445650	NA	NA	NA	NA	no_data	NA	NA	NA	NA	NA	NA	NA	NA
D907_A	con5_hopper2	2R	10922931	10923054	NA	NA	NA	NA	no_data	NA	NA	NA	NA	NA	NA	NA	NA
D907_A	con5_hopper2	3L	17855720	17856020	NA	NA	NA	NA	no_data	NA	NA	NA	NA	NA	NA	NA	NA
D907_A	con5_hopper2	3L	17857977	17858079	NA	NA	NA	NA	no_data	NA	NA	NA	NA	NA	NA	NA	NA
D907_A	con5_hopper2	3L	18590203	18590483	NA	NA	NA	NA	no_data	NA	NA	NA	NA	NA	NA	NA	NA
D907_A	con5_hopper2	3R	8543481	8543632	NA	NA	NA	NA	no_data	NA	NA	NA	NA	NA	NA	NA	NA
D907_A	con6_UnFmcl028_RLX-incomp	3L	16787143	16787353	NA	NA	NA	NA	no_data	NA	NA	NA	NA	NA	NA	NA	NA
D907_A	con7_Dbuz-INE-1	3L	17874484	17876028	NA	NA	NA	NA	no_data	NA	NA	NA	NA	NA	NA	NA	NA
D907_A	con7_Dbuz-INE-1	3L	17876714	17876916	NA	NA	NA	NA	no_data	NA	NA	NA	NA	NA	NA	NA	NA
D907_A	con7_Dbuz-INE-1	3L	17876965	17877309	NA	NA	NA	NA	no_data	NA	NA	NA	NA	NA	NA	NA	NA
D907_A	con7_Dm88	3R	12500941	12500980	NA	NA	NA	NA	no_data	NA	NA	NA	NA	NA	NA	NA	NA
D907_A	con7_UnFmcl002_RXX-LARD	2L	9985202	9985618	NA	NA	NA	NA	no_data	NA	NA	NA	NA	NA	NA	NA	NA
D907_A	con7_UnFmcl002_RXX-LARD	3R	23707124	23707527	NA	NA	NA	NA	no_data	NA	NA	NA	NA	NA	NA	NA	NA
D907_A	con7_UnFmcl002_RXX-LARD	X	2768724	2769928	NA	NA	NA	NA	no_data	NA	NA	NA	NA	NA	NA	NA	NA
D907_A	con7_UnFmcl002_RXX-LARD	X	5490106	5491467	NA	NA	NA	NA	no_data	NA	NA	NA	NA	NA	NA	NA	NA
D907_A	con7_UnFmcl002_RXX-LARD	X	5521233	5523968	NA	NA	NA	NA	no_data	NA	NA	NA	NA	NA	NA	NA	NA
D907_A	con7_UnFmcl002_RXX-LARD	X	5846254	5846479	NA	NA	NA	NA	no_data	NA	NA	NA	NA	NA	NA	NA	NA
D907_A	con7_UnFmcl002_RXX-LARD	X	5867056	5867791	NA	NA	NA	NA	no_data	NA	NA	NA	NA	NA	NA	NA	NA
D907_A	con7_UnFmcl002_RXX-LARD	X	6351051	6351824	NA	NA	NA	NA	no_data	NA	NA	NA	NA	NA	NA	NA	NA
D907_A	con7_UnFmcl002_RXX-LARD	X	6714926	6715634	NA	NA	NA	NA	no_data	NA	NA	NA	NA	NA	NA	NA	NA
D907_A	con7_UnFmcl002_RXX-LARD	X	8267031	8267440	NA	NA	NA	NA	no_data	NA	NA	NA	NA	NA	NA	NA	NA
D907_A	con7_UnFmcl002_RXX-LARD	X	8369118	8369905	NA	NA	NA	NA	no_data	NA	NA	NA	NA	NA	NA	NA	NA
D907_A	con7_UnFmcl002_RXX-LARD	X	8851151	8851416	NA	NA	NA	NA	no_data	NA	NA	NA	NA	NA	NA	NA	NA
D907_A	con7_UnFmcl002_RXX-LARD	X	8980157	8980850	NA	NA	NA	NA	no_data	NA	NA	NA	NA	NA	NA	NA	NA
D907_A	con7_UnFmcl002_RXX-LARD	X	9033837	9034242	NA	NA	NA	NA	no_data	NA	NA	NA	NA	NA	NA	NA	NA
D907_A	con7_UnFmcl002_RXX-LARD	X	9072081	9072752	NA	NA	NA	NA	no_data	NA	NA	NA	NA	NA	NA	NA	NA
D907_A	con7_UnFmcl002_RXX-LARD	X	9092890	9093528	NA	NA	NA	NA	no_data	NA	NA	NA	NA	NA	NA	NA	NA
D907_A	con7_UnFmcl002_RXX-LARD	X	9106760	9106898	NA	NA	NA	NA	no_data	NA	NA	NA	NA	NA	NA	NA	NA
D907_A	con7_UnFmcl002_RXX-LARD	X	9137574	9139009	NA	NA	NA	NA	no_data	NA	NA	NA	NA	NA	NA	NA	NA
D907_A	con7_UnFmcl002_RXX-LARD	X	9296333	9297378	NA	NA	NA	NA	no_data	NA	NA	NA	NA	NA	NA	NA	NA
D907_A	con7_UnFmcl002_RXX-LARD	X	9313274	9314301	NA	NA	NA	NA	no_data	NA	NA	NA	NA	NA	NA	NA	NA
D907_A	con7_UnFmcl002_RXX-LARD	X	9374038	9374921	NA	NA	NA	NA	no_data	NA	NA	NA	NA	NA	NA	NA	NA
D907_A	con7_UnFmcl002_RXX-LARD	X	9396763	9397372	NA	NA	NA	NA	no_data	NA	NA	NA	NA	NA	NA	NA	NA
D907_A	con7_UnFmcl002_RXX-LARD	X	9461475	9462222	NA	NA	NA	NA	no_data	NA	NA	NA	NA	NA	NA	NA	NA
D907_A	con7_UnFmcl002_RXX-LARD	X	9515148	9516194	NA	NA	NA	NA	no_data	NA	NA	NA	NA	NA	NA	NA	NA
D907_A	con7_UnFmcl002_RXX-LARD	X	9534571	9535410	NA	NA	NA	NA	no_data	NA	NA	NA	NA	NA	NA	NA	NA
D907_A	con7_UnFmcl002_RXX-LARD	X	9556709	9557316	NA	NA	NA	NA	no_data	NA	NA	NA	NA	NA	NA	NA	NA
D907_A	con7_UnFmcl002_RXX-LARD	X	9597412	9598097	NA	NA	NA	NA	no_data	NA	NA	NA	NA	NA	NA	NA	NA
D907_A	con7_UnFmcl002_RXX-LARD	X	9710894	9711692	NA	NA	NA	NA	no_data	NA	NA	NA	NA	NA	NA	NA	NA
D907_A	con7_UnFmcl002_RXX-LARD	X	9725580	9727310	NA	NA	NA	NA	no_data	NA	NA	NA	NA	NA	NA	NA	NA
D907_A	con7_UnFmcl002_RXX-LARD	X	9772161	9772808	NA	NA	NA	NA	no_data	NA	NA	NA	NA	NA	NA	NA	NA
D907_A	con7_UnFmcl002_RXX-LARD	X	9840820	9841302	NA	NA	NA	NA	no_data	NA	NA	NA	NA	NA	NA	NA	NA
D907_A	con7_UnFmcl002_RXX-LARD	X	9870021	9870598	NA	NA	NA	NA	no_data	NA	NA	NA	NA	NA	NA	NA	NA
D907_A	con7_UnFmcl002_RXX-LARD	X	9880699	9881468	NA	NA	NA	NA	no_data	NA	NA	NA	NA	NA	NA	NA	NA
D907_A	con7_UnFmcl002_RXX-LARD	X	9904955	9905736	NA	NA	NA	NA	no_data	NA	NA	NA	NA	NA	NA	NA	NA
D907_A	con7_UnFmcl002_RXX-LARD	X	9919276	9920375	NA	NA	NA	NA	no_data	NA	NA	NA	NA	NA	NA	NA	NA
D907_A	con7_UnFmcl002_RXX-LARD	X	9941523	9941974	NA	NA	NA	NA	no_data	NA	NA	NA	NA	NA	NA	NA	NA
D907_A	con7_UnFmcl002_RXX-LARD	X	9983773	9984528	NA	NA	NA	NA	no_data	NA	NA	NA	NA	NA	NA	NA	NA
D907_A	con7_UnFmcl002_RXX-LARD	X	10006923	10008400	NA	NA	NA	NA	no_data	NA	NA	NA	NA	NA	NA	NA	NA
D907_A	con7_UnFmcl002_RXX-LARD	X	10048606	10049464	NA	NA	NA	NA	no_data	NA	NA	NA	NA	NA	NA	NA	NA
D907_A	con7_UnFmcl002_RXX-LARD	X	10155876	10156927	NA	NA	NA	NA	no_data	NA	NA	NA	NA	NA	NA	NA	NA
D907_A	con7_UnFmcl002_RXX-LARD	X	10291814	10292440	NA	NA	NA	NA	no_data	NA	NA	NA	NA	NA	NA	NA	NA
D907_A	con7_UnFmcl002_RXX-LARD	X	10302176	10303144	NA	NA	NA	NA	no_data	NA	NA	NA	NA	NA	NA	NA	NA
D907_A	con7_UnFmcl002_RXX-LARD	X	12046783	12048147	NA	NA	NA	NA	no_data	NA	NA	NA	NA	NA	NA	NA	NA
D907_A	con7_UnFmcl002_RXX-LARD	X	12437612	12438657	NA	NA	NA	NA	no_data	NA	NA	NA	NA	NA	NA	NA	NA
D907_A	con7_UnFmcl002_RXX-LARD	X	12493106	12494276	NA	NA	NA	NA	no_data	NA	NA	NA	NA	NA	NA	NA	NA
D907_A	con7_UnFmcl002_RXX-LARD	X	12524569	12525087	NA	NA	NA	NA	no_data	NA	NA	NA	NA	NA	NA	NA	NA
D907_A	con7_UnFmcl002_RXX-LARD	X	12545080	12545824	NA	NA	NA	NA	no_data	NA	NA	NA	NA	NA	NA	NA	NA
D907_A	con7_UnFmcl002_RXX-LARD	X	12682907	12684071	NA	NA	NA	NA	no_data	NA	NA	NA	NA	NA	NA	NA	NA
D907_A	con7_UnFmcl002_RXX-LARD	X	12757385	12757688	NA	NA	NA	NA	no_data	NA	NA	NA	NA	NA	NA	NA	NA
D907_A	con7_UnFmcl002_RXX-LARD	X	12794661	12797977	NA	NA	NA	NA	no_data	NA	NA	NA	NA	NA	NA	NA	NA
D907_A	con7_UnFmcl002_RXX-LARD	X	12928425	12929289	NA	NA	NA	NA	no_data	NA	NA	NA	NA	NA	NA	NA	NA
D907_A	con7_UnFmcl002_RXX-LARD	X	13126545	13127491	NA	NA	NA	NA	no_data	NA	NA	NA	NA	NA	NA	NA	NA
D907_A	con7_UnFmcl002_RXX-LARD	X	13530261	13530968	NA	NA	NA	NA	no_data	NA	NA	NA	NA	NA	NA	NA	NA
D907_A	con7_gypsy12	X	19596116	19596688	NA	NA	NA	NA	no_data	NA	NA	NA	NA	NA	NA	NA	NA
D907_A	con7_gypsy12	X	19813715	19814112	NA	NA	NA	NA	no_data	NA	NA	NA	NA	NA	NA	NA	NA
D907_A	con8_invader1	X	3796393	3796813	NA	NA	NA	NA	no_data	NA	NA	NA	NA	NA	NA	NA	NA
D907_A	con8_micropia	3R	7349763	7355237	NA	NA	NA	NA	no_data	NA	NA	NA	NA	NA	NA	NA	NA
D907_A	con9_Bari1	2R	18858285	18860019	NA	NA	NA	NA	no_data	NA	NA	NA	NA	NA	NA	NA	NA
D907_A	con9_Bari1	3R	19137124	19138866	NA	NA	NA	NA	no_data	NA	NA	NA	NA	NA	NA	NA	NA
D907_A	con9_UnFUnCl001_DTX-incomp	2L	6922924	6923454	NA	NA	NA	NA	no_data	NA	NA	NA	NA	NA	NA	NA	NA
D907_N	con20_jockey	3R	14986200	14986257	0.27957	0.0693069	1	0.461078	P0-C-A-N	1.86324	1.57e-52	7.72e-17	7.14e-51	1.06e-27	3.5e-15	0.00298	4.91e-07
D907_N	con15_Rt1b	3R	14946381	14946428	0.321212	0.0746269	1	0.546099	P0-C-A-N	1.91201	1.13e-50	1.82e-12	5.09e-49	2.12e-23	1.02e-17	0.00143	4.12e-08
D907_N	con20_jockey	3R	14608701	14608744	0.377049	0.162791	1	0.463415	P0-C-A-N	1.40309	4.93e-41	1.29e-15	5.86e-41	2.65e-22	5.46e-07	0.263	2.57e-05
D907_N	con11_hopper	3R	14991726	14991740	0.265823	0.0744681	1	0.469027	P0-C-A-N	2.06192	4.92e-40	1.76e-11	6.96e-39	4.89e-21	2.74e-12	0.00463	1.05e-05
D907_N	con25_opus	3R	14206198	14206221	0.370079	0.131579	1	0.59633	P0-C-A-N	1.94864	7.47e-39	1.45e-08	2.53e-37	2.95e-16	1.59e-13	0.00689	6.85e-06
D907_N	con41_UnFmcl001_RLX-incomp	2R	7014533	7014544	0.0315789	0.0595238	0.0761421	0.775	P0-C-A-N	25.6031	3.78e-36	5.08e-23	0.668	0.102	2.99e-23	2.6e-28	0.355
D907_N	con43_H	3R	13525725	13525746	0.363636	0.195266	1	0.527473	P0-C-A-N	1.97308	1.31e-33	7.7e-14	6.06e-32	1.18e-22	4.07e-08	0.00786	0.00221
D907_N	con43_H	3R	13225534	13225557	0.569444	0.190751	1	0.631902	P0-C-A-N	1.16493	4.62e-33	5.52e-10	4.16e-33	1.16e-11	6.36e-12	0.459	3.31e-09
D907_N	con12_Doc	3R	11449231	11449265	0.364706	0.231638	1	0.280488	P0-C-A-N	0.367106	6.67e-33	5.7e-25	8.28e-29	1.47e-20	0.404	0.214	0.0341
D907_N	con48_roo	3R	13917618	13917623	0.310811	0.101449	1	0.522124	P0-C-A-N	2.00932	4.08e-32	4.32e-08	1.52e-30	5.79e-15	1.3e-12	0.0045	9.02e-06
D907_N	con11_hopper	3R	13437020	13437225	0.284672	0.10101	1	0.46988	P0-C-A-N	2.00842	4.26e-32	5.9e-09	1.23e-31	1.23e-16	5.96e-09	0.0205	0.000107
D907_N	con14_F-element	3R	11471277	11471479	0.529412	0.239264	1	0.348837	P0-C-A-N	0.377645	1.04e-31	1.08e-22	4.84e-29	4.1e-13	0.0572	0.0109	1.94e-05
D907_N	con16_blood	3R	11131463	11131486	0.298246	0.181208	1	0.189189	P0-C-A-N	0.0681915	3.22e-30	7.95e-25	3.88e-25	3.18e-17	1	0.0906	0.078
D907_N	con26_Tirant	3R	10139277	10139295	0.28169	0.252874	1	0.25	P0-C-A-N	-0.0997363	2.75e-28	2.9e-23	2.9e-23	1.6e-20	1	0.8	0.8
D907_N	con26_BS	3R	10089592	10089608	0.376623	0.2875	1	0.367232	P0-C-A-N	0.894629	3.42e-28	5.64e-21	1.62e-24	1.05e-19	0.22	0.895	0.22
D907_N	con48_roo	3R	13992835	13992847	0.229358	0.147287	1	0.690476	P0-C-A-N	6.61853	1.16e-27	0.000185	5.91e-22	1.06e-16	1.66e-11	1.67e-07	0.149
D907_N	con25_opus	3R	22228645	22228656	0.302632	0.202381	1	0.6	P0-C-A-N	3.96623	1.19e-26	3.5e-07	8.46e-24	6.69e-18	5.72e-08	0.000108	0.0831
D907_N	con42_mdg1	3R	13852483	13852504	0.28972	0.0862944	1	0.460674	P0-C-A-N	1.84038	2.45e-26	3.15e-07	3.56e-25	1.86e-11	1.08e-09	0.0392	5.95e-05
D907_N	con45_Tabor	3R	10668525	10668557	0.422222	0.28125	1	0.234568	P0-C-A-N	-0.331144	4.09e-26	6.18e-24	9.27e-20	5.54e-14	0.451	0.0062	0.0604
D907_N	con14_F-element	3R	10731193	10731216	0.389831	0.268657	1	0.245902	P0-C-A-N	-0.187788	1.05e-25	3.48e-21	5.1e-21	5.96e-15	0.75	0.0598	0.107
D907_N	con24_X-element	3R	13621173	13621197	0.504	0.221477	1	0.669565	P0-C-A-N	1.58602	3.47e-25	7.83e-07	1.08e-24	2.95e-11	2.74e-09	0.0481	4.22e-05
D907_N	con33_17-6	3R	20844904	20845111	0.211679	0.526316	1	1	P0-C-A-N	1.50549	4.4e-25	1	2.66e-07	2.3e-17	1.23e-06	7.44e-16	1.72e-05
D907_N	con48_roo	3R	10126561	10126597	0.386139	0.271523	1	0.288889	P0-C-A-N	0.151515	3.63e-24	1.27e-19	5.83e-21	5.32e-14	0.881	0.241	0.174
D907_N	con26_Tirant	3R	22633193	22633213	0.424658	0.584615	1	1	P0-C-A-N	2.59685	5.14e-24	1	3.87e-09	1.5e-14	7.98e-10	1.94e-15	0.0466
D907_N	con17_Max-element	3R	11142246	11142269	0.493506	0.351724	1	0.354839	P0-C-A-N	0.0219703	1.12e-23	5.87e-20	6.09e-20	3.54e-14	1	0.0595	0.0595
D907_N	con22_S-element	3L	1969463	1969650	0.226415	1	0.2	0.253333	P0-C-A-N	-0.965204	1.65e-23	0.613	6.72e-19	0.741	1.73e-18	0.741	7.5e-18
D907_N	con45_Tabor	3R	11412387	11412394	0.392265	0.307692	1	0.367521	P0-C-A-N	0.707424	4.26e-23	1.18e-16	1.31e-19	1.36e-17	0.524	0.774	0.31
D907_N	con25_opus	3R	21011479	21011500	0.463768	0.619048	1	1	P0-C-A-N	2.45332	1.81e-22	1	8.84e-10	2.78e-15	5.37e-08	1.37e-12	0.0569
D907_N	con26_BS	3R	28187896	28187912	0.467532	0.590164	1	1	P0-C-A-N	3.342	2.42e-22	1	1.52e-08	4.53e-13	1.08e-09	2.59e-14	0.163
D907_N	con48_roo	3R	23403952	23403979	0.43662	0.586957	1	1	P0-C-A-N	2.74745	2.62e-22	1	2.58e-08	6.21e-14	3.08e-08	6.21e-14	0.0916
D907_N	con46_297	3R	9852021	9852050	0.305085	0.26	1	0.225225	P0-C-A-N	-0.771321	4.82e-22	1.63e-18	1.48e-16	1.13e-15	0.72	0.363	0.72
D907_N	con43_H	3R	25539321	25539374	0.554286	0.594203	1	1	P0-C-A-N	10.166	2.41e-21	1	8.8e-11	1.46e-12	5.2e-10	1.34e-11	0.799
D907_N	con25_opus	X	17623656	17623660	0.0813397	0.194631	0.134021	0.616667	P0-C-A-N	3.72523	4.21e-21	5.07e-14	0.202	0.152	4.16e-09	4.03e-19	0.00597
D907_N	con12_Doc	3R	20490055	20490084	0.518519	0.616667	1	1	P0-C-A-N	3.90566	2.88e-20	1	8.84e-09	3.36e-12	1.35e-08	3.36e-12	0.274
D907_N	con14_F-element	3R	27891265	27891285	0.482993	0.782178	1	1	P0-C-A-N	0.728051	1.05e-19	1	0.000138	8.04e-14	0.000311	3.84e-12	0.000311
D907_N	con14_F-element	3R	20430658	20430674	0.526316	0.712	1	1	P0-C-A-N	1.55102	1.31e-19	1	9.44e-07	1.05e-12	9.44e-07	1.05e-12	0.0222
D907_N	con16_blood	3R	28118803	28118831	0.392	0.530612	1	1	P0-C-A-N	3.38634	2.16e-19	1	6.48e-08	2.66e-12	7.41e-08	1.26e-11	0.126
D907_N	con48_roo	3R	11039697	11039717	0.283582	0.25	1	0.272727	P0-C-A-N	0.676761	2.49e-19	8.04e-16	8.04e-16	8.04e-16	0.878	0.878	0.878
D907_N	con48_roo	3R	24835119	24835131	0.40625	0.518519	1	1	P0-C-A-N	4.28864	3.33e-19	1	2.22e-08	7.11e-12	2.22e-08	7.11e-12	0.192
D907_N	con42_mdg1	3R	29657934	29657949	0.513889	0.623188	1	1	P0-C-A-N	3.44753	3.37e-19	1	1.21e-08	1.34e-11	2.31e-08	4.02e-11	0.21
D907_N	con14_F-element	3R	23596951	23597148	0.562914	0.520661	1	1	P0-C-A-N	11.3445	4.72e-19	1	2.74e-11	6.54e-11	2.98e-09	7.3e-09	0.778
D907_N	con14_F-element	3R	21603646	21603665	0.532847	0.736434	1	1	P0-C-A-N	1.29461	5.43e-19	1	2.04e-06	1.6e-12	2.04e-06	1.6e-12	0.0109
D907_N	con8_micropia	3R	20953808	20953830	0.531034	0.637931	1	1	P0-C-A-N	3.38708	5.44e-19	1	1.98e-08	4.77e-12	1.04e-07	4.89e-11	0.248
D907_N	con48_roo	3R	26367396	26367406	0.439394	0.595238	1	1	P0-C-A-N	2.59723	6.36e-19	1	2.76e-07	1.76e-12	9.76e-07	1.9e-11	0.109
D907_N	con48_roo	3R	19248241	19248259	0.454545	0.548872	1	1	P0-C-A-N	4.7826	8.4e-19	1	5.66e-08	5.01e-10	1.77e-09	4.69e-12	0.276
D907_N	con20_jockey	3R	20231969	20231990	0.59292	0.564516	1	1	P0-C-A-N	15.3318	2.06e-18	1	7.32e-10	4.44e-09	2.8e-10	1.39e-09	0.893
D907_N	con48_roo	3R	28282421	28282431	0.395833	0.522727	1	1	P0-C-A-N	3.76119	6.11e-18	1	3.46e-07	5.19e-10	1.82e-08	1.13e-11	0.253
D907_N	con48_roo	3R	24216087	24216093	0.468531	0.555556	1	1	P0-C-A-N	5.10708	6.19e-18	1	1.28e-07	1.46e-10	3.36e-08	3.92e-11	0.407
D907_N	con25_opus	3R	12452991	12453011	0.260606	0.030303	0.430464	0.148325	P0-C-A-N	0.512464	6.56e-18	4.96e-07	1.93e-17	0.0107	7.9e-05	0.0158	2.61e-09
D907_N	con14_Rt1a	3R	22871200	22871225	0.492308	0.487179	1	1	P0-C-A-N	99.9846	7.19e-18	1	3.9e-10	3.9e-10	3.75e-09	3.75e-09	1
D907_N	con20_jockey	3R	28662507	28662539	0.281553	0.435294	1	1	P0-C-A-N	3.6731	8.3e-18	1	6.42e-07	1.04e-10	9.82e-08	1.03e-11	0.091
D907_N	con11_hopper	3R	29876982	29877010	0.543624	0.606299	1	1	P0-C-A-N	6.28163	1.29e-17	1	3.12e-09	4.32e-11	1.14e-07	2.38e-09	0.536
D907_N	con48_roo	3R	10990785	10990805	0.241935	0.172932	1	0.230769	P0-C-A-N	0.838181	1.73e-17	9.74e-13	2.05e-16	1.75e-13	0.427	1	0.358
D907_N	con41_UnFmcl001_RLX-incomp	3R	21969137	21969147	0.473684	0.660377	1	1	P0-C-A-N	1.81915	2.22e-17	1	1.57e-06	3.09e-11	1.57e-06	3.09e-11	0.034
D907_N	con46_297	3R	17954264	17954282	0.488	0.517857	1	1	P0-C-A-N	16.1484	2.76e-17	1	1.21e-08	2.03e-09	3.1e-09	7.2e-10	0.901
D907_N	con43_H	3R	24395439	24395465	0.568345	0.54	1	1	P0-C-A-N	16.2286	6.76e-17	1	3.48e-09	3.48e-09	3.48e-09	3.48e-09	0.893
D907_N	con25_1360	2R	8086915	8087172	1	1	0.162162	1	P0-C-A-N	NA	1.7e-16	1.32e-07	1.4e-08	1.47e-09	1	1	1
D907_N	con25_opus	3R	12021460	12021468	0.552941	0.326733	1	0.380952	P0-C-A-N	0.239686	2.24e-16	2.76e-12	9e-15	5.46e-08	0.591	0.11	0.0195
D907_N	con23_copia	3R	14225112	14225292	0.309353	0.15	1	0.394495	P0-C-A-N	1.5343	2.77e-16	1.59e-08	1.31e-16	5.58e-11	0.000333	0.277	0.0101
D907_N	con41_UnFmcl001_RLX-incomp	3R	31231242	31231271	0.403846	0.6875	1	1	P0-C-A-N	1.10169	2.87e-16	1	8.04e-05	6.87e-11	8.04e-05	6.87e-11	0.00176
D907_N	con48_roo	3R	22226626	22226640	0.378151	0.456522	1	1	P0-C-A-N	6.93468	3.14e-16	1	1.22e-07	8.73e-10	1.22e-07	8.73e-10	0.485
D907_N	con26_I-element	3R	28075391	28075413	0.552	0.565217	1	1	P0-C-A-N	32.8957	5.24e-16	1	3.72e-08	5.82e-09	3.32e-08	5.82e-09	1
D907_N	con42_mdg1	3R	31157395	31157412	0.527027	0.548387	1	1	P0-C-A-N	21.1429	6.08e-16	1	1.28e-08	1.99e-09	8.04e-08	1.31e-08	1
D907_N	con42_mdg1	3R	24260536	24260573	0.57377	0.588235	1	1	P0-C-A-N	28.4663	9.95e-16	1	2.04e-08	8.16e-09	5.49e-08	1.95e-08	1
D907_N	con48_roo	3R	22258639	22258652	0.478992	0.613636	1	1	P0-C-A-N	2.86952	1.72e-15	1	1.34e-06	3.88e-10	7.86e-06	3.24e-09	0.197
D907_N	con21_springer	3R	20944815	20945087	0.154762	0.104294	1	0.246575	P0-C-A-N	2.81923	2.82e-15	2.02e-09	6.42e-15	8.76e-13	0.00466	0.105	0.226
D907_N	con11_hopper	3R	25416945	25416964	0.548387	0.593496	1	1	P0-C-A-N	9.01159	2.89e-15	1	3.14e-07	3.4e-08	3.4e-08	4.57e-09	0.756
D907_N	con48_roo	3R	22260278	22260288	0.47619	0.436893	1	1	P0-C-A-N	14.3295	4.1e-15	1	1.06e-08	1.1e-07	1.06e-08	1.1e-07	0.868
D907_N	con13_diver	3R	12134452	12134469	0.345455	0.121212	1	0.375	P0-C-A-N	1.13175	5.5e-15	8.14e-07	2.18e-15	9.96e-08	0.000261	0.726	0.000355
D907_N	con12_Doc	3R	19220478	19220496	0.625	0.672727	1	1	P0-C-A-N	6.85719	1.37e-14	1	4.76e-07	1.71e-08	5.72e-07	1.71e-08	0.734
D907_N	con26_Tirant	3R	28619940	28619988	0.462185	0.478261	1	1	P0-C-A-N	32.4545	2.22e-14	1	1.16e-07	3.63e-08	1.17e-07	3.63e-08	1
D907_N	con26_I-element	3R	22771171	22771208	0.417476	0.549296	1	1	P0-C-A-N	3.41909	6.61e-14	1	3.98e-06	5.93e-09	1.88e-05	3.45e-08	0.233
D907_N	con48_roo	3L	1215557	1215571	0.421053	0.342466	0.862069	0.24	P0-C-A-N	-1.30385	7.36e-14	9.3e-14	1.31e-09	1.58e-06	0.132	0.0144	0.294
D907_N	con26_I-element	3R	25197656	25197674	0.494949	0.656566	1	1	P0-C-A-N	2.12499	1.18e-13	1	1.31e-05	7.5e-09	1.86e-05	1.94e-08	0.088
D907_N	con48_roo	3R	18706326	18706342	0.370787	0.486486	1	1	P0-C-A-N	4.43836	1.3e-13	1	4.28e-06	2.13e-08	4.28e-06	2.8e-08	0.308
D907_N	con48_roo	3R	29612811	29612817	0.488889	0.486239	1	1	P0-C-A-N	193.872	1.53e-13	1	2.26e-07	2.26e-07	2.02e-07	2.26e-07	1
D907_N	con46_297	X	10311138	10311343	1	1	1	0.624242	P0-C-A-N	NA	3.16e-13	1.35e-06	1	1	6.18e-07	1.35e-06	1
D907_N	con20_jockey	3R	26253577	26253795	0.432432	0.431579	0.939394	1	P0-C-A-N	666.379	4.04e-13	0.604	2.56e-07	8.68e-07	2.49e-07	2.56e-07	1
D907_N	con20_jockey	3R	19939149	19939173	0.373913	0.604396	1	0.966667	P0-C-A-N	1.57179	4.31e-13	1	0.000366	2.63e-08	0.000202	3.99e-09	0.0127
D907_N	con20_jockey	3R	24566220	24566242	0.747126	0.603774	1	1	P0-C-A-N	2.76401	5.87e-13	1	4.17e-08	8.26e-05	3.3e-08	6.7e-05	0.14
D907_N	con26_Tirant	3R	24203872	24203888	0.647059	0.653061	1	1	P0-C-A-N	57.8039	6.58e-13	1	5.22e-07	5.22e-07	1.02e-06	8.28e-07	1
D907_N	con48_roo	2L	5490186	5490391	0.671233	0.661017	0.29927	1	P0-C-A-N	33.1816	1.64e-12	1.66e-11	0.00028	6.78e-05	0.00143	0.00143	1
D907_N	con25_opus	3R	27196624	27196774	0.513514	0.688889	1	1	P0-C-A-N	1.77398	4.55e-12	1	0.00017	9.27e-08	0.000155	6.24e-08	0.0829
D907_N	con24_Transpac	3R	29473056	29473149	0.521739	0.649485	1	1	P0-C-A-N	2.74384	2.15e-11	1	2.5e-05	4.16e-07	5.01e-05	9.96e-07	0.23
D907_N	con41_UnFmcl001_RLX-incomp	3R	7113601	7113624	0.758242	0.971429	0.391304	0.553191	P0-C-A-N	-1.96184	2.58e-11	0.0546	1.72e-10	2.9e-05	8.19e-06	0.0343	0.00887
D907_N	con13_UnFmcl013_RLX-incomp	3R	8115342	8115547	0.72973	0.80198	0.321637	0.629032	P0-C-A-N	-2.39374	3.75e-11	4.04e-05	2.65e-09	1.5e-07	0.0536	0.256	0.395
D907_N	con41_UnFmcl001_RLX-incomp	3L	11141041	11141058	0.41844	0.454545	1	0.282051	P0-C-A-N	-4.77757	5.92e-11	2.53e-11	1.03e-06	3.9e-08	0.0772	0.0794	0.734
D907_N	con20_jockey	3R	30898783	30898808	0.608247	0.636364	1	1	P0-C-A-N	12.933	1.53e-10	1	6.45e-06	2.24e-06	3.24e-05	1.2e-05	1
D907_N	con15_Rt1b	2R	14712005	14712210	1	0.280702	0.358209	0.304965	P0-C-A-N	0.0337315	2.06e-10	0.553	0.413	1.22e-08	0.754	6.81e-10	6.81e-10
D907_N	con48_roo	X	17327391	17327411	0.484848	1	1	1	P0-C-A-N	0	1.63e-09	1	1	1.7e-05	1	0.000168	0.000256
D907_N	con9_Bari1	3L	16364073	16364102	0.170306	0.0531401	0.282609	0.279503	P0-C-A-N	1.93199	2.38e-09	1	4.54e-08	0.0267	6.99e-08	0.0337	0.000462
D907_N	con22_S-element	3L	10897761	10897995	1	0.642384	1	1	P0-C-A-N	1	3.64e-09	1	0.000191	1	0.000191	1	5.58e-05
D907_N	con8_G2	3R	6915264	6915305	0.791045	0.875	0.442177	0.764706	P0-C-A-N	-1.31373	5.05e-09	2.78e-05	1.17e-07	7.17e-06	0.186	0.846	0.304
D907_N	con15_pogo	3R	8219178	8219202	0.461538	0.709091	0.167883	0.409091	P0-C-A-N	-1.21186	7.06e-09	0.00115	1.3e-08	7.35e-05	0.00992	0.601	0.0295
D907_N	con15_Rt1b	2L	8628926	8629114	0.358491	0.3625	1	0.329114	P0-C-A-N	-8.32776	7.45e-09	1.01e-08	1.97e-08	1.01e-08	0.84	0.84	1
D907_N	con23_copia	3R	9136294	9136307	0.755556	0.873684	0.375	0.72973	P0-C-A-N	-1.21863	7.54e-09	4.2e-05	3.31e-08	4.2e-05	0.099	0.833	0.161
D907_N	con13_UnFmcl013_RLX-incomp	X	16990449	16990480	0.365079	0.557377	0.528455	0.171429	P0-C-A-N	-2.00703	8.93e-09	5.85e-07	0.752	0.0397	1.09e-07	0.0035	0.0208
D907_N	con14_F-element	3R	8594574	8594597	0.645161	0.8	0.376344	0.672131	P0-C-A-N	-0.825819	3.8e-08	0.000132	2.9e-07	0.000342	0.139	0.863	0.0834
D907_N	con20_Burdock	3R	7492582	7492586	0.757009	0.934783	0.454545	0.685185	P0-C-A-N	-1.40402	8.34e-08	0.0144	5.32e-08	0.00116	0.00292	0.428	0.02
D907_N	con20_jockey	3L	7425874	7426063	1	1	0.621622	1	P0-C-A-N	NA	8.41e-08	0.000112	0.000112	0.000112	1	1	1
D907_N	con20_jockey	3R	8688905	8688936	0.111111	0.0614035	0.273632	0.125749	P0-C-A-N	1.29448	1.29e-07	0.0032	1.22e-07	0.000507	0.0612	0.732	0.122
D907_N	con12_Doc	3R	7665642	7665673	0.131579	0.0333333	0.277311	0.129412	P0-C-A-N	0.977943	2.24e-07	0.00774	6.18e-08	0.00894	0.00484	1	0.00484
D907_N	con48_roo	X	7807625	7807652	0.258065	0.311475	0.0645161	0.148649	P0-C-A-N	-3.04861	2.78e-07	0.0327	1.49e-06	5.28e-05	0.0114	0.0558	0.428
D907_N	con20_jockey	3R	26655484	26655690	0.430657	0.582609	0.245283	0.287234	P0-C-A-N	-1.94387	7.25e-07	0.445	4.06e-06	0.0043	7.56e-05	0.0441	0.0766
D907_N	con15_pogo	3L	7842573	7842871	0.323308	0.480916	0.152542	0.494737	P0-C-A-N	0.0876922	9.16e-07	1.05e-05	9.3e-06	0.0101	1	0.0444	0.0444
D907_N	con26_BS	3L	14396759	14397034	0.407407	0.0956522	0.526316	0.405405	P0-C-A-N	0.993578	1.02e-06	0.622	1.54e-05	0.649	0.000855	1	0.00212
D907_N	con33_P-element	3R	7102752	7103076	0.47541	0.684211	0.20339	0.428571	P0-C-A-N	-1.22432	2.24e-06	0.0145	1.85e-06	0.00615	0.058	0.828	0.121
D907_N	con42_mdg1	3R	27882834	27882845	0.702703	0.74026	1	1	P0-C-A-N	6.91589	2.42e-06	1	0.00217	0.00182	0.00217	0.00127	0.976
D907_N	con48_roo	3L	2323127	2323181	1	1	0.307692	0.466667	P0-C-A-N	NA	4.93e-06	0.266	0.000738	0.000331	0.0139	0.00812	1
D907_N	con11_hopper	2L	17547781	17547846	1	0.8	1	0.777778	P0-C-A-N	-0.11111	6.66e-06	0.00227	0.00342	1	1	0.00227	0.00342
D907_N	con21_Ivk	2L	3174644	3174911	0.222222	0.393939	0.0408163	0.0701754	P0-C-A-N	-1.88545	7.08e-06	0.542	7.92e-05	0.00992	0.000345	0.0406	0.283
D907_N	con15_pogo	X	6213343	6213646	0.327731	0.287671	0.804878	0.274725	P0-C-A-N	-0.323165	1.02e-05	2.77e-05	5.64e-05	5.64e-05	1	0.74	0.856
D907_N	con48_roo	3L	16555121	16555133	0.55102	0.840909	0.421053	0.5	P0-C-A-N	-1.176	1.17e-05	0.494	1.69e-05	0.202	0.000453	0.604	0.00336
D907_N	con26_I-element	3L	16013384	16013565	0.123077	0.0441176	0.27619	0.184	P0-C-A-N	1.77157	1.74e-05	0.196	2.05e-05	0.0216	0.00228	0.263	0.0537
D907_N	con41_UnFmcl001_RLX-incomp	3R	7491814	7491840	0.0652174	0.0555556	0.216374	0.134146	P0-C-A-N	8.13414	2.23e-05	0.104	0.000161	0.000396	0.0398	0.0861	0.822
D907_N	con19_Quasimodo	3R	9300328	9300331	0.82906	0.877551	0.539683	0.731092	P0-C-A-N	-3.02033	4.16e-05	0.0356	0.000169	0.000855	0.102	0.253	0.603
D907_N	con26_BS	3R	9285674	9285696	0.333333	0.666667	0.204301	0.45	P0-C-A-N	-0.65	5.33e-05	0.00897	5.9e-05	0.146	0.113	0.253	0.00936
D907_N	con24_Transpac	3R	8929308	8929335	0.714286	0.806452	0.445378	0.734694	P0-C-A-N	-0.778573	5.6e-05	0.00272	0.000192	0.00272	0.593	0.842	0.428
D907_N	con10_3S18	3R	8227417	8227435	0.653846	0.681159	0.37037	0.384615	P0-C-A-N	-10.8572	0.000105	0.869	0.00392	0.00392	0.00393	0.00392	0.869
D907_N	con14_F-element	3R	8928499	8928567	0.102041	0.0726257	0.224242	0.205128	P0-C-A-N	4.50454	0.000133	0.765	0.0016	0.00982	0.0033	0.0229	0.419
D907_N	con2_NOF	3R	26968424	26968636	0.16	0.204969	0.239264	0.396226	P0-C-A-N	4.25309	0.000178	0.0184	0.556	0.184	0.00396	0.000295	0.51
D907_N	con48_roo	3R	6875942	6876010	0.0930233	0.170732	0.229508	0.0694444	P0-C-A-N	-1.30343	0.00113	0.004	0.458	0.0134	0.033	0.525	0.134
D907_N	con25_1360	3R	9106035	9106239	0.0188679	0.0273224	0.109756	0.0416667	P0-C-A-N	1.69665	0.0018	0.0412	0.0102	0.0102	0.684	0.525	0.726
D907_N	con26_BS	2L	1922500	1922667	0.366337	0.648649	0.590909	0.689655	P0-C-A-N	0.145251	0.00292	0.65	0.748	0.112	0.812	0.00954	0.00954
D907_N	con48_roo	3R	6897841	6897851	0.136842	0.0833333	0.247525	0.230769	P0-C-A-N	2.75536	0.00732	0.846	0.0165	0.158	0.0261	0.294	0.302
D907_N	con25_1360	3R	7492424	7492455	0.52	0.649123	0.393939	0.323944	P0-C-A-N	-2.51837	0.0155	0.535	0.0822	0.44	0.0294	0.163	0.44
D907_N	con23_copia	3R	6813675	6813699	0.553957	0.46	0.372881	0.62963	P0-C-A-N	1.8054	0.0165	0.0319	0.392	0.0642	0.191	0.479	0.388
D907_N	con25_1360	X	14045751	14045956	0.0272727	0.0106383	0.0686275	0.0280374	P0-C-A-N	1.04597	0.0199	0.129	0.0243	0.129	0.354	1	0.354
D907_N	con48_roo	3R	6831713	6831722	0.639344	0.412844	0.45	0.541667	P0-C-A-N	0.568755	0.0232	0.383	0.749	0.0717	0.348	0.383	0.0486
D907_N	con14_F-element	3R	26649654	26649935	0.436508	0.446281	0.474684	0.562044	P0-C-A-N	11.8452	0.073	0.208	0.726	0.711	0.116	0.116	0.913
D907_N	con14_F-element	3L	6519367	6519387	0.980952	1	0.944954	1	P0-C-A-N	0	0.0848	0.738	0.654	0.745	1	0.745	0.745
D907_N	con26_Tirant	2R	6605774	6605980	0.210811	0.333333	0.323529	0.289941	P0-C-A-N	-0.354157	0.112	0.803	1	0.137	0.803	0.266	0.137
D907_N	con20_Burdock	2L	15595922	15595950	0.981481	1	1	0.963303	P0-C-A-N	-1.98159	0.146	0.726	1	0.74	0.726	1	0.74
D907_N	con20_jockey	2R	15731879	15732067	0.398496	0.347368	0.476636	0.329412	P0-C-A-N	-0.351197	0.172	0.25	0.25	0.525	0.797	0.525	0.594
D907_N	con20_jockey	2R	6829602	6829618	1	0.977273	1	1	P0-C-A-N	1	0.199	1	0.936	1	0.936	1	0.936
D907_N	con20_jockey	2L	15778072	15778282	1	1	0.978495	1	P0-C-A-N	NA	0.224	0.994	0.994	0.994	1	1	1
D907_N	con15_flea	2L	13534856	13534880	0.960396	1	1	0.960396	P0-C-A-N	-1	0.286	0.69	1	0.69	0.748	1	0.748
D907_N	con15_pogo	3L	16803525	16803830	0.290909	0.333333	0.22963	0.329193	P0-C-A-N	-0.0975863	0.324	0.408	0.408	0.775	1	0.775	0.775
D907_N	con33_P-element	3R	8093822	8094010	0.666667	1	1	1	P0-C-A-N	0	0.357	1	1	1	1	1	1
D907_N	con33_P-element	X	6908276	6908476	0.939394	0.923077	1	0.783784	P0-C-A-N	-8.53668	0.372	0.756	1	1	0.756	0.756	1
D907_N	con15_flea	3L	1085777	1085852	1	0.909091	0.957447	1	P0-C-A-N	1	0.406	1	1	1	1	1	1
D907_N	con8_G2	3L	16691345	16691533	0.194444	0.22807	0.229358	0.159236	P0-C-A-N	-2.04705	0.495	0.696	1	0.736	0.696	0.736	0.736
D907_N	con25_1360	2L	7872767	7872972	0.0566038	0.0243902	0.0555556	0.0222222	P0-C-A-N	-0.0673008	0.532	0.692	0.692	1	1	0.692	0.692
D907_N	con15_pogo	X	13752236	13752518	0.273885	0.224138	0.213333	0.280702	P0-C-A-N	1.13703	0.565	0.648	1	0.648	0.648	1	0.648
D907_N	con2_NOF	X	2766343	2766723	0.545455	0.477612	0.47619	0.435115	P0-C-A-N	-0.626402	0.581	0.786	1	0.786	0.786	0.786	0.786
D907_N	con22_S-element	3L	16973420	16973433	0.925	0.936842	0.972603	0.975309	P0-C-A-N	3.24835	0.65	1	0.948	0.948	0.948	0.948	1
D907_N	con33_P-element	X	15297880	15298039	0.948718	1	1	1	P0-C-A-N	0	0.707	1	1	1	1	1	1
D907_N	con41_UnFmcl001_RLX-incomp	X	2023763	2023772	0.371429	0.382488	0.336134	0.333333	P0-C-A-N	-4.4448	0.727	1	0.847	0.847	0.847	0.847	1
D907_N	con20_jockey	2L	1258717	1258752	1	1	0.974026	1	P0-C-A-N	NA	0.727	1	1	1	1	1	1
D907_N	BDGP_baggins	3R	8350789	8351026	0.0680272	0.0578512	0.057554	0.0493274	P0-C-A-N	-0.837638	0.865	1	1	1	1	1	1
D907_N	con15_pogo	2L	18729448	18729575	0.435028	0.428571	0.439024	0.451852	P0-C-A-N	3.60554	0.99	1	1	1	1	1	1
D907_N	con10_3S18	2R	11338962	11338975	1	1	1	1	P0-C-A-N	NA	1	1	1	1	1	1	1
D907_N	con10_3S18	2R	20654213	20654230	1	1	1	1	P0-C-A-N	NA	1	1	1	1	1	1	1
D907_N	con10_3S18	3L	1849365	1849375	1	1	1	1	P0-C-A-N	NA	1	1	1	1	1	1	1
D907_N	con10_3S18	3L	2515431	2515446	1	1	1	1	P0-C-A-N	NA	1	1	1	1	1	1	1
D907_N	con10_3S18	3L	3001334	3001346	1	1	1	1	P0-C-A-N	NA	1	1	1	1	1	1	1
D907_N	con10_3S18	3L	6158856	6158866	1	1	1	1	P0-C-A-N	NA	1	1	1	1	1	1	1
D907_N	con10_3S18	X	12631511	12631519	1	1	1	1	P0-C-A-N	NA	1	1	1	1	1	1	1
D907_N	con10_Idefix	2L	1788684	1788713	1	1	1	1	P0-C-A-N	NA	1	1	1	1	1	1	1
D907_N	con11_hopper	2L	2345697	2345709	1	1	1	1	P0-C-A-N	NA	1	1	1	1	1	1	1
D907_N	con11_hopper	2R	13664150	13664163	1	1	1	1	P0-C-A-N	NA	1	1	1	1	1	1	1
D907_N	con11_hopper	2R	18028369	18028389	1	1	1	1	P0-C-A-N	NA	1	1	1	1	1	1	1
D907_N	con11_hopper	3L	12301232	12301239	1	1	1	1	P0-C-A-N	NA	1	1	1	1	1	1	1
D907_N	con11_hopper	3L	12721742	12721753	1	1	1	1	P0-C-A-N	NA	1	1	1	1	1	1	1
D907_N	con11_hopper	X	14568926	14568947	1	1	1	1	P0-C-A-N	NA	1	1	1	1	1	1	1
D907_N	con11_hopper	X	14989298	14989327	1	1	1	1	P0-C-A-N	NA	1	1	1	1	1	1	1
D907_N	con11_hopper	X	15259638	15259648	1	1	1	1	P0-C-A-N	NA	1	1	1	1	1	1	1
D907_N	con11_hopper	X	17046557	17046579	1	1	1	1	P0-C-A-N	NA	1	1	1	1	1	1	1
D907_N	con11_hopper	X	20083507	20083519	1	1	1	1	P0-C-A-N	NA	1	1	1	1	1	1	1
D907_N	con12_Doc	2L	14555825	14555861	1	1	1	1	P0-C-A-N	NA	1	1	1	1	1	1	1
D907_N	con12_Doc	2R	17939686	17939702	1	1	1	1	P0-C-A-N	NA	1	1	1	1	1	1	1
D907_N	con12_Doc	2R	20291322	20291337	1	1	1	1	P0-C-A-N	NA	1	1	1	1	1	1	1
D907_N	con12_Doc	3L	2146412	2146426	1	1	1	1	P0-C-A-N	NA	1	1	1	1	1	1	1
D907_N	con12_Doc	3L	9943656	9943674	1	1	1	1	P0-C-A-N	NA	1	1	1	1	1	1	1
D907_N	con12_Doc	3R	16557990	16558024	1	1	1	1	P0-C-A-N	NA	1	1	1	1	1	1	1
D907_N	con12_Doc	X	3806457	3806476	1	1	1	1	P0-C-A-N	NA	1	1	1	1	1	1	1
D907_N	con12_Doc	X	18410347	18410360	1	1	1	1	P0-C-A-N	NA	1	1	1	1	1	1	1
D907_N	con13_UnFmcl013_RLX-incomp	2L	2851528	2851559	1	1	1	1	P0-C-A-N	NA	1	1	1	1	1	1	1
D907_N	con13_UnFmcl013_RLX-incomp	2R	22571769	22571790	1	1	1	1	P0-C-A-N	NA	1	1	1	1	1	1	1
D907_N	con13_UnFmcl013_RLX-incomp	3L	17997413	17997435	1	1	1	1	P0-C-A-N	NA	1	1	1	1	1	1	1
D907_N	con13_UnFmcl013_RLX-incomp	X	6095005	6095022	1	1	1	1	P0-C-A-N	NA	1	1	1	1	1	1	1
D907_N	con13_UnFmcl013_RLX-incomp	X	12263731	12263770	1	1	1	1	P0-C-A-N	NA	1	1	1	1	1	1	1
D907_N	con13_diver	2R	13127590	13127605	1	1	1	1	P0-C-A-N	NA	1	1	1	1	1	1	1
D907_N	con14_F-element	2L	11044302	11044311	1	1	1	1	P0-C-A-N	NA	1	1	1	1	1	1	1
D907_N	con14_F-element	2L	13342201	13342218	1	1	1	1	P0-C-A-N	NA	1	1	1	1	1	1	1
D907_N	con14_F-element	2L	15128524	15128538	1	1	1	1	P0-C-A-N	NA	1	1	1	1	1	1	1
D907_N	con14_F-element	2L	17645937	17645953	1	1	1	1	P0-C-A-N	NA	1	1	1	1	1	1	1
D907_N	con14_F-element	2L	18477101	18477120	1	1	1	1	P0-C-A-N	NA	1	1	1	1	1	1	1
D907_N	con14_F-element	2R	6681722	6681735	1	1	1	1	P0-C-A-N	NA	1	1	1	1	1	1	1
D907_N	con14_F-element	2R	11030559	11030573	1	1	1	1	P0-C-A-N	NA	1	1	1	1	1	1	1
D907_N	con14_F-element	2R	17029306	17029328	1	1	1	1	P0-C-A-N	NA	1	1	1	1	1	1	1
D907_N	con14_F-element	2R	17257202	17257214	1	1	1	1	P0-C-A-N	NA	1	1	1	1	1	1	1
D907_N	con14_F-element	2R	19107394	19107420	1	1	1	1	P0-C-A-N	NA	1	1	1	1	1	1	1
D907_N	con14_F-element	3L	2691984	2692006	1	1	1	1	P0-C-A-N	NA	1	1	1	1	1	1	1
D907_N	con14_F-element	3L	5829271	5829304	1	1	1	1	P0-C-A-N	NA	1	1	1	1	1	1	1
D907_N	con14_F-element	3L	7990945	7990978	1	1	1	1	P0-C-A-N	NA	1	1	1	1	1	1	1
D907_N	con14_F-element	3L	13636417	13636426	1	1	1	1	P0-C-A-N	NA	1	1	1	1	1	1	1
D907_N	con14_F-element	3L	14559134	14559151	1	1	1	1	P0-C-A-N	NA	1	1	1	1	1	1	1
D907_N	con14_F-element	3L	17050358	17050374	1	1	1	1	P0-C-A-N	NA	1	1	1	1	1	1	1
D907_N	con14_Juan	3L	17706403	17706422	1	1	1	1	P0-C-A-N	NA	1	1	1	1	1	1	1
D907_N	con14_Juan	X	5216341	5216366	1	1	1	1	P0-C-A-N	NA	1	1	1	1	1	1	1
D907_N	con14_Rt1a	3L	17170912	17170945	1	1	1	1	P0-C-A-N	NA	1	1	1	1	1	1	1
D907_N	con14_Rt1a	X	9822764	9822782	1	1	1	1	P0-C-A-N	NA	1	1	1	1	1	1	1
D907_N	con15_Rt1b	2R	12113802	12113820	1	1	1	1	P0-C-A-N	NA	1	1	1	1	1	1	1
D907_N	con15_Rt1b	2R	15395414	15395419	1	1	1	1	P0-C-A-N	NA	1	1	1	1	1	1	1
D907_N	con15_Rt1b	3L	17697996	17698041	1	1	1	1	P0-C-A-N	NA	1	1	1	1	1	1	1
D907_N	con15_Rt1b	X	9342797	9342814	1	1	1	1	P0-C-A-N	NA	1	1	1	1	1	1	1
D907_N	con15_flea	2R	12809549	12809561	1	1	1	1	P0-C-A-N	NA	1	1	1	1	1	1	1
D907_N	con15_flea	3L	7952423	7952435	1	1	1	1	P0-C-A-N	NA	1	1	1	1	1	1	1
D907_N	con15_flea	3L	12986432	12986440	1	1	1	1	P0-C-A-N	NA	1	1	1	1	1	1	1
D907_N	con15_flea	3L	13714359	13714377	1	1	1	1	P0-C-A-N	NA	1	1	1	1	1	1	1
D907_N	con15_flea	X	20365258	20365265	1	1	1	1	P0-C-A-N	NA	1	1	1	1	1	1	1
D907_N	con15_pogo	2R	11394141	11394171	1	1	1	1	P0-C-A-N	NA	1	1	1	1	1	1	1
D907_N	con15_pogo	2R	14921529	14921538	1	1	1	1	P0-C-A-N	NA	1	1	1	1	1	1	1
D907_N	con15_pogo	3L	2426697	2426892	1	1	1	1	P0-C-A-N	NA	1	1	NA	1	NA	1	NA
D907_N	con15_pogo	3L	9858300	9858314	1	1	1	1	P0-C-A-N	NA	1	1	1	1	1	1	1
D907_N	con15_pogo	X	11221561	11221743	1	1	1	1	P0-C-A-N	NA	1	1	1	1	1	1	1
D907_N	con16_blood	2L	956183	956202	1	1	1	1	P0-C-A-N	NA	1	1	1	1	1	1	1
D907_N	con16_blood	2L	5672910	5672928	1	1	1	1	P0-C-A-N	NA	1	1	1	1	1	1	1
D907_N	con16_blood	2L	6021149	6021160	1	1	1	1	P0-C-A-N	NA	1	1	1	1	1	1	1
D907_N	con16_blood	2L	7596956	7596971	1	1	1	1	P0-C-A-N	NA	1	1	1	1	1	1	1
D907_N	con16_blood	2L	12753933	12753937	1	1	1	1	P0-C-A-N	NA	1	1	1	1	1	1	1
D907_N	con16_blood	2L	13310457	13310472	1	1	1	1	P0-C-A-N	NA	1	1	1	1	1	1	1
D907_N	con16_blood	2R	7195823	7195841	1	1	1	1	P0-C-A-N	NA	1	1	1	1	1	1	1
D907_N	con16_blood	2R	10763680	10763698	1	1	1	1	P0-C-A-N	NA	1	1	1	1	1	1	1
D907_N	con16_blood	2R	14414158	14414173	1	1	1	1	P0-C-A-N	NA	1	1	1	1	1	1	1
D907_N	con16_blood	3L	1074745	1074749	1	1	1	1	P0-C-A-N	NA	1	1	1	1	1	1	1
D907_N	con16_blood	X	2350610	2350621	1	1	1	1	P0-C-A-N	NA	1	1	1	1	1	1	1
D907_N	con17_Max-element	3R	12720512	12720545	1	1	1	1	P0-C-A-N	NA	1	1	1	1	1	1	1
D907_N	con17_rover	2R	7632048	7632061	1	1	1	1	P0-C-A-N	NA	1	1	1	1	1	1	1
D907_N	con19_Quasimodo	2L	12622110	12622128	1	1	1	1	P0-C-A-N	NA	1	1	1	1	1	1	1
D907_N	con19_Quasimodo	2L	15186489	15186524	1	1	1	1	P0-C-A-N	NA	1	1	1	1	1	1	1
D907_N	con19_Quasimodo	2R	21962649	21962674	1	1	1	1	P0-C-A-N	NA	1	1	1	1	1	1	1
D907_N	con19_Quasimodo	3L	3127435	3127450	1	1	1	1	P0-C-A-N	NA	1	1	1	1	1	1	1
D907_N	con19_Quasimodo	3L	16799008	16799033	1	1	1	1	P0-C-A-N	NA	1	1	1	1	1	1	1
D907_N	con19_Quasimodo	3L	16827741	16827755	1	1	1	1	P0-C-A-N	NA	1	1	1	1	1	1	1
D907_N	con19_Quasimodo	X	8037719	8037737	1	1	1	1	P0-C-A-N	NA	1	1	1	1	1	1	1
D907_N	con19_transib2	3R	14049385	14049400	1	1	1	1	P0-C-A-N	NA	1	1	1	1	1	1	1
D907_N	con20_Burdock	2L	2794221	2794234	1	1	1	1	P0-C-A-N	NA	1	1	1	1	1	1	1
D907_N	con20_Burdock	2R	13054001	13054198	1	1	1	1	P0-C-A-N	NA	1	1	1	1	1	1	1
D907_N	con20_Burdock	2R	13403541	13403566	1	1	1	1	P0-C-A-N	NA	1	1	1	1	1	1	1
D907_N	con20_Burdock	3L	10923109	10923120	1	1	1	1	P0-C-A-N	NA	1	1	1	1	1	1	1
D907_N	con20_HMS-Beagle	2R	11246421	11246437	1	1	1	1	P0-C-A-N	NA	1	1	1	1	1	1	1
D907_N	con20_HMS-Beagle	X	2663071	2663092	1	1	1	1	P0-C-A-N	NA	1	1	1	1	1	1	1
D907_N	con20_jockey	2L	16551458	16551468	1	1	1	1	P0-C-A-N	NA	1	1	1	1	1	1	1
D907_N	con20_jockey	2R	15306409	15306433	1	1	1	1	P0-C-A-N	NA	1	1	1	1	1	1	1
D907_N	con20_jockey	2R	18514146	18514168	1	1	1	1	P0-C-A-N	NA	1	1	1	1	1	1	1
D907_N	con20_jockey	2R	20840733	20840746	1	1	1	1	P0-C-A-N	NA	1	1	1	1	1	1	1
D907_N	con20_jockey	3L	2609062	2609100	1	1	1	1	P0-C-A-N	NA	1	1	1	1	1	1	1
D907_N	con20_jockey	3L	6630496	6630506	1	1	1	1	P0-C-A-N	NA	1	1	1	1	1	1	1
D907_N	con20_jockey	3L	7223024	7223049	1	1	1	1	P0-C-A-N	NA	1	1	1	1	1	1	1
D907_N	con20_jockey	3L	9787706	9787727	1	1	1	1	P0-C-A-N	NA	1	1	1	1	1	1	1
D907_N	con20_jockey	3L	10125478	10125506	1	1	1	1	P0-C-A-N	NA	1	1	1	1	1	1	1
D907_N	con20_jockey	3L	10644809	10644853	1	1	1	1	P0-C-A-N	NA	1	1	1	1	1	1	1
D907_N	con20_jockey	3L	10865643	10865665	1	1	1	1	P0-C-A-N	NA	1	1	1	1	1	1	1
D907_N	con20_jockey	3L	17936966	17936985	1	1	1	1	P0-C-A-N	NA	1	1	1	1	1	1	1
D907_N	con20_jockey	3L	18957201	18957227	1	1	1	1	P0-C-A-N	NA	1	1	1	1	1	1	1
D907_N	con20_jockey	3R	16068343	16068370	1	1	1	1	P0-C-A-N	NA	1	1	1	1	1	1	1
D907_N	con20_jockey	3R	17108985	17109015	1	1	1	1	P0-C-A-N	NA	1	1	1	1	1	1	1
D907_N	con20_jockey	X	2214118	2214310	1	1	1	1	P0-C-A-N	NA	1	1	1	1	1	1	1
D907_N	con20_jockey	X	3334980	3334996	1	1	1	1	P0-C-A-N	NA	1	1	1	1	1	1	1
D907_N	con20_jockey	X	9857907	9857929	1	1	1	1	P0-C-A-N	NA	1	1	1	1	1	1	1
D907_N	con20_jockey	X	10418719	10418745	1	1	1	1	P0-C-A-N	NA	1	1	1	1	1	1	1
D907_N	con20_jockey	X	14293667	14293687	1	1	1	1	P0-C-A-N	NA	1	1	1	1	1	1	1
D907_N	con20_jockey	X	14397357	14397391	1	1	1	1	P0-C-A-N	NA	1	1	1	1	1	1	1
D907_N	con20_jockey	X	14862594	14862623	1	1	1	1	P0-C-A-N	NA	1	1	1	1	1	1	1
D907_N	con20_jockey	X	15279814	15279838	1	1	1	1	P0-C-A-N	NA	1	1	1	1	1	1	1
D907_N	con20_jockey	X	18239229	18239253	1	1	1	1	P0-C-A-N	NA	1	1	1	1	1	1	1
D907_N	con21_Ivk	2L	10959217	10959247	1	1	1	1	P0-C-A-N	NA	1	1	1	1	1	1	1
D907_N	con21_Ivk	X	19367542	19367570	1	1	1	1	P0-C-A-N	NA	1	1	1	1	1	1	1
D907_N	con22_Stalker2	3L	17788792	17788799	1	1	1	1	P0-C-A-N	NA	1	1	1	1	1	1	1
D907_N	con22_Stalker2	3R	17362560	17362577	1	1	1	1	P0-C-A-N	NA	1	1	1	1	1	1	1
D907_N	con22_Stalker2	X	18742866	18742885	1	1	1	1	P0-C-A-N	NA	1	1	1	1	1	1	1
D907_N	con23_copia	2L	4583007	4583022	1	1	1	1	P0-C-A-N	NA	1	1	1	1	1	1	1
D907_N	con23_copia	2L	5600719	5600728	1	1	1	1	P0-C-A-N	NA	1	1	1	1	1	1	1
D907_N	con23_copia	2L	11578873	11578880	1	1	1	1	P0-C-A-N	NA	1	1	1	1	1	1	1
D907_N	con23_copia	2L	12143114	12143122	1	1	1	1	P0-C-A-N	NA	1	1	1	1	1	1	1
D907_N	con23_copia	2L	16227900	16227916	1	1	1	1	P0-C-A-N	NA	1	1	1	1	1	1	1
D907_N	con23_copia	2R	24434898	24434936	1	1	1	1	P0-C-A-N	NA	1	1	1	1	1	1	1
D907_N	con23_copia	3L	1377395	1377410	1	1	1	1	P0-C-A-N	NA	1	1	1	1	1	1	1
D907_N	con23_copia	X	5681177	5681189	1	1	1	1	P0-C-A-N	NA	1	1	1	1	1	1	1
D907_N	con23_copia	X	7056679	7056716	1	1	1	1	P0-C-A-N	NA	1	1	1	1	1	1	1
D907_N	con24_Transpac	2L	4867215	4867231	1	1	1	1	P0-C-A-N	NA	1	1	1	1	1	1	1
D907_N	con24_Transpac	2L	9204667	9204688	1	1	1	1	P0-C-A-N	NA	1	1	1	1	1	1	1
D907_N	con24_Transpac	3L	5962292	5962443	1	1	1	1	P0-C-A-N	NA	1	1	1	1	1	1	1
D907_N	con24_Transpac	X	13374555	13374578	1	1	1	1	P0-C-A-N	NA	1	1	1	1	1	1	1
D907_N	con24_X-element	2R	10442727	10442741	1	1	1	1	P0-C-A-N	NA	1	1	1	1	1	1	1
D907_N	con25_1360	2L	4912643	4912767	1	1	1	1	P0-C-A-N	NA	1	1	1	1	1	1	1
D907_N	con25_1360	2L	10402890	10402898	1	1	1	1	P0-C-A-N	NA	1	1	1	1	1	1	1
D907_N	con25_1360	2R	7247777	7247799	1	1	1	1	P0-C-A-N	NA	1	1	1	1	1	1	1
D907_N	con25_1360	2R	9968393	9968411	1	1	1	1	P0-C-A-N	NA	1	1	1	1	1	1	1
D907_N	con25_1360	2R	15374777	15374964	1	1	1	1	P0-C-A-N	NA	1	1	1	1	1	1	1
D907_N	con25_1360	X	21205030	21205113	1	1	1	1	P0-C-A-N	NA	1	1	1	1	1	1	1
D907_N	con25_opus	2L	11688987	11688995	1	1	1	1	P0-C-A-N	NA	1	1	1	1	1	1	1
D907_N	con25_opus	2L	17243611	17243634	1	1	1	1	P0-C-A-N	NA	1	1	1	1	1	1	1
D907_N	con25_opus	2R	18753248	18753279	1	1	1	1	P0-C-A-N	NA	1	1	1	1	1	1	1
D907_N	con25_opus	3L	1199288	1199325	1	1	1	1	P0-C-A-N	NA	1	1	1	1	1	1	1
D907_N	con25_opus	3L	2768555	2768574	1	1	1	1	P0-C-A-N	NA	1	1	1	1	1	1	1
D907_N	con26_BS	2L	16138732	16138941	1	1	1	1	P0-C-A-N	NA	1	1	1	1	1	1	1
D907_N	con26_BS	3L	8395237	8395245	1	1	0.980769	1	P0-C-A-N	NA	1	1	1	1	1	1	1
D907_N	con26_BS	X	15280195	15280212	1	1	1	1	P0-C-A-N	NA	1	1	1	1	1	1	1
D907_N	con26_BS	X	20258063	20258077	1	1	1	1	P0-C-A-N	NA	1	1	1	1	1	1	1
D907_N	con26_I-element	2L	2860432	2860443	1	1	1	1	P0-C-A-N	NA	1	1	1	1	1	1	1
D907_N	con26_I-element	2L	7712157	7712170	1	1	1	1	P0-C-A-N	NA	1	1	1	1	1	1	1
D907_N	con26_I-element	2L	15467008	15467059	1	1	1	1	P0-C-A-N	NA	1	1	1	1	1	1	1
D907_N	con26_I-element	2R	9663261	9663285	1	1	1	1	P0-C-A-N	NA	1	1	1	1	1	1	1
D907_N	con26_I-element	2R	9686043	9686075	1	1	1	1	P0-C-A-N	NA	1	1	1	1	1	1	1
D907_N	con26_I-element	2R	15937289	15937312	1	1	1	1	P0-C-A-N	NA	1	1	1	1	1	1	1
D907_N	con26_I-element	3L	8751420	8751437	1	1	1	1	P0-C-A-N	NA	1	1	1	1	1	1	1
D907_N	con26_I-element	X	13350681	13350706	1	1	1	1	P0-C-A-N	NA	1	1	1	1	1	1	1
D907_N	con26_I-element	X	14756823	14756856	1	1	1	1	P0-C-A-N	NA	1	1	1	1	1	1	1
D907_N	con26_Tirant	2L	11358550	11358574	1	1	1	1	P0-C-A-N	NA	1	1	1	1	1	1	1
D907_N	con26_Tirant	2L	17747469	17747473	1	1	1	1	P0-C-A-N	NA	1	1	1	1	1	1	1
D907_N	con26_Tirant	2R	11597681	11597696	1	1	1	1	P0-C-A-N	NA	1	1	1	1	1	1	1
D907_N	con26_Tirant	2R	16151639	16151643	1	1	1	1	P0-C-A-N	NA	1	1	1	1	1	1	1
D907_N	con26_Tirant	3L	10138201	10138213	1	1	1	1	P0-C-A-N	NA	1	NA	1	1	NA	NA	1
D907_N	con26_Tirant	X	21145762	21145779	1	1	1	1	P0-C-A-N	NA	1	1	1	1	1	1	1
D907_N	con26_mdg3	2L	3880328	3880338	1	1	1	1	P0-C-A-N	NA	1	1	1	1	1	1	1
D907_N	con26_mdg3	2R	17883552	17883587	1	1	1	1	P0-C-A-N	NA	1	1	1	1	1	1	1
D907_N	con26_mdg3	3R	16415450	16415468	1	1	1	1	P0-C-A-N	NA	1	1	1	1	1	1	1
D907_N	con26_mdg3	X	4264789	4264800	1	1	1	1	P0-C-A-N	NA	1	1	1	1	1	1	1
D907_N	con26_mdg3	X	12055183	12055320	1	1	1	1	P0-C-A-N	NA	1	1	1	1	1	1	1
D907_N	con26_mdg3	X	17038940	17038959	1	1	1	1	P0-C-A-N	NA	1	1	1	1	1	1	1
D907_N	con33_17-6	3L	11818970	11819201	1	1	1	1	P0-C-A-N	NA	1	1	1	1	1	1	1
D907_N	con33_17-6	X	12133260	12133458	1	1	1	1	P0-C-A-N	NA	1	1	1	1	1	1	1
D907_N	con33_P-element	2L	2885054	2885235	1	1	1	1	P0-C-A-N	NA	1	1	1	1	1	1	1
D907_N	con33_P-element	2L	7437405	7437432	1	1	1	1	P0-C-A-N	NA	1	1	NA	1	NA	1	NA
D907_N	con33_P-element	2L	9125724	9125783	1	1	1	1	P0-C-A-N	NA	1	1	1	1	1	1	1
D907_N	con33_P-element	2L	9387585	9387606	1	1	1	1	P0-C-A-N	NA	1	1	1	1	1	1	1
D907_N	con33_P-element	2L	12007272	12007287	1	1	1	1	P0-C-A-N	NA	1	1	1	1	1	1	1
D907_N	con33_P-element	2L	16685187	16685277	1	1	1	1	P0-C-A-N	NA	1	1	1	1	1	1	1
D907_N	con33_P-element	2R	10618456	10618472	1	1	1	1	P0-C-A-N	NA	1	1	1	1	1	1	1
D907_N	con33_P-element	2R	13622992	13623026	1	1	1	1	P0-C-A-N	NA	1	1	1	1	1	1	1
D907_N	con33_P-element	2R	19832399	19832422	1	1	1	1	P0-C-A-N	NA	1	1	1	1	1	1	1
D907_N	con33_P-element	3L	3757908	3758099	1	1	1	1	P0-C-A-N	NA	1	1	1	1	1	1	1
D907_N	con33_P-element	X	18356297	18356320	1	1	1	1	P0-C-A-N	NA	1	1	1	1	1	1	1
D907_N	con41_UnFmcl001_RLX-incomp	2L	2889900	2889915	1	1	1	1	P0-C-A-N	NA	1	1	1	1	1	1	1
D907_N	con41_UnFmcl001_RLX-incomp	2L	11467872	11467896	1	1	1	1	P0-C-A-N	NA	1	1	1	1	1	1	1
D907_N	con41_UnFmcl001_RLX-incomp	2L	12265751	12265770	1	1	1	1	P0-C-A-N	NA	1	1	1	1	1	1	1
D907_N	con41_UnFmcl001_RLX-incomp	3L	13635944	13636051	1	1	1	1	P0-C-A-N	NA	1	1	1	1	1	1	1
D907_N	con41_UnFmcl001_RLX-incomp	3L	15547710	15547715	1	1	1	1	P0-C-A-N	NA	1	1	1	1	1	1	1
D907_N	con41_UnFmcl001_RLX-incomp	X	15042303	15042320	1	1	1	1	P0-C-A-N	NA	1	1	1	1	1	1	1
D907_N	con41_UnFmcl001_RLX-incomp	X	15313389	15313405	1	1	1	1	P0-C-A-N	NA	1	1	1	1	1	1	1
D907_N	con41_UnFmcl001_RLX-incomp	X	18752400	18752409	1	1	1	1	P0-C-A-N	NA	1	1	1	1	1	1	1
D907_N	con41_UnFmcl001_RLX-incomp	X	19355372	19355391	1	1	1	1	P0-C-A-N	NA	1	1	1	1	1	1	1
D907_N	con42_mdg1	2L	12332646	12332687	1	1	1	1	P0-C-A-N	NA	1	1	1	1	1	1	1
D907_N	con42_mdg1	2R	8159093	8159104	1	1	1	1	P0-C-A-N	NA	1	1	1	1	1	1	1
D907_N	con42_mdg1	2R	16693960	16693987	1	1	1	1	P0-C-A-N	NA	1	1	1	1	1	1	1
D907_N	con42_mdg1	2R	16895896	16895913	1	1	1	1	P0-C-A-N	NA	1	1	1	1	1	1	1
D907_N	con42_mdg1	2R	24851811	24851815	1	1	1	1	P0-C-A-N	NA	1	1	1	1	1	1	1
D907_N	con42_mdg1	3L	14822885	14822898	1	1	1	1	P0-C-A-N	NA	1	1	1	1	1	1	1
D907_N	con43_H	2L	3890592	3890614	1	1	1	1	P0-C-A-N	NA	1	1	1	1	1	1	1
D907_N	con43_H	2L	7435639	7435664	1	1	1	1	P0-C-A-N	NA	1	1	1	1	1	1	1
D907_N	con43_H	2L	9021133	9021155	1	1	1	1	P0-C-A-N	NA	1	1	1	1	1	1	1
D907_N	con43_H	2L	12817190	12817203	1	1	1	1	P0-C-A-N	NA	1	1	1	NA	1	NA	NA
D907_N	con43_H	2L	17208709	17208725	1	1	1	1	P0-C-A-N	NA	1	1	1	1	1	1	1
D907_N	con43_H	2R	10723549	10723586	1	1	1	1	P0-C-A-N	NA	1	1	1	1	1	1	1
D907_N	con43_H	2R	11030059	11030071	1	1	1	1	P0-C-A-N	NA	1	1	1	1	1	1	1
D907_N	con43_H	2R	13673991	13673999	1	1	1	1	P0-C-A-N	NA	1	1	1	1	1	1	1
D907_N	con43_H	2R	22796798	22796806	1	1	1	1	P0-C-A-N	NA	1	1	1	1	1	1	1
D907_N	con43_H	3L	4596465	4596511	1	1	1	1	P0-C-A-N	NA	1	1	1	1	1	1	1
D907_N	con43_H	3L	4924420	4924437	1	1	1	1	P0-C-A-N	NA	1	1	1	1	1	1	1
D907_N	con43_H	3L	17294578	17294591	1	1	1	1	P0-C-A-N	NA	1	1	NA	1	NA	1	NA
D907_N	con43_H	3L	18024136	18024150	1	1	1	1	P0-C-A-N	NA	1	1	1	1	1	1	1
D907_N	con43_H	X	5192845	5192853	1	1	1	1	P0-C-A-N	NA	1	1	1	1	1	1	1
D907_N	con43_H	X	13434603	13434630	1	1	1	1	P0-C-A-N	NA	1	1	1	1	1	1	1
D907_N	con43_H	X	14617758	14617776	1	1	1	1	P0-C-A-N	NA	1	1	1	1	1	1	1
D907_N	con43_H	X	20287757	20287765	1	1	1	1	P0-C-A-N	NA	1	1	1	1	1	1	1
D907_N	con43_H	X	20540612	20540646	1	1	1	1	P0-C-A-N	NA	1	1	1	1	1	1	1
D907_N	con45_Tabor	2L	13345370	13345382	1	1	1	1	P0-C-A-N	NA	1	1	1	1	1	1	1
D907_N	con46_297	2L	1341766	1341792	1	1	1	1	P0-C-A-N	NA	1	1	1	1	1	1	1
D907_N	con46_297	2L	2288395	2288433	1	1	1	1	P0-C-A-N	NA	1	1	1	1	1	1	1
D907_N	con46_297	2L	3957575	3957780	1	1	1	1	P0-C-A-N	NA	1	1	1	1	1	1	1
D907_N	con46_297	2L	9850438	9850466	1	1	1	1	P0-C-A-N	NA	1	1	1	1	1	1	1
D907_N	con46_297	2L	12554334	12554559	1	1	1	1	P0-C-A-N	NA	1	1	1	1	1	1	1
D907_N	con46_297	2L	12796410	12796437	1	1	1	1	P0-C-A-N	NA	1	1	1	1	1	1	1
D907_N	con46_297	2L	15975869	15975882	1	1	1	1	P0-C-A-N	NA	1	1	1	1	1	1	1
D907_N	con46_297	2L	17100133	17100157	1	1	1	1	P0-C-A-N	NA	1	1	1	1	1	1	1
D907_N	con46_297	2R	23682913	23682931	1	1	1	1	P0-C-A-N	NA	1	1	1	1	1	1	1
D907_N	con46_297	3L	11844198	11844383	1	1	1	1	P0-C-A-N	NA	1	1	1	1	1	1	1
D907_N	con46_297	3L	17719029	17719057	1	1	1	1	P0-C-A-N	NA	1	1	1	1	1	1	1
D907_N	con46_297	3R	17288864	17288883	1	1	1	1	P0-C-A-N	NA	1	1	1	1	1	1	1
D907_N	con46_297	3R	17421284	17421319	1	1	1	1	P0-C-A-N	NA	1	1	1	1	1	1	1
D907_N	con46_297	X	6900555	6900565	1	1	1	1	P0-C-A-N	NA	1	1	1	1	1	1	1
D907_N	con48_412	2L	4740102	4740108	1	1	1	1	P0-C-A-N	NA	1	1	1	1	1	1	1
D907_N	con48_412	2L	8964964	8964984	1	1	1	1	P0-C-A-N	NA	1	1	1	1	1	1	1
D907_N	con48_412	2L	12525541	12525568	1	1	1	1	P0-C-A-N	NA	1	1	1	1	1	1	1
D907_N	con48_412	2R	13971583	13971604	1	1	1	1	P0-C-A-N	NA	1	1	1	1	1	1	1
D907_N	con48_412	2R	15300909	15300916	1	1	1	1	P0-C-A-N	NA	1	1	1	1	1	1	1
D907_N	con48_412	3L	3701404	3701429	1	1	1	1	P0-C-A-N	NA	1	1	1	1	1	1	1
D907_N	con48_412	3L	5493658	5493673	1	1	1	1	P0-C-A-N	NA	1	1	1	1	1	1	1
D907_N	con48_412	3L	13067318	13067329	1	1	1	1	P0-C-A-N	NA	1	1	1	1	1	1	1
D907_N	con48_412	3L	13142222	13142358	1	1	1	1	P0-C-A-N	NA	1	1	1	1	1	1	1
D907_N	con48_412	X	7746964	7746985	1	1	1	1	P0-C-A-N	NA	1	1	1	1	1	1	1
D907_N	con48_412	X	14976331	14976361	1	1	1	1	P0-C-A-N	NA	1	1	1	1	1	1	1
D907_N	con48_roo	2L	634687	634692	1	1	1	1	P0-C-A-N	NA	1	1	1	1	1	1	1
D907_N	con48_roo	2L	2522365	2522384	1	1	1	1	P0-C-A-N	NA	1	1	1	1	1	1	1
D907_N	con48_roo	2L	2631423	2631465	1	1	1	1	P0-C-A-N	NA	1	1	1	1	1	1	1
D907_N	con48_roo	2L	2691955	2691978	1	1	1	1	P0-C-A-N	NA	1	1	1	1	1	1	1
D907_N	con48_roo	2L	4154597	4154813	1	1	1	1	P0-C-A-N	NA	1	1	1	1	1	1	1
D907_N	con48_roo	2L	4714523	4714546	1	1	1	1	P0-C-A-N	NA	1	1	1	1	1	1	1
D907_N	con48_roo	2L	7990586	7990599	1	1	1	1	P0-C-A-N	NA	1	1	1	1	1	1	1
D907_N	con48_roo	2L	10566524	10566547	1	1	1	1	P0-C-A-N	NA	1	1	1	1	1	1	1
D907_N	con48_roo	2L	17121431	17121458	1	1	1	1	P0-C-A-N	NA	1	1	1	1	1	1	1
D907_N	con48_roo	2L	17818822	17818838	1	1	1	1	P0-C-A-N	NA	1	1	1	1	1	1	1
D907_N	con48_roo	2R	6517193	6517209	1	1	1	1	P0-C-A-N	NA	1	1	1	1	1	1	1
D907_N	con48_roo	2R	7942700	7942720	1	1	1	1	P0-C-A-N	NA	1	1	1	1	1	1	1
D907_N	con48_roo	2R	9560663	9560672	1	1	1	1	P0-C-A-N	NA	1	1	1	1	1	1	1
D907_N	con48_roo	2R	9950743	9950754	1	1	1	1	P0-C-A-N	NA	1	1	1	1	1	1	1
D907_N	con48_roo	2R	10012771	10012784	1	1	1	1	P0-C-A-N	NA	1	1	1	1	1	1	1
D907_N	con48_roo	2R	13544972	13544998	1	1	1	1	P0-C-A-N	NA	1	1	1	1	1	1	1
D907_N	con48_roo	2R	18472573	18472597	1	1	1	1	P0-C-A-N	NA	1	1	1	1	1	1	1
D907_N	con48_roo	2R	21437773	21437788	1	1	1	1	P0-C-A-N	NA	1	1	1	1	1	1	1
D907_N	con48_roo	2R	24459451	24459473	1	1	1	1	P0-C-A-N	NA	1	1	1	1	1	1	1
D907_N	con48_roo	3L	825433	825579	1	1	1	1	P0-C-A-N	NA	1	1	1	1	1	1	1
D907_N	con48_roo	3L	3751930	3751941	1	1	1	1	P0-C-A-N	NA	1	1	1	1	1	1	1
D907_N	con48_roo	3L	5221183	5221203	1	1	1	1	P0-C-A-N	NA	1	1	1	1	1	1	1
D907_N	con48_roo	3L	5885680	5885698	1	1	1	1	P0-C-A-N	NA	1	1	1	1	1	1	1
D907_N	con48_roo	3L	6592477	6592484	1	1	1	1	P0-C-A-N	NA	1	1	1	1	1	1	1
D907_N	con48_roo	3L	6657721	6657918	1	1	1	1	P0-C-A-N	NA	1	1	1	1	1	1	1
D907_N	con48_roo	3L	8200091	8200124	1	1	1	1	P0-C-A-N	NA	1	1	1	1	1	1	1
D907_N	con48_roo	3L	8876262	8876283	1	1	1	1	P0-C-A-N	NA	1	1	1	1	1	1	1
D907_N	con48_roo	3L	12199045	12199051	1	1	1	1	P0-C-A-N	NA	1	1	1	1	1	1	1
D907_N	con48_roo	3L	16888609	16888625	1	1	1	1	P0-C-A-N	NA	1	1	1	1	1	1	1
D907_N	con48_roo	3L	17132322	17132340	1	1	1	1	P0-C-A-N	NA	1	1	1	1	1	1	1
D907_N	con48_roo	3L	18888433	18888463	1	1	1	1	P0-C-A-N	NA	1	1	1	1	1	1	1
D907_N	con48_roo	X	7114380	7114390	1	1	1	1	P0-C-A-N	NA	1	1	1	1	1	1	1
D907_N	con48_roo	X	7118537	7118558	1	1	1	1	P0-C-A-N	NA	1	1	1	1	1	1	1
D907_N	con48_roo	X	10132698	10132716	1	1	1	1	P0-C-A-N	NA	1	1	1	1	1	1	1
D907_N	con48_roo	X	10487833	10487854	1	1	1	1	P0-C-A-N	NA	1	1	1	1	1	1	1
D907_N	con48_roo	X	11061839	11061871	1	1	1	1	P0-C-A-N	NA	1	1	1	1	1	1	1
D907_N	con48_roo	X	11375016	11375029	1	1	1	1	P0-C-A-N	NA	1	1	1	1	1	1	1
D907_N	con48_roo	X	15412488	15412512	1	1	1	1	P0-C-A-N	NA	1	1	1	1	1	1	1
D907_N	con48_roo	X	15705741	15705753	1	1	1	1	P0-C-A-N	NA	1	1	1	1	1	1	1
D907_N	con48_roo	X	16988808	16988814	1	1	1	1	P0-C-A-N	NA	1	1	1	1	1	1	1
D907_N	con48_roo	X	19075664	19075678	1	1	1	1	P0-C-A-N	NA	1	1	1	1	1	1	1
D907_N	con48_roo	X	19829772	19829778	1	1	1	1	P0-C-A-N	NA	1	1	1	1	1	1	1
D907_N	con8_G2	2L	3265152	3265169	1	1	1	1	P0-C-A-N	NA	1	1	1	1	1	1	1
D907_N	con15_pogo	2R	18352087	18352400	0.219512	NA	0.349398	0.333333	P0-A-N	NA	0.135	1	NA	0.216	NA	0.216	NA
D907_N	con15_pogo	2R	18336263	18336420	0.495495	NA	0.378641	0.505155	P0-A-N	NA	0.242	0.277	NA	0.277	NA	1	NA
D907_N	con33_P-element	3R	8090561	8090764	0.666667	NA	0.555556	0.294118	P0-A-N	NA	0.356	0.462	NA	1	NA	0.462	NA
D907_N	con20_Burdock	X	19720725	19720769	1	NA	1	1	P0-A-N	NA	1	1	NA	1	NA	1	NA
D907_N	con20_jockey	2R	11582060	11582083	1	NA	1	1	P0-A-N	NA	1	1	1	1	1	1	1
D907_N	con22_S-element	3R	9347478	9347783	0.044335	0.0582011	0.231788	NA	P0-C-A	NA	1.65e-07	NA	2.56e-05	2.51e-06	NA	NA	0.64
D907_N	con14_F-element	3R	6859539	6859552	0.669291	0.507937	0.4	NA	P0-C-A	0.516281	0.00274	0.0366	0.271	0.00277	0.332	0.332	0.105
D907_N	con17_invader3	3R	9192458	9192662	0.0612245	0.0482759	0.148148	NA	P0-C-A	NA	0.0194	NA	0.0348	0.0663	NA	NA	0.793
D907_N	con43_H	2R	10049191	10049204	1	1	1	NA	P0-C-A	NA	1	1	1	1	1	1	1
D907_N	con22_S-element	2R	18690810	18691018	0.161905	0.191489	NA	1	P0-C-N	27.3293	3.27e-26	NA	NA	NA	1.62e-19	9.87e-22	0.688
D907_N	con26_BS	2R	18807665	18807882	1	0.262295	NA	1	P0-C-N	1	4.03e-15	NA	NA	NA	2.44e-09	1	9.51e-10
D907_N	con48_roo	3R	14335587	14335603	0.333333	0.60396	NA	0.118812	P0-C-N	-1.79268	1.39e-13	NA	NA	NA	1.34e-13	8.19e-06	0.000385
D907_N	con41_UnFmcl001_RLX-incomp	3R	13010114	13010140	0.261364	0.533981	NA	0.0971429	P0-C-N	-1.60239	1.43e-11	NA	NA	NA	9e-12	0.000254	0.000196
D907_N	con48_roo	3R	18351603	18351614	0.1875	0.0709677	NA	0.494949	P0-C-N	3.63832	1.57e-11	NA	NA	NA	1.39e-11	5.66e-05	0.00703
D907_N	con12_Doc	3R	13926204	13926216	0.370629	0.64539	NA	0.187097	P0-C-N	-1.66797	3.95e-11	NA	NA	NA	3.45e-11	0.00208	0.000346
D907_N	con25_opus	3R	19628971	19628995	0.221477	0.15625	NA	0.68	P0-C-N	8.02965	6.12e-11	NA	NA	NA	7.32e-10	5.24e-08	0.242
D907_N	con48_roo	3R	27184555	27184574	0.0666667	0.327586	NA	0.328859	P0-C-N	0.0048789	2.31e-10	NA	NA	NA	1	1.36e-08	6.92e-08
D907_N	con25_opus	3R	18001384	18001403	0.304878	0.139535	NA	0.533835	P0-C-N	2.38474	7.4e-10	NA	NA	NA	3.63e-10	0.00129	0.00129
D907_N	con43_H	3R	13328688	13328705	0.376812	0.523077	NA	0.142857	P0-C-N	-2.59953	1.35e-09	NA	NA	NA	1.78e-09	5.26e-05	0.0549
D907_N	con20_jockey	3R	12321492	12321513	0.422222	0.692308	NA	0.243243	P0-C-N	-1.66267	5.96e-09	NA	NA	NA	4.23e-09	0.00591	0.00129
D907_N	con20_jockey	3R	14173870	14173883	0.319797	0.46875	NA	0.129944	P0-C-N	-2.27458	2.93e-08	NA	NA	NA	2.92e-08	0.000159	0.0293
D907_N	con13_UnFmcl013_RLX-incomp	3R	15593425	15593460	0.148387	0.00980392	NA	0.038674	P0-C-N	0.208323	4.75e-07	NA	NA	NA	0.0891	0.0017	1.39e-06
D907_N	con20_HMS-Beagle	3R	14569991	14570021	0.371795	0.48	NA	0.15493	P0-C-N	-3.0042	3.39e-06	NA	NA	NA	7.08e-06	0.00029	0.169
D907_N	con20_jockey	3R	13379349	13379364	0.301775	0.52381	NA	0.222857	P0-C-N	-1.35543	4.9e-06	NA	NA	NA	5.76e-06	0.168	0.0016
D907_N	con33_P-element	3R	13976251	13976266	0.223881	0.348315	NA	0.0853659	P0-C-N	-2.11316	1.12e-05	NA	NA	NA	1.21e-05	0.00405	0.0871
D907_N	con15_Rt1b	3R	9931232	9931247	0.36036	0.6	NA	0.337349	P0-C-N	-1.09602	0.000164	NA	NA	NA	0.000634	0.709	0.000634
D907_N	con48_412	3R	14154828	14154869	0.211679	0.428571	NA	0.164179	P0-C-N	-1.219	0.00032	NA	NA	NA	0.000522	0.399	0.00429
D907_N	con48_roo	3R	13085982	13086007	0.348148	0.471074	NA	0.213793	P0-C-N	-2.09297	0.000602	NA	NA	NA	0.000486	0.052	0.0993
D907_N	con22_Stalker2	3R	12047452	12047466	0.352941	0.632653	NA	0.5	P0-C-N	-0.474249	0.00106	NA	NA	NA	0.128	0.0682	0.000951
D907_N	con26_BS	3R	12131023	12131025	0.805556	0.518519	NA	0.898305	P0-C-N	1.32313	0.00146	NA	NA	NA	0.00222	0.337	0.0158
D907_N	con41_UnFmcl001_RLX-incomp	3R	9927680	9927723	0.254438	0.392	NA	0.194969	P0-C-N	-1.43231	0.00482	NA	NA	NA	0.00498	0.305	0.0466
D907_N	con48_roo	3R	20370548	20370584	0.0722892	0.187215	NA	0.158537	P0-C-N	-0.249535	0.00658	NA	NA	NA	0.556	0.0422	0.00669
D907_N	con15_pogo	X	10973739	10974047	0.580952	0.367742	NA	0.365517	P0-C-N	-0.0104357	0.0073	NA	NA	NA	1	0.0097	0.0097
D907_N	con48_412	3R	11261095	11261120	0.186667	0.338028	NA	0.338235	P0-C-N	0.00136759	0.0118	NA	NA	NA	1	0.0164	0.0164
D907_N	con48_roo	3R	11006326	11006358	0.193182	0.279279	NA	0.362832	P0-C-N	0.970452	0.0179	NA	NA	NA	0.255	0.0181	0.229
D907_N	con25_1360	3R	13544049	13544239	0.0804598	0.235294	NA	0.0989011	P0-C-N	-0.880896	0.0237	NA	NA	NA	0.0549	0.787	0.0477
D907_N	con42_mdg1	3R	11173292	11173303	0.287129	0.5	NA	0.333333	P0-C-N	-0.782948	0.0262	NA	NA	NA	0.0716	0.618	0.0438
D907_N	con26_Tirant	3R	11948982	11949052	0.191011	0.261538	NA	0.333333	P0-C-N	1.01798	0.0387	NA	NA	NA	0.286	0.0393	0.286
D907_N	con25_1360	3R	18029227	18029439	0.00787402	0.027027	NA	0.0689655	P0-C-N	2.18966	0.0574	NA	NA	NA	0.342	0.113	0.342
D907_N	con46_297	3R	11933775	11933896	0.266667	0.431193	NA	0.310345	P0-C-N	-0.734522	0.0687	NA	NA	NA	0.217	0.625	0.107
D907_N	con26_I-element	3R	9817346	9817388	0.375	0.528302	NA	0.435484	P0-C-N	-0.605459	0.148	NA	NA	NA	0.398	0.449	0.176
D907_N	con48_roo	3R	9891414	9891427	0.303797	0.44	NA	0.327731	P0-C-N	-0.824277	0.153	NA	NA	NA	0.285	0.765	0.198
D907_N	con48_roo	3R	10746254	10746276	0.215686	0.308824	NA	0.213793	P0-C-N	-1.02032	0.168	NA	NA	NA	0.19	1	0.19
D907_N	con48_412	3R	11188856	11188882	0.319588	0.428571	NA	0.462963	P0-C-N	0.315572	0.187	NA	NA	NA	0.741	0.271	0.347
D907_N	con13_UnFmcl013_RLX-incomp	2R	20436758	20436770	0.245614	0.291339	NA	0.369565	P0-C-N	1.71079	0.233	NA	NA	NA	0.477	0.354	0.515
D907_N	con48_roo	3R	10901580	10901622	0.288136	0.382979	NA	0.409091	P0-C-N	0.275318	0.25	NA	NA	NA	0.858	0.358	0.358
D907_N	con48_roo	3R	10991705	10991715	0.3	0.378151	NA	0.404255	P0-C-N	0.33402	0.353	NA	NA	NA	0.868	0.515	0.515
D907_N	con24_Transpac	X	17784382	17784602	0.442177	0.428571	NA	0.515152	P0-C-N	6.36344	0.476	NA	NA	NA	0.573	0.573	0.884
D907_N	con19_Quasimodo	3R	11172858	11172884	0.438596	0.512605	NA	0.536842	P0-C-N	0.327487	0.479	NA	NA	NA	0.865	0.638	0.638
D907_N	con15_pogo	2L	11891042	11891353	0.275862	0.305785	NA	0.232	P0-C-N	-2.46583	0.518	NA	NA	NA	0.745	0.745	0.745
D907_N	con48_roo	3R	11525548	11525563	0.27044	0.247863	NA	0.209677	P0-C-N	-1.69137	0.57	NA	NA	NA	0.756	0.756	0.756
D907_N	con15_Rt1b	3R	9935731	9935751	0.411111	0.402439	NA	0.380952	P0-C-N	-2.47774	0.885	NA	NA	NA	0.897	0.897	0.897
D907_N	con20_jockey	3R	9977340	9977366	0.403974	0.417722	NA	0.422535	P0-C-N	0.350087	0.969	NA	NA	NA	1	1	1
D907_N	con12_Doc	3R	9619215	9619252	0.333333	0.346667	NA	0.34715	P0-C-N	0.0362232	0.971	NA	NA	NA	1	1	1
D907_N	con48_roo	3L	18085458	18085476	NA	0.129412	1	0.169231	C-A-N	NA	4.97e-11	1.82e-08	3.24e-10	NA	0.621	NA	NA
D907_N	con20_jockey	3R	22864352	22864366	NA	0.589744	0.96875	1	C-A-N	NA	9.34e-07	1	0.000142	NA	0.000206	NA	NA
D907_N	con14_F-element	3L	10705391	10705607	NA	1	1	1	C-A-N	NA	1	1	1	1	1	1	1
D907_N	con14_F-element	3L	16546726	16546875	0.205128	NA	0.424	NA	P0-A	NA	0.00065	NA	NA	0.00065	NA	NA	NA
D907_N	con15_pogo	2R	24021429	24021738	0.469136	NA	0.536424	NA	P0-A	NA	0.337	NA	NA	0.337	NA	NA	NA
D907_N	con15_pogo	3R	13975543	13975855	0.316239	NA	NA	0.342282	P0-N	NA	0.762	NA	NA	NA	NA	0.762	NA
D907_N	con41_UnFmcl001_RLX-incomp	2R	10101569	10101592	0.0493827	NA	NA	0.0573248	P0-N	NA	0.803	NA	NA	NA	NA	0.803	NA
D907_N	BDGP_R2-element	3R	15434337	15434514	0.00436681	NA	NA	0.00469484	P0-N	NA	1	NA	NA	NA	NA	1	NA
D907_N	con16_blood	3L	5332944	5333121	0.00487805	NA	NA	0.00444444	P0-N	NA	1	NA	NA	NA	NA	1	NA
D907_N	con24_X-element	3R	16799828	16800018	0.00699301	NA	NA	0.00934579	P0-N	NA	1	NA	NA	NA	NA	1	NA
D907_N	con11_hopper	3R	20409643	20409686	0.704348	0.536	NA	NA	P0-C	2.7562	8.16e-15	1	6.81e-09	4.7e-05	4.12e-10	5.46e-06	0.0515
D907_N	con22_S-element	3R	14046327	14046564	0.390071	0.225225	NA	NA	P0-C	NA	0.0178	NA	NA	NA	NA	NA	0.0178
D907_N	con15_pogo	2R	19414661	19414970	NA	0.244444	0.535714	NA	C-A	NA	1.75e-05	NA	1.75e-05	NA	NA	NA	NA
D907_N	con14_Juan	3L	16146601	16146828	NA	0.0502793	0.203125	NA	C-A	NA	0.000115	NA	0.000115	NA	NA	NA	NA
D907_N	con14_Juan	3R	17401459	17401770	NA	0.102941	0.145833	NA	C-A	NA	0.392	NA	0.392	NA	NA	NA	NA
D907_N	con26_I-element	3R	19514527	19514557	NA	0.472868	NA	1	C-N	11.4306	1.78e-22	1	3.72e-11	6.18e-13	1.2e-10	1.2e-12	0.68
D907_N	con48_412	3R	13878008	13878193	NA	0.563636	NA	0.148387	C-N	NA	8.26e-10	NA	NA	NA	8.26e-10	NA	NA
D907_N	con41_UnFmcl001_RLX-incomp	3L	11553450	11553454	NA	0.0458716	NA	0.271676	C-N	NA	4.77e-09	NA	NA	NA	4.77e-09	NA	NA
D907_N	con15_pogo	3L	10551425	10551730	NA	0.358025	NA	1	C-N	NA	2.55e-05	NA	NA	NA	2.55e-05	NA	NA
D907_N	con41_UnFmcl001_RLX-incomp	3L	14756742	14756746	NA	0.121951	NA	0.0422535	C-N	NA	0.0125	NA	NA	NA	0.0125	NA	NA
D907_N	con15_pogo	3R	7100913	7101225	NA	0.466667	NA	0.350318	C-N	NA	0.0808	NA	NA	NA	0.0808	NA	NA
D907_N	con41_UnFmcl001_RLX-incomp	X	16279328	16279332	NA	0.175824	NA	0.142857	C-N	NA	0.457	NA	NA	NA	0.457	NA	NA
D907_N	con41_UnFmcl001_RLX-incomp	3L	12706072	12706076	NA	0.0538922	NA	0.0366492	C-N	NA	0.602	NA	NA	NA	0.602	NA	NA
D907_N	BDGP_Q-element;con5_Cr1a	3R	21728308	21728489	NA	0.0108696	NA	0.00492611	C-N	NA	0.606	NA	NA	NA	0.606	NA	NA
D907_N	con41_UnFmcl001_RLX-incomp	X	17286170	17286175	NA	0.237288	NA	0.212598	C-N	NA	0.736	NA	NA	NA	0.736	NA	NA
D907_N	con16_blood	3L	14613038	14613215	NA	0.00671141	NA	0.0052356	C-N	NA	1	NA	NA	NA	1	NA	NA
D907_N	con41_UnFmcl001_RLX-incomp	3L	12179779	12179806	NA	0.0505051	NA	0.0505051	C-N	NA	1	NA	NA	NA	1	NA	NA
D907_N	BDGP_Circe	2R	11115140	11115317	NA	NA	NA	0.00421941	de_novo	NA	NA	NA	NA	NA	NA	NA	NA
D907_N	BDGP_Circe	3R	7905211	7905388	NA	NA	NA	0.00502513	de_novo	NA	NA	NA	NA	NA	NA	NA	NA
D907_N	BDGP_Circe	3R	9892127	9892304	NA	NA	NA	0.00578035	de_novo	NA	NA	NA	NA	NA	NA	NA	NA
D907_N	BDGP_Circe	3R	31317289	31317466	NA	NA	NA	0.00502513	de_novo	NA	NA	NA	NA	NA	NA	NA	NA
D907_N	BDGP_Circe	X	6822567	6822744	NA	NA	NA	0.00469484	de_novo	NA	NA	NA	NA	NA	NA	NA	NA
D907_N	BDGP_G5A	3R	7326514	7326691	NA	NA	NA	0.00540541	de_novo	NA	NA	NA	NA	NA	NA	NA	NA
D907_N	BDGP_Q-element	2R	7192933	7193110	NA	NA	NA	0.00414938	de_novo	NA	NA	NA	NA	NA	NA	NA	NA
D907_N	BDGP_R1A1-element	2R	24773477	24773505	NA	NA	NA	0.00806452	de_novo	NA	NA	NA	NA	NA	NA	NA	NA
D907_N	BDGP_R1A1-element	3L	18313711	18313963	NA	NA	NA	0.00649351	de_novo	NA	NA	NA	NA	NA	NA	NA	NA
D907_N	BDGP_R1A1-element	X	12086392	12086515	NA	NA	NA	0.0138889	de_novo	NA	NA	NA	NA	NA	NA	NA	NA
D907_N	BDGP_R2-element	2L	18310459	18310636	NA	NA	NA	0.00558659	de_novo	NA	NA	NA	NA	NA	NA	NA	NA
D907_N	BDGP_R2-element	2R	11472143	11472320	NA	NA	NA	0.00401606	de_novo	NA	NA	NA	NA	NA	NA	NA	NA
D907_N	BDGP_R2-element	2R	18146117	18146294	NA	NA	NA	0.00740741	de_novo	NA	NA	NA	NA	NA	NA	NA	NA
D907_N	BDGP_aurora	3R	8068496	8068673	NA	NA	NA	0.00436681	de_novo	NA	NA	NA	NA	NA	NA	NA	NA
D907_N	BDGP_aurora	X	10000758	10000935	NA	NA	NA	0.00425532	de_novo	NA	NA	NA	NA	NA	NA	NA	NA
D907_N	BDGP_baggins	2L	2233717	2233894	NA	NA	NA	0.00502513	de_novo	NA	NA	NA	NA	NA	NA	NA	NA
D907_N	BDGP_baggins	2L	18189348	18189525	NA	NA	NA	0.00473934	de_novo	NA	NA	NA	NA	NA	NA	NA	NA
D907_N	BDGP_baggins	2R	16202787	16202964	NA	NA	NA	0.0044843	de_novo	NA	NA	NA	NA	NA	NA	NA	NA
D907_N	BDGP_baggins	3R	9194055	9194232	NA	NA	NA	0.00662252	de_novo	NA	NA	NA	NA	NA	NA	NA	NA
D907_N	BDGP_baggins	3R	22962402	22962579	NA	NA	NA	0.00578035	de_novo	NA	NA	NA	NA	NA	NA	NA	NA
D907_N	BDGP_baggins	X	5738412	5738589	NA	NA	NA	0.004329	de_novo	NA	NA	NA	NA	NA	NA	NA	NA
D907_N	BDGP_baggins	X	8726879	8727056	NA	NA	NA	0.0123457	de_novo	NA	NA	NA	NA	NA	NA	NA	NA
D907_N	BDGP_baggins	X	16098390	16098567	NA	NA	NA	0.0044843	de_novo	NA	NA	NA	NA	NA	NA	NA	NA
D907_N	BDGP_gypsy11	3L	6434086	6434263	NA	NA	NA	0.00621118	de_novo	NA	NA	NA	NA	NA	NA	NA	NA
D907_N	DNAREP1_INE-1	2R	13026292	13026469	NA	NA	NA	0.00440529	de_novo	NA	NA	NA	NA	NA	NA	NA	NA
D907_N	UnFUnClUnAlig_DHX-incomp_COR	2L	10318929	10319106	NA	NA	NA	0.00534759	de_novo	NA	NA	NA	NA	NA	NA	NA	NA
D907_N	UnFUnClUnAlig_DHX-incomp_COR	3L	11038160	11038337	NA	NA	NA	0.00395257	de_novo	NA	NA	NA	NA	NA	NA	NA	NA
D907_N	UnFUnClUnAlig_RIX-incomp_JUT_2	3L	17830457	17830634	NA	NA	NA	0.00330033	de_novo	NA	NA	NA	NA	NA	NA	NA	NA
D907_N	UnFUnClUnAlig_RLX-incomp_COR_2	2R	8963304	8963481	NA	NA	NA	0.00787402	de_novo	NA	NA	NA	NA	NA	NA	NA	NA
D907_N	UnFUnClUnAlig_RLX-incomp_RAL177	3R	14888458	14888635	NA	NA	NA	0.003861	de_novo	NA	NA	NA	NA	NA	NA	NA	NA
D907_N	UnFUnClUnAlig_RLX-incomp_SLO	2L	7044755	7044932	NA	NA	NA	0.00680272	de_novo	NA	NA	NA	NA	NA	NA	NA	NA
D907_N	UnFmclCluster039_RLX-incomp_COR	3L	18211285	18211462	NA	NA	NA	0.00401606	de_novo	NA	NA	NA	NA	NA	NA	NA	NA
D907_N	con10_Idefix	3R	9183239	9183416	NA	NA	NA	0.00497512	de_novo	NA	NA	NA	NA	NA	NA	NA	NA
D907_N	con10_UnFmcl019_RLX-incomp	X	8119941	8120118	NA	NA	NA	0.00348432	de_novo	NA	NA	NA	NA	NA	NA	NA	NA
D907_N	con11_hopper	3L	11649041	11649218	NA	NA	NA	0.00934579	de_novo	NA	NA	NA	NA	NA	NA	NA	NA
D907_N	con11_hopper	3R	14560093	14560270	NA	NA	NA	0.0106383	de_novo	NA	NA	NA	NA	NA	NA	NA	NA
D907_N	con12_Doc	2L	5898295	5898472	NA	NA	NA	0.00819672	de_novo	NA	NA	NA	NA	NA	NA	NA	NA
D907_N	con12_Doc	2R	6148075	6148318	NA	NA	NA	0.00961538	de_novo	NA	NA	NA	NA	NA	NA	NA	NA
D907_N	con12_Doc	2R	14220857	14221034	NA	NA	NA	0.00961538	de_novo	NA	NA	NA	NA	NA	NA	NA	NA
D907_N	con12_Doc	3L	3596018	3596195	NA	NA	NA	0.00444444	de_novo	NA	NA	NA	NA	NA	NA	NA	NA
D907_N	con12_Doc	3R	30538022	30538109	NA	NA	NA	0.0102041	de_novo	NA	NA	NA	NA	NA	NA	NA	NA
D907_N	con12_TAHRE	2R	7072643	7072820	NA	NA	NA	0.00383142	de_novo	NA	NA	NA	NA	NA	NA	NA	NA
D907_N	con13_HB	X	13300703	13300880	NA	NA	NA	0.00483092	de_novo	NA	NA	NA	NA	NA	NA	NA	NA
D907_N	con13_Tc1	2R	15528712	15528889	NA	NA	NA	0.00540541	de_novo	NA	NA	NA	NA	NA	NA	NA	NA
D907_N	con13_Tc1	X	14890543	14890720	NA	NA	NA	0.00584795	de_novo	NA	NA	NA	NA	NA	NA	NA	NA
D907_N	con13_UnFmcl013_RLX-incomp	2L	2441279	2441456	NA	NA	NA	0.00338983	de_novo	NA	NA	NA	NA	NA	NA	NA	NA
D907_N	con13_UnFmcl013_RLX-incomp	2L	17430703	17430880	NA	NA	NA	0.00645161	de_novo	NA	NA	NA	NA	NA	NA	NA	NA
D907_N	con13_UnFmcl013_RLX-incomp	2R	9443488	9443665	NA	NA	NA	0.00546448	de_novo	NA	NA	NA	NA	NA	NA	NA	NA
D907_N	con13_UnFmcl013_RLX-incomp	2R	20814824	20815001	NA	NA	NA	0.00662252	de_novo	NA	NA	NA	NA	NA	NA	NA	NA
D907_N	con13_UnFmcl013_RLX-incomp	3L	5330068	5330245	NA	NA	NA	0.00411523	de_novo	NA	NA	NA	NA	NA	NA	NA	NA
D907_N	con13_UnFmcl013_RLX-incomp	3L	6073926	6074103	NA	NA	NA	0.00369004	de_novo	NA	NA	NA	NA	NA	NA	NA	NA
D907_N	con13_UnFmcl013_RLX-incomp	3L	18038491	18038668	NA	NA	NA	0.00564972	de_novo	NA	NA	NA	NA	NA	NA	NA	NA
D907_N	con13_UnFmcl013_RLX-incomp	3R	26995207	26995384	NA	NA	NA	0.00497512	de_novo	NA	NA	NA	NA	NA	NA	NA	NA
D907_N	con13_UnFmcl013_RLX-incomp	X	2086922	2087099	NA	NA	NA	0.00512821	de_novo	NA	NA	NA	NA	NA	NA	NA	NA
D907_N	con13_UnFmcl013_RLX-incomp	X	4749902	4750079	NA	NA	NA	0.00529101	de_novo	NA	NA	NA	NA	NA	NA	NA	NA
D907_N	con13_UnFmcl013_RLX-incomp	X	7390340	7390517	NA	NA	NA	0.00621118	de_novo	NA	NA	NA	NA	NA	NA	NA	NA
D907_N	con14_F-element	2L	4282549	4282726	NA	NA	NA	0.00460829	de_novo	NA	NA	NA	NA	NA	NA	NA	NA
D907_N	con14_F-element	2L	5730163	5730340	NA	NA	NA	0.00546448	de_novo	NA	NA	NA	NA	NA	NA	NA	NA
D907_N	con14_F-element	2L	12305302	12305479	NA	NA	NA	0.00408163	de_novo	NA	NA	NA	NA	NA	NA	NA	NA
D907_N	con14_F-element	2L	12364727	12364904	NA	NA	NA	0.00518135	de_novo	NA	NA	NA	NA	NA	NA	NA	NA
D907_N	con14_F-element	2L	17373544	17373721	NA	NA	NA	0.00436681	de_novo	NA	NA	NA	NA	NA	NA	NA	NA
D907_N	con14_F-element	2R	12900062	12900239	NA	NA	NA	0.00497512	de_novo	NA	NA	NA	NA	NA	NA	NA	NA
D907_N	con14_F-element	3L	8958386	8958563	NA	NA	NA	0.00473934	de_novo	NA	NA	NA	NA	NA	NA	NA	NA
D907_N	con14_F-element	3L	14746261	14746438	NA	NA	NA	0.00429185	de_novo	NA	NA	NA	NA	NA	NA	NA	NA
D907_N	con14_F-element	3L	15235158	15235335	NA	NA	NA	0.00636943	de_novo	NA	NA	NA	NA	NA	NA	NA	NA
D907_N	con14_F-element	3R	9421171	9421348	NA	NA	NA	0.00425532	de_novo	NA	NA	NA	NA	NA	NA	NA	NA
D907_N	con14_F-element	3R	12836581	12836758	NA	NA	NA	0.0041841	de_novo	NA	NA	NA	NA	NA	NA	NA	NA
D907_N	con14_F-element	3R	15588080	15588257	NA	NA	NA	0.00425532	de_novo	NA	NA	NA	NA	NA	NA	NA	NA
D907_N	con14_F-element	3R	16244304	16244481	NA	NA	NA	0.00444444	de_novo	NA	NA	NA	NA	NA	NA	NA	NA
D907_N	con14_F-element	3R	21734833	21735010	NA	NA	NA	0.00507614	de_novo	NA	NA	NA	NA	NA	NA	NA	NA
D907_N	con14_F-element	X	2839367	2839544	NA	NA	NA	0.00578035	de_novo	NA	NA	NA	NA	NA	NA	NA	NA
D907_N	con14_F-element	X	6873086	6873263	NA	NA	NA	0.00558659	de_novo	NA	NA	NA	NA	NA	NA	NA	NA
D907_N	con14_F-element	X	8579195	8579372	NA	NA	NA	0.00558659	de_novo	NA	NA	NA	NA	NA	NA	NA	NA
D907_N	con14_F-element	X	13641580	13641757	NA	NA	NA	0.00492611	de_novo	NA	NA	NA	NA	NA	NA	NA	NA
D907_N	con14_F-element	X	15491906	15492083	NA	NA	NA	0.00598802	de_novo	NA	NA	NA	NA	NA	NA	NA	NA
D907_N	con15_Rt1b	2L	2804364	2804541	NA	NA	NA	0.00452489	de_novo	NA	NA	NA	NA	NA	NA	NA	NA
D907_N	con15_Rt1b	3L	15780369	15780546	NA	NA	NA	0.00483092	de_novo	NA	NA	NA	NA	NA	NA	NA	NA
D907_N	con15_Rt1b	3L	16496383	16496560	NA	NA	NA	0.0075188	de_novo	NA	NA	NA	NA	NA	NA	NA	NA
D907_N	con15_Rt1b	3R	21997093	21997270	NA	NA	NA	0.00518135	de_novo	NA	NA	NA	NA	NA	NA	NA	NA
D907_N	con15_Rt1b	X	7952913	7953090	NA	NA	NA	0.0075188	de_novo	NA	NA	NA	NA	NA	NA	NA	NA
D907_N	con15_flea	2L	14131965	14132142	NA	NA	NA	0.0075188	de_novo	NA	NA	NA	NA	NA	NA	NA	NA
D907_N	con17_Max-element	3L	1845166	1845343	NA	NA	NA	0.00456621	de_novo	NA	NA	NA	NA	NA	NA	NA	NA
D907_N	con17_Max-element	3R	19681301	19681478	NA	NA	NA	0.00465116	de_novo	NA	NA	NA	NA	NA	NA	NA	NA
D907_N	con17_Max-element	3R	20005514	20005691	NA	NA	NA	0.00483092	de_novo	NA	NA	NA	NA	NA	NA	NA	NA
D907_N	con17_Max-element	3R	21929945	21930122	NA	NA	NA	0.00421941	de_novo	NA	NA	NA	NA	NA	NA	NA	NA
D907_N	con17_Max-element	X	11721930	11722107	NA	NA	NA	0.00401606	de_novo	NA	NA	NA	NA	NA	NA	NA	NA
D907_N	con17_rover	3L	9869760	9869937	NA	NA	NA	0.00469484	de_novo	NA	NA	NA	NA	NA	NA	NA	NA
D907_N	con17_rover	3R	16465313	16465490	NA	NA	NA	0.004329	de_novo	NA	NA	NA	NA	NA	NA	NA	NA
D907_N	con19_Quasimodo	2R	23409605	23409782	NA	NA	NA	0.00529101	de_novo	NA	NA	NA	NA	NA	NA	NA	NA
D907_N	con19_Quasimodo	3R	25977530	25977707	NA	NA	NA	0.00456621	de_novo	NA	NA	NA	NA	NA	NA	NA	NA
D907_N	con20_jockey	2R	8964508	8964685	NA	NA	NA	0.00421941	de_novo	NA	NA	NA	NA	NA	NA	NA	NA
D907_N	con20_jockey	2R	15320237	15320414	NA	NA	NA	0.00392157	de_novo	NA	NA	NA	NA	NA	NA	NA	NA
D907_N	con20_jockey	3L	3736221	3736398	NA	NA	NA	0.0052356	de_novo	NA	NA	NA	NA	NA	NA	NA	NA
D907_N	con20_jockey	3R	21959022	21959199	NA	NA	NA	0.00429185	de_novo	NA	NA	NA	NA	NA	NA	NA	NA
D907_N	con20_jockey	X	2897570	2897747	NA	NA	NA	0.00487805	de_novo	NA	NA	NA	NA	NA	NA	NA	NA
D907_N	con20_jockey	X	20928297	20928474	NA	NA	NA	0.00840336	de_novo	NA	NA	NA	NA	NA	NA	NA	NA
D907_N	con21_Ivk	3L	11167546	11167723	NA	NA	NA	0.00492611	de_novo	NA	NA	NA	NA	NA	NA	NA	NA
D907_N	con23_copia	3L	3334676	3334853	NA	NA	NA	0.00546448	de_novo	NA	NA	NA	NA	NA	NA	NA	NA
D907_N	con23_copia	3L	4899523	4899700	NA	NA	NA	0.00689655	de_novo	NA	NA	NA	NA	NA	NA	NA	NA
D907_N	con25_1360	2L	714311	714488	NA	NA	NA	0.00578035	de_novo	NA	NA	NA	NA	NA	NA	NA	NA
D907_N	con25_1360	2L	3345415	3345592	NA	NA	NA	0.00689655	de_novo	NA	NA	NA	NA	NA	NA	NA	NA
D907_N	con25_1360	2L	4436581	4436758	NA	NA	NA	0.00529101	de_novo	NA	NA	NA	NA	NA	NA	NA	NA
D907_N	con25_1360	2L	7925444	7925621	NA	NA	NA	0.00578035	de_novo	NA	NA	NA	NA	NA	NA	NA	NA
D907_N	con25_1360	2R	6693440	6693617	NA	NA	NA	0.003861	de_novo	NA	NA	NA	NA	NA	NA	NA	NA
D907_N	con25_1360	2R	23137440	23137617	NA	NA	NA	0.00564972	de_novo	NA	NA	NA	NA	NA	NA	NA	NA
D907_N	con25_1360	3L	16217006	16217183	NA	NA	NA	0.00429185	de_novo	NA	NA	NA	NA	NA	NA	NA	NA
D907_N	con25_1360	3R	17888454	17888631	NA	NA	NA	0.00452489	de_novo	NA	NA	NA	NA	NA	NA	NA	NA
D907_N	con25_1360	3R	19131512	19131689	NA	NA	NA	0.00662252	de_novo	NA	NA	NA	NA	NA	NA	NA	NA
D907_N	con25_1360	X	3207935	3208112	NA	NA	NA	0.00502513	de_novo	NA	NA	NA	NA	NA	NA	NA	NA
D907_N	con25_1360	X	18995799	18995976	NA	NA	NA	0.00534759	de_novo	NA	NA	NA	NA	NA	NA	NA	NA
D907_N	con25_1360	X	19090792	19090969	NA	NA	NA	0.0133333	de_novo	NA	NA	NA	NA	NA	NA	NA	NA
D907_N	con25_opus	2L	6831765	6831942	NA	NA	NA	0.00401606	de_novo	NA	NA	NA	NA	NA	NA	NA	NA
D907_N	con25_opus	2R	13811454	13811631	NA	NA	NA	0.012987	de_novo	NA	NA	NA	NA	NA	NA	NA	NA
D907_N	con25_opus	3L	8165975	8166152	NA	NA	NA	0.00826446	de_novo	NA	NA	NA	NA	NA	NA	NA	NA
D907_N	con26_BS	2L	7860713	7860890	NA	NA	NA	0.00497512	de_novo	NA	NA	NA	NA	NA	NA	NA	NA
D907_N	con26_BS	2L	9229656	9229833	NA	NA	NA	0.00621118	de_novo	NA	NA	NA	NA	NA	NA	NA	NA
D907_N	con26_BS	3L	10343328	10343505	NA	NA	NA	0.00529101	de_novo	NA	NA	NA	NA	NA	NA	NA	NA
D907_N	con26_BS	3R	8627684	8627861	NA	NA	NA	0.00512821	de_novo	NA	NA	NA	NA	NA	NA	NA	NA
D907_N	con26_BS	X	4697953	4698130	NA	NA	NA	0.00473934	de_novo	NA	NA	NA	NA	NA	NA	NA	NA
D907_N	con26_BS	X	5133659	5133836	NA	NA	NA	0.00558659	de_novo	NA	NA	NA	NA	NA	NA	NA	NA
D907_N	con26_Tirant	2L	10060900	10061077	NA	NA	NA	0.00571429	de_novo	NA	NA	NA	NA	NA	NA	NA	NA
D907_N	con26_Tirant	2R	17253405	17253582	NA	NA	NA	0.00460829	de_novo	NA	NA	NA	NA	NA	NA	NA	NA
D907_N	con26_mdg3	3L	8477803	8477980	NA	NA	NA	0.00478469	de_novo	NA	NA	NA	NA	NA	NA	NA	NA
D907_N	con2_Fw2	2R	22017691	22017868	NA	NA	NA	0.00892857	de_novo	NA	NA	NA	NA	NA	NA	NA	NA
D907_N	con2_G3	2R	13770142	13770319	NA	NA	NA	0.0133333	de_novo	NA	NA	NA	NA	NA	NA	NA	NA
D907_N	con2_NOF	2L	8316152	8316329	NA	NA	NA	0.00401606	de_novo	NA	NA	NA	NA	NA	NA	NA	NA
D907_N	con2_NOF	2L	11600474	11600651	NA	NA	NA	0.00689655	de_novo	NA	NA	NA	NA	NA	NA	NA	NA
D907_N	con2_UnFUnCl003_RLX-incomp	3R	15056158	15056335	NA	NA	NA	0.00787402	de_novo	NA	NA	NA	NA	NA	NA	NA	NA
D907_N	con2_diver2	X	1507707	1507884	NA	NA	NA	0.00606061	de_novo	NA	NA	NA	NA	NA	NA	NA	NA
D907_N	con33_17-6	3L	7107917	7108094	NA	NA	NA	0.00584795	de_novo	NA	NA	NA	NA	NA	NA	NA	NA
D907_N	con33_17-6	3R	18462160	18462337	NA	NA	NA	0.00392157	de_novo	NA	NA	NA	NA	NA	NA	NA	NA
D907_N	con33_17-6	X	15661030	15661207	NA	NA	NA	0.00636943	de_novo	NA	NA	NA	NA	NA	NA	NA	NA
D907_N	con33_17-6	X	19556057	19556234	NA	NA	NA	0.0052356	de_novo	NA	NA	NA	NA	NA	NA	NA	NA
D907_N	con33_17-6	X	20036788	20036965	NA	NA	NA	1	de_novo	NA	NA	NA	NA	NA	NA	NA	NA
D907_N	con33_17-6	X	20647677	20647854	NA	NA	NA	0.00584795	de_novo	NA	NA	NA	NA	NA	NA	NA	NA
D907_N	con3_Doc3	2R	9448959	9449136	NA	NA	NA	0.00507614	de_novo	NA	NA	NA	NA	NA	NA	NA	NA
D907_N	con3_Tc1-2	3R	9488965	9489142	NA	NA	NA	0.00540541	de_novo	NA	NA	NA	NA	NA	NA	NA	NA
D907_N	con3_Tc1-2	3R	29564949	29565126	NA	NA	NA	0.00689655	de_novo	NA	NA	NA	NA	NA	NA	NA	NA
D907_N	con41_UnFmcl001_RLX-incomp	2L	2370065	2370242	NA	NA	NA	0.00645161	de_novo	NA	NA	NA	NA	NA	NA	NA	NA
D907_N	con41_UnFmcl001_RLX-incomp	2L	7984735	7984754	NA	NA	NA	0.642857	de_novo	NA	NA	NA	NA	NA	NA	NA	NA
D907_N	con41_UnFmcl001_RLX-incomp	2L	8667892	8668069	NA	NA	NA	0.00552486	de_novo	NA	NA	NA	NA	NA	NA	NA	NA
D907_N	con41_UnFmcl001_RLX-incomp	2L	12523545	12523722	NA	NA	NA	0.00578035	de_novo	NA	NA	NA	NA	NA	NA	NA	NA
D907_N	con41_UnFmcl001_RLX-incomp	2R	9348721	9348730	NA	NA	NA	0.764706	de_novo	NA	NA	NA	NA	NA	NA	NA	NA
D907_N	con41_UnFmcl001_RLX-incomp	2R	11101611	11101788	NA	NA	NA	0.00460829	de_novo	NA	NA	NA	NA	NA	NA	NA	NA
D907_N	con41_UnFmcl001_RLX-incomp	2R	13038437	13038614	NA	NA	NA	0.00680272	de_novo	NA	NA	NA	NA	NA	NA	NA	NA
D907_N	con41_UnFmcl001_RLX-incomp	2R	16159252	16159429	NA	NA	NA	0.00671141	de_novo	NA	NA	NA	NA	NA	NA	NA	NA
D907_N	con41_UnFmcl001_RLX-incomp	2R	20800142	20800319	NA	NA	NA	0.00487805	de_novo	NA	NA	NA	NA	NA	NA	NA	NA
D907_N	con41_UnFmcl001_RLX-incomp	3L	5501150	5501327	NA	NA	NA	0.00497512	de_novo	NA	NA	NA	NA	NA	NA	NA	NA
D907_N	con41_UnFmcl001_RLX-incomp	3L	17975095	17975272	NA	NA	NA	0.00662252	de_novo	NA	NA	NA	NA	NA	NA	NA	NA
D907_N	con41_UnFmcl001_RLX-incomp	3L	18121758	18121935	NA	NA	NA	0.00518135	de_novo	NA	NA	NA	NA	NA	NA	NA	NA
D907_N	con41_UnFmcl001_RLX-incomp	3R	8614812	8614989	NA	NA	NA	0.00719424	de_novo	NA	NA	NA	NA	NA	NA	NA	NA
D907_N	con41_UnFmcl001_RLX-incomp	3R	9258768	9258945	NA	NA	NA	0.00813008	de_novo	NA	NA	NA	NA	NA	NA	NA	NA
D907_N	con41_UnFmcl001_RLX-incomp	3R	17396876	17397053	NA	NA	NA	0.008	de_novo	NA	NA	NA	NA	NA	NA	NA	NA
D907_N	con41_UnFmcl001_RLX-incomp	X	1693519	1693696	NA	NA	NA	0.00558659	de_novo	NA	NA	NA	NA	NA	NA	NA	NA
D907_N	con41_UnFmcl001_RLX-incomp	X	1860726	1860903	NA	NA	NA	0.00380228	de_novo	NA	NA	NA	NA	NA	NA	NA	NA
D907_N	con41_UnFmcl001_RLX-incomp	X	8262206	8262383	NA	NA	NA	0.00469484	de_novo	NA	NA	NA	NA	NA	NA	NA	NA
D907_N	con41_UnFmcl001_RLX-incomp	X	16621158	16621335	NA	NA	NA	0.00613497	de_novo	NA	NA	NA	NA	NA	NA	NA	NA
D907_N	con41_UnFmcl001_RLX-incomp	X	16711299	16711476	NA	NA	NA	0.00558659	de_novo	NA	NA	NA	NA	NA	NA	NA	NA
D907_N	con41_UnFmcl001_RLX-incomp	X	17578849	17579026	NA	NA	NA	0.00613497	de_novo	NA	NA	NA	NA	NA	NA	NA	NA
D907_N	con46_297	2L	3125679	3125856	NA	NA	NA	0.00465116	de_novo	NA	NA	NA	NA	NA	NA	NA	NA
D907_N	con46_297	2R	17555444	17555621	NA	NA	NA	0.00398406	de_novo	NA	NA	NA	NA	NA	NA	NA	NA
D907_N	con46_297	3R	12377351	12377528	NA	NA	NA	0.00440529	de_novo	NA	NA	NA	NA	NA	NA	NA	NA
D907_N	con46_297	3R	22429618	22429795	NA	NA	NA	0.00492611	de_novo	NA	NA	NA	NA	NA	NA	NA	NA
D907_N	con48_412	2R	11089226	11089403	NA	NA	NA	0.00502513	de_novo	NA	NA	NA	NA	NA	NA	NA	NA
D907_N	con48_412	2R	14841007	14841184	NA	NA	NA	0.00429185	de_novo	NA	NA	NA	NA	NA	NA	NA	NA
D907_N	con48_412	3L	6983649	6983826	NA	NA	NA	0.00492611	de_novo	NA	NA	NA	NA	NA	NA	NA	NA
D907_N	con48_roo	2L	7440498	7440503	NA	NA	NA	0.910448	de_novo	NA	NA	NA	NA	NA	NA	NA	NA
D907_N	con48_roo	2L	15969446	15969623	NA	NA	NA	0.00653595	de_novo	NA	NA	NA	NA	NA	NA	NA	NA
D907_N	con48_roo	2L	18393013	18393190	NA	NA	NA	0.00719424	de_novo	NA	NA	NA	NA	NA	NA	NA	NA
D907_N	con48_roo	2R	13000707	13000713	NA	NA	NA	0.543478	de_novo	NA	NA	NA	NA	NA	NA	NA	NA
D907_N	con48_roo	3L	6861245	6861454	NA	NA	NA	0.00970874	de_novo	NA	NA	NA	NA	NA	NA	NA	NA
D907_N	con48_roo	3L	8748814	8748991	NA	NA	NA	0.00408163	de_novo	NA	NA	NA	NA	NA	NA	NA	NA
D907_N	con48_roo	3L	12707879	12708056	NA	NA	NA	0.00492611	de_novo	NA	NA	NA	NA	NA	NA	NA	NA
D907_N	con48_roo	3L	12756819	12756847	NA	NA	NA	0.00925926	de_novo	NA	NA	NA	NA	NA	NA	NA	NA
D907_N	con48_roo	3R	15785072	15785249	NA	NA	NA	0.00497512	de_novo	NA	NA	NA	NA	NA	NA	NA	NA
D907_N	con48_roo	3R	21775518	21775695	NA	NA	NA	0.00425532	de_novo	NA	NA	NA	NA	NA	NA	NA	NA
D907_N	con48_roo	3R	22354292	22354299	NA	NA	NA	0.0954774	de_novo	NA	NA	NA	NA	NA	NA	NA	NA
D907_N	con48_roo	3R	30843955	30844132	NA	NA	NA	0.00408163	de_novo	NA	NA	NA	NA	NA	NA	NA	NA
D907_N	con48_roo	X	9247089	9247266	NA	NA	NA	0.00719424	de_novo	NA	NA	NA	NA	NA	NA	NA	NA
D907_N	con48_roo	X	10896969	10897163	NA	NA	NA	0.00833333	de_novo	NA	NA	NA	NA	NA	NA	NA	NA
D907_N	con48_roo	X	11175620	11175797	NA	NA	NA	0.00414938	de_novo	NA	NA	NA	NA	NA	NA	NA	NA
D907_N	con4_GATE	3L	4342218	4342395	NA	NA	NA	0.00483092	de_novo	NA	NA	NA	NA	NA	NA	NA	NA
D907_N	con4_GATEa	3R	30065933	30066110	NA	NA	NA	0.004329	de_novo	NA	NA	NA	NA	NA	NA	NA	NA
D907_N	con4_GATEa	X	3284647	3284824	NA	NA	NA	0.00621118	de_novo	NA	NA	NA	NA	NA	NA	NA	NA
D907_N	con4_invader6	3R	25870526	25870703	NA	NA	NA	0.00680272	de_novo	NA	NA	NA	NA	NA	NA	NA	NA
D907_N	con5_Cr1a	2R	13275748	13275925	NA	NA	NA	0.00444444	de_novo	NA	NA	NA	NA	NA	NA	NA	NA
D907_N	con5_Cr1a	2R	24582605	24582782	NA	NA	NA	0.003367	de_novo	NA	NA	NA	NA	NA	NA	NA	NA
D907_N	con5_Cr1a	3L	15993494	15993671	NA	NA	NA	0.00571429	de_novo	NA	NA	NA	NA	NA	NA	NA	NA
D907_N	con5_Cr1a	3R	10643856	10644033	NA	NA	NA	0.00487805	de_novo	NA	NA	NA	NA	NA	NA	NA	NA
D907_N	con5_Cr1a	3R	27219527	27219704	NA	NA	NA	0.00540541	de_novo	NA	NA	NA	NA	NA	NA	NA	NA
D907_N	con7_Dm88	3R	19327207	19327384	NA	NA	NA	0.00621118	de_novo	NA	NA	NA	NA	NA	NA	NA	NA
D907_N	con7_Dm88	3R	24986930	24987107	NA	NA	NA	0.003861	de_novo	NA	NA	NA	NA	NA	NA	NA	NA
D907_N	con7_G6a	2L	9163655	9163832	NA	NA	NA	0.00591716	de_novo	NA	NA	NA	NA	NA	NA	NA	NA
D907_N	con7_UnFmcl002_RXX-LARD	3L	1559622	1559866	NA	NA	NA	0.0111111	de_novo	NA	NA	NA	NA	NA	NA	NA	NA
D907_N	con7_UnFmcl002_RXX-LARD	3L	7994360	7994537	NA	NA	NA	0.00591716	de_novo	NA	NA	NA	NA	NA	NA	NA	NA
D907_N	con7_UnFmcl002_RXX-LARD	3R	9613560	9613737	NA	NA	NA	0.00487805	de_novo	NA	NA	NA	NA	NA	NA	NA	NA
D907_N	con8_G2	2L	2150845	2151022	NA	NA	NA	0.00518135	de_novo	NA	NA	NA	NA	NA	NA	NA	NA
D907_N	con8_G2	2L	12303469	12303646	NA	NA	NA	0.00699301	de_novo	NA	NA	NA	NA	NA	NA	NA	NA
D907_N	con8_G2	3R	8415370	8415547	NA	NA	NA	0.00518135	de_novo	NA	NA	NA	NA	NA	NA	NA	NA
D907_N	con8_G2	3R	18790318	18790495	NA	NA	NA	0.00473934	de_novo	NA	NA	NA	NA	NA	NA	NA	NA
D907_N	con8_G2	X	17070120	17070297	NA	NA	NA	0.00892857	de_novo	NA	NA	NA	NA	NA	NA	NA	NA
D907_N	con8_gypsy4	2L	17827911	17828088	NA	NA	NA	0.00571429	de_novo	NA	NA	NA	NA	NA	NA	NA	NA
D907_N	con8_gypsy4	2R	8703258	8703435	NA	NA	NA	0.00436681	de_novo	NA	NA	NA	NA	NA	NA	NA	NA
D907_N	con8_gypsy4	X	8041154	8041331	NA	NA	NA	0.00332226	de_novo	NA	NA	NA	NA	NA	NA	NA	NA
D907_N	con8_invader1	2L	2827666	2827843	NA	NA	NA	0.00564972	de_novo	NA	NA	NA	NA	NA	NA	NA	NA
D907_N	con8_invader1	X	16510018	16510195	NA	NA	NA	0.00507614	de_novo	NA	NA	NA	NA	NA	NA	NA	NA
D907_N	con9_Bari1	2L	13210368	13210545	NA	NA	NA	0.00598802	de_novo	NA	NA	NA	NA	NA	NA	NA	NA
D907_N	con9_Bari1	2R	7008444	7008621	NA	NA	NA	0.00473934	de_novo	NA	NA	NA	NA	NA	NA	NA	NA
D907_N	con9_Bari1	2R	8932223	8932400	NA	NA	NA	0.00440529	de_novo	NA	NA	NA	NA	NA	NA	NA	NA
D907_N	con9_Bari1	3L	9354992	9355169	NA	NA	NA	0.00606061	de_novo	NA	NA	NA	NA	NA	NA	NA	NA
D907_N	con9_Bari1	3L	11730743	11730920	NA	NA	NA	0.00502513	de_novo	NA	NA	NA	NA	NA	NA	NA	NA
D907_N	con9_Bari1	3L	13847390	13847567	NA	NA	NA	0.00497512	de_novo	NA	NA	NA	NA	NA	NA	NA	NA
D907_N	con9_Bari1	3R	13633192	13633369	NA	NA	NA	0.00492611	de_novo	NA	NA	NA	NA	NA	NA	NA	NA
D907_N	con9_Bari1	X	2258772	2258949	NA	NA	NA	0.00840336	de_novo	NA	NA	NA	NA	NA	NA	NA	NA
D907_N	con9_UnFUnCl001_DTX-incomp	2R	18639127	18639304	NA	NA	NA	0.00483092	de_novo	NA	NA	NA	NA	NA	NA	NA	NA
D907_N	con2_NOF	3R	8929472	8929850	NA	NA	0.253731	0.418182	A-N	NA	0.0274	0.0274	NA	NA	NA	NA	NA
D907_N	con48_roo	2R	22597931	22598237	NA	NA	0.00729927	0.049505	A-N	NA	0.0843	0.0843	NA	NA	NA	NA	NA
D907_N	con3_G6b;con7_G6a;con7_G6a	2R	6488848	6490881	NA	NA	0.0215827	0.0364964	A-N	NA	0.719	0.719	NA	NA	NA	NA	NA
D907_N	con11_mariner2	X	9528638	9528815	NA	NA	0.00478469	0.00578035	A-N	NA	1	1	NA	NA	NA	NA	NA
D907_N	con17_Max-element	X	8727245	8727422	NA	NA	0.00534759	0.008	A-N	NA	1	1	NA	NA	NA	NA	NA
D907_N	con33_17-6	2L	8583581	8583758	NA	NA	0.00465116	0.00598802	A-N	NA	1	1	NA	NA	NA	NA	NA
D907_N	con48_roo	X	18049810	18049993	NA	NA	1	1	A-N	NA	1	1	NA	NA	NA	NA	NA
D907_N	con48_roo	X	19968425	19968602	NA	NA	0.00840336	0.00729927	A-N	NA	1	1	NA	NA	NA	NA	NA
D907_N	con4_GATEa	2R	7462257	7462434	NA	NA	0.00341297	0.00436681	A-N	NA	1	1	NA	NA	NA	NA	NA
D907_N	con24_X-element	X	9577224	9577248	NA	1	NA	NA	C	NA	1	1	1	1	1	1	1
D907_N	con15_pogo	3R	29760413	29761560	NA	0.0044843	NA	NA	C	NA	NA	NA	NA	NA	NA	NA	NA
D907_N	con3_G4	3R	7080694	7081436	NA	0.0052356	NA	NA	C	NA	NA	NA	NA	NA	NA	NA	NA
D907_N	DNAREP1_INE-1;UnFUnClUnAlig_DHX-incomp_COR;con7_Dbuz-INE-1	X	14719171	14719670	0.00591716	NA	NA	NA	P0	NA	NA	NA	NA	NA	NA	NA	NA
D907_N	con11_hopper	3L	4782274	4782464	1	NA	NA	NA	P0	NA	NA	NA	NA	NA	NA	NA	NA
D907_N	con13_Tc1	X	19695318	19696943	0.00689655	NA	NA	NA	P0	NA	NA	NA	NA	NA	NA	NA	NA
D907_N	con14_Juan	3L	2991333	2991466	0.252525	NA	NA	NA	P0	NA	NA	NA	NA	NA	NA	NA	NA
D907_N	con20_jockey	3R	13195933	13196126	0.275676	NA	NA	NA	P0	NA	NA	NA	NA	NA	NA	NA	NA
D907_N	con7_UnFmcl002_RXX-LARD	X	9955849	9957020	0.00613497	NA	NA	NA	P0	NA	NA	NA	NA	NA	NA	NA	NA
D907_N	BDGP_Circe	3L	8718383	8718560	NA	NA	NA	0.00167504	de_novo_not_considered	NA	NA	NA	NA	NA	NA	NA	NA
D907_N	BDGP_Circe	3L	17828655	17828832	NA	NA	NA	0.00578035	de_novo_not_considered	NA	NA	NA	NA	NA	NA	NA	NA
D907_N	BDGP_R2-element	3L	8929242	8929419	NA	NA	NA	0.00473934	de_novo_not_considered	NA	NA	NA	NA	NA	NA	NA	NA
D907_N	BDGP_R2-element	X	3260673	3260850	NA	NA	NA	0.00546448	de_novo_not_considered	NA	NA	NA	NA	NA	NA	NA	NA
D907_N	BDGP_R2-element	X	16077017	16077194	NA	NA	NA	0.0107527	de_novo_not_considered	NA	NA	NA	NA	NA	NA	NA	NA
D907_N	BDGP_TART-C	3R	27804254	27804431	NA	NA	NA	0.00497512	de_novo_not_considered	NA	NA	NA	NA	NA	NA	NA	NA
D907_N	BDGP_baggins	3L	8263257	8263434	NA	NA	NA	0.00469484	de_novo_not_considered	NA	NA	NA	NA	NA	NA	NA	NA
D907_N	UnFUnClUnAlig_RLX-incomp_COR	2L	728153	728330	NA	NA	NA	0.00460829	de_novo_not_considered	NA	NA	NA	NA	NA	NA	NA	NA
D907_N	UnFUnClUnAlig_RLX-incomp_FIN	3R	13538899	13539076	NA	NA	NA	0.00671141	de_novo_not_considered	NA	NA	NA	NA	NA	NA	NA	NA
D907_N	con11_hopper	3L	8951615	8951760	NA	NA	NA	0.553073	de_novo_not_considered	NA	NA	NA	NA	NA	NA	NA	NA
D907_N	con11_hopper	3R	13356995	13357122	NA	NA	NA	0.118483	de_novo_not_considered	NA	NA	NA	NA	NA	NA	NA	NA
D907_N	con11_hopper	3R	13732226	13732355	NA	NA	NA	0.112108	de_novo_not_considered	NA	NA	NA	NA	NA	NA	NA	NA
D907_N	con12_Doc	2L	7334263	7334440	NA	NA	NA	0.00473934	de_novo_not_considered	NA	NA	NA	NA	NA	NA	NA	NA
D907_N	con12_Doc	X	10748657	10748834	NA	NA	NA	0.0117647	de_novo_not_considered	NA	NA	NA	NA	NA	NA	NA	NA
D907_N	con12_TAHRE	3L	13183683	13183860	NA	NA	NA	0.01	de_novo_not_considered	NA	NA	NA	NA	NA	NA	NA	NA
D907_N	con13_Tc1	X	7489652	7489829	NA	NA	NA	0.00980392	de_novo_not_considered	NA	NA	NA	NA	NA	NA	NA	NA
D907_N	con13_UnFmcl013_RLX-incomp	3R	26346505	26346682	NA	NA	NA	0.00534759	de_novo_not_considered	NA	NA	NA	NA	NA	NA	NA	NA
D907_N	con13_UnFmcl013_RLX-incomp	X	7633983	7634160	NA	NA	NA	0.00613497	de_novo_not_considered	NA	NA	NA	NA	NA	NA	NA	NA
D907_N	con13_UnFmcl013_RLX-incomp	X	7965148	7965325	NA	NA	NA	0.00636943	de_novo_not_considered	NA	NA	NA	NA	NA	NA	NA	NA
D907_N	con14_F-element	3R	28147210	28147387	NA	NA	NA	0.00645161	de_novo_not_considered	NA	NA	NA	NA	NA	NA	NA	NA
D907_N	con14_F-element	X	9998272	9998449	NA	NA	NA	0.00645161	de_novo_not_considered	NA	NA	NA	NA	NA	NA	NA	NA
D907_N	con14_F-element	X	11682818	11682995	NA	NA	NA	0.00346021	de_novo_not_considered	NA	NA	NA	NA	NA	NA	NA	NA
D907_N	con14_F-element	X	18105196	18105373	NA	NA	NA	0.00740741	de_novo_not_considered	NA	NA	NA	NA	NA	NA	NA	NA
D907_N	con15_Rt1b	2L	4054795	4054972	NA	NA	NA	0.00534759	de_novo_not_considered	NA	NA	NA	NA	NA	NA	NA	NA
D907_N	con15_Rt1b	3L	15544190	15544367	NA	NA	NA	0.00456621	de_novo_not_considered	NA	NA	NA	NA	NA	NA	NA	NA
D907_N	con15_flea	X	4786074	4786251	NA	NA	NA	0.00460829	de_novo_not_considered	NA	NA	NA	NA	NA	NA	NA	NA
D907_N	con15_pogo	3R	8858837	8859148	NA	NA	NA	0.426667	de_novo_not_considered	NA	NA	NA	NA	NA	NA	NA	NA
D907_N	con16_blood	3L	6796323	6796500	NA	NA	NA	0.00460829	de_novo_not_considered	NA	NA	NA	NA	NA	NA	NA	NA
D907_N	con17_Max-element	3L	7090418	7090595	NA	NA	NA	0.00483092	de_novo_not_considered	NA	NA	NA	NA	NA	NA	NA	NA
D907_N	con20_jockey	3R	23823828	23824005	NA	NA	NA	0.0052356	de_novo_not_considered	NA	NA	NA	NA	NA	NA	NA	NA
D907_N	con21_HeT-A	3L	1767283	1767460	NA	NA	NA	0.00404858	de_novo_not_considered	NA	NA	NA	NA	NA	NA	NA	NA
D907_N	con21_HeT-A	3L	6988719	6988896	NA	NA	NA	0.00487805	de_novo_not_considered	NA	NA	NA	NA	NA	NA	NA	NA
D907_N	con24_X-element	X	14602197	14602374	NA	NA	NA	0.00374532	de_novo_not_considered	NA	NA	NA	NA	NA	NA	NA	NA
D907_N	con25_1360	2R	14369391	14369568	NA	NA	NA	0.00689655	de_novo_not_considered	NA	NA	NA	NA	NA	NA	NA	NA
D907_N	con25_1360	2R	17008829	17009006	NA	NA	NA	0.00502513	de_novo_not_considered	NA	NA	NA	NA	NA	NA	NA	NA
D907_N	con25_1360	3R	16270334	16270511	NA	NA	NA	0.00529101	de_novo_not_considered	NA	NA	NA	NA	NA	NA	NA	NA
D907_N	con25_1360	3R	21217251	21217439	NA	NA	NA	0.00961538	de_novo_not_considered	NA	NA	NA	NA	NA	NA	NA	NA
D907_N	con25_1360	3R	21288892	21289069	NA	NA	NA	0.00460829	de_novo_not_considered	NA	NA	NA	NA	NA	NA	NA	NA
D907_N	con25_opus	3R	29730530	29730707	NA	NA	NA	0.00571429	de_novo_not_considered	NA	NA	NA	NA	NA	NA	NA	NA
D907_N	con26_BS	2R	6890337	6890514	NA	NA	NA	0.00460829	de_novo_not_considered	NA	NA	NA	NA	NA	NA	NA	NA
D907_N	con26_Tirant	3L	14447067	14447244	NA	NA	NA	0.00460829	de_novo_not_considered	NA	NA	NA	NA	NA	NA	NA	NA
D907_N	con26_mdg3	X	4135329	4135506	NA	NA	NA	0.00334448	de_novo_not_considered	NA	NA	NA	NA	NA	NA	NA	NA
D907_N	con2_NOF	3R	8351143	8351320	NA	NA	NA	0.0044843	de_novo_not_considered	NA	NA	NA	NA	NA	NA	NA	NA
D907_N	con33_17-6	3L	5731300	5731477	NA	NA	NA	0.00653595	de_novo_not_considered	NA	NA	NA	NA	NA	NA	NA	NA
D907_N	con3_Tc1-2	3L	8730594	8730771	NA	NA	NA	0.00125156	de_novo_not_considered	NA	NA	NA	NA	NA	NA	NA	NA
D907_N	con41_UnFmcl001_RLX-incomp	3L	7570837	7571014	NA	NA	NA	0.00540541	de_novo_not_considered	NA	NA	NA	NA	NA	NA	NA	NA
D907_N	con41_UnFmcl001_RLX-incomp	3R	24128665	24128842	NA	NA	NA	0.00436681	de_novo_not_considered	NA	NA	NA	NA	NA	NA	NA	NA
D907_N	con41_UnFmcl001_RLX-incomp	3R	27152094	27152104	NA	NA	NA	0.22807	de_novo_not_considered	NA	NA	NA	NA	NA	NA	NA	NA
D907_N	con41_UnFmcl001_RLX-incomp	X	5104118	5104295	NA	NA	NA	0.00564972	de_novo_not_considered	NA	NA	NA	NA	NA	NA	NA	NA
D907_N	con41_UnFmcl001_RLX-incomp	X	12780229	12780327	NA	NA	NA	0.190184	de_novo_not_considered	NA	NA	NA	NA	NA	NA	NA	NA
D907_N	con46_297	3R	24224093	24224270	NA	NA	NA	0.003861	de_novo_not_considered	NA	NA	NA	NA	NA	NA	NA	NA
D907_N	con48_412	2L	10144971	10145148	NA	NA	NA	0.00518135	de_novo_not_considered	NA	NA	NA	NA	NA	NA	NA	NA
D907_N	con48_roo	2R	7982808	7982985	NA	NA	NA	0.00355872	de_novo_not_considered	NA	NA	NA	NA	NA	NA	NA	NA
D907_N	con48_roo	X	4694118	4694295	NA	NA	NA	0.00473934	de_novo_not_considered	NA	NA	NA	NA	NA	NA	NA	NA
D907_N	con48_roo	X	9716755	9717044	NA	NA	NA	0.00900901	de_novo_not_considered	NA	NA	NA	NA	NA	NA	NA	NA
D907_N	con48_roo	X	20689408	20689585	NA	NA	NA	0.00689655	de_novo_not_considered	NA	NA	NA	NA	NA	NA	NA	NA
D907_N	con4_GATEa	2L	5744542	5744719	NA	NA	NA	0.00534759	de_novo_not_considered	NA	NA	NA	NA	NA	NA	NA	NA
D907_N	con4_GATEa	2L	12585647	12585824	NA	NA	NA	0.00473934	de_novo_not_considered	NA	NA	NA	NA	NA	NA	NA	NA
D907_N	con4_GATEa	2R	23135847	23136024	NA	NA	NA	0.00411523	de_novo_not_considered	NA	NA	NA	NA	NA	NA	NA	NA
D907_N	con4_GATEa	3R	28673761	28673938	NA	NA	NA	0.0052356	de_novo_not_considered	NA	NA	NA	NA	NA	NA	NA	NA
D907_N	con5_Cr1a	2L	8563030	8563207	NA	NA	NA	0.00469484	de_novo_not_considered	NA	NA	NA	NA	NA	NA	NA	NA
D907_N	con5_Cr1a	2R	20131894	20132071	NA	NA	NA	0.00507614	de_novo_not_considered	NA	NA	NA	NA	NA	NA	NA	NA
D907_N	con5_Cr1a	3L	9443490	9443738	NA	NA	NA	0.0357143	de_novo_not_considered	NA	NA	NA	NA	NA	NA	NA	NA
D907_N	con5_Cr1a	X	7040282	7040459	NA	NA	NA	0.00408163	de_novo_not_considered	NA	NA	NA	NA	NA	NA	NA	NA
D907_N	con7_Dbuz-INE-1	X	10129948	10130125	NA	NA	NA	0.00740741	de_novo_not_considered	NA	NA	NA	NA	NA	NA	NA	NA
D907_N	con8_G2	2R	16196944	16197121	NA	NA	NA	0.00452489	de_novo_not_considered	NA	NA	NA	NA	NA	NA	NA	NA
D907_N	con8_G2	3R	11115798	11115975	NA	NA	NA	0.00606061	de_novo_not_considered	NA	NA	NA	NA	NA	NA	NA	NA
D907_N	con8_G2	X	5018299	5018476	NA	NA	NA	0.00518135	de_novo_not_considered	NA	NA	NA	NA	NA	NA	NA	NA
D907_N	con8_gypsy4	2R	18001375	18001552	NA	NA	NA	0.00591716	de_novo_not_considered	NA	NA	NA	NA	NA	NA	NA	NA
D907_N	con8_invader1	3R	27175489	27175666	NA	NA	NA	0.003663	de_novo_not_considered	NA	NA	NA	NA	NA	NA	NA	NA
D907_N	con9_Bari1	2L	4032207	4032384	NA	NA	NA	0.00578035	de_novo_not_considered	NA	NA	NA	NA	NA	NA	NA	NA
D907_N	con41_UnFmcl001_RLX-incomp	X	9043654	9043667	NA	NA	NA	NA	no_data	NA	4.99e-10	NA	NA	NA	4.99e-10	NA	NA
D907_N	BDGP_BS3	2L	16163405	16163505	NA	NA	0.00980392	NA	no_data	NA	NA	NA	NA	NA	NA	NA	NA
D907_N	BDGP_Circe	2R	6419004	6419825	NA	NA	NA	NA	no_data	NA	NA	NA	NA	NA	NA	NA	NA
D907_N	BDGP_G5	3R	16004314	16004413	NA	NA	NA	NA	no_data	NA	NA	NA	NA	NA	NA	NA	NA
D907_N	BDGP_G5A	3L	11837764	11837959	NA	NA	NA	NA	no_data	NA	NA	NA	NA	NA	NA	NA	NA
D907_N	BDGP_G5A	3R	7060658	7060731	NA	NA	NA	NA	no_data	NA	NA	NA	NA	NA	NA	NA	NA
D907_N	BDGP_G5A	X	2426004	2426434	NA	NA	NA	NA	no_data	NA	NA	NA	NA	NA	NA	NA	NA
D907_N	BDGP_G5A	X	5873664	5873866	NA	NA	NA	NA	no_data	NA	NA	NA	NA	NA	NA	NA	NA
D907_N	BDGP_G5A	X	19666230	19666846	NA	NA	NA	NA	no_data	NA	NA	NA	NA	NA	NA	NA	NA
D907_N	BDGP_Helena	3R	7475559	7475799	NA	NA	NA	NA	no_data	NA	NA	NA	NA	NA	NA	NA	NA
D907_N	BDGP_Q-element;con5_Cr1a;con5_Cr1a	3R	8042711	8043821	NA	NA	NA	NA	no_data	NA	NA	NA	NA	NA	NA	NA	NA
D907_N	BDGP_TART-A	3L	16576993	16577221	NA	NA	NA	NA	no_data	NA	NA	NA	NA	NA	NA	NA	NA
D907_N	BDGP_TART-A	3L	16577524	16577693	NA	NA	NA	NA	no_data	NA	NA	NA	NA	NA	NA	NA	NA
D907_N	BDGP_gypsy2	3L	18470324	18471291	NA	NA	NA	NA	no_data	NA	NA	NA	NA	NA	NA	NA	NA
D907_N	BDGP_jockey2	2R	8436899	8437119	NA	NA	NA	NA	no_data	NA	NA	NA	NA	NA	NA	NA	NA
D907_N	BDGP_jockey2	X	15746342	15746496	NA	NA	NA	NA	no_data	NA	NA	NA	NA	NA	NA	NA	NA
D907_N	BDGP_jockey2	X	21171512	21172860	NA	NA	NA	NA	no_data	NA	NA	NA	NA	NA	NA	NA	NA
D907_N	BDGP_rooA	2R	6327008	6327802	NA	NA	NA	NA	no_data	NA	NA	NA	NA	NA	NA	NA	NA
D907_N	BDGP_rooA	2R	6327900	6327982	NA	NA	NA	NA	no_data	NA	NA	NA	NA	NA	NA	NA	NA
D907_N	BDGP_rooA	2R	6328139	6328264	NA	NA	NA	NA	no_data	NA	NA	NA	NA	NA	NA	NA	NA
D907_N	BDGP_transib4	X	6755779	6755933	NA	NA	NA	NA	no_data	NA	NA	NA	NA	NA	NA	NA	NA
D907_N	BDGP_transib4	X	6755954	6756203	NA	NA	NA	NA	no_data	NA	NA	NA	NA	NA	NA	NA	NA
D907_N	DNAREP1_INE-1	2L	5120269	5120404	NA	NA	NA	NA	no_data	NA	NA	NA	NA	NA	NA	NA	NA
D907_N	DNAREP1_INE-1	2R	6160988	6161247	NA	NA	NA	NA	no_data	NA	NA	NA	NA	NA	NA	NA	NA
D907_N	DNAREP1_INE-1	2R	6198281	6198341	NA	NA	NA	NA	no_data	NA	NA	NA	NA	NA	NA	NA	NA
D907_N	DNAREP1_INE-1	2R	7022603	7022663	NA	NA	NA	NA	no_data	NA	NA	NA	NA	NA	NA	NA	NA
D907_N	DNAREP1_INE-1	2R	11352780	11353111	NA	NA	NA	NA	no_data	NA	NA	NA	NA	NA	NA	NA	NA
D907_N	DNAREP1_INE-1	3L	17835827	17836177	NA	NA	NA	NA	no_data	NA	NA	NA	NA	NA	NA	NA	NA
D907_N	DNAREP1_INE-1	3L	18087753	18088077	NA	NA	NA	NA	no_data	NA	NA	NA	NA	NA	NA	NA	NA
D907_N	DNAREP1_INE-1	3R	7274478	7274739	NA	NA	NA	NA	no_data	NA	NA	NA	NA	NA	NA	NA	NA
D907_N	DNAREP1_INE-1	3R	18084419	18084611	NA	NA	NA	NA	no_data	NA	NA	NA	NA	NA	NA	NA	NA
D907_N	DNAREP1_INE-1	X	9160205	9160424	NA	NA	NA	NA	no_data	NA	NA	NA	NA	NA	NA	NA	NA
D907_N	DNAREP1_INE-1	X	14314312	14314415	NA	NA	NA	NA	no_data	NA	NA	NA	NA	NA	NA	NA	NA
D907_N	DNAREP1_INE-1	X	14583198	14583469	NA	NA	NA	NA	no_data	NA	NA	NA	NA	NA	NA	NA	NA
D907_N	DNAREP1_INE-1	X	14815571	14815830	NA	NA	NA	NA	no_data	NA	NA	NA	NA	NA	NA	NA	NA
D907_N	DNAREP1_INE-1	X	15408774	15408897	NA	NA	NA	NA	no_data	NA	NA	NA	NA	NA	NA	NA	NA
D907_N	DNAREP1_INE-1	X	16838012	16838098	NA	NA	NA	NA	no_data	NA	NA	NA	NA	NA	NA	NA	NA
D907_N	DNAREP1_INE-1	X	19330616	19330843	NA	NA	NA	NA	no_data	NA	NA	NA	NA	NA	NA	NA	NA
D907_N	DNAREP1_INE-1	X	19809911	19810254	NA	NA	NA	NA	no_data	NA	NA	NA	NA	NA	NA	NA	NA
D907_N	DNAREP1_INE-1	X	19998800	19999082	NA	NA	NA	NA	no_data	NA	NA	NA	NA	NA	NA	NA	NA
[truncated: 5,355 more rows]
