# Supplementary material for: The mechanistic basis of genetic assimilation in natural fly populations
Source: Research Square preprint supplement (doi:10.21203/rs.3.rs-4258726/v1), 2024-05-10
Supplement: Supplementary file 2 [file 63589da553118c8a09745402.xlsx]

## Sheet: Bloomington
Extended Data Table 4 | Fly stocks
a. Flies obtained from Bloomington Drosophila Stock Center
Line	Bloomington ID	Genotype
D907	28262	Drosophila Genetic Reference Panel strain - sequenced isogenic reference wild type strain (aka 'Raleigh' or 'Mackay' line).
D208	25174	Drosophila Genetic Reference Panel strain - sequenced isogenic reference wild type strain (aka 'Raleigh' or 'Mackay' line).
D437	25194	Drosophila Genetic Reference Panel strain - sequenced isogenic reference wild type strain (aka 'Raleigh' or 'Mackay' line).
D820	25208	Drosophila Genetic Reference Panel strain - sequenced isogenic reference wild type strain (aka 'Raleigh' or 'Mackay' line).
nub-GAL4	25754	P{w[+mC]=UAS-Dcr-2.D}1, w[1118]; P{w[+mW.hs]=GawB}nubbin-AC-62
A9-GAL4	8761	P{w[+m*]=GAL4}A9, w[*]
GFP-RNAi (control Figure 2b)	9331	w[1118]; P{w[+mC]=UAS-GFP.RNAi.R}143
Hsp83[e6A]	36576	w[*]; Hsp83[e6A]/TM6B, Tb[1]
UAS-GFP-NLS (control Figure 2c,e)	4775	w[1118]; P{w[+mC]=UAS-GFP.nls}14
b. Flies obtained from Vienna Drosophila Resource Center
RNAi target gene	VDRC ID	VDRC Library
CG4250	101949	KK
Pxd	48587	GD
Cad96Ca	8402	GD
tx	102831	KK
Vajk1	38026	GD
CG5144	104240	KK
CG8907	105372	KK
Cyp9c1	109463	KK
kibra	106507	KK
Hsp83	108568	KK
c. Flies obtained from FlyORF
UAS-ORF library line	Fly Line ID
CG4250	F003914
