# Supplementary material for: The mechanistic basis of genetic assimilation in natural fly populations
Source: Research Square preprint supplement (doi:10.21203/rs.3.rs-4258726/v1), 2024-05-10
Supplement: Supplementary file 3 [file 6c7697cb8c1347467888243b.xlsx]

## Sheet: Sheet1
Extended Data Table 7 | NGS data produced in this work
Experiment	GEO SuperSerie	GEO Serie	Antibody	Tissue	Condition	Replicate	GEO Accession
Pool-seq	GSE255496	GSE255257	-	Adult females	D907_P0	1 (a pool of 100 female adult flies)	GSM8067689
Pool-seq			-	Adult females	D907_Control	1 (a pool of 100 female adult flies)	GSM8067687
Pool-seq			-	Adult females	D907_Assimilated	1 (a pool of 100 female adult flies)	GSM8067686
Pool-seq			-	Adult females	D907_Non-assimilated	1 (a pool of 100 female adult flies)	GSM8067688
CUT&RUN		GSE255491	H3K9me3 (Abcam, Cat. AB8898)	Wing disc	D907_Assimilated	1	GSM8073292
CUT&RUN			H3K9me3 (Abcam, Cat. AB8898)	Wing disc	D907_Assimilated	2	GSM8073293
CUT&RUN			H3K9me3 (Abcam, Cat. AB8898)	Wing disc	D907_Control	1	GSM8073294
CUT&RUN			H3K9me3 (Abcam, Cat. AB8898)	Wing disc	D907_Control	2	GSM8073295
CUT&RUN			H3K9me3 (Abcam, Cat. AB8898)	Wing disc	D907_Non-assimilated	1	GSM8073296
CUT&RUN			H3K9me3 (Abcam, Cat. AB8898)	Wing disc	D907_Non-assimilated	2	GSM8073297
CUT&RUN			Rabbit IgG (CST, Cat. 2729)	Wing disc	D907_Control	1	GSM8073298
CUT&RUN			H3K27ac (Active Motif, Cat. 39134)	Wing disc	Mix_Assimilated	1	GSM8073299
CUT&RUN			H3K27ac (Active Motif, Cat. 39134)	Wing disc	Mix_Assimilated	2	GSM8073300
CUT&RUN			H3K27ac (Active Motif, Cat. 39134)	Wing disc	Mix_Assimilated	3	GSM8073301
CUT&RUN			H3K27ac (Active Motif, Cat. 39134)	Wing disc	Mix_Control	1	GSM8073302
CUT&RUN			H3K27ac (Active Motif, Cat. 39134)	Wing disc	Mix_Control	2	GSM8073303
CUT&RUN			H3K27ac (Active Motif, Cat. 39134)	Wing disc	Mix_Control	3	GSM8073304
CUT&RUN			H3K27ac (Active Motif, Cat. 39134)	Wing disc	Mix_Non-assimilated	1	GSM8073305
CUT&RUN			H3K27ac (Active Motif, Cat. 39134)	Wing disc	Mix_Non-assimilated	2	GSM8073306
CUT&RUN			H3K27ac (Active Motif, Cat. 39134)	Wing disc	Mix_Non-assimilated	3	GSM8073307
CUT&RUN			Rabbit IgG (CST, Cat. 2729)	Wing disc	Mix_Control	1	GSM8073308
RNAseq		GSE255494	-	Wing disc	D907_Assimilated	1	GSM8073317
RNAseq			-	Wing disc	D907_Assimilated	2	GSM8073318
RNAseq			-	Wing disc	D907_Assimilated	3	GSM8073319
RNAseq			-	Wing disc	D907_Assimilated	4	GSM8073320
RNAseq			-	Wing disc	D907_Control	1	GSM8073321
RNAseq			-	Wing disc	D907_Control	2	GSM8073322
RNAseq			-	Wing disc	D907_Control	3	GSM8073323
RNAseq			-	Wing disc	D907_Control	4	GSM8073324
RNAseq			-	Wing disc	D907_Non-assimilated	1	GSM8073325
RNAseq			-	Wing disc	D907_Non-assimilated	2	GSM8073326
RNAseq			-	Wing disc	D907_Non-assimilated	3	GSM8073327
RNAseq			-	Wing disc	D907_Non-assimilated	4	GSM8073328
RNAseq			-	Pupal wing	D907_Assimilated	1	GSM8073329
RNAseq			-	Pupal wing	D907_Assimilated	2	GSM8073330
RNAseq			-	Pupal wing	D907_Assimilated	3	GSM8073331
RNAseq			-	Pupal wing	D907_Assimilated	4	GSM8073332
RNAseq			-	Pupal wing	D907_Control	1	GSM8073333
RNAseq			-	Pupal wing	D907_Control	2	GSM8073334
RNAseq			-	Pupal wing	D907_Control	3	GSM8073335
RNAseq			-	Pupal wing	D907_Control	4	GSM8073336
RNAseq			-	Pupal wing	D907_Non-assimilated	1	GSM8073337
RNAseq			-	Pupal wing	D907_Non-assimilated	2	GSM8073338
RNAseq			-	Pupal wing	D907_Non-assimilated	3	GSM8073339
RNAseq			-	Pupal wing	D907_Non-assimilated	4	GSM8073340
RNAseq			-	Wing disc	Mix_Assimilated_Exp.1	1	GSM8073341
RNAseq			-	Wing disc	Mix_Assimilated_Exp.1	2	GSM8073342
RNAseq			-	Wing disc	Mix_Assimilated_Exp.1	3	GSM8073343
RNAseq			-	Wing disc	Mix_Assimilated_Exp.1	4	GSM8073344
RNAseq			-	Wing disc	Mix_Control_Exp.1	1	GSM8073345
RNAseq			-	Wing disc	Mix_Control_Exp.1	2	GSM8073346
RNAseq			-	Wing disc	Mix_Control_Exp.1	3	GSM8073347
RNAseq			-	Wing disc	Mix_Control_Exp.1	4	GSM8073348
RNAseq			-	Wing disc	Mix_Non-assimilated_Exp.1	1	GSM8073349
RNAseq			-	Wing disc	Mix_Non-assimilated_Exp.1	2	GSM8073350
RNAseq			-	Wing disc	Mix_Non-assimilated_Exp.1	3	GSM8073351
RNAseq			-	Wing disc	Mix_Non-assimilated_Exp.1	4	GSM8073352
RNAseq			-	Pupal wing	Mix_Assimilated_Exp.1	1	GSM8073353
RNAseq			-	Pupal wing	Mix_Assimilated_Exp.1	2	GSM8073354
RNAseq			-	Pupal wing	Mix_Assimilated_Exp.1	3	GSM8073355
RNAseq			-	Pupal wing	Mix_Assimilated_Exp.1	4	GSM8073356
RNAseq			-	Pupal wing	Mix_Control_Exp.1	1	GSM8073357
RNAseq			-	Pupal wing	Mix_Control_Exp.1	2	GSM8073358
RNAseq			-	Pupal wing	Mix_Control_Exp.1	3	GSM8073359
RNAseq			-	Pupal wing	Mix_Control_Exp.1	4	GSM8073360
RNAseq			-	Pupal wing	Mix_Non-assimilated_Exp.1	1	GSM8073361
RNAseq			-	Pupal wing	Mix_Non-assimilated_Exp.1	2	GSM8073362
RNAseq			-	Pupal wing	Mix_Non-assimilated_Exp.1	3	GSM8073363
RNAseq			-	Pupal wing	Mix_Non-assimilated_Exp.1	4	GSM8073364
RNAseq			-	Wing disc	Mix_Assimilated_Exp.2	1	GSM8073365
RNAseq			-	Wing disc	Mix_Assimilated_Exp.2	2	GSM8073366
RNAseq			-	Wing disc	Mix_Assimilated_Exp.2	3	GSM8073367
RNAseq			-	Wing disc	Mix_Assimilated_Exp.2	4	GSM8073368
RNAseq			-	Wing disc	Mix_Control_Exp.2	1	GSM8073369
RNAseq			-	Wing disc	Mix_Control_Exp.2	2	GSM8073370
RNAseq			-	Wing disc	Mix_Control_Exp.2	3	GSM8073371
RNAseq			-	Wing disc	Mix_Control_Exp.2	4	GSM8073372
RNAseq			-	Wing disc	Mix_Non-assimilated_Exp.2	1	GSM8073373
RNAseq			-	Wing disc	Mix_Non-assimilated_Exp.2	2	GSM8073374
RNAseq			-	Wing disc	Mix_Non-assimilated_Exp.2	3	GSM8073375
RNAseq			-	Wing disc	Mix_Non-assimilated_Exp.2	4	GSM8073376
RNAseq			-	Pupal wing	Mix_Assimilated_Exp.2	1	GSM8073377
RNAseq			-	Pupal wing	Mix_Assimilated_Exp.2	2	GSM8073378
RNAseq			-	Pupal wing	Mix_Assimilated_Exp.2	3	GSM8073379
RNAseq			-	Pupal wing	Mix_Assimilated_Exp.2	4	GSM8073380
RNAseq			-	Pupal wing	Mix_Control_Exp.2	1	GSM8073381
RNAseq			-	Pupal wing	Mix_Control_Exp.2	2	GSM8073382
RNAseq			-	Pupal wing	Mix_Control_Exp.2	3	GSM8073383
RNAseq			-	Pupal wing	Mix_Control_Exp.2	4	GSM8073384
RNAseq			-	Pupal wing	Mix_Non-assimilated_Exp.2	1	GSM8073385
RNAseq			-	Pupal wing	Mix_Non-assimilated_Exp.2	2	GSM8073386
RNAseq			-	Pupal wing	Mix_Non-assimilated_Exp.2	3	GSM8073387
RNAseq			-	Pupal wing	Mix_Non-assimilated_Exp.2	4	GSM8073388
Hi-C		GSE255258	-	Wing disc	D907_Assimilated	1	GSM8067698
Hi-C			-	Wing disc	D907_Control	1	GSM8067699
Hi-C			-	Wing disc	D907_Non-assimilated	1	GSM8067700
