# Supplementary material for: The mechanistic basis of genetic assimilation in natural fly populations
Source: Research Square preprint supplement (doi:10.21203/rs.3.rs-4258726/v1), 2024-05-10
Supplement: Supplementary file 4 [file 7541eb032751dbb2036c8927.xlsx]

## Sheet: Table content
Extended Data Table 2 | Transcriptome analysis D907 selection lines
A. Differentially Expressed Genes in D907 assimilated selection line in wing discs (WD) and pupal wings (PW).
B. Differentially Expressed Genes in D907 non-assimilated selection line in wing discs (WD) and pupal wings (PW).
C. Differential expression analysis (DESeq2) in D907 assimilated vs control in wing disc.
D. Differential expression analysis (DESeq2) in D907 assimilated vs control in pupal wing.
E. Differential expression analysis (DESeq2) in D907 non-assimilated vs control in wing disc.
F. Differential expression analysis (DESeq2) in D907 non-assimilated vs control in pupal wing.

## Sheet: A.DEGs_D907_A
Extended Data Table 2A | Differentially Expressed Genes in D907 assimilated selection line in wing discs (WD) and pupal wings (PW). (cut-off: padj<0.05 and |log2(FC)|>=0.58)
Wing disc							Pupal wing
Type	Symbol	GENEID	log2FC_WD_D907_A	padjust_WD_D907_A	Comment		Type	Symbol	GENEID	log2FC_PW_D907_A	padjust_PW_D907_A	Comment
up	Npc2b	FBgn0038198	3.49569	0.00336919			up	lncRNA:CR40469	FBgn0058469	7.63661	0.000153669
up	Sp212	FBgn0053329	1.80277	0.0269788			up	lncRNA:CR34335	FBgn0267910	5.68198	0.0172609
up	CG5281	FBgn0037902	1.27943	0.000320902			up	lncRNA:CR45102	FBgn0266549	5.26272	9.943e-05
up	CG6026	FBgn0038676	1.12275	0.00512004			up	mt:ND5	FBgn0013684	4.76966	0.000450011
up	Ssl2	FBgn0041780	0.83997	0.00745641			up	MtnA	FBgn0002868	4.20358	0.00778577
up	Sdr	FBgn0038279	0.753653	0.00538799			down	CG12592	FBgn0037811	-6.04488	0.000329187
down	CG15025	FBgn0038709	-8.46562	0.00105547			down	Unc-115b	FBgn0260463	-5.92661	0.000543167
down	Rh7	FBgn0036260	-7.20914	1.94285e-05			down	CG14855	FBgn0038260	-4.26169	1.63087e-12
down	Unc-115b	FBgn0260463	-7.04905	2.69087e-06			down	timeout	FBgn0038118	-1.21238	0.0239167
down	Tret1-2	FBgn0033644	-6.60572	0.0097393			down	Hsp83	FBgn0001233	-1.1055	0.00288737
down	CG33093	FBgn0053093	-6.566	0.0298385			down	CG14860	FBgn0038273	-1.0078	3.68192e-07
down	CG5493	FBgn0034364	-6.27219	0.000899412			down	CG12206	FBgn0029662	-0.912094	0.0193347
down	CG13315	FBgn0040827	-6.0583	0.000552205
down	Npc2h	FBgn0039801	-5.87641	0.0319804
down	AkhR	FBgn0025595	-5.84038	0.0308836
down	Fmo-1	FBgn0034943	-5.75755	0.0402348
down	CG11459	FBgn0037396	-5.21103	0.00198897
down	Gbp1	FBgn0034199	-5.09339	0.0033692
down	Ugt303A1	FBgn0040252	-5.05649	0.031817
down	CG5773	FBgn0034290	-5.01648	0.0146112
down	CCHa2	FBgn0038147	-5.01031	0.00660061
down	Cyp28d1	FBgn0031689	-5.00666	0.0047569
down	Fbp1	FBgn0000639	-4.79329	0.00104375
down	CG12592	FBgn0037811	-4.77503	7.11151e-11
down	Cpr100A	FBgn0039805	-4.59153	0.0103218
down	CG8100	FBgn0036410	-4.46456	0.0402348
down	dsb	FBgn0035290	-4.41898	6.27652e-05
down	Prat2	FBgn0041194	-4.3587	0.00276045
down	CG3999	FBgn0037801	-4.3316	0.00538799
down	CG8745	FBgn0036381	-4.27015	0.00526021
down	CG2233	FBgn0029990	-4.19957	0.00512004
down	Lip4	FBgn0032264	-4.15908	0.000822868
down	CG16926	FBgn0040732	-4.14577	0.00512004
down	CG33926	FBgn0053926	-4.12205	0.0146112
down	Apoltp	FBgn0032136	-4.08874	0.0308986
down	CG34136	FBgn0083972	-4.08862	0.0147303
down	hll	FBgn0286723	-4.03751	0.00096195
down	Gbp2	FBgn0034200	-3.97547	0.0169777
down	Tsp42Ek	FBgn0033133	-3.95916	0.0146112
down	GstD10	FBgn0042206	-3.95054	0.0146112
down	Lsd-1	FBgn0039114	-3.83717	0.000552205
down	CG30345	FBgn0050345	-3.70535	0.0233477
down	Srr	FBgn0037684	-3.68579	0.0328475
down	Obp83ef	FBgn0046876	-3.65653	0.0127674
down	CG8369	FBgn0040532	-3.62212	0.00925691
down	CG8738	FBgn0033321	-3.58453	0.0146112
down	Nepl21	FBgn0027578	-3.49429	0.0233477
down	CG43133	FBgn0262607	-3.49409	0.031817
down	CG6356	FBgn0039178	-3.49064	0.000660168
down	CG12926	FBgn0033437	-3.48807	0.0478608
down	CG5958	FBgn0031913	-3.46881	0.000170127
down	Hn	FBgn0001208	-3.46581	0.0151415
down	CG12116	FBgn0030041	-3.42111	0.0146112
down	NimC2	FBgn0028939	-3.40013	0.00512004
down	CG3397	FBgn0037975	-3.39611	0.000899412
down	CG9444	FBgn0037730	-3.36854	0.00105547
down	asRNA:CR43637	FBgn0263628	-3.36621	0.000732423
down	psh	FBgn0030926	-3.35005	0.014674
down	Syt1	FBgn0004242	-3.24338	0.0103218
down	CG3348	FBgn0040609	-3.03616	0.0442119
down	CG13796	FBgn0031939	-2.9828	0.0233477
down	PGRP-LB	FBgn0037906	-2.91514	0.0246646
down	SPH93	FBgn0032638	-2.88809	0.031817
down	Root	FBgn0039152	-2.81948	1.94285e-05
down	CG4269	FBgn0034741	-2.75934	0.00636984
down	bdl	FBgn0028482	-2.73787	0.0329255
down	CG14855	FBgn0038260	-2.72913	0.000251516
down	Tret1-1	FBgn0050035	-2.69964	0.0011002
down	Thor	FBgn0261560	-2.50602	0.00468837
down	CG32647	FBgn0052647	-2.48643	7.30617e-05
down	Lst	FBgn0034140	-2.37233	0.0214183
down	CARPB	FBgn0052698	-2.29367	0.031817
down	CG13868	FBgn0034501	-2.01367	0.00660061
down	Cad96Ca	FBgn0022800	-1.93004	2.69087e-06
down	Mct1	FBgn0023549	-1.82347	0.0250068
down	CG3829	FBgn0035091	-1.74518	0.0117848
down	IFT54	FBgn0038221	-1.70876	0.000156726
down	Fatp3	FBgn0034999	-1.62212	0.00561328
down	Mal-A5	FBgn0050359	-1.62121	0.0246646
down	CG17224	FBgn0031489	-1.54191	0.0124177
down	Sgsh	FBgn0038660	-1.27638	2.454e-11
down	Tsp42Ej	FBgn0033132	-1.19371	0.0298941
down	pug	FBgn0020385	-0.929421	0.00105547
down	CG11089	FBgn0039241	-0.782201	0.00168304

## Sheet: B.DEGs_D907_NA
Extended Data Table 2B | Differentially Expressed Genes in D907 non-assimilated selection line in wing discs (WD) and pupal wings (PW). (cut-off: padj<0.05 and |log2(FC)|>=0.58)
Wing disc							Pupal wing
Type	Symbol	GENEID	log2FC_WD_D907_NA	padjust_WD_D907_NA	Comment		Type	Symbol	GENEID	log2FC_PW_D907_NA	padjust_PW_D907_NA	Comment
up	CG6026	FBgn0038676	1.11996	0.0356586			up	Idgf5	FBgn0064237	25.5014	6.17338e-05
down	CG15025	FBgn0038709	-8.42803	0.00584453			up	wcd	FBgn0262560	0.62156	0.014191
down	CG7231	FBgn0031968	-2.18583	3.19701e-05			down	CG14855	FBgn0038260	-3.0625	6.81811e-07
down	Cad96Ca	FBgn0022800	-1.67611	0.000304213			down	CG2225	FBgn0032957	-0.663754	0.000371172
down	Sgsh	FBgn0038660	-1.25044	9.7227e-11			down	CG14860	FBgn0038273	-0.649756	0.0148983
							down	Hsp83	FBgn0001233	-0.788877	0.552647	Confirmed downregulation by RT-qPCR, Extended Data Fig.7b

## Sheet: C.DESEQ2_WD_D907_A_vs_C
Extended Data Table 2C | Differential expression analysis (DESeq2) in D907 assimilated vs control in wing disc.
GENEID	Symbol	log2BaseMean	log2FC	Stderr_log2FC	pvalue	padjust
FBgn0000008	a	12.5082	-0.0272505	0.208837	0.896181	1
FBgn0000014	abd-A	3.54541	-3.27693	1.24842	0.00866822	0.43673
FBgn0000015	Abd-B	0.161474	-1.69413	2.35655	0.472201	1
FBgn0000017	Abl	11.4852	-0.0561127	0.232432	0.809233	1
FBgn0000018	abo	8.16282	0.0866606	0.29284	0.767282	1
FBgn0000022	ac	8.1733	0.0767586	0.582776	0.895212	1
FBgn0000024	Ace	4.50888	0.214895	0.650823	0.741257	1
FBgn0000028	acj6	2.16252	-3.438	1.29143	0.00776416	0.412129
FBgn0000032	Acph-1	8.98686	-0.0162993	0.344901	0.962308	1
FBgn0000036	nAChRalpha1	2.0714	-3.61611	1.04667	0.000550523	0.0644527
FBgn0000037	mAChR-A	3.06774	0.0101989	1.10989	0.992668	1
FBgn0000038	nAChRbeta1	0.270634	-2.74885	1.92333	0.152944	1
FBgn0000039	nAChRalpha2	0.514662	-2.0159	2.52326	0.424333	1
FBgn0000042	Act5C	16.1769	0.0154546	0.126292	0.902604	1
FBgn0000043	Act42A	14.7455	0.0231319	0.20822	0.911542	1
FBgn0000044	Act57B	8.56161	0.477985	0.521719	0.359576	1
FBgn0000045	Act79B	2.91455	-1.42452	1.67712	0.395667	1
FBgn0000046	Act87E	9.12651	0.215159	0.517605	0.677642	1
FBgn0000047	Act88F	7.48719	2.48689	1.36258	0.0679808	1
FBgn0000052	Pfas	10.7093	-0.0914132	0.154468	0.553989	1
FBgn0000053	Gart	10.7954	-0.300843	0.225449	0.182067	1
FBgn0000055	Adh	-1.43097	-3.45068	5.12559	0.500803	NA
FBgn0000057	adp	9.38864	0.0294831	0.147489	0.841558	1
FBgn0000061	al	10.5103	-0.0114437	0.281209	0.96754	1
FBgn0000063	Mps1	8.067	0.114993	0.290825	0.692546	1
FBgn0000064	Ald1	12.216	-0.258971	0.2986	0.385787	1
FBgn0000071	Ama	11.4544	-0.0163899	0.221028	0.940889	1
FBgn0000075	amd	8.86571	-0.0972106	0.205702	0.636513	1
FBgn0000077	amx	7.46143	-0.0555412	0.314162	0.859672	1
FBgn0000078	Amy-d	0.235729	0.542534	2.06263	0.792527	1
FBgn0000079	Amy-p	0.223185	2.34575	1.73594	0.176604	1
FBgn0000083	AnxB9	12.028	0.147321	0.187278	0.43149	1
FBgn0000084	AnxB10	8.22781	-0.387492	0.311909	0.214117	1
FBgn0000092	dyw	3.96892	-0.0331524	0.481865	0.945149	1
FBgn0000097	aop	11.9838	-0.0347138	0.232434	0.881278	1
FBgn0000100	RpLP0	15.4776	-0.0161303	0.248327	0.948209	1
FBgn0000108	Appl	9.49263	0.166379	0.31113	0.592819	1
FBgn0000109	Aprt	7.92934	0.127908	0.544403	0.814247	1
FBgn0000114	bru1	6.61006	-1.73585	0.636283	0.00636976	0.357494
FBgn0000115	Arl1	10.1262	-0.00360323	0.093534	0.969271	1
FBgn0000116	Argk	13.4026	-0.0904764	0.227752	0.691178	1
FBgn0000117	arm	14.6646	0.0304654	0.133545	0.819547	1
FBgn0000119	arr	12.3442	0.0659215	0.156217	0.673035	1
FBgn0000120	Arr1	-1.16408	0.968259	2.75422	0.725172	NA
FBgn0000121	Arr2	4.10363	-0.265082	0.29662	0.371495	1
FBgn0000137	ase	4.17788	-0.300132	0.730875	0.681332	1
FBgn0000139	ash2	9.72679	0.0930044	0.22059	0.673305	1
FBgn0000140	asp	9.90051	0.13639	0.250121	0.58555	1
FBgn0000146	aub	3.32083	0.331983	0.517231	0.520973	1
FBgn0000147	aurA	8.68677	0.187929	0.228701	0.411236	1
FBgn0000150	awd	14.514	0.0526299	0.348815	0.880069	1
FBgn0000152	Axs	9.11858	-0.047944	0.334594	0.886061	1
FBgn0000153	b	4.35572	-0.642005	0.723544	0.374914	1
FBgn0000157	Dll	11.0699	0.0205704	0.322358	0.94912	1
FBgn0000158	bam	2.79957	1.30939	0.66768	0.0498674	1
FBgn0000163	baz	11.0637	-0.0401969	0.218547	0.85407	1
FBgn0000173	ben	12.0376	0.0277953	0.0484337	0.566046	1
FBgn0000179	bi	11.1907	0.140918	0.315206	0.654827	1
FBgn0000180	bib	10.0409	-0.155568	0.316458	0.62301	1
FBgn0000181	bic	14.2884	0.0112996	0.232613	0.961257	1
FBgn0000183	BicD	11.2121	-0.0624266	0.176903	0.724174	1
FBgn0000206	boss	5.24447	-2.87417	1.18489	0.0152793	0.606533
FBgn0000212	brm	12.4185	0.0788947	0.136871	0.564334	1
FBgn0000216	Brd	6.98789	0.222861	0.217624	0.305806	1
FBgn0000221	brn	7.72859	-0.100199	0.210045	0.633336	1
FBgn0000228	Bsg25D	10.0976	-0.0208014	0.158554	0.895621	1
FBgn0000229	bsk	9.60373	0.0180301	0.983472	0.985373	1
FBgn0000233	btd	4.62465	-1.8036	0.979593	0.0655958	1
FBgn0000239	bur	10.8472	-0.0114922	0.34724	0.973598	1
FBgn0000241	bw	1.20565	-0.876228	0.964045	0.363399	1
FBgn0000244	by	9.18267	0.0796091	0.17874	0.656037	1
FBgn0000246	c(3)G	6.7144	0.185795	0.661957	0.778959	1
FBgn0000247	ca	10.5521	0.0256018	0.183427	0.888996	1
FBgn0000250	cact	11.2922	-0.0198511	0.169887	0.90698	1
FBgn0000251	cad	-1.16213	-1.94788	3.22417	0.545745	NA
FBgn0000253	Cam	13.2495	0.121862	0.244474	0.618154	1
FBgn0000256	capu	11.4909	-0.0485522	0.203172	0.811128	1
FBgn0000257	car	8.91041	0.0576127	0.258719	0.823781	1
FBgn0000259	CkIIbeta	11.4756	0.0410013	0.310924	0.895088	1
FBgn0000261	Cat	14.2116	-0.196282	0.286663	0.493525	1
FBgn0000273	Pka-C1	10.9166	0.0708879	0.257015	0.782692	1
FBgn0000276	CecA1	-1.12268	0.74195	2.65942	0.780253	NA
FBgn0000278	CecB	-0.92001	-0.700737	3.73666	0.851245	NA
FBgn0000279	CecC	0.484249	0	2.02099	1	1
FBgn0000283	Cp190	11.7955	0.101777	0.198452	0.608052	1
FBgn0000286	Cf2	9.43236	-0.0729897	0.300459	0.808062	1
FBgn0000287	salr	11.536	0.0753438	0.146296	0.606547	1
FBgn0000289	cg	12.4473	0.0508024	0.110683	0.64624	1
FBgn0000299	Col4a1	10.9813	-0.0824367	0.365445	0.821529	1
FBgn0000303	ChAT	1.51051	1.00817	1.07444	0.348079	1
FBgn0000307	chif	10.9703	0.0182417	0.325701	0.955336	1
FBgn0000308	chic	14.3064	-0.00838716	0.284838	0.976509	1
FBgn0000316	cin	10.058	-0.198169	0.729271	0.785825	1
FBgn0000317	ck	11.6734	-0.0196208	0.291503	0.946336	1
FBgn0000318	cl	11.0586	0.00712647	0.145862	0.961033	1
FBgn0000319	Chc	13.6819	-0.0283124	0.176592	0.872624	1
FBgn0000320	eya	8.04145	0.0220084	0.551265	0.968154	1
FBgn0000326	clt	8.55744	-0.0547268	0.355019	0.87749	1
FBgn0000330	cm	9.97901	-0.00320611	0.294371	0.99131	1
FBgn0000337	cn	0.268373	-1.41247	2.46947	0.56734	1
FBgn0000339	cni	9.33396	0.035773	1.05688	0.972999	1
FBgn0000346	comt	7.87932	0.235636	0.190694	0.216579	1
FBgn0000351	cort	6.22092	0.111819	0.225305	0.619682	1
FBgn0000352	cos	10.664	-0.0119328	0.123192	0.922835	1
FBgn0000357	Cp18	2.26944	-0.721398	0.777049	0.35321	1
FBgn0000359	Cp36	-1.09841	-3.0697	3.84028	0.424091	NA
FBgn0000370	crc	11.8562	-0.0836529	0.920003	0.927551	1
FBgn0000376	crm	9.59012	0.136651	0.17903	0.445294	1
FBgn0000377	crn	10.1282	-0.061803	0.114591	0.589657	1
FBgn0000382	csw	10.8077	-0.0343513	0.316284	0.913513	1
FBgn0000384	cta	9.56275	-0.00814574	0.17676	0.963244	1
FBgn0000394	cv	10.5618	0.0449463	0.160256	0.77912	1
FBgn0000395	cv-2	10.5947	-0.0697794	0.264064	0.791586	1
FBgn0000404	CycA	11.6284	0.099307	0.352611	0.778225	1
FBgn0000405	CycB	11.6259	0.0816301	0.115797	0.480845	1
FBgn0000406	Cyt-b5-r	5.2982	-3.24743	2.03023	0.109702	1
FBgn0000411	D	1.5355	-0.74867	1.41086	0.595664	1
FBgn0000412	D1	13.5891	0.0900313	0.256812	0.725909	1
FBgn0000414	Dab	11.1883	0.0618832	0.18383	0.736394	1
FBgn0000416	Sap-r	13.1179	-0.126928	0.181981	0.485503	1
FBgn0000422	Ddc	4.37445	0.304383	0.591986	0.607132	1
FBgn0000426	SmF	10.3072	0.0729101	0.354697	0.837138	1
FBgn0000439	Dfd	1.0971	0	2.60002	1	1
FBgn0000442	Pkg21D	4.56965	-1.28914	1.46778	0.379785	1
FBgn0000447	Dhod	10.7814	-0.0973215	0.0992099	0.32661	1
FBgn0000448	Hr3	4.10494	0.0607926	1.69603	0.971407	1
FBgn0000449	dib	3.05652	0.141228	0.843983	0.867106	1
FBgn0000451	ect	9.95842	0.0144336	0.369399	0.968832	1
FBgn0000454	Dip-B	11.6758	-0.245487	0.309952	0.428352	1
FBgn0000455	Dip-C	9.61828	-0.101244	0.130707	0.438582	1
FBgn0000459	disco	7.46986	-0.109634	0.308796	0.722561	1
FBgn0000463	Dl	11.501	-0.0919097	0.207269	0.657453	1
FBgn0000464	Lar	7.2388	0.195063	0.296983	0.5113	1
FBgn0000473	Cyp6a2	4.53412	-2.78016	1.32162	0.0354132	0.978625
FBgn0000477	DNaseII	5.02373	-4.06686	1.39861	0.00363996	0.238881
FBgn0000479	dnc	9.6958	0.0454527	0.293407	0.876889	1
FBgn0000482	dor	9.87823	0.0147407	0.134045	0.912435	1
FBgn0000489	Pka-C3	8.22442	-0.257381	0.491714	0.60067	1
FBgn0000490	dpp	10.6253	-0.00187045	0.251631	0.994069	1
FBgn0000492	Dr	11.2215	0.0556606	0.266153	0.834347	1
FBgn0000499	dsh	10.6754	-0.0105912	0.153192	0.944881	1
FBgn0000500	Dsk	3.99865	0	1.7683	1	1
FBgn0000504	dsx	10.1355	-0.059976	0.250613	0.81086	1
FBgn0000520	dwg	9.44223	0.0640867	0.250939	0.798424	1
FBgn0000524	dx	11.5684	0.0140763	0.18829	0.940407	1
FBgn0000527	e	8.53797	-2.54582	0.881269	0.00386703	0.25062
FBgn0000533	ea	8.27345	0.246063	0.348732	0.480441	1
FBgn0000535	eag	1.29961	-1.30494	1.52089	0.390887	1
FBgn0000536	eas	9.98281	0.0571329	0.321068	0.858765	1
FBgn0000541	E(bx)	12.0664	0.0794692	0.415821	0.848436	1
FBgn0000542	ec	13.2154	0.0507331	0.199535	0.799298	1
FBgn0000543	ecd	10.3592	-0.028289	0.146218	0.84659	1
FBgn0000546	EcR	11.3825	0.0711915	0.222961	0.749499	1
FBgn0000547	ed	14.1759	0.0263598	0.122419	0.829514	1
FBgn0000551	Edg78E	3.49525	0.399568	0.978345	0.682971	1
FBgn0000552	Edg84A	-0.343901	0	2.95722	1	NA
FBgn0000557	eEF1alpha2	10.7252	-0.576776	0.696033	0.407296	1
FBgn0000559	eEF2	16.624	0.0019906	0.14898	0.989339	1
FBgn0000560	eg	7.91871	0.51629	0.340992	0.130005	1
FBgn0000562	egl	11.2869	0.00509148	0.180859	0.977541	1
FBgn0000565	MsrA	10.4064	-0.0448142	0.152602	0.769012	1
FBgn0000566	Eip55E	10.2507	-0.125264	0.187509	0.504108	1
FBgn0000567	Eip74EF	12.0442	0.000718131	0.410029	0.998603	1
FBgn0000568	Eip75B	12.8693	-0.378833	0.348503	0.277025	1
FBgn0000575	emc	12.771	0.0465834	0.412762	NA	NA
FBgn0000576	ems	9.84845	0.0239058	0.262217	0.927359	1
FBgn0000577	en	10.8604	-0.109069	0.24843	0.660637	1
FBgn0000578	ena	12.9678	-0.0560433	0.225241	0.803504	1
FBgn0000579	Eno	13.0769	-0.0212822	0.280789	0.939583	1
FBgn0000581	E(Pc)	11.8884	0.0271704	0.238554	0.90932	1
FBgn0000588	esc	7.87526	0.120884	0.386344	0.754362	1
FBgn0000591	E(spl)m8-HLH	7.70229	-0.321559	0.427208	0.45163	1
FBgn0000592	Est-6	1.75108	-5.96681	2.17324	NA	NA
FBgn0000594	Est-P	3.72561	2.57597	1.00337	0.0102492	0.478058
FBgn0000611	exd	12.3551	0.0337113	0.212333	0.873853	1
FBgn0000615	exu	4.00786	0.0646636	0.339306	0.848858	1
FBgn0000617	e(y)1	9.49911	0.0891874	0.284233	0.753686	1
FBgn0000618	e(y)2	8.7349	0.0278376	0.307	0.92775	1
FBgn0000625	eyg	9.13554	-0.122416	0.336401	0.715934	1
FBgn0000629	E(z)	9.78433	0.114332	0.336643	0.734139	1
FBgn0000633	CG17716	4.11325	-2.66228	1.01859	0.00895672	0.443276
FBgn0000635	Fas2	12.324	0.000595502	0.134086	0.996456	1
FBgn0000636	Fas3	13.4312	0.13354	0.125281	0.28646	1
FBgn0000639	Fbp1	12.8779	-4.79329	1.00867	2.01311e-06	0.00104375
FBgn0000640	Fbp2	11.2776	-4.27218	1.28156	0.000857354	0.085641
FBgn0000644	Fcp3C	6.28488	0.473731	0.538369	0.378893	1
FBgn0000658	fj	12.3458	0.047474	0.168239	0.777804	1
FBgn0000659	fkh	3.7818	-1.69734	1.50228	0.258544	1
FBgn0000662	fl(2)d	11.3682	0.00949031	0.179577	0.957853	1
FBgn0000667	Actn	12.0811	0.0483059	0.214646	0.821941	1
FBgn0000709	fliI	10.1841	-0.102407	0.188657	0.587254	1
FBgn0000711	flw	10.3497	0.00447509	0.133073	0.973173	1
FBgn0000719	fog	9.0511	-0.186576	0.317662	0.556975	1
FBgn0000721	for	11.0094	-0.0381918	0.147419	0.795581	1
FBgn0000723	FER	11.4746	0.187416	0.267437	0.483437	1
FBgn0000808	gd	0.594464	3.37006	1.64641	0.0406666	1
FBgn0000810	fs(1)K10	9.53715	-0.0200493	0.0777515	0.796512	1
FBgn0000826	png	4.02019	0.483468	0.458692	0.291877	1
FBgn0000927	fs(1)Ya	2.79337	-0.700741	1.52613	0.646118	1
FBgn0000928	fs(1)Yb	3.3155	1.0033	0.592393	0.0903327	1
FBgn0000996	dup	9.71467	0.221634	0.174357	0.203674	1
FBgn0001075	ft	13.0076	0.0399551	0.275206	0.884567	1
FBgn0001078	ftz-f1	7.29306	0.404666	0.664562	0.542576	1
FBgn0001079	fu	9.60463	0.0324238	0.139107	0.815696	1
FBgn0001083	fw	10.5026	-0.149792	0.18221	0.411029	1
FBgn0001084	fy	9.29983	-0.00717236	0.288733	0.980182	1
FBgn0001085	fz	11.3015	-0.056943	0.231891	0.806024	1
FBgn0001086	fzy	10.3743	0.0642347	0.463797	0.889847	1
FBgn0001087	g	10.854	-0.0433844	0.132414	0.743182	1
FBgn0001089	Gal	10.1306	-0.2962	0.755415	0.694982	1
FBgn0001090	bnb	19.6371	0.385727	0.422448	0.361203	1
FBgn0001091	Gapdh1	11.9762	-0.0507559	0.24071	0.832997	1
FBgn0001092	Gapdh2	12.9744	0.0725135	0.147758	0.623597	1
FBgn0001098	Gdh	12.6996	0.0140231	0.273986	0.959181	1
FBgn0001099	gdl	4.27269	0.302884	0.480302	0.528294	1
FBgn0001104	Galphai	11.8348	0.0337249	0.245186	0.890598	1
FBgn0001105	Gbeta13F	12.4649	-0.0238102	0.248623	0.923704	1
FBgn0001108	DCTN1-p150	10.96	-0.0365165	0.148829	0.806178	1
FBgn0001112	Gld	9.16421	0.0413954	0.342626	0.903835	1
FBgn0001114	Glt	11.5477	-0.373202	0.321709	0.246024	1
FBgn0001120	gnu	-0.741383	0.00200171	1.99751	0.9992	NA
FBgn0001122	Galphao	9.69085	0.0650397	0.242059	0.788166	1
FBgn0001123	Galphas	11.1289	0.0859183	0.241695	0.722228	1
FBgn0001124	Got1	11.2117	-0.0490705	0.345678	0.887116	1
FBgn0001125	Got2	10.8879	-0.0908851	0.184034	0.621412	1
FBgn0001128	Gpdh1	8.53752	0.0021909	0.149307	0.988292	1
FBgn0001133	grau	9.06305	0.0258683	0.267946	0.923089	1
FBgn0001134	Grd	0.501322	0.0476961	1.41481	0.973107	1
FBgn0001137	grk	3.80696	-0.106949	0.536421	0.84197	1
FBgn0001138	grn	10.7993	0.111507	0.349643	0.749789	1
FBgn0001139	gro	12.3221	0.0840044	0.208085	0.686432	1
FBgn0001142	Gs1	9.40105	-1.45242	0.713035	0.0416543	1
FBgn0001145	Gs2	7.32335	-0.073326	0.328115	0.823165	1
FBgn0001147	gsb-n	2.41312	-1.47348	1.33158	0.268482	1
FBgn0001148	gsb	2.24677	-3.61748	1.69454	0.032778	0.938093
FBgn0001149	GstD1	14.1395	-0.0517586	0.265371	0.84536	1
FBgn0001150	gt	5.42354	-0.225289	0.303238	0.457514	1
FBgn0001168	h	9.45798	-0.0301312	0.285567	0.915968	1
FBgn0001169	H	11.3279	-0.0100198	0.276272	0.971069	1
FBgn0001170	H2.0	4.99778	-0.0397366	0.641296	0.950592	1
FBgn0001174	halo	-0.290952	-0.538154	2.25474	0.811356	NA
FBgn0001179	hay	9.24287	0.0880966	0.144119	0.541016	1
FBgn0001180	hb	2.08171	-0.588504	1.77283	0.739922	1
FBgn0001185	her	9.1758	0.0908694	0.272633	0.738906	1
FBgn0001186	Hex-A	10.5408	-0.0478276	0.117679	0.684432	1
FBgn0001187	Hex-C	-0.00814323	-1.3177	1.89443	0.486702	1
FBgn0001189	hfw	10.3723	0.0105981	0.177499	0.952388	1
FBgn0001197	His2Av	12.7412	0.106933	0.180458	0.553474	1
FBgn0001202	hook	9.70643	-0.0251398	0.139154	0.856633	1
FBgn0001206	Hmr	9.43568	0.0427557	0.234234	0.855164	1
FBgn0001208	Hn	7.07876	-3.46581	0.881812	8.48304e-05	0.0151415
FBgn0001215	Hrb98DE	13.2374	0.121808	0.0679659	0.0731029	1
FBgn0001216	Hsc70-1	1.14731	1.78873	1.16311	0.124077	1
FBgn0001217	Hsc70-2	2.20603	1.44632	1.61499	0.370491	1
FBgn0001218	Hsc70-3	14.7337	-0.00938528	0.28187	0.973438	1
FBgn0001220	Hsc70-5	11.6742	0.00408364	0.133235	0.975549	1
FBgn0001222	Hsf	10.7147	0.0110285	0.318227	0.972354	1
FBgn0001224	Hsp23	15.393	-0.181143	0.265772	0.495509	1
FBgn0001225	Hsp26	12.7386	-0.849636	0.520651	0.102706	1
FBgn0001226	Hsp27	15.9923	-0.139763	0.335069	0.676593	1
FBgn0001227	Hsp67Ba	13.4332	-0.145645	0.241292	0.546108	1
FBgn0001228	CG4456	1.05183	0	2.04372	1	1
FBgn0001229	Hsp67Bc	6.67145	-1.34761	0.828514	0.103834	1
FBgn0001230	Hsp68	8.19001	-1.46204	0.762261	0.0551074	1
FBgn0001233	Hsp83	14.7407	0.0585431	0.232168	0.800918	1
FBgn0001234	lncRNA:Hsromega	10.4432	-0.315921	0.481527	0.511772	1
FBgn0001235	hth	12.4616	-0.0369237	0.310967	0.905483	1
FBgn0001247	Ide	10.3409	0.0627967	0.449149	0.888808	1
FBgn0001248	Idh	13.387	0.0117328	0.0927578	0.899345	1
FBgn0001250	if	11.3236	-0.0741675	0.219593	0.735552	1
FBgn0001253	ImpE1	11.8999	-0.281978	0.684826	0.680521	1
FBgn0001254	ImpE2	17.6025	-0.287378	0.592439	0.627622	1
FBgn0001255	ImpE3	10.2702	-0.347853	0.623675	0.577017	1
FBgn0001256	ImpL1	10.5067	-0.0480143	0.682907	0.943948	1
FBgn0001257	ImpL2	7.78052	0.0814783	0.806183	NA	NA
FBgn0001258	Ldh	7.30256	-0.135046	0.504831	0.789079	1
FBgn0001259	in	10.3767	0.0783847	0.154314	0.611484	1
FBgn0001263	inaD	4.7339	-0.328063	0.2486	0.186954	1
FBgn0001269	inv	11.0263	-0.00328176	0.206354	0.987311	1
FBgn0001276	ix	8.59441	-0.145313	0.366473	0.691722	1
FBgn0001280	janA	10.5886	-0.0886346	0.306294	0.772292	1
FBgn0001281	janB	-0.563137	0.202751	1.98454	0.918626	NA
FBgn0001285	Jon44E	-0.932772	0.918168	3.74326	0.806235	NA
FBgn0001291	Jra	10.0339	-0.0236967	0.205418	0.908161	1
FBgn0001296	kar	9.18239	-0.144189	0.260858	0.580435	1
FBgn0001297	kay	10.5246	-0.104783	0.340365	0.758192	1
FBgn0001301	kel	10.8104	-0.00535525	0.117554	0.963664	1
FBgn0001308	Khc	12.3588	0.0167856	0.114595	0.883544	1
FBgn0001311	kkv	13.2338	-0.0489366	0.169174	0.772377	1
FBgn0001316	klar	13.9596	0.00541971	0.180801	0.976086	1
FBgn0001319	kn	10.6356	-0.0421416	0.262086	0.872257	1
FBgn0001320	kni	9.15559	-0.00533638	0.329381	0.987074	1
FBgn0001321	knk	10.2105	0.112788	0.535089	0.833056	1
FBgn0001323	knrl	8.21454	0.0345733	0.302633	0.909046	1
FBgn0001324	kto	11.5518	0.0241382	0.231657	0.917012	1
FBgn0001325	Kr	3.10068	-4.11297	1.35614	0.00242245	0.178214
FBgn0001330	kz	8.82968	0.0340882	0.363665	0.92532	1
FBgn0001341	Mybbp1A	9.79443	-0.0275873	0.199144	0.889822	1
FBgn0001404	egh	9.59484	0.0845164	0.178507	0.635884	1
FBgn0001491	l(1)10Bb	9.26891	0.104032	0.211154	0.622237	1
FBgn0001565	Hlc	10.5993	-0.00431593	0.249509	0.986199	1
FBgn0001612	Grip91	9.36058	0.0305411	0.45662	0.946673	1
FBgn0001624	dlg1	11.5425	-0.0522482	0.113237	0.644507	1
FBgn0001941	ifc	9.5039	-0.0743989	0.0889245	0.402788	1
FBgn0001942	eIF4A	15.5877	-0.0360674	0.168646	0.830653	1
FBgn0001961	Arpc1	11.275	0.00815857	0.190355	0.965813	1
FBgn0001965	Sos	11.016	-0.0148374	0.205916	0.942558	1
FBgn0001967	NimC3	8.51843	-0.461153	0.647579	0.476391	1
FBgn0001970	Pgant35A	10.0091	-0.080604	0.252004	0.74908	1
FBgn0001977	CIAPIN1	10.2698	-0.0141965	0.224669	0.949616	1
FBgn0001978	stc	10.9181	0.00942221	0.174924	0.957043	1
FBgn0001981	esg	9.75652	0.184476	0.16086	0.25146	1
FBgn0001983	wor	1.53798	0.324245	0.755809	0.66792	1
FBgn0001986	Mtr4	9.92313	-0.0365191	0.272473	0.89338	1
FBgn0001987	Gli	12.1422	-0.0802851	0.214333	0.707973	1
FBgn0001989	ND-B17	10.5112	0.0238884	0.397414	0.952068	1
FBgn0001990	wek	8.45206	0.0994153	0.248925	0.689615	1
FBgn0001991	Ca-alpha1D	3.71858	-0.0637279	0.697093	0.927159	1
FBgn0001992	Cyp303a1	2.31698	-0.0739037	0.551185	0.893338	1
FBgn0001994	crp	12.0417	0.0965588	0.131527	0.462867	1
FBgn0001995	mRpL4	9.07588	0.0405399	0.319876	0.899149	1
FBgn0002021	l(2)37Bb	8.45923	0.189674	0.51808	0.714284	1
FBgn0002022	Catsup	11.1559	-0.0461029	0.109321	0.673228	1
FBgn0002023	Lim3	0.0291261	-0.700741	1.97065	0.722149	1
FBgn0002031	l(2)37Cc	11.5317	0.0158177	0.194763	0.935271	1
FBgn0002036	CG10561	6.79333	-0.00850721	0.188592	0.96402	1
FBgn0002044	swm	11.3503	-0.0329605	0.197352	0.867359	1
FBgn0002069	AspRS	11.9113	-0.0157676	0.247326	0.949167	1
FBgn0002121	l(2)gl	11.6555	-0.0168808	0.449963	0.970074	1
FBgn0002174	CG5504	10.3957	-0.0768722	0.371177	0.835929	1
FBgn0002183	dre4	12.1584	0.130971	0.177221	0.45989	1
FBgn0002283	l(3)73Ah	9.38592	-0.0181051	0.170378	0.915373	1
FBgn0002284	Prosbeta6	11.3948	-0.0571807	0.216258	0.791465	1
FBgn0002306	sas	12.7305	0.0668843	0.135738	0.622191	1
FBgn0002354	l(3)87Df	6.1042	-0.335645	0.335452	0.317032	1
FBgn0002413	dco	12.0235	0.0206789	0.160132	0.89725	1
FBgn0002431	hyd	12.1602	0.0721626	0.254848	0.777055	1
FBgn0002440	l(3)mbn	0.165111	1.31302	4.12144	0.750043	1
FBgn0002441	l(3)mbt	10.3238	0.0577938	0.158433	0.715273	1
FBgn0002466	sti	10.6544	0.113567	0.348302	0.744379	1
FBgn0002521	pho	10.1908	-0.00949541	0.790359	NA	NA
FBgn0002522	lab	2.09067	0.648008	1.15719	0.575491	1
FBgn0002524	lace	9.60295	0.0571626	0.113473	0.614432	1
FBgn0002525	Lam	13.5119	0.0400635	0.223069	0.857465	1
FBgn0002526	LanA	12.3348	0.0756696	0.349734	0.828704	1
FBgn0002531	Lcp1	7.31907	0.320605	1.41213	0.820395	1
FBgn0002533	Lcp2	5.92506	0.039686	0.94173	0.966386	1
FBgn0002534	Lcp3	4.97161	-0.314187	1.90975	0.869324	1
FBgn0002535	Lcp4	7.11714	-0.310375	1.40907	0.825661	1
FBgn0002542	lds	10.4215	0.0382488	0.301944	0.899198	1
FBgn0002543	robo2	12.607	0.040492	0.295894	0.891153	1
FBgn0002552	lin	10.3607	-0.0887652	0.166664	0.59431	1
FBgn0002561	l(1)sc	0.489257	-0.0981174	1.16968	0.933149	1
FBgn0002562	Lsp1alpha	12.1246	-4.12713	1.73605	0.0174395	0.652512
FBgn0002563	Lsp1beta	12.6398	-4.38263	1.41817	0.00199931	0.154387
FBgn0002564	Lsp1gamma	12.4085	-3.63982	1.63684	0.0261692	0.81642
FBgn0002565	Lsp2	12.2479	-4.29002	1.31128	0.00106933	0.0995118
FBgn0002566	lt	9.90406	-0.0121048	0.822057	NA	NA
FBgn0002567	Rab32	8.1688	-0.511863	0.280619	0.0681445	1
FBgn0002569	Mal-A2	0.3007	0	5.12175	1	1
FBgn0002573	sens	6.25471	-0.25892	0.46677	0.579096	1
FBgn0002576	lz	1.62061	0.225188	1.14317	0.843839	1
FBgn0002577	m	11.1126	-0.533564	0.79968	0.50463	1
FBgn0002578	Kaz-m1	-0.580555	1.6145	2.4684	0.513069	NA
FBgn0002579	RpL36	14.7502	-0.0738315	0.145334	0.611443	1
FBgn0002590	RpS5a	15.5798	-0.0118227	0.198366	0.952474	1
FBgn0002592	E(spl)m2-BFM	9.6288	-0.252485	0.411496	0.539494	1
FBgn0002593	RpLP1	15.4371	-0.025463	0.330575	0.938603	1
FBgn0002609	E(spl)m3-HLH	9.74452	-0.370028	0.147783	0.0122845	0.530767
FBgn0002622	RpS3	15.3416	-0.0123643	0.210946	0.95326	1
FBgn0002626	RpL32	14.8756	-0.138924	0.280984	0.62101	1
FBgn0002629	E(spl)m4-BFM	8.05358	0.0103064	0.214115	0.961609	1
FBgn0002631	E(spl)m5-HLH	3.52943	0.463901	0.413005	0.261338	1
FBgn0002632	E(spl)m6-BFM	7.23778	-0.135174	0.662315	0.83828	1
FBgn0002633	E(spl)m7-HLH	8.99438	-0.246252	0.273821	0.368485	1
FBgn0002638	Rcc1	11.0973	0.159009	0.202859	0.433135	1
FBgn0002641	mal	8.66394	-0.0806599	0.176129	0.646982	1
FBgn0002643	mam	12.5278	-0.156675	0.360424	0.663783	1
FBgn0002645	Map205	12.2799	-0.00205467	0.245317	0.993317	1
FBgn0002673	twe	5.93093	0.219455	0.299942	0.464377	1
FBgn0002707	mei-9	8.77526	0.0183614	0.194143	0.924651	1
FBgn0002709	mei-218	4.82681	0.021465	0.264541	0.93533	1
FBgn0002715	mei-S332	7.97826	0.199884	0.159608	0.210445	1
FBgn0002716	mei-W68	3.36953	-0.355094	0.541244	0.511779	1
FBgn0002719	Men	10.2455	-0.15243	0.233895	0.514592	1
FBgn0002723	Met	8.6996	0.0227268	0.240105	0.92459	1
FBgn0002732	E(spl)malpha-BFM	10.3077	-0.228013	0.281652	0.418196	1
FBgn0002733	E(spl)mbeta-HLH	11.3702	-0.179149	0.228106	0.432234	1
FBgn0002734	E(spl)mdelta-HLH	8.35655	-0.252422	0.140853	0.0731171	1
FBgn0002735	E(spl)mgamma-HLH	5.90418	0.189131	0.175489	0.281152	1
FBgn0002736	mago	10.3373	0.11975	0.352289	0.733917	1
FBgn0002772	Mlc1	5.13657	1.51228	1.05503	0.151745	1
FBgn0002773	Mlc2	6.9856	0.377103	0.694571	0.587178	1
FBgn0002774	mle	11.2188	0.0880613	0.261159	0.735971	1
FBgn0002775	msl-3	9.06412	0.153796	0.116453	0.186613	1
FBgn0002778	mnd	9.11977	-0.0578522	0.196208	0.768108	1
FBgn0002780	mod	12.5464	-0.0211261	0.736768	0.977125	1
FBgn0002781	mod(mdg4)	13.2347	0.054969	0.24794	0.824545	1
FBgn0002783	mor	12.5508	0.0412137	0.122013	0.735528	1
FBgn0002787	Rpn8	11.5013	0.0281869	0.156236	0.856829	1
FBgn0002789	Mp20	4.31771	1.7993	0.971378	0.0639804	1
FBgn0002791	mr	9.44752	0.0283584	0.453822	0.950174	1
FBgn0002838	ms(3)K81	-0.700574	-0.942562	2.71555	0.728518	NA
FBgn0002862	Mst87F	0.222351	-0.996756	1.58673	0.529884	1
FBgn0002863	Acp95EF	1.98453	0.393496	1.20608	0.744228	1
FBgn0002868	MtnA	6.35068	0.722742	0.921541	0.432879	1
FBgn0002869	MtnB	6.71781	1.98078	2.50629	NA	NA
FBgn0002872	mu2	9.3109	0.179009	0.339315	0.597805	1
FBgn0002873	mud	10.164	0.102699	0.232188	0.658266	1
FBgn0002878	mus101	8.70763	0.0704403	0.171359	0.681022	1
FBgn0002887	mus201	8.41714	0.00632509	0.196897	0.974373	1
FBgn0002891	DNApol-zeta	7.63889	-0.127385	0.27786	0.646628	1
FBgn0002899	mus301	7.98611	0.0817002	0.250885	0.744691	1
FBgn0002901	mus304	7.76572	0.0800737	0.366744	0.827167	1
FBgn0002905	DNApol-theta	8.70796	0.0546463	0.167036	0.743552	1
FBgn0002906	Blm	9.32616	0.799109	0.364686	0.0284355	0.852908
FBgn0002917	na	5.78345	-0.983353	1.28415	0.443817	1
FBgn0002921	Atpalpha	13.6786	0.0743197	0.11992	0.535426	1
FBgn0002922	nau	3.33628	0.251522	0.484051	0.603329	1
FBgn0002924	ncd	10.4433	0.0187394	0.18756	0.920415	1
FBgn0002930	nec	7.76742	-2.54574	0.742612	0.000607838	0.0690784
FBgn0002931	net	8.16462	-0.18291	0.165845	0.270072	1
FBgn0002932	neur	9.58633	0.00259906	0.217586	0.99047	1
FBgn0002936	ninaA	0.383144	0.610273	1.54388	0.692633	1
FBgn0002938	ninaC	4.77894	0.443579	0.491708	0.366993	1
FBgn0002939	ninaD	2.50796	-0.833987	1.52358	0.584114	1
FBgn0002941	slou	0.371255	-1.32	1.56894	0.400161	1
FBgn0002945	nkd	12.143	-0.0170529	0.297009	0.954214	1
FBgn0002948	nod	8.95017	0.0697554	0.199297	0.726333	1
FBgn0002962	nos	2.29879	0.185351	0.713292	0.794977	1
FBgn0002973	numb	12.6111	0.0139821	0.24074	0.953685	1
FBgn0002985	odd	7.13659	-0.0449735	0.426174	0.915956	1
FBgn0002989	okr	7.8972	0.198208	0.186707	0.288418	1
FBgn0003002	opa	9.00225	0.0143016	0.308079	0.962974	1
FBgn0003008	or	8.82857	-0.0404187	0.520866	0.938147	1
FBgn0003016	osp	11.0743	0.00653825	0.207104	0.974815	1
FBgn0003023	otu	1.77263	1.41662	0.987809	0.151543	1
FBgn0003028	ovo	12.7015	-0.118445	0.230565	0.607449	1
FBgn0003041	pbl	10.1517	0.0260995	0.249062	0.916542	1
FBgn0003042	Pc	8.73914	0.0293637	0.25226	0.907333	1
FBgn0003044	Pcl	10.8539	0.0932319	0.12416	0.452714	1
FBgn0003046	Pcp	3.24221	0.491861	0.933315	0.598191	1
FBgn0003048	pcx	10.9137	-0.0513784	0.236422	0.827961	1
FBgn0003053	peb	7.79617	-0.0894243	0.311872	0.774316	1
FBgn0003060	CG9757	1.86775	3.46862	2.57647	0.178216	1
FBgn0003062	Fib	11.6923	-0.066643	0.301876	0.825277	1
FBgn0003065	CG2150	7.87585	-0.967763	0.686162	0.158422	1
FBgn0003068	per	3.95515	-0.239619	0.928278	0.796305	1
FBgn0003071	Pfk	11.0577	0.0549018	0.0986991	0.578037	1
FBgn0003074	Pgi	10.9128	-0.0336399	0.11527	0.770412	1
FBgn0003076	Pgm1	8.71722	-0.0807535	0.282034	0.774629	1
FBgn0003079	Raf	9.96824	-0.0077154	0.23564	0.97388	1
FBgn0003082	phr	7.70937	0.162054	0.217398	0.456015	1
FBgn0003087	pim	8.77677	0.0860081	0.926378	0.926028	1
FBgn0003089	pip	9.37414	-0.315299	0.558085	0.572097	1
FBgn0003090	pk	12.2393	-0.0686459	0.300426	0.819261	1
FBgn0003091	Pkc53E	3.88457	0.129287	0.916774	0.887851	1
FBgn0003093	Pkc98E	11.1077	0.0843085	0.161973	0.602708	1
FBgn0003116	pn	6.65173	0.172374	0.214124	0.420808	1
FBgn0003117	pnr	8.73303	-0.0886864	0.262527	0.735501	1
FBgn0003118	pnt	9.86779	-0.0340755	0.161873	0.833271	1
FBgn0003124	polo	11.8751	0.114353	0.31253	0.714445	1
FBgn0003129	Poxm	2.08733	-1.79461	1.14398	0.116708	1
FBgn0003130	Poxn	8.03113	0.0528309	0.115539	0.647487	1
FBgn0003134	Pp1alpha-96A	10.0321	0.0370582	0.0787856	0.638092	1
FBgn0003137	Ppn	12.516	-0.0773334	0.256606	0.763132	1
FBgn0003139	PpV	9.97819	0.0360145	0.126332	0.775584	1
FBgn0003141	pr	9.39484	0.0860912	0.663096	0.896699	1
FBgn0003149	Prm	5.4826	2.03197	0.847958	0.0165612	0.632697
FBgn0003159	CG2841	9.9351	0.00171137	0.162423	0.991593	1
FBgn0003162	Pu	9.0343	-0.0544672	0.301867	0.856812	1
FBgn0003165	pum	12.8676	-0.103046	0.31486	0.74346	1
FBgn0003169	put	11.4263	0.00868546	0.170449	0.95936	1
FBgn0003174	pwn	12.1092	0.064044	0.253647	0.800661	1
FBgn0003175	px	10.8599	0.0311231	0.295634	0.916157	1
FBgn0003187	qua	8.87564	-0.0153625	0.956205	0.987182	1
FBgn0003189	r	11.4291	-0.0391512	0.184913	0.832319	1
FBgn0003204	ras	11.3537	-0.133986	0.185987	0.471276	1
FBgn0003205	Ras85D	11.9568	0.0265389	0.205119	0.897055	1
FBgn0003206	Ras64B	10.9043	-0.0516788	0.145976	0.723323	1
FBgn0003209	raw	10.05	-0.0303141	0.147842	0.837538	1
FBgn0003210	rb	10.9946	-0.114063	0.173173	0.510112	1
FBgn0003218	rdgB	9.62168	0.0547063	0.264299	0.836021	1
FBgn0003227	rec	7.8134	-0.0428088	0.153909	0.780902	1
FBgn0003231	ref(2)P	11.1837	-0.000137195	0.0832531	0.998685	1
FBgn0003250	Rh4	0.0303909	-0.82049	1.46838	0.576318	1
FBgn0003254	rib	3.53178	0.741952	1.49404	0.619466	1
FBgn0003255	rk	4.99309	-0.336078	0.627641	0.592331	1
FBgn0003256	rl	9.21146	0.0452641	1.00714	NA	NA
FBgn0003257	r-l	9.85697	0.0387263	0.234019	0.868564	1
FBgn0003261	Rm62	15.2724	-0.026588	0.258059	0.917938	1
FBgn0003268	rod	10.1415	0.179643	0.263046	0.494648	1
FBgn0003270	amos	-0.845214	0	4.55927	1	NA
FBgn0003274	RpLP2	15.4974	-0.0476272	0.361131	0.895076	1
FBgn0003275	RpII18	10.4281	0.0219077	0.239471	0.927108	1
FBgn0003277	RpII215	12.2009	0.0660527	0.159641	0.679051	1
FBgn0003278	RpI135	9.29952	-0.0798448	0.5286	0.879937	1
FBgn0003279	RpL4	16.1727	-0.038938	0.326453	0.905057	1
FBgn0003285	rst	10.4898	-0.0597331	0.145042	0.680462	1
FBgn0003292	rt	10.2622	-0.0968228	0.311996	0.756307	1
FBgn0003295	ru	6.17079	0.171839	0.475189	0.717634	1
FBgn0003300	run	0.828631	-2.97333	2.56554	0.246477	1
FBgn0003301	rut	11.091	-0.105675	0.23614	0.654508	1
FBgn0003302	rux	8.50885	0.0678112	0.240968	0.778395	1
FBgn0003308	ry	4.41622	-1.19749	0.701826	0.0879619	1
FBgn0003310	S	11.0052	-0.0363182	0.252198	0.885495	1
FBgn0003312	sad	5.61989	-0.961796	0.433423	0.0264818	0.819129
FBgn0003317	sax	10.4663	-0.0142828	0.108443	0.895215	1
FBgn0003319	Sb	11.4429	-0.189379	0.460669	0.681003	1
FBgn0003321	sbr	10.7742	-0.117327	0.129606	0.365329	1
FBgn0003326	sca	9.31407	-0.146408	0.201431	0.467326	1
FBgn0003330	Sce	9.93138	-0.0794932	0.271692	0.769839	1
FBgn0003334	Scm	10.3981	0.038987	0.176215	0.8249	1
FBgn0003339	Scr	5.9381	-1.16098	1.10471	0.293288	1
FBgn0003345	sd	12.5322	0.0345947	0.283663	0.902933	1
FBgn0003346	RanGAP	10.9971	0.125899	0.234212	0.590892	1
FBgn0003353	sei	8.68252	0.06285	0.332727	0.850176	1
FBgn0003356	Jon99Cii	1.94248	0.869179	2.41077	0.718444	1
FBgn0003357	Jon99Ciii	2.11106	2.10822	2.0876	0.312555	1
FBgn0003360	sesB	13.9973	0.0224452	0.168981	0.89433	1
FBgn0003366	sev	6.47919	1.42241	0.727646	0.0506059	1
FBgn0003371	sgg	11.8483	0.0707923	0.25279	0.779444	1
FBgn0003372	Sgs1	-0.161334	-1.60487	5.05157	0.750714	NA
FBgn0003373	Sgs3	3.38193	0.459871	1.4935	0.758146	1
FBgn0003374	Sgs4	1.53816	-0.659153	1.64489	0.688622	1
FBgn0003375	Sgs5	1.60961	-0.0599541	1.81591	0.973662	1
FBgn0003377	Sgs7	2.65831	-0.293086	1.35748	0.829062	1
FBgn0003378	Sgs8	1.63763	-0.370547	1.20095	0.757667	1
FBgn0003380	Sh	3.74671	-0.821354	1.03363	0.426827	1
FBgn0003382	sha	10.9797	-0.732148	0.618256	0.236328	1
FBgn0003386	Shaw	3.75987	1.23676	1.04692	0.237471	1
FBgn0003388	shd	7.59774	-0.909782	0.442405	0.0397394	1
FBgn0003390	shf	12.4653	-0.0114506	0.123616	0.926197	1
FBgn0003391	shg	13.4142	0.0511174	0.17237	0.766806	1
FBgn0003392	shi	11.3149	-0.000269322	0.0980408	0.997808	1
FBgn0003396	shn	10.9689	-0.00163348	0.24409	0.994661	1
FBgn0003401	shu	6.9218	0.195035	0.265356	0.462344	1
FBgn0003410	sina	10.8232	0.0459524	0.232133	0.843079	1
FBgn0003411	sisA	-0.647494	-0.700733	5.20164	0.892838	NA
FBgn0003415	skd	11.7387	-0.0561443	0.218117	0.796867	1
FBgn0003416	sl	9.25858	0.0496821	0.264346	0.850921	1
FBgn0003423	slgA	10.337	-0.0612323	0.163981	0.708842	1
FBgn0003429	slo	3.04369	0.510369	0.932147	0.584021	1
FBgn0003430	slp1	5.00022	1.25439	1.09145	0.250437	1
FBgn0003435	sm	9.60278	-0.478454	0.911729	0.599739	1
FBgn0003444	smo	10.4047	0.028383	0.369656	0.938797	1
FBgn0003447	sn	12.8977	-0.0619304	0.296702	0.83466	1
FBgn0003448	sna	1.1432	0.226383	1.42662	0.873917	1
FBgn0003449	snf	10.645	0.0167404	0.212398	0.937179	1
FBgn0003450	snk	-0.917055	0	4.54715	1	NA
FBgn0003459	stwl	8.93838	0.0184032	0.232456	0.936899	1
FBgn0003460	so	7.4105	-0.0275927	0.429126	0.948731	1
FBgn0003462	Sod1	12.4709	-0.0798142	0.304965	0.793541	1
FBgn0003463	sog	12.0892	0.0348489	0.282648	0.901874	1
FBgn0003464	sol	11.6736	-0.0581157	0.286965	0.839511	1
FBgn0003475	spir	11.3814	0.1381	0.297738	0.642771	1
FBgn0003479	spn-A	8.46174	-0.0285161	0.173811	0.869681	1
FBgn0003480	spn-B	6.91005	0.713341	0.307336	0.0202843	0.712436
FBgn0003482	spn-D	4.83388	0.460787	0.299247	0.123604	1
FBgn0003483	spn-E	5.03318	0.444581	0.384244	0.247261	1
FBgn0003486	spo	0.955084	2.05401	1.80216	0.25439	1
FBgn0003495	spz	7.33315	-0.0653865	0.430511	0.879281	1
FBgn0003499	sr	8.26157	-0.196638	0.412286	0.633401	1
FBgn0003502	Btk29A	11.5929	-0.0265848	0.112815	0.813705	1
FBgn0003507	srp	8.95828	-0.572794	0.475154	0.228014	1
FBgn0003512	Sry-delta	10.1263	0.160907	0.261228	0.537918	1
FBgn0003513	ss	9.03043	0.0234541	0.288257	0.935152	1
FBgn0003514	sqh	12.045	0.00566354	0.108753	0.958467	1
FBgn0003515	st	4.4802	0.733735	0.4977	0.140414	1
FBgn0003517	sta	16.0333	-0.0455442	0.296976	0.878115	1
FBgn0003520	stau	11.2966	-0.0316325	0.129832	0.807509	1
FBgn0003525	stg	13.0693	0.322024	0.300498	0.283885	1
FBgn0003545	sub	8.89277	0.159184	0.42119	0.705476	1
FBgn0003557	Su(dx)	10.6706	-0.0817668	0.167309	0.625043	1
FBgn0003559	su(f)	10.6082	0.0210774	0.154103	0.891208	1
FBgn0003567	su(Hw)	11.1936	0.132566	0.167379	0.428355	1
FBgn0003575	su(sable)	11.171	0.0322525	0.153211	0.83327	1
FBgn0003598	Su(var)3-7	10.9641	0.163077	0.249131	0.512736	1
FBgn0003607	Su(var)205	12.4512	0.144674	0.245154	0.5551	1
FBgn0003612	Su(var)2-10	11.5376	0.0500139	0.242277	0.836453	1
FBgn0003638	su(w[a])	12.5348	0.0187	0.188517	0.920983	1
FBgn0003651	svp	8.73126	-0.274009	0.395438	0.488356	1
FBgn0003654	sw	9.79864	-0.0145821	0.221183	0.947435	1
FBgn0003655	swa	-0.756026	-0.707672	4.61152	0.878038	NA
FBgn0003656	sws	10.3543	-0.012544	0.138753	0.927965	1
FBgn0003660	Syb	11.9157	0.00119282	0.0906685	0.989503	1
FBgn0003676	CCT1	12.4838	0.0442111	0.125064	0.723708	1
FBgn0003687	Tbp	9.20084	0.015418	0.150379	0.918338	1
FBgn0003701	thr	8.26794	0.122919	0.617057	0.842105	1
FBgn0003710	tipE	5.29487	-1.56691	1.20667	0.194101	1
FBgn0003714	tko	9.70827	-0.0319809	0.423734	NA	NA
FBgn0003716	tkv	13.8698	0.00731562	0.209396	0.97213	1
FBgn0003719	tld	9.16305	0.0689051	0.497443	0.889831	1
FBgn0003721	Tm1	13.1932	0.0665691	0.259138	0.797266	1
FBgn0003731	Egfr	13.02	-0.0268904	0.163747	0.869558	1
FBgn0003733	tor	-0.193895	-2.44856	2.27553	0.281909	NA
FBgn0003741	tra	8.99585	0.103082	0.0958658	0.282251	1
FBgn0003742	tra2	9.97518	0.0834064	0.211176	0.692871	1
FBgn0003744	trc	10.8574	-0.00378195	0.0952756	0.968336	1
FBgn0003747	Gr5a	11.288	0.0580713	0.168566	0.730469	1
FBgn0003748	Treh	9.68671	-0.0257891	0.266408	0.922883	1
FBgn0003751	trk	1.08268	0.479274	1.14944	0.676705	1
FBgn0003862	trx	11.9593	0.00288798	0.310492	0.992579	1
FBgn0003863	alphaTry	0.111411	-2.95435	3.55643	0.406139	1
FBgn0003865	tsg	-1.19142	-0.700737	3.88017	0.856686	NA
FBgn0003866	tsh	11.6378	0.0180756	0.179309	0.919704	1
FBgn0003867	tsl	10.3333	-0.0279413	0.222657	0.900135	1
FBgn0003870	ttk	12.9742	0.105102	0.212592	0.621037	1
FBgn0003882	tub	10.1436	-0.0109165	0.342883	0.974602	1
FBgn0003884	alphaTub84B	16.1145	0.0177256	0.180128	0.92161	1
FBgn0003885	alphaTub84D	11.7172	0.0545124	0.138774	0.694457	1
FBgn0003886	alphaTub85E	8.2969	-0.547253	0.472326	0.246606	1
FBgn0003888	betaTub60D	13.1221	-0.107484	0.412446	0.794399	1
FBgn0003890	betaTub97EF	9.40495	-0.471866	0.449524	0.293855	1
FBgn0003891	tud	12.6154	0.0472178	0.312351	0.879842	1
FBgn0003892	ptc	11.1549	0.00692829	0.205006	0.97304	1
FBgn0003896	tup	8.03378	-0.0541332	0.57892	0.9255	1
FBgn0003900	twi	8.41135	-0.112902	0.54006	0.834406	1
FBgn0003922	snRNA:U2:38ABa	-0.239961	0.323684	1.75548	0.853711	NA
FBgn0003930	snRNA:U4:39B	0.39934	1.02322	1.59811	0.522	1
FBgn0003941	RpL40	14.6055	-0.071672	0.138684	0.605296	1
FBgn0003942	RpS27A	15.3234	-0.0356124	0.207373	0.863649	1
FBgn0003943	Ubi-p63E	12.3967	0.0683	0.46765	0.883882	1
FBgn0003944	Ubx	6.71981	-0.68905	0.600278	0.251016	1
FBgn0003950	unc	5.3703	0.296019	0.306971	0.334884	1
FBgn0003963	ush	10.2118	0.00198529	0.300027	0.99472	1
FBgn0003964	usp	10.7073	-0.0442044	0.19776	0.823126	1
FBgn0003965	v	2.6513	-4.24848	2.26483	0.0606758	1
FBgn0003969	vap	11.0281	-0.0339465	0.283019	0.904527	1
FBgn0003975	vg	12.0614	0.0534065	0.281182	0.849359	1
FBgn0003977	vir	10.8291	-0.084269	0.216019	0.696463	1
FBgn0003978	vls	8.70033	0.0140293	0.191994	0.941749	1
FBgn0003979	Vm26Aa	-1.28858	0	3.73615	1	NA
FBgn0003984	vn	9.79155	0.0981432	0.115212	0.394296	1
FBgn0003996	w	5.53803	-1.61786	0.566214	0.00427226	0.26885
FBgn0003997	hid	10.832	-0.102134	0.304999	0.737726	1
FBgn0004003	wbl	11.4575	-0.278935	0.481138	0.56209	1
FBgn0004034	y	0.288555	0.973791	1.53176	0.524951	1
FBgn0004045	Yp1	-0.803978	0.971455	3.84884	0.80073	NA
FBgn0004047	Yp3	8.05273	-0.613067	1.37714	NA	NA
FBgn0004049	yrt	11.6305	0.0452278	0.179014	0.800539	1
FBgn0004050	z	10.8352	0.0894669	0.205799	0.663758	1
FBgn0004055	uzip	9.94777	0.00948055	0.17096	0.955776	1
FBgn0004057	Zw	8.85058	-0.0514277	0.175859	0.769952	1
FBgn0004066	Prosalpha4	11.7162	0.0418457	0.212231	0.843694	1
FBgn0004087	Dhfr	9.02312	0.0694246	0.288544	0.809863	1
FBgn0004101	bs	12.6681	-0.0562948	0.364934	0.877404	1
FBgn0004102	oc	0.271267	2.25028	1.68952	0.182891	1
FBgn0004103	Pp1-87B	13.1424	0.0260586	0.105136	0.804246	1
FBgn0004106	Cdk1	10.7312	0.119178	0.674826	0.859819	1
FBgn0004107	Cdk2	9.55955	0.17617	0.364032	0.628429	1
FBgn0004108	Nrt	12.5854	-0.134294	0.328309	0.682506	1
FBgn0004110	tin	1.21814	-0.578283	1.42478	0.684835	1
FBgn0004117	Tm2	5.51883	1.18354	0.93665	0.206379	1
FBgn0004118	nAChRbeta2	3.58962	0.190997	0.462678	0.679747	1
FBgn0004132	boca	10.7327	-0.0563361	0.152365	0.711573	1
FBgn0004133	blow	11.1958	0.0888218	0.174739	0.611235	1
FBgn0004167	kst	12.7183	0.106353	0.328417	0.746063	1
FBgn0004168	5-HT1A	2.60321	-0.423424	1.29511	0.743712	1
FBgn0004169	up	6.31016	1.57563	0.782219	0.0439772	1
FBgn0004170	sc	8.54332	0.0849424	0.8376	0.919224	1
FBgn0004177	mts	13.359	0.0511629	0.11042	0.643116	1
FBgn0004179	Csp	11.2795	-0.0063383	0.223907	0.977417	1
FBgn0004192	snRNA:U2:34ABb	-0.790542	-1.25968	3.23895	0.697338	NA
FBgn0004197	Ser	12.3838	0.0617739	0.220469	0.779329	1
FBgn0004198	ct	10.0071	-0.208636	0.301612	0.489103	1
FBgn0004227	nonA	12.1894	-0.0489302	0.135621	0.71826	1
FBgn0004228	mex1	-1.17117	1.34845	2.29544	0.556903	NA
FBgn0004237	Hrb87F	13.0225	0.0270609	0.141971	0.848832	1
FBgn0004240	DptA	1.37396	1.46803	1.7364	0.397864	1
FBgn0004242	Syt1	6.53921	-3.24338	0.796353	4.64519e-05	0.0103218
FBgn0004244	Rdl	3.7731	-3.75403	1.36016	0.00578043	0.331858
FBgn0004359	T48	10.5762	-0.25445	0.213967	0.23436	1
FBgn0004360	Wnt2	11.166	-0.232178	0.412357	0.5734	1
FBgn0004362	HmgD	14.1305	0.093605	0.180056	0.603158	1
FBgn0004363	porin	13.5002	0.0314423	0.116607	0.787434	1
FBgn0004364	18w	12.7747	0.0153832	0.217754	0.94368	1
FBgn0004367	mei-41	8.40058	0.127971	0.257679	0.619452	1
FBgn0004368	Ptp4E	10.6287	0.0162032	0.272799	0.952637	1
FBgn0004369	Ptp99A	10.6723	0.0298873	0.153327	0.845452	1
FBgn0004370	Ptp10D	11.4217	0.0820011	0.213468	0.700876	1
FBgn0004373	fwd	11.2624	0.0019258	0.172161	0.991075	1
FBgn0004374	neb	8.51468	0.0840295	0.202429	0.678065	1
FBgn0004378	Klp61F	10.3771	0.106281	0.344983	0.758025	1
FBgn0004379	Klp67A	9.74281	0.118742	0.196423	0.545498	1
FBgn0004380	Klp64D	8.7279	-0.040847	0.297237	0.890697	1
FBgn0004381	Klp68D	7.69307	0.142424	0.140936	0.312227	1
FBgn0004387	Klp98A	10.8779	-0.0679623	0.219716	0.757079	1
FBgn0004390	RasGAP1	11.1758	0.0372624	0.197505	0.850355	1
FBgn0004391	shtd	10.013	-0.0150186	0.181922	0.934205	1
FBgn0004394	pdm2	10.9968	-0.0546943	0.237936	0.818193	1
FBgn0004395	unk	10.4629	0.0622185	0.0819935	0.447959	1
FBgn0004396	CrebA	11.0475	-0.116502	0.373258	0.754947	1
FBgn0004397	Vinc	11.6586	-0.0710613	0.271598	0.793598	1
FBgn0004400	rhi	0.728513	0.438856	1.29109	0.733924	1
FBgn0004401	Pep	13.9224	0.0255135	0.254089	0.920018	1
FBgn0004403	RpS14a	14.5257	-0.158261	0.361179	0.661256	1
FBgn0004404	RpS14b	12.9569	-0.10704	0.276848	0.699023	1
FBgn0004406	tam	8.19752	0.0982051	0.501569	0.84477	1
FBgn0004419	me31B	11.8206	0.00948599	0.778229	0.990275	1
FBgn0004425	LysB	1.64932	-1.14595	1.62531	0.48077	1
FBgn0004426	LysC	0.247685	-3.04614	2.89353	0.29246	1
FBgn0004427	LysD	2.91372	-2.05292	1.43966	0.153875	1
FBgn0004428	LysE	0.818875	-1.66984	3.1235	0.592924	1
FBgn0004429	LysP	0.0786723	-0.700739	3.27083	0.830361	1
FBgn0004430	LysS	2.0838	-2.41988	1.3596	0.0751019	1
FBgn0004431	LysX	-0.175012	2.13078	2.37869	0.370371	NA
FBgn0004432	Cyp1	14.7285	0.0428784	0.283655	0.879846	1
FBgn0004435	Galphaq	8.6239	0.0924379	0.80906	NA	NA
FBgn0004436	Ubc6	10.9034	0.0731192	0.334699	0.827069	1
FBgn0004449	Ten-m	13.1235	0.00731992	0.192921	0.969733	1
FBgn0004456	mew	11.7813	0.0414382	0.230896	0.857571	1
FBgn0004463	RpIII128	9.42647	0.0589467	0.226042	0.794264	1
FBgn0004465	Su(P)	9.25893	0.00455376	0.211189	0.982797	1
FBgn0004507	GlyP	10.5535	0.149243	0.398623	0.708109	1
FBgn0004509	Fur1	10.698	-0.016602	0.242178	0.945346	1
FBgn0004510	Ets97D	9.1307	0.0272784	0.134737	0.839559	1
FBgn0004511	dy	5.79749	-0.13306	0.604987	0.825919	1
FBgn0004512	Mdr49	11.1859	-0.239759	0.213181	0.260727	1
FBgn0004513	Mdr65	3.80535	0.254575	0.725354	0.725614	1
FBgn0004514	Oct-TyrR	0.0351341	1.4321	1.96836	0.466883	1
FBgn0004516	Gad1	-1.02659	1.4155	4.61424	0.759019	NA
FBgn0004552	Akh	2.62165	0.206703	0.811298	0.798892	1
FBgn0004554	Edg91	5.48237	-0.0140513	0.485733	0.976922	1
FBgn0004556	Dbp73D	8.39168	-0.00939543	0.304018	0.975346	1
FBgn0004567	slp2	3.4259	1.19624	1.01366	0.237953	1
FBgn0004569	aos	8.66536	-0.0567044	0.197388	0.773903	1
FBgn0004573	5-HT7	1.29168	-0.147172	0.934174	0.874817	1
FBgn0004574	Rop	12.2577	-0.0916499	0.145711	0.529359	1
FBgn0004575	Syn	5.25086	-0.0470915	0.416819	0.910048	1
FBgn0004577	Pxd	6.78212	0.177364	0.473047	0.707706	1
FBgn0004580	Cbp53E	1.79504	0.60202	1.47274	0.682705	1
FBgn0004581	bgcn	3.37168	0.451843	0.425505	0.288281	1
FBgn0004583	ex	12.638	0.0726441	0.197877	0.713531	1
FBgn0004584	Rrp1	11.3647	0.0930448	0.21633	0.667119	1
FBgn0004587	B52	13.7104	0.0326864	0.216551	0.880023	1
FBgn0004588	Eig71Ea	-0.976599	1.94001	3.85162	0.614483	NA
FBgn0004592	Eig71Ee	1.51562	1.25455	1.69513	0.459246	1
FBgn0004595	pros	8.32035	0.0250811	0.646459	0.969052	1
FBgn0004597	CycC	9.13726	0.0825068	0.335072	0.805499	1
FBgn0004598	Fur2	12.1294	-0.0266116	0.166744	0.8732	1
FBgn0004606	zfh1	9.95226	-0.134031	0.355707	0.706322	1
FBgn0004607	zfh2	11.8779	0.091446	0.445021	0.837192	1
FBgn0004611	Plc21C	9.96767	-0.0906627	0.15064	0.547274	1
FBgn0004618	gl	0.809828	-0.354696	1.49393	0.812328	1
FBgn0004619	GluRIA	-0.965626	-1.32105	2.35647	0.575067	NA
FBgn0004620	GluRIIA	1.37947	0.762245	1.20085	0.525589	1
FBgn0004622	TkR99D	-0.0259103	0.0206052	2.1837	0.992471	NA
FBgn0004623	Gbeta76C	-0.930145	2.16234	2.81565	0.442503	NA
FBgn0004629	Cys	6.81055	-0.682481	0.645899	0.290678	1
FBgn0004635	rho	8.91795	-0.0406369	0.352251	0.908157	1
FBgn0004636	Rap1	11.7531	0.05772	0.131496	0.660699	1
FBgn0004638	drk	11.2582	0.0100131	0.285155	0.971988	1
FBgn0004643	Zw10	10.4092	0.0295717	0.183367	0.87188	1
FBgn0004644	hh	11.0177	-0.0563304	0.274188	0.837225	1
FBgn0004646	ogre	13.6502	-0.0651524	0.230762	0.777686	1
FBgn0004647	N	13.8932	-0.0346549	0.181464	0.848546	1
FBgn0004648	svr	11.3216	-0.0948109	0.274292	0.729601	1
FBgn0004650	fs(1)N	2.95767	0.863703	0.922772	0.34928	1
FBgn0004652	fru	12.3183	0.30554	0.587669	0.603121	1
FBgn0004654	Pgd	10.8018	-0.0218194	0.24454	0.928902	1
FBgn0004655	wapl	10.852	0.0636284	0.24074	0.791547	1
FBgn0004656	fs(1)h	12.7636	0.0209913	0.250891	0.933321	1
FBgn0004657	mys	12.2866	-0.000627116	0.130723	0.996172	1
FBgn0004687	Mlc-c	11.8857	0.0230456	0.298498	0.93846	1
FBgn0004698	Xpc	10.8862	0.0526104	0.340057	0.877049	1
FBgn0004777	Ccp84Ag	0.149618	-0.689369	3.32894	0.835944	1
FBgn0004780	Ccp84Ad	0.192956	3.12969	2.75366	0.255724	1
FBgn0004782	Ccp84Ab	-1.42465	-1.65749	3.21463	0.606128	NA
FBgn0004783	Ccp84Aa	0.746449	-0.983428	2.19806	0.654581	1
FBgn0004784	inaC	-0.79546	0	5.20164	1	NA
FBgn0004795	retn	0.876428	-0.995475	1.56298	0.524184	1
FBgn0004797	mdy	8.95928	0.0239116	0.939485	0.979695	1
FBgn0004811	fs(2)ltoPP43	10.1192	0.0437537	0.237437	0.853798	1
FBgn0004828	His3.3B	14.5213	-0.0188965	0.2629	0.9427	1
FBgn0004832	Xpac	9.09334	0.182467	0.272669	0.503377	1
FBgn0004837	Su(H)	9.83387	0.142652	0.0950873	0.133556	1
FBgn0004838	Hrb27C	14.3341	0.0508825	0.270592	0.850844	1
FBgn0004839	otk	11.0253	-0.0894381	0.203472	0.660256	1
FBgn0004841	TkR86C	1.03772	0.976628	1.06151	0.357555	1
FBgn0004852	Ac76E	5.10826	0.123485	0.35375	0.727034	1
FBgn0004854	B-H2	6.60315	-0.207987	0.522734	0.690716	1
FBgn0004855	RpII15	9.67491	0.162115	0.277623	0.559261	1
FBgn0004856	Bx42	10.8732	0.132575	0.305884	0.664712	1
FBgn0004858	elB	10.602	0.0457348	0.247102	0.853163	1
FBgn0004859	ci	11.9343	0.0188174	0.673955	0.977725	1
FBgn0004860	ph-d	10.4064	0.152818	0.102981	0.137823	1
FBgn0004861	ph-p	10.9958	-0.0124704	0.125232	0.920679	1
FBgn0004862	bap	-2.31462e-05	0	5.20164	1	1
FBgn0004863	C15	7.03835	0.0646843	0.530607	0.902973	1
FBgn0004864	hop	10.5417	0.00233505	0.147636	0.987381	1
FBgn0004865	Eip78C	12.633	-0.339275	0.582294	0.560127	1
FBgn0004867	RpS2	15.4642	-0.0274961	0.322463	0.932047	1
FBgn0004868	Gdi	13.1568	-0.0269097	0.185483	0.884648	1
FBgn0004870	bab1	5.66633	-0.29917	0.347338	0.38906	1
FBgn0004872	piwi	3.37846	-0.181321	0.450066	0.68704	1
FBgn0004875	enc	11.2766	0.00665275	0.242726	0.978134	1
FBgn0004876	cdi	11.2334	-0.0230347	0.146792	0.875307	1
FBgn0004878	cas	1.53239	0.0332421	0.929582	0.971473	1
FBgn0004880	scrt	4.78758	-2.03999	0.904692	0.0241398	0.784578
FBgn0004882	orb	2.37007	0.742288	0.650447	0.253788	1
FBgn0004885	tok	12.2698	-0.129029	0.145508	0.375216	1
FBgn0004888	Scsalpha1	11.7962	-0.0498392	0.303122	0.869401	1
FBgn0004889	tws	11.641	0.0545378	0.153245	0.721925	1
FBgn0004892	sob	9.07568	-0.0189738	0.346684	0.956354	1
FBgn0004893	bowl	13.2882	-0.00394404	0.142307	0.97789	1
FBgn0004895	FoxL1	-1.26938	0	3.17563	1	NA
FBgn0004897	fd96Ca	4.0988	-3.72533	1.66351	0.0251275	0.799967
FBgn0004898	fd96Cb	5.25549	-3.40103	1.39282	0.0146127	0.591463
FBgn0004901	Prat	10.2136	0.0913929	0.169314	0.589346	1
FBgn0004903	Rb97D	10.2525	0.132781	0.150834	0.378689	1
FBgn0004907	14-3-3zeta	13.7572	0.0527887	0.354165	0.881513	1
FBgn0004908	Arl2	8.33279	0.0189186	0.256941	0.941305	1
FBgn0004910	Eip63F-1	4.03457	0.726619	0.511335	0.15531	1
FBgn0004913	Gnf1	10.2331	0.105561	0.185368	0.569039	1
FBgn0004914	Hnf4	9.68798	-0.112552	0.196782	0.567348	1
FBgn0004915	TfIIB	10.1999	0.103602	0.335316	0.757347	1
FBgn0004919	gol	5.30145	-1.48607	0.702351	0.0343579	0.964147
FBgn0004921	Ggamma1	12.1421	0.0608875	0.275279	0.824948	1
FBgn0004924	Top1	12.2505	-0.0288638	0.154475	0.851778	1
FBgn0004926	eIF2beta	12.3025	-0.0131839	0.152643	0.931172	1
FBgn0004956	upd1	10.1868	0.0364956	0.205847	0.859277	1
FBgn0004957	por	9.85566	0.016096	0.259362	0.950515	1
FBgn0004959	phm	7.16388	0.272277	0.401972	0.498183	1
FBgn0005198	gig	10.4291	0.0735179	0.153755	0.632544	1
FBgn0005278	Sam-S	12.4616	0.0153486	0.252714	0.95157	1
FBgn0005322	nmd	9.5629	0.0256343	0.567937	0.963999	1
FBgn0005355	Su(fu)	10.5413	0.0406029	0.125349	0.746	1
FBgn0005386	ash1	10.0083	0.111233	0.397605	0.779664	1
FBgn0005391	Yp2	1.98282	-0.056212	0.639866	0.929996	1
FBgn0005411	U2af50	11.7082	0.050064	0.266887	0.851202	1
FBgn0005427	ewg	10.7219	-0.0300505	0.196908	0.878705	1
FBgn0005533	RpS17	14.861	-0.0373864	0.15482	0.809181	1
FBgn0005536	Mbs	11.2838	0.0501909	0.122873	0.682923	1
FBgn0005558	ey	4.07543	0.468076	0.509748	0.358488	1
FBgn0005561	sv	5.91302	-0.560623	1.17806	0.634156	1
FBgn0005564	Shal	4.49294	0.0154407	0.536259	0.977029	1
FBgn0005585	Calr	14.8752	0.0233821	0.115782	0.839957	1
FBgn0005586	Rab3	5.02828	0.192673	0.776418	0.804014	1
FBgn0005593	RpL7	15.5127	-0.0134177	0.168214	0.936424	1
FBgn0005596	yem	9.95046	0.193383	0.14355	0.177933	1
FBgn0005612	Sox14	10.3275	-0.16475	0.310106	0.595232	1
FBgn0005613	Sox15	10.82	0.184434	0.221766	0.405601	1
FBgn0005616	msl-2	9.18657	0.213722	0.159318	0.179765	1
FBgn0005617	msl-1	9.76996	0.011064	0.257072	0.965671	1
FBgn0005619	Hdc	2.05766	-0.669366	1.25192	0.592876	1
FBgn0005624	Psc	10.7373	0.22977	0.183922	0.211562	1
FBgn0005626	ple	5.63863	-0.512065	0.714484	0.473564	1
FBgn0005631	robo1	11.0971	-0.0432596	0.227587	0.849247	1
FBgn0005632	faf	12.2478	0.0147	0.203802	0.942499	1
FBgn0005633	fln	-1.38132	2.48617	2.66207	0.350343	NA
FBgn0005636	nvy	7.98351	-0.0757663	0.383674	0.843455	1
FBgn0005638	slbo	2.18623	1.06457	1.42924	0.45636	1
FBgn0005640	Eip63E	10.6611	-0.0270922	0.122124	0.824437	1
FBgn0005642	wdn	9.98333	-0.019063	0.145861	0.896018	1
FBgn0005648	Pabp2	12.309	0.138133	0.235163	0.556942	1
FBgn0005649	Rox8	12.477	-0.00230581	0.227295	0.991906	1
FBgn0005655	PCNA	11.1308	0.190362	0.205121	0.353382	1
FBgn0005658	Ets65A	4.52482	0.429405	1.12637	0.703034	1
FBgn0005659	Ets98B	8.8519	-0.0148083	0.240698	0.950943	1
FBgn0005660	Ets21C	6.56517	-0.106611	0.368815	0.772532	1
FBgn0005664	Crys	5.14263	-0.34309	0.708614	0.628265	1
FBgn0005666	bt	5.93287	-0.427707	1.00557	0.670592	1
FBgn0005670	Cyp4d1	5.37417	-2.68013	1.73397	0.122187	1
FBgn0005671	Vha55	11.5226	-0.00747017	0.0862234	0.93096	1
FBgn0005672	spi	12.1765	0.118386	0.291964	0.685124	1
FBgn0005674	GluProRS	12.5661	0.0389532	0.108304	0.719097	1
FBgn0005677	dac	9.67506	-0.162739	0.435375	0.708559	1
FBgn0005683	pie	7.28632	0.211492	0.192338	0.271514	1
FBgn0005694	Aef1	10.12	-0.0557589	0.134637	0.678769	1
FBgn0005695	gcl	8.59405	0.064224	0.152742	0.674138	1
FBgn0005696	DNApol-alpha73	7.84167	0.276806	0.358771	0.440388	1
FBgn0005771	noc	11.6463	0.0816765	0.300012	0.785434	1
FBgn0005775	Con	8.2993	-0.09043	0.663858	0.891648	1
FBgn0005777	PpD3	9.94294	0.0579552	0.204137	0.776484	1
FBgn0008635	betaCOP	12.7617	-0.0338831	0.201986	0.86678	1
FBgn0008646	E5	10.0934	-0.0427185	0.313056	0.89146	1
FBgn0008651	lbl	2.35413	-3.28942	1.64684	0.0457812	1
FBgn0010014	CanB	3.90347	3.2591	1.20053	0.00663335	0.362934
FBgn0010015	CanA1	-0.268974	0.497432	2.85063	0.861474	NA
FBgn0010019	Cyp4g1	2.22182	-0.851464	1.30327	0.513544	1
FBgn0010038	GstD2	5.77063	-1.37744	0.720606	0.0559404	1
FBgn0010039	GstD3	9.84046	0.173593	0.808453	0.829984	1
FBgn0010040	GstD4	2.6076	0.35872	0.926238	0.698543	1
FBgn0010041	GstD5	6.28332	0.318935	0.841281	0.704609	1
FBgn0010042	GstD6	0.406916	-3.57088	2.67699	0.182231	1
FBgn0010043	GstD7	0.599321	0.749226	2.01339	0.709803	1
FBgn0010051	Itpr	11.2881	-0.0756486	0.182386	0.678309	1
FBgn0010052	Jhe	1.55667	-0.700741	1.73352	0.686043	1
FBgn0010053	Jheh1	7.24792	-0.376495	0.572607	0.510853	1
FBgn0010078	RpL23	15.4111	-0.0132451	0.353006	0.97007	1
FBgn0010097	gammaTub37C	1.29283	-0.0952466	0.945858	0.91979	1
FBgn0010100	mAcon1	12.3901	0.0620251	0.0912513	0.496683	1
FBgn0010105	comm	7.76173	0.125026	0.180101	0.487556	1
FBgn0010109	dpn	8.91277	0.127129	0.360992	0.724713	1
FBgn0010113	hdc	12.2095	0.0308984	0.268012	0.908217	1
FBgn0010114	hig	3.0228	0.393974	1.33322	0.767608	1
FBgn0010173	RpA-70	11.0132	0.0850924	0.305794	0.780808	1
FBgn0010194	Wnt5	11.6468	-0.0195372	0.274162	0.94319	1
FBgn0010197	Gyc32E	2.12564	-1.22295	0.987721	0.21566	1
FBgn0010198	RpS15Aa	14.6362	-0.0264618	0.114882	0.817828	1
FBgn0010213	Sod2	10.6909	0.0131808	0.213382	0.950745	1
FBgn0010215	alpha-Cat	11.2076	-0.0193832	0.959251	NA	NA
FBgn0010217	ATPsynbeta	13.8495	0.00873299	0.468826	0.985138	1
FBgn0010220	Dbp45A	8.77886	0.0850783	0.200473	0.671283	1
FBgn0010222	Nmdmc	9.01492	0.0478282	0.317251	0.880166	1
FBgn0010223	Galphaf	2.41378	-0.658465	0.864456	0.446232	1
FBgn0010225	Gel	11.667	-0.586996	0.216175	0.0066202	0.362934
FBgn0010226	GstS1	13.0366	-0.0231827	0.180397	0.897746	1
FBgn0010228	HmgZ	12.6642	0.00372142	0.142321	0.979139	1
FBgn0010235	Klc	11.2064	0.00823819	0.15477	0.95755	1
FBgn0010238	Lac	13.6423	0.00838332	0.153967	0.956577	1
FBgn0010240	Lcch3	4.79772	-0.458789	0.450042	0.307995	1
FBgn0010241	Mdr50	1.18862	1.28813	1.1354	0.256576	1
FBgn0010246	Myo61F	9.81749	-0.00840478	0.163888	0.9591	1
FBgn0010247	Parp	10.0441	0.0138996	0.917868	NA	NA
FBgn0010258	Rbp4	4.55472	0.412092	0.404234	0.307995	1
FBgn0010263	Rbp9	6.40111	0.810926	0.519699	0.118671	1
FBgn0010265	RpS13	15.2509	0.033456	0.158186	0.832499	1
FBgn0010269	Dsor1	10.1853	-0.063761	0.126834	0.615168	1
FBgn0010278	Ssrp	11.5796	0.144097	0.167115	0.388543	1
FBgn0010280	Taf4	11.909	-0.00894048	0.159861	0.9554	1
FBgn0010282	TfIIFalpha	10.8205	0.0367712	0.142727	0.796691	1
FBgn0010287	Trf	8.15267	0.0722251	0.137464	0.599298	1
FBgn0010288	Uch	11.0157	0.0607826	0.211858	0.774187	1
FBgn0010292	bys	9.75048	-0.0169469	0.172136	0.921574	1
FBgn0010300	brat	12.8588	-3.48088e-05	0.11887	0.999766	1
FBgn0010303	hep	10.8586	-0.0392767	0.243411	0.87181	1
FBgn0010309	pigeon	9.02229	-0.100334	0.134204	0.454687	1
FBgn0010313	corto	11.7894	0.0871585	0.285551	0.760192	1
FBgn0010314	Cks30A	9.79045	0.189431	0.261232	0.468363	1
FBgn0010315	CycD	10.0007	-0.0213924	0.174248	0.90229	1
FBgn0010316	dap	10.0381	0.267862	0.197514	0.175047	1
FBgn0010317	CycJ	-1.02666	0.74195	2.83291	0.793395	NA
FBgn0010328	woc	12.458	0.0621914	0.220984	0.778381	1
FBgn0010329	Tbh	0.449423	-0.712889	2.01602	0.723629	1
FBgn0010333	Rac1	11.2325	0.0804538	0.124633	0.518588	1
FBgn0010339	128up	10.637	-0.0143848	0.0757599	0.849408	1
FBgn0010340	140up	7.88913	-0.0309075	0.237567	0.896487	1
FBgn0010341	Cdc42	12.4059	0.0254546	0.131651	0.846685	1
FBgn0010342	Map60	11.6261	0.0875269	0.0981553	0.372544	1
FBgn0010348	Arf79F	13.4073	0.0532278	0.338747	0.875141	1
FBgn0010350	Cds	9.39157	0.0910311	0.237966	0.702062	1
FBgn0010352	Nc73EF	11.1538	0.00358081	0.204812	0.986051	1
FBgn0010355	Taf1	11.4553	0.00469279	0.205273	0.981761	1
FBgn0010356	Taf5	9.55759	0.0618247	0.150656	0.681535	1
FBgn0010357	betaTry	0.336835	-4.75812	4.90004	0.331529	1
FBgn0010379	Akt1	11.323	0.0989007	0.156009	0.526119	1
FBgn0010380	AP-1-2beta	11.9097	-0.0119298	0.199445	0.952303	1
FBgn0010382	CycE	9.68636	0.138461	0.261996	0.597162	1
FBgn0010383	Cyp18a1	6.10326	0.127737	0.686978	0.852492	1
FBgn0010385	Def	4.46382	-0.0805385	0.732844	0.91249	1
FBgn0010387	Acbp2	3.72091	-3.89372	2.14996	NA	NA
FBgn0010388	Dro	3.28891	0.578083	0.898459	0.519954	1
FBgn0010389	htl	8.15686	-0.117586	0.44266	0.79052	1
FBgn0010391	SrpRalpha	11.6733	-0.0671998	0.151207	0.656737	1
FBgn0010395	Itgbn	2.49362	-0.434177	0.626909	0.48858	1
FBgn0010397	LamC	9.65149	0.156916	0.412647	0.703748	1
FBgn0010398	Lrr47	7.69412	-0.0282166	0.473854	0.952516	1
FBgn0010399	Nmdar1	3.63194	0.0168802	1.14393	0.988227	1
FBgn0010401	Os-C	5.1752	0.0903788	0.362917	0.803334	1
FBgn0010406	RNaseX25	9.71149	-0.0132486	0.306349	0.965505	1
FBgn0010407	Ror	4.06418	-0.2979	0.884278	0.736203	1
FBgn0010408	RpS9	15.0509	-0.110336	0.228339	0.628947	1
FBgn0010409	RpL18A	15.173	0.0247667	0.220269	0.910476	1
FBgn0010411	RpS18	14.7508	-0.042979	0.161202	0.789765	1
FBgn0010412	RpS19a	15.1795	-0.0435952	0.259137	0.866401	1
FBgn0010414	SerT	4.86955	-0.11529	0.591537	0.845473	1
FBgn0010415	Sdc	12.8101	-0.0629954	0.125527	0.615775	1
FBgn0010416	TH1	10.2703	0.0439305	0.309071	0.886972	1
FBgn0010417	Taf6	10.1553	0.0364978	0.108622	0.736866	1
FBgn0010421	TfIIFbeta	9.32538	0.0430813	0.182823	0.813708	1
FBgn0010422	TfIIS	10.8827	0.0909241	0.11741	0.438686	1
FBgn0010423	TpnC47D	0.719513	1.19844	1.80299	0.506244	1
FBgn0010424	TpnC73F	5.66479	1.20374	0.647808	0.0631452	1
FBgn0010431	mtrm	0.892513	-0.251682	0.886643	0.776518	1
FBgn0010433	ato	3.02769	0.112217	0.491324	0.819338	1
FBgn0010434	cora	13.392	0.077502	0.132436	0.55841	1
FBgn0010435	emp	12.0737	-0.0758306	0.157764	0.630758	1
FBgn0010438	mtSSB	9.00206	0.137602	0.1387	0.321158	1
FBgn0010441	pll	9.72095	0.0210906	0.122824	0.863662	1
FBgn0010452	trn	11.7074	0.08648	0.155704	0.578613	1
FBgn0010453	Wnt4	9.96617	-0.0545085	0.509474	0.914797	1
FBgn0010470	Fkbp14	11.6363	-0.190393	0.36307	0.600001	1
FBgn0010473	tutl	12.419	0.0880608	0.161926	0.586556	1
FBgn0010482	l(2)01289	2.89494	1.54622	0.989481	0.118132	1
FBgn0010488	NAT1	14.1282	-0.0341875	0.184091	0.852673	1
FBgn0010497	dmGlut	8.06016	-0.0138278	0.141749	0.922289	1
FBgn0010501	Dcp-1	10.6908	0.0698207	0.161067	0.664661	1
FBgn0010504	kermit	9.5831	-0.0319342	0.129886	0.805788	1
FBgn0010516	wal	10.6406	-0.0433668	0.11929	0.716201	1
FBgn0010520	Bka	8.19806	-0.0840515	0.113444	0.458749	1
FBgn0010531	Ccs	8.30213	0.0438038	0.215447	0.838888	1
FBgn0010548	Aldh-III	11.4863	-0.0453492	0.106956	0.671566	1
FBgn0010549	l(2)03659	6.5055	0.0228722	0.34954	0.947827	1
FBgn0010551	Phb2	11.9011	-0.030404	0.0936965	0.745564	1
FBgn0010583	dock	10.2146	0.0504293	0.149884	0.736527	1
FBgn0010590	Prosbeta1	11.6749	-0.00554427	0.339707	0.986979	1
FBgn0010591	Sply	9.87556	-0.0414885	0.0995023	0.676708	1
FBgn0010602	lwr	12.7045	-0.00701922	0.272192	0.979427	1
FBgn0010607	l(2)05714	8.6909	0.0487332	0.464407	0.916426	1
FBgn0010611	Hmgs	9.81063	0.0377967	0.120661	0.754094	1
FBgn0010612	ATPsynG	11.7052	0.0936738	0.325239	0.773335	1
FBgn0010620	CG10939	11.8716	0.160358	0.194188	0.408927	1
FBgn0010621	CCT5	12.7858	0.0272743	0.154501	0.859876	1
FBgn0010622	DCTN3-p24	9.51392	-0.0557251	0.324479	0.863644	1
FBgn0010638	Sec61beta	12.7067	-0.0425504	0.341816	0.900933	1
FBgn0010651	MFS14	9.32533	-0.122844	0.200037	0.539144	1
FBgn0010660	Nup214	11.1625	0.0579396	0.180673	0.748447	1
FBgn0010741	Pfdn2	10.9361	0.00845391	0.337759	0.980031	1
FBgn0010747	Srp54k	11.3648	-0.0374901	0.269722	0.889454	1
FBgn0010750	atms	10.3066	0.037074	0.111848	0.740291	1
FBgn0010762	simj	11.4343	-0.0934721	0.240297	0.697287	1
FBgn0010768	sqz	9.12263	0.0382724	0.20605	0.852646	1
FBgn0010770	ppan	9.09853	0.134255	0.168734	0.42623	1
FBgn0010772	Xe7	12.0145	0.0209744	0.103606	0.839569	1
FBgn0010774	Ref1	12.901	0.109073	0.394628	NA	NA
FBgn0010786	l(3)02640	9.52625	0.0706727	0.12299	0.565548	1
FBgn0010803	TrpRS	9.6448	0.0132212	0.236442	0.955408	1
FBgn0010808	Chchd3	10.0474	0.0420506	0.183199	0.818453	1
FBgn0010812	unc-45	9.56349	-0.0415427	0.208496	0.842068	1
FBgn0010825	Gug	12.5094	-0.011884	0.247477	0.9617	1
FBgn0010830	l(3)04053	9.74755	-0.0640636	0.163308	0.694846	1
FBgn0010877	l(3)05822	10.5601	0.0249177	0.220705	0.910109	1
FBgn0010894	sinu	11.0346	0.0372591	0.120773	0.757698	1
FBgn0010905	Spn	12.1056	-0.211875	0.28894	0.463384	1
FBgn0010909	msn	12.9411	-0.0576902	0.215358	0.788791	1
FBgn0010926	l(3)07882	9.59868	0.0441898	0.113501	0.697029	1
FBgn0011016	SsRbeta	12.3349	-0.026511	0.18471	0.885873	1
FBgn0011020	Sas-4	8.9995	0.166135	0.0995123	0.0950197	1
FBgn0011202	dia	10.421	0.0111158	0.148375	0.940281	1
FBgn0011204	cue	9.61045	0.115699	0.172157	0.50155	1
FBgn0011205	fbl	10.0706	-0.0278394	0.347768	0.936196	1
FBgn0011206	bol	5.42559	0.1163	0.442759	0.792805	1
FBgn0011207	pelo	9.90629	0.114276	0.342079	0.738331	1
FBgn0011211	blw	14.2027	0.0169002	0.248736	0.94583	1
FBgn0011217	eff	13.0676	0.0281778	0.348762	0.935606	1
FBgn0011224	heph	14.2138	0.00095183	0.315804	0.997595	1
FBgn0011225	jar	13.8485	-0.128474	0.229549	0.575698	1
FBgn0011227	ox	9.13027	-0.0111183	0.180762	0.950955	1
FBgn0011230	poe	12.7584	0.00330485	0.350699	0.992481	1
FBgn0011232	scat	9.20223	0.0209369	0.234687	0.928913	1
FBgn0011236	ken	9.22534	0.193503	0.372768	0.603693	1
FBgn0011259	Sema1a	10.0896	-0.107511	0.210193	0.609011	1
FBgn0011260	Sema2a	13.3846	0.0207855	0.206559	0.919846	1
FBgn0011272	RpL13	15.2461	-0.0383301	0.395764	0.922845	1
FBgn0011274	Dif	7.46	-0.0796522	0.307102	0.795352	1
FBgn0011279	Obp69a	2.79605	-0.0413167	0.547088	0.9398	1
FBgn0011280	Obp19d	-0.802312	2.77069	2.96736	0.350446	NA
FBgn0011282	Obp84a	2.72319	0.0874935	0.582777	0.880661	1
FBgn0011283	Obp28a	-0.964894	0	5.20164	1	NA
FBgn0011284	RpS4	15.6467	0.0170727	0.142505	0.904638	1
FBgn0011286	RyR	6.30028	0.0960255	0.496623	0.84668	1
FBgn0011288	Snap25	1.77319	0.594146	1.38353	0.667603	1
FBgn0011289	TfIIA-L	10.7758	0.0100273	0.107842	0.925918	1
FBgn0011290	Taf12	10.3599	0.0701518	0.308453	0.820089	1
FBgn0011291	Taf11	9.07106	-0.0163524	0.288106	0.954738	1
FBgn0011296	l(2)efl	3.99825	1.27172	0.70577	0.0715621	1
FBgn0011297	Alg3	9.69324	-0.0203037	0.199005	0.918736	1
FBgn0011300	babo	12.1521	0.00922003	0.196909	0.962654	1
FBgn0011305	Rsf1	12.0745	0.0211562	0.343697	0.950917	1
FBgn0011327	Uch-L5	10.8868	0.0235678	0.391729	0.952025	1
FBgn0011335	vers	8.62804	-0.0413227	0.308972	0.893606	1
FBgn0011336	Stt3B	11.8751	0.0303627	0.275972	0.912393	1
FBgn0011361	ND-ACP	10.6718	0.00841539	0.249134	0.973054	1
FBgn0011455	ND-SGDH	10.2652	0.0667369	0.362245	0.853832	1
FBgn0011474	PR-Set7	10.4483	0.147833	0.107032	0.167215	1
FBgn0011476	l(3)neo43	6.7437	-0.0340018	0.501789	0.945976	1
FBgn0011481	Ssdp	11.6903	0.0415253	0.364589	0.90932	1
FBgn0011509	SrpRbeta	10.2376	-0.0917027	0.287034	0.74936	1
FBgn0011566	Smyd3	8.66249	-0.0382502	0.169372	0.821329	1
FBgn0011569	can	-1.42208	2.04673	4.76997	0.66786	NA
FBgn0011570	cpb	11.4713	-0.00884745	0.0794869	0.911373	1
FBgn0011573	Cdc37	11.132	0.0569304	0.133159	0.668988	1
FBgn0011576	Cyp4d2	7.03474	-0.487733	0.36496	0.181418	1
FBgn0011581	Ms	-0.652454	0	5.20164	1	NA
FBgn0011582	Dop1R1	0.355867	0	2.39321	1	1
FBgn0011584	Trp1	11.5276	-0.0212808	0.349095	0.951391	1
FBgn0011586	e(r)	10.1432	0.0773655	0.303314	0.798671	1
FBgn0011589	Elk	3.15815	0.192469	0.65563	0.769091	1
FBgn0011591	fng	12.684	0.122727	0.0767157	0.10965	1
FBgn0011592	fra	12.0249	-0.09138	0.323409	0.77752	1
FBgn0011596	fzo	-0.835976	-1.41176	2.72294	0.60413	NA
FBgn0011603	ine	5.41884	-0.590697	0.457032	0.196197	1
FBgn0011604	Iswi	11.7734	0.0559254	0.339499	0.869157	1
FBgn0011606	Klp3A	11.019	0.0668531	0.19141	0.726888	1
FBgn0011638	La	11.6722	0.0397401	0.17345	0.81878	1
FBgn0011640	lark	12.5946	0.0524417	0.305716	0.863801	1
FBgn0011642	Zyx	10.4938	-0.0501661	1.20361	NA	NA
FBgn0011648	Mad	11.3488	0.00199527	0.0844928	0.98116	1
FBgn0011653	mas	12.3462	0.111612	0.115144	0.332384	1
FBgn0011655	Med	11.3935	-0.0107088	0.283033	0.969819	1
FBgn0011656	Mef2	10.2345	-0.0665386	0.199865	0.739196	1
FBgn0011659	Mlh1	7.93612	0.168871	0.428554	0.693545	1
FBgn0011660	Pms2	8.52904	0.044467	0.473767	0.925222	1
FBgn0011661	Moe	13.3109	0.00939107	0.247869	0.969778	1
FBgn0011666	msi	10.6595	-0.00100801	0.296114	0.997284	1
FBgn0011672	Mvl	10.0528	-0.0744587	0.267208	0.78051	1
FBgn0011674	insc	7.8278	-0.403406	0.402466	0.316181	1
FBgn0011676	Nos	-0.0107228	-0.831127	1.50828	0.581605	1
FBgn0011692	pav	10.7655	0.15668	0.194849	0.421332	1
FBgn0011693	Pdh	3.59076	-0.0846409	1.24148	NA	NA
FBgn0011695	EbpIII	8.25954	1.05545	0.518574	0.0418209	1
FBgn0011701	repo	7.05427	-1.10764	0.837451	0.185955	1
FBgn0011703	RnrL	10.894	0.15297	0.403376	0.704521	1
FBgn0011704	RnrS	10.6867	0.170447	0.260037	0.512165	1
FBgn0011705	rost	7.86357	0.0105714	0.326566	0.974176	1
FBgn0011706	rpr	7.53172	0.208695	0.246288	0.396794	1
FBgn0011708	Syx5	9.92008	0.0632122	0.106892	0.554275	1
FBgn0011710	2024-09-01	11.7248	-0.010924	0.127874	0.931921	1
FBgn0011715	Snr1	10.9126	0.152289	0.133901	0.255402	1
FBgn0011722	Tig	7.69254	-0.915818	0.582703	0.116027	1
FBgn0011725	twin	11.0327	-0.121825	0.076475	0.111158	1
FBgn0011726	tsr	13.6643	0.0358611	0.505352	0.943427	1
FBgn0011737	Wee1	9.62738	0.0152745	0.105153	0.884506	1
FBgn0011739	wts	11.1301	-0.11137	0.220522	0.613538	1
FBgn0011740	alpha-Man-IIa	11.1916	0.049691	0.303797	0.870072	1
FBgn0011741	Arp6	10.3608	0.02786	0.0892501	0.754922	1
FBgn0011742	Arp2	11.4378	-0.0456907	0.199477	0.818828	1
FBgn0011745	Arp1	11.4641	0.0306281	0.145707	0.833509	1
FBgn0011746	ana	9.76118	-0.238564	0.451389	0.597145	1
FBgn0011747	Ank	11.8685	-0.00806299	0.78233	0.991777	1
FBgn0011754	PhKgamma	10.6491	-0.0351392	0.103237	0.733576	1
FBgn0011758	B-H1	6.7442	-0.27565	0.390567	0.480332	1
FBgn0011760	ctp	12.7501	-0.03083	0.440291	0.944176	1
FBgn0011762	DNApol-alpha50	7.52841	0.196091	0.46968	0.676314	1
FBgn0011763	Dp	11.6216	0.124864	0.0899604	0.165142	1
FBgn0011766	E2f1	11.9436	0.0392274	0.282609	0.889605	1
FBgn0011768	Fdh	11.6942	0.329997	0.278526	0.236097	1
FBgn0011769	Fdx1	7.14118	-0.039842	0.407498	0.922113	1
FBgn0011770	Gip	9.84772	-0.258603	0.254518	0.309606	1
FBgn0011771	Hem	10.6503	0.0440338	0.456823	0.92321	1
FBgn0011774	Irbp	7.76181	0.334222	0.333062	0.315628	1
FBgn0011785	BRWD3	11.8602	0.0476757	0.177672	0.788441	1
FBgn0011787	mRpL12	9.99041	0.121335	0.364447	0.739188	1
FBgn0011802	Gem3	8.7461	0.120085	0.661206	0.855885	1
FBgn0011817	nmo	11.3295	-0.166689	0.234561	0.477305	1
FBgn0011818	oaf	9.24625	0.0804831	0.252577	0.749994	1
FBgn0011824	CG4038	10.8614	0.0147107	0.439258	NA	NA
FBgn0011826	Pp2B-14D	10.6723	-0.0205844	0.16212	0.898964	1
FBgn0011828	Pxn	10.0243	0.086975	0.270596	0.747892	1
FBgn0011829	Ret	7.45989	0.11712	0.362905	0.7469	1
FBgn0011836	Taf2	9.92271	0.00375493	0.334054	0.991032	1
FBgn0011837	Tis11	10.2803	-0.0544888	0.301586	0.856623	1
FBgn0011916	tRNA:Met-CAT-1-2	-0.0998016	2.46135	1.94923	0.206686	NA
FBgn0012034	AcCoAS	6.79158	-0.950179	0.524787	0.0702029	1
FBgn0012036	Aldh	10.914	-0.0205007	0.509989	0.967935	1
FBgn0012037	Ance	12.7189	0.0532122	0.365188	0.884149	1
FBgn0012042	AttA	3.4634	0.0295876	1.03474	0.977188	1
FBgn0012051	CalpA	10.256	0.0232464	0.45764	0.959488	1
FBgn0012058	Cdc27	10.5483	0.00960829	0.134847	0.943196	1
FBgn0013263	Trl	7.26052	0.076631	0.548576	0.888904	1
FBgn0013269	Fkbp39	12.2905	0.101753	0.182534	0.577223	1
FBgn0013272	Gp150	14.2053	-0.0171619	0.251345	0.945563	1
FBgn0013275	Hsp70Aa	3.8364	-1.3989	1.30288	0.282958	1
FBgn0013276	Hsp70Ab	4.95386	-1.66588	1.0591	0.115737	1
FBgn0013277	Hsp70Ba	1.447	-1.71992	1.70144	0.312082	1
FBgn0013278	Hsp70Bb	5.70717	-1.69146	2.17439	0.436626	1
FBgn0013279	Hsp70Bc	5.73255	-0.195336	1.22726	0.87354	1
FBgn0013303	Nca	9.25523	-0.0211493	1.06281	0.984124	1
FBgn0013305	Nmda1	10.1002	0.0174336	0.222573	0.937568	1
FBgn0013307	Odc1	3.04462	-3.53648	1.59164	0.0262899	0.816656
FBgn0013308	Odc2	0.138983	-3.08259	2.363	0.192055	1
FBgn0013323	Ptth	2.44737	-1.85765	1.06126	0.0800467	1
FBgn0013325	RpL11	14.9778	-0.0273116	0.223104	0.902569	1
FBgn0013334	Sap47	10.5934	0.0258913	0.271257	0.923958	1
FBgn0013342	nSyb	6.72785	-0.761609	0.772049	0.323899	1
FBgn0013343	Syx1A	9.29892	-0.0517986	0.287882	0.857208	1
FBgn0013347	TfIIA-S	10.8663	-0.0182448	0.258826	0.943803	1
FBgn0013348	TpnC41C	-0.981032	-0.975957	2.08695	0.640037	NA
FBgn0013432	bcn92	8.9905	-0.0574845	0.178684	0.747672	1
FBgn0013433	beat-Ia	1.09767	-2.01168	1.64704	0.221939	1
FBgn0013435	Cdc2rk	8.89076	0.103395	0.152248	0.497059	1
FBgn0013467	igl	4.85725	-0.772096	1.06156	0.467031	1
FBgn0013469	klu	11.1694	-0.0642215	0.30152	0.831333	1
FBgn0013531	MED20	8.37333	0.0878548	0.117689	0.455367	1
FBgn0013548	l(2)dtl	9.04018	0.238676	0.368482	0.517161	1
FBgn0013563	Pex1	8.02789	-0.00801313	0.309095	0.979318	1
FBgn0013576	mtd	11.5598	0.0499445	0.193067	0.795874	1
FBgn0013672	NA	13.3192	0.155413	0.87915	NA	NA
FBgn0013673	NA	1.10955	0.82178	1.77749	0.643847	1
FBgn0013674	NA	15.8107	0.0286143	0.93105	NA	NA
FBgn0013675	NA	14.0796	-0.010673	0.927321	NA	NA
FBgn0013676	NA	15.3695	0.0209073	0.92928	NA	NA
FBgn0013678	NA	14.4362	0.0411851	0.92747	NA	NA
FBgn0013679	NA	13.0853	0.15082	0.914916	NA	NA
FBgn0013680	NA	6.76888	0.090311	0.910523	NA	NA
FBgn0013681	NA	11.898	0.154314	1.11068	NA	NA
FBgn0013683	NA	2.35907	-0.0137836	0.657361	0.983271	1
FBgn0013684	NA	12.5665	0.14185	0.91182	0.876373	1
FBgn0013685	NA	3.8801	0.782513	1.02396	0.444747	1
FBgn0013686	NA	18.4289	-0.0204907	0.959683	NA	NA
FBgn0013688	NA	6.85865	-0.292159	0.923336	0.751686	1
FBgn0013689	NA	2.55786	-0.482753	0.533971	0.365953	1
FBgn0013690	NA	-1.43205	-1.47251	5.12867	0.774025	NA
FBgn0013694	NA	1.57301	2.06651	0.945306	0.0288099	0.859402
FBgn0013699	NA	1.91747	0.665771	0.972093	0.493417	1
FBgn0013704	NA	-0.43472	1.10447	3.58431	0.757975	NA
FBgn0013709	NA	0.575222	0.695699	2.91256	0.811213	1
FBgn0013710	NA	0.519122	-1.92125	1.33313	0.14954	1
FBgn0013717	not	10.8899	-0.134913	0.222869	0.544949	1
FBgn0013718	nuf	11.1778	-0.00425277	0.161359	0.978973	1
FBgn0013720	pck	11.7391	0.0760415	0.135451	0.574529	1
FBgn0013725	phyl	5.35947	-0.361987	0.40624	0.372893	1
FBgn0013726	pnut	12.0709	0.0103472	0.187341	0.955954	1
FBgn0013732	sced	9.15684	0.0378908	0.101763	0.709636	1
FBgn0013733	shot	13.1372	0.0103259	0.229779	0.964156	1
FBgn0013746	alien	10.5383	0.0551816	0.848839	0.948167	1
FBgn0013749	Arf102F	10.3919	0.00230343	1.15379	0.998407	1
FBgn0013750	Arf51F	10.4054	0.0393035	0.319492	0.902092	1
FBgn0013751	Awh	5.31631	-0.337206	0.589742	0.567467	1
FBgn0013753	Bgb	10.6774	0.0476664	0.230621	0.836254	1
FBgn0013756	Mtor	12.3323	0.071578	0.173547	0.680015	1
FBgn0013759	CASK	10.6757	0.00484501	0.184166	0.979012	1
FBgn0013762	Cdk5	8.69083	-0.102055	0.165973	0.538628	1
FBgn0013763	Idgf6	10.0087	-0.630406	0.562549	0.262448	1
FBgn0013764	Chi	10.9256	0.0334878	0.276798	0.903704	1
FBgn0013765	cnn	10.0434	0.0161191	0.154501	0.916907	1
FBgn0013767	Crz	-0.765384	-1.43942	2.79294	0.606289	NA
FBgn0013770	Cp1	12.6015	0.0421098	0.134772	0.754697	1
FBgn0013771	Cyp6a9	3.42069	-3.21221	1.50062	0.0323076	0.930596
FBgn0013772	Cyp6a8	5.10423	-4.33022	1.94504	0.0259952	0.813322
FBgn0013773	Cyp6a22	2.8326	-3.8938	1.61864	0.0161459	0.62197
FBgn0013799	Deaf1	10.4205	-0.0644883	0.190251	0.734637	1
FBgn0013810	Dhc36C	3.52385	-0.577714	0.937111	0.537575	1
FBgn0013811	Dhc62B	5.38816	-0.375428	0.315808	0.234524	1
FBgn0013812	Dhc93AB	6.98144	0.481869	0.379963	0.204727	1
FBgn0013813	Dhc98D	3.07476	1.23947	1.0715	0.24737	1
FBgn0013949	Elal	4.97828	-2.57582	1.3352	0.0537109	1
FBgn0013953	Esp	3.26439	0.950242	0.501853	0.0582957	1
FBgn0013954	Fkbp12	13.4392	0.034985	0.296295	0.906008	1
FBgn0013972	Gycalpha99B	3.45335	-2.0116	1.07372	0.0610008	1
FBgn0013973	Gycbeta100B	1.35161	0.594491	1.44694	0.681174	1
FBgn0013981	His4r	13.9005	-0.0250007	0.116741	0.830426	1
FBgn0013983	imd	9.03867	-0.0478629	0.268679	0.858612	1
FBgn0013987	MAPk-Ak2	11.5764	-0.00128885	0.181396	0.994331	1
FBgn0013995	Calx	2.5558	-0.844145	0.963103	0.380766	1
FBgn0013997	Nrx-IV	12.6753	-0.0180622	0.324152	0.955564	1
FBgn0014000	Hf	5.03626	-2.70295	1.04128	0.00943757	0.454674
FBgn0014006	Ask1	10.864	0.0306236	0.164632	0.852435	1
FBgn0014007	Ptp69D	10.0604	0.0595343	0.501452	0.905494	1
FBgn0014009	Rab2	10.7184	0.00185047	0.162247	0.9909	1
FBgn0014010	Rab5	11.9368	0.0177235	0.227669	0.937949	1
FBgn0014011	Rac2	10.7185	0.0324369	0.119341	0.785777	1
FBgn0014018	Rel	10.1082	-0.055875	0.396391	0.887902	1
FBgn0014019	Rh5	4.71682	0.281381	0.488848	0.564886	1
FBgn0014020	Rho1	12.8344	0.0863151	0.300953	0.774261	1
FBgn0014022	Rlb1	8.17437	0.251832	0.177008	0.15482	1
FBgn0014023	mRpL47	9.15096	0.0881844	0.280397	0.753142	1
FBgn0014024	Rnp4F	10.7435	0.0849845	0.120749	0.481551	1
FBgn0014026	RpL7A	15.7353	0.00230089	0.214552	0.991444	1
FBgn0014028	SdhB	10.8597	0.00680678	0.334038	0.983742	1
FBgn0014029	2024-09-02	11.2584	-0.0280677	0.0989693	0.776717	1
FBgn0014031	Spat	5.33694	-3.53881	1.20947	0.00343454	0.232269
FBgn0014032	Sptr	8.96012	0.00342699	0.163746	0.983303	1
FBgn0014033	Sr-CI	7.57412	0.261658	0.396376	0.509174	1
FBgn0014037	Su(Tpl)	11.575	-0.0593123	0.197799	0.764283	1
FBgn0014073	Tie	9.32574	0.14065	0.243001	0.562722	1
FBgn0014075	Uggt	11.7653	-0.0118697	0.373245	0.974631	1
FBgn0014076	Vm32E	0.522857	-1.80724	1.84783	0.328058	1
FBgn0014092	CG4278	9.14156	-0.0459273	0.275225	0.867471	1
FBgn0014127	barr	10.9751	0.166998	0.12601	0.185079	1
FBgn0014133	bif	12.9161	-0.0524417	0.239296	0.826534	1
FBgn0014135	bnl	6.22447	-0.139768	0.227533	0.539034	1
FBgn0014141	cher	12.1647	0.062325	0.208201	0.764673	1
FBgn0014163	fax	14.6815	-0.0235439	0.237771	0.921123	1
FBgn0014179	gcm	3.76148	0.77391	1.13609	0.495741	1
FBgn0014184	Oda	13.5175	-0.00602598	0.233689	0.979428	1
FBgn0014189	Hel25E	12.726	0.0645458	0.087001	0.458149	1
FBgn0014269	prod	10.0994	0.0956442	0.166572	0.565837	1
FBgn0014340	mof	8.60016	0.120622	0.173609	0.487186	1
FBgn0014342	mia	7.7139	0.208447	0.175923	0.236065	1
FBgn0014343	mirr	11.2962	0.0554262	0.271637	0.838318	1
FBgn0014366	noi	10.3396	0.0850277	0.185143	0.646051	1
FBgn0014368	nol	-0.809741	0.039992	3.13229	0.989813	NA
FBgn0014380	RhoL	9.26593	0.285834	0.288051	0.321048	1
FBgn0014388	sty	10.9912	0.0264515	0.297693	0.929197	1
FBgn0014391	sun	11.0715	-0.0247039	0.184387	0.89342	1
FBgn0014395	tilB	3.62095	-0.929521	0.662196	0.16041	1
FBgn0014396	tim	3.24582	-0.66358	0.935058	0.47791	1
FBgn0014411	Vps26	10.8387	0.0304851	0.128379	0.812298	1
FBgn0014417	CG13397	6.20793	-0.347556	0.356662	0.329825	1
FBgn0014427	CG11899	11.702	-0.102832	0.273453	0.706881	1
FBgn0014454	Acp1	2.91867	0	1.62838	1	1
FBgn0014455	Ahcy	11.5042	0.0192684	0.198324	0.922602	1
FBgn0014464	Cp7Fa	-0.968381	0.0627114	3.84786	0.986997	NA
FBgn0014466	Cp7Fc	-0.462913	0	4.39042	1	NA
FBgn0014469	Cyp4e2	9.63512	-0.406339	0.566988	0.473583	1
FBgn0014850	Eig71Ej	0.315659	-0.700739	3.02193	0.816627	1
FBgn0014857	His3.3A	11.7945	0.106946	0.38363	0.780418	1
FBgn0014859	Hr38	2.84232	0.228469	0.625847	0.71507	1
FBgn0014861	Mcm2	10.3315	0.152821	0.191136	0.423978	1
FBgn0014863	Mlp84B	3.62541	1.70106	0.707074	0.0161383	0.62197
FBgn0014868	Ost48	12.6566	-0.0656645	0.194645	0.735849	1
FBgn0014869	Pglym78	10.1794	0.0739796	0.226583	0.744046	1
FBgn0014870	Psi	12.1094	0.102638	0.267488	0.701193	1
FBgn0014877	Roe1	8.83684	0.0364595	0.220549	0.868698	1
FBgn0014879	Set	11.9894	0.0854415	0.238351	0.719993	1
FBgn0014903	CG14630	-0.952634	0.473753	1.97472	0.810401	NA
FBgn0014906	Hydr2	9.43128	0.00651167	0.280692	0.981492	1
FBgn0014930	CG2846	8.70569	0.0406199	0.123082	0.741382	1
FBgn0014931	CG2678	3.35724	0.200873	0.42259	0.634546	1
FBgn0014949	btn	1.45917	-0.475818	1.02477	0.64242	1
FBgn0015000	betaggt-I	9.06203	0.0341294	0.0956277	0.721168	1
FBgn0015001	iotaTry	-1.09433	1.44297	3.82984	0.706345	NA
FBgn0015008	Actn3	-1.47355	-0.0383172	3.08558	0.990092	NA
FBgn0015010	Ag5r	3.16954	-0.0395593	0.70667	0.955358	1
FBgn0015011	AhcyL2	5.3806	-0.393192	0.298994	0.188492	1
FBgn0015019	CCT3	12.6938	-0.0174434	0.188975	0.926456	1
FBgn0015024	CkIalpha	12.5872	-0.0129371	0.13504	0.923678	1
FBgn0015025	CkIIalpha-i1	6.69617	0.234205	0.470956	0.61898	1
FBgn0015031	cype	11.0431	0.0490556	0.432914	NA	NA
FBgn0015032	Cyp4c3	1.38379	3.92573	4.7766	NA	NA
FBgn0015033	Cyp4d8	3.69963	-2.75326	1.14535	0.0162233	0.62197
FBgn0015034	Cyp4e1	3.37652	0.718397	0.971198	0.459481	1
FBgn0015035	Cyp4e3	1.23265	-3.23889	1.62583	0.0463551	1
FBgn0015036	Cyp4ae1	3.70252	0.0482912	0.458666	0.916149	1
FBgn0015037	Cyp4p1	3.16983	-4.50406	1.86138	0.0155315	0.612705
FBgn0015038	Cyp9b1	0.530327	-0.268741	2.92521	0.926801	1
FBgn0015039	Cyp9b2	5.87275	-3.68767	1.44321	0.010613	0.485591
FBgn0015040	Cyp9c1	9.17364	-0.0553438	0.346054	0.872938	1
FBgn0015075	Ddx1	10.3248	0.00743656	0.12848	0.953844	1
FBgn0015218	eIF4E1	12.7894	0.0705596	0.168209	0.674869	1
FBgn0015221	Fer2LCH	12.6504	-0.346251	0.171557	0.043562	1
FBgn0015222	Fer1HCH	12.595	-0.391755	0.0864748	5.89056e-06	0.00229059
FBgn0015229	glec	11.7808	-0.0879647	0.282235	0.75529	1
FBgn0015239	Hr78	12.1798	-0.0936839	0.214199	0.661845	1
FBgn0015240	Hr96	8.56569	0.160599	0.213279	0.45145	1
FBgn0015245	Hsp60A	12.8461	0.0390913	0.255677	0.878482	1
FBgn0015247	Diap2	10.0389	-0.0248131	0.156443	0.873978	1
FBgn0015268	Nap1	12.9085	0.0269723	0.0919298	0.769215	1
FBgn0015269	Nf1	9.92428	-0.0346776	0.395157	0.93007	1
FBgn0015270	Orc2	7.85034	0.18972	0.22979	0.409018	1
FBgn0015271	Orc5	7.93282	0.240999	0.389061	0.535628	1
FBgn0015277	Pi3K59F	9.06094	0.0259109	0.176527	0.883304	1
FBgn0015278	Pi3K68D	10.6686	0.00144786	0.19553	0.994092	1
FBgn0015279	Pi3K92E	10.6769	-0.0076666	0.237016	0.974196	1
FBgn0015282	Rpt2	12.086	0.0190672	0.121259	0.875053	1
FBgn0015283	Rpn10	11.7007	0.0291899	0.165596	0.860081	1
FBgn0015286	Rala	10.0407	-0.0882483	0.216418	0.683444	1
FBgn0015288	RpL22	14.9457	-0.10206	0.34135	0.764947	1
FBgn0015295	Shark	9.98874	-0.0220236	0.142773	0.877408	1
FBgn0015296	Shc	9.89966	0.0755835	0.189485	0.689974	1
FBgn0015298	Srp19	9.43149	0.00516438	0.238646	0.982735	1
FBgn0015299	Ssb-c31a	9.03006	0.111638	0.58441	0.848504	1
FBgn0015316	Try29F	5.30597	0.0663427	0.319408	0.835459	1
FBgn0015320	Ubc2	11.4188	0.0416442	0.431236	NA	NA
FBgn0015321	Ubc4	10.6371	0.0580241	0.14333	0.685604	1
FBgn0015331	abs	9.84231	0.0233505	0.311522	0.940249	1
FBgn0015336	CG15865	0.0582094	0.0206052	2.1582	0.992382	1
FBgn0015338	CG5861	9.85907	0.0113052	0.326652	0.972391	1
FBgn0015351	CG14906	6.77077	0.127144	0.227216	0.575769	1
FBgn0015359	CG2034	9.41648	0.07269	0.177622	0.682364	1
FBgn0015360	oxt	8.5502	0.0471557	0.147879	0.749818	1
FBgn0015371	chn	10.1338	0.0879188	0.24908	0.724108	1
FBgn0015372	RabX1	8.71194	0.100098	0.139048	0.471599	1
FBgn0015376	cutlet	7.91391	0.169412	0.364568	0.642153	1
FBgn0015379	dod	10.6879	0.0721794	0.334283	0.829048	1
FBgn0015380	drl	12.3727	0.0437595	0.167807	0.794267	1
FBgn0015391	glu	10.3853	0.149273	0.24119	0.535981	1
FBgn0015396	jumu	11.087	0.199618	0.219269	0.362621	1
FBgn0015399	kek1	11.1072	-0.0153275	0.229342	0.946715	1
FBgn0015400	kek2	5.4796	-0.834675	0.500617	0.0954562	1
FBgn0015402	ksr	10.2416	-0.0787771	0.191521	0.680836	1
FBgn0015477	Rme-8	11.0357	0.068435	0.301367	0.82036	1
FBgn0015509	Cul1	12.3155	-0.00335682	0.151543	0.982327	1
FBgn0015513	mbc	10.6248	-0.0277518	0.335426	0.934061	1
FBgn0015519	nAChRalpha3	-0.15734	-0.947025	1.3732	0.490415	NA
FBgn0015520	nonA-l	9.39786	-0.160759	0.257851	0.532986	1
FBgn0015521	RpS21	14.3556	-0.157493	0.493129	NA	NA
FBgn0015522	olf186-M	5.56148	-0.354572	0.387088	0.359668	1
FBgn0015527	peng	10.7461	-0.00371283	0.195342	0.984836	1
FBgn0015543	snoRNA:Me28S-A1322	6.23414	0.363003	1.16892	0.756145	1
FBgn0015544	spag	8.61461	0.147198	0.513158	0.774229	1
FBgn0015546	spel1	9.95563	0.0712847	0.275721	0.79599	1
FBgn0015550	tap	-1.03252	0	3.19426	1	NA
FBgn0015553	tos	6.99431	0.24938	0.260318	0.338071	1
FBgn0015558	tty	6.95135	-0.476966	0.286911	0.0964295	1
FBgn0015561	unpg	3.21886	-0.664874	0.670853	0.321643	1
FBgn0015568	alpha-Est1	6.27369	-2.53215	0.857115	0.00313414	0.216066
FBgn0015569	alpha-Est10	6.53086	0.218003	0.626103	0.727698	1
FBgn0015570	alpha-Est2	5.48667	-5.01623	2.311	NA	NA
FBgn0015571	alpha-Est3	7.74749	-0.195661	0.166465	0.23984	1
FBgn0015572	alpha-Est4	5.17664	-2.07981	0.765494	0.00658855	0.362934
FBgn0015575	alpha-Est7	5.54736	-3.52032	1.09497	0.00130452	0.114545
FBgn0015576	alpha-Est8	3.3573	-1.90139	0.817376	0.0200071	0.704977
FBgn0015577	alpha-Est9	3.72637	-0.00926016	0.490921	0.984951	1
FBgn0015582	dare	8.70901	0.0231838	0.142654	0.870899	1
FBgn0015586	Acp76A	-1.32761	-1.5925	3.09039	0.606339	NA
FBgn0015589	Apc	10.5015	0.0192794	0.183641	0.916389	1
FBgn0015591	AstA	1.46122	-0.690216	1.36818	0.613925	1
FBgn0015600	toc	10.605	0.0605241	0.111844	0.588407	1
FBgn0015602	BEAF-32	10.3246	0.124552	0.103297	0.227907	1
FBgn0015609	CadN	11.8536	0.0104775	0.355532	0.97649	1
FBgn0015614	CanB2	10.3832	-0.00675819	0.295615	0.981761	1
FBgn0015615	SMC3	10.5912	0.0313968	0.22739	0.890181	1
FBgn0015618	Cdk8	8.54114	0.0679984	0.337609	0.840377	1
FBgn0015621	Clp	8.53231	0.00898409	0.206434	0.965287	1
FBgn0015622	Cnx99A	12.5813	0.0572254	0.151313	0.705289	1
FBgn0015623	Cpr	11.7457	-0.0680153	0.117882	0.563954	1
FBgn0015625	CycB3	9.93393	0.138524	0.161406	0.390764	1
FBgn0015663	Ugt36A1	6.41076	0.0599525	0.552466	0.913585	1
FBgn0015664	Dref	10.7225	0.109189	0.270163	0.686094	1
FBgn0015714	Cyp6a17	7.10298	-0.378409	0.538275	0.482054	1
FBgn0015721	ktub	4.07682	-1.70248	0.680928	0.0124113	0.534127
FBgn0015737	Hmu	12.9066	0.0150817	0.180802	0.933521	1
FBgn0015754	Lis-1	11.5894	0.0186785	0.103009	0.85611	1
FBgn0015756	RpL9	14.6885	-0.0348159	0.117812	0.767596	1
FBgn0015765	p38a	8.34402	0.00715371	0.405409	0.985922	1
FBgn0015766	Msr-110	13.2557	0.00130937	0.268521	0.996109	1
FBgn0015772	Nak	10.1839	-0.0139112	0.163706	0.93228	1
FBgn0015773	NetA	12.0794	-0.375057	0.538426	0.486065	1
FBgn0015774	NetB	10.454	-0.0984306	0.271973	0.717417	1
FBgn0015776	nrv1	10.4734	0.0578138	0.237628	0.807777	1
FBgn0015777	nrv2	11.5438	0.125127	0.258542	0.628407	1
FBgn0015778	rin	13.6899	0.0881991	0.241495	0.714947	1
FBgn0015781	P5cr	9.08054	0.0831589	0.147039	0.571696	1
FBgn0015789	Rab10	10.5826	0.019473	0.198249	0.921753	1
FBgn0015790	Rab11	12.6039	0.00196784	0.165574	0.990517	1
FBgn0015791	Rab14	9.62527	-0.0102704	0.334715	0.975522	1
FBgn0015793	Rab19	8.3906	0.0807059	0.292046	0.782282	1
FBgn0015794	Rab18	9.18733	0.104204	0.204135	0.609725	1
FBgn0015795	Rab7	11.0729	-0.0737596	0.2705	0.7851	1
FBgn0015797	Rab6	11.3357	-0.00749929	0.231148	0.974118	1
FBgn0015799	Rbf	10.8812	0.0622751	0.145156	0.667906	1
FBgn0015801	Reg-5	8.9328	0.0129761	0.186635	0.94457	1
FBgn0015803	RtGEF	10.1234	-0.0544059	0.207474	0.793144	1
FBgn0015805	HDAC1	12.1312	0.0783262	0.22928	0.732638	1
FBgn0015808	ScpX	10.7827	-0.222004	0.227885	0.329962	1
FBgn0015818	Spx	9.93841	0.0570019	0.213684	0.789656	1
FBgn0015828	TfIIEalpha	9.23591	-0.00590185	0.141318	0.966688	1
FBgn0015829	TfIIEbeta	9.42786	0.104686	0.248904	0.674056	1
FBgn0015831	Rtnl2	1.01451	-0.598043	1.28283	0.64108	1
FBgn0015834	eIF3i	12.6732	0.038757	0.31894	0.903281	1
FBgn0015838	Vang	11.8389	0.0420255	0.103238	0.683953	1
FBgn0015872	Drip	8.77659	-0.0661299	0.199611	0.740423	1
FBgn0015903	apt	7.94028	0.1139	0.286782	0.691244	1
FBgn0015904	ara	11.3597	-0.0456923	0.149241	0.759479	1
FBgn0015905	ast	8.91399	-0.0878978	0.164565	0.593258	1
FBgn0015919	caup	11.2857	0.0130822	0.219867	0.952554	1
FBgn0015924	crq	9.5492	-0.0521537	0.458944	0.909524	1
FBgn0015925	csul	8.91927	0.0770759	0.362788	0.831753	1
FBgn0015926	dah	8.61879	0.0981512	0.299907	0.743462	1
FBgn0015929	dpa	10.5909	0.206885	0.201189	0.303803	1
FBgn0015946	grim	0.165358	-1.41649	1.80105	0.431588	1
FBgn0015949	hrg	11.9426	0.0758071	0.194352	0.6965	1
FBgn0016013	Faa	7.32122	-0.0294251	0.473521	0.95045	1
FBgn0016032	lbm	4.6062	0.000940839	0.381352	0.998032	1
FBgn0016034	mael	3.62162	0.233401	0.456139	0.608869	1
FBgn0016036	mei-P22	1.7044	0.696891	0.772657	0.367088	1
FBgn0016038	Vsp37A	10.1076	-0.0179669	0.258625	0.944615	1
FBgn0016041	Tom40	10.3954	0.114614	0.247837	0.643753	1
FBgn0016047	nompA	10.7065	1.32289	1.32464	0.317949	1
FBgn0016053	pgc	3.16548	0.306242	0.559	0.583802	1
FBgn0016054	phr6-4	7.79001	0.0560753	0.313762	0.858158	1
FBgn0016059	Sema1b	12.8515	-0.0502207	0.13311	0.705961	1
FBgn0016061	side	5.89224	-0.63179	0.709432	0.373167	1
FBgn0016070	smg	9.56959	0.0998599	0.101563	0.325495	1
FBgn0016075	vkg	10.2066	0.0257895	0.318546	0.935474	1
FBgn0016076	vri	9.6148	0.0264899	0.236268	0.91073	1
FBgn0016078	wun	10.2702	0.0867097	0.262971	0.741604	1
FBgn0016081	fry	11.5927	-0.0886322	0.198864	0.65582	1
FBgn0016119	ATPsynCF6	11.2768	-0.0324683	0.183068	0.859228	1
FBgn0016120	ATPsynD	11.9954	0.00239051	0.331259	0.994242	1
FBgn0016122	Acer	6.75537	-0.781985	0.716782	0.275288	1
FBgn0016123	Alp4	0.578612	-0.040349	1.52757	0.978927	1
FBgn0016126	CaMKI	10.9495	-0.163475	1.17089	0.888963	1
FBgn0016131	Cdk4	10.5177	0.103015	0.130824	0.431027	1
FBgn0016641	PTP-ER	9.87628	0.020454	0.223472	0.927073	1
FBgn0016650	Lgr1	1.16248	0	1.60146	1	1
FBgn0016660	H15	4.96375	-1.46862	1.17327	0.210667	1
FBgn0016672	Ipp	9.17083	-0.0106178	0.149729	0.943466	1
FBgn0016675	Lectin-galC1	-0.816371	0.741949	3.14422	0.813454	NA
FBgn0016684	NaPi-T	5.35654	-0.392429	0.348946	0.260754	1
FBgn0016685	Nlp	12.9692	0.00232802	0.261868	0.992907	1
FBgn0016687	Nurf-38	11.9859	0.067682	0.202077	0.737677	1
FBgn0016691	ATPsynO	12.1244	0.0504458	0.285623	0.859809	1
FBgn0016693	Past1	11.1155	-0.102936	0.227139	0.650414	1
FBgn0016694	Pdp1	6.94607	0.0785089	0.333344	0.813806	1
FBgn0016696	Pitslre	12.0944	-0.0979872	0.0916582	0.285047	1
FBgn0016697	Prosalpha5	11.2241	0.101059	0.192178	0.598985	1
FBgn0016698	Ptpa	8.91513	0.00222798	0.287067	0.993808	1
FBgn0016701	Rab4	10.2185	-0.0376183	0.3188	0.906068	1
FBgn0016715	Reg-2	6.66885	-1.94487	0.57249	0.000680768	0.0729356
FBgn0016726	RpL29	14.2845	-0.171709	0.164202	0.295693	1
FBgn0016754	sba	10.6889	-0.07068	0.208304	0.734375	1
FBgn0016756	Usp47	12.0184	0.136649	0.132838	0.303628	1
FBgn0016762	angel	7.86311	0.0533495	0.537124	0.920881	1
FBgn0016794	dos	10.4216	-0.0235192	0.195175	0.904085	1
FBgn0016797	fz2	13.1344	-0.0266855	0.235203	0.909668	1
FBgn0016917	Stat92E	11.4524	-0.0822923	0.199557	0.680065	1
FBgn0016919	nompB	4.4182	0	1.57798	1	1
FBgn0016920	nompC	2.62955	-0.700741	1.56654	0.654646	1
FBgn0016926	Pino	10.5206	-0.131896	0.215634	0.540759	1
FBgn0016930	Dyrk2	11.6119	-0.250045	0.343184	0.466244	1
FBgn0016970	l(2)k10201	7.09899	0.246179	0.238927	0.302846	1
FBgn0016977	spen	12.73	-0.020306	0.277005	0.941563	1
FBgn0016978	snRNP-U1-70K	11.3744	0.0533912	0.254065	0.833552	1
FBgn0016983	smid	11.5761	0.0457367	0.316423	0.885072	1
FBgn0016984	sktl	10.8827	-0.0670571	0.14176	0.63619	1
FBgn0017414	cag	8.5139	0.100594	0.427199	0.813841	1
FBgn0017418	ari-1	9.89537	0.0828378	0.139782	0.553436	1
FBgn0017424	asRNA:CR11538	8.31533	-4.1286	1.39903	0.00316692	0.216864
FBgn0017429	CG5989	8.7334	-0.0631982	0.14138	0.654869	1
FBgn0017430	Nelf-E	8.92347	0.0504476	0.229135	0.825742	1
FBgn0017457	U2af38	10.567	0.0391708	0.146816	0.789621	1
FBgn0017482	T3dh	7.38024	-0.267279	0.357372	0.45452	1
FBgn0017545	RpS3A	14.8828	-0.0257094	0.720594	0.971539	1
FBgn0017550	Rga	11.9999	-0.0023683	0.217537	0.991314	1
FBgn0017551	Rca1	9.67572	0.118163	0.145138	0.415563	1
FBgn0017558	Pdk	9.38088	-0.475991	0.252592	0.0595078	1
FBgn0017561	Ork1	0.870732	-1.5284	2.28734	0.504006	1
FBgn0017566	ND-75	11.5409	-0.0134325	0.33323	0.967846	1
FBgn0017567	ND-23	9.83532	0.00637751	0.137346	0.962964	1
FBgn0017572	Mo25	11.2773	0.00716064	0.0891157	0.935957	1
FBgn0017577	Mcm5	10.0955	0.334401	0.262872	0.203335	1
FBgn0017578	Max	9.80717	0.0179329	0.146387	0.9025	1
FBgn0017579	RpL14	15.1806	-0.0510972	0.284355	0.857392	1
FBgn0017581	Lk6	13.3902	0.0581522	0.164594	0.723858	1
FBgn0017590	klg	4.98247	0.193564	0.735533	0.792426	1
FBgn0019624	COX5A	11.4323	0.0549165	0.366501	0.880891	1
FBgn0019637	Atu	10.7538	0.0931396	0.179488	0.603818	1
FBgn0019643	AANAT1	5.12009	-0.138471	0.361382	0.701594	1
FBgn0019644	ATPsynB	12.0105	0.0313692	0.336919	0.925819	1
FBgn0019650	toy	2.40784	-1.11155	1.22962	0.366007	1
FBgn0019660	lncRNA:roX2	4.74966	2.0018	3.81183	0.599476	1
FBgn0019661	lncRNA:roX1	9.25428	1.53567	1.29678	0.236329	1
FBgn0019662	qm	9.38852	0.000139061	0.14697	0.999245	1
FBgn0019686	lok	9.84448	0.122224	0.231838	0.598058	1
FBgn0019809	gcm2	3.18268	-0.56429	1.56657	0.718692	1
FBgn0019830	colt	11.258	-0.0357573	0.200581	0.858512	1
FBgn0019890	Smg5	12.0737	-0.0254352	0.122291	0.835238	1
FBgn0019925	Surf4	11.6461	0.00446219	0.0772938	0.953963	1
FBgn0019932	SamDC	7.92992	0.0180243	1.05846	0.986414	1
FBgn0019936	RpS20	14.6424	-0.0743981	0.139052	0.592624	1
FBgn0019938	RpI1	10.2162	0.0421731	0.359885	0.906714	1
FBgn0019940	Rh6	1.76998	0.758771	1.85682	0.682803	1
FBgn0019949	Cdk9	9.23829	0.0291845	0.209458	0.889187	1
FBgn0019952	Orct	8.25219	-0.336371	0.170732	0.0488196	1
FBgn0019957	ND-42	10.9911	-0.0347987	0.299271	0.907432	1
FBgn0019960	Mitofilin	11.226	-0.0152473	0.221925	0.945225	1
FBgn0019968	Khc-73	11.4436	-0.113246	0.224353	0.613722	1
FBgn0019972	Drice	10.6892	0.0569617	0.165939	0.731395	1
FBgn0019982	Gs1l	8.39914	0.117336	0.269599	0.6634	1
FBgn0019985	mGluR	6.06012	-0.731733	0.684856	0.285319	1
FBgn0019990	Gcn2	10.4576	0.0909415	0.234966	0.698725	1
FBgn0020018	Ppox	8.41533	-0.126468	0.168823	0.453786	1
FBgn0020224	Cbl	10.3606	-0.0531586	0.169267	0.753481	1
FBgn0020235	ATPsyngamma	12.2652	0.0174489	0.218575	0.936372	1
FBgn0020236	ATPCL	12.1515	-0.0261562	0.108516	0.809528	1
FBgn0020238	14-3-3epsilon	14.8579	0.0994391	0.08822	0.25967	1
FBgn0020248	stet	3.89682	2.05346	1.34205	0.125994	1
FBgn0020249	stck	10.3272	0.00418393	0.322032	0.989634	1
FBgn0020251	sfl	9.56224	0.0282638	0.327522	0.931231	1
FBgn0020255	Ran	13.151	0.0854381	0.211638	0.686434	1
FBgn0020257	Ppa	12.0674	0.0571031	0.211849	0.787509	1
FBgn0020258	ppk	4.42851	-0.146975	0.479755	0.759335	1
FBgn0020261	pcm	11.0604	-0.0110012	0.217408	0.959643	1
FBgn0020269	mspo	6.92751	-0.182741	0.398221	0.646311	1
FBgn0020270	mre11	9.88882	0.0137609	0.268635	0.959146	1
FBgn0020272	mst	8.16509	0.0631362	0.171352	0.71253	1
FBgn0020277	lush	1.59704	0.249283	1.01541	0.80607	1
FBgn0020278	loco	10.7381	-0.0396187	0.174474	0.820365	1
FBgn0020279	lig	14.1557	0.0414648	0.265007	0.875665	1
FBgn0020294	ko	11.4489	0.0311437	0.195087	0.873164	1
FBgn0020299	stumps	9.0467	-0.00194804	0.179604	0.991346	1
FBgn0020300	geko	8.80151	-0.0911934	0.411381	0.824566	1
FBgn0020304	drongo	11.5778	-0.1111	0.241617	0.645647	1
FBgn0020305	dbe	9.64867	0.111287	0.113811	0.328162	1
FBgn0020306	dom	12.854	-0.0174576	0.163232	0.914829	1
FBgn0020307	dve	9.56422	0.0982782	0.249178	0.693279	1
FBgn0020309	crol	13.5313	0.0919689	0.20397	0.652066	1
FBgn0020312	Tmtc3	10.6298	-0.0214674	0.145157	0.882429	1
FBgn0020369	Rpt6	11.8961	-0.00991906	0.109645	0.927918	1
FBgn0020370	TppII	12.1506	-0.0429527	0.153405	0.779481	1
FBgn0020372	TM4SF	5.47278	-0.0562369	0.610628	0.926621	1
FBgn0020376	Sr-CIII	1.48576	-0.0975652	1.20711	0.935581	1
FBgn0020378	Sp1	7.3009	-1.54084	0.979384	0.115654	1
FBgn0020379	Rfx	8.53052	-0.0533149	0.227471	0.814689	1
FBgn0020381	Dredd	10.2144	-0.0197512	0.367131	0.957095	1
FBgn0020385	pug	11.0183	-0.929421	0.196796	2.32653e-06	0.00105547
FBgn0020386	Pdk1	11.1775	-0.0803454	0.198876	0.686214	1
FBgn0020388	Gcn5	10.4456	0.0467974	0.188351	0.80378	1
FBgn0020389	Papss	11.5453	-0.159019	0.242278	0.511601	1
FBgn0020391	Nrk	6.99074	0.068749	0.199588	0.730505	1
FBgn0020392	Nmt	10.7482	0.0868882	0.369111	0.8139	1
FBgn0020399	Mst89B	2.61707	0.100319	0.485307	0.836234	1
FBgn0020407	asun	8.19139	0.088617	0.14074	0.528924	1
FBgn0020412	JIL-1	10.4964	-0.00969382	0.168245	0.954054	1
FBgn0020414	Idgf3	7.87409	0.662311	0.732632	0.365986	1
FBgn0020415	Idgf2	6.47276	-0.840353	0.690106	0.223332	1
FBgn0020416	Idgf1	6.00701	-0.790767	0.497102	0.111665	1
FBgn0020429	GluRIIB	0.548764	0.741951	2.08137	0.721487	1
FBgn0020440	Fak	9.85314	-0.00453054	0.479394	0.99246	1
FBgn0020443	eRF3	12.419	-0.0118275	0.169282	0.944298	1
FBgn0020445	E23	7.96219	-0.465059	0.505269	0.357353	1
FBgn0020493	Dad	11.0311	-0.0609179	0.159021	0.70166	1
FBgn0020496	CtBP	13.5618	0.135391	0.26937	0.615231	1
FBgn0020497	emb	11.8548	0.076069	0.370001	0.83711	1
FBgn0020503	CLIP-190	9.80697	0.0854222	0.33125	0.7965	1
FBgn0020508	Ag5r2	0.505903	2.24274	1.57091	0.153387	1
FBgn0020510	Abi	10.645	0.0569011	0.237368	0.810549	1
FBgn0020513	Paics	11.1927	-0.258609	0.120225	0.0314731	0.913812
FBgn0020518	snoRNA:Me28S-G764	-0.876259	0.0120336	2.53892	0.996218	NA
FBgn0020521	pio	14.4379	-0.162969	0.318647	0.609042	1
FBgn0020545	kraken	9.11365	-0.0417254	0.235847	0.859573	1
FBgn0020616	SA	10.5	0.0997099	0.336711	0.767132	1
FBgn0020617	Rx	4.40631	1.46645	1.55757	0.346451	1
FBgn0020618	Rack1	15.5262	-0.0264157	0.202893	0.896412	1
FBgn0020620	RN-tre	10.3379	-0.0166555	0.125493	0.894415	1
FBgn0020621	Pkn	11.9531	-0.0474131	0.196374	0.809212	1
FBgn0020622	Pi3K21B	10.3737	-0.00649536	0.270675	0.980855	1
FBgn0020626	Osbp	10.5716	-0.0227051	0.193711	0.906693	1
FBgn0020633	Mcm7	10.6016	0.178683	0.217988	0.412391	1
FBgn0020637	Lcp65Ag2	3.30582	0.533269	1.20578	0.658302	1
FBgn0020638	Lcp65Ag1	-0.124769	1.44582	3.00105	0.629969	NA
FBgn0020639	Lcp65Af	0.552844	0.372438	1.87677	0.842696	1
FBgn0020641	Lcp65Ad	1.60538	0.242746	0.833142	0.770775	1
FBgn0020642	Lcp65Ac	0.937418	-2.77709	4.85792	NA	NA
FBgn0020647	KrT95D	11.2324	-0.098623	0.236788	0.677041	1
FBgn0020653	Trxr-1	13.1518	0.0176691	0.30291	0.953485	1
FBgn0020655	ArfGAP1	10.7567	-0.0714627	0.151978	0.638199	1
FBgn0020660	eIF4B	9.64916	0.006768	0.973077	NA	NA
FBgn0020762	Atet	10.1387	-0.243392	0.434472	0.575342	1
FBgn0020764	Alas	9.95316	-0.023304	0.151813	0.878	1
FBgn0020765	Acp65Aa	5.04101	0	1.62142	1	1
FBgn0020767	Spred	10.9207	0.021214	0.239016	0.929276	1
FBgn0020880	CG7179	0.531667	-1.18336	1.81754	0.514995	1
FBgn0020887	Su(z)12	10.3052	0.0379631	0.134526	0.777791	1
FBgn0020906	Jon25Bi	1.37532	-2.23277	1.89346	0.238318	1
FBgn0020908	Scp1	-0.343765	-0.00920572	1.73871	0.995776	NA
FBgn0020909	Rtc1	8.87722	0.0191952	0.248868	0.93852	1
FBgn0020910	RpL3	16.3586	0.0145533	0.214711	0.94596	1
FBgn0020912	Ptx1	-0.786719	2.3871	3.77781	0.527468	NA
FBgn0020930	Dgkepsilon	9.43588	-0.0586663	0.176242	0.73923	1
FBgn0021738	Crg-1	-0.210948	0.0325096	2.93907	0.991175	NA
FBgn0021742	C901	2.78713	1.72266	1.81775	0.343288	1
FBgn0021750	SerRS-m	8.72191	0.248559	0.11269	0.0274055	0.83583
FBgn0021760	chb	10.943	0.0681606	0.19225	0.722934	1
FBgn0021761	Nup154	10.8941	0.0619484	0.434887	0.886727	1
FBgn0021764	sdk	13.0372	-0.0137241	0.197125	0.944495	1
FBgn0021765	scu	11.6252	-0.157579	0.337804	0.640873	1
FBgn0021767	org-1	1.01402	1.7393	1.48794	0.24243	1
FBgn0021768	nudC	10.5411	0.0898782	0.2147	0.675492	1
FBgn0021776	mira	5.43817	-0.173238	0.551245	0.753319	1
FBgn0021795	Tapdelta	12.7708	-0.0856202	0.279855	0.759647	1
FBgn0021796	Tor	11.0026	0.0796384	0.316816	0.801527	1
FBgn0021800	Reph	9.6482	0.0187012	0.303666	0.950893	1
FBgn0021814	Vps28	9.38972	-0.0943202	0.219537	0.667464	1
FBgn0021825	DCTN2-p50	10.7378	0.0437366	0.181662	0.809743	1
FBgn0021847	Ttc7	9.24556	-0.0887817	0.157478	0.57291	1
FBgn0021856	l(2)k14505	9.20465	0.02699	0.257943	0.916665	1
FBgn0021872	Xbp1	12.9194	-0.114566	0.251625	0.648891	1
FBgn0021874	Nle	9.28947	0.0279349	0.241748	0.908006	1
FBgn0021875	Zfrp8	8.9428	0.103438	0.245182	0.673112	1
FBgn0021895	ytr	11.7425	0.0630685	0.223705	0.777999	1
FBgn0021906	RFeSP	10.9408	-0.00835238	0.392467	0.983021	1
FBgn0021944	Coprox	9.73495	0.0458545	0.256089	0.857893	1
FBgn0021967	ND-PDSW	10.1675	0.014533	0.189525	0.938877	1
FBgn0021979	l(2)k09913	11.9869	-0.0516621	0.190331	0.786058	1
FBgn0021995	Rs1	10.0959	-0.075456	0.128324	0.556524	1
FBgn0022023	eIF3h	12.3703	0.0810842	0.234269	0.729255	1
FBgn0022027	Vps25	8.8842	-0.0656451	0.227555	0.772979	1
FBgn0022029	l(2)k01209	10.2729	0.0226462	0.363719	0.950354	1
FBgn0022069	Nnp-1	10.7834	0.00898556	0.139742	0.948731	1
FBgn0022097	Vha36-1	10.4441	-0.0194601	0.342681	0.954714	1
FBgn0022153	l(2)k05819	10.88	0.0683964	0.254733	0.788313	1
FBgn0022160	Gpo1	6.83499	0.207059	0.390642	0.596078	1
FBgn0022213	Cse1	11.6029	0.0852049	0.480438	0.859235	1
FBgn0022224	ubl	8.78236	0.0802506	0.950261	0.932698	1
FBgn0022238	lolal	11.5793	0.0614515	0.231744	0.790879	1
FBgn0022288	l(2)09851	10.1337	0.0242158	0.240793	0.919894	1
FBgn0022338	dnk	8.68017	-0.131559	0.432654	0.761072	1
FBgn0022343	CG3760	12.025	0.0728371	0.268129	0.785892	1
FBgn0022344	CG10340	9.47209	0.0261458	0.340008	0.938705	1
FBgn0022349	CG1910	12.1633	0.104268	0.129635	0.421211	1
FBgn0022355	Tsf1	15.0655	-1.76121	0.737438	0.0169273	0.642175
FBgn0022359	Sodh-2	5.11755	-0.472144	0.531419	0.374293	1
FBgn0022361	Pur-alpha	10.1648	0.00661074	0.954263	NA	NA
FBgn0022382	Pka-R2	8.66525	-0.0128744	0.297874	0.965525	1
FBgn0022699	D19B	10.3741	-0.00175423	0.194044	0.992787	1
FBgn0022702	Cht2	12.7027	-0.0328902	0.261061	0.899742	1
FBgn0022709	Ak1	6.66405	0.0248242	0.178885	0.88963	1
FBgn0022710	Ac13E	8.02086	-0.218482	0.208889	0.295596	1
FBgn0022724	Taf8	8.4683	0.0441439	0.148766	0.766669	1
FBgn0022764	Sin3A	13.0309	0.0105152	0.261503	0.967925	1
FBgn0022768	Pp2C1	10.4229	-0.0235857	0.208077	0.909753	1
FBgn0022770	Peritrophin-A	4.65021	0.443646	0.541711	0.412803	1
FBgn0022774	Oat	7.84683	-0.700462	0.399473	0.0795224	1
FBgn0022786	Hira	9.1056	0.153663	0.328174	0.639615	1
FBgn0022787	Hel89B	11.3452	0.028552	0.201182	0.887142	1
FBgn0022800	Cad96Ca	8.95837	-1.93004	0.315817	9.88563e-10	2.69087e-06
FBgn0022893	Df31	15.7762	0.0865	0.195926	0.658856	1
FBgn0022935	D19A	10.5833	0.0217006	0.147238	0.882829	1
FBgn0022936	CycH	8.62902	0.070728	0.300142	0.813705	1
FBgn0022942	Cbp80	11.3426	-0.0256661	0.262871	0.92222	1
FBgn0022943	Cbp20	9.44231	0.0419372	0.152066	0.782715	1
FBgn0022959	yps	13.6806	0.0553843	0.295756	0.851454	1
FBgn0022960	vimar	10.5667	0.0305549	0.131566	0.816352	1
FBgn0022981	rpk	7.94741	0.220231	0.346702	0.525287	1
FBgn0022984	qkr58E-3	11.1463	0.016121	0.189103	0.932063	1
FBgn0022985	qkr58E-2	10.4082	0.0698581	0.223116	0.754203	1
FBgn0022986	qkr58E-1	10.8184	0.0258388	0.210572	0.902339	1
FBgn0022987	qkr54B	10.2955	0.026942	0.115929	0.816226	1
FBgn0023000	mth	11.1391	-0.00954367	0.700936	0.989137	1
FBgn0023001	melt	12.0389	0.0745072	0.124144	0.548393	1
FBgn0023023	CRMP	12.4012	-0.0171643	0.302102	0.954691	1
FBgn0023081	gek	10.8404	0.00672901	0.286659	0.981272	1
FBgn0023083	fray	9.99197	-0.0730319	0.252787	0.772653	1
FBgn0023090	dtr	5.46329	-0.101464	0.851415	0.90514	1
FBgn0023094	cyc	10.086	-0.04841	0.150376	0.747508	1
FBgn0023095	caps	10.7556	0.0752446	0.13923	0.588897	1
FBgn0023096	btv	4.86884	0.197965	0.642791	0.7581	1
FBgn0023097	bon	11.6025	0.0426764	0.22768	0.851315	1
FBgn0023129	aay	7.26756	-0.725811	0.279527	0.0094159	0.454674
FBgn0023130	a6	9.30606	0.0588657	0.328798	0.857912	1
FBgn0023143	Uba1	13.7263	0.0646904	0.163724	0.692756	1
FBgn0023167	SmD3	11.1799	0.00266723	0.239569	0.991117	1
FBgn0023169	AMPKalpha	11.2046	0.0116793	0.255551	0.963548	1
FBgn0023170	RpL39	13.4736	-0.128138	1.01071	0.899114	1
FBgn0023171	rnh1	8.62561	-0.0153774	0.152878	0.919879	1
FBgn0023172	RhoGEF2	12.1569	0.00654382	0.205721	0.974624	1
FBgn0023174	Prosbeta2	11.6093	0.0609966	0.354922	0.863548	1
FBgn0023175	Prosalpha7	11.5715	0.03546	0.138348	0.797712	1
FBgn0023177	Pp4-19C	11.5712	0.0128876	0.152047	0.932452	1
FBgn0023179	amon	2.83832	-3.22939	1.39527	0.0206387	0.714343
FBgn0023180	Orc6	6.5873	0.197326	0.314537	0.530427	1
FBgn0023181	Orc4	8.82005	0.0883729	0.307523	0.773829	1
FBgn0023197	Jon74E	-0.788665	-1.29103	3.82131	0.735476	NA
FBgn0023212	EloB	10.9796	0.145787	0.212393	0.49246	1
FBgn0023213	eIF4G1	12.415	0.00962926	0.377193	0.979633	1
FBgn0023214	edl	9.11898	-0.0576115	0.138983	0.678493	1
FBgn0023215	Mnt	10.3529	-0.276565	0.422469	0.512699	1
FBgn0023216	Parg	8.76757	-0.0896439	0.240701	0.709574	1
FBgn0023388	Dap160	10.6863	-0.0356518	0.151002	0.813354	1
FBgn0023395	Chd3	7.03922	0.0746824	0.242704	0.758304	1
FBgn0023407	B4	11.1521	0.0105582	0.113262	0.925729	1
FBgn0023415	Acp32CD	8.21072	1.01842	1.05907	0.33624	1
FBgn0023416	Ac3	8.49146	-0.0583203	0.43582	0.893547	1
FBgn0023441	fus	12.553	0.027303	0.267903	0.918825	1
FBgn0023458	Rbcn-3A	11.8063	0.0388894	0.244888	0.873823	1
FBgn0023477	Taldo	11.6917	0.018547	0.161547	0.908597	1
FBgn0023479	teq	7.33419	-2.41966	0.711824	0.000675742	0.0729356
FBgn0023489	Pph13	0.644125	1.37836	1.71027	0.420283	1
FBgn0023496	Lip1	1.79099	0.495475	0.894148	0.579489	1
FBgn0023506	Es2	8.28022	-0.0531127	0.199552	0.790117	1
FBgn0023507	D2hgdh	6.92172	0.242776	0.433466	0.575425	1
FBgn0023508	Ocrl	10.0348	0.0392468	0.183984	0.83108	1
FBgn0023509	mip130	10.6021	0.0369833	0.184437	0.841074	1
FBgn0023510	Rbcn-3B	9.99205	0.01287	0.164319	0.937571	1
FBgn0023511	Edem1	10.1546	-0.0167481	0.16707	0.920149	1
FBgn0023512	eIF2Bepsilon	9.92462	0.0362364	0.135349	0.78891	1
FBgn0023513	CG14803	8.79567	0.158585	0.191479	0.407552	1
FBgn0023514	CG14805	9.57416	0.0319269	0.085804	0.709825	1
FBgn0023515	CG14814	9.21638	0.164209	0.154019	0.286353	1
FBgn0023516	Pex5	8.89034	-0.119675	0.143714	0.404999	1
FBgn0023517	Pgam5	10.0761	0.111561	0.273584	0.683439	1
FBgn0023518	trr	10.8664	-0.0888642	0.204807	0.664366	1
FBgn0023519	mRpL16	9.16962	0.0125939	0.215948	0.953494	1
FBgn0023520	CG3857	8.76801	-0.0020514	0.248746	0.99342	1
FBgn0023521	CG3587	8.40521	-0.0217957	0.188063	0.907735	1
FBgn0023522	CG11596	9.67484	0.0286656	0.212364	0.892625	1
FBgn0023523	Or2a	3.53442	-0.392507	0.520649	0.450921	1
FBgn0023524	CG3078	3.31727	-2.87543	1.24499	0.0209102	0.714343
FBgn0023525	CG3191	3.65236	-0.465559	0.460975	0.312522	1
FBgn0023526	CG2865	9.57116	0.0764551	0.347108	0.825666	1
FBgn0023527	CG3071	9.07767	-0.0521139	0.276578	0.850544	1
FBgn0023528	CG2924	11.0995	0.0110297	0.260124	0.966179	1
FBgn0023529	CG2918	13.0677	-0.0100797	0.175432	0.954181	1
FBgn0023530	CG3740	7.75231	-0.0306351	0.407857	NA	NA
FBgn0023531	CG32809	8.77965	-0.075218	0.336935	0.823347	1
FBgn0023534	CG17778	3.70728	0.119461	0.549854	0.828006	1
FBgn0023535	arg	6.2259	-1.71911	0.766482	0.0249055	0.796202
FBgn0023536	CG3156	8.04866	0.0178076	0.258101	0.944994	1
FBgn0023537	CG17896	11.7085	0.0412136	0.137712	0.764731	1
FBgn0023540	CG3630	9.48548	0.0768527	0.213613	0.719016	1
FBgn0023541	Cyp4d14	5.49471	0.0452364	0.420039	0.914237	1
FBgn0023542	Nmd3	9.55125	-0.0853931	0.178106	0.631617	1
FBgn0023545	PIG-K	9.53118	-0.0591468	0.190305	0.755953	1
FBgn0023549	Mct1	8.97356	-1.82347	0.482731	0.000158474	0.0250068
FBgn0023550	FarO	1.43163	-1.78368	1.55087	0.250098	1
FBgn0024150	Ac78C	4.00329	-0.297775	0.49666	0.548802	1
FBgn0024179	wit	10.3271	0.0377849	0.153163	0.805142	1
FBgn0024183	vig	11.7647	0.0163129	0.28345	0.954106	1
FBgn0024184	unc-4	4.8817	-2.61209	1.25374	0.0372113	1
FBgn0024187	syd	10.4235	-0.00470517	0.152771	0.97543	1
FBgn0024188	san	9.88548	0.212729	0.2053	0.300117	1
FBgn0024189	sns	10.1228	0.0330785	0.238538	0.889709	1
FBgn0024191	sip1	9.00144	-0.00551011	0.15102	0.970895	1
FBgn0024194	rasp	8.77986	-0.00786793	0.356005	0.982368	1
FBgn0024196	robl	9.65951	-0.0209589	0.503492	0.966796	1
FBgn0024222	IKKbeta	8.57257	0.011904	0.413429	0.977029	1
FBgn0024227	aurB	9.38393	0.0614684	0.442506	0.889521	1
FBgn0024230	Hs2st	8.78534	-0.0230459	0.300983	0.938967	1
FBgn0024232	gprs	3.91326	1.01461	0.502607	0.0435198	1
FBgn0024234	gbb	12.1857	-0.00334114	0.264477	0.989921	1
FBgn0024236	foi	10.2971	0.0404572	0.196934	0.837232	1
FBgn0024238	Fim	11.0056	-0.216888	0.281225	0.440573	1
FBgn0024244	drm	10.1979	-0.00554331	0.413592	0.989306	1
FBgn0024245	dnt	10.3473	-0.0142464	0.301485	0.962311	1
FBgn0024248	chico	9.42736	-0.0861363	0.408344	0.832934	1
FBgn0024249	cato	1.9059	0.194939	0.796835	0.806734	1
FBgn0024250	brk	10.6887	0.0737746	0.10737	0.492017	1
FBgn0024251	bbx	1.44688	1.23374	1.45485	0.396427	1
FBgn0024273	WASp	9.50824	-0.0297741	0.223201	0.89388	1
FBgn0024277	trio	12.004	-0.00833249	0.156138	0.95744	1
FBgn0024285	Srp54	11.6862	0.0398709	0.178727	0.823471	1
FBgn0024288	Sox100B	5.28499	0.0244262	0.271185	0.92823	1
FBgn0024289	Sodh-1	3.90307	-2.01799	2.79032	NA	NA
FBgn0024291	Sirt1	10.9552	0.0263017	0.109324	0.809878	1
FBgn0024293	Spn43Ab	3.63914	-2.7701	1.77204	0.117999	1
FBgn0024294	Spn43Aa	17.3852	-0.279639	0.623689	0.653892	1
FBgn0024314	Plap	11.1319	0.0125406	0.116993	0.914637	1
FBgn0024315	Picot	3.78648	0.831545	0.469129	0.0763066	1
FBgn0024320	Npc1a	10.899	-0.0153365	0.570463	0.978552	1
FBgn0024321	NK7.1	8.4015	0.0441574	0.129916	0.733937	1
FBgn0024326	Mkk4	10.5005	0.002761	0.166943	0.986805	1
FBgn0024329	Mekk1	11.3062	0.0517739	0.20031	0.796045	1
FBgn0024330	MED6	9.34086	-0.00714625	0.265687	0.978542	1
FBgn0024352	Stip1	12.1216	0.100297	0.123372	0.416236	1
FBgn0024360	MTPAP	8.86032	0.0268722	0.241395	0.911362	1
FBgn0024361	Tsp2A	4.01482	-0.65761	0.716871	0.358967	1
FBgn0024362	Naa30A	10.5294	0.0401781	0.12248	0.742883	1
FBgn0024364	CG11417	9.29988	0.108551	0.128976	0.399992	1
FBgn0024365	CG12773	10.7079	0.0113746	0.164907	0.945009	1
FBgn0024366	CG11409	10.8366	-0.179599	0.317187	0.57124	1
FBgn0024371	E2f2	9.40189	-0.066146	0.489004	0.892401	1
FBgn0024432	Dlc90F	10.9673	0.0178687	0.253158	0.943729	1
FBgn0024491	Bin1	9.89528	0.0315641	0.254425	0.901267	1
FBgn0024509	Sec13	11.5211	0.0244371	0.18843	0.896813	1
FBgn0024510	dlt	7.94841	0.0158821	0.271834	0.95341	1
FBgn0024542	Neos	8.98335	0.10674	0.200358	0.594209	1
FBgn0024555	flfl	11.8735	0.068116	0.141246	0.629627	1
FBgn0024556	mEFTu1	11.0531	-0.102283	0.19938	0.607948	1
FBgn0024558	Dph5	10.0612	-0.0134422	0.240683	0.955461	1
FBgn0024689	fws	9.90802	-0.0717213	0.0788282	0.362905	1
FBgn0024698	Cpsf160	9.5879	0.0450443	0.4237	0.915335	1
FBgn0024728	Slip1	10.413	0.0213004	0.994615	NA	NA
FBgn0024732	Drep1	8.06066	0.0530539	0.22207	0.811178	1
FBgn0024733	RpL10	15.0345	-0.00820147	0.705764	0.990728	1
FBgn0024734	PRL-1	7.6582	-0.174217	1.33905	0.896483	1
FBgn0024740	Lip2	0.0276734	-4.79642	5.11046	0.347962	1
FBgn0024754	Flo1	10.9249	-0.0260677	0.26439	0.921459	1
FBgn0024804	Dbp80	10.4129	-0.111205	0.805245	0.890161	1
FBgn0024806	DIP2	10.9893	-0.00929627	0.524373	0.985856	1
FBgn0024807	DIP1	12.8071	0.00882054	0.12183	0.942283	1
FBgn0024811	Crk	10.6599	-0.0137556	0.825611	NA	NA
FBgn0024814	Clc	12.0776	0.0248952	0.159962	0.876323	1
FBgn0024833	AP-1mu	10.7516	0.0253922	0.383366	0.947191	1
FBgn0024836	stan	12.4748	-0.0454243	0.352219	0.897384	1
FBgn0024841	Pcd	9.95236	-0.0342892	0.191137	0.857627	1
FBgn0024846	p38b	9.76116	0.0357852	0.205977	0.862075	1
FBgn0024887	kin17	9.5367	0.0198248	0.275501	0.942634	1
FBgn0024889	Kap-alpha1	10.1288	0.00173371	0.244596	0.994345	1
FBgn0024897	b6	3.97333	-1.05239	0.677299	0.120231	1
FBgn0024909	Taf7	8.42744	0.0334444	0.391201	0.931871	1
FBgn0024912	agt	8.63715	-0.0229523	0.180386	0.898751	1
FBgn0024913	Actbeta	2.61083	0.741952	1.83023	0.685193	1
FBgn0024920	Ts	9.24059	0.230558	0.21516	0.283917	1
FBgn0024921	Tnpo	10.7943	0.0409251	0.205351	0.842034	1
FBgn0024941	RSG7	4.20664	-0.454955	0.808676	0.573713	1
FBgn0024944	Oamb	0.653648	0.632048	1.25135	0.613495	1
FBgn0024945	NitFhit	8.8844	0.132565	0.316885	0.675701	1
FBgn0024947	NTPase	10.5762	-0.0508905	0.118256	0.666947	1
FBgn0024956	Mat1	9.39816	0.0694597	0.239163	0.771488	1
FBgn0024957	Irp-1B	11.3316	-0.0635086	0.208796	0.761001	1
FBgn0024958	Irp-1A	10.3184	-0.0237557	0.34529	0.945149	1
FBgn0024963	GluClalpha	2.76931	1.34241	1.47466	0.362654	1
FBgn0024973	CG2701	10.0968	-0.0688834	0.198536	0.728623	1
FBgn0024975	CG2712	7.74309	0.163907	0.175998	0.351697	1
FBgn0024980	Syx4	2.49323	0.227037	0.65594	0.72925	1
FBgn0024983	CG4293	9.88599	-0.0424142	0.215558	0.844012	1
FBgn0024984	CG3457	1.72676	-0.326804	0.808008	0.685877	1
FBgn0024985	Rilpl	10.5058	-0.0305431	0.187822	0.87082	1
FBgn0024986	CG3719	9.03764	0.0249855	0.170406	0.883429	1
FBgn0024987	ssx	11.2217	0.137031	0.123073	0.265532	1
FBgn0024989	CG3777	10.0948	0.247292	0.24092	0.30468	1
FBgn0024991	CG2694	8.94098	0.30143	0.316982	0.341636	1
FBgn0024992	Spg7	9.01808	0.024799	0.156207	0.87386	1
FBgn0024993	CG2662	7.47985	0.115383	0.179691	0.520796	1
FBgn0024994	Ugalt	9.77592	-0.0566159	0.133982	0.672614	1
FBgn0024995	CG2680	-0.230059	0.450806	1.82047	0.804419	NA
FBgn0024996	eIF2Bbeta	9.74871	0.0196795	0.187827	0.916554	1
FBgn0024997	CG2681	0.76559	-2.26366	1.84294	0.219338	1
FBgn0024998	CG2685	9.24321	0.101118	0.222714	0.649811	1
FBgn0025109	Bem46	8.40189	0.0601198	0.152971	0.694309	1
FBgn0025111	Ant2	6.92667	-0.0605925	0.242302	0.802533	1
FBgn0025185	az2	8.29521	0.171534	0.20614	0.40534	1
FBgn0025186	ari-2	10.5245	-0.067788	0.160928	0.673587	1
FBgn0025334	PHDP	-1.05873	0	4.56275	1	NA
FBgn0025335	Cpes	9.2613	0.0473583	0.324742	0.884053	1
FBgn0025336	CG4882	9.49038	0.01275	0.381242	0.973321	1
FBgn0025352	Mtpbeta	11.9028	-0.0867456	0.20487	0.671991	1
FBgn0025360	Optix	8.93247	-0.0200122	0.227697	0.929964	1
FBgn0025366	Ip259	12.1265	0.0598105	0.235601	0.799601	1
FBgn0025373	Fpps	10.9079	0.0539339	0.196458	0.783676	1
FBgn0025381	rush	10.4888	0.011292	0.262577	0.965698	1
FBgn0025382	Rab27	7.81878	0.072865	0.340373	0.83049	1
FBgn0025383	CG14780	-0.255701	0.0387051	2.18643	0.985876	NA
FBgn0025387	CG12184	2.62361	-0.408039	0.975322	0.675681	1
FBgn0025388	CG12179	9.09423	0.186625	0.177825	0.293953	1
FBgn0025390	Mur2B	8.05926	-0.568719	0.362806	0.116984	1
FBgn0025391	Scgdelta	0.961411	-0.700741	1.73806	0.686821	1
FBgn0025393	CG14795	1.26893	0.3851	1.03689	0.71034	1
FBgn0025394	inc	11.3648	0.0598338	0.179373	0.738703	1
FBgn0025454	Cyp6g1	10.3339	-4.01374	1.29003	0.00186232	0.144835
FBgn0025455	CycT	11.2273	0.0370353	0.193125	0.847923	1
FBgn0025456	CREG	8.91033	1.72759	0.786216	0.0279955	0.845884
FBgn0025457	Bub3	11.2484	0.150081	0.322669	0.641844	1
FBgn0025463	Bap60	12.1451	0.0146904	0.210543	0.944374	1
FBgn0025469	slv	8.90666	-0.0514943	0.120541	0.669239	1
FBgn0025519	fidipidine	9.40262	0.0671661	0.330314	0.838869	1
FBgn0025525	bab2	9.66766	-0.170634	0.336601	0.612201	1
FBgn0025549	unc-119	10.0083	0.00947763	0.266145	0.971593	1
FBgn0025558	CG4101	8.49052	-0.00427057	0.359466	0.990521	1
FBgn0025571	SF1	12.0907	0.0510673	0.259889	0.844221	1
FBgn0025574	Pli	11.0456	-0.0768073	0.1421	0.58884	1
FBgn0025578	Lcp9	3.33088	1.29497	1.12896	0.251362	1
FBgn0025582	eIF3e	12.4348	-0.0145464	0.289431	0.959916	1
FBgn0025592	Gk1	9.00142	0.0148702	0.207092	0.942757	1
FBgn0025595	AkhR	3.76797	-5.84038	1.57413	0.000207063	0.0308836
FBgn0025608	Faf2	10.3553	-0.0112171	0.119688	0.925332	1
FBgn0025613	CG3081	0.402817	0	2.33309	1	1
FBgn0025615	Torsin	10.929	-0.00441148	0.351334	0.989982	1
FBgn0025616	CG13359	-0.4018	2.09099	1.9946	0.29449	NA
FBgn0025620	CG13360	5.9547	-3.26656	1.08703	0.00265555	0.191481
FBgn0025621	CG16989	9.92361	-0.00753817	0.161862	0.962855	1
FBgn0025624	CG4025	8.43527	-0.10236	0.148656	0.491092	1
FBgn0025625	Sik2	6.80357	-0.256061	0.363558	0.481234	1
FBgn0025626	CG4281	10.4346	0.0309398	0.0949433	0.744517	1
FBgn0025627	CG4194	7.25032	0.217216	0.349701	0.534503	1
FBgn0025628	CG4199	11.2929	-0.0083615	0.131868	0.949442	1
FBgn0025629	CG4045	9.17412	-0.0768242	0.143078	0.591309	1
FBgn0025630	Rtca	9.68838	-0.0044612	0.127788	0.972151	1
FBgn0025631	moody	8.50736	0.0165381	0.350783	0.962397	1
FBgn0025632	CG4313	7.31042	0.120492	0.275051	0.661334	1
FBgn0025633	CG13366	11.5616	0.0061157	0.135085	0.96389	1
FBgn0025634	CG13367	9.48309	0.202593	0.249582	0.416945	1
FBgn0025635	CG17829	8.89837	0.00947941	0.130635	0.942153	1
FBgn0025637	SkpA	11.9276	0.0016599	0.335282	0.99605	1
FBgn0025638	Roc1a	11.7317	-0.0179494	0.161126	0.911299	1
FBgn0025639	Hmt4-20	12.0803	-0.0291889	0.158668	0.854043	1
FBgn0025640	CG13369	8.90425	0.0345098	0.346925	0.920762	1
FBgn0025641	DAAM	10.1072	-0.335678	0.427421	0.432244	1
FBgn0025642	CG32812	3.15509	0.407343	0.67379	0.545475	1
FBgn0025643	CG3588	3.61186	-0.174702	0.854353	0.837975	1
FBgn0025644	CG14424	2.25768	0.715272	1.81892	0.694142	1
FBgn0025674	CycK	10.6711	0.0135198	0.139672	0.922887	1
FBgn0025676	CkIIalpha-i3	8.0052	0.0668218	0.197726	0.7354	1
FBgn0025678	CaBP1	12.9085	0.037362	0.132611	0.778141	1
FBgn0025680	cry	6.75807	1.7416	1.2611	0.167276	1
FBgn0025681	CG3558	10.8177	-0.0268551	0.161007	0.867532	1
FBgn0025682	scf	10.8873	-0.0559013	0.136785	0.682773	1
FBgn0025683	CG3164	12.1294	-0.122667	0.262776	0.640635	1
FBgn0025684	MFS18	9.06967	0.0909863	0.336294	0.786733	1
FBgn0025686	Amnionless	1.45784	-1.8951	1.43565	0.186825	1
FBgn0025692	Lfg	2.8909	-0.150759	0.641883	0.814309	1
FBgn0025693	ZnT41F	8.60103	-0.0817862	0.463633	0.859978	1
FBgn0025697	santa-maria	4.30082	-1.39058	1.38669	0.315956	1
FBgn0025700	CG5885	12.3118	-0.0336885	0.21263	0.874112	1
FBgn0025702	Srpk79D	6.14624	-0.265965	0.294266	0.366089	1
FBgn0025709	CNT2	4.27506	0.505436	0.402504	0.209214	1
FBgn0025712	CG13920	5.03357	0.0232007	0.250836	0.926306	1
FBgn0025716	Bap55	10.7302	0.0521522	0.256136	0.838657	1
FBgn0025720	Ate1	10.0405	-0.0902251	0.282721	0.749627	1
FBgn0025724	beta'COP	12.0921	-0.0643307	0.1366	0.637681	1
FBgn0025725	alphaCOP	12.3318	-0.0847421	0.151858	0.57682	1
FBgn0025726	unc-13	12.2692	-0.0957257	0.396263	0.809112	1
FBgn0025739	pon	9.86445	0.0307596	0.131428	0.814952	1
FBgn0025740	PlexB	9.62221	-0.0132681	0.751161	0.985907	1
FBgn0025741	PlexA	11.586	0.0354168	0.954253	NA	NA
FBgn0025742	mtm	10.3418	0.0503425	0.207788	0.808565	1
FBgn0025743	mbt	10.941	0.0421257	0.204145	0.836516	1
FBgn0025777	homer	10.712	-0.046837	0.319525	0.883461	1
FBgn0025781	Cdc16	9.1224	0.00935249	0.489858	0.984768	1
FBgn0025790	TBPH	11.1877	0.108873	0.159063	0.49368	1
FBgn0025800	Smox	11.3408	0.0198273	0.247462	0.93614	1
FBgn0025802	Sbf	9.73368	-0.0680036	0.286712	0.812514	1
FBgn0025807	Rad9	7.79618	0.286286	0.265881	0.281594	1
FBgn0025808	Rad17	7.8253	0.0643428	0.39449	0.870437	1
FBgn0025809	Paf-AHalpha	10.1198	0.110054	0.0908806	0.225904	1
FBgn0025814	Mgstl	10.1975	-0.11034	0.236462	0.640766	1
FBgn0025815	Mcm6	10.63	0.190019	0.182345	0.297373	1
FBgn0025820	JTBR	8.53967	0.0717882	0.236863	0.76183	1
FBgn0025827	CG6421	2.001	0	1.90902	1	1
FBgn0025830	IntS8	9.45826	0.121816	0.206903	0.556021	1
FBgn0025832	Fen1	8.92606	0.109839	0.233259	0.63772	1
FBgn0025833	CG8910	4.69108	0	1.4632	1	1
FBgn0025835	CG17707	8.01273	-0.36519	0.919194	0.691151	1
FBgn0025836	RhoGAP1A	11.7544	0.0397163	0.278642	0.886657	1
FBgn0025837	CG17636	-0.457947	-0.0227459	1.97307	0.990802	NA
FBgn0025839	ND-B14.5A	9.25058	-0.0134601	0.424053	0.974678	1
FBgn0025864	Crag	11.8366	0.00307352	0.19848	0.987645	1
FBgn0025865	Cortactin	11.5639	-0.0700859	0.127389	0.582201	1
FBgn0025866	CalpB	9.68581	-0.00369088	0.167078	0.982376	1
FBgn0025874	Meics	8.63765	0.0220995	0.320263	0.944986	1
FBgn0025878	wrapper	7.34639	-0.140287	0.332261	0.672864	1
FBgn0025879	Timp	7.30964	0.179754	0.393674	0.647955	1
[truncated: 10,012 more rows]

## Sheet: D.DESEQ2_PW_D907_A_vs_C
Extended Data Table 2D | Differential expression analysis (DESeq2) in D907 assimilated vs control in pupal wing.
GENEID	Symbol	log2BaseMean	log2FC	Stderr_log2FC	pvalue	padjust
FBgn0000008	a	12.5082	0.388902	0.20371	0.05625	0.338704
FBgn0000014	abd-A	3.54541	-0.590358	1.13356	0.602505	0.841897
FBgn0000015	Abd-B	0.161474	0.720512	2.39003	0.76306	0.926679
FBgn0000017	Abl	11.4852	0.325752	0.231386	0.159183	0.525591
FBgn0000018	abo	8.16282	-0.296225	0.297004	0.318583	0.669567
FBgn0000022	ac	8.1733	-0.319108	0.587409	0.58696	0.834681
FBgn0000024	Ace	4.50888	-0.315971	0.419296	0.451105	0.75688
FBgn0000028	acj6	2.16252	0.240997	0.736595	0.743534	0.917536
FBgn0000032	Acph-1	8.98686	-0.368936	0.347562	0.288464	0.64756
FBgn0000036	nAChRalpha1	2.0714	1.82818	1.54625	0.237072	0.609756
FBgn0000037	mAChR-A	3.06774	0.349565	0.507881	0.491276	0.78188
FBgn0000038	nAChRbeta1	0.270634	-0.0519159	1.65285	0.974943	1
FBgn0000039	nAChRalpha2	0.514662	-0.109807	2.23652	0.960842	1
FBgn0000042	Act5C	16.1769	0.163246	0.126357	0.196376	0.567521
FBgn0000043	Act42A	14.7455	-0.165908	0.208279	0.425703	0.743341
FBgn0000044	Act57B	8.56161	-0.357941	0.522831	0.493583	0.782982
FBgn0000045	Act79B	2.91455	-0.787633	0.91745	0.390615	0.721191
FBgn0000046	Act87E	9.12651	-0.391459	0.517278	0.449189	0.756095
FBgn0000047	Act88F	7.48719	-1.43216	0.555735	0.00996436	0.202876
FBgn0000052	Pfas	10.7093	0.200517	0.154928	0.195575	0.566603
FBgn0000053	Gart	10.7954	0.0338437	0.227841	0.881916	0.983141
FBgn0000055	Adh	-1.43097	0	5.20139	1	1
FBgn0000057	adp	9.38864	0.259659	0.145819	0.0749623	0.38945
FBgn0000061	al	10.5103	0.682243	0.281053	0.0152051	0.214724
FBgn0000063	Mps1	8.067	-0.341292	0.310235	0.271286	0.638383
FBgn0000064	Ald1	12.216	0.763865	0.298928	0.0106082	0.204585
FBgn0000071	Ama	11.4544	0.200161	0.224775	0.373199	0.708805
FBgn0000075	amd	8.86571	0.278059	0.209652	0.184744	0.554654
FBgn0000077	amx	7.46143	-0.479248	0.316023	0.129393	0.481915
FBgn0000078	Amy-d	0.235729	0.975653	2.41244	0.685899	0.887346
FBgn0000079	Amy-p	0.223185	-2.2339	1.9264	0.246202	0.618878
FBgn0000083	AnxB9	12.028	0.288352	0.187768	0.124616	0.473438
FBgn0000084	AnxB10	8.22781	0.705078	0.312012	0.0238352	0.24932
FBgn0000092	dyw	3.96892	-0.984198	0.449676	0.0286199	0.263259
FBgn0000097	aop	11.9838	0.316562	0.231844	0.172123	0.542025
FBgn0000100	RpLP0	15.4776	0.594937	0.248352	0.0165962	0.22126
FBgn0000108	Appl	9.49263	0.492752	0.283352	0.0820329	0.401409
FBgn0000109	Aprt	7.92934	-0.456714	0.544266	0.401392	0.728795
FBgn0000114	bru1	6.61006	-0.764682	0.555262	0.168464	0.537303
FBgn0000115	Arl1	10.1262	0.139593	0.0951529	0.142366	0.502017
FBgn0000116	Argk	13.4026	-0.128496	0.227923	0.572912	0.825832
FBgn0000117	arm	14.6646	0.229582	0.133468	0.0854079	0.410419
FBgn0000119	arr	12.3442	-0.0776478	0.156229	0.61918	0.850352
FBgn0000120	Arr1	-1.16408	0.995909	2.84842	0.726612	0.909805
FBgn0000121	Arr2	4.10363	-0.39225	0.558776	0.48269	0.776709
FBgn0000137	ase	4.17788	-1.4156	0.900521	0.115956	0.460704
FBgn0000139	ash2	9.72679	-0.201438	0.222729	0.365778	0.70329
FBgn0000140	asp	9.90051	-0.0778415	0.275305	0.777371	0.932088
FBgn0000146	aub	3.32083	-1.12863	0.565486	0.0459496	0.310327
FBgn0000147	aurA	8.68677	-0.180504	0.275568	0.512451	0.792745
FBgn0000150	awd	14.514	0.963535	0.348881	0.00574863	0.20054
FBgn0000152	Axs	9.11858	-0.113369	0.336785	0.736404	0.914097
FBgn0000153	b	4.35572	0.746004	0.731901	0.308075	0.663186
FBgn0000157	Dll	11.0699	0.842271	0.322338	0.00897495	0.20054
FBgn0000158	bam	2.79957	0.251164	0.759532	0.740884	0.916673
FBgn0000163	baz	11.0637	0.541555	0.217524	0.0127873	0.210391
FBgn0000173	ben	12.0376	0.0399641	0.050537	0.429068	0.744756
FBgn0000179	bi	11.1907	0.673333	0.315074	0.0325927	0.274391
FBgn0000180	bib	10.0409	-0.0198937	0.3183	0.950165	1
FBgn0000181	bic	14.2884	0.500769	0.232715	0.0314089	0.270988
FBgn0000183	BicD	11.2121	-0.158528	0.176622	0.369424	0.705645
FBgn0000206	boss	5.24447	-0.0642254	0.386348	0.86797	0.977006
FBgn0000212	brm	12.4185	0.196802	0.136979	0.150794	0.514694
FBgn0000216	Brd	6.98789	-0.873294	0.55066	0.112761	0.456904
FBgn0000221	brn	7.72859	0.380299	0.212721	0.0738104	0.387558
FBgn0000228	Bsg25D	10.0976	0.0513541	0.157694	0.744684	0.917536
FBgn0000229	bsk	9.60373	-0.916355	0.985401	0.352407	0.694255
FBgn0000233	btd	4.62465	0.383792	0.861699	0.656038	0.870788
FBgn0000239	bur	10.8472	-0.417694	0.347993	0.230025	0.601069
FBgn0000241	bw	1.20565	-0.70531	1.0751	0.511798	0.792573
FBgn0000244	by	9.18267	0.248415	0.178213	0.163341	0.529974
FBgn0000246	c(3)G	6.7144	-1.39201	0.68389	0.0418082	0.299285
FBgn0000247	ca	10.5521	0.144699	0.18201	0.426609	0.744127
FBgn0000250	cact	11.2922	-0.10283	0.169883	0.544978	0.809556
FBgn0000251	cad	-1.16213	-0.446752	3.27298	0.891428	0.986524
FBgn0000253	Cam	13.2495	0.435965	0.244797	0.0749245	0.38945
FBgn0000256	capu	11.4909	0.385176	0.202613	0.0572963	0.340404
FBgn0000257	car	8.91041	0.62664	0.25862	0.0153925	0.215567
FBgn0000259	CkIIbeta	11.4756	-0.213269	0.311643	0.493762	0.782982
FBgn0000261	Cat	14.2116	0.0338938	0.286526	0.905836	0.992033
FBgn0000273	Pka-C1	10.9166	0.576355	0.25698	0.0249097	0.253144
FBgn0000276	CecA1	-1.12268	-0.616298	2.48053	0.803783	0.946813
FBgn0000278	CecB	-0.92001	1.79611	3.64627	0.622304	0.851149
FBgn0000279	CecC	0.484249	1.00627	1.54451	0.514715	0.79303
FBgn0000283	Cp190	11.7955	-0.175782	0.199019	0.377105	0.71117
FBgn0000286	Cf2	9.43236	0.656805	0.300013	0.0285784	0.263082
FBgn0000287	salr	11.536	0.0840239	0.146668	0.566723	0.821767
FBgn0000289	cg	12.4473	0.177702	0.110593	0.108098	0.449671
FBgn0000299	Col4a1	10.9813	0.417688	0.366736	0.254731	0.625639
FBgn0000303	ChAT	1.51051	0.238782	0.872184	0.784258	0.935517
FBgn0000307	chif	10.9703	-0.316282	0.325896	0.331798	0.679051
FBgn0000308	chic	14.3064	0.621782	0.284928	0.0290916	0.264356
FBgn0000316	cin	10.058	-0.639306	0.729972	0.381141	0.714339
FBgn0000317	ck	11.6734	-0.41537	0.290928	0.153367	0.51746
FBgn0000318	cl	11.0586	0.320656	0.146736	0.0288695	0.264356
FBgn0000319	Chc	13.6819	-0.191385	0.176558	0.278374	0.642904
FBgn0000320	eya	8.04145	0.855802	0.553606	0.122136	0.469479
FBgn0000326	clt	8.55744	-0.34619	0.357562	0.332948	0.680401
FBgn0000330	cm	9.97901	-0.199536	0.29482	0.498529	0.784739
FBgn0000337	cn	0.268373	-0.059095	2.10805	0.977636	1
FBgn0000339	cni	9.33396	-1.32371	1.05959	0.211571	0.584416
FBgn0000346	comt	7.87932	-0.0579933	0.194173	0.765193	0.928137
FBgn0000351	cort	6.22092	0.125703	0.335635	0.708015	0.899671
FBgn0000352	cos	10.664	0.21753	0.124056	0.0795191	0.39822
FBgn0000357	Cp18	2.26944	-0.0415289	0.799437	0.95857	1
FBgn0000359	Cp36	-1.09841	-0.971376	3.89101	0.802861	0.946426
FBgn0000370	crc	11.8562	-0.68278	0.920139	0.458063	0.761534
FBgn0000376	crm	9.59012	0.410496	0.17994	0.0225314	0.244326
FBgn0000377	crn	10.1282	0.206852	0.115933	0.0743834	0.388516
FBgn0000382	csw	10.8077	0.774214	0.315893	0.014251	0.21393
FBgn0000384	cta	9.56275	-0.475831	0.185743	0.0104141	0.204412
FBgn0000394	cv	10.5618	-0.183698	0.158951	0.247809	0.621187
FBgn0000395	cv-2	10.5947	0.64361	0.262346	0.0141557	0.213691
FBgn0000404	CycA	11.6284	-0.436483	0.353701	0.217187	0.589016
FBgn0000405	CycB	11.6259	0.147402	0.122317	0.228173	0.599079
FBgn0000406	Cyt-b5-r	5.2982	0.111202	2.12753	0.958315	1
FBgn0000411	D	1.5355	0.437467	1.208	0.717247	0.905214
FBgn0000412	D1	13.5891	0.696867	0.256959	0.00668837	0.20054
FBgn0000414	Dab	11.1883	0.00856415	0.182761	0.962625	1
FBgn0000416	Sap-r	13.1179	-0.206229	0.181929	0.256975	0.627281
FBgn0000422	Ddc	4.37445	0.0847901	0.633004	0.893443	0.986962
FBgn0000426	SmF	10.3072	-0.0244741	0.356847	0.945321	1
FBgn0000439	Dfd	1.0971	0.575186	2.22773	0.796258	0.942779
FBgn0000442	Pkg21D	4.56965	-0.502942	0.669725	0.452672	0.758075
FBgn0000447	Dhod	10.7814	-0.248899	0.101314	0.0140214	0.212676
FBgn0000448	Hr3	4.10494	-0.354009	1.73653	0.838463	0.964523
FBgn0000449	dib	3.05652	-3.39026	1.35506	0.0123521	0.209107
FBgn0000451	ect	9.95842	0.38467	0.323745	0.234759	0.606791
FBgn0000454	Dip-B	11.6758	-0.518874	0.310064	0.0942401	0.424516
FBgn0000455	Dip-C	9.61828	0.39664	0.131051	0.00247311	0.199862
FBgn0000459	disco	7.46986	0.139851	0.299371	0.640392	0.862012
FBgn0000463	Dl	11.501	0.371883	0.207404	0.0729667	0.385202
FBgn0000464	Lar	7.2388	-0.00441202	0.300007	0.988266	1
FBgn0000473	Cyp6a2	4.53412	0.510886	1.23374	0.678804	0.882673
FBgn0000477	DNaseII	5.02373	0.264533	1.47786	0.85794	0.972644
FBgn0000479	dnc	9.6958	0.721284	0.289042	0.0125804	0.209143
FBgn0000482	dor	9.87823	0.272282	0.134224	0.0425024	0.300645
FBgn0000489	Pka-C3	8.22442	0.124368	0.486766	0.798339	0.943825
FBgn0000490	dpp	10.6253	0.583848	0.251323	0.0201736	0.237011
FBgn0000492	Dr	11.2215	0.692859	0.266065	0.00921165	0.20054
FBgn0000499	dsh	10.6754	0.249728	0.152927	0.102471	0.439003
FBgn0000500	Dsk	3.99865	-0.303471	1.04171	0.770807	0.929773
FBgn0000504	dsx	10.1355	0.357068	0.251511	0.155699	0.521053
FBgn0000520	dwg	9.44223	0.669873	0.250764	0.0075551	0.20054
FBgn0000524	dx	11.5684	0.358013	0.188203	0.0571353	0.340393
FBgn0000527	e	8.53797	-1.00886	0.799043	0.20674	0.579385
FBgn0000533	ea	8.27345	0.322575	0.353987	0.362157	0.700491
FBgn0000535	eag	1.29961	-1.05746	0.920803	0.250797	0.62281
FBgn0000536	eas	9.98281	-0.703474	0.322107	0.028964	0.264356
FBgn0000541	E(bx)	12.0664	-0.499965	0.415973	0.229396	0.600355
FBgn0000542	ec	13.2154	0.282717	0.199242	0.15591	0.521465
FBgn0000543	ecd	10.3592	0.353582	0.145799	0.0153026	0.215273
FBgn0000546	EcR	11.3825	0.466754	0.222739	0.0361252	0.28439
FBgn0000547	ed	14.1759	0.091757	0.122132	0.452474	0.757971
FBgn0000551	Edg78E	3.49525	1.58011	0.976625	0.105677	0.445043
FBgn0000552	Edg84A	-0.343901	-1.28041	2.73253	0.639369	0.861475
FBgn0000557	eEF1alpha2	10.7252	-0.312812	0.696198	0.653205	0.86932
FBgn0000559	eEF2	16.624	-0.217457	0.148994	0.144427	0.504769
FBgn0000560	eg	7.91871	0.43872	0.297793	0.140687	0.49868
FBgn0000562	egl	11.2869	0.306019	0.180047	0.089194	0.414539
FBgn0000565	MsrA	10.4064	-0.190493	0.154426	0.217368	0.589016
FBgn0000566	Eip55E	10.2507	-0.00888124	0.190597	0.962834	1
FBgn0000567	Eip74EF	12.0442	1.01102	0.409635	0.0135835	0.211537
FBgn0000568	Eip75B	12.8693	0.716522	0.348096	0.0395517	0.291766
FBgn0000575	emc	12.771	1.15832	0.412809	NA	NA
FBgn0000576	ems	9.84845	0.545439	0.262547	0.0377562	0.287181
FBgn0000577	en	10.8604	0.656643	0.248104	0.00812945	0.20054
FBgn0000578	ena	12.9678	0.455348	0.224715	0.0427305	0.301042
FBgn0000579	Eno	13.0769	0.72526	0.280986	0.00984799	0.202224
FBgn0000581	E(Pc)	11.8884	0.46122	0.238313	0.0529474	0.329325
FBgn0000588	esc	7.87526	0.709553	0.398219	0.0747795	0.389209
FBgn0000591	E(spl)m8-HLH	7.70229	2.21394	0.595614	0.000201546	0.0748724
FBgn0000592	Est-6	1.75108	0.99592	2.39509	NA	NA
FBgn0000594	Est-P	3.72561	-1.68323	1.45156	0.246213	0.618878
FBgn0000611	exd	12.3551	0.533126	0.212639	0.0121695	0.209107
FBgn0000615	exu	4.00786	0.146381	0.454362	0.747325	0.919257
FBgn0000617	e(y)1	9.49911	0.845183	0.285381	0.00306052	0.199862
FBgn0000618	e(y)2	8.7349	-0.144366	0.311183	0.6427	0.863258
FBgn0000625	eyg	9.13554	1.00423	0.34167	0.0032907	0.199862
FBgn0000629	E(z)	9.78433	-0.410193	0.338024	0.224938	0.595737
FBgn0000633	CG17716	4.11325	1.21854	0.68201	0.0739873	0.387973
FBgn0000635	Fas2	12.324	-0.0891385	0.133924	0.505674	0.789677
FBgn0000636	Fas3	13.4312	0.201377	0.125464	0.108481	0.44984
FBgn0000639	Fbp1	12.8779	-0.451982	1.0122	0.655212	0.870278
FBgn0000640	Fbp2	11.2776	-0.491738	1.2861	0.702203	0.895401
FBgn0000644	Fcp3C	6.28488	-0.557616	0.527672	0.290627	0.649683
FBgn0000658	fj	12.3458	0.411003	0.168359	0.0146372	0.214013
FBgn0000659	fkh	3.7818	1.92895	0.863618	0.0255115	0.25473
FBgn0000662	fl(2)d	11.3682	0.443912	0.179402	0.0133457	0.210602
FBgn0000667	Actn	12.0811	0.0199572	0.214534	0.925883	0.998504
FBgn0000709	fliI	10.1841	0.0218364	0.187668	0.90737	0.992239
FBgn0000711	flw	10.3497	-0.0679965	0.133263	0.609881	0.846698
FBgn0000719	fog	9.0511	-0.523798	0.314109	0.0954015	0.426567
FBgn0000721	for	11.0094	0.0239099	0.146857	0.870668	0.978167
FBgn0000723	FER	11.4746	0.17466	0.267483	0.513772	0.79303
FBgn0000808	gd	0.594464	3.46065	1.71411	0.0434957	0.302874
FBgn0000810	fs(1)K10	9.53715	-0.0968301	0.0818444	0.236769	0.609216
FBgn0000826	png	4.02019	0.245083	0.519562	0.637134	0.860952
FBgn0000927	fs(1)Ya	2.79337	1.79914	0.599588	0.00269433	0.199862
FBgn0000928	fs(1)Yb	3.3155	0.347412	0.894743	0.697808	0.893875
FBgn0000996	dup	9.71467	0.107637	0.18365	0.557809	0.818248
FBgn0001075	ft	13.0076	-0.21906	0.275028	0.425742	0.743341
FBgn0001078	ftz-f1	7.29306	-0.0854374	0.706325	0.903722	0.991495
FBgn0001079	fu	9.60463	0.179475	0.140808	0.202449	0.575089
FBgn0001083	fw	10.5026	0.295713	0.181297	0.10287	0.439989
FBgn0001084	fy	9.29983	-0.343379	0.288623	0.234158	0.606336
FBgn0001085	fz	11.3015	0.46952	0.23201	0.0430006	0.301478
FBgn0001086	fzy	10.3743	-0.348677	0.467676	0.455938	0.760383
FBgn0001087	g	10.854	0.0510796	0.131901	0.698565	0.89391
FBgn0001089	Gal	10.1306	-0.50754	0.754949	0.501403	0.78698
FBgn0001090	bnb	19.6371	1.00944	0.42233	0.0168406	0.221974
FBgn0001091	Gapdh1	11.9762	0.442528	0.241367	0.0667396	0.368799
FBgn0001092	Gapdh2	12.9744	0.268269	0.150071	0.0738394	0.387558
FBgn0001098	Gdh	12.6996	0.818393	0.27428	0.00284706	0.199862
FBgn0001099	gdl	4.27269	-0.169763	0.490724	0.729385	0.910864
FBgn0001104	Galphai	11.8348	0.320421	0.245529	0.191884	0.561815
FBgn0001105	Gbeta13F	12.4649	0.463602	0.248711	0.0623189	0.356022
FBgn0001108	DCTN1-p150	10.96	-0.0285592	0.147866	0.846847	0.968223
FBgn0001112	Gld	9.16421	-0.705711	0.340355	0.0381298	0.288468
FBgn0001114	Glt	11.5477	-0.14074	0.321368	0.661429	0.872825
FBgn0001120	gnu	-0.741383	-0.446769	2.2437	0.842168	0.966193
FBgn0001122	Galphao	9.69085	-0.0719672	0.242844	0.766961	0.928576
FBgn0001123	Galphas	11.1289	0.620278	0.242563	0.0105523	0.204585
FBgn0001124	Got1	11.2117	-0.245577	0.34608	0.477956	0.774532
FBgn0001125	Got2	10.8879	0.292088	0.187108	0.118509	0.463816
FBgn0001128	Gpdh1	8.53752	0.0263841	0.150098	0.860467	0.973648
FBgn0001133	grau	9.06305	-0.106448	0.268381	0.69164	0.889864
FBgn0001134	Grd	0.501322	0.183248	1.50845	0.90331	0.99121
FBgn0001137	grk	3.80696	-0.094823	0.570819	0.868064	0.977006
FBgn0001138	grn	10.7993	0.873128	0.349754	0.0125458	0.209107
FBgn0001139	gro	12.3221	0.565798	0.208283	0.00659781	0.20054
FBgn0001142	Gs1	9.40105	0.444395	0.713632	0.533466	0.801857
FBgn0001145	Gs2	7.32335	0.00385193	0.35085	0.99124	1
FBgn0001147	gsb-n	2.41312	0.0402708	1.08408	0.970367	1
FBgn0001148	gsb	2.24677	-0.894119	1.38259	0.517826	0.794427
FBgn0001149	GstD1	14.1395	0.691903	0.265364	0.00912384	0.20054
FBgn0001150	gt	5.42354	-0.597677	0.275612	0.0301172	0.267658
FBgn0001168	h	9.45798	0.571881	0.289586	0.0482888	0.316273
FBgn0001169	H	11.3279	0.773153	0.275995	0.00508929	0.20054
FBgn0001170	H2.0	4.99778	-0.646788	0.659288	0.326573	0.675431
FBgn0001174	halo	-0.290952	1.40075	2.27042	0.537262	0.803858
FBgn0001179	hay	9.24287	-0.00219313	0.147783	0.98816	1
FBgn0001180	hb	2.08171	0.88631	1.24373	0.476079	0.77293
FBgn0001185	her	9.1758	-0.631217	0.277235	0.0227965	0.245734
FBgn0001186	Hex-A	10.5408	-0.158845	0.119299	0.18303	0.552504
FBgn0001187	Hex-C	-0.00814323	0.148278	1.80872	0.934663	1
FBgn0001189	hfw	10.3723	-0.224306	0.178453	0.208773	0.581044
FBgn0001197	His2Av	12.7412	0.359972	0.181282	0.0470657	0.312362
FBgn0001202	hook	9.70643	-0.113597	0.13733	0.408136	0.733705
FBgn0001206	Hmr	9.43568	-0.22815	0.234958	0.331536	0.679043
FBgn0001208	Hn	7.07876	-0.725335	0.9389	0.439797	0.750707
FBgn0001215	Hrb98DE	13.2374	-0.0502461	0.0685652	0.463667	0.765395
FBgn0001216	Hsc70-1	1.14731	-1.16953	1.16009	0.31339	0.665603
FBgn0001217	Hsc70-2	2.20603	-0.815977	0.838941	0.330738	0.678145
FBgn0001218	Hsc70-3	14.7337	-0.157835	0.281824	0.575447	0.827568
FBgn0001220	Hsc70-5	11.6742	0.0415173	0.134015	0.756717	0.924058
FBgn0001222	Hsf	10.7147	-0.318432	0.318555	0.317499	0.668603
FBgn0001224	Hsp23	15.393	0.112067	0.265796	0.673295	0.879246
FBgn0001225	Hsp26	12.7386	0.223631	0.52055	0.667482	0.876335
FBgn0001226	Hsp27	15.9923	0.703328	0.33506	0.0358069	0.283426
FBgn0001227	Hsp67Ba	13.4332	0.0632626	0.241099	0.793019	0.941307
FBgn0001228	CG4456	1.05183	-1.9427	1.61075	0.227786	0.599079
FBgn0001229	Hsp67Bc	6.67145	-0.919073	0.755662	0.22389	0.594589
FBgn0001230	Hsp68	8.19001	-0.699384	0.764486	0.360275	0.699192
FBgn0001233	Hsp83	14.7407	-1.1055	0.23234	1.95422e-06	0.00288737
FBgn0001234	lncRNA:Hsromega	10.4432	0.191593	0.48225	0.691154	0.88982
FBgn0001235	hth	12.4616	0.452764	0.311201	0.145698	0.506414
FBgn0001247	Ide	10.3409	-0.521108	0.449465	0.246294	0.618878
FBgn0001248	Idh	13.387	0.000882814	0.0930313	0.992429	1
FBgn0001250	if	11.3236	-0.0444443	0.218743	0.838994	0.964556
FBgn0001253	ImpE1	11.8999	-0.198321	0.684835	0.77213	0.92999
FBgn0001254	ImpE2	17.6025	0.469006	0.592427	0.428554	0.744708
FBgn0001255	ImpE3	10.2702	0.00703828	0.631306	0.991105	1
FBgn0001256	ImpL1	10.5067	-0.37755	0.645761	0.558777	0.818821
FBgn0001257	ImpL2	7.78052	3.00248	0.815303	NA	NA
FBgn0001258	Ldh	7.30256	0.874112	0.509138	0.0860073	0.411032
FBgn0001259	in	10.3767	-0.12797	0.153791	0.405351	0.730974
FBgn0001263	inaD	4.7339	-0.184344	0.282274	0.513712	0.79303
FBgn0001269	inv	11.0263	0.579665	0.206134	0.00492225	0.20054
FBgn0001276	ix	8.59441	-0.115544	0.366476	0.752547	0.921868
FBgn0001280	janA	10.5886	-0.203607	0.308487	0.509243	0.791514
FBgn0001281	janB	-0.563137	0	2.33461	1	1
FBgn0001285	Jon44E	-0.932772	1.64178	3.89545	0.673419	0.879246
FBgn0001291	Jra	10.0339	-0.245868	0.205241	0.230936	0.602441
FBgn0001296	kar	9.18239	0.0636042	0.258261	0.805466	0.94723
FBgn0001297	kay	10.5246	0.729131	0.340894	0.0324453	0.274127
FBgn0001301	kel	10.8104	-0.0128628	0.117466	0.912804	0.993228
FBgn0001308	Khc	12.3588	0.058748	0.11417	0.606856	0.844483
FBgn0001311	kkv	13.2338	0.135524	0.168895	0.422311	0.742152
FBgn0001316	klar	13.9596	0.0192367	0.180561	0.915155	0.99413
FBgn0001319	kn	10.6356	0.410968	0.259832	0.113726	0.458629
FBgn0001320	kni	9.15559	0.621464	0.330902	0.0603689	0.350128
FBgn0001321	knk	10.2105	-0.476055	0.536918	0.375271	0.710166
FBgn0001323	knrl	8.21454	0.292322	0.304915	0.33771	0.684337
FBgn0001324	kto	11.5518	0.293123	0.231197	0.204851	0.576488
FBgn0001325	Kr	3.10068	-0.446756	1.90818	0.814887	0.951903
FBgn0001330	kz	8.82968	-0.351247	0.369214	0.341433	0.686251
FBgn0001341	Mybbp1A	9.79443	-0.124104	0.205926	0.546734	0.811451
FBgn0001404	egh	9.59484	-0.182418	0.18003	0.310934	0.665061
FBgn0001491	l(1)10Bb	9.26891	-0.292011	0.216344	0.177095	0.546402
FBgn0001565	Hlc	10.5993	0.49408	0.250354	0.0484354	0.316428
FBgn0001612	Grip91	9.36058	-0.580488	0.460215	0.207186	0.57953
FBgn0001624	dlg1	11.5425	0.0284169	0.113204	0.801797	0.946229
FBgn0001941	ifc	9.5039	0.0411818	0.102247	0.68712	0.887795
FBgn0001942	eIF4A	15.5877	0.297255	0.168661	0.0779955	0.395045
FBgn0001961	Arpc1	11.275	0.340639	0.19069	0.0740418	0.387973
FBgn0001965	Sos	11.016	0.299752	0.205228	0.144132	0.504577
FBgn0001967	NimC3	8.51843	0.606268	0.636832	0.341093	0.686017
FBgn0001970	Pgant35A	10.0091	0.574976	0.248429	0.0206434	0.237171
FBgn0001977	CIAPIN1	10.2698	-0.224995	0.225357	0.318087	0.669002
FBgn0001978	stc	10.9181	0.290814	0.175055	0.0966585	0.428385
FBgn0001981	esg	9.75652	0.313457	0.16299	0.0544588	0.333971
FBgn0001983	wor	1.53798	0.473151	0.903406	0.600458	0.84059
FBgn0001986	Mtr4	9.92313	-0.146296	0.274195	0.593654	0.838241
FBgn0001987	Gli	12.1422	0.299841	0.21426	0.161685	0.527932
FBgn0001989	ND-B17	10.5112	1.26332	0.397579	0.00148536	0.173292
FBgn0001990	wek	8.45206	-0.346508	0.254641	0.173586	0.542656
FBgn0001991	Ca-alpha1D	3.71858	-1.10587	0.56365	0.049765	0.319551
FBgn0001992	Cyp303a1	2.31698	0.454338	0.686345	0.507992	0.791207
FBgn0001994	crp	12.0417	0.143187	0.131284	0.275419	0.640945
FBgn0001995	mRpL4	9.07588	0.837891	0.321929	0.00924883	0.20054
FBgn0002021	l(2)37Bb	8.45923	-0.0962795	0.52037	0.853212	0.970455
FBgn0002022	Catsup	11.1559	0.13992	0.11037	0.204892	0.576488
FBgn0002023	Lim3	0.0291261	-0.891764	1.62523	0.583211	0.833132
FBgn0002031	l(2)37Cc	11.5317	0.494749	0.195807	0.0115135	0.208088
FBgn0002036	CG10561	6.79333	0.307723	0.186405	0.0987736	0.434339
FBgn0002044	swm	11.3503	0.291876	0.197117	0.13868	0.496189
FBgn0002069	AspRS	11.9113	-0.289134	0.247665	0.243032	0.616037
FBgn0002121	l(2)gl	11.6555	-0.532634	0.450574	0.237158	0.609789
FBgn0002174	CG5504	10.3957	1.05145	0.371398	0.00463925	0.20054
FBgn0002183	dre4	12.1584	-0.08656	0.178115	0.626983	0.853598
FBgn0002283	l(3)73Ah	9.38592	-0.206084	0.172139	0.231231	0.602742
FBgn0002284	Prosbeta6	11.3948	-0.0417884	0.217068	0.847341	0.968223
FBgn0002306	sas	12.7305	-0.0528548	0.135224	0.695895	0.892231
FBgn0002354	l(3)87Df	6.1042	-1.00318	0.362633	0.0056685	0.20054
FBgn0002413	dco	12.0235	0.170347	0.160145	0.287464	0.647143
FBgn0002431	hyd	12.1602	-0.380669	0.254814	0.135199	0.491276
FBgn0002440	l(3)mbn	0.165111	0	4.19743	1	1
FBgn0002441	l(3)mbt	10.3238	0.128668	0.158256	0.416195	0.738246
FBgn0002466	sti	10.6544	-0.713467	0.362011	0.0487419	0.317252
FBgn0002521	pho	10.1908	2.67267	0.813051	NA	NA
FBgn0002522	lab	2.09067	0.0734629	1.25838	0.953447	1
FBgn0002524	lace	9.60295	-0.05616	0.121477	0.643859	0.863935
FBgn0002525	Lam	13.5119	0.546597	0.223168	0.014315	0.21393
FBgn0002526	LanA	12.3348	-0.527974	0.350126	0.131566	0.483704
FBgn0002531	Lcp1	7.31907	-2.77286	1.8371	0.131205	0.483085
FBgn0002533	Lcp2	5.92506	0	1.7201	1	1
FBgn0002534	Lcp3	4.97161	-2.41882	2.25785	0.284037	0.645639
FBgn0002535	Lcp4	7.11714	0.978677	1.98037	0.621173	0.850882
FBgn0002542	lds	10.4215	-0.310725	0.30433	0.307249	0.662933
FBgn0002543	robo2	12.607	0.314196	0.295386	0.287474	0.647143
FBgn0002552	lin	10.3607	0.302143	0.166125	0.0689463	0.374343
FBgn0002561	l(1)sc	0.489257	1.44611	1.65876	0.383316	0.716332
FBgn0002562	Lsp1alpha	12.1246	0.174855	1.82818	0.923803	0.99794
FBgn0002563	Lsp1beta	12.6398	-0.405701	1.43215	0.776961	0.93207
FBgn0002564	Lsp1gamma	12.4085	-0.800526	1.65875	0.629375	0.855278
FBgn0002565	Lsp2	12.2479	-0.532202	1.3123	0.685074	0.887346
FBgn0002566	lt	9.90406	-0.696699	0.825216	NA	NA
FBgn0002567	Rab32	8.1688	0.0802992	0.288755	0.780945	0.933816
FBgn0002569	Mal-A2	0.3007	3.60402	5.02579	0.47331	0.771434
FBgn0002573	sens	6.25471	0.579311	0.481018	0.228457	0.599147
FBgn0002576	lz	1.62061	-0.731944	1.56712	0.640456	0.862012
FBgn0002577	m	11.1126	-0.855398	0.787627	0.277459	0.642099
FBgn0002578	Kaz-m1	-0.580555	-1.88444	2.52792	0.456	0.760383
FBgn0002579	RpL36	14.7502	0.106531	0.145411	0.46379	0.765395
FBgn0002590	RpS5a	15.5798	0.389723	0.198391	0.0494814	0.318924
FBgn0002592	E(spl)m2-BFM	9.6288	-0.430601	0.412202	0.296192	0.65286
FBgn0002593	RpLP1	15.4371	0.813707	0.33059	0.0138403	0.212325
FBgn0002609	E(spl)m3-HLH	9.74452	-0.0408064	0.147813	0.782496	0.934442
FBgn0002622	RpS3	15.3416	0.429366	0.210968	0.0418289	0.299285
FBgn0002626	RpL32	14.8756	0.713153	0.281004	0.0111528	0.207579
FBgn0002629	E(spl)m4-BFM	8.05358	1.4944	0.729881	0.0406133	0.295788
FBgn0002631	E(spl)m5-HLH	3.52943	0.638032	0.653458	0.32887	0.676691
FBgn0002632	E(spl)m6-BFM	7.23778	-0.228105	0.707189	0.747035	0.919212
FBgn0002633	E(spl)m7-HLH	8.99438	-0.619674	0.276227	0.0248744	0.253025
FBgn0002638	Rcc1	11.0973	0.358759	0.20581	0.0813055	0.401409
FBgn0002641	mal	8.66394	0.0541144	0.185674	0.770709	0.929773
FBgn0002643	mam	12.5278	0.632528	0.359958	0.0788792	0.396548
FBgn0002645	Map205	12.2799	-0.408574	0.245554	0.0961359	0.427673
FBgn0002673	twe	5.93093	-0.127198	0.472856	0.78793	0.938068
FBgn0002707	mei-9	8.77526	-0.224995	0.198395	0.256762	0.626957
FBgn0002709	mei-218	4.82681	0.603653	1.12817	0.592598	0.837702
FBgn0002715	mei-S332	7.97826	-0.0777869	0.174849	0.656407	0.870965
FBgn0002716	mei-W68	3.36953	0.30312	0.466809	0.516116	0.79393
FBgn0002719	Men	10.2455	-0.0140261	0.233546	0.95211	1
FBgn0002723	Met	8.6996	0.441665	0.238978	0.0645819	0.363371
FBgn0002732	E(spl)malpha-BFM	10.3077	-0.378235	0.286473	0.186729	0.555864
FBgn0002733	E(spl)mbeta-HLH	11.3702	0.344689	0.227937	0.130479	0.482495
FBgn0002734	E(spl)mdelta-HLH	8.35655	-0.40555	0.152295	0.00774669	0.20054
FBgn0002735	E(spl)mgamma-HLH	5.90418	-0.483248	0.275707	0.079644	0.39822
FBgn0002736	mago	10.3373	-0.401006	0.355178	0.258886	0.629118
FBgn0002772	Mlc1	5.13657	-3.1168	1.07163	0.00363201	0.20054
FBgn0002773	Mlc2	6.9856	-1.16294	0.699948	0.0966213	0.428381
FBgn0002774	mle	11.2188	-0.324955	0.261136	0.213356	0.585864
FBgn0002775	msl-3	9.06412	0.030678	0.122856	0.802815	0.946426
FBgn0002778	mnd	9.11977	-0.0688335	0.20434	0.736224	0.914097
FBgn0002780	mod	12.5464	-0.751213	0.737124	0.308149	0.663204
FBgn0002781	mod(mdg4)	13.2347	0.683772	0.247959	0.00582282	0.20054
FBgn0002783	mor	12.5508	0.157192	0.122166	0.198198	0.570229
FBgn0002787	Rpn8	11.5013	-0.0468644	0.157029	0.765364	0.928142
FBgn0002789	Mp20	4.31771	0.694087	1.28095	0.58792	0.834957
FBgn0002791	mr	9.44752	-0.537551	0.45631	0.23878	0.61115
FBgn0002838	ms(3)K81	-0.700574	1.38564	2.76177	0.615862	0.84918
FBgn0002862	Mst87F	0.222351	-0.799379	1.54775	0.605521	0.843718
FBgn0002863	Acp95EF	1.98453	1.70468	1.20998	0.158878	0.525154
FBgn0002868	MtnA	6.35068	4.20358	0.928162	5.92825e-06	0.00778577
FBgn0002869	MtnB	6.71781	9.10153	2.55638	NA	NA
FBgn0002872	mu2	9.3109	-0.30909	0.34431	0.36934	0.705608
FBgn0002873	mud	10.164	0.181478	0.243607	0.456294	0.760383
FBgn0002878	mus101	8.70763	0.144308	0.179998	0.422713	0.742325
FBgn0002887	mus201	8.41714	-0.0468701	0.207434	0.821239	0.955175
FBgn0002891	DNApol-zeta	7.63889	-0.207911	0.303278	0.493	0.782861
FBgn0002899	mus301	7.98611	0.230252	0.276302	0.404655	0.730567
FBgn0002901	mus304	7.76572	-0.664368	0.375095	0.0765276	0.392167
FBgn0002905	DNApol-theta	8.70796	0.111322	0.177608	0.5308	0.801332
FBgn0002906	Blm	9.32616	-0.0177478	0.367312	0.961463	1
FBgn0002917	na	5.78345	0.7009	0.351062	0.0458782	0.310073
FBgn0002921	Atpalpha	13.6786	0.0688977	0.119867	0.565438	0.821268
FBgn0002922	nau	3.33628	-1.40846	0.943947	0.135674	0.491912
FBgn0002924	ncd	10.4433	0.320357	0.195983	0.102129	0.438213
FBgn0002930	nec	7.76742	0.449865	0.726021	0.5355	0.802945
FBgn0002931	net	8.16462	-0.240159	0.177866	0.176943	0.546254
FBgn0002932	neur	9.58633	0.34597	0.21447	0.106714	0.447449
FBgn0002936	ninaA	0.383144	-2.69746	1.75013	0.123246	0.471446
FBgn0002938	ninaC	4.77894	-1.08867	0.556403	0.050393	0.321266
FBgn0002939	ninaD	2.50796	-0.80702	1.27908	0.528081	0.800481
FBgn0002941	slou	0.371255	-3.59593	1.47875	0.0150268	0.214434
FBgn0002945	nkd	12.143	0.652203	0.296775	0.0279753	0.262435
FBgn0002948	nod	8.95017	0.645956	0.205786	0.00169539	0.176042
FBgn0002962	nos	2.29879	-0.500649	0.699994	0.474473	0.772154
FBgn0002973	numb	12.6111	0.603158	0.240472	0.0121341	0.209107
FBgn0002985	odd	7.13659	0.204585	0.436601	0.639365	0.861475
FBgn0002989	okr	7.8972	-0.357879	0.200726	0.0745988	0.388954
FBgn0003002	opa	9.00225	0.673698	0.307294	0.0283535	0.262648
FBgn0003008	or	8.82857	-0.671886	0.523028	0.198929	0.570713
FBgn0003016	osp	11.0743	-0.104449	0.202647	0.606258	0.844148
FBgn0003023	otu	1.77263	0.316328	0.80493	0.694328	0.891673
FBgn0003028	ovo	12.7015	0.187256	0.229994	0.415543	0.737938
FBgn0003041	pbl	10.1517	0.00589863	0.257017	0.98169	1
FBgn0003042	Pc	8.73914	-0.169404	0.254019	0.504838	0.788788
FBgn0003044	Pcl	10.8539	0.204705	0.124709	0.100701	0.437534
FBgn0003046	Pcp	3.24221	-1.07506	1.115	0.334958	0.682573
FBgn0003048	pcx	10.9137	0.323576	0.234677	0.167952	0.536634
FBgn0003053	peb	7.79617	0.23061	0.299029	0.440589	0.750707
FBgn0003060	CG9757	1.86775	-0.446733	2.82652	0.874417	0.979724
FBgn0003062	Fib	11.6923	0.762428	0.302961	0.0118497	0.209107
FBgn0003065	CG2150	7.87585	0.627829	0.538642	0.243786	0.616642
FBgn0003068	per	3.95515	-1.00745	0.378217	0.00772908	0.20054
FBgn0003071	Pfk	11.0577	0.0561649	0.101836	0.581275	0.832002
FBgn0003074	Pgi	10.9128	0.212231	0.117538	0.0709763	0.380173
FBgn0003076	Pgm1	8.71722	-0.366495	0.288198	0.203487	0.575707
FBgn0003079	Raf	9.96824	-0.301488	0.236312	0.202026	0.574357
FBgn0003082	phr	7.70937	0.114587	0.249642	0.646231	0.86516
FBgn0003087	pim	8.77677	-1.95999	0.953001	0.0397204	0.292338
FBgn0003089	pip	9.37414	-0.477393	0.557352	0.3917	0.722405
FBgn0003090	pk	12.2393	0.580057	0.299631	0.0528796	0.329314
FBgn0003091	Pkc53E	3.88457	-0.447587	0.910941	0.623181	0.851185
FBgn0003093	Pkc98E	11.1077	0.339992	0.16093	0.0346285	0.279567
FBgn0003116	pn	6.65173	0.536446	0.230879	0.0201525	0.237011
FBgn0003117	pnr	8.73303	0.394384	0.27528	0.151954	0.515804
FBgn0003118	pnt	9.86779	0.320923	0.160973	0.0461901	0.310741
FBgn0003124	polo	11.8751	-0.316183	0.31476	0.315127	0.667729
FBgn0003129	Poxm	2.08733	-1.58929	1.00267	0.112955	0.456904
FBgn0003130	Poxn	8.03113	0.118321	0.116085	0.308076	0.663186
FBgn0003134	Pp1alpha-96A	10.0321	0.0441889	0.0813263	0.586887	0.834681
FBgn0003137	Ppn	12.516	-0.0111258	0.256836	0.965447	1
FBgn0003139	PpV	9.97819	-0.0204581	0.129306	0.874288	0.979724
FBgn0003141	pr	9.39484	-0.634288	0.664392	0.339735	0.685736
FBgn0003149	Prm	5.4826	0.423463	0.841319	0.61473	0.848862
FBgn0003159	CG2841	9.9351	-0.095063	0.144273	0.509954	0.791514
FBgn0003162	Pu	9.0343	0.475754	0.298237	0.110663	0.45389
FBgn0003165	pum	12.8676	0.635903	0.314522	0.0431963	0.302069
FBgn0003169	put	11.4263	-0.307786	0.170723	0.0714138	0.381454
FBgn0003174	pwn	12.1092	0.48226	0.252782	0.056416	0.339185
FBgn0003175	px	10.8599	0.592589	0.295125	0.044651	0.306312
FBgn0003187	qua	8.87564	-1.03081	0.855675	0.228329	0.599079
FBgn0003189	r	11.4291	0.238983	0.185276	0.197093	0.568835
FBgn0003204	ras	11.3537	0.472923	0.186999	0.0114384	0.208048
FBgn0003205	Ras85D	11.9568	-0.178734	0.205508	0.384456	0.716988
FBgn0003206	Ras64B	10.9043	-0.348582	0.147179	0.0178639	0.226557
FBgn0003209	raw	10.05	-0.0180285	0.14804	0.903072	0.991191
FBgn0003210	rb	10.9946	-0.136426	0.173192	0.430865	0.745874
FBgn0003218	rdgB	9.62168	0.424955	0.254522	0.094994	0.426121
FBgn0003227	rec	7.8134	0.240771	0.184119	0.190978	0.561204
FBgn0003231	ref(2)P	11.1837	-0.20935	0.0822501	0.0109189	0.205884
FBgn0003250	Rh4	0.0303909	-0.446772	1.89392	0.813511	0.951749
FBgn0003254	rib	3.53178	0.506952	0.452887	0.262979	0.633011
FBgn0003255	rk	4.99309	-0.487226	0.752053	0.517075	0.794156
FBgn0003256	rl	9.21146	0.889018	1.01713	NA	NA
FBgn0003257	r-l	9.85697	0.600106	0.238904	0.0120077	0.209107
FBgn0003261	Rm62	15.2724	0.677174	0.258078	0.00869259	0.20054
FBgn0003268	rod	10.1415	-0.249054	0.267687	0.352168	0.694255
FBgn0003270	amos	-0.845214	-2.15658	4.47928	0.630191	0.855819
FBgn0003274	RpLP2	15.4974	1.00034	0.36114	0.00560632	0.20054
FBgn0003275	RpII18	10.4281	-0.156514	0.241091	0.516216	0.79393
FBgn0003277	RpII215	12.2009	-0.0955838	0.15974	0.549592	0.813623
FBgn0003278	RpI135	9.29952	-0.599225	0.532662	0.260605	0.631294
FBgn0003279	RpL4	16.1727	0.858879	0.326457	0.00851556	0.20054
FBgn0003285	rst	10.4898	0.19054	0.142841	0.182226	0.551295
FBgn0003292	rt	10.2622	-0.236388	0.310697	0.446758	0.754814
FBgn0003295	ru	6.17079	0.168191	0.348691	0.629558	0.855428
FBgn0003300	run	0.828631	0.807548	2.46529	0.743238	0.917536
FBgn0003301	rut	11.091	0.433288	0.2345	0.0646437	0.363371
FBgn0003302	rux	8.50885	-0.271099	0.241671	0.261961	0.632635
FBgn0003308	ry	4.41622	0.0852287	0.720622	0.905853	0.992033
FBgn0003310	S	11.0052	0.468298	0.25177	0.0628825	0.357514
FBgn0003312	sad	5.61989	-0.387382	0.439641	0.378247	0.71181
FBgn0003317	sax	10.4663	-0.0433375	0.109334	0.691826	0.890007
FBgn0003319	Sb	11.4429	0.464876	0.460191	0.312409	0.665428
FBgn0003321	sbr	10.7742	0.0120552	0.130337	0.926307	0.998734
FBgn0003326	sca	9.31407	0.289588	0.208908	0.165686	0.533359
FBgn0003330	Sce	9.93138	0.628422	0.27153	0.0206471	0.237171
FBgn0003334	Scm	10.3981	0.413567	0.176876	0.0193783	0.233636
FBgn0003339	Scr	5.9381	1.05136	1.02293	0.304047	0.660876
FBgn0003345	sd	12.5322	-0.275869	0.283641	0.330753	0.678145
FBgn0003346	RanGAP	10.9971	-0.159017	0.239437	0.506609	0.790406
FBgn0003353	sei	8.68252	-0.456089	0.336074	0.174746	0.54384
FBgn0003356	Jon99Cii	1.94248	0	2.79021	1	1
FBgn0003357	Jon99Ciii	2.11106	0.995936	2.51004	0.691529	0.88982
FBgn0003360	sesB	13.9973	-0.19195	0.169242	0.256721	0.626957
FBgn0003366	sev	6.47919	0.435615	0.522977	0.404872	0.730736
FBgn0003371	sgg	11.8483	0.41417	0.252475	0.100914	0.437534
FBgn0003372	Sgs1	-0.161334	0	5.20139	1	1
FBgn0003373	Sgs3	3.38193	0	2.06489	1	1
FBgn0003374	Sgs4	1.53816	0	2.14476	1	1
FBgn0003375	Sgs5	1.60961	0	2.28737	1	1
FBgn0003377	Sgs7	2.65831	2.15256	1.87514	0.250991	0.62281
FBgn0003378	Sgs8	1.63763	0.256418	1.36441	0.850929	0.969471
FBgn0003380	Sh	3.74671	-0.0677821	0.681415	0.920763	0.996559
FBgn0003382	sha	10.9797	-0.874075	0.499336	0.0800363	0.399168
FBgn0003386	Shaw	3.75987	0.00641477	0.383697	0.986661	1
FBgn0003388	shd	7.59774	-0.421047	0.425241	0.322107	0.671957
FBgn0003390	shf	12.4653	0.218058	0.122827	0.0758455	0.390799
FBgn0003391	shg	13.4142	-0.0472003	0.172233	0.784047	0.935463
FBgn0003392	shi	11.3149	0.0269542	0.0986829	0.784746	0.935994
FBgn0003396	shn	10.9689	-0.305573	0.243598	0.209691	0.581996
FBgn0003401	shu	6.9218	0.799129	0.400057	0.0457665	0.309886
FBgn0003410	sina	10.8232	0.454565	0.232394	0.0504641	0.321266
FBgn0003411	sisA	-0.647494	0	5.20139	1	1
FBgn0003415	skd	11.7387	0.308949	0.217404	0.155292	0.520512
FBgn0003416	sl	9.25858	-0.398263	0.265117	0.133041	0.48746
FBgn0003423	slgA	10.337	0.315824	0.167788	0.0597977	0.348697
FBgn0003429	slo	3.04369	-0.708659	0.480616	0.140353	0.498395
FBgn0003430	slp1	5.00022	0.588154	0.472772	0.21348	0.585864
FBgn0003435	sm	9.60278	0.156016	0.90987	0.863854	0.974665
FBgn0003444	smo	10.4047	-0.336345	0.371191	0.36487	0.702681
FBgn0003447	sn	12.8977	0.181328	0.296641	0.541021	0.805806
FBgn0003448	sna	1.1432	0.962325	1.35091	0.476248	0.77293
FBgn0003449	snf	10.645	-0.180011	0.213415	0.39896	0.727531
FBgn0003450	snk	-0.917055	0.859464	4.4936	0.848319	0.968711
FBgn0003459	stwl	8.93838	-0.35955	0.235154	0.126264	0.476981
FBgn0003460	so	7.4105	0.264332	0.435046	0.543455	0.807972
FBgn0003462	Sod1	12.4709	0.834184	0.304896	0.00621978	0.20054
FBgn0003463	sog	12.0892	0.501492	0.281058	0.0743744	0.388516
FBgn0003464	sol	11.6736	0.729429	0.286652	0.0109387	0.205884
FBgn0003475	spir	11.3814	0.65525	0.287855	0.022827	0.245734
FBgn0003479	spn-A	8.46174	0.552862	0.177706	0.00186388	0.180666
FBgn0003480	spn-B	6.91005	0.331064	0.315971	0.294746	0.652146
FBgn0003482	spn-D	4.83388	-0.229311	0.554894	0.679422	0.883181
FBgn0003483	spn-E	5.03318	-1.02871	0.608058	0.0906842	0.416119
FBgn0003486	spo	0.955084	2.45218	1.5613	0.116275	0.461353
FBgn0003495	spz	7.33315	-0.408263	0.428253	0.340428	0.685823
FBgn0003499	sr	8.26157	0.498415	0.411013	0.225264	0.596332
FBgn0003502	Btk29A	11.5929	-0.0501154	0.113369	0.658449	0.87164
FBgn0003507	srp	8.95828	0.385762	0.473547	0.415288	0.737819
FBgn0003512	Sry-delta	10.1263	0.405827	0.261425	0.120575	0.466819
FBgn0003513	ss	9.03043	0.566324	0.288339	0.0495199	0.318978
FBgn0003514	sqh	12.045	0.0794844	0.109256	0.466916	0.767479
FBgn0003515	st	4.4802	-0.0749832	0.412997	0.855929	0.972048
FBgn0003517	sta	16.0333	0.710801	0.296984	0.0166932	0.22126
FBgn0003520	stau	11.2966	0.158256	0.129073	0.22016	0.590785
FBgn0003525	stg	13.0693	0.684825	0.300043	0.0224643	0.244326
FBgn0003545	sub	8.89277	0.863701	0.503379	0.0861973	0.411032
FBgn0003557	Su(dx)	10.6706	0.304451	0.166672	0.0677516	0.37125
FBgn0003559	su(f)	10.6082	-0.096083	0.15539	0.536355	0.80347
FBgn0003567	su(Hw)	11.1936	-0.262451	0.167812	0.117828	0.463316
FBgn0003575	su(sable)	11.171	-0.119535	0.152943	0.43447	0.74817
FBgn0003598	Su(var)3-7	10.9641	-0.20009	0.249446	0.422473	0.742217
FBgn0003607	Su(var)205	12.4512	-0.256151	0.245847	0.297453	0.653754
FBgn0003612	Su(var)2-10	11.5376	0.452852	0.242461	0.0618	0.354256
FBgn0003638	su(w[a])	12.5348	0.327816	0.188514	0.0820446	0.401409
FBgn0003651	svp	8.73126	0.713102	0.394797	0.0708795	0.380173
FBgn0003654	sw	9.79864	0.346219	0.220712	0.11673	0.461608
FBgn0003655	swa	-0.756026	-3.12115	4.52876	0.490707	0.781425
FBgn0003656	sws	10.3543	0.042101	0.136957	0.758538	0.924872
FBgn0003660	Syb	11.9157	0.031491	0.0915103	0.730752	0.911157
FBgn0003676	CCT1	12.4838	0.140638	0.125919	0.264039	0.633888
FBgn0003687	Tbp	9.20084	0.315757	0.154567	0.0410677	0.296781
FBgn0003701	thr	8.26794	-0.631383	0.629682	0.316005	0.668257
FBgn0003710	tipE	5.29487	-0.166326	0.332549	0.616965	0.849432
FBgn0003714	tko	9.70827	1.28003	0.424069	NA	NA
FBgn0003716	tkv	13.8698	-0.155065	0.209236	0.458632	0.762023
FBgn0003719	tld	9.16305	-0.642257	0.505473	0.203869	0.575707
FBgn0003721	Tm1	13.1932	0.295864	0.259222	0.253723	0.625053
FBgn0003731	Egfr	13.02	-0.0330793	0.163597	0.839761	0.964811
FBgn0003733	tor	-0.193895	-2.27981	2.22703	0.305977	0.66239
FBgn0003741	tra	8.99585	-0.0278248	0.0990106	0.778689	0.932537
FBgn0003742	tra2	9.97518	0.452887	0.212307	0.0329111	0.275502
FBgn0003744	trc	10.8574	-0.0444222	0.0957724	0.642769	0.863258
FBgn0003747	Gr5a	11.288	0.285327	0.168432	0.090263	0.416
FBgn0003748	Treh	9.68671	-0.699801	0.268301	0.00910027	0.20054
FBgn0003751	trk	1.08268	-0.106228	1.25636	0.932617	1
FBgn0003862	trx	11.9593	-0.269431	0.310185	0.385059	0.717433
FBgn0003863	alphaTry	0.111411	0	3.73179	1	1
FBgn0003865	tsg	-1.19142	0.071894	3.79738	0.984895	1
FBgn0003866	tsh	11.6378	-0.0110402	0.180674	0.951275	1
FBgn0003867	tsl	10.3333	0.239803	0.222886	0.281972	0.643998
FBgn0003870	ttk	12.9742	0.37322	0.212187	0.0785909	0.396259
FBgn0003882	tub	10.1436	-0.406084	0.343739	0.237455	0.610193
FBgn0003884	alphaTub84B	16.1145	0.395657	0.180141	0.0280647	0.262648
FBgn0003885	alphaTub84D	11.7172	0.434561	0.140107	0.00192451	0.18081
FBgn0003886	alphaTub85E	8.2969	-0.770299	0.462477	0.0957944	0.426957
FBgn0003888	betaTub60D	13.1221	0.257021	0.412425	0.533157	0.801857
FBgn0003890	betaTub97EF	9.40495	0.426486	0.445675	0.338595	0.685072
FBgn0003891	tud	12.6154	-0.488769	0.312116	0.117352	0.462794
FBgn0003892	ptc	11.1549	0.248625	0.204857	0.224881	0.595717
FBgn0003896	tup	8.03378	0.20967	0.615355	0.733307	0.912581
FBgn0003900	twi	8.41135	0.370192	0.580905	0.52395	0.79771
FBgn0003922	snRNA:U2:38ABa	-0.239961	-1.69587	2.09301	0.417793	0.739343
FBgn0003930	snRNA:U4:39B	0.39934	-0.497658	1.31881	0.70591	0.898152
FBgn0003941	RpL40	14.6055	-0.0831313	0.138757	0.549096	0.813243
FBgn0003942	RpS27A	15.3234	-0.00949038	0.207428	0.963507	1
FBgn0003943	Ubi-p63E	12.3967	-0.227946	0.467686	0.625981	0.853134
FBgn0003944	Ubx	6.71981	1.55876	0.60052	0.00944037	0.20054
FBgn0003950	unc	5.3703	-0.816665	0.590032	0.166327	0.533876
FBgn0003963	ush	10.2118	0.615513	0.299729	0.0400179	0.293068
FBgn0003964	usp	10.7073	0.377374	0.197415	0.0559299	0.337578
FBgn0003965	v	2.6513	1.70148	2.57675	0.509048	0.791514
FBgn0003969	vap	11.0281	-0.379432	0.283581	0.180895	0.551295
FBgn0003975	vg	12.0614	0.788956	0.28115	0.00501333	0.20054
FBgn0003977	vir	10.8291	0.433928	0.215623	0.0441736	0.304806
FBgn0003978	vls	8.70033	0.69407	0.198888	0.000483456	0.114662
FBgn0003979	Vm26Aa	-1.28858	-0.519123	3.72722	0.88923	0.986246
FBgn0003984	vn	9.79155	-0.00393078	0.114716	0.972666	1
FBgn0003996	w	5.53803	0.573817	0.505417	0.256235	0.626957
FBgn0003997	hid	10.832	0.865264	0.304447	0.00448191	0.20054
FBgn0004003	wbl	11.4575	-0.479048	0.48099	0.319269	0.670123
FBgn0004034	y	0.288555	-0.975374	1.2552	0.437119	0.749677
FBgn0004045	Yp1	-0.803978	0.274579	3.91571	0.944096	1
FBgn0004047	Yp3	8.05273	0.893728	1.29327	NA	NA
FBgn0004049	yrt	11.6305	0.310135	0.178448	0.0822193	0.401617
FBgn0004050	z	10.8352	0.625467	0.205762	0.00236762	0.199862
FBgn0004055	uzip	9.94777	-0.625236	0.173252	0.000307597	0.0956788
FBgn0004057	Zw	8.85058	0.464195	0.178561	0.0093322	0.20054
FBgn0004066	Prosalpha4	11.7162	0.493135	0.212773	0.0204676	0.237171
FBgn0004087	Dhfr	9.02312	-0.325215	0.292607	0.26638	0.635428
FBgn0004101	bs	12.6681	0.823585	0.364243	0.0237537	0.248802
FBgn0004102	oc	0.271267	0.21867	1.97646	0.911904	0.993228
FBgn0004103	Pp1-87B	13.1424	-0.166632	0.105481	0.114168	0.458984
FBgn0004106	Cdk1	10.7312	-0.774068	0.676743	0.2527	0.624183
FBgn0004107	Cdk2	9.55955	-0.583292	0.369004	0.113942	0.458873
FBgn0004108	Nrt	12.5854	0.129726	0.327771	0.692265	0.890038
FBgn0004110	tin	1.21814	0.982258	1.60831	0.541371	0.806022
FBgn0004117	Tm2	5.51883	-1.47697	0.936783	0.114878	0.459512
FBgn0004118	nAChRbeta2	3.58962	-1.11181	0.665112	0.094601	0.425489
FBgn0004132	boca	10.7327	0.166175	0.152276	0.275152	0.640945
FBgn0004133	blow	11.1958	0.278466	0.175015	0.111587	0.455019
FBgn0004167	kst	12.7183	-0.272479	0.328302	0.406559	0.731769
FBgn0004168	5-HT1A	2.60321	-0.445359	0.740613	0.547615	0.812249
FBgn0004169	up	6.31016	-2.31724	0.786321	0.00320935	0.199862
FBgn0004170	sc	8.54332	-0.718671	0.841298	0.392971	0.723433
FBgn0004177	mts	13.359	0.0680646	0.110652	0.538473	0.804327
FBgn0004179	Csp	11.2795	0.120215	0.224518	0.59235	0.837702
FBgn0004192	snRNA:U2:34ABb	-0.790542	0.274573	3.34203	0.934521	1
FBgn0004197	Ser	12.3838	0.468908	0.220311	0.0333052	0.276104
FBgn0004198	ct	10.0071	0.395889	0.298332	0.184506	0.55423
FBgn0004227	nonA	12.1894	-0.132809	0.135878	0.328364	0.676532
FBgn0004228	mex1	-1.17117	-0.44677	2.4295	0.854097	0.970807
FBgn0004237	Hrb87F	13.0225	0.350578	0.142412	0.0138272	0.212325
FBgn0004240	DptA	1.37396	-0.585101	1.09741	0.593919	0.838241
FBgn0004242	Syt1	6.53921	0.355201	0.789506	0.652781	0.869198
FBgn0004244	Rdl	3.7731	0.402054	0.802275	0.616271	0.84918
FBgn0004359	T48	10.5762	0.370134	0.212457	0.0814811	0.401409
FBgn0004360	Wnt2	11.166	0.639542	0.41145	0.120098	0.466042
FBgn0004362	HmgD	14.1305	0.255014	0.180759	0.158304	0.525015
FBgn0004363	porin	13.5002	0.0383922	0.116766	0.74231	0.917026
FBgn0004364	18w	12.7747	0.123235	0.217336	0.570696	0.823885
FBgn0004367	mei-41	8.40058	0.0167269	0.264026	0.949485	1
FBgn0004368	Ptp4E	10.6287	-0.304844	0.27266	0.263552	0.633296
FBgn0004369	Ptp99A	10.6723	0.241159	0.152873	0.114677	0.459512
FBgn0004370	Ptp10D	11.4217	-0.183807	0.213158	0.38852	0.720101
FBgn0004373	fwd	11.2624	-0.241334	0.172007	0.160603	0.527225
FBgn0004374	neb	8.51468	0.263159	0.225179	0.242538	0.615722
FBgn0004378	Klp61F	10.3771	-0.278289	0.353551	0.431209	0.74636
FBgn0004379	Klp67A	9.74281	-0.250481	0.205448	0.22277	0.593708
FBgn0004380	Klp64D	8.7279	-0.504978	0.296351	0.0883836	0.414219
FBgn0004381	Klp68D	7.69307	-0.064136	0.134153	0.632593	0.858073
FBgn0004387	Klp98A	10.8779	-0.222258	0.218434	0.308914	0.664125
FBgn0004390	RasGAP1	11.1758	-0.128519	0.196712	0.513538	0.792948
FBgn0004391	shtd	10.013	0.249612	0.18328	0.173223	0.542384
FBgn0004394	pdm2	10.9968	-0.0660358	0.235993	0.779615	0.932977
FBgn0004395	unk	10.4629	-0.00141048	0.0854521	0.986831	1
FBgn0004396	CrebA	11.0475	0.503546	0.373269	0.177332	0.546925
FBgn0004397	Vinc	11.6586	0.710625	0.271038	0.00874491	0.20054
FBgn0004400	rhi	0.728513	-0.819862	1.00153	0.413011	0.736651
FBgn0004401	Pep	13.9224	0.730289	0.254129	0.00405697	0.20054
FBgn0004403	RpS14a	14.5257	0.987967	0.361192	0.00623238	0.20054
FBgn0004404	RpS14b	12.9569	0.684346	0.27691	0.0134596	0.210602
FBgn0004406	tam	8.19752	0.0619732	0.507588	0.902825	0.991191
FBgn0004419	me31B	11.8206	-0.666552	0.778904	0.392132	0.722961
FBgn0004425	LysB	1.64932	-0.629214	1.56216	0.687106	0.887795
FBgn0004426	LysC	0.247685	0.699928	2.99691	0.815334	0.952204
FBgn0004427	LysD	2.91372	0.605026	1.3952	0.664543	0.874524
FBgn0004428	LysE	0.818875	3.98126	3.08235	0.196485	0.567583
FBgn0004429	LysP	0.0786723	-2.19989	3.18867	0.490252	0.781104
FBgn0004430	LysS	2.0838	-1.21723	1.28814	0.344684	0.687697
FBgn0004431	LysX	-0.175012	1.34942	2.23113	0.545303	0.809836
FBgn0004432	Cyp1	14.7285	0.732976	0.283697	0.009776	0.202224
FBgn0004435	Galphaq	8.6239	1.74818	0.827462	NA	NA
FBgn0004436	Ubc6	10.9034	-0.509452	0.335772	0.129202	0.481452
FBgn0004449	Ten-m	13.1235	0.169999	0.192447	0.377045	0.71117
FBgn0004456	mew	11.7813	-0.157918	0.23091	0.494042	0.783139
FBgn0004463	RpIII128	9.42647	-0.331015	0.231003	0.151873	0.515804
FBgn0004465	Su(P)	9.25893	0.521044	0.212485	0.0142007	0.21393
FBgn0004507	GlyP	10.5535	-0.164437	0.419101	0.694795	0.892022
FBgn0004509	Fur1	10.698	0.497919	0.241674	0.0393706	0.291638
FBgn0004510	Ets97D	9.1307	0.0453182	0.139116	0.744607	0.917536
FBgn0004511	dy	5.79749	0.218532	0.619672	0.724345	0.909181
FBgn0004512	Mdr49	11.1859	-0.216668	0.210844	0.304128	0.660876
FBgn0004513	Mdr65	3.80535	-0.52649	0.71386	0.460803	0.764126
FBgn0004514	Oct-TyrR	0.0351341	-0.81249	1.69426	0.631545	0.857187
FBgn0004516	Gad1	-1.02659	3.07836	4.54907	0.498595	0.784739
FBgn0004552	Akh	2.62165	0.278914	0.842838	0.740703	0.916573
FBgn0004554	Edg91	5.48237	-0.390063	0.506798	0.441501	0.750707
FBgn0004556	Dbp73D	8.39168	-0.452861	0.317567	0.153859	0.518454
FBgn0004567	slp2	3.4259	-1.12273	0.831184	0.176772	0.546254
FBgn0004569	aos	8.66536	0.166475	0.194604	0.392301	0.722961
FBgn0004573	5-HT7	1.29168	-1.14897	0.906194	0.204833	0.576488
FBgn0004574	Rop	12.2577	0.140911	0.145307	0.332173	0.679405
FBgn0004575	Syn	5.25086	-0.118692	0.294414	0.686841	0.887749
FBgn0004577	Pxd	6.78212	-0.545935	0.425504	0.199482	0.571744
FBgn0004580	Cbp53E	1.79504	-0.686555	0.81983	0.402347	0.729073
FBgn0004581	bgcn	3.37168	-0.389778	0.506533	0.441596	0.750707
FBgn0004583	ex	12.638	-0.242991	0.197924	0.219561	0.590785
FBgn0004584	Rrp1	11.3647	-0.0244784	0.220433	0.911579	0.993173
FBgn0004587	B52	13.7104	0.552977	0.216622	0.0106884	0.204585
FBgn0004588	Eig71Ea	-0.976599	-1.76417	3.80844	0.643203	0.863393
FBgn0004592	Eig71Ee	1.51562	0	2.18252	1	1
FBgn0004595	pros	8.32035	0.552253	0.572049	0.334347	0.681989
FBgn0004597	CycC	9.13726	-0.386548	0.337365	0.251883	0.623249
FBgn0004598	Fur2	12.1294	0.179799	0.166424	0.279976	0.643086
FBgn0004606	zfh1	9.95226	0.491211	0.354334	0.165658	0.533359
FBgn0004607	zfh2	11.8779	-0.403052	0.445249	0.365345	0.702882
FBgn0004611	Plc21C	9.96767	-0.0438672	0.151809	0.772609	0.92999
FBgn0004618	gl	0.809828	-0.180084	1.43377	0.900047	0.990134
FBgn0004619	GluRIA	-0.965626	-1.7126	2.42287	0.479661	0.775346
FBgn0004620	GluRIIA	1.37947	-0.992445	1.13673	0.382627	0.71574
FBgn0004622	TkR99D	-0.0259103	-0.709002	1.8244	0.697556	0.893875
FBgn0004623	Gbeta76C	-0.930145	0.274568	2.92899	0.925314	0.998468
FBgn0004629	Cys	6.81055	-1.44309	0.64487	0.0252338	0.25398
FBgn0004635	rho	8.91795	0.743765	0.347027	0.0320931	0.273174
FBgn0004636	Rap1	11.7531	-0.0843283	0.13238	0.524113	0.79771
FBgn0004638	drk	11.2582	-0.600514	0.286112	0.0358278	0.283426
FBgn0004643	Zw10	10.4092	0.135563	0.184162	0.461665	0.764137
FBgn0004644	hh	11.0177	0.685912	0.273637	0.0121882	0.209107
FBgn0004646	ogre	13.6502	-0.283723	0.230723	0.218805	0.590418
FBgn0004647	N	13.8932	0.218448	0.18124	0.22809	0.599079
FBgn0004648	svr	11.3216	-0.375288	0.274271	0.171216	0.541565
FBgn0004650	fs(1)N	2.95767	-0.98366	0.553045	0.0753012	0.389622
FBgn0004652	fru	12.3183	0.114733	0.587401	0.84514	0.967483
FBgn0004654	Pgd	10.8018	0.632092	0.244319	0.0096772	0.201027
FBgn0004655	wapl	10.852	0.418446	0.2403	0.0816226	0.401409
FBgn0004656	fs(1)h	12.7636	0.600962	0.250913	0.0166157	0.22126
FBgn0004657	mys	12.2866	0.0870198	0.130467	0.504779	0.788788
FBgn0004687	Mlc-c	11.8857	0.729846	0.298762	0.0145697	0.21393
FBgn0004698	Xpc	10.8862	-0.340283	0.341122	0.318502	0.669518
FBgn0004777	Ccp84Ag	0.149618	0.394104	3.15216	0.900503	0.990134
FBgn0004780	Ccp84Ad	0.192956	2.86902	2.71953	0.291439	0.649683
FBgn0004782	Ccp84Ab	-1.42465	-0.446756	3.29207	0.892053	0.986524
FBgn0004783	Ccp84Aa	0.746449	3.80894	2.29058	0.0963384	0.427715
FBgn0004784	inaC	-0.79546	-2.9413	5.11851	0.565535	0.821307
FBgn0004795	retn	0.876428	0.312894	1.43923	0.827894	0.958255
FBgn0004797	mdy	8.95928	-0.982011	0.942822	0.297613	0.653985
FBgn0004811	fs(2)ltoPP43	10.1192	0.569454	0.238238	0.0168359	0.221974
FBgn0004828	His3.3B	14.5213	0.665209	0.262923	0.0114044	0.208048
FBgn0004832	Xpac	9.09334	0.730143	0.274249	0.0077601	0.20054
FBgn0004837	Su(H)	9.83387	0.0222237	0.09214	0.809404	0.949208
FBgn0004838	Hrb27C	14.3341	0.678695	0.270645	0.0121521	0.209107
FBgn0004839	otk	11.0253	-0.0635257	0.203439	0.754844	0.923437
FBgn0004841	TkR86C	1.03772	-2.72594	1.50355	0.0698309	0.37724
FBgn0004852	Ac76E	5.10826	-0.364136	0.465042	0.433617	0.747506
FBgn0004854	B-H2	6.60315	0.842956	0.54004	0.118544	0.463816
FBgn0004855	RpII15	9.67491	-0.0860251	0.280941	0.759449	0.925035
FBgn0004856	Bx42	10.8732	0.763357	0.306109	0.0126404	0.209715
FBgn0004858	elB	10.602	0.554832	0.247417	0.0249289	0.253144
FBgn0004859	ci	11.9343	-0.620246	0.674426	0.357748	0.697429
FBgn0004860	ph-d	10.4064	0.0761542	0.101921	0.454948	0.759746
FBgn0004861	ph-p	10.9958	0.0950072	0.12505	0.447403	0.755014
FBgn0004862	bap	-2.31462e-05	4.04268	5.11363	0.429196	0.744756
FBgn0004863	C15	7.03835	0.864074	0.563471	0.125157	0.474415
FBgn0004864	hop	10.5417	0.00535746	0.147497	0.971025	1
FBgn0004865	Eip78C	12.633	0.0188858	0.581531	0.974092	1
FBgn0004867	RpS2	15.4642	0.87365	0.32248	0.00674539	0.20054
FBgn0004868	Gdi	13.1568	0.408625	0.185475	0.0275858	0.261949
FBgn0004870	bab1	5.66633	0.336139	0.297096	0.257879	0.628111
FBgn0004872	piwi	3.37846	-3.17338	1.2053	0.00846715	0.20054
FBgn0004875	enc	11.2766	0.551207	0.242436	0.022989	0.246579
FBgn0004876	cdi	11.2334	0.0102448	0.145292	0.943786	1
FBgn0004878	cas	1.53239	-0.44677	1.67673	0.78989	0.939406
FBgn0004880	scrt	4.78758	0.263216	0.789249	0.738756	0.9151
FBgn0004882	orb	2.37007	-0.194572	0.721167	0.787313	0.937748
FBgn0004885	tok	12.2698	0.0967369	0.145721	0.506785	0.790519
FBgn0004888	Scsalpha1	11.7962	0.782927	0.303325	0.00984725	0.202224
FBgn0004889	tws	11.641	-0.0506179	0.155003	0.744001	0.917536
FBgn0004892	sob	9.07568	0.451686	0.349203	0.195846	0.566637
FBgn0004893	bowl	13.2882	0.301337	0.142244	0.0341372	0.279047
FBgn0004895	FoxL1	-1.26938	-0.44041	3.16995	0.889503	0.986246
FBgn0004897	fd96Ca	4.0988	0.662535	1.31099	0.613299	0.847857
FBgn0004898	fd96Cb	5.25549	-0.372014	1.29268	0.773512	0.92999
FBgn0004901	Prat	10.2136	-0.0116423	0.170736	0.945635	1
FBgn0004903	Rb97D	10.2525	0.242482	0.152349	0.111471	0.455019
FBgn0004907	14-3-3zeta	13.7572	-0.422065	0.354304	0.233555	0.605413
FBgn0004908	Arl2	8.33279	-0.679065	0.264978	0.0103856	0.204255
FBgn0004910	Eip63F-1	4.03457	-2.9898	1.11714	0.0074441	0.20054
FBgn0004913	Gnf1	10.2331	-0.245922	0.189444	0.194244	0.564814
FBgn0004914	Hnf4	9.68798	0.26324	0.196359	0.180049	0.550037
FBgn0004915	TfIIB	10.1999	-0.36672	0.3362	0.27537	0.640945
FBgn0004919	gol	5.30145	-0.534062	0.59248	0.367375	0.704207
FBgn0004921	Ggamma1	12.1421	0.60447	0.275472	0.0282132	0.262648
FBgn0004924	Top1	12.2505	-0.143981	0.154273	0.350674	0.693021
FBgn0004926	eIF2beta	12.3025	-0.0902445	0.153302	0.556081	0.817571
FBgn0004956	upd1	10.1868	0.478079	0.193197	0.0133399	0.210602
FBgn0004957	por	9.85566	0.620936	0.259532	0.016733	0.22136
FBgn0004959	phm	7.16388	0.782874	0.370308	0.0345056	0.279567
FBgn0005198	gig	10.4291	0.259873	0.152738	0.0888619	0.414539
FBgn0005278	Sam-S	12.4616	-0.345544	0.253053	0.172095	0.542025
FBgn0005322	nmd	9.5629	-0.506356	0.569202	0.373686	0.709067
FBgn0005355	Su(fu)	10.5413	0.256987	0.124583	0.0391343	0.290923
FBgn0005386	ash1	10.0083	-0.427639	0.397635	0.282171	0.643998
FBgn0005391	Yp2	1.98282	0.342075	0.723511	0.636357	0.86071
FBgn0005411	U2af50	11.7082	0.667735	0.266951	0.0123724	0.209107
FBgn0005427	ewg	10.7219	-0.0989914	0.196809	0.614976	0.848886
FBgn0005533	RpS17	14.861	0.0505304	0.154883	0.744236	0.917536
FBgn0005536	Mbs	11.2838	0.190182	0.122123	0.119399	0.465008
FBgn0005558	ey	4.07543	0.0625959	0.46185	0.892191	0.986524
FBgn0005561	sv	5.91302	-0.853669	1.11843	0.445299	0.753519
FBgn0005564	Shal	4.49294	1.82357	0.517967	0.000430523	0.108835
FBgn0005585	Calr	14.8752	0.09359	0.11576	0.418811	0.739757
FBgn0005586	Rab3	5.02828	-0.620106	0.652421	0.341875	0.686251
FBgn0005593	RpL7	15.5127	0.275459	0.168235	0.101559	0.437534
FBgn0005596	yem	9.95046	0.312534	0.143852	0.0298096	0.266504
FBgn0005612	Sox14	10.3275	0.508037	0.308724	0.0998458	0.435585
FBgn0005613	Sox15	10.82	0.48121	0.222644	0.0306689	0.269338
FBgn0005616	msl-2	9.18657	0.382132	0.159667	0.0166974	0.22126
FBgn0005617	msl-1	9.76996	-0.345931	0.259231	0.182057	0.551295
FBgn0005619	Hdc	2.05766	-0.146848	1.2392	0.90567	0.992033
FBgn0005624	Psc	10.7373	0.325967	0.182888	0.0746959	0.389209
FBgn0005626	ple	5.63863	-0.0772908	0.663733	0.907297	0.992239
FBgn0005631	robo1	11.0971	0.152199	0.227047	0.50264	0.787332
FBgn0005632	faf	12.2478	-0.158764	0.203658	0.435649	0.749053
FBgn0005633	fln	-1.38132	-0.941096	2.70442	0.727852	0.910438
FBgn0005636	nvy	7.98351	0.891334	0.389418	0.022086	0.243218
FBgn0005638	slbo	2.18623	2.82052	1.30053	0.0301016	0.267658
FBgn0005640	Eip63E	10.6611	-0.0983587	0.122502	0.422024	0.741978
FBgn0005642	wdn	9.98333	0.219274	0.147198	0.136314	0.493078
FBgn0005648	Pabp2	12.309	0.472671	0.235621	0.0448497	0.30714
FBgn0005649	Rox8	12.477	0.56899	0.227378	0.0123355	0.209107
FBgn0005655	PCNA	11.1308	-0.0573262	0.219135	0.793628	0.941363
FBgn0005658	Ets65A	4.52482	0.0556828	0.285188	0.845197	0.967483
FBgn0005659	Ets98B	8.8519	0.345357	0.23257	0.137555	0.49433
FBgn0005660	Ets21C	6.56517	0.606209	0.354551	0.087304	0.413194
FBgn0005664	Crys	5.14263	-2.47067	1.39633	0.0768276	0.392167
FBgn0005666	bt	5.93287	-2.5268	1.00324	0.0117811	0.209088
FBgn0005670	Cyp4d1	5.37417	0.705172	2.16882	0.745074	0.917561
FBgn0005671	Vha55	11.5226	0.0775181	0.0871547	0.373772	0.709067
FBgn0005672	spi	12.1765	0.795917	0.291954	0.00640738	0.20054
FBgn0005674	GluProRS	12.5661	0.00173052	0.108195	0.987239	1
FBgn0005677	dac	9.67506	0.688369	0.433586	0.112373	0.456904
FBgn0005683	pie	7.28632	-0.277887	0.223717	0.214186	0.586063
FBgn0005694	Aef1	10.12	0.146001	0.13499	0.279443	0.642916
FBgn0005695	gcl	8.59405	-0.0687706	0.152905	0.652884	0.869237
FBgn0005696	DNApol-alpha73	7.84167	-0.217392	0.4001	0.586893	0.834681
FBgn0005771	noc	11.6463	0.792464	0.299939	0.00823979	0.20054
FBgn0005775	Con	8.2993	0.271544	0.653339	0.677684	0.882127
FBgn0005777	PpD3	9.94294	-0.374899	0.208444	0.072089	0.383076
FBgn0008635	betaCOP	12.7617	0.357299	0.201749	0.0765596	0.392167
FBgn0008646	E5	10.0934	0.712921	0.31265	0.0225929	0.244326
FBgn0008651	lbl	2.35413	-2.10801	1.59544	0.186412	0.555368
FBgn0010014	CanB	3.90347	-0.573018	0.384082	0.135722	0.491912
FBgn0010015	CanA1	-0.268974	-1.228	3.11578	0.693491	0.890985
FBgn0010019	Cyp4g1	2.22182	1.58229	1.17055	0.176454	0.54599
FBgn0010038	GstD2	5.77063	-0.470447	0.557631	0.398863	0.727531
FBgn0010039	GstD3	9.84046	-0.707637	0.808465	0.381419	0.71451
FBgn0010040	GstD4	2.6076	-1.24342	0.908602	0.171156	0.541565
FBgn0010041	GstD5	6.28332	1.37973	0.639818	0.0310493	0.270127
FBgn0010042	GstD6	0.406916	-0.418457	2.60484	0.872372	0.979151
FBgn0010043	GstD7	0.599321	-0.487267	1.6048	0.76141	0.925721
FBgn0010051	Itpr	11.2881	-0.128498	0.181519	0.479005	0.775346
FBgn0010052	Jhe	1.55667	-1.81495	1.09153	0.0963626	0.427715
FBgn0010053	Jheh1	7.24792	-0.570468	0.575287	0.321381	0.671142
FBgn0010078	RpL23	15.4111	0.964053	0.35302	0.00631675	0.20054
FBgn0010097	gammaTub37C	1.29283	1.46922	1.17452	0.210968	0.583455
FBgn0010100	mAcon1	12.3901	0.124918	0.0915687	0.172505	0.542025
FBgn0010105	comm	7.76173	0.0108774	0.188177	0.953905	1
FBgn0010109	dpn	8.91277	0.649122	0.360143	0.0714822	0.381454
FBgn0010113	hdc	12.2095	0.454177	0.268602	0.0908575	0.416577
FBgn0010114	hig	3.0228	-0.0393412	0.793863	0.960476	1
FBgn0010173	RpA-70	11.0132	-0.548287	0.308049	0.0750974	0.389542
FBgn0010194	Wnt5	11.6468	0.67318	0.27364	0.01389	0.212325
FBgn0010197	Gyc32E	2.12564	0.126264	0.919958	0.890834	0.986524
FBgn0010198	RpS15Aa	14.6362	-0.1884	0.115041	0.101489	0.437534
FBgn0010213	Sod2	10.6909	0.477769	0.213821	0.0254543	0.25473
FBgn0010215	alpha-Cat	11.2076	-0.166893	0.960039	NA	NA
FBgn0010217	ATPsynbeta	13.8495	-0.466375	0.468907	0.319931	0.670257
FBgn0010220	Dbp45A	8.77886	0.0798393	0.206266	0.698705	0.893991
FBgn0010222	Nmdmc	9.01492	0.0748562	0.322302	0.81634	0.953096
FBgn0010223	Galphaf	2.41378	0.943325	0.850837	0.267559	0.635943
FBgn0010225	Gel	11.667	0.0963084	0.215521	0.654974	0.870171
FBgn0010226	GstS1	13.0366	0.568846	0.180599	0.00163398	0.175579
FBgn0010228	HmgZ	12.6642	-0.131727	0.143014	0.357011	0.697332
FBgn0010235	Klc	11.2064	-0.262363	0.154871	0.0902518	0.416
FBgn0010238	Lac	13.6423	0.32327	0.153718	0.0354654	0.281911
FBgn0010240	Lcch3	4.79772	-1.14365	0.46003	0.0129172	0.210548
FBgn0010241	Mdr50	1.18862	-0.571852	1.34176	0.669966	0.877801
FBgn0010246	Myo61F	9.81749	-0.141527	0.167251	0.397444	0.726424
FBgn0010247	Parp	10.0441	0.593341	0.923258	NA	NA
FBgn0010258	Rbp4	4.55472	-0.384079	0.446437	0.389612	0.720628
FBgn0010263	Rbp9	6.40111	0.429774	0.417396	0.303173	0.659838
FBgn0010265	RpS13	15.2509	-0.0976214	0.158258	0.537334	0.803858
FBgn0010269	Dsor1	10.1853	0.334717	0.127275	0.00854162	0.20054
FBgn0010278	Ssrp	11.5796	-0.0155253	0.169272	0.926922	0.998795
FBgn0010280	Taf4	11.909	0.360485	0.15984	0.0241153	0.2498
FBgn0010282	TfIIFalpha	10.8205	0.375869	0.143175	0.00865904	0.20054
FBgn0010287	Trf	8.15267	-0.0266107	0.148762	0.858031	0.972644
FBgn0010288	Uch	11.0157	-0.135593	0.213025	0.524442	0.797903
FBgn0010292	bys	9.75048	-0.235812	0.179922	0.189981	0.560176
FBgn0010300	brat	12.8588	0.228248	0.118566	0.0542202	0.333099
FBgn0010303	hep	10.8586	0.541105	0.242887	0.0258934	0.255098
FBgn0010309	pigeon	9.02229	0.0701089	0.131955	0.595205	0.838368
FBgn0010313	corto	11.7894	0.766355	0.285264	0.00722102	0.20054
FBgn0010314	Cks30A	9.79045	-0.614368	0.393235	0.118206	0.463816
FBgn0010315	CycD	10.0007	-0.191541	0.177164	0.279631	0.642916
FBgn0010316	dap	10.0381	-0.231954	0.205173	0.258254	0.628229
FBgn0010317	CycJ	-1.02666	-0.895585	2.7137	0.741382	0.916775
FBgn0010328	woc	12.458	0.44595	0.221183	0.0437782	0.303711
FBgn0010329	Tbh	0.449423	-1.73131	1.65604	0.295816	0.652583
FBgn0010333	Rac1	11.2325	0.175052	0.125569	0.163295	0.529969
FBgn0010339	128up	10.637	0.0740681	0.0796385	0.352343	0.694255
FBgn0010340	140up	7.88913	-0.0163261	0.244855	0.946839	1
FBgn0010341	Cdc42	12.4059	-0.148331	0.131899	0.260768	0.631432
FBgn0010342	Map60	11.6261	0.0503004	0.0994885	0.613145	0.847857
FBgn0010348	Arf79F	13.4073	-0.331539	0.338887	0.327918	0.67632
FBgn0010350	Cds	9.39157	-0.565119	0.239209	0.0181546	0.227799
FBgn0010352	Nc73EF	11.1538	0.403762	0.204827	0.0486967	0.317132
FBgn0010355	Taf1	11.4553	-0.144414	0.204953	0.481048	0.776243
FBgn0010356	Taf5	9.55759	-0.171389	0.153495	0.264174	0.633888
FBgn0010357	betaTry	0.336835	0	4.99863	1	1
FBgn0010379	Akt1	11.323	-0.248073	0.156393	0.11269	0.456904
FBgn0010380	AP-1-2beta	11.9097	0.400528	0.199208	0.0443672	0.305455
FBgn0010382	CycE	9.68636	0.54981	0.265509	0.0383792	0.288468
FBgn0010383	Cyp18a1	6.10326	0.70327	0.659208	0.286044	0.646829
FBgn0010385	Def	4.46382	0.933994	0.700053	0.182146	0.551295
FBgn0010387	Acbp2	3.72091	-0.831457	2.23895	NA	NA
FBgn0010388	Dro	3.28891	2.7578	0.705335	9.23266e-05	0.0567952
FBgn0010389	htl	8.15686	-0.862002	0.467544	0.0652298	0.36452
FBgn0010391	SrpRalpha	11.6733	0.160484	0.151307	0.288849	0.647733
FBgn0010395	Itgbn	2.49362	-0.371365	0.835531	0.656706	0.87099
FBgn0010397	LamC	9.65149	0.522373	0.414974	0.208099	0.580126
FBgn0010398	Lrr47	7.69412	-0.458574	0.477531	0.336903	0.683706
FBgn0010399	Nmdar1	3.63194	0.704898	0.555038	0.204085	0.575707
FBgn0010401	Os-C	5.1752	-0.451166	0.42826	0.292118	0.650252
FBgn0010406	RNaseX25	9.71149	-0.520508	0.306817	0.0897957	0.414608
FBgn0010407	Ror	4.06418	-1.36639	0.909057	0.132817	0.48679
FBgn0010408	RpS9	15.0509	0.503297	0.228365	0.0275304	0.261949
FBgn0010409	RpL18A	15.173	0.431402	0.220293	0.0501939	0.320525
FBgn0010411	RpS18	14.7508	0.00316867	0.161276	0.984325	1
FBgn0010412	RpS19a	15.1795	0.624123	0.259162	0.0160299	0.218036
FBgn0010414	SerT	4.86955	0.108804	0.700074	0.876492	0.980795
FBgn0010415	Sdc	12.8101	0.100283	0.12542	0.423958	0.742948
FBgn0010416	TH1	10.2703	-0.494361	0.310734	0.111622	0.455019
FBgn0010417	Taf6	10.1553	-0.0228073	0.109522	0.835039	0.962192
FBgn0010421	TfIIFbeta	9.32538	-0.337862	0.188032	0.0723623	0.383897
FBgn0010422	TfIIS	10.8827	-0.0435876	0.119449	0.715181	0.903532
FBgn0010423	TpnC47D	0.719513	-0.446756	2.24498	0.842261	0.966193
FBgn0010424	TpnC73F	5.66479	-1.8606	0.657814	0.00467733	0.20054
FBgn0010431	mtrm	0.892513	-0.828308	1.02824	0.420497	0.740929
FBgn0010433	ato	3.02769	0.966587	1.45836	0.507465	0.79086
FBgn0010434	cora	13.392	-0.0714376	0.132237	0.589042	0.835238
FBgn0010435	emp	12.0737	-0.215276	0.157457	0.17156	0.542025
FBgn0010438	mtSSB	9.00206	0.222712	0.157177	0.156499	0.52266
FBgn0010441	pll	9.72095	0.123347	0.121735	0.310944	0.665061
FBgn0010452	trn	11.7074	-0.164499	0.155681	0.290674	0.649683
FBgn0010453	Wnt4	9.96617	0.5254	0.505347	0.298488	0.654675
FBgn0010470	Fkbp14	11.6363	-0.228895	0.36326	0.528621	0.800704
FBgn0010473	tutl	12.419	0.0282937	0.160799	0.860327	0.973648
FBgn0010482	l(2)01289	2.89494	-2.56765	1.03054	0.0127189	0.209968
FBgn0010488	NAT1	14.1282	0.124857	0.183943	0.497276	0.784402
FBgn0010497	dmGlut	8.06016	-0.189864	0.15676	0.225827	0.597
FBgn0010501	Dcp-1	10.6908	-0.215865	0.161631	0.181699	0.551295
FBgn0010504	kermit	9.5831	0.148071	0.127133	0.244142	0.61688
FBgn0010516	wal	10.6406	0.0950597	0.120333	0.429544	0.744895
FBgn0010520	Bka	8.19806	-0.0937729	0.131149	0.474604	0.772171
FBgn0010531	Ccs	8.30213	-0.325044	0.220147	0.139813	0.498263
FBgn0010548	Aldh-III	11.4863	0.0939032	0.107045	0.38036	0.713544
FBgn0010549	l(2)03659	6.5055	-0.0261657	0.36681	0.943133	1
FBgn0010551	Phb2	11.9011	0.156842	0.095311	0.0998508	0.435585
FBgn0010583	dock	10.2146	0.292365	0.149692	0.0508074	0.322047
FBgn0010590	Prosbeta1	11.6749	1.04006	0.339897	0.00221396	0.19582
FBgn0010591	Sply	9.87556	0.227801	0.101291	0.0245134	0.251082
FBgn0010602	lwr	12.7045	0.6603	0.272311	0.0153168	0.215273
FBgn0010607	l(2)05714	8.6909	-0.818749	0.469384	0.0811061	0.401287
FBgn0010611	Hmgs	9.81063	0.212337	0.122599	0.0832811	0.404264
FBgn0010612	ATPsynG	11.7052	0.809739	0.325481	0.0128529	0.210417
FBgn0010620	CG10939	11.8716	-0.130376	0.196883	0.507842	0.791078
FBgn0010621	CCT5	12.7858	0.317994	0.154942	0.0401369	0.293568
FBgn0010622	DCTN3-p24	9.51392	0.906628	0.324748	0.00524176	0.20054
FBgn0010638	Sec61beta	12.7067	0.892844	0.341761	0.00898877	0.20054
FBgn0010651	MFS14	9.32533	-0.162433	0.203102	0.423849	0.742948
FBgn0010660	Nup214	11.1625	-0.00887753	0.181656	0.961023	1
FBgn0010741	Pfdn2	10.9361	-0.590017	0.339151	0.0819142	0.401409
FBgn0010747	Srp54k	11.3648	-0.239375	0.269935	0.375192	0.710132
FBgn0010750	atms	10.3066	0.196368	0.115092	0.0879738	0.413788
FBgn0010762	simj	11.4343	0.41749	0.240137	0.0821145	0.401409
FBgn0010768	sqz	9.12263	0.414346	0.209025	0.0474486	0.31367
FBgn0010770	ppan	9.09853	0.283697	0.178963	0.112916	0.456904
FBgn0010772	Xe7	12.0145	-0.025935	0.103268	0.801705	0.946229
FBgn0010774	Ref1	12.901	1.16703	0.394639	NA	NA
FBgn0010786	l(3)02640	9.52625	0.212513	0.122757	0.0834209	0.40461
FBgn0010803	TrpRS	9.6448	-0.306923	0.238551	0.198229	0.570229
FBgn0010808	Chchd3	10.0474	0.427059	0.184297	0.0204909	0.237171
FBgn0010812	unc-45	9.56349	0.0679353	0.210099	0.746431	0.918947
FBgn0010825	Gug	12.5094	0.538945	0.24708	0.0291641	0.264356
FBgn0010830	l(3)04053	9.74755	0.296677	0.163389	0.0694053	0.376093
FBgn0010877	l(3)05822	10.5601	0.507095	0.220143	0.021252	0.239923
FBgn0010894	sinu	11.0346	-0.131733	0.123274	0.285241	0.646528
FBgn0010905	Spn	12.1056	0.113225	0.286034	0.692219	0.890038
FBgn0010909	msn	12.9411	0.390789	0.215237	0.0694277	0.376093
FBgn0010926	l(3)07882	9.59868	-0.203183	0.122884	0.0982394	0.432531
FBgn0011016	SsRbeta	12.3349	0.208253	0.184614	0.259301	0.62961
FBgn0011020	Sas-4	8.9995	0.185776	0.111015	0.094241	0.424516
FBgn0011202	dia	10.421	0.0372077	0.148098	0.801632	0.946229
FBgn0011204	cue	9.61045	0.12737	0.172825	0.461129	0.764137
FBgn0011205	fbl	10.0706	-0.314973	0.348649	0.366308	0.70334
FBgn0011206	bol	5.42559	-0.0911923	0.418361	0.827449	0.957834
FBgn0011207	pelo	9.90629	-0.156506	0.343376	0.648543	0.866679
FBgn0011211	blw	14.2027	0.634903	0.248742	0.0106966	0.204585
FBgn0011217	eff	13.0676	0.439921	0.348909	0.207364	0.57953
FBgn0011224	heph	14.2138	0.855665	0.315794	0.00673708	0.20054
FBgn0011225	jar	13.8485	0.0561521	0.229291	0.806539	0.948106
FBgn0011227	ox	9.13027	-0.168618	0.187664	0.368912	0.705247
FBgn0011230	poe	12.7584	-0.420814	0.350488	0.229886	0.601029
FBgn0011232	scat	9.20223	-0.38867	0.235181	0.0984035	0.433034
FBgn0011236	ken	9.22534	0.171458	0.373678	0.64635	0.86516
FBgn0011259	Sema1a	10.0896	0.456472	0.209129	0.0290559	0.264356
FBgn0011260	Sema2a	13.3846	-0.332706	0.206584	0.107285	0.448978
FBgn0011272	RpL13	15.2461	1.16583	0.395772	0.00322209	0.199862
FBgn0011274	Dif	7.46	-0.264083	0.298002	0.375521	0.710467
FBgn0011279	Obp69a	2.79605	0.699215	0.588242	0.234577	0.606709
FBgn0011280	Obp19d	-0.802312	2.4402	3.03054	0.420703	0.741089
FBgn0011282	Obp84a	2.72319	0.102014	0.615495	0.868359	0.977245
FBgn0011283	Obp28a	-0.964894	0.274551	5.20139	0.957904	1
FBgn0011284	RpS4	15.6467	0.0992728	0.14254	0.486144	0.778515
FBgn0011286	RyR	6.30028	-0.73389	0.380176	0.053558	0.330976
FBgn0011288	Snap25	1.77319	0.910518	1.24193	0.463467	0.765395
FBgn0011289	TfIIA-L	10.7758	0.224837	0.108322	0.0379277	0.287744
FBgn0011290	Taf12	10.3599	0.824909	0.308296	0.00745729	0.20054
FBgn0011291	Taf11	9.07106	-0.124876	0.289506	0.666219	0.875259
FBgn0011296	l(2)efl	3.99825	-0.72884	0.817614	0.372702	0.70814
FBgn0011297	Alg3	9.69324	0.552072	0.199885	0.00574584	0.20054
FBgn0011300	babo	12.1521	0.297106	0.196234	0.130016	0.482107
FBgn0011305	Rsf1	12.0745	1.01916	0.343728	0.00302665	0.199862
FBgn0011327	Uch-L5	10.8868	-0.590173	0.393651	0.133814	0.488777
FBgn0011335	vers	8.62804	-0.468875	0.315728	0.137528	0.49433
FBgn0011336	Stt3B	11.8751	-0.0517152	0.275803	0.851263	0.969471
FBgn0011361	ND-ACP	10.6718	0.587576	0.249768	0.0186483	0.230608
FBgn0011455	ND-SGDH	10.2652	1.05893	0.362628	0.00349861	0.20054
FBgn0011474	PR-Set7	10.4483	-0.171506	0.108391	0.113585	0.458373
FBgn0011476	l(3)neo43	6.7437	-0.757143	0.517501	0.143447	0.503775
FBgn0011481	Ssdp	11.6903	1.01136	0.364679	0.00554923	0.20054
FBgn0011509	SrpRbeta	10.2376	-0.352661	0.28741	0.219811	0.590785
FBgn0011566	Smyd3	8.66249	-0.0664994	0.169364	0.694584	0.891905
FBgn0011569	can	-1.42208	-0.446723	4.80582	0.92594	0.998504
FBgn0011570	cpb	11.4713	-0.0263975	0.0808711	0.744111	0.917536
FBgn0011573	Cdc37	11.132	-0.0589436	0.13422	0.660548	0.872489
FBgn0011576	Cyp4d2	7.03474	-0.128004	0.374336	0.732389	0.912111
FBgn0011581	Ms	-0.652454	-3.852	5.11629	0.451516	0.757117
FBgn0011582	Dop1R1	0.355867	-1.93596	2.0863	0.353439	0.694599
FBgn0011584	Trp1	11.5276	-0.55114	0.349077	0.11437	0.458984
FBgn0011586	e(r)	10.1432	-0.656818	0.30569	0.0316628	0.272027
FBgn0011589	Elk	3.15815	1.58063	0.883646	0.0736536	0.387444
FBgn0011591	fng	12.684	0.11228	0.0761599	0.140411	0.498395
FBgn0011592	fra	12.0249	-0.094745	0.323173	0.769391	0.929573
FBgn0011596	fzo	-0.835976	-1.09934	2.51807	0.662415	0.87366
FBgn0011603	ine	5.41884	0.131026	0.381726	0.731412	0.911662
FBgn0011604	Iswi	11.7734	-0.495446	0.339967	0.145024	0.505743
FBgn0011606	Klp3A	11.019	0.5408	0.192029	0.00485885	0.20054
FBgn0011638	La	11.6722	0.361858	0.175819	0.0395783	0.291766
FBgn0011640	lark	12.5946	0.747405	0.305707	0.0144916	0.21393
FBgn0011642	Zyx	10.4938	0.108364	1.20555	NA	NA
FBgn0011648	Mad	11.3488	0.0832129	0.0836617	0.319914	0.670257
FBgn0011653	mas	12.3462	-0.0653549	0.113535	0.564861	0.820909
FBgn0011655	Med	11.3935	0.761476	0.282405	0.00700938	0.20054
FBgn0011656	Mef2	10.2345	0.320786	0.200631	0.109845	0.453026
FBgn0011659	Mlh1	7.93612	0.00113903	0.443583	0.997951	1
FBgn0011660	Pms2	8.52904	-0.317616	0.483645	0.511366	0.792573
FBgn0011661	Moe	13.3109	0.505414	0.248143	0.0416712	0.298879
FBgn0011666	msi	10.6595	0.952928	0.29764	0.00136661	0.173292
FBgn0011672	Mvl	10.0528	-0.149134	0.268057	0.57797	0.829682
FBgn0011674	insc	7.8278	0.357446	0.391444	0.361165	0.699797
FBgn0011676	Nos	-0.0107228	0.23627	1.88823	0.900422	0.990134
FBgn0011692	pav	10.7655	-0.00558816	0.211503	0.978921	1
FBgn0011693	Pdh	3.59076	4.50748	1.21231	NA	NA
FBgn0011695	EbpIII	8.25954	-0.0447788	0.496905	0.928195	0.999205
FBgn0011701	repo	7.05427	0.719715	0.444915	0.105739	0.445097
FBgn0011703	RnrL	10.894	-0.569017	0.40953	0.164699	0.531607
FBgn0011704	RnrS	10.6867	-0.524299	0.272241	0.0541215	0.332666
FBgn0011705	rost	7.86357	-0.603709	0.388767	0.120451	0.466798
FBgn0011706	rpr	7.53172	-0.622901	0.261245	0.0171091	0.222985
FBgn0011708	Syx5	9.92008	0.0179976	0.107426	0.86695	0.976682
FBgn0011710	2024-09-01	11.7248	0.319163	0.12869	0.0131349	0.210602
FBgn0011715	Snr1	10.9126	-0.00607667	0.135093	0.964122	1
FBgn0011722	Tig	7.69254	-0.0759464	0.637675	0.905197	0.992033
FBgn0011725	twin	11.0327	0.0271232	0.0769751	0.724566	0.90925
FBgn0011726	tsr	13.6643	-0.595115	0.505517	0.239099	0.611175
FBgn0011737	Wee1	9.62738	0.226721	0.107571	0.0350617	0.280618
FBgn0011739	wts	11.1301	0.306882	0.219588	0.162253	0.52862
FBgn0011740	alpha-Man-IIa	11.1916	-0.267769	0.303891	0.378245	0.71181
FBgn0011741	Arp6	10.3608	-0.00246695	0.0911764	0.978414	1
FBgn0011742	Arp2	11.4378	-0.356986	0.200114	0.0744385	0.388632
FBgn0011745	Arp1	11.4641	0.0230646	0.14585	0.874347	0.979724
FBgn0011746	ana	9.76118	-0.0634778	0.4629	0.890928	0.986524
FBgn0011747	Ank	11.8685	-0.937205	0.782678	0.231138	0.602702
FBgn0011754	PhKgamma	10.6491	0.0417615	0.103211	0.685756	0.887346
FBgn0011758	B-H1	6.7442	0.640102	0.402538	0.111797	0.455199
FBgn0011760	ctp	12.7501	-0.378391	0.440512	0.390352	0.721057
FBgn0011762	DNApol-alpha50	7.52841	-0.252534	0.541863	0.641182	0.862399
FBgn0011763	Dp	11.6216	0.11785	0.0920912	0.200646	0.573275
FBgn0011766	E2f1	11.9436	0.680524	0.282638	0.016051	0.218072
FBgn0011768	Fdh	11.6942	1.00046	0.278909	0.000334434	0.0972295
FBgn0011769	Fdx1	7.14118	-0.0835628	0.419938	0.842272	0.966193
FBgn0011770	Gip	9.84772	-0.355286	0.255556	0.164453	0.531104
FBgn0011771	Hem	10.6503	-0.629502	0.457057	0.168422	0.537303
FBgn0011774	Irbp	7.76181	-0.0204733	0.363682	0.955107	1
FBgn0011785	BRWD3	11.8602	0.14416	0.177358	0.416324	0.738246
FBgn0011787	mRpL12	9.99041	1.01756	0.365333	0.0053478	0.20054
FBgn0011802	Gem3	8.7461	-0.617834	0.665987	0.353565	0.694671
FBgn0011817	nmo	11.3295	0.228723	0.23475	0.329895	0.677325
FBgn0011818	oaf	9.24625	0.651616	0.255502	0.010762	0.205044
FBgn0011824	CG4038	10.8614	1.33833	0.440625	NA	NA
FBgn0011826	Pp2B-14D	10.6723	0.351428	0.162578	0.0306499	0.269338
FBgn0011828	Pxn	10.0243	0.337236	0.272745	0.216291	0.588947
FBgn0011829	Ret	7.45989	-0.533052	0.326557	0.102607	0.439109
FBgn0011836	Taf2	9.92271	-0.421727	0.335369	0.208572	0.58076
FBgn0011837	Tis11	10.2803	0.511286	0.302054	0.0905134	0.416119
FBgn0011916	tRNA:Met-CAT-1-2	-0.0998016	0.324306	1.7542	0.853328	0.970472
FBgn0012034	AcCoAS	6.79158	-0.202083	0.537914	0.707155	0.898771
FBgn0012036	Aldh	10.914	0.0913008	0.510647	0.858099	0.972644
FBgn0012037	Ance	12.7189	-0.180737	0.366525	0.621936	0.851073
FBgn0012042	AttA	3.4634	1.40058	0.895221	0.117698	0.463279
FBgn0012051	CalpA	10.256	-0.494383	0.457744	0.280124	0.643175
FBgn0012058	Cdc27	10.5483	0.0100738	0.134738	0.940401	1
FBgn0013263	Trl	7.26052	-0.125419	0.570418	0.825971	0.957374
FBgn0013269	Fkbp39	12.2905	0.286936	0.184897	0.120694	0.467124
FBgn0013272	Gp150	14.2053	-0.419515	0.251382	0.0951498	0.426334
FBgn0013275	Hsp70Aa	3.8364	-0.474134	1.29178	0.713589	0.902917
FBgn0013276	Hsp70Ab	4.95386	-0.982837	1.0739	0.360086	0.699192
FBgn0013277	Hsp70Ba	1.447	-2.06661	1.85222	0.26453	0.634081
FBgn0013278	Hsp70Bb	5.70717	-1.88434	2.52693	0.455846	0.760383
FBgn0013279	Hsp70Bc	5.73255	0.468094	1.27819	0.714202	0.903208
FBgn0013303	Nca	9.25523	-1.25833	1.06685	0.238205	0.610675
FBgn0013305	Nmda1	10.1002	-0.389637	0.225574	0.0841113	0.406117
FBgn0013307	Odc1	3.04462	-1.69812	2.02319	0.401286	0.728795
FBgn0013308	Odc2	0.138983	0	2.55342	1	1
FBgn0013323	Ptth	2.44737	0.820777	0.613919	0.18124	0.551295
FBgn0013325	RpL11	14.9778	0.437519	0.223137	0.0499063	0.319551
FBgn0013334	Sap47	10.5934	0.565925	0.270771	0.0366135	0.285094
FBgn0013342	nSyb	6.72785	0.746412	0.360288	0.0382925	0.288468
FBgn0013343	Syx1A	9.29892	-0.195243	0.286478	0.495535	0.783366
FBgn0013347	TfIIA-S	10.8663	-0.177989	0.259324	0.492488	0.782833
FBgn0013348	TpnC41C	-0.981032	-1.39403	2.10208	0.507224	0.790761
FBgn0013432	bcn92	8.9905	-0.167569	0.180264	0.352591	0.694258
FBgn0013433	beat-Ia	1.09767	-0.318439	1.1206	0.776282	0.931538
FBgn0013435	Cdc2rk	8.89076	-0.124171	0.156576	0.427755	0.744384
FBgn0013467	igl	4.85725	0.72574	0.580101	0.210914	0.583455
FBgn0013469	klu	11.1694	0.716213	0.300399	0.0171163	0.222985
FBgn0013531	MED20	8.37333	-0.11505	0.121037	0.341841	0.686251
FBgn0013548	l(2)dtl	9.04018	0.797394	0.370484	0.0313736	0.270988
FBgn0013563	Pex1	8.02789	-0.612963	0.311096	0.0487998	0.317279
FBgn0013576	mtd	11.5598	0.223432	0.19347	0.248146	0.621284
FBgn0013672	NA	13.3192	4.59624	0.881811	NA	NA
FBgn0013673	NA	1.10955	3.77681	1.99834	0.0587615	0.345038
FBgn0013674	NA	15.8107	5.08285	0.931646	NA	NA
FBgn0013675	NA	14.0796	5.10617	0.930958	NA	NA
FBgn0013676	NA	15.3695	5.24615	0.930226	NA	NA
FBgn0013678	NA	14.4362	5.16265	0.929365	NA	NA
FBgn0013679	NA	13.0853	4.89575	0.919131	NA	NA
FBgn0013680	NA	6.76888	4.04927	0.929059	NA	NA
FBgn0013681	NA	11.898	5.48909	1.13545	NA	NA
FBgn0013683	NA	2.35907	-1.46421	1.3785	0.288156	0.647406
FBgn0013684	NA	12.5665	4.76966	0.92175	2.28432e-07	0.000450011
FBgn0013685	NA	3.8801	4.12773	1.1323	0.00026695	0.0928045
FBgn0013686	NA	18.4289	5.51839	0.959739	NA	NA
FBgn0013688	NA	6.85865	3.86154	1.14503	0.000745067	0.133925
FBgn0013689	NA	2.55786	0	1.51677	1	1
FBgn0013690	NA	-1.43205	0	5.20139	1	1
FBgn0013694	NA	1.57301	0	1.65634	1	1
FBgn0013699	NA	1.91747	0	1.70542	1	1
FBgn0013704	NA	-0.43472	0	3.76737	1	1
FBgn0013709	NA	0.575222	0	3.20223	1	1
FBgn0013710	NA	0.519122	0	1.86645	1	1
FBgn0013717	not	10.8899	0.49352	0.222257	0.0263856	0.257259
FBgn0013718	nuf	11.1778	0.217157	0.162081	0.180309	0.55039
FBgn0013720	pck	11.7391	0.239349	0.135773	0.0779244	0.394969
FBgn0013725	phyl	5.35947	0.502114	0.459229	0.274225	0.640777
FBgn0013726	pnut	12.0709	0.490793	0.187746	0.00894555	0.20054
FBgn0013732	sced	9.15684	0.00844679	0.104977	0.935869	1
FBgn0013733	shot	13.1372	-0.00154484	0.229306	0.994625	1
FBgn0013746	alien	10.5383	-0.540397	0.849585	0.524729	0.798123
FBgn0013749	Arf102F	10.3919	-0.984841	1.15523	0.393934	0.724266
FBgn0013750	Arf51F	10.4054	-0.42582	0.321183	0.184911	0.555014
FBgn0013751	Awh	5.31631	0.29181	0.626318	0.641277	0.862419
FBgn0013753	Bgb	10.6774	0.435723	0.230593	0.0588151	0.345181
FBgn0013756	Mtor	12.3323	-0.066343	0.173664	0.702447	0.895438
FBgn0013759	CASK	10.6757	0.323713	0.183066	0.0770124	0.392196
FBgn0013762	Cdk5	8.69083	-0.103317	0.169771	0.54281	0.807452
FBgn0013763	Idgf6	10.0087	-0.420368	0.563985	0.456059	0.760383
FBgn0013764	Chi	10.9256	0.726166	0.276826	0.00871106	0.20054
FBgn0013765	cnn	10.0434	-0.242898	0.156384	0.120373	0.466647
FBgn0013767	Crz	-0.765384	-0.374348	2.60134	0.885575	0.984521
FBgn0013770	Cp1	12.6015	0.151466	0.134395	0.259734	0.630143
FBgn0013771	Cyp6a9	3.42069	-2.42871	1.66664	0.145048	0.505743
FBgn0013772	Cyp6a8	5.10423	0.00398367	2.10538	0.99849	1
FBgn0013773	Cyp6a22	2.8326	-0.578658	1.62777	0.722222	0.908349
FBgn0013799	Deaf1	10.4205	0.239553	0.189933	0.207218	0.57953
FBgn0013810	Dhc36C	3.52385	0.104225	0.594816	0.860904	0.973804
FBgn0013811	Dhc62B	5.38816	0.601986	0.325051	0.0640297	0.361947
FBgn0013812	Dhc93AB	6.98144	-0.146719	0.359703	0.683354	0.886051
FBgn0013813	Dhc98D	3.07476	-0.811662	0.811136	0.316997	0.668441
FBgn0013949	Elal	4.97828	0.818813	1.36645	0.549023	0.813243
FBgn0013953	Esp	3.26439	0.965375	1.46412	0.509667	0.791514
FBgn0013954	Fkbp12	13.4392	0.801428	0.296386	0.00685094	0.20054
FBgn0013972	Gycalpha99B	3.45335	-0.243916	0.877744	0.781097	0.933904
FBgn0013973	Gycbeta100B	1.35161	-0.411281	0.844093	0.626084	0.853134
FBgn0013981	His4r	13.9005	-0.0298703	0.116877	0.798283	0.943825
FBgn0013983	imd	9.03867	0.615398	0.26618	0.0207798	0.237805
FBgn0013987	MAPk-Ak2	11.5764	-0.121608	0.181877	0.503735	0.788163
FBgn0013995	Calx	2.5558	0.791129	0.708377	0.264072	0.633888
FBgn0013997	Nrx-IV	12.6753	-0.607583	0.324234	0.0609437	0.351564
FBgn0014000	Hf	5.03626	0.0164194	1.05846	0.987623	1
FBgn0014006	Ask1	10.864	-0.173758	0.164722	0.291491	0.649683
FBgn0014007	Ptp69D	10.0604	-0.878613	0.502921	0.080634	0.40046
FBgn0014009	Rab2	10.7184	-0.128549	0.162675	0.4294	0.744756
FBgn0014010	Rab5	11.9368	0.338735	0.227692	0.136833	0.493744
FBgn0014011	Rac2	10.7185	-0.328036	0.119837	0.00619353	0.20054
FBgn0014018	Rel	10.1082	-0.557431	0.396756	0.160029	0.526599
FBgn0014019	Rh5	4.71682	-0.040743	0.440789	0.926355	0.998734
FBgn0014020	Rho1	12.8344	-0.447174	0.301243	0.137694	0.494434
FBgn0014022	Rlb1	8.17437	-0.385309	0.190087	0.0426604	0.300966
FBgn0014023	mRpL47	9.15096	-0.249655	0.28418	0.379667	0.713121
FBgn0014024	Rnp4F	10.7435	0.257008	0.121514	0.034425	0.279412
FBgn0014026	RpL7A	15.7353	0.434719	0.214579	0.0427733	0.301042
FBgn0014028	SdhB	10.8597	1.00291	0.334229	0.00269389	0.199862
FBgn0014029	2024-09-02	11.2584	0.154445	0.0996309	0.121101	0.468026
FBgn0014031	Spat	5.33694	0.241625	1.21923	0.842905	0.966675
FBgn0014032	Sptr	8.96012	-0.126883	0.169627	0.454453	0.759383
FBgn0014033	Sr-CI	7.57412	-0.442546	0.412491	0.283333	0.644844
FBgn0014037	Su(Tpl)	11.575	0.309164	0.197278	0.117079	0.462217
FBgn0014073	Tie	9.32574	-0.389071	0.232829	0.0947101	0.425685
FBgn0014075	Uggt	11.7653	-0.376553	0.373254	0.313051	0.665603
FBgn0014076	Vm32E	0.522857	0	2.19931	1	1
FBgn0014092	CG4278	9.14156	-0.113832	0.280574	0.684955	0.887346
FBgn0014127	barr	10.9751	-0.00120882	0.12772	0.992448	1
FBgn0014133	bif	12.9161	0.471309	0.239084	0.0486885	0.317132
FBgn0014135	bnl	6.22447	-0.35584	0.251797	0.157598	0.524378
FBgn0014141	cher	12.1647	-0.330339	0.208219	0.112626	0.456904
FBgn0014163	fax	14.6815	0.573209	0.237813	0.0159378	0.217357
FBgn0014179	gcm	3.76148	-0.719585	0.934871	0.441468	0.750707
FBgn0014184	Oda	13.5175	0.577879	0.233638	0.0133838	0.210602
FBgn0014189	Hel25E	12.726	0.0251824	0.0879524	0.774634	0.930608
FBgn0014269	prod	10.0994	0.362224	0.167296	0.0303748	0.269338
FBgn0014340	mof	8.60016	0.422499	0.181889	0.0201878	0.237011
FBgn0014342	mia	7.7139	-0.319647	0.200834	0.111475	0.455019
FBgn0014343	mirr	11.2962	0.803876	0.271809	0.00310139	0.199862
FBgn0014366	noi	10.3396	-0.00377607	0.187111	0.983899	1
FBgn0014368	nol	-0.809741	0	3.29836	1	1
FBgn0014380	RhoL	9.26593	0.00632179	0.287003	0.982426	1
FBgn0014388	sty	10.9912	0.824885	0.297036	0.00548542	0.20054
FBgn0014391	sun	11.0715	0.104164	0.185093	0.573595	0.825909
FBgn0014395	tilB	3.62095	0.0310382	0.525247	0.952878	1
FBgn0014396	tim	3.24582	0.126254	0.507306	0.80346	0.946813
FBgn0014411	Vps26	10.8387	0.181277	0.128588	0.158613	0.525154
FBgn0014417	CG13397	6.20793	-0.167148	0.377161	0.65764	0.871421
FBgn0014427	CG11899	11.702	-0.134764	0.273538	0.622247	0.851149
FBgn0014454	Acp1	2.91867	-0.05479	0.808513	0.945972	1
FBgn0014455	Ahcy	11.5042	0.422692	0.199484	0.0340966	0.279047
FBgn0014464	Cp7Fa	-0.968381	0	3.98331	1	1
FBgn0014466	Cp7Fc	-0.462913	-1.88687	4.25448	0.657402	0.871421
FBgn0014469	Cyp4e2	9.63512	-0.953613	0.568031	0.0931902	0.42238
FBgn0014850	Eig71Ej	0.315659	-1.56635	2.7818	0.573388	0.825909
FBgn0014857	His3.3A	11.7945	1.07975	0.383949	0.00492007	0.20054
FBgn0014859	Hr38	2.84232	-0.87368	0.560962	0.119359	0.465008
FBgn0014861	Mcm2	10.3315	0.182718	0.206396	0.376006	0.710601
FBgn0014863	Mlp84B	3.62541	0.014103	0.705675	0.984055	1
FBgn0014868	Ost48	12.6566	0.572659	0.194686	0.00326676	0.199862
FBgn0014869	Pglym78	10.1794	0.552337	0.228433	0.0156087	0.21652
FBgn0014870	Psi	12.1094	0.594009	0.267539	0.0264006	0.257259
FBgn0014877	Roe1	8.83684	-0.204786	0.225913	0.364679	0.702681
FBgn0014879	Set	11.9894	0.42077	0.239163	0.0785191	0.396259
FBgn0014903	CG14630	-0.952634	0	2.18269	1	1
FBgn0014906	Hydr2	9.43128	-0.230605	0.281961	0.413436	0.736937
FBgn0014930	CG2846	8.70569	0.0804389	0.12481	0.519256	0.795645
FBgn0014931	CG2678	3.35724	0.654565	0.652946	0.316112	0.668257
FBgn0014949	btn	1.45917	0.0755272	1.17843	0.948897	1
FBgn0015000	betaggt-I	9.06203	0.111183	0.101381	0.272778	0.639349
FBgn0015001	iotaTry	-1.09433	2.46981	3.77815	0.513299	0.792948
FBgn0015008	Actn3	-1.47355	0	3.24835	1	1
FBgn0015010	Ag5r	3.16954	-0.353808	0.646602	0.584255	0.833341
FBgn0015011	AhcyL2	5.3806	0.41452	0.324924	0.202045	0.574357
FBgn0015019	CCT3	12.6938	0.384178	0.189263	0.0423699	0.300607
FBgn0015024	CkIalpha	12.5872	0.0827326	0.135307	0.540906	0.805735
FBgn0015025	CkIIalpha-i1	6.69617	-0.766926	0.48111	0.110919	0.454439
FBgn0015031	cype	11.0431	1.26601	0.433175	NA	NA
FBgn0015032	Cyp4c3	1.38379	-1.63317	4.90702	NA	NA
FBgn0015033	Cyp4d8	3.69963	-0.647603	1.04211	0.534312	0.801977
FBgn0015034	Cyp4e1	3.37652	-1.06438	0.994217	0.28436	0.645705
FBgn0015035	Cyp4e3	1.23265	-0.815159	1.26633	0.519757	0.795663
FBgn0015036	Cyp4ae1	3.70252	-0.164523	0.452914	0.716415	0.904607
FBgn0015037	Cyp4p1	3.16983	0	2.29606	1	1
FBgn0015038	Cyp9b1	0.530327	3.11524	3.0351	0.304702	0.661056
FBgn0015039	Cyp9b2	5.87275	-0.444785	1.42827	0.755484	0.923854
FBgn0015040	Cyp9c1	9.17364	-0.375943	0.348781	0.281088	0.64362
FBgn0015075	Ddx1	10.3248	0.441139	0.129832	0.000679382	0.131644
FBgn0015218	eIF4E1	12.7894	0.190852	0.168458	0.257241	0.627599
FBgn0015221	Fer2LCH	12.6504	0.243539	0.171367	0.155273	0.520512
FBgn0015222	Fer1HCH	12.595	-0.106257	0.0864364	0.218955	0.590418
FBgn0015229	glec	11.7808	0.400222	0.28094	0.154279	0.518798
FBgn0015239	Hr78	12.1798	0.45154	0.213755	0.0346502	0.279567
FBgn0015240	Hr96	8.56569	0.480363	0.21383	0.0246737	0.251851
FBgn0015245	Hsp60A	12.8461	0.641136	0.256015	0.0122698	0.209107
FBgn0015247	Diap2	10.0389	0.254006	0.157366	0.106503	0.446881
FBgn0015268	Nap1	12.9085	0.033968	0.0930562	0.715092	0.903515
FBgn0015269	Nf1	9.92428	-0.403208	0.395072	0.307446	0.662933
FBgn0015270	Orc2	7.85034	-0.596806	0.32307	0.0647044	0.363371
FBgn0015271	Orc5	7.93282	-0.611321	0.40834	0.13437	0.489749
FBgn0015277	Pi3K59F	9.06094	0.267589	0.174948	0.126132	0.476777
FBgn0015278	Pi3K68D	10.6686	-0.259676	0.195209	0.183438	0.552557
FBgn0015279	Pi3K92E	10.6769	-0.30883	0.237502	0.193489	0.563867
FBgn0015282	Rpt2	12.086	0.184771	0.12171	0.128984	0.480945
FBgn0015283	Rpn10	11.7007	0.241454	0.165857	0.145448	0.50636
FBgn0015286	Rala	10.0407	-0.147866	0.218967	0.499493	0.785428
FBgn0015288	RpL22	14.9457	0.903485	0.341352	0.00812608	0.20054
FBgn0015295	Shark	9.98874	0.0533369	0.143233	0.709612	0.900584
FBgn0015296	Shc	9.89966	0.00741948	0.190662	0.968959	1
FBgn0015298	Srp19	9.43149	-0.398363	0.242681	0.100691	0.437534
FBgn0015299	Ssb-c31a	9.03006	-0.433409	0.595269	0.466558	0.767338
FBgn0015316	Try29F	5.30597	-0.350146	0.339263	0.302035	0.65856
FBgn0015320	Ubc2	11.4188	1.49558	0.431444	NA	NA
FBgn0015321	Ubc4	10.6371	0.167888	0.144262	0.244518	0.617038
FBgn0015331	abs	9.84231	-0.245914	0.310627	0.428554	0.744708
FBgn0015336	CG15865	0.0582094	0.588036	1.8341	0.748505	0.919585
FBgn0015338	CG5861	9.85907	-0.296155	0.328264	0.366958	0.703718
FBgn0015351	CG14906	6.77077	-0.348344	0.258008	0.176974	0.546254
FBgn0015359	CG2034	9.41648	0.3351	0.180892	0.0639562	0.361705
FBgn0015360	oxt	8.5502	0.000986333	0.148029	0.994684	1
FBgn0015371	chn	10.1338	0.320806	0.251274	0.201703	0.573803
FBgn0015372	RabX1	8.71194	0.129623	0.138839	0.3505	0.692909
FBgn0015376	cutlet	7.91391	-0.31723	0.388909	0.414676	0.737491
FBgn0015379	dod	10.6879	1.09835	0.334458	0.00102351	0.153138
FBgn0015380	drl	12.3727	-0.165884	0.167717	0.322628	0.672263
FBgn0015391	glu	10.3853	0.0473588	0.245395	0.846967	0.968223
FBgn0015396	jumu	11.087	-0.0323977	0.220705	0.883297	0.983566
FBgn0015399	kek1	11.1072	0.355655	0.228919	0.120274	0.466417
FBgn0015400	kek2	5.4796	-0.218217	0.411102	0.59555	0.838402
FBgn0015402	ksr	10.2416	0.280808	0.190463	0.140389	0.498395
FBgn0015477	Rme-8	11.0357	-0.466293	0.301379	0.121816	0.468779
FBgn0015509	Cul1	12.3155	-0.136377	0.151502	0.368032	0.7047
FBgn0015513	mbc	10.6248	-0.341028	0.335489	0.309386	0.664422
FBgn0015519	nAChRalpha3	-0.15734	-0.986078	1.69379	0.56045	0.819194
FBgn0015520	nonA-l	9.39786	-0.163601	0.258177	0.526291	0.799584
FBgn0015521	RpS21	14.3556	1.68898	0.493148	NA	NA
FBgn0015522	olf186-M	5.56148	-0.261062	0.378245	0.490073	0.781104
FBgn0015527	peng	10.7461	0.445875	0.197362	0.023873	0.249485
FBgn0015543	snoRNA:Me28S-A1322	6.23414	0.134031	1.17239	0.908982	0.992933
FBgn0015544	spag	8.61461	-0.559608	0.517331	0.279376	0.642916
FBgn0015546	spel1	9.95563	-0.284841	0.279102	0.307462	0.662933
FBgn0015550	tap	-1.03252	0.125957	3.05039	0.967063	1
FBgn0015553	tos	6.99431	-0.126278	0.329261	0.701335	0.894952
FBgn0015558	tty	6.95135	0.21357	0.259449	0.410411	0.73424
FBgn0015561	unpg	3.21886	-1.71038	0.86412	0.0477786	0.314405
FBgn0015568	alpha-Est1	6.27369	-0.927697	0.83135	0.264468	0.634081
FBgn0015569	alpha-Est10	6.53086	-0.939305	0.635555	0.139427	0.497892
FBgn0015570	alpha-Est2	5.48667	-1.9383	2.45288	NA	NA
FBgn0015571	alpha-Est3	7.74749	0.0863201	0.160176	0.589951	0.835721
FBgn0015572	alpha-Est4	5.17664	-1.03304	0.757084	0.17241	0.542025
FBgn0015575	alpha-Est7	5.54736	-0.308633	1.15382	0.789094	0.938959
FBgn0015576	alpha-Est8	3.3573	0.68967	1.00976	0.494602	0.783173
FBgn0015577	alpha-Est9	3.72637	0.131247	0.543904	0.809318	0.949208
FBgn0015582	dare	8.70901	0.084921	0.144872	0.557756	0.818248
FBgn0015586	Acp76A	-1.32761	-0.446758	3.2037	0.889094	0.986246
FBgn0015589	Apc	10.5015	0.00847499	0.182415	0.962944	1
FBgn0015591	AstA	1.46122	-1.52927	1.70053	0.368499	0.704799
FBgn0015600	toc	10.605	0.0149593	0.110078	0.891902	0.986524
FBgn0015602	BEAF-32	10.3246	0.00223206	0.107124	0.983376	1
FBgn0015609	CadN	11.8536	-0.388206	0.352811	0.271192	0.63829
FBgn0015614	CanB2	10.3832	0.0440571	0.296305	0.8818	0.983104
FBgn0015615	SMC3	10.5912	-0.336543	0.228121	0.140136	0.498263
FBgn0015618	Cdk8	8.54114	-0.231288	0.340049	0.496403	0.784209
FBgn0015621	Clp	8.53231	0.461714	0.211938	0.0293662	0.265373
FBgn0015622	Cnx99A	12.5813	0.305371	0.151022	0.0431737	0.302069
FBgn0015623	Cpr	11.7457	0.0777206	0.116926	0.506243	0.790148
FBgn0015625	CycB3	9.93393	0.449288	0.172191	0.00907407	0.20054
FBgn0015663	Ugt36A1	6.41076	-0.853674	0.565499	0.131147	0.483066
FBgn0015664	Dref	10.7225	-0.44746	0.272408	0.100464	0.437534
FBgn0015714	Cyp6a17	7.10298	-0.480673	0.544276	0.377159	0.71117
FBgn0015721	ktub	4.07682	0.0229172	0.337555	0.945872	1
FBgn0015737	Hmu	12.9066	0.358594	0.180578	0.0470544	0.312362
FBgn0015754	Lis-1	11.5894	-0.0650431	0.10299	0.527682	0.800481
FBgn0015756	RpL9	14.6885	-0.0926735	0.117964	0.432095	0.747162
FBgn0015765	p38a	8.34402	-0.410239	0.410775	0.317942	0.668815
FBgn0015766	Msr-110	13.2557	0.507181	0.268641	0.0590322	0.34594
FBgn0015772	Nak	10.1839	-0.2154	0.163366	0.187332	0.556143
FBgn0015773	NetA	12.0794	0.424834	0.536265	0.428239	0.744479
FBgn0015774	NetB	10.454	0.256877	0.27043	0.342171	0.6865
FBgn0015776	nrv1	10.4734	-0.296175	0.238098	0.213528	0.585864
FBgn0015777	nrv2	11.5438	-0.32742	0.259212	0.206541	0.57906
FBgn0015778	rin	13.6899	0.520068	0.241587	0.0313409	0.270988
FBgn0015781	P5cr	9.08054	0.215253	0.151312	0.15486	0.520013
FBgn0015789	Rab10	10.5826	0.0370557	0.198856	0.852175	0.969835
FBgn0015790	Rab11	12.6039	0.153755	0.16569	0.353424	0.694599
FBgn0015791	Rab14	9.62527	-0.410053	0.335332	0.221395	0.592135
FBgn0015793	Rab19	8.3906	-0.695146	0.295056	0.0184739	0.230037
FBgn0015794	Rab18	9.18733	-0.229726	0.206125	0.265065	0.634081
FBgn0015795	Rab7	11.0729	-0.594647	0.271161	0.02831	0.262648
FBgn0015797	Rab6	11.3357	-0.201868	0.230886	0.381947	0.715016
FBgn0015799	Rbf	10.8812	0.205507	0.146649	0.16111	0.527453
FBgn0015801	Reg-5	8.9328	0.123764	0.190983	0.51696	0.794082
FBgn0015803	RtGEF	10.1234	0.385192	0.206402	0.0620098	0.355114
FBgn0015805	HDAC1	12.1312	-0.234877	0.229854	0.306852	0.662933
FBgn0015808	ScpX	10.7827	-0.204997	0.227869	0.368319	0.704792
FBgn0015818	Spx	9.93841	0.546358	0.216301	0.0115398	0.208133
FBgn0015828	TfIIEalpha	9.23591	0.308659	0.144946	0.0332147	0.276104
FBgn0015829	TfIIEbeta	9.42786	0.483189	0.248553	0.0518946	0.325926
FBgn0015831	Rtnl2	1.01451	-0.980895	1.7735	0.580206	0.831277
FBgn0015834	eIF3i	12.6732	-0.275375	0.319093	0.388142	0.720101
FBgn0015838	Vang	11.8389	0.108581	0.103278	0.2931	0.650943
FBgn0015872	Drip	8.77659	-0.284758	0.362482	0.432115	0.747162
FBgn0015903	apt	7.94028	0.0185412	0.293575	0.949642	1
FBgn0015904	ara	11.3597	0.343709	0.148935	0.0210118	0.238614
FBgn0015905	ast	8.91399	-0.212943	0.171729	0.214978	0.587079
FBgn0015919	caup	11.2857	0.377497	0.219857	0.0859762	0.411032
FBgn0015924	crq	9.5492	-0.390071	0.46032	0.396778	0.725792
FBgn0015925	csul	8.91927	-0.304584	0.370233	0.410689	0.73424
FBgn0015926	dah	8.61879	0.901326	0.321043	0.00499285	0.20054
FBgn0015929	dpa	10.5909	0.2223	0.209245	0.288058	0.64733
FBgn0015946	grim	0.165358	-0.0950151	1.31072	0.942211	1
FBgn0015949	hrg	11.9426	-0.2391	0.194579	0.219145	0.590718
FBgn0016013	Faa	7.32122	-0.753051	0.447079	0.0921082	0.419728
FBgn0016032	lbm	4.6062	-0.117	0.414684	0.777834	0.932454
FBgn0016034	mael	3.62162	0.388238	0.630442	0.538015	0.804327
FBgn0016036	mei-P22	1.7044	-1.02582	0.96536	0.287952	0.647317
FBgn0016038	Vsp37A	10.1076	0.550124	0.259121	0.0337507	0.27757
FBgn0016041	Tom40	10.3954	0.528496	0.249829	0.0343936	0.279412
FBgn0016047	nompA	10.7065	0.065563	0.140541	0.640854	0.862128
FBgn0016053	pgc	3.16548	0.0904643	0.571144	0.874148	0.979724
FBgn0016054	phr6-4	7.79001	0.0465358	0.343881	0.892355	0.986524
FBgn0016059	Sema1b	12.8515	-0.155979	0.132889	0.240491	0.612599
FBgn0016061	side	5.89224	-0.246178	0.708181	0.728125	0.910438
FBgn0016070	smg	9.56959	-0.0427144	0.10305	0.678507	0.882673
FBgn0016075	vkg	10.2066	0.0946651	0.321358	0.768316	0.929339
FBgn0016076	vri	9.6148	0.607639	0.239497	0.0111762	0.207579
FBgn0016078	wun	10.2702	-0.557944	0.261935	0.0331647	0.276104
FBgn0016081	fry	11.5927	-0.078784	0.197668	0.690212	0.889066
FBgn0016119	ATPsynCF6	11.2768	-0.00200959	0.183708	0.991272	1
FBgn0016120	ATPsynD	11.9954	0.932193	0.331412	0.00491133	0.20054
FBgn0016122	Acer	6.75537	-0.679375	0.713025	0.340688	0.685899
FBgn0016123	Alp4	0.578612	-0.188211	1.56687	0.904389	0.991728
FBgn0016126	CaMKI	10.9495	-0.654909	1.17146	0.576125	0.828241
FBgn0016131	Cdk4	10.5177	-0.208468	0.133132	0.117377	0.462794
FBgn0016641	PTP-ER	9.87628	-0.241266	0.222987	0.279264	0.642916
FBgn0016650	Lgr1	1.16248	-1.30245	0.908604	0.151725	0.515804
FBgn0016660	H15	4.96375	0.954402	1.13231	0.399294	0.72766
FBgn0016672	Ipp	9.17083	0.194913	0.151594	0.198528	0.570347
FBgn0016675	Lectin-galC1	-0.816371	0.954694	2.99233	0.749691	0.920277
FBgn0016684	NaPi-T	5.35654	-0.674978	0.350316	0.0540082	0.332635
FBgn0016685	Nlp	12.9692	-0.105551	0.262349	0.687441	0.887795
FBgn0016687	Nurf-38	11.9859	-0.192156	0.202819	0.343422	0.687225
FBgn0016691	ATPsynO	12.1244	0.712435	0.285721	0.0126503	0.209715
FBgn0016693	Past1	11.1155	0.214309	0.227288	0.345734	0.688339
FBgn0016694	Pdp1	6.94607	-0.145452	0.380936	0.702589	0.895438
FBgn0016696	Pitslre	12.0944	0.0590374	0.0915017	0.518794	0.79504
FBgn0016697	Prosalpha5	11.2241	0.468164	0.193184	0.0153757	0.215567
FBgn0016698	Ptpa	8.91513	-0.29077	0.291717	0.318884	0.669962
FBgn0016701	Rab4	10.2185	-0.436355	0.319702	0.172291	0.542025
FBgn0016715	Reg-2	6.66885	-0.185442	0.600628	0.757515	0.924382
FBgn0016726	RpL29	14.2845	0.194082	0.164329	0.23758	0.610193
FBgn0016754	sba	10.6889	0.22419	0.20582	0.276041	0.641618
FBgn0016756	Usp47	12.0184	-0.106513	0.132839	0.422656	0.742325
FBgn0016762	angel	7.86311	-0.390638	0.538733	0.468387	0.768194
FBgn0016794	dos	10.4216	0.340896	0.193834	0.0786277	0.396259
FBgn0016797	fz2	13.1344	0.477459	0.235205	0.0423597	0.300607
FBgn0016917	Stat92E	11.4524	-0.308699	0.200541	0.123723	0.472355
FBgn0016919	nompB	4.4182	0.461176	0.661604	0.485767	0.77844
FBgn0016920	nompC	2.62955	-0.42118	0.695314	0.544687	0.809226
FBgn0016926	Pino	10.5206	0.272262	0.215317	0.206062	0.578266
FBgn0016930	Dyrk2	11.6119	0.0112445	0.342779	0.973831	1
FBgn0016970	l(2)k10201	7.09899	-0.475239	0.270274	0.078686	0.396259
FBgn0016977	spen	12.73	-0.223289	0.276681	0.419651	0.740328
FBgn0016978	snRNP-U1-70K	11.3744	0.566683	0.254155	0.0257693	0.254915
FBgn0016983	smid	11.5761	-0.359328	0.317514	0.257765	0.628111
FBgn0016984	sktl	10.8827	0.279402	0.141576	0.0484365	0.316428
FBgn0017414	cag	8.5139	-0.664469	0.428903	0.121327	0.468471
FBgn0017418	ari-1	9.89537	0.0320517	0.140448	0.819483	0.954596
FBgn0017424	asRNA:CR11538	8.31533	-0.664033	1.4076	0.637107	0.860952
FBgn0017429	CG5989	8.7334	0.228802	0.146213	0.117618	0.46326
FBgn0017430	Nelf-E	8.92347	0.430877	0.230615	0.061709	0.354078
FBgn0017457	U2af38	10.567	0.191374	0.148457	0.197368	0.568997
FBgn0017482	T3dh	7.38024	-0.0436991	0.361437	0.903767	0.991495
FBgn0017545	RpS3A	14.8828	-1.29055	0.72066	0.0733261	0.386408
FBgn0017550	Rga	11.9999	0.497841	0.217506	0.0220871	0.243218
FBgn0017551	Rca1	9.67572	0.369568	0.147936	0.0124842	0.209107
FBgn0017558	Pdk	9.38088	-0.342291	0.25375	0.177359	0.546925
FBgn0017561	Ork1	0.870732	-2.36754	2.21939	0.286083	0.646829
FBgn0017566	ND-75	11.5409	0.969216	0.333111	0.00361901	0.20054
FBgn0017567	ND-23	9.83532	0.212775	0.138764	0.125186	0.474415
FBgn0017572	Mo25	11.2773	0.0561187	0.0897621	0.531843	0.801332
FBgn0017577	Mcm5	10.0955	-0.369877	0.287098	0.197632	0.569342
FBgn0017578	Max	9.80717	0.15078	0.149359	0.31273	0.665428
FBgn0017579	RpL14	15.1806	0.682853	0.284366	0.0163362	0.219137
FBgn0017581	Lk6	13.3902	-0.00230734	0.164525	0.988811	1
FBgn0017590	klg	4.98247	0.486907	0.546401	0.372867	0.70834
FBgn0019624	COX5A	11.4323	1.01713	0.366707	0.0055425	0.20054
FBgn0019637	Atu	10.7538	0.519387	0.180218	0.0039516	0.20054
FBgn0019643	AANAT1	5.12009	-0.301689	0.278783	0.279181	0.642916
FBgn0019644	ATPsynB	12.0105	0.975618	0.33708	0.00379981	0.20054
FBgn0019650	toy	2.40784	-0.487406	1.24695	0.695886	0.892231
FBgn0019660	lncRNA:roX2	4.74966	0	4.07264	1	1
FBgn0019661	lncRNA:roX1	9.25428	1.52748	1.30168	0.240608	0.612664
FBgn0019662	qm	9.38852	0.158684	0.146825	0.279799	0.642928
FBgn0019686	lok	9.84448	-0.392694	0.235394	0.0952685	0.426512
FBgn0019809	gcm2	3.18268	0.0114037	0.898083	0.989869	1
FBgn0019830	colt	11.258	0.526599	0.200229	0.0085389	0.20054
FBgn0019890	Smg5	12.0737	-0.161189	0.121881	0.186	0.555368
FBgn0019925	Surf4	11.6461	-0.0569325	0.0783376	0.467374	0.76772
FBgn0019932	SamDC	7.92992	-1.15912	1.06828	0.277908	0.642267
FBgn0019936	RpS20	14.6424	0.00172969	0.139185	0.990085	1
FBgn0019938	RpI1	10.2162	-0.467564	0.363341	0.198148	0.570229
FBgn0019940	Rh6	1.76998	0.786273	1.25287	0.53028	0.801216
FBgn0019949	Cdk9	9.23829	-0.232669	0.210655	0.269374	0.637234
FBgn0019952	Orct	8.25219	-0.155216	0.165033	0.346953	0.68982
FBgn0019957	ND-42	10.9911	0.852049	0.29931	0.00441734	0.20054
FBgn0019960	Mitofilin	11.226	0.667535	0.222363	0.00268208	0.199862
FBgn0019968	Khc-73	11.4436	-0.166663	0.223947	0.456751	0.760724
FBgn0019972	Drice	10.6892	0.338507	0.167009	0.0426751	0.300966
FBgn0019982	Gs1l	8.39914	0.57423	0.271832	0.0346482	0.279567
FBgn0019985	mGluR	6.06012	-0.795308	0.571643	0.164145	0.530857
FBgn0019990	Gcn2	10.4576	-0.325195	0.234988	0.166396	0.533876
FBgn0020018	Ppox	8.41533	0.0296732	0.176569	0.866541	0.976505
FBgn0020224	Cbl	10.3606	-0.284292	0.169853	0.0941798	0.424516
FBgn0020235	ATPsyngamma	12.2652	0.517705	0.218728	0.0179384	0.226602
FBgn0020236	ATPCL	12.1515	-0.108614	0.108514	0.316863	0.668331
FBgn0020238	14-3-3epsilon	14.8579	-0.0762247	0.0883928	0.3885	0.720101
FBgn0020248	stet	3.89682	-0.463461	0.623045	0.456958	0.760854
FBgn0020249	stck	10.3272	-0.411609	0.322829	0.202307	0.574824
FBgn0020251	sfl	9.56224	-0.447109	0.327557	0.172259	0.542025
FBgn0020255	Ran	13.151	0.366119	0.212231	0.0845098	0.407491
FBgn0020257	Ppa	12.0674	0.544851	0.212064	0.0101912	0.204255
FBgn0020258	ppk	4.42851	0.0685214	0.746717	0.926886	0.998795
FBgn0020261	pcm	11.0604	0.449583	0.217409	0.0386486	0.288625
FBgn0020269	mspo	6.92751	0.541656	0.397092	0.172549	0.542025
FBgn0020270	mre11	9.88882	-0.104857	0.271894	0.699752	0.894266
FBgn0020272	mst	8.16509	0.469758	0.192229	0.0145356	0.21393
FBgn0020277	lush	1.59704	2.21709	1.61115	0.168793	0.537595
FBgn0020278	loco	10.7381	0.325131	0.173274	0.0605999	0.350646
FBgn0020279	lig	14.1557	0.569276	0.264963	0.0316732	0.272027
FBgn0020294	ko	11.4489	0.311626	0.195254	0.110488	0.45389
FBgn0020299	stumps	9.0467	-0.385376	0.19254	0.0453351	0.30876
FBgn0020300	geko	8.80151	0.946972	0.411316	0.0213186	0.240215
FBgn0020304	drongo	11.5778	0.406306	0.241061	0.0918939	0.419377
FBgn0020305	dbe	9.64867	0.0224174	0.11818	0.849553	0.969432
FBgn0020306	dom	12.854	0.0699391	0.163321	0.668483	0.876967
FBgn0020307	dve	9.56422	0.639466	0.253586	0.011679	0.208307
FBgn0020309	crol	13.5313	0.492284	0.203988	0.0158085	0.21652
FBgn0020312	Tmtc3	10.6298	-0.187251	0.145621	0.198486	0.570347
FBgn0020369	Rpt6	11.8961	0.0109341	0.110137	0.920918	0.996635
FBgn0020370	TppII	12.1506	-0.150466	0.153234	0.326131	0.675055
FBgn0020372	TM4SF	5.47278	0.526823	0.565632	0.351653	0.694091
FBgn0020376	Sr-CIII	1.48576	0.995921	1.84117	0.588563	0.835238
FBgn0020378	Sp1	7.3009	0.364756	0.967524	0.706174	0.898152
FBgn0020379	Rfx	8.53052	0.38399	0.225206	0.0881823	0.41411
FBgn0020381	Dredd	10.2144	-0.283042	0.367321	0.44097	0.750707
FBgn0020385	pug	11.0183	0.139299	0.195016	0.475046	0.772571
FBgn0020386	Pdk1	11.1775	-0.00163598	0.198558	0.993426	1
FBgn0020388	Gcn5	10.4456	0.375104	0.188051	0.0460765	0.310327
FBgn0020389	Papss	11.5453	0.127867	0.23995	0.59411	0.838241
FBgn0020391	Nrk	6.99074	0.41496	0.190135	0.0290759	0.264356
FBgn0020392	Nmt	10.7482	-0.372926	0.370405	0.314028	0.666273
FBgn0020399	Mst89B	2.61707	-0.698993	0.834953	0.402501	0.729117
FBgn0020407	asun	8.19139	-0.018827	0.146539	0.897771	0.988418
FBgn0020412	JIL-1	10.4964	0.196745	0.168648	0.243373	0.616252
FBgn0020414	Idgf3	7.87409	-0.515591	0.756079	0.495285	0.783357
FBgn0020415	Idgf2	6.47276	-0.456549	0.718345	0.525065	0.798337
FBgn0020416	Idgf1	6.00701	-0.136274	1.09271	0.900752	0.990316
FBgn0020429	GluRIIB	0.548764	-0.147829	1.62573	0.927548	0.999017
FBgn0020440	Fak	9.85314	-0.665211	0.480086	0.165866	0.533391
FBgn0020443	eRF3	12.419	0.3286	0.169556	0.0526228	0.32858
FBgn0020445	E23	7.96219	0.292771	0.505982	0.562847	0.819828
FBgn0020493	Dad	11.0311	0.399564	0.159534	0.0122601	0.209107
FBgn0020496	CtBP	13.5618	0.65958	0.269473	0.0143785	0.21393
FBgn0020497	emb	11.8548	-0.45691	0.370392	0.217358	0.589016
FBgn0020503	CLIP-190	9.80697	-0.570672	0.33244	0.0860487	0.411032
FBgn0020508	Ag5r2	0.505903	0.577678	1.70241	0.734362	0.913399
FBgn0020510	Abi	10.645	0.465538	0.237242	0.0497279	0.319551
FBgn0020513	Paics	11.1927	-0.147507	0.121985	0.226575	0.597927
FBgn0020518	snoRNA:Me28S-G764	-0.876259	0	2.79993	1	1
FBgn0020521	pio	14.4379	0.205702	0.31852	0.518406	0.794818
FBgn0020545	kraken	9.11365	0.59281	0.236183	0.0120745	0.209107
FBgn0020616	SA	10.5	-0.298866	0.337602	0.376016	0.710601
FBgn0020617	Rx	4.40631	1.52196	0.633149	0.0162262	0.218943
FBgn0020618	Rack1	15.5262	0.398128	0.202921	0.0497643	0.319551
FBgn0020620	RN-tre	10.3379	0.13861	0.125322	0.268712	0.637071
FBgn0020621	Pkn	11.9531	0.198565	0.196066	0.311181	0.665061
FBgn0020622	Pi3K21B	10.3737	0.516836	0.271288	0.0567645	0.34021
FBgn0020626	Osbp	10.5716	0.357222	0.192976	0.0641512	0.362287
FBgn0020633	Mcm7	10.6016	-0.265132	0.236622	0.262506	0.632635
FBgn0020637	Lcp65Ag2	3.30582	-1.96701	1.6735	0.239839	0.611825
FBgn0020638	Lcp65Ag1	-0.124769	-0.446736	3.24376	0.89046	0.986433
FBgn0020639	Lcp65Af	0.552844	0	2.29022	1	1
FBgn0020641	Lcp65Ad	1.60538	-0.553935	1.05762	0.600447	0.84059
FBgn0020642	Lcp65Ac	0.937418	0	5.03086	NA	NA
FBgn0020647	KrT95D	11.2324	0.45043	0.235069	0.0553447	0.33633
FBgn0020653	Trxr-1	13.1518	0.895729	0.302942	0.0031088	0.199862
FBgn0020655	ArfGAP1	10.7567	0.168638	0.151309	0.265052	0.634081
FBgn0020660	eIF4B	9.64916	-1.68222	0.97622	NA	NA
FBgn0020762	Atet	10.1387	-0.396947	0.433224	0.359529	0.699068
FBgn0020764	Alas	9.95316	0.286324	0.15164	0.0590013	0.34593
FBgn0020765	Acp65Aa	5.04101	-0.804097	0.75439	0.286473	0.646829
FBgn0020767	Spred	10.9207	0.478932	0.239054	0.0451291	0.30876
FBgn0020880	CG7179	0.531667	-1.21271	2.21399	0.583864	0.833132
FBgn0020887	Su(z)12	10.3052	0.0458799	0.135967	0.73579	0.914097
FBgn0020906	Jon25Bi	1.37532	-0.58676	1.80386	0.744969	0.917561
FBgn0020908	Scp1	-0.343765	0	2.13958	1	1
FBgn0020909	Rtc1	8.87722	-0.290525	0.258117	0.260354	0.631001
FBgn0020910	RpL3	16.3586	0.452605	0.214723	0.0350434	0.280618
FBgn0020912	Ptx1	-0.786719	0.92016	3.78183	0.807765	0.948262
FBgn0020930	Dgkepsilon	9.43588	0.28919	0.177468	0.103201	0.440533
FBgn0021738	Crg-1	-0.210948	-0.432271	2.89977	0.881498	0.983046
FBgn0021742	C901	2.78713	-0.188726	1.34535	0.888438	0.986041
FBgn0021750	SerRS-m	8.72191	0.261318	0.119688	0.0290121	0.264356
FBgn0021760	chb	10.943	-0.243768	0.192084	0.204416	0.576067
FBgn0021761	Nup154	10.8941	-0.560738	0.436242	0.198658	0.570347
FBgn0021764	sdk	13.0372	-0.137462	0.196584	0.484396	0.777337
FBgn0021765	scu	11.6252	0.961145	0.337991	0.00445933	0.20054
FBgn0021767	org-1	1.01402	0.0423449	0.951094	0.964488	1
FBgn0021768	nudC	10.5411	-0.267872	0.217415	0.217922	0.589841
FBgn0021776	mira	5.43817	0.966157	0.552688	0.0804456	0.400197
FBgn0021795	Tapdelta	12.7708	0.638113	0.279725	0.0225357	0.244326
FBgn0021796	Tor	11.0026	-0.353351	0.316694	0.26453	0.634081
FBgn0021800	Reph	9.6482	0.358648	0.301745	0.234605	0.606709
FBgn0021814	Vps28	9.38972	-0.0701352	0.221386	0.751395	0.921125
FBgn0021825	DCTN2-p50	10.7378	0.392306	0.181811	0.0309463	0.269841
FBgn0021847	Ttc7	9.24556	-0.147089	0.158306	0.352812	0.694329
FBgn0021856	l(2)k14505	9.20465	-0.246665	0.261154	0.344903	0.687712
FBgn0021872	Xbp1	12.9194	0.451381	0.251393	0.0725714	0.384489
FBgn0021874	Nle	9.28947	-0.00761532	0.248538	0.975556	1
FBgn0021875	Zfrp8	8.9428	0.581062	0.247628	0.0189498	0.231891
FBgn0021895	ytr	11.7425	0.529654	0.22519	0.018671	0.230608
FBgn0021906	RFeSP	10.9408	1.14774	0.392522	0.00345536	0.20054
FBgn0021944	Coprox	9.73495	0.94946	0.259006	0.00024658	0.0883205
FBgn0021967	ND-PDSW	10.1675	0.300097	0.190724	0.115611	0.460072
FBgn0021979	l(2)k09913	11.9869	0.414063	0.19056	0.0297899	0.266504
FBgn0021995	Rs1	10.0959	0.135772	0.135112	0.314953	0.667517
FBgn0022023	eIF3h	12.3703	-0.185102	0.234468	0.429846	0.744927
FBgn0022027	Vps25	8.8842	0.552548	0.230792	0.0166596	0.22126
FBgn0022029	l(2)k01209	10.2729	-0.417279	0.364717	0.252575	0.624183
FBgn0022069	Nnp-1	10.7834	-0.158074	0.142826	0.268399	0.636741
FBgn0022097	Vha36-1	10.4441	-0.236776	0.343077	0.490098	0.781104
FBgn0022153	l(2)k05819	10.88	-0.360802	0.254762	0.156708	0.522934
FBgn0022160	Gpo1	6.83499	-0.0138716	0.406765	0.972796	1
FBgn0022213	Cse1	11.6029	-0.59287	0.481562	0.21827	0.590191
FBgn0022224	ubl	8.78236	-0.42599	0.952701	0.654775	0.870171
FBgn0022238	lolal	11.5793	-0.291099	0.232555	0.210663	0.58342
FBgn0022288	l(2)09851	10.1337	-0.193607	0.244409	0.428275	0.744479
FBgn0022338	dnk	8.68017	-0.455336	0.443121	0.304154	0.660876
FBgn0022343	CG3760	12.025	0.64443	0.268233	0.0162833	0.219137
FBgn0022344	CG10340	9.47209	-0.174837	0.340983	0.608131	0.845026
FBgn0022349	CG1910	12.1633	-0.0237334	0.130892	0.856116	0.97215
FBgn0022355	Tsf1	15.0655	0.810956	0.735856	0.270436	0.63778
FBgn0022359	Sodh-2	5.11755	-0.0600015	0.559202	0.914552	0.993931
FBgn0022361	Pur-alpha	10.1648	0.88288	0.95638	NA	NA
FBgn0022382	Pka-R2	8.66525	0.689956	0.300233	0.0215579	0.241702
FBgn0022699	D19B	10.3741	0.342729	0.193744	0.0768981	0.392167
FBgn0022702	Cht2	12.7027	0.637781	0.260855	0.0144867	0.21393
FBgn0022709	Ak1	6.66405	0.132809	0.18826	0.480525	0.775823
FBgn0022710	Ac13E	8.02086	0.424244	0.203655	0.0372371	0.285621
FBgn0022724	Taf8	8.4683	0.279098	0.155074	0.0718963	0.382283
FBgn0022764	Sin3A	13.0309	-0.16657	0.261481	0.524109	0.79771
FBgn0022768	Pp2C1	10.4229	0.109638	0.207491	0.597223	0.838597
FBgn0022770	Peritrophin-A	4.65021	-0.0612014	0.657998	0.925894	0.998504
FBgn0022774	Oat	7.84683	-0.00749839	0.400173	0.98505	1
FBgn0022786	Hira	9.1056	-0.0821145	0.33102	0.804084	0.946813
FBgn0022787	Hel89B	11.3452	-0.144246	0.200763	0.472456	0.770611
FBgn0022800	Cad96Ca	8.95837	-0.0224929	0.310665	0.942282	1
FBgn0022893	Df31	15.7762	0.430931	0.195984	0.0278917	0.261949
FBgn0022935	D19A	10.5833	0.173267	0.146846	0.23803	0.610531
FBgn0022936	CycH	8.62902	-0.200707	0.306472	0.512535	0.792745
FBgn0022942	Cbp80	11.3426	-0.2586	0.263403	0.326216	0.675055
FBgn0022943	Cbp20	9.44231	0.333345	0.153972	0.0303904	0.269338
FBgn0022959	yps	13.6806	0.840212	0.29588	0.00451557	0.20054
FBgn0022960	vimar	10.5667	0.275375	0.131979	0.0369332	0.285621
FBgn0022981	rpk	7.94741	-0.344437	0.346231	0.319824	0.670257
FBgn0022984	qkr58E-3	11.1463	-0.201135	0.189589	0.288735	0.647599
FBgn0022985	qkr58E-2	10.4082	0.648016	0.224101	0.00383258	0.20054
FBgn0022986	qkr58E-1	10.8184	0.705054	0.211023	0.000834429	0.136305
FBgn0022987	qkr54B	10.2955	-0.0546122	0.117636	0.642472	0.86315
FBgn0023000	mth	11.1391	-0.721285	0.701391	0.303779	0.660777
FBgn0023001	melt	12.0389	-0.00835018	0.122903	0.945833	1
FBgn0023023	CRMP	12.4012	0.517565	0.295439	0.0797996	0.398661
FBgn0023081	gek	10.8404	-0.437704	0.286588	0.126688	0.477505
FBgn0023083	fray	9.99197	-0.276789	0.253708	0.275285	0.640945
FBgn0023090	dtr	5.46329	0.00360448	0.8833	0.996744	1
FBgn0023094	cyc	10.086	-0.211366	0.150302	0.159643	0.525915
FBgn0023095	caps	10.7556	0.141651	0.138691	0.307092	0.662933
FBgn0023096	btv	4.86884	-0.704444	0.547874	0.198521	0.570347
FBgn0023097	bon	11.6025	0.62188	0.227464	0.00625751	0.20054
FBgn0023129	aay	7.26756	-0.314007	0.276236	0.25565	0.626652
FBgn0023130	a6	9.30606	0.986012	0.32865	0.0026981	0.199862
FBgn0023143	Uba1	13.7263	-0.121107	0.163794	0.459672	0.763001
FBgn0023167	SmD3	11.1799	0.670724	0.241305	0.00544298	0.20054
FBgn0023169	AMPKalpha	11.2046	0.63135	0.255315	0.0134051	0.210602
FBgn0023170	RpL39	13.4736	-0.212014	1.01082	0.833867	0.961588
FBgn0023171	rnh1	8.62561	-0.262604	0.163092	0.107363	0.448978
FBgn0023172	RhoGEF2	12.1569	-0.166305	0.2054	0.418132	0.739343
FBgn0023174	Prosbeta2	11.6093	-0.224684	0.355399	0.527254	0.800316
FBgn0023175	Prosalpha7	11.5715	0.0661829	0.139713	0.635709	0.860326
FBgn0023177	Pp4-19C	11.5712	0.392109	0.152802	0.0102841	0.204255
FBgn0023179	amon	2.83832	0.472336	0.832296	0.570368	0.823885
FBgn0023180	Orc6	6.5873	-0.725496	0.431391	0.0926154	0.420812
FBgn0023181	Orc4	8.82005	-0.053368	0.310567	0.863563	0.974567
FBgn0023197	Jon74E	-0.788665	-0.446727	3.90872	0.909008	0.992933
FBgn0023212	EloB	10.9796	0.390584	0.212847	0.066499	0.368331
FBgn0023213	eIF4G1	12.415	-0.470598	0.37766	0.212732	0.585757
FBgn0023214	edl	9.11898	-0.212424	0.137124	0.121349	0.468471
FBgn0023215	Mnt	10.3529	0.742406	0.42049	0.0774678	0.394175
FBgn0023216	Parg	8.76757	-0.286487	0.245117	0.242494	0.615722
FBgn0023388	Dap160	10.6863	0.145622	0.149904	0.331333	0.678823
FBgn0023395	Chd3	7.03922	-0.426533	0.333747	0.201245	0.573481
FBgn0023407	B4	11.1521	0.0382954	0.112249	0.73298	0.912462
FBgn0023415	Acp32CD	8.21072	0.37581	0.287976	0.19189	0.561815
FBgn0023416	Ac3	8.49146	-0.628704	0.438004	0.151177	0.51537
FBgn0023441	fus	12.553	0.473799	0.267379	0.076393	0.392167
FBgn0023458	Rbcn-3A	11.8063	0.287916	0.244155	0.238304	0.610743
FBgn0023477	Taldo	11.6917	0.361014	0.162078	0.0259198	0.255098
FBgn0023479	teq	7.33419	-1.12589	0.717548	0.11663	0.461608
FBgn0023489	Pph13	0.644125	-2.03713	1.37877	0.139541	0.498001
FBgn0023496	Lip1	1.79099	0	1.66333	1	1
FBgn0023506	Es2	8.28022	0.484943	0.200213	0.0154295	0.215689
FBgn0023507	D2hgdh	6.92172	-0.0578483	0.453462	0.898489	0.988877
FBgn0023508	Ocrl	10.0348	0.430331	0.183433	0.0189768	0.231891
FBgn0023509	mip130	10.6021	0.346122	0.184737	0.0609868	0.351641
FBgn0023510	Rbcn-3B	9.99205	0.0942112	0.162033	0.560949	0.819379
FBgn0023511	Edem1	10.1546	-0.0586732	0.16753	0.72617	0.909732
FBgn0023512	eIF2Bepsilon	9.92462	0.24228	0.13719	0.0773921	0.39396
FBgn0023513	CG14803	8.79567	0.109137	0.205175	0.594779	0.838356
FBgn0023514	CG14805	9.57416	-0.0278967	0.0908725	0.758853	0.924906
FBgn0023515	CG14814	9.21638	0.0690531	0.165067	0.675704	0.88077
FBgn0023516	Pex5	8.89034	0.257406	0.146232	0.0783634	0.396259
FBgn0023517	Pgam5	10.0761	0.808246	0.275047	0.00329722	0.199862
FBgn0023518	trr	10.8664	0.292376	0.204087	0.151972	0.515804
FBgn0023519	mRpL16	9.16962	0.404444	0.219976	0.0659766	0.36621
FBgn0023520	CG3857	8.76801	0.709433	0.250323	0.00459587	0.20054
FBgn0023521	CG3587	8.40521	0.505598	0.193144	0.00885201	0.20054
FBgn0023522	CG11596	9.67484	-0.302499	0.215184	0.159793	0.526261
FBgn0023523	Or2a	3.53442	-0.218673	0.528209	0.678882	0.882673
FBgn0023524	CG3078	3.31727	0.150249	0.578469	0.795068	0.942031
FBgn0023525	CG3191	3.65236	0.352336	0.493649	0.47539	0.772599
FBgn0023526	CG2865	9.57116	0.765992	0.346588	0.0270988	0.26086
FBgn0023527	CG3071	9.07767	-0.102736	0.283371	0.716943	0.90508
FBgn0023528	CG2924	11.0995	0.113146	0.260409	0.663931	0.874305
FBgn0023529	CG2918	13.0677	-0.152359	0.175244	0.384623	0.717185
FBgn0023530	CG3740	7.75231	0.940024	0.411934	NA	NA
FBgn0023531	CG32809	8.77965	0.568379	0.335002	0.089764	0.414608
FBgn0023534	CG17778	3.70728	-0.476764	0.466988	0.307285	0.662933
FBgn0023535	arg	6.2259	1.27173	0.771215	0.0991493	0.434859
FBgn0023536	CG3156	8.04866	-0.180372	0.25972	0.487376	0.779341
FBgn0023537	CG17896	11.7085	-0.124228	0.137828	0.367415	0.704207
FBgn0023540	CG3630	9.48548	0.574105	0.216121	0.00789771	0.20054
FBgn0023541	Cyp4d14	5.49471	-0.232959	0.452182	0.60642	0.844193
FBgn0023542	Nmd3	9.55125	0.319594	0.183546	0.0816442	0.401409
FBgn0023545	PIG-K	9.53118	-0.199959	0.192796	0.299664	0.65598
FBgn0023549	Mct1	8.97356	-0.0945802	0.479049	0.843489	0.966707
FBgn0023550	FarO	1.43163	0.00692536	1.15507	0.995216	1
FBgn0024150	Ac78C	4.00329	0.22287	0.609416	0.714581	0.903365
FBgn0024179	wit	10.3271	-0.0287857	0.15338	0.851131	0.969471
FBgn0024183	vig	11.7647	0.71357	0.283804	0.0119268	0.209107
FBgn0024184	unc-4	4.8817	0.0096558	1.05433	0.992693	1
FBgn0024187	syd	10.4235	0.0422502	0.150388	0.778755	0.932537
FBgn0024188	san	9.88548	-0.280472	0.20856	0.17869	0.548458
FBgn0024189	sns	10.1228	0.268943	0.234248	0.250923	0.62281
FBgn0024191	sip1	9.00144	0.233425	0.152332	0.125437	0.47491
FBgn0024194	rasp	8.77986	-0.502541	0.361303	0.164252	0.530857
FBgn0024196	robl	9.65951	-0.621891	0.504285	0.217496	0.589187
FBgn0024222	IKKbeta	8.57257	-0.773407	0.41602	0.0630181	0.358112
FBgn0024227	aurB	9.38393	1.30992	0.451961	0.00375177	0.20054
FBgn0024230	Hs2st	8.78534	-0.239199	0.302643	0.429313	0.744756
FBgn0024232	gprs	3.91326	-0.384472	0.336845	0.253708	0.625053
FBgn0024234	gbb	12.1857	0.687012	0.264374	0.0093595	0.20054
FBgn0024236	foi	10.2971	-0.348892	0.198132	0.0782538	0.395959
FBgn0024238	Fim	11.0056	-0.289024	0.281879	0.305199	0.661433
FBgn0024244	drm	10.1979	-0.244743	0.41478	0.555153	0.817161
FBgn0024245	dnt	10.3473	-0.497733	0.301628	0.0989108	0.434781
FBgn0024248	chico	9.42736	-0.681945	0.409716	0.0960259	0.427505
FBgn0024249	cato	1.9059	0.419564	1.20729	0.728197	0.910438
FBgn0024250	brk	10.6887	0.105026	0.10725	0.327448	0.675822
FBgn0024251	bbx	1.44688	-0.703999	1.30637	0.589957	0.835721
FBgn0024273	WASp	9.50824	0.336508	0.222621	0.130642	0.482495
FBgn0024277	trio	12.004	0.0708642	0.155905	0.649445	0.867002
FBgn0024285	Srp54	11.6862	0.339272	0.179066	0.0581354	0.342894
FBgn0024288	Sox100B	5.28499	-0.563773	0.41902	0.178478	0.548206
FBgn0024289	Sodh-1	3.90307	2.10913	2.89687	NA	NA
FBgn0024291	Sirt1	10.9552	-0.157106	0.109255	0.150441	0.51434
FBgn0024293	Spn43Ab	3.63914	-0.866829	1.84408	0.638312	0.861188
FBgn0024294	Spn43Aa	17.3852	0.286144	0.623576	0.646323	0.86516
FBgn0024314	Plap	11.1319	0.0786419	0.117955	0.504958	0.788872
FBgn0024315	Picot	3.78648	-0.601625	0.507715	0.23603	0.608215
FBgn0024320	Npc1a	10.899	-0.746686	0.570663	0.190719	0.561081
FBgn0024321	NK7.1	8.4015	0.28451	0.129208	0.0276685	0.261949
FBgn0024326	Mkk4	10.5005	0.244131	0.168645	0.147728	0.51027
FBgn0024329	Mekk1	11.3062	-0.20448	0.200092	0.306813	0.662933
FBgn0024330	MED6	9.34086	-0.229569	0.268578	0.392685	0.723319
FBgn0024352	Stip1	12.1216	0.018154	0.124102	0.883699	0.983566
FBgn0024360	MTPAP	8.86032	0.473839	0.242343	0.0505547	0.32144
FBgn0024361	Tsp2A	4.01482	1.31893	0.683266	0.0535666	0.330976
FBgn0024362	Naa30A	10.5294	0.1849	0.122882	0.132401	0.485592
FBgn0024364	CG11417	9.29988	0.209491	0.142157	0.140573	0.49868
FBgn0024365	CG12773	10.7079	0.35533	0.164953	0.0312296	0.270988
FBgn0024366	CG11409	10.8366	-0.437889	0.311771	0.160164	0.526604
FBgn0024371	E2f2	9.40189	-0.642225	0.491143	0.191004	0.561204
FBgn0024432	Dlc90F	10.9673	-0.380807	0.254354	0.134354	0.489749
FBgn0024491	Bin1	9.89528	-0.408509	0.25655	0.111314	0.455019
FBgn0024509	Sec13	11.5211	0.404282	0.188586	0.0320522	0.273148
FBgn0024510	dlt	7.94841	-0.352781	0.27453	0.19878	0.570424
FBgn0024542	Neos	8.98335	-0.21046	0.202307	0.298199	0.654246
FBgn0024555	flfl	11.8735	0.0820447	0.141524	0.562101	0.819542
FBgn0024556	mEFTu1	11.0531	0.413909	0.199975	0.0384709	0.288468
FBgn0024558	Dph5	10.0612	0.639286	0.24493	0.00905235	0.20054
FBgn0024689	fws	9.90802	0.170742	0.0790936	0.0308708	0.269823
FBgn0024698	Cpsf160	9.5879	-0.600892	0.426875	0.159233	0.525591
FBgn0024728	Slip1	10.413	-1.26838	0.995961	NA	NA
FBgn0024732	Drep1	8.06066	-0.28931	0.227911	0.204299	0.576053
FBgn0024733	RpL10	15.0345	-0.456403	0.705792	0.517856	0.794427
FBgn0024734	PRL-1	7.6582	-0.773016	1.34148	0.564453	0.820768
FBgn0024740	Lip2	0.0276734	0	5.20139	1	1
FBgn0024754	Flo1	10.9249	0.581736	0.264162	0.0276519	0.261949
FBgn0024804	Dbp80	10.4129	-0.421822	0.807675	0.601484	0.841167
FBgn0024806	DIP2	10.9893	-0.739471	0.524459	0.158548	0.525154
FBgn0024807	DIP1	12.8071	0.0313505	0.121534	0.796439	0.942857
FBgn0024811	Crk	10.6599	4.45733	0.864612	NA	NA
FBgn0024814	Clc	12.0776	0.334028	0.160149	0.0370032	0.285621
FBgn0024833	AP-1mu	10.7516	-0.340798	0.383683	0.374419	0.709463
FBgn0024836	stan	12.4748	-0.384046	0.351632	0.274753	0.640927
FBgn0024841	Pcd	9.95236	0.348199	0.191991	0.0697368	0.376904
FBgn0024846	p38b	9.76116	0.404745	0.207451	0.0510525	0.323214
FBgn0024887	kin17	9.5367	-0.297342	0.276513	0.282229	0.644005
FBgn0024889	Kap-alpha1	10.1288	-0.377142	0.245632	0.124688	0.473438
FBgn0024897	b6	3.97333	0.117905	0.580194	0.838966	0.964556
FBgn0024909	Taf7	8.42744	-0.588389	0.394995	0.136326	0.493078
FBgn0024912	agt	8.63715	-0.197788	0.18293	0.279597	0.642916
FBgn0024913	Actbeta	2.61083	-1.49922	1.17876	0.203424	0.575707
FBgn0024920	Ts	9.24059	-0.168542	0.26769	0.528944	0.800913
FBgn0024921	Tnpo	10.7943	-0.198884	0.20676	0.336094	0.683218
FBgn0024941	RSG7	4.20664	1.40352	0.665074	0.0348306	0.280448
FBgn0024944	Oamb	0.653648	-0.13495	1.18012	0.908958	0.992933
FBgn0024945	NitFhit	8.8844	-0.424891	0.319678	0.183808	0.553249
FBgn0024947	NTPase	10.5762	0.261514	0.11817	0.0268948	0.259932
FBgn0024956	Mat1	9.39816	-0.103357	0.243946	0.671794	0.878727
FBgn0024957	Irp-1B	11.3316	-0.141948	0.208729	0.496467	0.784209
FBgn0024958	Irp-1A	10.3184	-0.270522	0.345904	0.434172	0.747876
FBgn0024963	GluClalpha	2.76931	0.385396	0.727661	0.596364	0.838597
FBgn0024973	CG2701	10.0968	0.460086	0.198407	0.0204007	0.237171
FBgn0024975	CG2712	7.74309	0.438602	0.179526	0.0145611	0.21393
FBgn0024980	Syx4	2.49323	-1.54052	0.74356	0.0382822	0.288468
FBgn0024983	CG4293	9.88599	0.495467	0.215954	0.0217724	0.242098
FBgn0024984	CG3457	1.72676	0.995916	1.61122	0.536501	0.803527
FBgn0024985	Rilpl	10.5058	0.238469	0.187495	0.203419	0.575707
FBgn0024986	CG3719	9.03764	0.390831	0.171393	0.0225885	0.244326
FBgn0024987	ssx	11.2217	0.125997	0.123345	0.30702	0.662933
FBgn0024989	CG3777	10.0948	-0.312583	0.245389	0.202726	0.575184
FBgn0024991	CG2694	8.94098	-0.0892093	0.32759	0.785376	0.936556
FBgn0024992	Spg7	9.01808	0.222906	0.161279	0.166938	0.535178
FBgn0024993	CG2662	7.47985	0.138458	0.193375	0.473988	0.772125
FBgn0024994	Ugalt	9.77592	0.287252	0.134128	0.0322239	0.273174
FBgn0024995	CG2680	-0.230059	1.80162	1.93545	0.35193	0.694148
FBgn0024996	eIF2Bbeta	9.74871	-0.0943075	0.19031	0.620215	0.850375
FBgn0024997	CG2681	0.76559	0.116674	1.6165	0.942461	1
FBgn0024998	CG2685	9.24321	0.66201	0.223731	0.00308677	0.199862
FBgn0025109	Bem46	8.40189	0.0823242	0.155791	0.597203	0.838597
FBgn0025111	Ant2	6.92667	-0.0405028	0.250844	0.871726	0.978705
FBgn0025185	az2	8.29521	-0.265292	0.209864	0.20619	0.578458
FBgn0025186	ari-2	10.5245	-0.0310101	0.159363	0.845716	0.967599
FBgn0025334	PHDP	-1.05873	-0.493335	4.44071	0.911542	0.993173
FBgn0025335	Cpes	9.2613	0.845622	0.32411	0.00907913	0.20054
FBgn0025336	CG4882	9.49038	-0.215209	0.381967	0.573147	0.825868
FBgn0025352	Mtpbeta	11.9028	0.512353	0.204983	0.0124373	0.209107
FBgn0025360	Optix	8.93247	0.619217	0.22632	0.00621863	0.20054
FBgn0025366	Ip259	12.1265	-0.40368	0.235916	0.0870595	0.413194
FBgn0025373	Fpps	10.9079	0.171099	0.196372	0.38359	0.716521
FBgn0025381	rush	10.4888	0.599219	0.261989	0.0221847	0.243218
FBgn0025382	Rab27	7.81878	0.969634	0.365536	0.00798665	0.20054
FBgn0025383	CG14780	-0.255701	-3.27001	2.23777	0.143939	0.504247
FBgn0025387	CG12184	2.62361	4.78236	1.37074	0.000485035	0.114662
FBgn0025388	CG12179	9.09423	-0.339936	0.184107	0.0648339	0.363474
FBgn0025390	Mur2B	8.05926	-0.117483	0.315622	0.709725	0.900584
FBgn0025391	Scgdelta	0.961411	-1.35126	1.13807	0.235097	0.607246
FBgn0025393	CG14795	1.26893	-0.536512	0.979989	0.584058	0.83316
FBgn0025394	inc	11.3648	-0.211358	0.179732	0.23961	0.611573
FBgn0025454	Cyp6g1	10.3339	1.42484	1.29851	0.272514	0.639349
FBgn0025455	CycT	11.2273	0.328181	0.192967	0.0889965	0.414539
FBgn0025456	CREG	8.91033	-0.517905	0.787667	0.510848	0.792406
FBgn0025457	Bub3	11.2484	-0.264955	0.323616	0.412939	0.736635
FBgn0025463	Bap60	12.1451	0.598726	0.21083	0.00451338	0.20054
FBgn0025469	slv	8.90666	-0.00693598	0.122253	0.954757	1
FBgn0025519	fidipidine	9.40262	-0.279062	0.332255	0.400963	0.728683
FBgn0025525	bab2	9.66766	0.783826	0.336665	0.0199011	0.235972
FBgn0025549	unc-119	10.0083	0.377638	0.266707	0.156796	0.522934
FBgn0025558	CG4101	8.49052	1.04346	0.361694	0.00391515	0.20054
FBgn0025571	SF1	12.0907	0.603437	0.259876	0.0202321	0.237011
FBgn0025574	Pli	11.0456	-0.107542	0.141803	0.448216	0.75555
FBgn0025578	Lcp9	3.33088	0.921593	1.26144	0.465029	0.76619
FBgn0025582	eIF3e	12.4348	-0.329522	0.28969	0.25533	0.626652
FBgn0025592	Gk1	9.00142	-0.233823	0.211235	0.268322	0.636732
FBgn0025595	AkhR	3.76797	1.08076	1.61212	0.502603	0.787332
FBgn0025608	Faf2	10.3553	0.277493	0.119734	0.0204727	0.237171
FBgn0025613	CG3081	0.402817	-1.45352	2.03153	0.474311	0.772154
FBgn0025615	Torsin	10.929	-0.370463	0.35181	0.292331	0.650603
FBgn0025616	CG13359	-0.4018	1.41624	2.07144	0.494165	0.783139
FBgn0025620	CG13360	5.9547	1.18089	1.11524	0.289659	0.648911
FBgn0025621	CG16989	9.92361	-0.109728	0.162805	0.500321	0.786409
FBgn0025624	CG4025	8.43527	0.0466431	0.154775	0.76314	0.926681
FBgn0025625	Sik2	6.80357	0.471296	0.321774	0.143008	0.50308
FBgn0025626	CG4281	10.4346	0.21178	0.0964861	0.0281689	0.262648
FBgn0025627	CG4194	7.25032	-0.225857	0.309947	0.466188	0.767244
FBgn0025628	CG4199	11.2929	0.160543	0.132427	0.225392	0.596536
FBgn0025629	CG4045	9.17412	0.272729	0.151515	0.0718594	0.382283
FBgn0025630	Rtca	9.68838	0.290593	0.131457	0.027067	0.26086
FBgn0025631	moody	8.50736	0.594039	0.335895	0.0769735	0.392167
FBgn0025632	CG4313	7.31042	-0.552648	0.27907	0.0476672	0.314237
FBgn0025633	CG13366	11.5616	-0.0221293	0.134733	0.869538	0.977667
FBgn0025634	CG13367	9.48309	0.592838	0.249992	0.0177194	0.226519
FBgn0025635	CG17829	8.89837	0.349488	0.134642	0.00944062	0.20054
FBgn0025637	SkpA	11.9276	-0.474995	0.335732	0.157126	0.523312
FBgn0025638	Roc1a	11.7317	0.308561	0.161573	0.056168	0.338382
FBgn0025639	Hmt4-20	12.0803	0.0453014	0.158395	0.774877	0.930608
FBgn0025640	CG13369	8.90425	0.743075	0.346991	0.0322354	0.273174
FBgn0025641	DAAM	10.1072	0.445466	0.427482	0.29738	0.653754
FBgn0025642	CG32812	3.15509	-0.965731	0.523678	0.065164	0.36438
FBgn0025643	CG3588	3.61186	0.995925	1.66633	0.550056	0.813929
FBgn0025644	CG14424	2.25768	1.84086	1.17774	0.118043	0.463546
FBgn0025674	CycK	10.6711	0.0219292	0.141585	0.876913	0.980895
FBgn0025676	CkIIalpha-i3	8.0052	-0.159088	0.203247	0.433785	0.747506
FBgn0025678	CaBP1	12.9085	0.302973	0.132576	0.0222962	0.243813
FBgn0025680	cry	6.75807	-0.0986202	0.18887	0.60156	0.841173
FBgn0025681	CG3558	10.8177	0.246513	0.160345	0.124198	0.47264
FBgn0025682	scf	10.8873	-0.0982859	0.13653	0.471596	0.769713
FBgn0025683	CG3164	12.1294	-0.491045	0.2626	0.0614927	0.353351
FBgn0025684	MFS18	9.06967	-0.373313	0.335578	0.265946	0.635175
FBgn0025686	Amnionless	1.45784	-1.72854	1.77767	0.330869	0.678264
FBgn0025692	Lfg	2.8909	-1.67088	0.726422	0.0214395	0.24066
FBgn0025693	ZnT41F	8.60103	-0.582313	0.464226	0.209706	0.581996
FBgn0025697	santa-maria	4.30082	-0.715559	1.31859	0.587357	0.834957
FBgn0025700	CG5885	12.3118	-0.104421	0.21261	0.623328	0.851185
FBgn0025702	Srpk79D	6.14624	0.0919799	0.232657	0.692587	0.890038
FBgn0025709	CNT2	4.27506	1.61679	0.927874	0.0814263	0.401409
FBgn0025712	CG13920	5.03357	-0.582799	0.279761	0.0372326	0.285621
FBgn0025716	Bap55	10.7302	-0.134704	0.257396	0.600741	0.840724
FBgn0025720	Ate1	10.0405	0.705263	0.283018	0.0127049	0.209968
FBgn0025724	beta'COP	12.0921	-0.0634906	0.136538	0.641929	0.862816
FBgn0025725	alphaCOP	12.3318	0.00596406	0.151675	0.968634	1
FBgn0025726	unc-13	12.2692	-0.440257	0.396223	0.266511	0.635455
FBgn0025739	pon	9.86445	0.160575	0.143974	0.264718	0.634081
FBgn0025740	PlexB	9.62221	-0.0814738	0.75246	0.913776	0.993546
FBgn0025741	PlexA	11.586	-0.247195	0.954949	NA	NA
FBgn0025742	mtm	10.3418	0.524471	0.207776	0.0115958	0.208302
FBgn0025743	mbt	10.941	0.436933	0.204066	0.0322632	0.273174
FBgn0025777	homer	10.712	0.841016	0.319263	0.00843242	0.20054
FBgn0025781	Cdc16	9.1224	-0.609458	0.493178	0.216541	0.588947
FBgn0025790	TBPH	11.1877	0.252237	0.158981	0.112607	0.456904
FBgn0025800	Smox	11.3408	0.522499	0.247751	0.0349472	0.280618
FBgn0025802	Sbf	9.73368	-0.377274	0.285857	0.186902	0.555871
FBgn0025807	Rad9	7.79618	-0.0539624	0.277451	0.845789	0.967599
FBgn0025808	Rad17	7.8253	-0.545968	0.400336	0.172639	0.542025
FBgn0025809	Paf-AHalpha	10.1198	-0.184218	0.0944508	0.0511276	0.323372
FBgn0025814	Mgstl	10.1975	0.660102	0.238347	0.00561428	0.20054
FBgn0025815	Mcm6	10.63	0.206649	0.190184	0.277226	0.641942
FBgn0025820	JTBR	8.53967	-0.224545	0.239047	0.34756	0.690197
FBgn0025827	CG6421	2.001	-0.0250202	1.30811	0.98474	1
FBgn0025830	IntS8	9.45826	-0.234398	0.207772	0.259256	0.62961
FBgn0025832	Fen1	8.92606	0.469271	0.249638	0.0601341	0.349624
FBgn0025833	CG8910	4.69108	0.372478	0.286431	0.19346	0.563867
FBgn0025835	CG17707	8.01273	-0.917906	0.818878	0.262318	0.632635
FBgn0025836	RhoGAP1A	11.7544	-0.422184	0.278692	0.129803	0.482107
FBgn0025837	CG17636	-0.457947	-1.34448	1.75834	0.444493	0.753356
FBgn0025839	ND-B14.5A	9.25058	1.25157	0.424798	0.00321634	0.199862
FBgn0025864	Crag	11.8366	0.289481	0.197876	0.143484	0.503775
FBgn0025865	Cortactin	11.5639	0.165568	0.127692	0.194764	0.565768
FBgn0025866	CalpB	9.68581	-0.121976	0.168579	0.469341	0.768687
FBgn0025874	Meics	8.63765	-0.451049	0.322443	0.161859	0.527932
FBgn0025878	wrapper	7.34639	0.0295609	0.301443	0.921881	0.997129
FBgn0025879	Timp	7.30964	-0.376643	0.401154	0.347782	0.690197
[truncated: 10,012 more rows]

## Sheet: E.DESEQ2_WD_D907_NA_vs_C
Extended Data Table 2E |Differential expression analysis (DESeq2) in D907 non-assimilated vs control in wing disc.
GENEID	Symbol	log2BaseMean	log2FC	Stderr_log2FC	pvalue	padjust
FBgn0000008	a	12.5082	0.456443	0.208117	0.0282923	1
FBgn0000014	abd-A	3.54541	0.666165	1.11194	0.549104	1
FBgn0000015	Abd-B	0.161474	2.11542	2.15372	0.325993	1
FBgn0000017	Abl	11.4852	0.141999	0.232344	0.541094	1
FBgn0000018	abo	8.16282	-0.0435744	0.293124	0.881826	1
FBgn0000022	ac	8.1733	-0.263501	0.583037	0.651309	1
FBgn0000024	Ace	4.50888	0.963245	0.611003	0.114911	1
FBgn0000028	acj6	2.16252	-3.40041	1.29143	0.0084622	1
FBgn0000032	Acph-1	8.98686	-0.159749	0.345045	0.643378	1
FBgn0000036	nAChRalpha1	2.0714	-2.52409	0.971573	0.00937842	1
FBgn0000037	mAChR-A	3.06774	1.04391	0.984938	0.289204	1
FBgn0000038	nAChRbeta1	0.270634	-2.71126	1.92333	0.158638	1
FBgn0000039	nAChRalpha2	0.514662	-1.97831	2.52326	0.433023	1
FBgn0000042	Act5C	16.1769	0.0340233	0.126292	0.787621	1
FBgn0000043	Act42A	14.7455	-0.00106784	0.208222	0.995908	1
FBgn0000044	Act57B	8.56161	0.032293	0.522066	0.950677	1
FBgn0000045	Act79B	2.91455	-0.665582	1.67712	0.69147	1
FBgn0000046	Act87E	9.12651	0.25916	0.517601	0.616587	1
FBgn0000047	Act88F	7.48719	0.779542	1.54462	0.613783	1
FBgn0000052	Pfas	10.7093	-0.0550348	0.15447	0.721629	1
FBgn0000053	Gart	10.7954	-0.153707	0.225418	0.495319	1
FBgn0000055	Adh	-1.43097	-1.8852	5.11947	0.712694	1
FBgn0000057	adp	9.38864	0.0741695	0.147475	0.615013	1
FBgn0000061	al	10.5103	-0.194085	0.281324	0.490258	1
FBgn0000063	Mps1	8.067	0.0983551	0.290892	0.735276	1
FBgn0000064	Ald1	12.216	-0.291226	0.298607	0.32942	1
FBgn0000071	Ama	11.4544	0.0100943	0.22103	0.963574	1
FBgn0000075	amd	8.86571	-0.415368	0.206255	0.0440244	1
FBgn0000077	amx	7.46143	-0.0311066	0.314207	0.921138	1
FBgn0000078	Amy-d	0.235729	-0.574487	2.10833	0.78525	1
FBgn0000079	Amy-p	0.223185	1.67114	1.7615	0.342773	1
FBgn0000083	AnxB9	12.028	0.0889896	0.187294	0.634691	1
FBgn0000084	AnxB10	8.22781	-0.246495	0.311689	0.429039	1
FBgn0000092	dyw	3.96892	0.0201637	0.481375	0.966588	1
FBgn0000097	aop	11.9838	0.175102	0.232377	0.451133	1
FBgn0000100	RpLP0	15.4776	-0.0531319	0.248328	0.830579	1
FBgn0000108	Appl	9.49263	-0.0608074	0.313794	0.846347	1
FBgn0000109	Aprt	7.92934	0.000388433	0.544661	0.999431	1
FBgn0000114	bru1	6.61006	-0.583426	0.601682	0.332217	1
FBgn0000115	Arl1	10.1262	-0.0242921	0.0936242	0.795278	1
FBgn0000116	Argk	13.4026	-0.0675375	0.227753	0.766819	1
FBgn0000117	arm	14.6646	0.130617	0.133541	0.328022	1
FBgn0000119	arr	12.3442	0.130933	0.156211	0.40193	1
FBgn0000120	Arr1	-1.16408	0.559138	2.78919	0.841116	1
FBgn0000121	Arr2	4.10363	-0.645657	0.305142	0.0343514	1
FBgn0000137	ase	4.17788	-0.081751	0.729577	0.910782	1
FBgn0000139	ash2	9.72679	-0.00542983	0.220689	0.980371	1
FBgn0000140	asp	9.90051	0.238674	0.2501	0.339924	1
FBgn0000146	aub	3.32083	0.790783	0.506588	0.118524	1
FBgn0000147	aurA	8.68677	0.0722257	0.228836	0.752289	1
FBgn0000150	awd	14.514	-0.131087	0.348818	0.707063	1
FBgn0000152	Axs	9.11858	0.0341585	0.334562	0.918678	1
FBgn0000153	b	4.35572	0.00395853	0.71627	0.99559	1
FBgn0000157	Dll	11.0699	-0.0142116	0.322378	0.964838	1
FBgn0000158	bam	2.79957	0.0526615	0.700042	0.940035	1
FBgn0000163	baz	11.0637	0.196716	0.218422	0.367789	1
FBgn0000173	ben	12.0376	-0.0368506	0.0484998	0.447368	1
FBgn0000179	bi	11.1907	0.250749	0.315187	0.426291	1
FBgn0000180	bib	10.0409	0.0336504	0.316405	0.915303	1
FBgn0000181	bic	14.2884	-0.0736551	0.232616	0.751518	1
FBgn0000183	BicD	11.2121	0.110181	0.176835	0.533235	1
FBgn0000206	boss	5.24447	-2.11387	1.17029	0.0708753	1
FBgn0000212	brm	12.4185	0.208155	0.136851	0.128252	1
FBgn0000216	Brd	6.98789	-0.237374	0.219103	0.278635	1
FBgn0000221	brn	7.72859	-0.0969488	0.210175	0.6446	1
FBgn0000228	Bsg25D	10.0976	0.0669289	0.158491	0.672815	1
FBgn0000229	bsk	9.60373	-0.043226	0.983485	0.964943	1
FBgn0000233	btd	4.62465	0.404488	0.901846	0.653785	1
FBgn0000239	bur	10.8472	0.109741	0.347223	0.751961	1
FBgn0000241	bw	1.20565	0.166404	0.882862	0.850499	1
FBgn0000244	by	9.18267	0.117689	0.17874	0.51026	1
FBgn0000246	c(3)G	6.7144	0.0111625	0.662255	0.986552	1
FBgn0000247	ca	10.5521	0.155048	0.183336	0.397719	1
FBgn0000250	cact	11.2922	0.0404481	0.169877	0.811801	1
FBgn0000251	cad	-1.16213	0.475405	3.14593	0.879883	1
FBgn0000253	Cam	13.2495	0.0964976	0.244476	0.693056	1
FBgn0000256	capu	11.4909	0.00385616	0.203166	0.984857	1
FBgn0000257	car	8.91041	0.0947797	0.258721	0.714112	1
FBgn0000259	CkIIbeta	11.4756	0.0249786	0.310931	0.935971	1
FBgn0000261	Cat	14.2116	0.0851307	0.286646	0.766475	1
FBgn0000273	Pka-C1	10.9166	0.134624	0.257006	0.600405	1
FBgn0000276	CecA1	-1.12268	0.779541	2.65942	0.769427	1
FBgn0000278	CecB	-0.92001	-0.663147	3.73666	0.859139	1
FBgn0000279	CecC	0.484249	0	2.02099	1	1
FBgn0000283	Cp190	11.7955	0.167209	0.198447	0.399457	1
FBgn0000286	Cf2	9.43236	0.0325157	0.300394	0.913802	1
FBgn0000287	salr	11.536	0.0743753	0.146311	0.611216	1
FBgn0000289	cg	12.4473	0.213079	0.110645	0.0541303	1
FBgn0000299	Col4a1	10.9813	0.030475	0.365435	0.933539	1
FBgn0000303	ChAT	1.51051	1.02977	1.07578	0.33845	1
FBgn0000307	chif	10.9703	0.0832879	0.325694	0.798164	1
FBgn0000308	chic	14.3064	-0.0774306	0.28484	0.785746	1
FBgn0000316	cin	10.058	-0.146957	0.729269	0.840298	1
FBgn0000317	ck	11.6734	0.226743	0.291433	0.436552	1
FBgn0000318	cl	11.0586	-0.0820531	0.145921	0.573904	1
FBgn0000319	Chc	13.6819	0.149568	0.176579	0.39698	1
FBgn0000320	eya	8.04145	0.0322006	0.55129	0.953422	1
FBgn0000326	clt	8.55744	-0.11528	0.355129	0.745472	1
FBgn0000330	cm	9.97901	-0.0028904	0.294393	0.992166	1
FBgn0000337	cn	0.268373	-1.37488	2.46947	0.577697	1
FBgn0000339	cni	9.33396	-0.117906	1.05691	0.911174	1
FBgn0000346	comt	7.87932	0.0967958	0.191321	0.612904	1
FBgn0000351	cort	6.22092	0.0945468	0.225596	0.675144	1
FBgn0000352	cos	10.664	0.111116	0.123125	0.36681	1
FBgn0000357	Cp18	2.26944	-0.137198	0.750408	0.85493	1
FBgn0000359	Cp36	-1.09841	-3.03211	3.84028	0.429788	1
FBgn0000370	crc	11.8562	-0.0142509	0.920002	0.987641	1
FBgn0000376	crm	9.59012	0.169143	0.179037	0.344793	1
FBgn0000377	crn	10.1282	-0.0154868	0.114582	0.892485	1
FBgn0000382	csw	10.8077	0.0294923	0.316274	0.925705	1
FBgn0000384	cta	9.56275	-0.0537814	0.176823	0.761011	1
FBgn0000394	cv	10.5618	-0.00557853	0.160356	0.972249	1
FBgn0000395	cv-2	10.5947	-0.0944829	0.264125	0.720552	1
FBgn0000404	CycA	11.6284	0.0730134	0.352617	0.835962	1
FBgn0000405	CycB	11.6259	0.130525	0.115794	0.259651	1
FBgn0000406	Cyt-b5-r	5.2982	0.599458	2.0189	0.766526	1
FBgn0000411	D	1.5355	-0.715338	1.4114	0.612276	1
FBgn0000412	D1	13.5891	0.0146772	0.256817	0.954425	1
FBgn0000414	Dab	11.1883	0.146317	0.183798	0.42599	1
FBgn0000416	Sap-r	13.1179	0.00423063	0.181969	0.981451	1
FBgn0000422	Ddc	4.37445	-0.0631596	0.595958	0.915598	1
FBgn0000426	SmF	10.3072	-0.0884209	0.354745	0.803166	1
FBgn0000439	Dfd	1.0971	2.14472	2.52712	0.396057	1
FBgn0000442	Pkg21D	4.56965	-1.25155	1.46778	0.393836	1
FBgn0000447	Dhod	10.7814	-0.102791	0.0992452	0.300331	1
FBgn0000448	Hr3	4.10494	1.89909	1.69011	0.261164	1
FBgn0000449	dib	3.05652	-0.723959	0.856795	0.398133	1
FBgn0000451	ect	9.95842	-0.294088	0.375286	0.433253	1
FBgn0000454	Dip-B	11.6758	-0.0509038	0.309925	0.869538	1
FBgn0000455	Dip-C	9.61828	0.0310471	0.13054	0.812008	1
FBgn0000459	disco	7.46986	-0.0680522	0.308776	0.825565	1
FBgn0000463	Dl	11.501	-0.0232181	0.20726	0.910804	1
FBgn0000464	Lar	7.2388	-0.0856413	0.29811	0.773897	1
FBgn0000473	Cyp6a2	4.53412	1.61212	1.2343	0.191521	1
FBgn0000477	DNaseII	5.02373	-1.26096	1.38002	0.360859	1
FBgn0000479	dnc	9.6958	0.0259704	0.293524	0.929497	1
FBgn0000482	dor	9.87823	0.0695145	0.134022	0.603983	1
FBgn0000489	Pka-C3	8.22442	-0.372761	0.492173	0.448824	1
FBgn0000490	dpp	10.6253	0.0135043	0.251644	0.957203	1
FBgn0000492	Dr	11.2215	-0.0636004	0.266203	0.81117	1
FBgn0000499	dsh	10.6754	0.081597	0.15315	0.594177	1
FBgn0000500	Dsk	3.99865	1.47739	1.76116	0.40154	1
FBgn0000504	dsx	10.1355	-0.0443341	0.250625	0.859592	1
FBgn0000520	dwg	9.44223	0.0589118	0.250986	0.814425	1
FBgn0000524	dx	11.5684	0.10254	0.188273	0.586007	1
FBgn0000527	e	8.53797	-0.511712	0.828826	0.536975	1
FBgn0000533	ea	8.27345	0.243468	0.348775	0.485135	1
FBgn0000535	eag	1.29961	-1.98869	1.52089	0.191014	1
FBgn0000536	eas	9.98281	0.010675	0.321107	0.97348	1
FBgn0000541	E(bx)	12.0664	0.21072	0.415814	0.612319	1
FBgn0000542	ec	13.2154	0.227208	0.199513	0.254779	1
FBgn0000543	ecd	10.3592	0.0971653	0.146126	0.506088	1
FBgn0000546	EcR	11.3825	0.154218	0.222945	0.489108	1
FBgn0000547	ed	14.1759	0.105187	0.122413	0.390186	1
FBgn0000551	Edg78E	3.49525	0.514945	0.977166	0.598209	1
FBgn0000552	Edg84A	-0.343901	0	2.95722	1	1
FBgn0000557	eEF1alpha2	10.7252	-0.31328	0.696001	0.652628	1
FBgn0000559	eEF2	16.624	-0.0394686	0.148981	0.791068	1
FBgn0000560	eg	7.91871	0.745445	0.338698	0.0277423	1
FBgn0000562	egl	11.2869	0.185303	0.180776	0.305343	1
FBgn0000565	MsrA	10.4064	-0.199428	0.152736	0.191653	1
FBgn0000566	Eip55E	10.2507	-0.0247167	0.187477	0.895112	1
FBgn0000567	Eip74EF	12.0442	0.106286	0.410015	0.795463	1
FBgn0000568	Eip75B	12.8693	-0.0516416	0.348447	0.882181	1
FBgn0000575	emc	12.771	0.039568	0.412765	NA	NA
FBgn0000576	ems	9.84845	-0.101999	0.262334	0.697416	1
FBgn0000577	en	10.8604	-0.0437385	0.248417	0.86024	1
FBgn0000578	ena	12.9678	0.118519	0.225207	0.598702	1
FBgn0000579	Eno	13.0769	-0.0358259	0.280791	0.898474	1
FBgn0000581	E(Pc)	11.8884	0.266321	0.238505	0.264154	1
FBgn0000588	esc	7.87526	0.0406919	0.386472	0.916145	1
FBgn0000591	E(spl)m8-HLH	7.70229	-0.489661	0.427418	0.251949	1
FBgn0000592	Est-6	1.75108	-2.3334	1.95562	NA	NA
FBgn0000594	Est-P	3.72561	-0.518474	1.03355	0.615919	1
FBgn0000611	exd	12.3551	0.00356207	0.212341	0.986616	1
FBgn0000615	exu	4.00786	0.302165	0.335526	0.367817	1
FBgn0000617	e(y)1	9.49911	-0.0152407	0.284335	0.957253	1
FBgn0000618	e(y)2	8.7349	-0.164415	0.307223	0.592535	1
FBgn0000625	eyg	9.13554	-0.0884604	0.336404	0.792582	1
FBgn0000629	E(z)	9.78433	0.165866	0.336637	0.622214	1
FBgn0000633	CG17716	4.11325	0.0450716	0.770098	0.953329	1
FBgn0000635	Fas2	12.324	0.120889	0.134061	0.367191	1
FBgn0000636	Fas3	13.4312	0.061673	0.125292	0.622555	1
FBgn0000639	Fbp1	12.8779	-0.860969	1.00846	0.393246	1
FBgn0000640	Fbp2	11.2776	-0.963353	1.28123	0.452113	1
FBgn0000644	Fcp3C	6.28488	0.211545	0.540457	0.695489	1
FBgn0000658	fj	12.3458	-0.0773629	0.168271	0.645694	1
FBgn0000659	fkh	3.7818	-2.38109	1.50228	0.11297	1
FBgn0000662	fl(2)d	11.3682	0.0841104	0.179562	0.639484	1
FBgn0000667	Actn	12.0811	0.114017	0.214641	0.595281	1
FBgn0000709	fliI	10.1841	0.0992602	0.188481	0.598448	1
FBgn0000711	flw	10.3497	0.0308274	0.133086	0.816821	1
FBgn0000719	fog	9.0511	0.0159142	0.31731	0.96	1
FBgn0000721	for	11.0094	0.0609085	0.147374	0.679393	1
FBgn0000723	FER	11.4746	0.107234	0.267465	0.688475	1
FBgn0000808	gd	0.594464	1.83416	1.70691	0.282576	1
FBgn0000810	fs(1)K10	9.53715	-0.0608417	0.0779563	0.43512	1
FBgn0000826	png	4.02019	0.174631	0.463863	0.706567	1
FBgn0000927	fs(1)Ya	2.79337	0.0581958	1.52613	0.969582	1
FBgn0000928	fs(1)Yb	3.3155	0.646309	0.597508	0.279397	1
FBgn0000996	dup	9.71467	0.218391	0.174383	0.210437	1
FBgn0001075	ft	13.0076	0.179228	0.275194	0.514865	1
FBgn0001078	ftz-f1	7.29306	0.518141	0.664507	0.435545	1
FBgn0001079	fu	9.60463	0.0921801	0.139077	0.507459	1
FBgn0001083	fw	10.5026	-0.0286924	0.182133	0.874823	1
FBgn0001084	fy	9.29983	-0.00824555	0.288777	0.977221	1
FBgn0001085	fz	11.3015	-0.00550313	0.231888	0.981066	1
FBgn0001086	fzy	10.3743	-0.000692056	0.463813	0.998809	1
FBgn0001087	g	10.854	0.137815	0.132293	0.297533	1
FBgn0001089	Gal	10.1306	0.367169	0.755213	0.62684	1
FBgn0001090	bnb	19.6371	0.440276	0.422447	0.297317	1
FBgn0001091	Gapdh1	11.9762	-0.08773	0.240719	0.715523	1
FBgn0001092	Gapdh2	12.9744	-0.0183703	0.147767	0.901063	1
FBgn0001098	Gdh	12.6996	0.0646231	0.273985	0.813539	1
FBgn0001099	gdl	4.27269	0.135384	0.483865	0.779633	1
FBgn0001104	Galphai	11.8348	0.0107081	0.245196	0.965166	1
FBgn0001105	Gbeta13F	12.4649	0.0539343	0.248618	0.828258	1
FBgn0001108	DCTN1-p150	10.96	0.151886	0.148702	0.307059	1
FBgn0001112	Gld	9.16421	0.0620501	0.342654	0.856299	1
FBgn0001114	Glt	11.5477	0.105675	0.321585	0.742453	1
FBgn0001120	gnu	-0.741383	0.642116	1.95244	0.742248	1
FBgn0001122	Galphao	9.69085	0.106944	0.242056	0.658623	1
FBgn0001123	Galphas	11.1289	-0.0240177	0.241729	0.920854	1
FBgn0001124	Got1	11.2117	-0.00326744	0.345677	0.992458	1
FBgn0001125	Got2	10.8879	-0.123252	0.184055	0.503082	1
FBgn0001128	Gpdh1	8.53752	0.13579	0.14901	0.362149	1
FBgn0001133	grau	9.06305	-0.0263036	0.268062	0.921833	1
FBgn0001134	Grd	0.501322	-0.268142	1.45409	0.853695	1
FBgn0001137	grk	3.80696	-0.297935	0.54091	0.581768	1
FBgn0001138	grn	10.7993	0.0210622	0.349678	0.95197	1
FBgn0001139	gro	12.3221	0.192524	0.208076	0.354832	1
FBgn0001142	Gs1	9.40105	-0.514112	0.712703	0.470691	1
FBgn0001145	Gs2	7.32335	-0.0268595	0.3281	0.934755	1
FBgn0001147	gsb-n	2.41312	-0.238712	1.21385	0.844097	1
FBgn0001148	gsb	2.24677	0.575749	1.38824	0.678338	1
FBgn0001149	GstD1	14.1395	-0.199655	0.265379	0.451847	1
FBgn0001150	gt	5.42354	-0.0520839	0.300346	0.862327	1
FBgn0001168	h	9.45798	-0.0821809	0.285615	0.773551	1
FBgn0001169	H	11.3279	0.112913	0.276245	0.68273	1
FBgn0001170	H2.0	4.99778	0.422022	0.638625	0.508722	1
FBgn0001174	halo	-0.290952	1.77075	2.0711	0.39256	1
FBgn0001179	hay	9.24287	0.121355	0.144127	0.399787	1
FBgn0001180	hb	2.08171	-1.96528	1.77749	0.268878	1
FBgn0001185	her	9.1758	-0.00613518	0.272735	0.982053	1
FBgn0001186	Hex-A	10.5408	0.0214834	0.117655	0.855114	1
FBgn0001187	Hex-C	-0.00814323	-1.98772	1.89953	0.295363	1
FBgn0001189	hfw	10.3723	-0.00826953	0.177537	0.962849	1
FBgn0001197	His2Av	12.7412	0.0731787	0.180464	0.685108	1
FBgn0001202	hook	9.70643	0.00860607	0.139163	0.950689	1
FBgn0001206	Hmr	9.43568	0.180938	0.234132	0.439639	1
FBgn0001208	Hn	7.07876	-1.66239	0.878173	0.0583561	1
FBgn0001215	Hrb98DE	13.2374	0.10351	0.0679772	0.127829	1
FBgn0001216	Hsc70-1	1.14731	-0.278244	1.32444	0.833602	1
FBgn0001217	Hsc70-2	2.20603	1.5107	1.60929	0.347864	1
FBgn0001218	Hsc70-3	14.7337	0.245746	0.281863	0.383283	1
FBgn0001220	Hsc70-5	11.6742	0.0501589	0.133233	0.706563	1
FBgn0001222	Hsf	10.7147	0.110428	0.318209	0.728569	1
FBgn0001224	Hsp23	15.393	-0.335353	0.265774	0.207022	1
FBgn0001225	Hsp26	12.7386	0.0882323	0.520584	0.865413	1
FBgn0001226	Hsp27	15.9923	-0.132451	0.33507	0.692626	1
FBgn0001227	Hsp67Ba	13.4332	-0.0581695	0.241286	0.809493	1
FBgn0001228	CG4456	1.05183	0	2.04372	1	1
FBgn0001229	Hsp67Bc	6.67145	0.181487	0.793235	0.819029	1
FBgn0001230	Hsp68	8.19001	-0.0715663	0.761293	0.925104	1
FBgn0001233	Hsp83	14.7407	0.0923683	0.232168	0.69074	1
FBgn0001234	lncRNA:Hsromega	10.4432	-0.191913	0.481509	0.690214	1
FBgn0001235	hth	12.4616	0.0499577	0.310964	0.872366	1
FBgn0001247	Ide	10.3409	0.137421	0.449139	0.75963	1
FBgn0001248	Idh	13.387	-0.0152071	0.0927676	0.869789	1
FBgn0001250	if	11.3236	0.0533527	0.219543	0.807992	1
FBgn0001253	ImpE1	11.8999	0.524799	0.684778	0.443451	1
FBgn0001254	ImpE2	17.6025	-0.0299262	0.592438	0.959713	1
FBgn0001255	ImpE3	10.2702	0.1429	0.623624	0.818756	1
FBgn0001256	ImpL1	10.5067	0.744361	0.675263	0.270319	1
FBgn0001257	ImpL2	7.78052	0.100506	0.806195	NA	NA
FBgn0001258	Ldh	7.30256	0.12056	0.504466	0.811117	1
FBgn0001259	in	10.3767	-0.000768353	0.154437	0.99603	1
FBgn0001263	inaD	4.7339	-0.256754	0.247809	0.300157	1
FBgn0001269	inv	11.0263	0.0440653	0.20635	0.830901	1
FBgn0001276	ix	8.59441	-0.13708	0.366516	0.708399	1
FBgn0001280	janA	10.5886	-0.201474	0.306329	0.510729	1
FBgn0001281	janB	-0.563137	-0.704633	2.04578	0.730521	1
FBgn0001285	Jon44E	-0.932772	-1.65003	3.84322	0.66768	1
FBgn0001291	Jra	10.0339	0.0438623	0.205391	0.830894	1
FBgn0001296	kar	9.18239	0.0715645	0.260526	0.783552	1
FBgn0001297	kay	10.5246	-0.0420547	0.340358	0.901663	1
FBgn0001301	kel	10.8104	0.0795226	0.117512	0.498585	1
FBgn0001308	Khc	12.3588	0.147229	0.114558	0.198726	1
FBgn0001311	kkv	13.2338	0.0730311	0.169159	0.665937	1
FBgn0001316	klar	13.9596	0.195388	0.180782	0.279788	1
FBgn0001319	kn	10.6356	0.0967739	0.261978	0.711832	1
FBgn0001320	kni	9.15559	0.00635231	0.3294	0.984614	1
FBgn0001321	knk	10.2105	-0.00620812	0.535114	0.990744	1
FBgn0001323	knrl	8.21454	-0.0111572	0.302771	0.970604	1
FBgn0001324	kto	11.5518	0.260776	0.231588	0.26015	1
FBgn0001325	Kr	3.10068	-0.608625	1.26445	0.630277	1
FBgn0001330	kz	8.82968	0.0940731	0.363651	0.795874	1
FBgn0001341	Mybbp1A	9.79443	0.153298	0.199064	0.441244	1
FBgn0001404	egh	9.59484	0.198111	0.178425	0.266857	1
FBgn0001491	l(1)10Bb	9.26891	0.00632369	0.211276	0.976122	1
FBgn0001565	Hlc	10.5993	-0.0369615	0.249534	0.882247	1
FBgn0001612	Grip91	9.36058	0.126903	0.4566	0.781066	1
FBgn0001624	dlg1	11.5425	0.120881	0.113162	0.285428	1
FBgn0001941	ifc	9.5039	-0.0305989	0.0889154	0.730745	1
FBgn0001942	eIF4A	15.5877	-0.0804206	0.168648	0.633465	1
FBgn0001961	Arpc1	11.275	0.0497966	0.190354	0.79363	1
FBgn0001965	Sos	11.016	0.196639	0.205817	0.339372	1
FBgn0001967	NimC3	8.51843	0.126278	0.645359	0.844868	1
FBgn0001970	Pgant35A	10.0091	-0.0146692	0.251955	0.953572	1
FBgn0001977	CIAPIN1	10.2698	-0.0766724	0.224729	0.73297	1
FBgn0001978	stc	10.9181	0.128411	0.174883	0.462785	1
FBgn0001981	esg	9.75652	0.00884176	0.161072	0.956224	1
FBgn0001983	wor	1.53798	0.366366	0.7556	0.62777	1
FBgn0001986	Mtr4	9.92313	0.0720267	0.272438	0.791488	1
FBgn0001987	Gli	12.1422	0.025497	0.214319	0.905301	1
FBgn0001989	ND-B17	10.5112	-0.0646748	0.397452	0.870736	1
FBgn0001990	wek	8.45206	0.0190541	0.249101	0.939028	1
FBgn0001991	Ca-alpha1D	3.71858	-0.196587	0.70742	0.781094	1
FBgn0001992	Cyp303a1	2.31698	-0.0461153	0.551618	0.933374	1
FBgn0001994	crp	12.0417	0.146834	0.131523	0.264247	1
FBgn0001995	mRpL4	9.07588	0.0572237	0.319893	0.858029	1
FBgn0002021	l(2)37Bb	8.45923	0.032718	0.518224	0.949659	1
FBgn0002022	Catsup	11.1559	-0.0135261	0.109324	0.901533	1
FBgn0002023	Lim3	0.0291261	0.807783	1.95967	0.68019	1
FBgn0002031	l(2)37Cc	11.5317	-0.0803146	0.194791	0.680111	1
FBgn0002036	CG10561	6.79333	-0.0735155	0.189572	0.698166	1
FBgn0002044	swm	11.3503	0.133376	0.197301	0.49904	1
FBgn0002069	AspRS	11.9113	-0.0257131	0.247333	0.9172	1
FBgn0002121	l(2)gl	11.6555	0.107986	0.449957	0.810337	1
FBgn0002174	CG5504	10.3957	0.0641649	0.371144	0.862742	1
FBgn0002183	dre4	12.1584	0.168055	0.177221	0.342987	1
FBgn0002283	l(3)73Ah	9.38592	-0.0385231	0.17046	0.821206	1
FBgn0002284	Prosbeta6	11.3948	-0.0913306	0.216275	0.672813	1
FBgn0002306	sas	12.7305	0.145019	0.135725	0.285305	1
FBgn0002354	l(3)87Df	6.1042	-0.390819	0.335997	0.244764	1
FBgn0002413	dco	12.0235	0.126701	0.160114	0.428759	1
FBgn0002431	hyd	12.1602	0.187786	0.254835	0.461188	1
FBgn0002440	l(3)mbn	0.165111	3.60779	4.08062	0.376627	1
FBgn0002441	l(3)mbt	10.3238	0.123575	0.158407	0.435327	1
FBgn0002466	sti	10.6544	0.208475	0.348294	0.549467	1
FBgn0002521	pho	10.1908	-0.0454112	0.790366	NA	NA
FBgn0002522	lab	2.09067	-0.344373	1.18596	0.771529	1
FBgn0002524	lace	9.60295	0.0561612	0.113522	0.620802	1
FBgn0002525	Lam	13.5119	0.123044	0.223066	0.581221	1
FBgn0002526	LanA	12.3348	0.179371	0.34973	0.608031	1
FBgn0002531	Lcp1	7.31907	-0.516227	1.41246	0.714752	1
FBgn0002533	Lcp2	5.92506	0.893892	0.940655	0.341967	1
FBgn0002534	Lcp3	4.97161	1.76862	1.90665	0.353611	1
FBgn0002535	Lcp4	7.11714	1.01126	1.40853	0.472783	1
FBgn0002542	lds	10.4215	0.0937973	0.30194	0.756068	1
FBgn0002543	robo2	12.607	0.268131	0.295851	0.364775	1
FBgn0002552	lin	10.3607	0.0858701	0.166533	0.60611	1
FBgn0002561	l(1)sc	0.489257	-0.226026	1.17938	0.848018	1
FBgn0002562	Lsp1alpha	12.1246	-0.428354	1.73591	0.805093	1
FBgn0002563	Lsp1beta	12.6398	-0.408346	1.41803	0.773371	1
FBgn0002564	Lsp1gamma	12.4085	-0.165787	1.63674	0.919319	1
FBgn0002565	Lsp2	12.2479	-0.492337	1.31109	0.707275	1
FBgn0002566	lt	9.90406	-0.0822995	0.822069	NA	NA
FBgn0002567	Rab32	8.1688	-0.0883892	0.280032	0.752276	1
FBgn0002569	Mal-A2	0.3007	0	5.12175	1	1
FBgn0002573	sens	6.25471	-0.25225	0.466884	0.589001	1
FBgn0002576	lz	1.62061	1.48655	1.11072	0.180776	1
FBgn0002577	m	11.1126	1.01075	0.794986	0.203583	1
FBgn0002578	Kaz-m1	-0.580555	0.731164	2.53053	0.772629	1
FBgn0002579	RpL36	14.7502	-0.178977	0.145339	0.218155	1
FBgn0002590	RpS5a	15.5798	-0.150615	0.198369	0.447693	1
FBgn0002592	E(spl)m2-BFM	9.6288	-0.00221797	0.411392	0.995698	1
FBgn0002593	RpLP1	15.4371	-0.184868	0.330577	0.576007	1
FBgn0002609	E(spl)m3-HLH	9.74452	-0.222979	0.147614	0.130901	1
FBgn0002622	RpS3	15.3416	-0.122176	0.210949	0.562472	1
FBgn0002626	RpL32	14.8756	-0.125323	0.280985	0.655588	1
FBgn0002629	E(spl)m4-BFM	8.05358	-0.289966	0.214607	0.176649	1
FBgn0002631	E(spl)m5-HLH	3.52943	-0.0279525	0.423454	0.947369	1
FBgn0002632	E(spl)m6-BFM	7.23778	-0.333467	0.662526	0.614734	1
FBgn0002633	E(spl)m7-HLH	8.99438	-0.319698	0.273946	0.243206	1
FBgn0002638	Rcc1	11.0973	0.129792	0.202874	0.522325	1
FBgn0002641	mal	8.66394	-0.0178899	0.176089	0.919077	1
FBgn0002643	mam	12.5278	0.122776	0.360373	0.733335	1
FBgn0002645	Map205	12.2799	0.0452582	0.245316	0.85363	1
FBgn0002673	twe	5.93093	-0.0120995	0.30117	0.967954	1
FBgn0002707	mei-9	8.77526	0.12151	0.194038	0.531172	1
FBgn0002709	mei-218	4.82681	-0.322487	0.268778	0.230206	1
FBgn0002715	mei-S332	7.97826	0.0389587	0.16017	0.807824	1
FBgn0002716	mei-W68	3.36953	-0.805734	0.572727	0.159475	1
FBgn0002719	Men	10.2455	0.163252	0.233697	0.484826	1
FBgn0002723	Met	8.6996	-0.026154	0.240288	0.913326	1
FBgn0002732	E(spl)malpha-BFM	10.3077	-0.261805	0.281672	0.352646	1
FBgn0002733	E(spl)mbeta-HLH	11.3702	-0.151913	0.22811	0.505433	1
FBgn0002734	E(spl)mdelta-HLH	8.35655	-0.351513	0.141257	0.0128298	1
FBgn0002735	E(spl)mgamma-HLH	5.90418	-0.110965	0.1786	0.534399	1
FBgn0002736	mago	10.3373	-0.0246997	0.35233	0.944111	1
FBgn0002772	Mlc1	5.13657	-0.148742	1.06487	0.888912	1
FBgn0002773	Mlc2	6.9856	-0.36866	0.69578	0.596215	1
FBgn0002774	mle	11.2188	0.0572065	0.261182	0.826627	1
FBgn0002775	msl-3	9.06412	0.00161825	0.116851	0.988951	1
FBgn0002778	mnd	9.11977	0.0600998	0.19613	0.759278	1
FBgn0002780	mod	12.5464	-0.0265709	0.736769	0.971231	1
FBgn0002781	mod(mdg4)	13.2347	0.0994694	0.247939	0.688284	1
FBgn0002783	mor	12.5508	0.239082	0.121978	0.0499915	1
FBgn0002787	Rpn8	11.5013	0.0508397	0.156241	0.744883	1
FBgn0002789	Mp20	4.31771	0.177365	0.978432	0.856152	1
FBgn0002791	mr	9.44752	0.00320919	0.453845	0.994358	1
FBgn0002838	ms(3)K81	-0.700574	-2.38088	2.72231	0.381803	1
FBgn0002862	Mst87F	0.222351	1.64629	1.29405	0.203301	1
FBgn0002863	Acp95EF	1.98453	0.651143	1.19869	0.586984	1
FBgn0002868	MtnA	6.35068	-1.5654	0.937559	0.0949881	1
FBgn0002869	MtnB	6.71781	-17.9897	2.69632	NA	NA
FBgn0002872	mu2	9.3109	0.168651	0.339337	0.619188	1
FBgn0002873	mud	10.164	0.174533	0.232178	0.452217	1
FBgn0002878	mus101	8.70763	0.228354	0.171169	0.182177	1
FBgn0002887	mus201	8.41714	0.114384	0.196781	0.561054	1
FBgn0002891	DNApol-zeta	7.63889	0.115437	0.277496	0.677413	1
FBgn0002899	mus301	7.98611	0.137521	0.25086	0.583554	1
FBgn0002901	mus304	7.76572	0.045578	0.366854	0.901125	1
FBgn0002905	DNApol-theta	8.70796	0.139611	0.166963	0.403055	1
FBgn0002906	Blm	9.32616	0.366173	0.364907	0.315634	1
FBgn0002917	na	5.78345	0.385681	1.02261	0.706058	1
FBgn0002921	Atpalpha	13.6786	0.100868	0.119921	0.400281	1
FBgn0002922	nau	3.33628	0.214393	0.485375	0.658703	1
FBgn0002924	ncd	10.4433	0.0303623	0.187569	0.871406	1
FBgn0002930	nec	7.76742	-1.22579	0.733238	0.0945741	1
FBgn0002931	net	8.16462	-0.173521	0.165922	0.295654	1
FBgn0002932	neur	9.58633	0.0741005	0.217524	0.733364	1
FBgn0002936	ninaA	0.383144	-2.96288	1.78675	0.097266	1
FBgn0002938	ninaC	4.77894	-0.112359	0.496666	0.821026	1
FBgn0002939	ninaD	2.50796	-1.78869	1.67488	0.285541	1
FBgn0002941	slou	0.371255	-0.294754	1.40364	0.833673	1
FBgn0002945	nkd	12.143	0.111686	0.296992	0.706875	1
FBgn0002948	nod	8.95017	0.0334996	0.199383	0.86657	1
FBgn0002962	nos	2.29879	-0.176711	0.736203	0.810306	1
FBgn0002973	numb	12.6111	0.0298799	0.240744	0.901224	1
FBgn0002985	odd	7.13659	-0.309754	0.426769	0.467954	1
FBgn0002989	okr	7.8972	0.147208	0.186933	0.430994	1
FBgn0003002	opa	9.00225	-0.0365522	0.308199	0.905593	1
FBgn0003008	or	8.82857	-0.162368	0.520958	0.75529	1
FBgn0003016	osp	11.0743	0.346963	0.206609	0.0930889	1
FBgn0003023	otu	1.77263	-0.268792	1.15814	0.816468	1
FBgn0003028	ovo	12.7015	0.0401283	0.230532	0.861812	1
FBgn0003041	pbl	10.1517	0.0943206	0.249053	0.704898	1
FBgn0003042	Pc	8.73914	0.0469956	0.25229	0.852229	1
FBgn0003044	Pcl	10.8539	0.185462	0.124123	0.135129	1
FBgn0003046	Pcp	3.24221	-0.49275	0.944864	0.602016	1
FBgn0003048	pcx	10.9137	0.149443	0.236281	0.527073	1
FBgn0003053	peb	7.79617	0.162146	0.310585	0.601625	1
FBgn0003060	CG9757	1.86775	4.34799	2.5712	0.0908302	1
FBgn0003062	Fib	11.6923	-0.0789478	0.301881	0.793692	1
FBgn0003065	CG2150	7.87585	-1.03225	0.692636	0.136141	1
FBgn0003068	per	3.95515	0.269418	0.863593	0.75506	1
FBgn0003071	Pfk	11.0577	0.00652739	0.0987467	0.947296	1
FBgn0003074	Pgi	10.9128	0.0182599	0.115263	0.874126	1
FBgn0003076	Pgm1	8.71722	-0.149558	0.282139	0.596052	1
FBgn0003079	Raf	9.96824	0.0394664	0.235634	0.866984	1
FBgn0003082	phr	7.70937	0.2162	0.217366	0.319912	1
FBgn0003087	pim	8.77677	-0.097201	0.926423	0.916439	1
FBgn0003089	pip	9.37414	-0.134057	0.557978	0.810133	1
FBgn0003090	pk	12.2393	0.0692714	0.30039	0.817622	1
FBgn0003091	Pkc53E	3.88457	0.416127	0.913434	0.648704	1
FBgn0003093	Pkc98E	11.1077	0.114792	0.161979	0.478519	1
FBgn0003116	pn	6.65173	0.00273045	0.215435	0.989888	1
FBgn0003117	pnr	8.73303	-0.085517	0.262558	0.744646	1
FBgn0003118	pnt	9.86779	-0.0902719	0.162014	0.577401	1
FBgn0003124	polo	11.8751	0.0699334	0.312536	0.822943	1
FBgn0003129	Poxm	2.08733	-0.851573	1.05356	0.418927	1
FBgn0003130	Poxn	8.03113	-0.0696149	0.116548	0.550301	1
FBgn0003134	Pp1alpha-96A	10.0321	0.0697384	0.0787958	0.376129	1
FBgn0003137	Ppn	12.516	0.28006	0.256577	0.275043	1
FBgn0003139	PpV	9.97819	-0.00938461	0.126421	0.940825	1
FBgn0003141	pr	9.39484	0.0300507	0.663122	0.963855	1
FBgn0003149	Prm	5.4826	0.578976	0.854468	0.498034	1
FBgn0003159	CG2841	9.9351	-0.087774	0.163319	0.590965	1
FBgn0003162	Pu	9.0343	-0.506788	0.303105	0.094527	1
FBgn0003165	pum	12.8676	0.1588	0.314824	0.613973	1
FBgn0003169	put	11.4263	0.0542261	0.170446	0.750377	1
FBgn0003174	pwn	12.1092	0.145155	0.25363	0.567114	1
FBgn0003175	px	10.8599	0.27904	0.295545	0.345091	1
FBgn0003187	qua	8.87564	0.791457	0.935906	0.397743	1
FBgn0003189	r	11.4291	0.158611	0.184866	0.390902	1
FBgn0003204	ras	11.3537	0.0578057	0.185948	0.755899	1
FBgn0003205	Ras85D	11.9568	-0.00614714	0.205132	0.976094	1
FBgn0003206	Ras64B	10.9043	-0.0800652	0.146011	0.583451	1
FBgn0003209	raw	10.05	0.0703466	0.14777	0.634037	1
FBgn0003210	rb	10.9946	0.110213	0.173073	0.524254	1
FBgn0003218	rdgB	9.62168	0.237954	0.263772	0.366993	1
FBgn0003227	rec	7.8134	0.0753466	0.153679	0.623932	1
FBgn0003231	ref(2)P	11.1837	0.0645655	0.0832215	0.437851	1
FBgn0003250	Rh4	0.0303909	0.589524	1.37843	0.668885	1
FBgn0003254	rib	3.53178	0	1.49404	1	1
FBgn0003255	rk	4.99309	0.0190354	0.626177	0.975749	1
FBgn0003256	rl	9.21146	0.0502703	1.00714	NA	NA
FBgn0003257	r-l	9.85697	0.112183	0.234003	0.63165	1
FBgn0003261	Rm62	15.2724	-0.0847231	0.25806	0.742679	1
FBgn0003268	rod	10.1415	0.252112	0.263035	0.337824	1
FBgn0003270	amos	-0.845214	0	4.55927	1	1
FBgn0003274	RpLP2	15.4974	-0.143269	0.361132	0.691573	1
FBgn0003275	RpII18	10.4281	-0.0993699	0.239532	0.678252	1
FBgn0003277	RpII215	12.2009	0.180681	0.159623	0.257668	1
FBgn0003278	RpI135	9.29952	0.0087921	0.528585	0.986729	1
FBgn0003279	RpL4	16.1727	-0.0537529	0.326454	0.869214	1
FBgn0003285	rst	10.4898	-0.243074	0.145397	0.0945648	1
FBgn0003292	rt	10.2622	0.318663	0.311712	0.30664	1
FBgn0003295	ru	6.17079	0.225064	0.474581	0.635331	1
FBgn0003300	run	0.828631	-2.21439	2.56554	0.388066	1
FBgn0003301	rut	11.091	0.0651636	0.236032	0.782487	1
FBgn0003302	rux	8.50885	-0.0193703	0.241233	0.936001	1
FBgn0003308	ry	4.41622	-1.16141	0.701854	0.0979696	1
FBgn0003310	S	11.0052	0.108669	0.252151	0.666493	1
FBgn0003312	sad	5.61989	-0.284174	0.427807	0.506527	1
FBgn0003317	sax	10.4663	-0.0292864	0.1085	0.787222	1
FBgn0003319	Sb	11.4429	0.18464	0.460583	0.688505	1
FBgn0003321	sbr	10.7742	-0.075556	0.129604	0.559909	1
FBgn0003326	sca	9.31407	-0.0646125	0.201395	0.748343	1
FBgn0003330	Sce	9.93138	0.0161015	0.27165	0.952735	1
FBgn0003334	Scm	10.3981	0.17338	0.176153	0.324989	1
FBgn0003339	Scr	5.9381	-0.484228	1.08381	0.655032	1
FBgn0003345	sd	12.5322	0.176422	0.283651	0.533963	1
FBgn0003346	RanGAP	10.9971	0.0883899	0.234226	0.705898	1
FBgn0003353	sei	8.68252	-0.0209093	0.332846	0.94991	1
FBgn0003356	Jon99Cii	1.94248	-0.393194	2.42243	0.871059	1
FBgn0003357	Jon99Ciii	2.11106	0.232602	2.1051	0.912017	1
FBgn0003360	sesB	13.9973	0.0305926	0.168982	0.856336	1
FBgn0003366	sev	6.47919	0.195308	0.79409	0.80572	1
FBgn0003371	sgg	11.8483	0.290141	0.252745	0.250985	1
FBgn0003372	Sgs1	-0.161334	-1.88667	5.06164	0.709344	1
FBgn0003373	Sgs3	3.38193	0.595395	1.49305	0.690058	1
FBgn0003374	Sgs4	1.53816	0.23505	1.62916	0.885282	1
FBgn0003375	Sgs5	1.60961	-0.0384053	1.81615	0.983129	1
FBgn0003377	Sgs7	2.65831	0.151388	1.35346	0.910941	1
FBgn0003378	Sgs8	1.63763	-0.387531	1.20275	0.747297	1
FBgn0003380	Sh	3.74671	-0.778055	1.03279	0.45124	1
FBgn0003382	sha	10.9797	0.700239	0.574853	0.223179	1
FBgn0003386	Shaw	3.75987	0.0547969	1.22154	0.96422	1
FBgn0003388	shd	7.59774	-0.0873768	0.436502	0.841344	1
FBgn0003390	shf	12.4653	-0.0340036	0.123645	0.783309	1
FBgn0003391	shg	13.4142	0.165927	0.17236	0.335711	1
FBgn0003392	shi	11.3149	0.125172	0.0979861	0.201444	1
FBgn0003396	shn	10.9689	0.158136	0.24403	0.516973	1
FBgn0003401	shu	6.9218	0.11055	0.265663	0.677317	1
FBgn0003410	sina	10.8232	0.0807502	0.232135	0.727946	1
FBgn0003411	sisA	-0.647494	3.79733	5.11324	0.457695	1
FBgn0003415	skd	11.7387	0.167653	0.21804	0.441945	1
FBgn0003416	sl	9.25858	0.106691	0.264327	0.686482	1
FBgn0003423	slgA	10.337	0.0823029	0.163927	0.615618	1
FBgn0003429	slo	3.04369	-1.98295	1.27003	0.118444	1
FBgn0003430	slp1	5.00022	1.655	1.061	0.118795	1
FBgn0003435	sm	9.60278	1.22591	0.910777	0.178302	1
FBgn0003444	smo	10.4047	0.0240898	0.369665	0.948041	1
FBgn0003447	sn	12.8977	0.0727739	0.296693	0.806237	1
FBgn0003448	sna	1.1432	0.492417	1.41119	0.727135	1
FBgn0003449	snf	10.645	-0.0935554	0.212461	0.65969	1
FBgn0003450	snk	-0.917055	0	4.54715	1	1
FBgn0003459	stwl	8.93838	0.0777255	0.232429	0.738074	1
FBgn0003460	so	7.4105	0.0792669	0.429015	0.853413	1
FBgn0003462	Sod1	12.4709	-0.106189	0.304973	0.727696	1
FBgn0003463	sog	12.0892	0.248352	0.282543	0.379407	1
FBgn0003464	sol	11.6736	0.11127	0.28693	0.698167	1
FBgn0003475	spir	11.3814	0.223657	0.297582	0.452303	1
FBgn0003479	spn-A	8.46174	-0.0308446	0.173909	0.859225	1
FBgn0003480	spn-B	6.91005	0.652257	0.307676	0.0340107	1
FBgn0003482	spn-D	4.83388	0.039501	0.303694	0.896512	1
FBgn0003483	spn-E	5.03318	0.244831	0.385784	0.525668	1
FBgn0003486	spo	0.955084	2.4996	1.77331	0.158667	1
FBgn0003495	spz	7.33315	0.0221426	0.430346	0.958965	1
FBgn0003499	sr	8.26157	-0.142987	0.412259	0.728713	1
FBgn0003502	Btk29A	11.5929	-0.00151824	0.112821	0.989263	1
FBgn0003507	srp	8.95828	0.0467652	0.474471	0.921485	1
FBgn0003512	Sry-delta	10.1263	0.0484329	0.261315	0.85296	1
FBgn0003513	ss	9.03043	0.123659	0.288186	0.667855	1
FBgn0003514	sqh	12.045	-0.0375741	0.10878	0.729783	1
FBgn0003515	st	4.4802	0.762849	0.497957	0.125533	1
FBgn0003517	sta	16.0333	-0.126912	0.296977	0.669127	1
FBgn0003520	stau	11.2966	0.0620459	0.129791	0.632618	1
FBgn0003525	stg	13.0693	0.172486	0.300535	0.566015	1
FBgn0003545	sub	8.89277	0.196746	0.421191	0.640415	1
FBgn0003557	Su(dx)	10.6706	0.0388548	0.167242	0.816284	1
FBgn0003559	su(f)	10.6082	4.30072e-05	0.154138	0.999777	1
FBgn0003567	su(Hw)	11.1936	0.160249	0.167384	0.338377	1
FBgn0003575	su(sable)	11.171	0.0887881	0.153201	0.562216	1
FBgn0003598	Su(var)3-7	10.9641	0.149386	0.249147	0.548781	1
FBgn0003607	Su(var)205	12.4512	-0.00725975	0.245169	0.976377	1
FBgn0003612	Su(var)2-10	11.5376	0.067404	0.242282	0.780855	1
FBgn0003638	su(w[a])	12.5348	0.0420563	0.18852	0.823467	1
FBgn0003651	svp	8.73126	-0.0486625	0.39521	0.902004	1
FBgn0003654	sw	9.79864	0.138108	0.221068	0.532147	1
FBgn0003655	swa	-0.756026	-1.39142	4.61152	0.76286	1
FBgn0003656	sws	10.3543	0.138803	0.138591	0.316571	1
FBgn0003660	Syb	11.9157	-0.0368414	0.0906998	0.684603	1
FBgn0003676	CCT1	12.4838	0.0830756	0.125064	0.506521	1
FBgn0003687	Tbp	9.20084	-0.0498296	0.150537	0.740635	1
FBgn0003701	thr	8.26794	0.0343788	0.617118	0.955574	1
FBgn0003710	tipE	5.29487	0.0487081	0.887747	0.956244	1
FBgn0003714	tko	9.70827	-0.0179906	0.423746	NA	NA
FBgn0003716	tkv	13.8698	0.0483988	0.209396	0.81721	1
FBgn0003719	tld	9.16305	-0.0272328	0.497486	0.956345	1
FBgn0003721	Tm1	13.1932	0.068834	0.25914	0.790528	1
FBgn0003731	Egfr	13.02	0.0238738	0.163745	0.88408	1
FBgn0003733	tor	-0.193895	-0.426635	2.20295	0.846438	1
FBgn0003741	tra	8.99585	-0.0844904	0.0966077	0.381807	1
FBgn0003742	tra2	9.97518	0.0888907	0.211198	0.673837	1
FBgn0003744	trc	10.8574	0.0200534	0.09529	0.83332	1
FBgn0003747	Gr5a	11.288	0.029306	0.168597	0.862005	1
FBgn0003748	Treh	9.68671	-0.0198597	0.266428	0.94058	1
FBgn0003751	trk	1.08268	0.922912	1.1293	0.413789	1
FBgn0003862	trx	11.9593	0.071834	0.310485	0.817035	1
FBgn0003863	alphaTry	0.111411	-2.40945	3.52667	0.494476	1
FBgn0003865	tsg	-1.19142	-0.663147	3.88017	0.864297	1
FBgn0003866	tsh	11.6378	0.00927875	0.179319	0.958732	1
FBgn0003867	tsl	10.3333	-0.0528718	0.222696	0.812334	1
FBgn0003870	ttk	12.9742	0.0137259	0.212621	0.948528	1
FBgn0003882	tub	10.1436	0.0200057	0.342886	0.953474	1
FBgn0003884	alphaTub84B	16.1145	0.0284003	0.180128	0.874719	1
FBgn0003885	alphaTub84D	11.7172	0.048378	0.138785	0.727403	1
FBgn0003886	alphaTub85E	8.2969	-0.649553	0.473074	0.169737	1
FBgn0003888	betaTub60D	13.1221	0.0806662	0.412438	0.844936	1
FBgn0003890	betaTub97EF	9.40495	-0.0300476	0.448809	0.946622	1
FBgn0003891	tud	12.6154	0.0189729	0.312361	0.951566	1
FBgn0003892	ptc	11.1549	0.191362	0.204947	0.350451	1
FBgn0003896	tup	8.03378	-0.0668564	0.578948	0.908065	1
FBgn0003900	twi	8.41135	-0.106191	0.540075	0.844123	1
FBgn0003922	snRNA:U2:38ABa	-0.239961	-1.96994	1.97061	0.317476	1
FBgn0003930	snRNA:U4:39B	0.39934	1.0257	1.60212	0.522035	1
FBgn0003941	RpL40	14.6055	-0.158099	0.13869	0.254309	1
FBgn0003942	RpS27A	15.3234	-0.216801	0.207376	0.295815	1
FBgn0003943	Ubi-p63E	12.3967	0.0864144	0.467651	0.853399	1
FBgn0003944	Ubx	6.71981	-0.547998	0.599931	0.361014	1
FBgn0003950	unc	5.3703	0.55553	0.305618	0.069106	1
FBgn0003963	ush	10.2118	0.160837	0.29996	0.591824	1
FBgn0003964	usp	10.7073	-0.0173539	0.197767	0.930076	1
FBgn0003965	v	2.6513	-0.496145	2.1795	0.819925	1
FBgn0003969	vap	11.0281	-0.0145718	0.283024	0.958938	1
FBgn0003975	vg	12.0614	0.0968154	0.281181	0.730608	1
FBgn0003977	vir	10.8291	0.177093	0.215899	0.412068	1
FBgn0003978	vls	8.70033	-0.00818863	0.192086	0.965997	1
FBgn0003979	Vm26Aa	-1.28858	0	3.73615	1	1
FBgn0003984	vn	9.79155	0.0797233	0.115318	0.489356	1
FBgn0003996	w	5.53803	-0.742661	0.542162	0.170745	1
FBgn0003997	hid	10.832	-0.167138	0.305051	0.58376	1
FBgn0004003	wbl	11.4575	-0.0673514	0.481105	0.888666	1
FBgn0004034	y	0.288555	1.85929	1.45212	0.200405	1
FBgn0004045	Yp1	-0.803978	1.96637	3.8149	0.606243	1
FBgn0004047	Yp3	8.05273	1.94128	1.33529	NA	NA
FBgn0004049	yrt	11.6305	0.156704	0.178981	0.381283	1
FBgn0004050	z	10.8352	0.150032	0.205788	0.465966	1
FBgn0004055	uzip	9.94777	0.00940489	0.170991	0.956137	1
FBgn0004057	Zw	8.85058	-0.0540091	0.175936	0.758858	1
FBgn0004066	Prosalpha4	11.7162	0.00433411	0.212245	0.983708	1
FBgn0004087	Dhfr	9.02312	-0.128852	0.28874	0.655414	1
FBgn0004101	bs	12.6681	0.0212699	0.364922	0.953521	1
FBgn0004102	oc	0.271267	1.03687	1.74883	0.553253	1
FBgn0004103	Pp1-87B	13.1424	0.0339493	0.10514	0.746774	1
FBgn0004106	Cdk1	10.7312	-0.0489543	0.674843	0.942171	1
FBgn0004107	Cdk2	9.55955	0.101638	0.364073	0.780116	1
FBgn0004108	Nrt	12.5854	0.0373567	0.328276	0.909399	1
FBgn0004110	tin	1.21814	-0.231919	1.41195	0.869531	1
FBgn0004117	Tm2	5.51883	-0.212463	0.943404	0.821817	1
FBgn0004118	nAChRbeta2	3.58962	-0.0348602	0.467391	0.940545	1
FBgn0004132	boca	10.7327	-0.0744292	0.152408	0.625299	1
FBgn0004133	blow	11.1958	0.110654	0.174745	0.526584	1
FBgn0004167	kst	12.7183	0.237808	0.328407	0.468988	1
FBgn0004168	5-HT1A	2.60321	-0.335155	1.28556	0.794317	1
FBgn0004169	up	6.31016	-0.287669	0.788651	0.71529	1
FBgn0004170	sc	8.54332	-0.179364	0.837705	0.830458	1
FBgn0004177	mts	13.359	0.0319416	0.110428	0.772387	1
FBgn0004179	Csp	11.2795	0.066834	0.223898	0.76532	1
FBgn0004192	snRNA:U2:34ABb	-0.790542	0.407821	3.13422	0.896472	1
FBgn0004197	Ser	12.3838	0.159577	0.220458	0.469161	1
FBgn0004198	ct	10.0071	0.0336722	0.301298	0.911016	1
FBgn0004227	nonA	12.1894	0.0444414	0.135607	0.743122	1
FBgn0004228	mex1	-1.17117	0.675697	2.35262	0.773951	1
FBgn0004237	Hrb87F	13.0225	0.0419106	0.141973	0.767841	1
FBgn0004240	DptA	1.37396	2.13117	1.63481	0.192364	1
FBgn0004242	Syt1	6.53921	-0.325212	0.783154	0.677953	1
FBgn0004244	Rdl	3.7731	-3.71644	1.36016	0.0062885	1
FBgn0004359	T48	10.5762	-0.127846	0.213878	0.550007	1
FBgn0004360	Wnt2	11.166	-0.0724167	0.4123	0.860576	1
FBgn0004362	HmgD	14.1305	-0.00907027	0.18006	0.959825	1
FBgn0004363	porin	13.5002	0.0394747	0.11661	0.734973	1
FBgn0004364	18w	12.7747	0.102113	0.217742	0.639098	1
FBgn0004367	mei-41	8.40058	0.234362	0.257588	0.36291	1
FBgn0004368	Ptp4E	10.6287	0.126766	0.272765	0.642116	1
FBgn0004369	Ptp99A	10.6723	0.145079	0.153265	0.343848	1
FBgn0004370	Ptp10D	11.4217	0.180618	0.213445	0.397437	1
FBgn0004373	fwd	11.2624	0.151926	0.172108	0.377378	1
FBgn0004374	neb	8.51468	0.254273	0.202269	0.208716	1
FBgn0004378	Klp61F	10.3771	0.139764	0.344984	0.685381	1
FBgn0004379	Klp67A	9.74281	0.0704639	0.196472	0.719859	1
FBgn0004380	Klp64D	8.7279	-0.0964036	0.297413	0.745831	1
FBgn0004381	Klp68D	7.69307	0.05843	0.141892	0.680491	1
FBgn0004387	Klp98A	10.8779	0.0975306	0.219615	0.656971	1
FBgn0004390	RasGAP1	11.1758	0.16644	0.197451	0.39926	1
FBgn0004391	shtd	10.013	0.201373	0.181788	0.267976	1
FBgn0004394	pdm2	10.9968	0.0308724	0.237891	0.896744	1
FBgn0004395	unk	10.4629	0.0202953	0.0820838	0.804714	1
FBgn0004396	CrebA	11.0475	0.11651	0.373215	0.754903	1
FBgn0004397	Vinc	11.6586	0.0711704	0.271562	0.793261	1
FBgn0004400	rhi	0.728513	0.46069	1.29325	0.721672	1
FBgn0004401	Pep	13.9224	0.0883574	0.254088	0.728033	1
FBgn0004403	RpS14a	14.5257	-0.175264	0.36118	0.627496	1
FBgn0004404	RpS14b	12.9569	-0.250062	0.276862	0.366419	1
FBgn0004406	tam	8.19752	0.155868	0.501555	0.755976	1
FBgn0004419	me31B	11.8206	0.00868119	0.778231	0.9911	1
FBgn0004425	LysB	1.64932	1.44701	1.51703	0.340162	1
FBgn0004426	LysC	0.247685	-1.046	2.76058	0.704758	1
FBgn0004427	LysD	2.91372	-0.689691	1.39696	0.621512	1
FBgn0004428	LysE	0.818875	-2.30904	3.12565	0.460066	1
FBgn0004429	LysP	0.0786723	4.04238	3.12511	0.195833	1
FBgn0004430	LysS	2.0838	-0.781761	1.25155	0.532209	1
FBgn0004431	LysX	-0.175012	2.76243	2.33176	0.236137	1
FBgn0004432	Cyp1	14.7285	-0.058804	0.283657	0.835771	1
FBgn0004435	Galphaq	8.6239	-0.0786602	0.809115	NA	NA
FBgn0004436	Ubc6	10.9034	-0.0575294	0.334729	0.863541	1
FBgn0004449	Ten-m	13.1235	0.123823	0.192903	0.520943	1
FBgn0004456	mew	11.7813	0.0222941	0.23091	0.923085	1
FBgn0004463	RpIII128	9.42647	0.0802936	0.226054	0.722443	1
FBgn0004465	Su(P)	9.25893	-0.00258853	0.211244	0.990223	1
FBgn0004507	GlyP	10.5535	0.10365	0.398634	0.794853	1
FBgn0004509	Fur1	10.698	0.0736434	0.242149	0.761033	1
FBgn0004510	Ets97D	9.1307	0.0313754	0.134799	0.81595	1
FBgn0004511	dy	5.79749	0.427849	0.603187	0.478129	1
FBgn0004512	Mdr49	11.1859	-0.0779272	0.213044	0.714529	1
FBgn0004513	Mdr65	3.80535	0.282145	0.725551	0.697372	1
FBgn0004514	Oct-TyrR	0.0351341	3.55078	1.76108	0.0437732	1
FBgn0004516	Gad1	-1.02659	0	4.61562	1	1
FBgn0004552	Akh	2.62165	0.388149	0.806572	0.630351	1
FBgn0004554	Edg91	5.48237	-0.528347	0.489245	0.280176	1
FBgn0004556	Dbp73D	8.39168	-0.063193	0.304109	0.835387	1
FBgn0004567	slp2	3.4259	1.35785	1.00833	0.178099	1
FBgn0004569	aos	8.66536	-0.142288	0.197767	0.471848	1
FBgn0004573	5-HT7	1.29168	-1.114	1.06482	0.295475	1
FBgn0004574	Rop	12.2577	0.00906908	0.145688	0.950364	1
FBgn0004575	Syn	5.25086	-0.979733	0.474095	0.0387783	1
FBgn0004577	Pxd	6.78212	-0.46425	0.48762	0.341061	1
FBgn0004580	Cbp53E	1.79504	0.0505998	1.57612	0.974389	1
FBgn0004581	bgcn	3.37168	0.685777	0.420557	0.102967	1
FBgn0004583	ex	12.638	0.139218	0.197873	0.481699	1
FBgn0004584	Rrp1	11.3647	0.0886077	0.216337	0.682113	1
FBgn0004587	B52	13.7104	0.0134559	0.216554	0.950454	1
FBgn0004588	Eig71Ea	-0.976599	2.03141	3.84811	0.59757	1
FBgn0004592	Eig71Ee	1.51562	0.838345	1.70136	0.622189	1
FBgn0004595	pros	8.32035	0.371543	0.639551	0.561278	1
FBgn0004597	CycC	9.13726	-0.0741254	0.335214	0.824992	1
FBgn0004598	Fur2	12.1294	0.11774	0.166711	0.480031	1
FBgn0004606	zfh1	9.95226	0.180153	0.355478	0.6123	1
FBgn0004607	zfh2	11.8779	0.178802	0.445017	0.687841	1
FBgn0004611	Plc21C	9.96767	-0.0313043	0.150618	0.835354	1
FBgn0004618	gl	0.809828	0.0503479	1.46823	0.972645	1
FBgn0004619	GluRIA	-0.965626	-0.353978	2.2548	0.875254	1
FBgn0004620	GluRIIA	1.37947	-1.73579	1.50696	0.249384	1
FBgn0004622	TkR99D	-0.0259103	1.8304	2.05687	0.373522	1
FBgn0004623	Gbeta76C	-0.930145	1.43748	2.86341	0.615656	1
FBgn0004629	Cys	6.81055	-0.816428	0.646599	0.206715	1
FBgn0004635	rho	8.91795	-0.17813	0.352737	0.613563	1
FBgn0004636	Rap1	11.7531	0.0879514	0.131499	0.503599	1
FBgn0004638	drk	11.2582	-0.0288327	0.285169	0.919465	1
FBgn0004643	Zw10	10.4092	0.156335	0.183313	0.393751	1
FBgn0004644	hh	11.0177	-0.0660892	0.274211	0.809543	1
FBgn0004646	ogre	13.6502	0.0290076	0.230758	0.899965	1
FBgn0004647	N	13.8932	0.189789	0.181441	0.295557	1
FBgn0004648	svr	11.3216	0.0463661	0.274263	0.865752	1
FBgn0004650	fs(1)N	2.95767	0.727949	0.938605	0.438006	1
FBgn0004652	fru	12.3183	0.545689	0.587647	0.353096	1
FBgn0004654	Pgd	10.8018	0.0444373	0.244527	0.855797	1
FBgn0004655	wapl	10.852	0.224036	0.240681	0.351934	1
FBgn0004656	fs(1)h	12.7636	0.181444	0.250879	0.469536	1
FBgn0004657	mys	12.2866	0.0834547	0.130708	0.523159	1
FBgn0004687	Mlc-c	11.8857	0.0163224	0.298504	0.956393	1
FBgn0004698	Xpc	10.8862	0.0381368	0.340067	0.910708	1
FBgn0004777	Ccp84Ag	0.149618	2.99265	3.1904	0.348237	1
FBgn0004780	Ccp84Ad	0.192956	0	2.88011	1	1
FBgn0004782	Ccp84Ab	-1.42465	-0.304371	3.1597	0.923259	1
FBgn0004783	Ccp84Aa	0.746449	-0.054485	2.14266	0.979713	1
FBgn0004784	inaC	-0.79546	0	5.20164	1	1
FBgn0004795	retn	0.876428	-1.944	1.71014	0.255643	1
FBgn0004797	mdy	8.95928	0.0220084	0.939493	0.981311	1
FBgn0004811	fs(2)ltoPP43	10.1192	-0.0243217	0.237497	0.918433	1
FBgn0004828	His3.3B	14.5213	-0.0545084	0.262902	0.835749	1
FBgn0004832	Xpac	9.09334	0.0449373	0.272841	0.869179	1
FBgn0004837	Su(H)	9.83387	0.101506	0.0953117	0.28688	1
FBgn0004838	Hrb27C	14.3341	0.113123	0.270591	0.675904	1
FBgn0004839	otk	11.0253	-0.033554	0.203463	0.869012	1
FBgn0004841	TkR86C	1.03772	-0.770889	1.15906	0.505988	1
FBgn0004852	Ac76E	5.10826	-0.164624	0.356321	0.644074	1
FBgn0004854	B-H2	6.60315	-0.144896	0.522679	0.781613	1
FBgn0004855	RpII15	9.67491	0.00195009	0.277721	0.994397	1
FBgn0004856	Bx42	10.8732	0.104531	0.305903	0.732567	1
FBgn0004858	elB	10.602	0.00317923	0.247137	0.989736	1
FBgn0004859	ci	11.9343	0.0491855	0.673955	0.941822	1
FBgn0004860	ph-d	10.4064	0.136328	0.103065	0.185923	1
FBgn0004861	ph-p	10.9958	0.103276	0.125173	0.409334	1
FBgn0004862	bap	-2.31462e-05	0	5.20164	1	1
FBgn0004863	C15	7.03835	-0.000247601	0.53074	0.999628	1
FBgn0004864	hop	10.5417	0.187355	0.147509	0.204039	1
FBgn0004865	Eip78C	12.633	0.0646882	0.582187	0.911527	1
FBgn0004867	RpS2	15.4642	-0.108398	0.322464	0.736752	1
FBgn0004868	Gdi	13.1568	-0.0121186	0.185485	0.947908	1
FBgn0004870	bab1	5.66633	-0.132607	0.344187	0.700033	1
FBgn0004872	piwi	3.37846	0.0215989	0.446897	0.961453	1
FBgn0004875	enc	11.2766	0.192575	0.242673	0.427454	1
FBgn0004876	cdi	11.2334	0.0931295	0.146721	0.5256	1
FBgn0004878	cas	1.53239	-0.821735	0.959836	0.391932	1
FBgn0004880	scrt	4.78758	-0.684155	0.844276	0.417742	1
FBgn0004882	orb	2.37007	-0.336787	0.694536	0.627741	1
FBgn0004885	tok	12.2698	-0.0237218	0.145493	0.870483	1
FBgn0004888	Scsalpha1	11.7962	-0.0541249	0.303128	0.858288	1
FBgn0004889	tws	11.641	0.0776945	0.153248	0.612165	1
FBgn0004892	sob	9.07568	0.0308963	0.346677	0.928985	1
FBgn0004893	bowl	13.2882	-0.0160461	0.142315	0.910228	1
FBgn0004895	FoxL1	-1.26938	1.45619	3.17289	0.646272	1
FBgn0004897	fd96Ca	4.0988	-0.499407	1.36767	0.714998	1
FBgn0004898	fd96Cb	5.25549	-0.977713	1.31499	0.457169	1
FBgn0004901	Prat	10.2136	0.0990956	0.169335	0.558411	1
FBgn0004903	Rb97D	10.2525	-0.011669	0.150973	0.938392	1
FBgn0004907	14-3-3zeta	13.7572	-0.0129938	0.354168	0.970734	1
FBgn0004908	Arl2	8.33279	0.00491937	0.257017	0.984729	1
FBgn0004910	Eip63F-1	4.03457	-0.190175	0.521037	0.715117	1
FBgn0004913	Gnf1	10.2331	0.122583	0.185378	0.508446	1
FBgn0004914	Hnf4	9.68798	-0.0114764	0.196704	0.953475	1
FBgn0004915	TfIIB	10.1999	-0.0123875	0.335372	0.970535	1
FBgn0004919	gol	5.30145	-0.622178	0.664681	0.349245	1
FBgn0004921	Ggamma1	12.1421	-0.0419871	0.275296	0.87878	1
FBgn0004924	Top1	12.2505	0.183044	0.154425	0.23589	1
FBgn0004926	eIF2beta	12.3025	-0.0411329	0.152654	0.787582	1
FBgn0004956	upd1	10.1868	0.188954	0.205331	0.357447	1
FBgn0004957	por	9.85566	-0.0270847	0.259422	0.916849	1
FBgn0004959	phm	7.16388	0.0420651	0.405351	0.917348	1
FBgn0005198	gig	10.4291	0.176192	0.153686	0.251613	1
FBgn0005278	Sam-S	12.4616	0.041478	0.252715	0.869629	1
FBgn0005322	nmd	9.5629	-0.0228116	0.567963	0.967963	1
FBgn0005355	Su(fu)	10.5413	0.0273857	0.12541	0.827141	1
FBgn0005386	ash1	10.0083	0.119464	0.39762	0.763836	1
FBgn0005391	Yp2	1.98282	-0.58829	0.676611	0.384593	1
FBgn0005411	U2af50	11.7082	0.0182089	0.266901	0.945608	1
FBgn0005427	ewg	10.7219	0.0162784	0.196904	0.934113	1
FBgn0005533	RpS17	14.861	-0.18955	0.154826	0.220848	1
FBgn0005536	Mbs	11.2838	0.174142	0.122809	0.156192	1
FBgn0005558	ey	4.07543	0.078415	0.523426	0.880914	1
FBgn0005561	sv	5.91302	-0.00781414	1.16669	0.994656	1
FBgn0005564	Shal	4.49294	-0.0900054	0.539433	0.867487	1
FBgn0005585	Calr	14.8752	-0.0540473	0.115789	0.640661	1
FBgn0005586	Rab3	5.02828	0.0371973	0.785027	0.962208	1
FBgn0005593	RpL7	15.5127	-0.0970462	0.168217	0.563999	1
FBgn0005596	yem	9.95046	0.241862	0.143538	0.091987	1
FBgn0005612	Sox14	10.3275	-0.0619311	0.310052	0.841681	1
FBgn0005613	Sox15	10.82	0.152305	0.221789	0.492265	1
FBgn0005616	msl-2	9.18657	0.174379	0.159462	0.274153	1
FBgn0005617	msl-1	9.76996	0.0622418	0.257065	0.808683	1
FBgn0005619	Hdc	2.05766	1.3569	1.19153	0.254794	1
FBgn0005624	Psc	10.7373	0.308814	0.18389	0.0930859	1
FBgn0005626	ple	5.63863	0.661477	0.695159	0.341326	1
FBgn0005631	robo1	11.0971	0.115453	0.227528	0.611859	1
FBgn0005632	faf	12.2478	0.136451	0.203783	0.503119	1
FBgn0005633	fln	-1.38132	1.51353	2.75268	0.582429	1
FBgn0005636	nvy	7.98351	-0.0895712	0.383739	0.815438	1
FBgn0005638	slbo	2.18623	0.545016	1.46282	0.709461	1
FBgn0005640	Eip63E	10.6611	0.0828728	0.122061	0.497173	1
FBgn0005642	wdn	9.98333	0.0192074	0.145861	0.895235	1
FBgn0005648	Pabp2	12.309	-0.0425051	0.235185	0.856579	1
FBgn0005649	Rox8	12.477	0.0775962	0.227289	0.732804	1
FBgn0005655	PCNA	11.1308	0.0970203	0.205144	0.636257	1
FBgn0005658	Ets65A	4.52482	-1.24757	1.33693	0.350738	1
FBgn0005659	Ets98B	8.8519	0.0133458	0.240738	0.95579	1
FBgn0005660	Ets21C	6.56517	-0.0444816	0.368601	0.903947	1
FBgn0005664	Crys	5.14263	0.284004	0.706672	0.687765	1
FBgn0005666	bt	5.93287	-0.0926286	1.00411	0.9265	1
FBgn0005670	Cyp4d1	5.37417	0.520134	1.72613	0.763164	1
FBgn0005671	Vha55	11.5226	-0.0129722	0.0862494	0.880446	1
FBgn0005672	spi	12.1765	0.00376729	0.291985	0.989706	1
FBgn0005674	GluProRS	12.5661	0.164731	0.108278	0.128167	1
FBgn0005677	dac	9.67506	-0.0195771	0.43527	0.964126	1
FBgn0005683	pie	7.28632	0.158793	0.192642	0.409775	1
FBgn0005694	Aef1	10.12	0.0698987	0.134536	0.603373	1
FBgn0005695	gcl	8.59405	0.0169633	0.153012	0.911726	1
FBgn0005696	DNApol-alpha73	7.84167	0.0888619	0.359002	0.804502	1
FBgn0005771	noc	11.6463	0.0175661	0.300033	0.953313	1
FBgn0005775	Con	8.2993	0.261421	0.66264	0.693201	1
FBgn0005777	PpD3	9.94294	0.0802876	0.204146	0.694109	1
FBgn0008635	betaCOP	12.7617	0.176741	0.201955	0.381492	1
FBgn0008646	E5	10.0934	0.0292797	0.313034	0.925478	1
FBgn0008651	lbl	2.35413	-1.08701	1.52115	0.474856	1
FBgn0010014	CanB	3.90347	1.49855	1.46613	0.306726	1
FBgn0010015	CanA1	-0.268974	-2.69051	2.99718	0.369356	1
FBgn0010019	Cyp4g1	2.22182	0.760837	1.21448	0.531006	1
FBgn0010038	GstD2	5.77063	-0.957963	0.694259	0.167637	1
FBgn0010039	GstD3	9.84046	0.0563263	0.808495	0.944458	1
FBgn0010040	GstD4	2.6076	-0.4194	0.962903	0.663158	1
FBgn0010041	GstD5	6.28332	0.30643	0.844222	0.716625	1
FBgn0010042	GstD6	0.406916	-1.71574	2.57161	0.504653	1
FBgn0010043	GstD7	0.599321	2.1814	1.85313	0.239138	1
FBgn0010051	Itpr	11.2881	0.169668	0.182261	0.351902	1
FBgn0010052	Jhe	1.55667	-0.663151	1.73352	0.702056	1
FBgn0010053	Jheh1	7.24792	0.333399	0.57141	0.559579	1
FBgn0010078	RpL23	15.4111	-0.162088	0.353008	0.646118	1
FBgn0010097	gammaTub37C	1.29283	-0.361714	0.963303	0.707293	1
FBgn0010100	mAcon1	12.3901	0.0895161	0.0912548	0.326619	1
FBgn0010105	comm	7.76173	0.202369	0.17997	0.260817	1
FBgn0010109	dpn	8.91277	0.21485	0.360933	0.551668	1
FBgn0010113	hdc	12.2095	0.0385088	0.268015	0.885752	1
FBgn0010114	hig	3.0228	2.31148	1.17898	0.0499282	1
FBgn0010173	RpA-70	11.0132	0.0570652	0.305805	0.851969	1
FBgn0010194	Wnt5	11.6468	0.0125871	0.274165	0.963382	1
FBgn0010197	Gyc32E	2.12564	-0.266741	0.923783	0.772774	1
FBgn0010198	RpS15Aa	14.6362	-0.119074	0.114888	0.299996	1
FBgn0010213	Sod2	10.6909	0.0439571	0.213385	0.836792	1
FBgn0010215	alpha-Cat	11.2076	0.0268228	0.95925	NA	NA
FBgn0010217	ATPsynbeta	13.8495	-0.0405909	0.468827	0.931006	1
FBgn0010220	Dbp45A	8.77886	0.0574155	0.200563	0.77467	1
FBgn0010222	Nmdmc	9.01492	0.0838272	0.317253	0.791604	1
FBgn0010223	Galphaf	2.41378	-0.167392	0.843462	0.842687	1
FBgn0010225	Gel	11.667	-0.306807	0.216058	0.155602	1
FBgn0010226	GstS1	13.0366	-0.083348	0.180406	0.644079	1
FBgn0010228	HmgZ	12.6642	-0.0921737	0.142338	0.517264	1
FBgn0010235	Klc	11.2064	-0.0681274	0.15483	0.659927	1
FBgn0010238	Lac	13.6423	0.0236994	0.15397	0.877671	1
FBgn0010240	Lcch3	4.79772	0.764507	0.433581	0.07786	1
FBgn0010241	Mdr50	1.18862	2.58539	1.09011	0.0177075	1
FBgn0010246	Myo61F	9.81749	0.116315	0.163816	0.477682	1
FBgn0010247	Parp	10.0441	0.112654	0.917863	NA	NA
FBgn0010258	Rbp4	4.55472	-0.254242	0.413995	0.539136	1
FBgn0010263	Rbp9	6.40111	0.390164	0.533096	0.46424	1
FBgn0010265	RpS13	15.2509	-0.155882	0.158191	0.324427	1
FBgn0010269	Dsor1	10.1853	-0.113858	0.126942	0.369758	1
FBgn0010278	Ssrp	11.5796	0.10587	0.16713	0.526435	1
FBgn0010280	Taf4	11.909	0.129014	0.159831	0.419557	1
FBgn0010282	TfIIFalpha	10.8205	0.0642825	0.142734	0.652447	1
FBgn0010287	Trf	8.15267	-0.0621875	0.138025	0.652313	1
FBgn0010288	Uch	11.0157	-0.0760359	0.21191	0.719735	1
FBgn0010292	bys	9.75048	0.0178539	0.172139	0.917393	1
FBgn0010300	brat	12.8588	0.191263	0.118829	0.107492	1
FBgn0010303	hep	10.8586	0.155528	0.243331	0.522717	1
FBgn0010309	pigeon	9.02229	0.0796806	0.133757	0.551368	1
FBgn0010313	corto	11.7894	0.110262	0.285555	0.699398	1
FBgn0010314	Cks30A	9.79045	-0.00801945	0.261312	0.975517	1
FBgn0010315	CycD	10.0007	-0.058565	0.174302	0.736872	1
FBgn0010316	dap	10.0381	0.0848639	0.197613	0.667599	1
FBgn0010317	CycJ	-1.02666	2.05015	2.77432	0.459922	1
FBgn0010328	woc	12.458	0.291964	0.220962	0.186391	1
FBgn0010329	Tbh	0.449423	-1.39664	2.01602	0.488451	1
FBgn0010333	Rac1	11.2325	0.0243539	0.124678	0.845131	1
FBgn0010339	128up	10.637	0.058609	0.075724	0.438942	1
FBgn0010340	140up	7.88913	-0.139481	0.237923	0.557711	1
FBgn0010341	Cdc42	12.4059	0.0664119	0.13165	0.613941	1
FBgn0010342	Map60	11.6261	0.0695068	0.098179	0.47897	1
FBgn0010348	Arf79F	13.4073	0.022723	0.338749	0.946519	1
FBgn0010350	Cds	9.39157	-0.00925343	0.238106	0.969	1
FBgn0010352	Nc73EF	11.1538	0.100629	0.204789	0.623159	1
FBgn0010355	Taf1	11.4553	0.220467	0.205204	0.282654	1
FBgn0010356	Taf5	9.55759	0.0973809	0.15066	0.518044	1
FBgn0010357	betaTry	0.336835	-4.72053	4.90004	0.335364	1
FBgn0010379	Akt1	11.323	0.120446	0.156016	0.440106	1
FBgn0010380	AP-1-2beta	11.9097	0.144891	0.199411	0.467475	1
FBgn0010382	CycE	9.68636	0.115408	0.262026	0.659616	1
FBgn0010383	Cyp18a1	6.10326	0.844814	0.680536	0.21446	1
FBgn0010385	Def	4.46382	-0.673349	0.748739	0.368487	1
FBgn0010387	Acbp2	3.72091	0.543325	2.09749	NA	NA
FBgn0010388	Dro	3.28891	0.34675	0.918003	0.705637	1
FBgn0010389	htl	8.15686	-0.00835534	0.44261	0.984939	1
FBgn0010391	SrpRalpha	11.6733	0.00815794	0.151194	0.956969	1
FBgn0010395	Itgbn	2.49362	-0.436137	0.628222	0.487532	1
FBgn0010397	LamC	9.65149	0.274616	0.412623	0.505707	1
FBgn0010398	Lrr47	7.69412	-0.00187704	0.473872	0.99684	1
FBgn0010399	Nmdar1	3.63194	1.51914	0.986789	0.123688	1
FBgn0010401	Os-C	5.1752	-0.296957	0.366405	0.417676	1
FBgn0010406	RNaseX25	9.71149	-0.0857629	0.306429	0.779571	1
FBgn0010407	Ror	4.06418	0.285383	0.878513	0.745297	1
FBgn0010408	RpS9	15.0509	-0.140996	0.22834	0.536917	1
FBgn0010409	RpL18A	15.173	-0.123395	0.220273	0.57535	1
FBgn0010411	RpS18	14.7508	-0.103827	0.161205	0.519532	1
FBgn0010412	RpS19a	15.1795	-0.144168	0.259139	0.577981	1
FBgn0010414	SerT	4.86955	-0.128739	0.591821	0.827796	1
FBgn0010415	Sdc	12.8101	-0.0154999	0.125525	0.901726	1
FBgn0010416	TH1	10.2703	0.0296007	0.309089	0.923705	1
FBgn0010417	Taf6	10.1553	0.0275853	0.108686	0.799644	1
FBgn0010421	TfIIFbeta	9.32538	0.0171021	0.18289	0.925498	1
FBgn0010422	TfIIS	10.8827	0.0357365	0.117464	0.76095	1
FBgn0010423	TpnC47D	0.719513	-0.236226	1.84656	0.898207	1
FBgn0010424	TpnC73F	5.66479	-0.224429	0.655446	0.732045	1
FBgn0010431	mtrm	0.892513	-0.360405	0.899056	0.688515	1
FBgn0010433	ato	3.02769	0.186093	0.490626	0.704467	1
FBgn0010434	cora	13.392	0.219689	0.132418	0.0971033	1
FBgn0010435	emp	12.0737	-0.164724	0.157812	0.296579	1
FBgn0010438	mtSSB	9.00206	-0.0406518	0.138994	0.769926	1
FBgn0010441	pll	9.72095	-0.0103171	0.122967	0.933135	1
FBgn0010452	trn	11.7074	0.01789	0.155745	0.90855	1
FBgn0010453	Wnt4	9.96617	0.17398	0.509172	0.732583	1
FBgn0010470	Fkbp14	11.6363	0.120253	0.363033	0.740459	1
FBgn0010473	tutl	12.419	0.187101	0.161895	0.247807	1
FBgn0010482	l(2)01289	2.89494	-0.302817	1.04576	0.772149	1
FBgn0010488	NAT1	14.1282	0.0909281	0.184083	0.62134	1
FBgn0010497	dmGlut	8.06016	-0.0822729	0.142083	0.562558	1
FBgn0010501	Dcp-1	10.6908	-0.0162637	0.161147	0.91961	1
FBgn0010504	kermit	9.5831	-0.0273237	0.129973	0.833491	1
FBgn0010516	wal	10.6406	-0.0136648	0.119297	0.908807	1
FBgn0010520	Bka	8.19806	-0.0638474	0.113507	0.573779	1
FBgn0010531	Ccs	8.30213	-0.16066	0.215977	0.456951	1
FBgn0010548	Aldh-III	11.4863	-0.107482	0.107017	0.315214	1
FBgn0010549	l(2)03659	6.5055	0.0933847	0.349419	0.789271	1
FBgn0010551	Phb2	11.9011	-0.00316457	0.0937002	0.973058	1
FBgn0010583	dock	10.2146	0.120194	0.149851	0.422501	1
FBgn0010590	Prosbeta1	11.6749	-0.0612114	0.33972	0.85701	1
FBgn0010591	Sply	9.87556	-0.0243533	0.0995385	0.806718	1
FBgn0010602	lwr	12.7045	-0.0377807	0.272198	0.889609	1
FBgn0010607	l(2)05714	8.6909	-0.0749482	0.464501	0.871816	1
FBgn0010611	Hmgs	9.81063	0.118018	0.120604	0.327802	1
FBgn0010612	ATPsynG	11.7052	-0.101445	0.325271	0.755133	1
FBgn0010620	CG10939	11.8716	-0.00592015	0.194214	0.975682	1
FBgn0010621	CCT5	12.7858	0.116222	0.154495	0.451889	1
FBgn0010622	DCTN3-p24	9.51392	-0.0257654	0.324485	0.936711	1
FBgn0010638	Sec61beta	12.7067	-0.0203482	0.341817	0.95253	1
FBgn0010651	MFS14	9.32533	-0.324039	0.200303	0.105718	1
FBgn0010660	Nup214	11.1625	0.214043	0.180636	0.23604	1
FBgn0010741	Pfdn2	10.9361	-0.0938073	0.337783	0.781232	1
FBgn0010747	Srp54k	11.3648	0.0133301	0.269719	0.960583	1
FBgn0010750	atms	10.3066	0.0116515	0.111905	0.917075	1
FBgn0010762	simj	11.4343	0.0877137	0.240253	0.715045	1
FBgn0010768	sqz	9.12263	0.233393	0.205875	0.256934	1
FBgn0010770	ppan	9.09853	0.0838106	0.168832	0.619603	1
FBgn0010772	Xe7	12.0145	0.0439721	0.103614	0.671285	1
FBgn0010774	Ref1	12.901	0.0189004	0.394636	NA	NA
FBgn0010786	l(3)02640	9.52625	0.026947	0.123162	0.826812	1
FBgn0010803	TrpRS	9.6448	0.0276749	0.236459	0.906829	1
FBgn0010808	Chchd3	10.0474	0.0148332	0.18325	0.935485	1
FBgn0010812	unc-45	9.56349	0.0240908	0.208471	0.908002	1
FBgn0010825	Gug	12.5094	0.218341	0.247435	0.377552	1
FBgn0010830	l(3)04053	9.74755	-0.0296173	0.163313	0.85609	1
FBgn0010877	l(3)05822	10.5601	0.0825122	0.220692	0.708494	1
FBgn0010894	sinu	11.0346	0.0413792	0.120789	0.731919	1
FBgn0010905	Spn	12.1056	0.106392	0.28864	0.712428	1
FBgn0010909	msn	12.9411	0.114319	0.21534	0.595504	1
FBgn0010926	l(3)07882	9.59868	0.127345	0.113447	0.261649	1
FBgn0011016	SsRbeta	12.3349	0.0602559	0.184699	0.744245	1
FBgn0011020	Sas-4	8.9995	0.0722792	0.0998104	0.468965	1
FBgn0011202	dia	10.421	0.0819476	0.148344	0.580664	1
FBgn0011204	cue	9.61045	0.152258	0.17216	0.376481	1
FBgn0011205	fbl	10.0706	-0.0217453	0.347781	0.950144	1
FBgn0011206	bol	5.42559	0.243927	0.441481	0.580593	1
FBgn0011207	pelo	9.90629	0.0570883	0.342118	0.867475	1
FBgn0011211	blw	14.2027	0.0902929	0.248735	0.716599	1
FBgn0011217	eff	13.0676	0.123196	0.34876	0.723908	1
FBgn0011224	heph	14.2138	-0.0269835	0.315806	0.931909	1
FBgn0011225	jar	13.8485	0.179988	0.229516	0.432919	1
FBgn0011227	ox	9.13027	-0.272783	0.181112	0.132026	1
FBgn0011230	poe	12.7584	0.203947	0.350678	0.56085	1
FBgn0011232	scat	9.20223	0.106061	0.234626	0.651237	1
FBgn0011236	ken	9.22534	0.172464	0.372807	0.643644	1
FBgn0011259	Sema1a	10.0896	0.0770737	0.210042	0.71366	1
FBgn0011260	Sema2a	13.3846	0.0380213	0.206561	0.85396	1
FBgn0011272	RpL13	15.2461	-0.0559643	0.395765	0.887548	1
FBgn0011274	Dif	7.46	0.168998	0.305911	0.580645	1
FBgn0011279	Obp69a	2.79605	-1.37049	0.619104	0.026852	1
FBgn0011280	Obp19d	-0.802312	0.840789	3.08819	0.785422	1
FBgn0011282	Obp84a	2.72319	-0.252307	0.599074	0.673637	1
FBgn0011283	Obp28a	-0.964894	0	5.20164	1	1
FBgn0011284	RpS4	15.6467	-0.112663	0.142508	0.429194	1
FBgn0011286	RyR	6.30028	-0.142538	0.50789	0.778981	1
FBgn0011288	Snap25	1.77319	-0.905335	1.53471	0.555253	1
FBgn0011289	TfIIA-L	10.7758	0.0325583	0.107856	0.762753	1
FBgn0011290	Taf12	10.3599	-0.00292368	0.308508	0.992439	1
FBgn0011291	Taf11	9.07106	-0.126102	0.288259	0.661778	1
FBgn0011296	l(2)efl	3.99825	-1.03021	0.731537	0.159049	1
FBgn0011297	Alg3	9.69324	0.0702447	0.198954	0.724037	1
FBgn0011300	babo	12.1521	0.0930142	0.196892	0.636633	1
FBgn0011305	Rsf1	12.0745	-0.0466121	0.34371	0.892126	1
FBgn0011327	Uch-L5	10.8868	0.0100506	0.391736	0.979531	1
FBgn0011335	vers	8.62804	0.0130725	0.308957	0.96625	1
FBgn0011336	Stt3B	11.8751	0.0253797	0.275981	0.926729	1
FBgn0011361	ND-ACP	10.6718	-0.0050355	0.249153	0.983875	1
FBgn0011455	ND-SGDH	10.2652	0.00524401	0.36228	0.988451	1
FBgn0011474	PR-Set7	10.4483	0.177688	0.10704	0.0969131	1
FBgn0011476	l(3)neo43	6.7437	-0.168531	0.502179	0.737172	1
FBgn0011481	Ssdp	11.6903	0.125136	0.364583	0.731425	1
FBgn0011509	SrpRbeta	10.2376	-0.0186085	0.287017	0.948306	1
FBgn0011566	Smyd3	8.66249	0.0694954	0.169181	0.681238	1
FBgn0011569	can	-1.42208	3.09461	4.73314	0.513229	1
FBgn0011570	cpb	11.4713	0.0057447	0.0795019	0.942396	1
FBgn0011573	Cdc37	11.132	0.0105414	0.133199	0.936921	1
FBgn0011576	Cyp4d2	7.03474	-0.0117217	0.363708	0.97429	1
FBgn0011581	Ms	-0.652454	0	5.20164	1	1
FBgn0011582	Dop1R1	0.355867	0	2.39321	1	1
FBgn0011584	Trp1	11.5276	-0.053439	0.34911	0.878341	1
FBgn0011586	e(r)	10.1432	0.0182234	0.303346	0.952096	1
FBgn0011589	Elk	3.15815	0.397825	0.652948	0.542342	1
FBgn0011591	fng	12.684	0.0119228	0.0767917	0.876615	1
FBgn0011592	fra	12.0249	0.22527	0.323356	0.486013	1
FBgn0011596	fzo	-0.835976	-0.652829	2.72294	0.810523	1
FBgn0011603	ine	5.41884	-0.143965	0.444018	0.745763	1
FBgn0011604	Iswi	11.7734	0.0780499	0.3395	0.818172	1
FBgn0011606	Klp3A	11.019	0.155373	0.191392	0.416901	1
FBgn0011638	La	11.6722	0.00662404	0.173463	0.969538	1
FBgn0011640	lark	12.5946	0.121215	0.305713	0.691736	1
FBgn0011642	Zyx	10.4938	-0.0576937	1.20361	NA	NA
FBgn0011648	Mad	11.3488	-0.0129018	0.0845491	0.878717	1
FBgn0011653	mas	12.3462	0.215625	0.115096	0.0610094	1
FBgn0011655	Med	11.3935	0.166909	0.282979	0.555307	1
FBgn0011656	Mef2	10.2345	-0.0169726	0.199858	0.932322	1
FBgn0011659	Mlh1	7.93612	0.163432	0.428592	0.702963	1
FBgn0011660	Pms2	8.52904	0.12962	0.473742	0.784385	1
FBgn0011661	Moe	13.3109	0.0941658	0.247867	0.704017	1
FBgn0011666	msi	10.6595	-0.0218551	0.296128	0.941167	1
FBgn0011672	Mvl	10.0528	0.181407	0.267095	0.497021	1
FBgn0011674	insc	7.8278	-0.0717318	0.400921	0.858002	1
FBgn0011676	Nos	-0.0107228	-1.13127	1.54376	0.463679	1
FBgn0011692	pav	10.7655	0.178762	0.194852	0.35892	1
FBgn0011693	Pdh	3.59076	-2.15893	1.43906	NA	NA
FBgn0011695	EbpIII	8.25954	0.130153	0.525772	0.804485	1
FBgn0011701	repo	7.05427	-1.63614	0.931892	0.079137	1
FBgn0011703	RnrL	10.894	0.0823524	0.403388	0.838235	1
FBgn0011704	RnrS	10.6867	0.0197709	0.260074	0.939403	1
FBgn0011705	rost	7.86357	-0.126066	0.326763	0.699643	1
FBgn0011706	rpr	7.53172	0.298402	0.246161	0.225426	1
FBgn0011708	Syx5	9.92008	0.0274423	0.107017	0.797619	1
FBgn0011710	2024-09-01	11.7248	0.0488681	0.127867	0.702329	1
FBgn0011715	Snr1	10.9126	0.0219202	0.133992	0.870052	1
FBgn0011722	Tig	7.69254	-0.102644	0.582075	0.860026	1
FBgn0011725	twin	11.0327	-0.0784108	0.0764694	0.30518	1
FBgn0011726	tsr	13.6643	-0.120728	0.505356	0.811186	1
FBgn0011737	Wee1	9.62738	0.0519689	0.105156	0.621161	1
FBgn0011739	wts	11.1301	0.0308187	0.220458	0.888823	1
FBgn0011740	alpha-Man-IIa	11.1916	0.129311	0.303786	0.670353	1
FBgn0011741	Arp6	10.3608	-0.0714308	0.0894316	0.424453	1
FBgn0011742	Arp2	11.4378	-0.00108555	0.199475	0.995658	1
FBgn0011745	Arp1	11.4641	0.00197365	0.145737	0.989195	1
FBgn0011746	ana	9.76118	-0.43145	0.451443	0.339218	1
FBgn0011747	Ank	11.8685	0.0580029	0.782329	0.940898	1
FBgn0011754	PhKgamma	10.6491	0.00992437	0.10323	0.92341	1
FBgn0011758	B-H1	6.7442	-0.291863	0.390738	0.455093	1
FBgn0011760	ctp	12.7501	0.0483866	0.440289	0.912491	1
FBgn0011762	DNApol-alpha50	7.52841	0.122461	0.469784	0.794343	1
FBgn0011763	Dp	11.6216	0.1017	0.0899854	0.258398	1
FBgn0011766	E2f1	11.9436	0.120395	0.282602	0.670092	1
FBgn0011768	Fdh	11.6942	0.102371	0.278564	0.713251	1
FBgn0011769	Fdx1	7.14118	-0.117999	0.407734	0.772274	1
FBgn0011770	Gip	9.84772	-0.315515	0.254586	0.215225	1
FBgn0011771	Hem	10.6503	0.138475	0.456811	0.761787	1
FBgn0011774	Irbp	7.76181	0.0701728	0.333432	0.833312	1
FBgn0011785	BRWD3	11.8602	0.178647	0.17764	0.314574	1
FBgn0011787	mRpL12	9.99041	0.0581717	0.364484	0.873196	1
FBgn0011802	Gem3	8.7461	0.0931924	0.661228	0.887919	1
FBgn0011817	nmo	11.3295	-0.00798046	0.234527	0.972855	1
FBgn0011818	oaf	9.24625	0.0442809	0.252638	0.860864	1
FBgn0011824	CG4038	10.8614	-0.051372	0.439271	NA	NA
FBgn0011826	Pp2B-14D	10.6723	0.140811	0.162046	0.38487	1
FBgn0011828	Pxn	10.0243	0.175411	0.270576	0.516799	1
FBgn0011829	Ret	7.45989	0.15808	0.362867	0.663098	1
FBgn0011836	Taf2	9.92271	0.0908079	0.334034	0.785736	1
FBgn0011837	Tis11	10.2803	0.117036	0.301532	0.697915	1
FBgn0011916	tRNA:Met-CAT-1-2	-0.0998016	0	2.07818	1	1
FBgn0012034	AcCoAS	6.79158	-0.0437903	0.522804	0.933247	1
FBgn0012036	Aldh	10.914	0.181026	0.509969	0.722608	1
FBgn0012037	Ance	12.7189	-0.212981	0.365199	0.559765	1
FBgn0012042	AttA	3.4634	-0.371163	1.0635	0.727088	1
FBgn0012051	CalpA	10.256	0.0757197	0.457635	0.868583	1
FBgn0012058	Cdc27	10.5483	0.16533	0.134737	0.219801	1
FBgn0013263	Trl	7.26052	0.0581844	0.548637	0.915541	1
FBgn0013269	Fkbp39	12.2905	0.00398536	0.182548	0.982582	1
FBgn0013272	Gp150	14.2053	-0.0172814	0.251346	0.945184	1
FBgn0013275	Hsp70Aa	3.8364	0.671149	1.28076	0.600263	1
FBgn0013276	Hsp70Ab	4.95386	-0.0474584	1.05134	0.963995	1
FBgn0013277	Hsp70Ba	1.447	1.11762	1.58614	0.481048	1
FBgn0013278	Hsp70Bb	5.70717	0.674806	2.17189	0.756029	1
FBgn0013279	Hsp70Bc	5.73255	1.7138	1.22453	0.161647	1
FBgn0013303	Nca	9.25523	-0.187249	1.06284	0.860154	1
FBgn0013305	Nmda1	10.1002	0.0195677	0.22259	0.929949	1
FBgn0013307	Odc1	3.04462	-0.695302	1.54075	0.651791	1
FBgn0013308	Odc2	0.138983	-0.509907	2.17794	0.814889	1
FBgn0013323	Ptth	2.44737	-0.830484	0.883802	0.347386	1
FBgn0013325	RpL11	14.9778	-0.148688	0.223107	0.505129	1
FBgn0013334	Sap47	10.5934	0.0802206	0.271248	0.767424	1
FBgn0013342	nSyb	6.72785	-0.948284	0.803787	0.238092	1
FBgn0013343	Syx1A	9.29892	0.165543	0.287642	0.564942	1
FBgn0013347	TfIIA-S	10.8663	-0.132289	0.258877	0.609342	1
FBgn0013348	TpnC41C	-0.981032	-0.956907	2.08646	0.646501	1
FBgn0013432	bcn92	8.9905	-0.175248	0.178987	0.327526	1
FBgn0013433	beat-Ia	1.09767	-1.97408	1.64704	0.230697	1
FBgn0013435	Cdc2rk	8.89076	0.0103414	0.152504	0.945936	1
FBgn0013467	igl	4.85725	-1.1545	1.14024	0.311296	1
FBgn0013469	klu	11.1694	-0.0196529	0.301516	0.94803	1
FBgn0013531	MED20	8.37333	0.0355518	0.118064	0.76332	1
FBgn0013548	l(2)dtl	9.04018	0.171128	0.368548	0.642412	1
FBgn0013563	Pex1	8.02789	0.0187692	0.30912	0.951584	1
FBgn0013576	mtd	11.5598	-0.049581	0.193102	0.797363	1
FBgn0013672	NA	13.3192	-0.279888	0.879154	NA	NA
FBgn0013673	NA	1.10955	0.511181	1.78775	0.774928	1
FBgn0013674	NA	15.8107	-0.0316889	0.93105	NA	NA
FBgn0013675	NA	14.0796	-0.185375	0.927322	NA	NA
FBgn0013676	NA	15.3695	-0.0839653	0.929281	NA	NA
FBgn0013678	NA	14.4362	-0.183681	0.927471	NA	NA
FBgn0013679	NA	13.0853	-0.146232	0.91492	NA	NA
FBgn0013680	NA	6.76888	-0.597779	0.911598	NA	NA
FBgn0013681	NA	11.898	-0.335092	1.11069	NA	NA
FBgn0013683	NA	2.35907	-0.337384	0.666696	0.612819	1
FBgn0013684	NA	12.5665	-0.0437846	0.911823	0.961701	1
FBgn0013685	NA	3.8801	-0.0945521	1.0324	0.927028	1
FBgn0013686	NA	18.4289	-0.261512	0.959683	NA	NA
FBgn0013688	NA	6.85865	-0.684729	0.923713	0.458524	1
FBgn0013689	NA	2.55786	-1.17832	0.557401	0.0345189	1
FBgn0013690	NA	-1.43205	-1.43351	5.12863	0.779852	1
FBgn0013694	NA	1.57301	1.18696	0.9663	0.219315	1
FBgn0013699	NA	1.91747	0.10168	0.984267	0.917721	1
FBgn0013704	NA	-0.43472	0.866601	3.59125	0.809315	1
FBgn0013709	NA	0.575222	0.267047	2.92038	0.927141	1
FBgn0013710	NA	0.519122	-2.10661	1.35166	0.119107	1
FBgn0013717	not	10.8899	0.0158698	0.222803	0.943216	1
FBgn0013718	nuf	11.1778	0.0658407	0.161347	0.683224	1
FBgn0013720	pck	11.7391	0.00800079	0.135488	0.952911	1
FBgn0013725	phyl	5.35947	-0.260578	0.405802	0.520788	1
FBgn0013726	pnut	12.0709	0.0833056	0.187335	0.656546	1
FBgn0013732	sced	9.15684	0.0471417	0.10184	0.643436	1
FBgn0013733	shot	13.1372	0.202914	0.229746	0.377121	1
FBgn0013746	alien	10.5383	0.00737918	0.848847	0.993064	1
FBgn0013749	Arf102F	10.3919	-0.107638	1.1538	0.925673	1
FBgn0013750	Arf51F	10.4054	-0.0119756	0.319516	0.970102	1
FBgn0013751	Awh	5.31631	-0.140536	0.589004	0.811416	1
FBgn0013753	Bgb	10.6774	-0.0426359	0.230686	0.853368	1
FBgn0013756	Mtor	12.3323	0.228928	0.173525	0.187075	1
FBgn0013759	CASK	10.6757	0.191156	0.184041	0.298962	1
FBgn0013762	Cdk5	8.69083	-0.118946	0.166096	0.473911	1
FBgn0013763	Idgf6	10.0087	-0.413721	0.56251	0.462041	1
FBgn0013764	Chi	10.9256	0.0394827	0.276809	0.886578	1
FBgn0013765	cnn	10.0434	0.141796	0.154426	0.358505	1
FBgn0013767	Crz	-0.765384	-0.680482	2.79294	0.807507	1
FBgn0013770	Cp1	12.6015	-0.10785	0.134833	0.423783	1
FBgn0013771	Cyp6a9	3.42069	-0.758212	1.4634	0.604376	1
FBgn0013772	Cyp6a8	5.10423	1.00094	1.91025	0.60029	1
FBgn0013773	Cyp6a22	2.8326	-0.564313	1.52146	0.710711	1
FBgn0013799	Deaf1	10.4205	0.10878	0.190149	0.567269	1
FBgn0013810	Dhc36C	3.52385	-1.1011	1.02212	0.281359	1
FBgn0013811	Dhc62B	5.38816	-0.109606	0.312705	0.725956	1
FBgn0013812	Dhc93AB	6.98144	-0.123642	0.386513	0.74905	1
FBgn0013813	Dhc98D	3.07476	-0.680752	1.28928	0.597492	1
FBgn0013949	Elal	4.97828	-1.03282	1.32832	0.436843	1
FBgn0013953	Esp	3.26439	0.513152	0.508781	0.313171	1
FBgn0013954	Fkbp12	13.4392	-0.0530079	0.296301	0.858017	1
FBgn0013972	Gycalpha99B	3.45335	-1.69302	1.04427	0.104966	1
FBgn0013973	Gycbeta100B	1.35161	2.4093	1.26484	0.0568023	1
FBgn0013981	His4r	13.9005	-0.167295	0.116757	0.1519	1
FBgn0013983	imd	9.03867	-0.0585202	0.268776	0.82764	1
FBgn0013987	MAPk-Ak2	11.5764	-0.0088527	0.181409	0.961079	1
FBgn0013995	Calx	2.5558	0.187891	0.869666	0.828949	1
FBgn0013997	Nrx-IV	12.6753	0.0828853	0.324147	0.79818	1
FBgn0014000	Hf	5.03626	-0.432735	1.02759	0.673671	1
FBgn0014006	Ask1	10.864	0.117152	0.164603	0.476635	1
FBgn0014007	Ptp69D	10.0604	0.0905119	0.501453	0.856761	1
FBgn0014009	Rab2	10.7184	-0.0367426	0.162296	0.820895	1
FBgn0014010	Rab5	11.9368	-0.0256697	0.227686	0.910236	1
FBgn0014011	Rac2	10.7185	-0.0101076	0.119411	0.932543	1
FBgn0014018	Rel	10.1082	-0.0341785	0.396398	0.931289	1
FBgn0014019	Rh5	4.71682	-0.73998	0.525882	0.159391	1
FBgn0014020	Rho1	12.8344	-0.0364623	0.300962	0.90357	1
FBgn0014022	Rlb1	8.17437	0.103826	0.177422	0.558418	1
FBgn0014023	mRpL47	9.15096	-0.0926626	0.280565	0.741195	1
FBgn0014024	Rnp4F	10.7435	0.179158	0.120708	0.137748	1
FBgn0014026	RpL7A	15.7353	-0.140805	0.214555	0.511653	1
FBgn0014028	SdhB	10.8597	0.079693	0.334029	0.81143	1
FBgn0014029	2024-09-02	11.2584	-0.00406436	0.0989789	0.967246	1
FBgn0014031	Spat	5.33694	-1.34578	1.19641	0.260654	1
FBgn0014032	Sptr	8.96012	-0.193608	0.164132	0.238164	1
FBgn0014033	Sr-CI	7.57412	-0.111855	0.396925	0.778093	1
FBgn0014037	Su(Tpl)	11.575	0.0568331	0.197766	0.773824	1
FBgn0014073	Tie	9.32574	0.177121	0.243008	0.466082	1
FBgn0014075	Uggt	11.7653	0.0843087	0.373236	0.82129	1
FBgn0014076	Vm32E	0.522857	0.448981	1.73523	0.795833	1
FBgn0014092	CG4278	9.14156	-0.0695135	0.275269	0.800632	1
FBgn0014127	barr	10.9751	0.13072	0.126047	0.299704	1
FBgn0014133	bif	12.9161	0.147616	0.239272	0.537278	1
FBgn0014135	bnl	6.22447	0.243898	0.225027	0.278425	1
FBgn0014141	cher	12.1647	0.194576	0.208183	0.349975	1
FBgn0014163	fax	14.6815	0.0395653	0.237771	0.867841	1
FBgn0014179	gcm	3.76148	0.220057	1.17465	0.851396	1
FBgn0014184	Oda	13.5175	-0.0961812	0.2337	0.680663	1
FBgn0014189	Hel25E	12.726	0.0939855	0.0870028	0.280027	1
FBgn0014269	prod	10.0994	0.0799761	0.166619	0.631231	1
FBgn0014340	mof	8.60016	0.0506966	0.1738	0.77052	1
FBgn0014342	mia	7.7139	0.162977	0.176155	0.354869	1
FBgn0014343	mirr	11.2962	-0.0214278	0.271665	0.937131	1
FBgn0014366	noi	10.3396	0.0603988	0.185176	0.744296	1
FBgn0014368	nol	-0.809741	0.910278	3.09689	0.768809	1
FBgn0014380	RhoL	9.26593	0.0153377	0.288471	0.957597	1
FBgn0014388	sty	10.9912	0.0547861	0.297698	0.853988	1
FBgn0014391	sun	11.0715	-0.0745912	0.184419	0.685871	1
FBgn0014395	tilB	3.62095	-0.893591	0.662313	0.177274	1
FBgn0014396	tim	3.24582	0.22112	0.829754	0.789863	1
FBgn0014411	Vps26	10.8387	0.00250056	0.128429	0.984466	1
FBgn0014417	CG13397	6.20793	-0.154152	0.355885	0.664906	1
FBgn0014427	CG11899	11.702	-0.10492	0.273461	0.701219	1
FBgn0014454	Acp1	2.91867	0	1.62838	1	1
FBgn0014455	Ahcy	11.5042	0.0116374	0.198333	0.95321	1
FBgn0014464	Cp7Fa	-0.968381	-0.00776271	3.85297	0.998392	1
FBgn0014466	Cp7Fc	-0.462913	0	4.39042	1	1
FBgn0014469	Cyp4e2	9.63512	-0.179169	0.566926	0.751975	1
FBgn0014850	Eig71Ej	0.315659	-0.663149	3.02193	0.826303	1
FBgn0014857	His3.3A	11.7945	-0.0500732	0.383648	0.896156	1
FBgn0014859	Hr38	2.84232	0.535131	0.612738	0.382476	1
FBgn0014861	Mcm2	10.3315	0.192504	0.191136	0.31386	1
FBgn0014863	Mlp84B	3.62541	1.26065	0.713446	0.0772297	1
FBgn0014868	Ost48	12.6566	-0.0170838	0.194643	0.93006	1
FBgn0014869	Pglym78	10.1794	-0.0393539	0.226655	0.862157	1
FBgn0014870	Psi	12.1094	0.137745	0.267488	0.606582	1
FBgn0014877	Roe1	8.83684	-0.0439185	0.220695	0.842262	1
FBgn0014879	Set	11.9894	0.0292156	0.238362	0.902449	1
FBgn0014903	CG14630	-0.952634	1.09847	1.93079	0.56941	1
FBgn0014906	Hydr2	9.43128	0.0922613	0.280655	0.742355	1
FBgn0014930	CG2846	8.70569	-0.0285444	0.123444	0.817134	1
FBgn0014931	CG2678	3.35724	0.360299	0.419989	0.39096	1
FBgn0014949	btn	1.45917	-1.66152	1.10582	0.132964	1
FBgn0015000	betaggt-I	9.06203	0.0892679	0.0955819	0.350334	1
FBgn0015001	iotaTry	-1.09433	0	3.83213	1	1
FBgn0015008	Actn3	-1.47355	-0.945877	3.16036	0.764716	1
FBgn0015010	Ag5r	3.16954	-0.258545	0.718406	0.718932	1
FBgn0015011	AhcyL2	5.3806	-0.414636	0.299736	0.166562	1
FBgn0015019	CCT3	12.6938	0.0857474	0.188968	0.649997	1
FBgn0015024	CkIalpha	12.5872	0.0185449	0.135041	0.890772	1
FBgn0015025	CkIIalpha-i1	6.69617	-0.197619	0.472276	0.675625	1
FBgn0015031	cype	11.0431	-0.158234	0.432955	NA	NA
FBgn0015032	Cyp4c3	1.38379	-2.44744	4.88091	NA	NA
FBgn0015033	Cyp4d8	3.69963	-0.294401	1.04809	0.778792	1
FBgn0015034	Cyp4e1	3.37652	0.568605	0.973738	0.55926	1
FBgn0015035	Cyp4e3	1.23265	-3.2013	1.62583	0.0489503	1
FBgn0015036	Cyp4ae1	3.70252	-0.0248156	0.462599	0.957219	1
FBgn0015037	Cyp4p1	3.16983	-1.58357	1.79936	0.378818	1
FBgn0015038	Cyp9b1	0.530327	0.770538	2.89494	0.790111	1
FBgn0015039	Cyp9b2	5.87275	-0.518539	1.42459	0.715864	1
FBgn0015040	Cyp9c1	9.17364	-0.226375	0.346188	0.513172	1
FBgn0015075	Ddx1	10.3248	0.054503	0.128472	0.671392	1
FBgn0015218	eIF4E1	12.7894	-0.00125748	0.168222	0.994036	1
FBgn0015221	Fer2LCH	12.6504	-0.472081	0.171598	0.00593976	1
FBgn0015222	Fer1HCH	12.595	-0.528308	0.0865487	1.03337e-09	6.10724e-06
FBgn0015229	glec	11.7808	-0.0976027	0.282264	0.729504	1
FBgn0015239	Hr78	12.1798	0.00238461	0.214182	0.991117	1
FBgn0015240	Hr96	8.56569	0.0768006	0.21354	0.719105	1
FBgn0015245	Hsp60A	12.8461	0.0620355	0.255678	0.808291	1
FBgn0015247	Diap2	10.0389	-0.0226657	0.156478	0.88483	1
FBgn0015268	Nap1	12.9085	0.0120995	0.0919382	0.895297	1
FBgn0015269	Nf1	9.92428	0.143248	0.395086	0.716923	1
FBgn0015270	Orc2	7.85034	0.229571	0.229788	0.317767	1
FBgn0015271	Orc5	7.93282	0.0462017	0.389289	0.905527	1
FBgn0015277	Pi3K59F	9.06094	0.0611049	0.176534	0.72924	1
FBgn0015278	Pi3K68D	10.6686	0.161892	0.19545	0.407499	1
FBgn0015279	Pi3K92E	10.6769	0.144914	0.236969	0.540848	1
FBgn0015282	Rpt2	12.086	0.0198839	0.12127	0.869759	1
FBgn0015283	Rpn10	11.7007	0.00866046	0.165614	0.958295	1
FBgn0015286	Rala	10.0407	0.0176877	0.216382	0.934851	1
FBgn0015288	RpL22	14.9457	0.0242183	0.341348	0.943438	1
FBgn0015295	Shark	9.98874	0.0937206	0.14268	0.511272	1
FBgn0015296	Shc	9.89966	0.120441	0.189479	0.525011	1
FBgn0015298	Srp19	9.43149	-0.0246931	0.238695	0.917606	1
FBgn0015299	Ssb-c31a	9.03006	-0.0918192	0.584479	0.875169	1
FBgn0015316	Try29F	5.30597	-0.204687	0.323331	0.526697	1
FBgn0015320	Ubc2	11.4188	0.0110361	0.431245	NA	NA
FBgn0015321	Ubc4	10.6371	-0.00234991	0.143396	0.986925	1
FBgn0015331	abs	9.84231	0.134429	0.311458	0.666023	1
FBgn0015336	CG15865	0.0582094	2.96502	1.96119	0.130574	1
FBgn0015338	CG5861	9.85907	-0.018157	0.326681	0.955676	1
FBgn0015351	CG14906	6.77077	0.00857951	0.2279	0.96997	1
FBgn0015359	CG2034	9.41648	0.0250465	0.177713	0.887919	1
FBgn0015360	oxt	8.5502	0.1955	0.147525	0.185106	1
FBgn0015371	chn	10.1338	0.1468	0.249072	0.555602	1
FBgn0015372	RabX1	8.71194	0.0647192	0.139279	0.642166	1
FBgn0015376	cutlet	7.91391	0.213884	0.364562	0.557414	1
FBgn0015379	dod	10.6879	0.0305036	0.334307	0.927299	1
FBgn0015380	drl	12.3727	0.0135536	0.167823	0.935632	1
FBgn0015391	glu	10.3853	0.232449	0.241177	0.33514	1
FBgn0015396	jumu	11.087	0.0415225	0.219316	0.849836	1
FBgn0015399	kek1	11.1072	0.0737306	0.229319	0.747816	1
FBgn0015400	kek2	5.4796	-0.377671	0.484456	0.43564	1
FBgn0015402	ksr	10.2416	0.0772148	0.1914	0.686638	1
FBgn0015477	Rme-8	11.0357	0.229941	0.30133	0.445412	1
FBgn0015509	Cul1	12.3155	0.074086	0.151533	0.624905	1
FBgn0015513	mbc	10.6248	0.118649	0.335388	0.723515	1
FBgn0015519	nAChRalpha3	-0.15734	0.0616085	1.27878	0.961575	1
FBgn0015520	nonA-l	9.39786	-0.0254872	0.257747	0.92123	1
FBgn0015521	RpS21	14.3556	-0.213122	0.49313	NA	NA
FBgn0015522	olf186-M	5.56148	-0.470889	0.389139	0.226249	1
FBgn0015527	peng	10.7461	0.0766909	0.195328	0.694596	1
FBgn0015543	snoRNA:Me28S-A1322	6.23414	0.337208	1.16901	0.772997	1
FBgn0015544	spag	8.61461	0.121414	0.513193	0.812979	1
FBgn0015546	spel1	9.95563	0.16472	0.275699	0.550198	1
FBgn0015550	tap	-1.03252	1.56381	3.18578	0.623517	1
FBgn0015553	tos	6.99431	0.107409	0.260783	0.680435	1
FBgn0015558	tty	6.95135	-0.143879	0.282954	0.61111	1
FBgn0015561	unpg	3.21886	-0.481949	0.668108	0.470685	1
FBgn0015568	alpha-Est1	6.27369	-0.931595	0.839042	0.266866	1
FBgn0015569	alpha-Est10	6.53086	0.220385	0.626181	0.724875	1
FBgn0015570	alpha-Est2	5.48667	-0.652586	2.29182	NA	NA
FBgn0015571	alpha-Est3	7.74749	-0.305551	0.167551	0.0682087	1
FBgn0015572	alpha-Est4	5.17664	-0.46787	0.747043	0.531121	1
FBgn0015575	alpha-Est7	5.54736	-1.04674	1.0832	0.333874	1
FBgn0015576	alpha-Est8	3.3573	-0.985934	0.801491	0.218651	1
FBgn0015577	alpha-Est9	3.72637	0.234983	0.48688	0.629358	1
FBgn0015582	dare	8.70901	-0.107294	0.143136	0.453499	1
FBgn0015586	Acp76A	-1.32761	-1.54304	3.08835	0.617335	1
FBgn0015589	Apc	10.5015	0.168048	0.183534	0.359864	1
FBgn0015591	AstA	1.46122	-0.545702	1.36486	0.689286	1
FBgn0015600	toc	10.605	0.10156	0.11184	0.363835	1
FBgn0015602	BEAF-32	10.3246	0.0158132	0.103433	0.87849	1
FBgn0015609	CadN	11.8536	0.0314567	0.35555	0.929501	1
FBgn0015614	CanB2	10.3832	-0.1063	0.295665	0.7192	1
FBgn0015615	SMC3	10.5912	0.109499	0.227372	0.630102	1
FBgn0015618	Cdk8	8.54114	0.0819123	0.337637	0.808312	1
FBgn0015621	Clp	8.53231	-0.0100122	0.20653	0.961335	1
FBgn0015622	Cnx99A	12.5813	0.147964	0.1513	0.328096	1
FBgn0015623	Cpr	11.7457	0.00748111	0.117855	0.949387	1
FBgn0015625	CycB3	9.93393	0.116409	0.161441	0.470871	1
FBgn0015663	Ugt36A1	6.41076	0.149334	0.552334	0.786877	1
FBgn0015664	Dref	10.7225	0.130567	0.270167	0.628896	1
FBgn0015714	Cyp6a17	7.10298	-0.41907	0.538434	0.436385	1
FBgn0015721	ktub	4.07682	-0.665858	0.561062	0.235314	1
FBgn0015737	Hmu	12.9066	0.0366807	0.180805	0.839234	1
FBgn0015754	Lis-1	11.5894	0.0420562	0.103018	0.683097	1
FBgn0015756	RpL9	14.6885	-0.163668	0.117819	0.164789	1
FBgn0015765	p38a	8.34402	-0.127193	0.405565	0.753811	1
FBgn0015766	Msr-110	13.2557	0.0367777	0.268521	0.891059	1
FBgn0015772	Nak	10.1839	0.0502788	0.163678	0.758706	1
FBgn0015773	NetA	12.0794	-0.0330396	0.538179	0.951047	1
FBgn0015774	NetB	10.454	0.069327	0.27186	0.798716	1
FBgn0015776	nrv1	10.4734	-0.00726491	0.23768	0.975616	1
FBgn0015777	nrv2	11.5438	0.0131363	0.258567	0.959481	1
FBgn0015778	rin	13.6899	0.185742	0.241493	0.44181	1
FBgn0015781	P5cr	9.08054	0.0287813	0.147195	0.844977	1
FBgn0015789	Rab10	10.5826	0.0488841	0.198253	0.805238	1
FBgn0015790	Rab11	12.6039	0.0211576	0.165577	0.898322	1
FBgn0015791	Rab14	9.62527	-0.0113724	0.334741	0.972898	1
FBgn0015793	Rab19	8.3906	-0.0133912	0.292253	0.963453	1
FBgn0015794	Rab18	9.18733	-0.0565348	0.204396	0.782091	1
FBgn0015795	Rab7	11.0729	-0.108679	0.270519	0.687872	1
FBgn0015797	Rab6	11.3357	0.0455381	0.231143	0.843817	1
FBgn0015799	Rbf	10.8812	0.164159	0.145126	0.257993	1
FBgn0015801	Reg-5	8.9328	0.017155	0.186683	0.926783	1
FBgn0015803	RtGEF	10.1234	0.0305142	0.207425	0.883045	1
FBgn0015805	HDAC1	12.1312	0.129145	0.229278	0.573252	1
FBgn0015808	ScpX	10.7827	-0.192036	0.22789	0.399412	1
FBgn0015818	Spx	9.93841	0.0694324	0.213699	0.74525	1
FBgn0015828	TfIIEalpha	9.23591	0.0301554	0.141322	0.83103	1
FBgn0015829	TfIIEbeta	9.42786	0.0538048	0.249004	0.828926	1
FBgn0015831	Rtnl2	1.01451	-0.15126	1.26763	0.905018	1
FBgn0015834	eIF3i	12.6732	-0.119721	0.318955	0.707398	1
FBgn0015838	Vang	11.8389	0.0872806	0.103235	0.397855	1
FBgn0015872	Drip	8.77659	-0.316838	0.199891	0.112953	1
FBgn0015903	apt	7.94028	0.0987018	0.286875	0.730802	1
FBgn0015904	ara	11.3597	-0.0782432	0.149281	0.600185	1
FBgn0015905	ast	8.91399	0.0601377	0.1644	0.714513	1
FBgn0015919	caup	11.2857	0.0398007	0.219871	0.856353	1
FBgn0015924	crq	9.5492	0.0131713	0.458934	0.977104	1
FBgn0015925	csul	8.91927	0.0323388	0.362835	0.92898	1
FBgn0015926	dah	8.61879	0.234206	0.299836	0.434734	1
FBgn0015929	dpa	10.5909	0.246918	0.201188	0.219711	1
FBgn0015946	grim	0.165358	-1.3789	1.80105	0.443911	1
FBgn0015949	hrg	11.9426	0.0927848	0.194357	0.633081	1
FBgn0016013	Faa	7.32122	-0.0446927	0.474113	0.924898	1
FBgn0016032	lbm	4.6062	-0.652026	0.393348	0.0973925	1
FBgn0016034	mael	3.62162	0.383759	0.454344	0.39831	1
FBgn0016036	mei-P22	1.7044	0.215923	0.793816	0.785617	1
FBgn0016038	Vsp37A	10.1076	-0.0350181	0.258657	0.892308	1
FBgn0016041	Tom40	10.3954	0.114896	0.24785	0.642954	1
FBgn0016047	nompA	10.7065	-0.663151	1.44939	0.647285	1
FBgn0016053	pgc	3.16548	0.247717	0.561989	0.659368	1
FBgn0016054	phr6-4	7.79001	-0.0890274	0.314005	0.776776	1
FBgn0016059	Sema1b	12.8515	0.0551344	0.133094	0.67869	1
FBgn0016061	side	5.89224	-0.303808	0.70794	0.667819	1
FBgn0016070	smg	9.56959	0.165477	0.101507	0.103057	1
FBgn0016075	vkg	10.2066	0.164384	0.31852	0.605795	1
FBgn0016076	vri	9.6148	0.17007	0.236204	0.471517	1
FBgn0016078	wun	10.2702	0.08063	0.26301	0.759173	1
FBgn0016081	fry	11.5927	0.1732	0.198727	0.383454	1
FBgn0016119	ATPsynCF6	11.2768	-0.0756203	0.183095	0.679598	1
FBgn0016120	ATPsynD	11.9954	-0.105517	0.331276	0.750093	1
FBgn0016122	Acer	6.75537	0.0328863	0.714029	0.963265	1
FBgn0016123	Alp4	0.578612	0.467426	1.48786	0.7534	1
FBgn0016126	CaMKI	10.9495	-0.0557126	1.17088	0.96205	1
FBgn0016131	Cdk4	10.5177	0.0159192	0.130908	0.903211	1
FBgn0016641	PTP-ER	9.87628	0.149511	0.223381	0.503298	1
FBgn0016650	Lgr1	1.16248	0	1.60146	1	1
FBgn0016660	H15	4.96375	-0.963741	1.16331	0.407419	1
FBgn0016672	Ipp	9.17083	-0.127189	0.150023	0.396553	1
FBgn0016675	Lectin-galC1	-0.816371	0	3.14422	1	1
FBgn0016684	NaPi-T	5.35654	-0.125735	0.345741	0.716107	1
FBgn0016685	Nlp	12.9692	-0.116571	0.261876	0.656221	1
FBgn0016687	Nurf-38	11.9859	-0.0226182	0.202096	0.910888	1
FBgn0016691	ATPsynO	12.1244	-0.0248489	0.285638	0.930676	1
FBgn0016693	Past1	11.1155	-0.0123073	0.227121	0.956785	1
FBgn0016694	Pdp1	6.94607	0.114593	0.333349	0.731026	1
FBgn0016696	Pitslre	12.0944	-0.0269693	0.0916414	0.768536	1
FBgn0016697	Prosalpha5	11.2241	0.0696333	0.192197	0.717126	1
FBgn0016698	Ptpa	8.91513	-0.0717467	0.287165	0.802707	1
FBgn0016701	Rab4	10.2185	-0.10727	0.318843	0.736542	1
FBgn0016715	Reg-2	6.66885	-0.886606	0.569766	0.119687	1
FBgn0016726	RpL29	14.2845	-0.110895	0.164202	0.49945	1
FBgn0016754	sba	10.6889	0.153485	0.208081	0.460745	1
FBgn0016756	Usp47	12.0184	0.201251	0.13283	0.129746	1
FBgn0016762	angel	7.86311	0.0618225	0.537162	0.908373	1
FBgn0016794	dos	10.4216	0.145955	0.195046	0.454271	1
FBgn0016797	fz2	13.1344	0.0928185	0.235196	0.693106	1
FBgn0016917	Stat92E	11.4524	0.101585	0.199525	0.610658	1
FBgn0016919	nompB	4.4182	2.51136	1.40193	0.0732349	1
FBgn0016920	nompC	2.62955	0.0581958	1.56654	0.970366	1
FBgn0016926	Pino	10.5206	-0.0817217	0.215626	0.70469	1
FBgn0016930	Dyrk2	11.6119	-0.00408158	0.343125	0.990509	1
FBgn0016970	l(2)k10201	7.09899	0.0268798	0.239727	0.910723	1
FBgn0016977	spen	12.73	0.100828	0.27699	0.715847	1
FBgn0016978	snRNP-U1-70K	11.3744	0.025767	0.254082	0.919223	1
FBgn0016983	smid	11.5761	0.116086	0.31642	0.713714	1
FBgn0016984	sktl	10.8827	0.154745	0.141628	0.274563	1
FBgn0017414	cag	8.5139	-0.0642776	0.427401	0.880456	1
FBgn0017418	ari-1	9.89537	0.0559992	0.139864	0.688874	1
FBgn0017424	asRNA:CR11538	8.31533	-0.523686	1.39648	0.707657	1
FBgn0017429	CG5989	8.7334	-0.00614	0.141336	0.965349	1
FBgn0017430	Nelf-E	8.92347	-0.0311561	0.229305	0.891923	1
FBgn0017457	U2af38	10.567	-0.0257479	0.146878	0.860843	1
FBgn0017482	T3dh	7.38024	-0.0199337	0.356816	0.955449	1
FBgn0017545	RpS3A	14.8828	-0.115767	0.720595	0.872365	1
FBgn0017550	Rga	11.9999	0.0751118	0.217529	0.729872	1
FBgn0017551	Rca1	9.67572	-0.00202802	0.145318	0.988865	1
FBgn0017558	Pdk	9.38088	-0.319195	0.252466	0.206119	1
FBgn0017561	Ork1	0.870732	1.66481	2.08413	0.424404	1
FBgn0017566	ND-75	11.5409	0.133403	0.333208	0.688891	1
FBgn0017567	ND-23	9.83532	0.0521828	0.137336	0.703973	1
FBgn0017572	Mo25	11.2773	0.0793509	0.0890909	0.373104	1
FBgn0017577	Mcm5	10.0955	0.20032	0.262919	0.446115	1
FBgn0017578	Max	9.80717	-0.0109668	0.146455	0.940309	1
FBgn0017579	RpL14	15.1806	-0.0857857	0.284357	0.762893	1
FBgn0017581	Lk6	13.3902	0.00909325	0.164604	0.955945	1
FBgn0017590	klg	4.98247	-0.288921	0.770874	0.707812	1
FBgn0019624	COX5A	11.4323	0.00226091	0.366515	0.995078	1
FBgn0019637	Atu	10.7538	0.0855661	0.17951	0.633601	1
FBgn0019643	AANAT1	5.12009	-0.153914	0.363369	0.671875	1
FBgn0019644	ATPsynB	12.0105	-0.0304405	0.33693	0.928012	1
FBgn0019650	toy	2.40784	-0.756885	1.21824	0.534407	1
FBgn0019660	lncRNA:roX2	4.74966	0.951663	3.81255	0.802886	1
FBgn0019661	lncRNA:roX1	9.25428	0.231409	1.29692	0.858386	1
FBgn0019662	qm	9.38852	0.00725241	0.147031	0.96066	1
FBgn0019686	lok	9.84448	0.0435413	0.2319	0.851066	1
FBgn0019809	gcm2	3.18268	-1.97328	1.57481	0.210195	1
FBgn0019830	colt	11.258	-0.0197065	0.200591	0.92174	1
FBgn0019890	Smg5	12.0737	0.0882564	0.122257	0.470361	1
FBgn0019925	Surf4	11.6461	-0.0592718	0.0773553	0.443541	1
FBgn0019932	SamDC	7.92992	-0.163528	1.05854	0.877228	1
FBgn0019936	RpS20	14.6424	-0.155832	0.139057	0.262444	1
FBgn0019938	RpI1	10.2162	0.0761192	0.359886	0.83249	1
FBgn0019940	Rh6	1.76998	1.40855	1.7636	0.424477	1
FBgn0019949	Cdk9	9.23829	0.0426767	0.209491	0.838575	1
FBgn0019952	Orct	8.25219	-0.077778	0.169598	0.64652	1
FBgn0019957	ND-42	10.9911	-0.0734464	0.299294	0.806148	1
FBgn0019960	Mitofilin	11.226	0.0769168	0.221911	0.728883	1
FBgn0019968	Khc-73	11.4436	0.122051	0.224275	0.586303	1
FBgn0019972	Drice	10.6892	0.0524216	0.16596	0.752103	1
FBgn0019982	Gs1l	8.39914	-0.0150227	0.269881	0.955609	1
FBgn0019985	mGluR	6.06012	-0.171949	0.663401	0.795486	1
FBgn0019990	Gcn2	10.4576	0.0915973	0.234988	0.696687	1
FBgn0020018	Ppox	8.41533	-0.0862784	0.168819	0.609301	1
FBgn0020224	Cbl	10.3606	-0.0532039	0.169297	0.753321	1
FBgn0020235	ATPsyngamma	12.2652	-0.00654955	0.218584	0.976096	1
FBgn0020236	ATPCL	12.1515	0.115163	0.108477	0.288402	1
FBgn0020238	14-3-3epsilon	14.8579	0.0656982	0.0882235	0.456466	1
FBgn0020248	stet	3.89682	0.780722	1.5455	0.613448	1
FBgn0020249	stck	10.3272	-0.0383526	0.322061	0.905208	1
FBgn0020251	sfl	9.56224	0.0330584	0.327549	0.919609	1
FBgn0020255	Ran	13.151	0.0118346	0.211644	0.955407	1
FBgn0020257	Ppa	12.0674	0.0570839	0.211855	0.787585	1
FBgn0020258	ppk	4.42851	-0.12934	0.479932	0.787548	1
FBgn0020261	pcm	11.0604	0.260868	0.21732	0.229989	1
FBgn0020269	mspo	6.92751	-0.164561	0.398305	0.679495	1
FBgn0020270	mre11	9.88882	-0.0564826	0.268683	0.833496	1
FBgn0020272	mst	8.16509	0.000808463	0.171559	0.99624	1
FBgn0020277	lush	1.59704	0.147401	1.01908	0.884994	1
FBgn0020278	loco	10.7381	0.0896488	0.174391	0.607205	1
FBgn0020279	lig	14.1557	0.234204	0.265	0.37681	1
FBgn0020294	ko	11.4489	0.0287063	0.195099	0.883024	1
FBgn0020299	stumps	9.0467	0.00301736	0.179638	0.986599	1
FBgn0020300	geko	8.80151	-0.14437	0.411478	0.725696	1
FBgn0020304	drongo	11.5778	0.107436	0.241549	0.656479	1
FBgn0020305	dbe	9.64867	-0.0119791	0.114042	0.916344	1
FBgn0020306	dom	12.854	0.226791	0.163204	0.164647	1
FBgn0020307	dve	9.56422	0.237562	0.249123	0.340289	1
FBgn0020309	crol	13.5313	0.214726	0.203964	0.29245	1
FBgn0020312	Tmtc3	10.6298	0.0467762	0.145135	0.747229	1
FBgn0020369	Rpt6	11.8961	-0.000343812	0.109656	0.997498	1
FBgn0020370	TppII	12.1506	0.125481	0.153365	0.413254	1
FBgn0020372	TM4SF	5.47278	-0.0773633	0.611824	0.899378	1
FBgn0020376	Sr-CIII	1.48576	-0.7772	1.22758	0.526658	1
FBgn0020378	Sp1	7.3009	0.222234	0.972142	0.819178	1
FBgn0020379	Rfx	8.53052	0.166238	0.226993	0.463955	1
FBgn0020381	Dredd	10.2144	0.0144376	0.367133	0.968631	1
FBgn0020385	pug	11.0183	-0.296315	0.196181	0.130937	1
FBgn0020386	Pdk1	11.1775	0.0773844	0.198819	0.697113	1
FBgn0020388	Gcn5	10.4456	0.151433	0.188301	0.42128	1
FBgn0020389	Papss	11.5453	0.0732118	0.242093	0.762338	1
FBgn0020391	Nrk	6.99074	0.113014	0.19953	0.571121	1
FBgn0020392	Nmt	10.7482	0.0638508	0.369122	0.862667	1
FBgn0020399	Mst89B	2.61707	0.0530519	0.487974	0.913426	1
FBgn0020407	asun	8.19139	0.0840449	0.140889	0.55082	1
FBgn0020412	JIL-1	10.4964	0.194775	0.168134	0.24668	1
FBgn0020414	Idgf3	7.87409	-0.480175	0.733255	0.512562	1
FBgn0020415	Idgf2	6.47276	-0.399257	0.689377	0.562484	1
FBgn0020416	Idgf1	6.00701	-0.67743	0.496872	0.17276	1
FBgn0020429	GluRIIB	0.548764	0	2.08137	1	1
FBgn0020440	Fak	9.85314	0.0409254	0.479392	0.931968	1
FBgn0020443	eRF3	12.419	0.075019	0.169275	0.657636	1
FBgn0020445	E23	7.96219	0.445593	0.504163	0.376789	1
FBgn0020493	Dad	11.0311	-0.00466438	0.159012	0.976599	1
FBgn0020496	CtBP	13.5618	0.147908	0.269371	0.582946	1
FBgn0020497	emb	11.8548	0.164456	0.369996	0.656696	1
FBgn0020503	CLIP-190	9.80697	0.148482	0.331238	0.653964	1
FBgn0020508	Ag5r2	0.505903	1.48657	1.60526	0.354413	1
FBgn0020510	Abi	10.645	0.0542047	0.237388	0.819384	1
FBgn0020513	Paics	11.1927	-0.208979	0.12022	0.0821567	1
FBgn0020518	snoRNA:Me28S-G764	-0.876259	-0.978376	2.60857	0.707615	1
FBgn0020521	pio	14.4379	0.0942823	0.318633	0.76731	1
FBgn0020545	kraken	9.11365	-0.027563	0.23588	0.906978	1
FBgn0020616	SA	10.5	0.0753838	0.336728	0.822857	1
FBgn0020617	Rx	4.40631	0.779542	1.56582	0.618591	1
FBgn0020618	Rack1	15.5262	-0.112724	0.202895	0.578499	1
FBgn0020620	RN-tre	10.3379	0.0765127	0.125429	0.541858	1
FBgn0020621	Pkn	11.9531	0.0896273	0.196344	0.648044	1
FBgn0020622	Pi3K21B	10.3737	-0.0200558	0.270697	0.940939	1
FBgn0020626	Osbp	10.5716	0.119464	0.193631	0.537257	1
FBgn0020633	Mcm7	10.6016	0.205306	0.217991	0.34629	1
FBgn0020637	Lcp65Ag2	3.30582	0.774767	1.2045	0.520077	1
FBgn0020638	Lcp65Ag1	-0.124769	0.144501	3.03994	0.962087	1
FBgn0020639	Lcp65Af	0.552844	0.737187	1.86826	0.693149	1
FBgn0020641	Lcp65Ad	1.60538	-1.17592	0.908032	0.195313	1
FBgn0020642	Lcp65Ac	0.937418	-4.3482	4.925	NA	NA
FBgn0020647	KrT95D	11.2324	0.135433	0.236633	0.567095	1
FBgn0020653	Trxr-1	13.1518	-0.00302759	0.302914	0.992025	1
FBgn0020655	ArfGAP1	10.7567	0.0445276	0.151911	0.769433	1
FBgn0020660	eIF4B	9.64916	-0.112709	0.973096	NA	NA
FBgn0020762	Atet	10.1387	-0.260955	0.434518	0.548131	1
FBgn0020764	Alas	9.95316	-0.0434255	0.151889	0.774952	1
FBgn0020765	Acp65Aa	5.04101	0.779542	1.62142	0.630674	1
FBgn0020767	Spred	10.9207	0.0664886	0.239013	0.780874	1
FBgn0020880	CG7179	0.531667	-0.119451	1.77512	0.946349	1
FBgn0020887	Su(z)12	10.3052	0.225937	0.134402	0.0927541	1
FBgn0020906	Jon25Bi	1.37532	0.855205	1.71484	0.617984	1
FBgn0020908	Scp1	-0.343765	-0.360487	1.76224	0.837915	1
FBgn0020909	Rtc1	8.87722	0.00372841	0.248915	0.988049	1
FBgn0020910	RpL3	16.3586	-0.0629459	0.214712	0.769397	1
FBgn0020912	Ptx1	-0.786719	0	3.84229	1	1
FBgn0020930	Dgkepsilon	9.43588	-0.00642136	0.176224	0.970933	1
FBgn0021738	Crg-1	-0.210948	-0.475878	2.99019	0.873553	1
FBgn0021742	C901	2.78713	3.52297	1.7124	0.0396546	1
FBgn0021750	SerRS-m	8.72191	0.175933	0.112991	0.119459	1
FBgn0021760	chb	10.943	0.200016	0.192202	0.298034	1
FBgn0021761	Nup154	10.8941	0.078344	0.43489	0.857037	1
FBgn0021764	sdk	13.0372	0.164691	0.197089	0.40337	1
FBgn0021765	scu	11.6252	-0.105082	0.337802	0.755744	1
FBgn0021767	org-1	1.01402	-0.663151	1.65334	0.688349	1
FBgn0021768	nudC	10.5411	0.0527182	0.214725	0.806058	1
FBgn0021776	mira	5.43817	-0.064832	0.550694	0.906283	1
FBgn0021795	Tapdelta	12.7708	-0.0123314	0.279851	0.964853	1
FBgn0021796	Tor	11.0026	0.264206	0.316771	0.404247	1
FBgn0021800	Reph	9.6482	-0.108787	0.303878	0.720347	1
FBgn0021814	Vps28	9.38972	-0.0335993	0.219515	0.87835	1
FBgn0021825	DCTN2-p50	10.7378	0.0915189	0.181657	0.614401	1
FBgn0021847	Ttc7	9.24556	0.0703622	0.157257	0.654562	1
FBgn0021856	l(2)k14505	9.20465	-0.0551356	0.258046	0.830808	1
FBgn0021872	Xbp1	12.9194	0.0320298	0.251608	0.898703	1
FBgn0021874	Nle	9.28947	0.0504966	0.241758	0.834548	1
FBgn0021875	Zfrp8	8.9428	0.0203968	0.245321	0.933737	1
FBgn0021895	ytr	11.7425	0.0327001	0.223713	0.883788	1
FBgn0021906	RFeSP	10.9408	0.0133323	0.392471	0.972901	1
FBgn0021944	Coprox	9.73495	0.0328602	0.256116	0.89791	1
FBgn0021967	ND-PDSW	10.1675	-0.0804354	0.189615	0.671418	1
FBgn0021979	l(2)k09913	11.9869	-0.0299937	0.190334	0.874784	1
FBgn0021995	Rs1	10.0959	0.0152393	0.128284	0.905439	1
FBgn0022023	eIF3h	12.3703	-0.0358716	0.234288	0.878312	1
FBgn0022027	Vps25	8.8842	-0.21852	0.227806	0.337439	1
FBgn0022029	l(2)k01209	10.2729	0.0155686	0.363733	0.965859	1
FBgn0022069	Nnp-1	10.7834	0.0698169	0.139732	0.617322	1
FBgn0022097	Vha36-1	10.4441	-0.0655552	0.34271	0.848303	1
FBgn0022153	l(2)k05819	10.88	0.175616	0.254706	0.490519	1
FBgn0022160	Gpo1	6.83499	0.249213	0.390634	0.523492	1
FBgn0022213	Cse1	11.6029	0.0923555	0.48044	0.847561	1
FBgn0022224	ubl	8.78236	-0.208359	0.950344	0.826459	1
FBgn0022238	lolal	11.5793	0.023639	0.231757	0.918757	1
FBgn0022288	l(2)09851	10.1337	0.00976601	0.240814	0.967651	1
FBgn0022338	dnk	8.68017	-0.218521	0.432723	0.613566	1
FBgn0022343	CG3760	12.025	-0.00490394	0.268146	0.985409	1
FBgn0022344	CG10340	9.47209	-0.00430475	0.340053	0.9899	1
FBgn0022349	CG1910	12.1633	0.157647	0.129632	0.223944	1
FBgn0022355	Tsf1	15.0655	0.284849	0.736511	0.698938	1
FBgn0022359	Sodh-2	5.11755	0.343901	0.526084	0.513305	1
FBgn0022361	Pur-alpha	10.1648	-0.113693	0.954276	NA	NA
FBgn0022382	Pka-R2	8.66525	-0.0251697	0.297933	0.932674	1
FBgn0022699	D19B	10.3741	0.122552	0.193979	0.527531	1
FBgn0022702	Cht2	12.7027	-0.169681	0.26109	0.515761	1
FBgn0022709	Ak1	6.66405	-0.0650514	0.179981	0.717775	1
FBgn0022710	Ac13E	8.02086	-0.0997794	0.20849	0.632236	1
FBgn0022724	Taf8	8.4683	-0.0843473	0.1492	0.571849	1
FBgn0022764	Sin3A	13.0309	0.171279	0.261492	0.512463	1
FBgn0022768	Pp2C1	10.4229	0.174924	0.207957	0.40026	1
FBgn0022770	Peritrophin-A	4.65021	-0.0994295	0.545587	0.855392	1
FBgn0022774	Oat	7.84683	0.33416	0.397584	0.400641	1
FBgn0022786	Hira	9.1056	0.141224	0.328208	0.666987	1
FBgn0022787	Hel89B	11.3452	0.1825	0.20113	0.364208	1
FBgn0022800	Cad96Ca	8.95837	-1.67611	0.314973	1.02949e-07	0.000304213
FBgn0022893	Df31	15.7762	-0.042342	0.195928	0.828902	1
FBgn0022935	D19A	10.5833	0.0787931	0.147222	0.592511	1
FBgn0022936	CycH	8.62902	-0.0677863	0.300314	0.821421	1
FBgn0022942	Cbp80	11.3426	0.0725967	0.262858	0.782408	1
FBgn0022943	Cbp20	9.44231	-0.130019	0.152377	0.393511	1
FBgn0022959	yps	13.6806	0.0751832	0.295756	0.799336	1
FBgn0022960	vimar	10.5667	0.119791	0.131524	0.362402	1
FBgn0022981	rpk	7.94741	0.153872	0.346938	0.657393	1
FBgn0022984	qkr58E-3	11.1463	-0.040187	0.189139	0.831737	1
FBgn0022985	qkr58E-2	10.4082	0.11194	0.223115	0.615869	1
FBgn0022986	qkr58E-1	10.8184	-0.014112	0.210605	0.946576	1
FBgn0022987	qkr54B	10.2955	0.0217924	0.115973	0.850948	1
FBgn0023000	mth	11.1391	-0.0999676	0.700946	0.886592	1
FBgn0023001	melt	12.0389	0.253751	0.124052	0.040803	1
FBgn0023023	CRMP	12.4012	0.285232	0.301527	0.34417	1
FBgn0023081	gek	10.8404	0.127803	0.286627	0.65568	1
FBgn0023083	fray	9.99197	-0.0146662	0.252775	0.953732	1
FBgn0023090	dtr	5.46329	0.0811616	0.851038	0.924023	1
FBgn0023094	cyc	10.086	-0.0350996	0.150406	0.815477	1
FBgn0023095	caps	10.7556	0.132475	0.139214	0.341303	1
FBgn0023096	btv	4.86884	0.140431	0.646305	0.827988	1
FBgn0023097	bon	11.6025	0.171342	0.227653	0.451663	1
FBgn0023129	aay	7.26756	-0.1551	0.27658	0.574949	1
FBgn0023130	a6	9.30606	0.0530166	0.328839	0.871917	1
FBgn0023143	Uba1	13.7263	0.159087	0.16372	0.3312	1
FBgn0023167	SmD3	11.1799	-0.0942474	0.239595	0.694053	1
FBgn0023169	AMPKalpha	11.2046	-0.0110029	0.255573	0.96566	1
FBgn0023170	RpL39	13.4736	-0.26745	1.01071	0.791305	1
FBgn0023171	rnh1	8.62561	-0.144363	0.153216	0.34608	1
FBgn0023172	RhoGEF2	12.1569	0.191879	0.205681	0.350873	1
FBgn0023174	Prosbeta2	11.6093	0.00662192	0.354932	0.985115	1
FBgn0023175	Prosalpha7	11.5715	-0.0590114	0.138387	0.669799	1
FBgn0023177	Pp4-19C	11.5712	-0.0228501	0.152069	0.880558	1
FBgn0023179	amon	2.83832	-0.721875	1.19013	0.544149	1
FBgn0023180	Orc6	6.5873	-0.129203	0.315565	0.682221	1
FBgn0023181	Orc4	8.82005	0.0321917	0.307614	0.916654	1
FBgn0023197	Jon74E	-0.788665	0.616685	3.72569	0.868533	1
FBgn0023212	EloB	10.9796	-0.0253298	0.212466	0.905103	1
FBgn0023213	eIF4G1	12.415	0.15038	0.377188	0.690124	1
FBgn0023214	edl	9.11898	-0.083118	0.139173	0.550354	1
FBgn0023215	Mnt	10.3529	0.180038	0.422104	0.669726	1
FBgn0023216	Parg	8.76757	-0.0658353	0.24072	0.784474	1
FBgn0023388	Dap160	10.6863	0.0988461	0.150906	0.512457	1
FBgn0023395	Chd3	7.03922	0.190179	0.242498	0.432892	1
FBgn0023407	B4	11.1521	0.084645	0.113227	0.454722	1
FBgn0023415	Acp32CD	8.21072	1.28242	1.03493	0.215298	1
FBgn0023416	Ac3	8.49146	0.0116778	0.435791	0.978622	1
FBgn0023441	fus	12.553	0.131339	0.267887	0.623936	1
FBgn0023458	Rbcn-3A	11.8063	0.323289	0.244795	0.186617	1
FBgn0023477	Taldo	11.6917	-0.0187429	0.161568	0.907647	1
FBgn0023479	teq	7.33419	-0.682853	0.708635	0.335238	1
FBgn0023489	Pph13	0.644125	1.30495	1.72583	0.449572	1
FBgn0023496	Lip1	1.79099	-0.538667	0.923127	0.559541	1
FBgn0023506	Es2	8.28022	-0.0250833	0.199582	0.899986	1
FBgn0023507	D2hgdh	6.92172	0.265582	0.433495	0.540105	1
FBgn0023508	Ocrl	10.0348	0.0773839	0.183984	0.674046	1
FBgn0023509	mip130	10.6021	0.0776033	0.184436	0.67393	1
FBgn0023510	Rbcn-3B	9.99205	0.0904261	0.164254	0.581958	1
FBgn0023511	Edem1	10.1546	0.0348157	0.167058	0.834913	1
FBgn0023512	eIF2Bepsilon	9.92462	0.0559395	0.135369	0.679434	1
FBgn0023513	CG14803	8.79567	0.2575	0.191411	0.178538	1
FBgn0023514	CG14805	9.57416	0.0366303	0.0858738	0.6697	1
FBgn0023515	CG14814	9.21638	0.185082	0.154038	0.229545	1
FBgn0023516	Pex5	8.89034	-0.0391442	0.143616	0.78519	1
FBgn0023517	Pgam5	10.0761	0.0160489	0.273641	0.953231	1
FBgn0023518	trr	10.8664	0.199546	0.204649	0.329528	1
FBgn0023519	mRpL16	9.16962	-0.108415	0.216107	0.615896	1
FBgn0023520	CG3857	8.76801	0.0525585	0.248722	0.832642	1
FBgn0023521	CG3587	8.40521	0.0227955	0.188049	0.903516	1
FBgn0023522	CG11596	9.67484	-0.00352788	0.212417	0.986749	1
FBgn0023523	Or2a	3.53442	-0.346711	0.520397	0.505255	1
FBgn0023524	CG3078	3.31727	-3.55919	1.24499	0.00425236	1
FBgn0023525	CG3191	3.65236	-0.270994	0.456605	0.552848	1
FBgn0023526	CG2865	9.57116	0.0296447	0.347176	0.931953	1
FBgn0023527	CG3071	9.07767	-0.00522991	0.276572	0.984913	1
FBgn0023528	CG2924	11.0995	0.0298552	0.26013	0.908627	1
FBgn0023529	CG2918	13.0677	0.117653	0.175416	0.502409	1
FBgn0023530	CG3740	7.75231	-0.142132	0.408092	NA	NA
FBgn0023531	CG32809	8.77965	-0.00371439	0.336878	0.991203	1
FBgn0023534	CG17778	3.70728	-0.166377	0.565997	0.768794	1
FBgn0023535	arg	6.2259	-0.499897	0.762456	0.512055	1
FBgn0023536	CG3156	8.04866	-0.036349	0.25834	0.888105	1
FBgn0023537	CG17896	11.7085	0.110279	0.1377	0.42321	1
FBgn0023540	CG3630	9.48548	0.0745164	0.213647	0.727253	1
FBgn0023541	Cyp4d14	5.49471	0.226253	0.419171	0.58936	1
FBgn0023542	Nmd3	9.55125	-0.160139	0.178204	0.368852	1
FBgn0023545	PIG-K	9.53118	-0.173615	0.190465	0.362016	1
FBgn0023549	Mct1	8.97356	-0.766765	0.480617	0.110628	1
FBgn0023550	FarO	1.43163	-1.76618	1.55023	0.254576	1
FBgn0024150	Ac78C	4.00329	-0.324729	0.497561	0.513987	1
FBgn0024179	wit	10.3271	0.042607	0.153194	0.780916	1
FBgn0024183	vig	11.7647	0.0189487	0.283455	0.946702	1
FBgn0024184	unc-4	4.8817	-0.445396	1.11947	0.69073	1
FBgn0024187	syd	10.4235	0.104096	0.152667	0.495334	1
FBgn0024188	san	9.88548	0.00727693	0.205448	0.971745	1
FBgn0024189	sns	10.1228	0.184299	0.23833	0.43935	1
FBgn0024191	sip1	9.00144	0.0967062	0.150883	0.521565	1
FBgn0024194	rasp	8.77986	-0.0107686	0.356035	0.975871	1
FBgn0024196	robl	9.65951	-0.205494	0.503579	0.683225	1
FBgn0024222	IKKbeta	8.57257	0.0358802	0.413442	0.930843	1
FBgn0024227	aurB	9.38393	0.0104788	0.442532	0.981108	1
FBgn0024230	Hs2st	8.78534	-0.0695442	0.301088	0.817333	1
FBgn0024232	gprs	3.91326	0.612028	0.52392	0.242738	1
FBgn0024234	gbb	12.1857	-0.00805745	0.264485	0.975696	1
FBgn0024236	foi	10.2971	0.0957069	0.196924	0.626961	1
FBgn0024238	Fim	11.0056	0.0793042	0.281162	0.777899	1
FBgn0024244	drm	10.1979	0.0103915	0.413597	0.979956	1
FBgn0024245	dnt	10.3473	-0.0680204	0.30153	0.821525	1
FBgn0024248	chico	9.42736	0.0275273	0.408306	0.946249	1
FBgn0024249	cato	1.9059	0.135164	0.79963	0.865771	1
FBgn0024250	brk	10.6887	0.122339	0.107359	0.254482	1
FBgn0024251	bbx	1.44688	0.407115	1.51681	0.78839	1
FBgn0024273	WASp	9.50824	0.0866548	0.223104	0.697716	1
FBgn0024277	trio	12.004	0.19392	0.156084	0.214086	1
FBgn0024285	Srp54	11.6862	0.0465929	0.178735	0.794338	1
FBgn0024288	Sox100B	5.28499	-0.281344	0.274209	0.304883	1
FBgn0024289	Sodh-1	3.90307	0.194517	2.78304	NA	NA
FBgn0024291	Sirt1	10.9552	0.0387959	0.109347	0.722743	1
FBgn0024293	Spn43Ab	3.63914	1.17961	1.73008	0.495352	1
FBgn0024294	Spn43Aa	17.3852	-0.13565	0.623685	0.827821	1
FBgn0024314	Plap	11.1319	0.0406106	0.116998	0.728513	1
FBgn0024315	Picot	3.78648	0.560196	0.474916	0.238171	1
FBgn0024320	Npc1a	10.899	0.00827944	0.570465	0.98842	1
FBgn0024321	NK7.1	8.4015	0.113922	0.129782	0.380055	1
FBgn0024326	Mkk4	10.5005	0.0174601	0.166956	0.91671	1
FBgn0024329	Mekk1	11.3062	0.261645	0.200241	0.19133	1
FBgn0024330	MED6	9.34086	0.0339215	0.265685	0.898406	1
FBgn0024352	Stip1	12.1216	0.113786	0.123378	0.356396	1
FBgn0024360	MTPAP	8.86032	0.117452	0.241321	0.626466	1
FBgn0024361	Tsp2A	4.01482	0.0452153	0.699812	0.948484	1
FBgn0024362	Naa30A	10.5294	0.0977545	0.122462	0.42473	1
FBgn0024364	CG11417	9.29988	0.170041	0.128948	0.187278	1
FBgn0024365	CG12773	10.7079	0.0857437	0.164883	0.603044	1
FBgn0024366	CG11409	10.8366	-0.151758	0.31721	0.632356	1
FBgn0024371	E2f2	9.40189	-0.0488278	0.489012	0.920463	1
FBgn0024432	Dlc90F	10.9673	-0.141097	0.253206	0.577364	1
FBgn0024491	Bin1	9.89528	-0.0668957	0.254499	0.792664	1
FBgn0024509	Sec13	11.5211	0.0109019	0.188446	0.953867	1
FBgn0024510	dlt	7.94841	0.169408	0.271562	0.532739	1
FBgn0024542	Neos	8.98335	0.0260101	0.200544	0.896805	1
FBgn0024555	flfl	11.8735	0.145553	0.141234	0.30274	1
FBgn0024556	mEFTu1	11.0531	-0.0109358	0.199362	0.956255	1
FBgn0024558	Dph5	10.0612	0.0321304	0.24068	0.893799	1
FBgn0024689	fws	9.90802	0.0624738	0.078598	0.426699	1
FBgn0024698	Cpsf160	9.5879	0.0627102	0.423707	0.88234	1
FBgn0024728	Slip1	10.413	0.0105721	0.994619	NA	NA
FBgn0024732	Drep1	8.06066	-0.0102137	0.222312	0.963356	1
FBgn0024733	RpL10	15.0345	-0.106562	0.705764	0.879985	1
FBgn0024734	PRL-1	7.6582	0.317146	1.33885	0.812751	1
FBgn0024740	Lip2	0.0276734	-1.39917	5.03511	0.781102	1
FBgn0024754	Flo1	10.9249	0.0248688	0.264385	0.925059	1
FBgn0024804	Dbp80	10.4129	-0.0666312	0.805244	0.934053	1
FBgn0024806	DIP2	10.9893	0.0904409	0.524362	0.863062	1
FBgn0024807	DIP1	12.8071	0.0263265	0.121836	0.828924	1
FBgn0024811	Crk	10.6599	-0.140413	0.825622	NA	NA
FBgn0024814	Clc	12.0776	0.00963372	0.159974	0.95198	1
FBgn0024833	AP-1mu	10.7516	0.0328664	0.383374	0.931682	1
FBgn0024836	stan	12.4748	0.161063	0.352175	0.647428	1
FBgn0024841	Pcd	9.95236	-0.259486	0.191371	0.175119	1
FBgn0024846	p38b	9.76116	-0.0046218	0.20604	0.982104	1
FBgn0024887	kin17	9.5367	-0.0593885	0.275595	0.829384	1
FBgn0024889	Kap-alpha1	10.1288	0.00965904	0.244613	0.968502	1
FBgn0024897	b6	3.97333	-0.898855	0.670835	0.180276	1
FBgn0024909	Taf7	8.42744	-0.0392876	0.391309	0.920026	1
FBgn0024912	agt	8.63715	-0.129574	0.180713	0.473364	1
FBgn0024913	Actbeta	2.61083	2.83706	1.64968	0.0854755	1
FBgn0024920	Ts	9.24059	0.123117	0.215249	0.567339	1
FBgn0024921	Tnpo	10.7943	0.129155	0.205334	0.529351	1
FBgn0024941	RSG7	4.20664	-0.926427	0.845687	0.273309	1
FBgn0024944	Oamb	0.653648	-0.361148	1.38499	0.794278	1
FBgn0024945	NitFhit	8.8844	0.0196442	0.317024	0.950591	1
FBgn0024947	NTPase	10.5762	0.0227696	0.118219	0.847268	1
FBgn0024956	Mat1	9.39816	-0.0934797	0.239305	0.696071	1
FBgn0024957	Irp-1B	11.3316	0.0649597	0.208762	0.755674	1
FBgn0024958	Irp-1A	10.3184	-0.00957226	0.345298	0.977884	1
FBgn0024963	GluClalpha	2.76931	1.34819	1.47975	0.362248	1
FBgn0024973	CG2701	10.0968	0.0651802	0.198452	0.742577	1
FBgn0024975	CG2712	7.74309	0.141639	0.176247	0.421603	1
FBgn0024980	Syx4	2.49323	0.156604	0.661256	0.81279	1
FBgn0024983	CG4293	9.88599	0.0466317	0.215516	0.828698	1
FBgn0024984	CG3457	1.72676	-0.182285	0.804597	0.82077	1
FBgn0024985	Rilpl	10.5058	0.0668198	0.187779	0.721958	1
FBgn0024986	CG3719	9.03764	-0.00995859	0.170546	0.953436	1
FBgn0024987	ssx	11.2217	0.127976	0.1231	0.298519	1
FBgn0024989	CG3777	10.0948	0.134776	0.240975	0.575959	1
FBgn0024991	CG2694	8.94098	0.218613	0.317052	0.490498	1
FBgn0024992	Spg7	9.01808	0.102817	0.156145	0.510234	1
FBgn0024993	CG2662	7.47985	-0.0713327	0.180575	0.69282	1
FBgn0024994	Ugalt	9.77592	0.0757765	0.133836	0.571264	1
FBgn0024995	CG2680	-0.230059	1.09796	1.77133	0.535355	1
FBgn0024996	eIF2Bbeta	9.74871	-0.0494539	0.187918	0.792421	1
FBgn0024997	CG2681	0.76559	-0.872263	1.67008	0.60147	1
FBgn0024998	CG2685	9.24321	0.104965	0.222754	0.637488	1
FBgn0025109	Bem46	8.40189	0.0697341	0.15306	0.648677	1
FBgn0025111	Ant2	6.92667	-0.0661116	0.242532	0.785169	1
FBgn0025185	az2	8.29521	0.075191	0.206447	0.715698	1
FBgn0025186	ari-2	10.5245	0.0547016	0.160829	0.733764	1
FBgn0025334	PHDP	-1.05873	0	4.56275	1	1
FBgn0025335	Cpes	9.2613	0.113979	0.324713	0.725578	1
FBgn0025336	CG4882	9.49038	-0.0284477	0.381289	0.940526	1
FBgn0025352	Mtpbeta	11.9028	-0.0331177	0.204867	0.871578	1
FBgn0025360	Optix	8.93247	0.00614574	0.227721	0.978469	1
FBgn0025366	Ip259	12.1265	-0.105278	0.23563	0.655025	1
FBgn0025373	Fpps	10.9079	-0.0807006	0.196548	0.681373	1
FBgn0025381	rush	10.4888	0.0626947	0.262569	0.811281	1
FBgn0025382	Rab27	7.81878	0.174698	0.340299	0.607697	1
FBgn0025383	CG14780	-0.255701	-0.359513	2.2284	0.871831	1
FBgn0025387	CG12184	2.62361	-0.665674	0.983861	0.498664	1
FBgn0025388	CG12179	9.09423	0.195852	0.17786	0.270827	1
FBgn0025390	Mur2B	8.05926	-0.272686	0.35812	0.446397	1
FBgn0025391	Scgdelta	0.961411	0.0581958	1.73806	0.973289	1
FBgn0025393	CG14795	1.26893	0.231772	1.05236	0.825685	1
FBgn0025394	inc	11.3648	0.06653	0.179384	0.710727	1
FBgn0025454	Cyp6g1	10.3339	-0.769665	1.28948	0.550588	1
FBgn0025455	CycT	11.2273	0.103171	0.193113	0.593168	1
FBgn0025456	CREG	8.91033	-0.305203	0.78701	0.698163	1
FBgn0025457	Bub3	11.2484	0.0255576	0.322693	0.936873	1
FBgn0025463	Bap60	12.1451	0.0208715	0.210547	0.921035	1
FBgn0025469	slv	8.90666	-0.0371664	0.120613	0.757972	1
FBgn0025519	fidipidine	9.40262	0.0732589	0.330333	0.824491	1
FBgn0025525	bab2	9.66766	-0.075058	0.336562	0.823525	1
FBgn0025549	unc-119	10.0083	-0.0821201	0.266221	0.757728	1
FBgn0025558	CG4101	8.49052	-0.159923	0.359686	0.656596	1
FBgn0025571	SF1	12.0907	0.0354994	0.259898	0.891355	1
FBgn0025574	Pli	11.0456	0.0490819	0.142038	0.729678	1
FBgn0025578	Lcp9	3.33088	3.46943	1.1113	0.00179647	0.974117
FBgn0025582	eIF3e	12.4348	-0.0494547	0.289438	0.86433	1
FBgn0025592	Gk1	9.00142	0.0301258	0.207121	0.884356	1
FBgn0025595	AkhR	3.76797	0.0692549	1.34065	0.958801	1
FBgn0025608	Faf2	10.3553	0.0325794	0.119681	0.785454	1
FBgn0025613	CG3081	0.402817	0	2.33309	1	1
FBgn0025615	Torsin	10.929	-0.0503062	0.351353	0.886149	1
FBgn0025616	CG13359	-0.4018	1.85324	2.01606	0.35797	1
FBgn0025620	CG13360	5.9547	0.106678	1.07499	0.920951	1
FBgn0025621	CG16989	9.92361	0.109119	0.161783	0.500009	1
FBgn0025624	CG4025	8.43527	-0.196039	0.149027	0.188354	1
FBgn0025625	Sik2	6.80357	0.135901	0.357786	0.704066	1
FBgn0025626	CG4281	10.4346	0.0354801	0.0949824	0.708744	1
FBgn0025627	CG4194	7.25032	0.365266	0.348172	0.294134	1
FBgn0025628	CG4199	11.2929	-0.121041	0.131941	0.358942	1
FBgn0025629	CG4045	9.17412	-0.174044	0.143269	0.224442	1
FBgn0025630	Rtca	9.68838	-0.0922891	0.127949	0.470726	1
FBgn0025631	moody	8.50736	0.289766	0.349491	0.407044	1
FBgn0025632	CG4313	7.31042	0.106782	0.275249	0.698057	1
FBgn0025633	CG13366	11.5616	0.155303	0.135027	0.250075	1
FBgn0025634	CG13367	9.48309	0.0510645	0.249759	0.837998	1
FBgn0025635	CG17829	8.89837	-0.000170831	0.130748	0.998958	1
FBgn0025637	SkpA	11.9276	-0.0575668	0.335292	0.86368	1
FBgn0025638	Roc1a	11.7317	-0.0696521	0.161151	0.665583	1
FBgn0025639	Hmt4-20	12.0803	0.151608	0.158621	0.339181	1
FBgn0025640	CG13369	8.90425	-0.0908142	0.347107	0.793605	1
FBgn0025641	DAAM	10.1072	-0.015118	0.427313	0.971777	1
FBgn0025642	CG32812	3.15509	0.765432	0.655341	0.242811	1
FBgn0025643	CG3588	3.61186	-0.412426	0.856631	0.630196	1
FBgn0025644	CG14424	2.25768	2.54699	1.60952	0.113546	1
FBgn0025674	CycK	10.6711	-0.0531609	0.139732	0.703611	1
FBgn0025676	CkIIalpha-i3	8.0052	-0.0260106	0.198103	0.895539	1
FBgn0025678	CaBP1	12.9085	0.0252748	0.13262	0.848855	1
FBgn0025680	cry	6.75807	0.0581958	1.45307	0.968053	1
FBgn0025681	CG3558	10.8177	0.0855835	0.160949	0.594905	1
FBgn0025682	scf	10.8873	-0.0132921	0.136781	0.922585	1
FBgn0025683	CG3164	12.1294	-0.143436	0.262789	0.585188	1
FBgn0025684	MFS18	9.06967	0.00533393	0.336451	0.987351	1
FBgn0025686	Amnionless	1.45784	-1.89116	1.43808	0.188489	1
FBgn0025692	Lfg	2.8909	0.85632	0.615814	0.164362	1
FBgn0025693	ZnT41F	8.60103	-0.0748406	0.463665	0.87177	1
FBgn0025697	santa-maria	4.30082	2.13673	1.32934	0.107974	1
FBgn0025700	CG5885	12.3118	0.0786822	0.212617	0.711334	1
FBgn0025702	Srpk79D	6.14624	-0.125051	0.291497	0.667927	1
FBgn0025709	CNT2	4.27506	0.289081	0.40498	0.475341	1
FBgn0025712	CG13920	5.03357	-0.225321	0.256346	0.379417	1
FBgn0025716	Bap55	10.7302	0.0316228	0.256153	0.901748	1
FBgn0025720	Ate1	10.0405	-0.052462	0.282722	0.852789	1
FBgn0025724	beta'COP	12.0921	0.0699996	0.136568	0.608257	1
FBgn0025725	alphaCOP	12.3318	0.0800081	0.151822	0.598204	1
FBgn0025726	unc-13	12.2692	-0.0519928	0.396262	0.895611	1
FBgn0025739	pon	9.86445	0.130823	0.131381	0.319373	1
FBgn0025740	PlexB	9.62221	0.150537	0.751138	0.841158	1
FBgn0025741	PlexA	11.586	0.0633275	0.954253	NA	NA
FBgn0025742	mtm	10.3418	0.151038	0.207747	0.467208	1
FBgn0025743	mbt	10.941	0.151951	0.204112	0.456603	1
FBgn0025777	homer	10.712	-0.0320182	0.319535	0.920184	1
FBgn0025781	Cdc16	9.1224	-0.00994281	0.489882	0.983807	1
FBgn0025790	TBPH	11.1877	0.0591966	0.159108	0.709854	1
FBgn0025800	Smox	11.3408	0.0943652	0.247454	0.702947	1
FBgn0025802	Sbf	9.73368	0.208389	0.286484	0.466981	1
FBgn0025807	Rad9	7.79618	0.148857	0.266208	0.576041	1
FBgn0025808	Rad17	7.8253	-0.145759	0.394854	0.712018	1
FBgn0025809	Paf-AHalpha	10.1198	-0.0230436	0.0911113	0.800333	1
FBgn0025814	Mgstl	10.1975	-0.217087	0.236529	0.358723	1
FBgn0025815	Mcm6	10.63	0.267573	0.182334	0.142244	1
FBgn0025820	JTBR	8.53967	-0.0231092	0.237105	0.922358	1
FBgn0025827	CG6421	2.001	0	1.90902	1	1
FBgn0025830	IntS8	9.45826	0.185066	0.206874	0.37101	1
FBgn0025832	Fen1	8.92606	-0.0196334	0.233394	0.93296	1
FBgn0025833	CG8910	4.69108	0.779543	1.4632	0.594196	1
FBgn0025835	CG17707	8.01273	0.790581	0.889289	0.374001	1
FBgn0025836	RhoGAP1A	11.7544	0.170507	0.278625	0.540566	1
FBgn0025837	CG17636	-0.457947	0.604784	1.89079	0.749077	1
FBgn0025839	ND-B14.5A	9.25058	-0.251761	0.424231	0.552878	1
FBgn0025864	Crag	11.8366	0.208164	0.198415	0.294116	1
FBgn0025865	Cortactin	11.5639	0.0247915	0.127365	0.845667	1
FBgn0025866	CalpB	9.68581	0.18092	0.166917	0.278414	1
FBgn0025874	Meics	8.63765	-0.0851199	0.32044	0.790521	1
FBgn0025878	wrapper	7.34639	-0.235773	0.334089	0.480362	1
FBgn0025879	Timp	7.30964	-0.58843	0.395533	0.136833	1
[truncated: 10,012 more rows]

## Sheet: F.DESEQ2_PW_D907_NA_vs_C
Extended Data Table 2F |Differential expression analysis (DESeq2) in D907 non-assimilated vs control in pupal wing.
GENEID	Symbol	log2BaseMean	log2FC	Stderr_log2FC	pvalue	padjust
FBgn0000008	a	12.5082	0.0571385	0.203699	0.77909	1
FBgn0000014	abd-A	3.54541	-0.485741	1.12383	0.66558	1
FBgn0000015	Abd-B	0.161474	0.407279	2.39472	0.864952	1
FBgn0000017	Abl	11.4852	0.0528457	0.23135	0.819317	1
FBgn0000018	abo	8.16282	-0.00246127	0.294851	0.99334	1
FBgn0000022	ac	8.1733	-0.183425	0.586086	0.754306	1
FBgn0000024	Ace	4.50888	-0.293362	0.413633	0.478181	1
FBgn0000028	acj6	2.16252	0.762879	0.707961	0.281225	1
FBgn0000032	Acph-1	8.98686	0.0911951	0.34617	0.792211	1
FBgn0000036	nAChRalpha1	2.0714	-0.0941318	1.6914	0.955618	1
FBgn0000037	mAChR-A	3.06774	-0.284901	0.513979	0.579371	1
FBgn0000038	nAChRbeta1	0.270634	-1.087	1.69664	0.52173	1
FBgn0000039	nAChRalpha2	0.514662	-1.93528	2.31122	0.4024	1
FBgn0000042	Act5C	16.1769	-0.0789762	0.126349	0.531929	1
FBgn0000043	Act42A	14.7455	0.128861	0.208248	0.536056	1
FBgn0000044	Act57B	8.56161	-0.700869	0.522678	0.179947	1
FBgn0000045	Act79B	2.91455	-0.176685	0.898941	0.844181	1
FBgn0000046	Act87E	9.12651	-0.730024	0.517193	0.158094	1
FBgn0000047	Act88F	7.48719	-0.907297	0.554235	0.101625	1
FBgn0000052	Pfas	10.7093	-0.0586417	0.154777	0.704778	1
FBgn0000053	Gart	10.7954	0.146366	0.227274	0.519569	1
FBgn0000055	Adh	-1.43097	0	5.20164	1	1
FBgn0000057	adp	9.38864	0.0427298	0.14545	0.768928	1
FBgn0000061	al	10.5103	0.146962	0.281082	0.601083	1
FBgn0000063	Mps1	8.067	0.23765	0.303338	0.433362	1
FBgn0000064	Ald1	12.216	-0.0170286	0.298989	0.954582	1
FBgn0000071	Ama	11.4544	-0.17268	0.224656	0.442108	1
FBgn0000075	amd	8.86571	0.284963	0.208596	0.171907	1
FBgn0000077	amx	7.46143	-0.080468	0.312931	0.797068	1
FBgn0000078	Amy-d	0.235729	-0.815477	2.44079	0.738302	1
FBgn0000079	Amy-p	0.223185	-2.60261	1.92641	0.176691	1
FBgn0000083	AnxB9	12.028	-0.02191	0.187719	0.907084	1
FBgn0000084	AnxB10	8.22781	0.14822	0.312197	0.634956	1
FBgn0000092	dyw	3.96892	-1.39251	0.450319	0.00198633	1
FBgn0000097	aop	11.9838	-0.0401592	0.231828	0.862472	1
FBgn0000100	RpLP0	15.4776	-0.0401163	0.248356	0.871678	1
FBgn0000108	Appl	9.49263	-0.0153137	0.283377	0.956903	1
FBgn0000109	Aprt	7.92934	0.061378	0.542929	0.909991	1
FBgn0000114	bru1	6.61006	-0.978692	0.554627	0.0776316	1
FBgn0000115	Arl1	10.1262	0.1015	0.0944048	0.282306	1
FBgn0000116	Argk	13.4026	-0.33448	0.227893	0.142184	1
FBgn0000117	arm	14.6646	0.0650849	0.133455	0.625768	1
FBgn0000119	arr	12.3442	0.0382325	0.156099	0.806515	1
FBgn0000120	Arr1	-1.16408	1.36634	2.83793	0.630192	1
FBgn0000121	Arr2	4.10363	0.171482	0.492784	0.727851	1
FBgn0000137	ase	4.17788	-1.00661	0.84511	0.233617	1
FBgn0000139	ash2	9.72679	0.0215453	0.221804	0.922618	1
FBgn0000140	asp	9.90051	0.028473	0.270945	0.916306	1
FBgn0000146	aub	3.32083	-0.691827	0.523919	0.186673	1
FBgn0000147	aurA	8.68677	0.0236499	0.266653	0.929327	1
FBgn0000150	awd	14.514	0.0215307	0.348898	0.950793	1
FBgn0000152	Axs	9.11858	0.12446	0.33584	0.710941	1
FBgn0000153	b	4.35572	0.339099	0.731496	0.642956	1
FBgn0000157	Dll	11.0699	0.0710577	0.322413	0.825565	1
FBgn0000158	bam	2.79957	0.0958776	0.748253	0.898042	1
FBgn0000163	baz	11.0637	0.156367	0.217502	0.47219	1
FBgn0000173	ben	12.0376	0.0993882	0.0499397	0.046573	1
FBgn0000179	bi	11.1907	0.015904	0.315118	0.959748	1
FBgn0000180	bib	10.0409	-0.250568	0.318066	0.430821	1
FBgn0000181	bic	14.2884	0.01926	0.232717	0.934041	1
FBgn0000183	BicD	11.2121	-0.036526	0.176385	0.835946	1
FBgn0000206	boss	5.24447	-0.0471777	0.383045	0.901976	1
FBgn0000212	brm	12.4185	0.0329666	0.136903	0.809709	1
FBgn0000216	Brd	6.98789	-0.214207	0.466036	0.645778	1
FBgn0000221	brn	7.72859	-0.148101	0.213135	0.487138	1
FBgn0000228	Bsg25D	10.0976	0.0580304	0.157265	0.71213	1
FBgn0000229	bsk	9.60373	-0.738333	0.984822	0.453428	1
FBgn0000233	btd	4.62465	-1.05227	0.868453	0.225644	1
FBgn0000239	bur	10.8472	0.0856097	0.347575	0.805446	1
FBgn0000241	bw	1.20565	0.332699	0.937321	0.72263	1
FBgn0000244	by	9.18267	-0.0977324	0.178039	0.583048	1
FBgn0000246	c(3)G	6.7144	-1.11579	0.676222	0.0989358	1
FBgn0000247	ca	10.5521	0.0111368	0.18184	0.951164	1
FBgn0000250	cact	11.2922	-0.0153512	0.169649	0.927899	1
FBgn0000251	cad	-1.16213	1.55069	3.19747	0.627696	1
FBgn0000253	Cam	13.2495	0.0351771	0.244787	0.885734	1
FBgn0000256	capu	11.4909	-0.00305545	0.202595	0.987967	1
FBgn0000257	car	8.91041	0.0694292	0.25876	0.788457	1
FBgn0000259	CkIIbeta	11.4756	-0.167942	0.311449	0.58973	1
FBgn0000261	Cat	14.2116	0.0787538	0.286514	0.783417	1
FBgn0000273	Pka-C1	10.9166	0.00573003	0.257019	0.982213	1
FBgn0000276	CecA1	-1.12268	-2.10343	2.54146	0.407872	1
FBgn0000278	CecB	-0.92001	0.557761	3.68579	0.879718	1
FBgn0000279	CecC	0.484249	-0.622142	1.60496	0.698284	1
FBgn0000283	Cp190	11.7955	0.144557	0.198739	0.466998	1
FBgn0000286	Cf2	9.43236	-0.0159261	0.300183	0.957688	1
FBgn0000287	salr	11.536	0.193917	0.146411	0.185345	1
FBgn0000289	cg	12.4473	0.0218529	0.110509	0.843242	1
FBgn0000299	Col4a1	10.9813	-0.142192	0.366795	0.698267	1
FBgn0000303	ChAT	1.51051	1.24708	0.801381	0.119669	1
FBgn0000307	chif	10.9703	0.0800676	0.325631	0.805772	1
FBgn0000308	chic	14.3064	-0.00767307	0.284936	0.978516	1
FBgn0000316	cin	10.058	-0.289041	0.729639	0.691999	1
FBgn0000317	ck	11.6734	-0.17324	0.290817	0.551374	1
FBgn0000318	cl	11.0586	-0.0300237	0.14666	0.837793	1
FBgn0000319	Chc	13.6819	-0.0159236	0.17651	0.928117	1
FBgn0000320	eya	8.04145	-0.907249	0.556537	0.103066	1
FBgn0000326	clt	8.55744	0.0566911	0.356023	0.873484	1
FBgn0000330	cm	9.97901	0.073285	0.294328	0.803368	1
FBgn0000337	cn	0.268373	-1.83215	2.19185	0.403216	1
FBgn0000339	cni	9.33396	-0.829807	1.05845	0.433049	1
FBgn0000346	comt	7.87932	0.179806	0.191291	0.347238	1
FBgn0000351	cort	6.22092	0.318631	0.318642	0.317326	1
FBgn0000352	cos	10.664	0.212479	0.123616	0.085638	1
FBgn0000357	Cp18	2.26944	-0.156786	0.785289	0.841751	1
FBgn0000359	Cp36	-1.09841	-0.629673	3.8853	0.871254	1
FBgn0000370	crc	11.8562	-0.653979	0.920093	0.477224	1
FBgn0000376	crm	9.59012	0.161133	0.179662	0.369789	1
FBgn0000377	crn	10.1282	0.0468669	0.115487	0.684874	1
FBgn0000382	csw	10.8077	-0.0539517	0.315991	0.86443	1
FBgn0000384	cta	9.56275	-0.458992	0.18391	0.0125696	1
FBgn0000394	cv	10.5618	0.0245678	0.158534	0.876846	1
FBgn0000395	cv-2	10.5947	-0.0341868	0.262413	0.896346	1
FBgn0000404	CycA	11.6284	0.053348	0.353287	0.879972	1
FBgn0000405	CycB	11.6259	0.0721043	0.121489	0.552843	1
FBgn0000406	Cyt-b5-r	5.2982	0.274855	2.10758	0.89624	1
FBgn0000411	D	1.5355	0.22355	1.20066	0.852297	1
FBgn0000412	D1	13.5891	0.0687747	0.256973	0.788982	1
FBgn0000414	Dab	11.1883	0.0189683	0.182605	0.917268	1
FBgn0000416	Sap-r	13.1179	0.0116028	0.181856	0.949128	1
FBgn0000422	Ddc	4.37445	0.0506009	0.624802	0.935452	1
FBgn0000426	SmF	10.3072	0.118442	0.356307	0.739575	1
FBgn0000439	Dfd	1.0971	-0.17515	2.23457	0.937524	1
FBgn0000442	Pkg21D	4.56965	-0.384732	0.665554	0.563222	1
FBgn0000447	Dhod	10.7814	-0.0904538	0.100445	0.36784	1
FBgn0000448	Hr3	4.10494	-2.91325	1.84912	0.115146	1
FBgn0000449	dib	3.05652	-1.47929	1.0718	0.167528	1
FBgn0000451	ect	9.95842	-0.123409	0.32376	0.703075	1
FBgn0000454	Dip-B	11.6758	-0.322946	0.309921	0.2974	1
FBgn0000455	Dip-C	9.61828	0.229778	0.130585	0.0784743	1
FBgn0000459	disco	7.46986	-0.244536	0.299195	0.41375	1
FBgn0000463	Dl	11.501	0.0999838	0.207346	0.629658	1
FBgn0000464	Lar	7.2388	-0.395472	0.299766	0.187079	1
FBgn0000473	Cyp6a2	4.53412	0.120868	1.23337	0.921934	1
FBgn0000477	DNaseII	5.02373	-0.804773	1.50573	0.593013	1
FBgn0000479	dnc	9.6958	-0.141529	0.289245	0.624626	1
FBgn0000482	dor	9.87823	0.0484414	0.133907	0.717536	1
FBgn0000489	Pka-C3	8.22442	-0.152479	0.486602	0.754011	1
FBgn0000490	dpp	10.6253	-0.0386455	0.251388	0.877824	1
FBgn0000492	Dr	11.2215	0.0976653	0.266099	0.7136	1
FBgn0000499	dsh	10.6754	0.0771427	0.152738	0.613512	1
FBgn0000500	Dsk	3.99865	-0.217363	1.03808	0.834144	1
FBgn0000504	dsx	10.1355	-0.173619	0.251572	0.490107	1
FBgn0000520	dwg	9.44223	0.0798565	0.250891	0.750264	1
FBgn0000524	dx	11.5684	-0.012407	0.188176	0.947431	1
FBgn0000527	e	8.53797	-1.12546	0.798875	0.158891	1
FBgn0000533	ea	8.27345	0.108098	0.353343	0.759659	1
FBgn0000535	eag	1.29961	-1.21866	0.906363	0.178769	1
FBgn0000536	eas	9.98281	-0.177151	0.321328	0.581422	1
FBgn0000541	E(bx)	12.0664	-0.3926	0.415891	0.34517	1
FBgn0000542	ec	13.2154	0.0309326	0.199227	0.876614	1
FBgn0000543	ecd	10.3592	0.203849	0.145543	0.161331	1
FBgn0000546	EcR	11.3825	0.099558	0.222715	0.65486	1
FBgn0000547	ed	14.1759	0.107088	0.122104	0.380475	1
FBgn0000551	Edg78E	3.49525	-0.317116	1.00246	0.751746	1
FBgn0000552	Edg84A	-0.343901	-1.58065	2.72463	0.561823	1
FBgn0000557	eEF1alpha2	10.7252	-0.517119	0.696145	0.457583	1
FBgn0000559	eEF2	16.624	0.00285229	0.148984	0.984725	1
FBgn0000560	eg	7.91871	0.0816432	0.297647	0.783858	1
FBgn0000562	egl	11.2869	0.0361438	0.179986	0.840844	1
FBgn0000565	MsrA	10.4064	0.036289	0.15362	0.813257	1
FBgn0000566	Eip55E	10.2507	0.18795	0.189682	0.321748	1
FBgn0000567	Eip74EF	12.0442	-0.240661	0.409696	0.556926	1
FBgn0000568	Eip75B	12.8693	0.0321819	0.348106	0.926342	1
FBgn0000575	emc	12.771	-0.0931951	0.412864	NA	NA
FBgn0000576	ems	9.84845	-0.0379423	0.262644	0.885135	1
FBgn0000577	en	10.8604	0.0533514	0.248152	0.829771	1
FBgn0000578	ena	12.9678	0.0590938	0.224711	0.792568	1
FBgn0000579	Eno	13.0769	-0.00835645	0.281017	0.976277	1
FBgn0000581	E(Pc)	11.8884	0.082256	0.238299	0.72996	1
FBgn0000588	esc	7.87526	-0.498605	0.402669	0.215624	1
FBgn0000591	E(spl)m8-HLH	7.70229	0.917725	0.621514	0.139784	1
FBgn0000592	Est-6	1.75108	0	2.39511	NA	NA
FBgn0000594	Est-P	3.72561	0.716507	1.17129	0.54072	1
FBgn0000611	exd	12.3551	0.0973247	0.212633	0.64716	1
FBgn0000615	exu	4.00786	-0.122205	0.450705	0.786281	1
FBgn0000617	e(y)1	9.49911	0.0846185	0.285689	0.767084	1
FBgn0000618	e(y)2	8.7349	-0.00284535	0.309858	0.992673	1
FBgn0000625	eyg	9.13554	0.0268067	0.342819	0.937673	1
FBgn0000629	E(z)	9.78433	0.0867914	0.337189	0.796873	1
FBgn0000633	CG17716	4.11325	-0.600295	0.697237	0.389258	1
FBgn0000635	Fas2	12.324	-0.0311219	0.133796	0.816066	1
FBgn0000636	Fas3	13.4312	0.0404988	0.125416	0.746759	1
FBgn0000639	Fbp1	12.8779	-0.404475	1.01149	0.689245	1
FBgn0000640	Fbp2	11.2776	-0.278337	1.28492	0.828506	1
FBgn0000644	Fcp3C	6.28488	-0.150146	0.524434	0.774648	1
FBgn0000658	fj	12.3458	0.174957	0.168312	0.298581	1
FBgn0000659	fkh	3.7818	-0.261628	0.880893	0.766464	1
FBgn0000662	fl(2)d	11.3682	0.0734974	0.179371	0.681989	1
FBgn0000667	Actn	12.0811	-0.298879	0.214507	0.16352	1
FBgn0000709	fliI	10.1841	0.0559089	0.187317	0.765342	1
FBgn0000711	flw	10.3497	-0.0584579	0.132766	0.659714	1
FBgn0000719	fog	9.0511	-0.182127	0.313391	0.561139	1
FBgn0000721	for	11.0094	-0.0511868	0.146652	0.727063	1
FBgn0000723	FER	11.4746	0.23776	0.267362	0.373852	1
FBgn0000808	gd	0.594464	1.94643	1.8186	0.284487	1
FBgn0000810	fs(1)K10	9.53715	-0.0392503	0.0801546	0.624359	1
FBgn0000826	png	4.02019	-0.210294	0.522069	0.687089	1
FBgn0000927	fs(1)Ya	2.79337	0.643034	0.615795	0.296377	1
FBgn0000928	fs(1)Yb	3.3155	-0.0865457	0.903516	0.923689	1
FBgn0000996	dup	9.71467	0.0738177	0.18222	0.685402	1
FBgn0001075	ft	13.0076	-0.148867	0.274993	0.588267	1
FBgn0001078	ftz-f1	7.29306	-0.38526	0.704178	0.584306	1
FBgn0001079	fu	9.60463	0.139629	0.140059	0.318799	1
FBgn0001083	fw	10.5026	-0.0118039	0.18121	0.948063	1
FBgn0001084	fy	9.29983	-0.0163443	0.287837	0.954718	1
FBgn0001085	fz	11.3015	0.0505771	0.231997	0.827423	1
FBgn0001086	fzy	10.3743	0.107689	0.466428	0.817408	1
FBgn0001087	g	10.854	-0.110557	0.131697	0.4012	1
FBgn0001089	Gal	10.1306	-0.135503	0.754789	0.857526	1
FBgn0001090	bnb	19.6371	0.193203	0.42233	0.647333	1
FBgn0001091	Gapdh1	11.9762	0.027736	0.241352	0.908509	1
FBgn0001092	Gapdh2	12.9744	0.00920568	0.149908	0.951034	1
FBgn0001098	Gdh	12.6996	0.134561	0.274314	0.623755	1
FBgn0001099	gdl	4.27269	-0.126711	0.481218	0.79231	1
FBgn0001104	Galphai	11.8348	-0.133178	0.245527	0.58753	1
FBgn0001105	Gbeta13F	12.4649	0.0144868	0.248709	0.953551	1
FBgn0001108	DCTN1-p150	10.96	0.0491846	0.147589	0.738943	1
FBgn0001112	Gld	9.16421	-0.61091	0.339876	0.0722646	1
FBgn0001114	Glt	11.5477	0.0615176	0.321262	0.848144	1
FBgn0001120	gnu	-0.741383	-0.0941317	2.24372	0.966536	1
FBgn0001122	Galphao	9.69085	-0.120031	0.24241	0.62049	1
FBgn0001123	Galphas	11.1289	0.0456222	0.24262	0.850845	1
FBgn0001124	Got1	11.2117	0.0583636	0.345856	0.865992	1
FBgn0001125	Got2	10.8879	0.0438364	0.186848	0.814512	1
FBgn0001128	Gpdh1	8.53752	-0.0805336	0.14899	0.588831	1
FBgn0001133	grau	9.06305	0.0987515	0.267526	0.712032	1
FBgn0001134	Grd	0.501322	1.66606	1.36734	0.223045	1
FBgn0001137	grk	3.80696	-0.488386	0.57072	0.392144	1
FBgn0001138	grn	10.7993	-0.129208	0.349919	0.71194	1
FBgn0001139	gro	12.3221	0.108871	0.208282	0.601177	1
FBgn0001142	Gs1	9.40105	-0.154085	0.713709	0.829071	1
FBgn0001145	Gs2	7.32335	-0.37289	0.350358	0.287187	1
FBgn0001147	gsb-n	2.41312	-0.720602	1.09193	0.509296	1
FBgn0001148	gsb	2.24677	-0.148492	1.3514	0.912504	1
FBgn0001149	GstD1	14.1395	0.0572815	0.26537	0.8291	1
FBgn0001150	gt	5.42354	-0.617068	0.27017	0.0223717	1
FBgn0001168	h	9.45798	-0.231254	0.290278	0.425646	1
FBgn0001169	H	11.3279	0.0940936	0.276041	0.733203	1
FBgn0001170	H2.0	4.99778	-0.428886	0.650178	0.509482	1
FBgn0001174	halo	-0.290952	0.712934	2.31784	0.758398	1
FBgn0001179	hay	9.24287	0.158649	0.146229	0.27795	1
FBgn0001180	hb	2.08171	-1.58272	1.30447	0.225015	1
FBgn0001185	her	9.1758	-0.0034101	0.274903	0.990103	1
FBgn0001186	Hex-A	10.5408	-0.268056	0.118825	0.0240779	1
FBgn0001187	Hex-C	-0.00814323	1.07263	1.71013	0.530514	1
FBgn0001189	hfw	10.3723	0.0576404	0.177775	0.745762	1
FBgn0001197	His2Av	12.7412	0.0700934	0.181223	0.698919	1
FBgn0001202	hook	9.70643	0.0282823	0.136522	0.835883	1
FBgn0001206	Hmr	9.43568	0.0936731	0.234003	0.688931	1
FBgn0001208	Hn	7.07876	-0.107924	0.917607	0.906373	1
FBgn0001215	Hrb98DE	13.2374	0.0043297	0.0683661	0.949503	1
FBgn0001216	Hsc70-1	1.14731	-0.841156	1.09485	0.442317	1
FBgn0001217	Hsc70-2	2.20603	-0.152629	0.804555	0.849539	1
FBgn0001218	Hsc70-3	14.7337	0.0159098	0.281811	0.954979	1
FBgn0001220	Hsc70-5	11.6742	-0.0982212	0.133833	0.463004	1
FBgn0001222	Hsf	10.7147	0.0200318	0.318237	0.949809	1
FBgn0001224	Hsp23	15.393	-0.0357713	0.265789	0.89294	1
FBgn0001225	Hsp26	12.7386	-0.277694	0.520552	0.593715	1
FBgn0001226	Hsp27	15.9923	0.209092	0.33506	0.532599	1
FBgn0001227	Hsp67Ba	13.4332	0.0947611	0.241074	0.694262	1
FBgn0001228	CG4456	1.05183	-0.445021	1.51426	0.768844	1
FBgn0001229	Hsp67Bc	6.67145	-0.182316	0.753591	0.808834	1
FBgn0001230	Hsp68	8.19001	-0.706492	0.76369	0.354913	1
FBgn0001233	Hsp83	14.7407	-0.788877	0.232273	0.000682939	0.552647
FBgn0001234	lncRNA:Hsromega	10.4432	0.513941	0.481965	0.286267	1
FBgn0001235	hth	12.4616	-0.0905328	0.311213	0.771126	1
FBgn0001247	Ide	10.3409	-0.148411	0.449143	0.741074	1
FBgn0001248	Idh	13.387	0.0851959	0.0929092	0.359153	1
FBgn0001250	if	11.3236	0.0938144	0.218594	0.667798	1
FBgn0001253	ImpE1	11.8999	-0.388457	0.684813	0.570548	1
FBgn0001254	ImpE2	17.6025	0.0401756	0.592427	0.945933	1
FBgn0001255	ImpE3	10.2702	-0.130948	0.630427	0.835453	1
FBgn0001256	ImpL1	10.5067	-0.089164	0.645671	0.890165	1
FBgn0001257	ImpL2	7.78052	-0.244239	0.824114	NA	NA
FBgn0001258	Ldh	7.30256	0.00681129	0.510392	0.989352	1
FBgn0001259	in	10.3767	-0.0196109	0.153328	0.898227	1
FBgn0001263	inaD	4.7339	-0.257059	0.273832	0.34786	1
FBgn0001269	inv	11.0263	0.0965162	0.206143	0.639641	1
FBgn0001276	ix	8.59441	0.128734	0.365603	0.724753	1
FBgn0001280	janA	10.5886	0.0421794	0.307843	0.891018	1
FBgn0001281	janB	-0.563137	0	2.33463	1	1
FBgn0001285	Jon44E	-0.932772	0	3.90969	1	1
FBgn0001291	Jra	10.0339	0.0322809	0.204633	0.874654	1
FBgn0001296	kar	9.18239	-0.0182646	0.257898	0.94354	1
FBgn0001297	kay	10.5246	-0.121603	0.341074	0.721444	1
FBgn0001301	kel	10.8104	-0.0189435	0.117087	0.871472	1
FBgn0001308	Khc	12.3588	0.016375	0.114063	0.885847	1
FBgn0001311	kkv	13.2338	-0.0471579	0.16887	0.780049	1
FBgn0001316	klar	13.9596	-0.0389485	0.180542	0.829198	1
FBgn0001319	kn	10.6356	0.0902579	0.259791	0.728272	1
FBgn0001320	kni	9.15559	-0.0977584	0.331229	0.767888	1
FBgn0001321	knk	10.2105	-0.116393	0.536283	0.828181	1
FBgn0001323	knrl	8.21454	-0.222439	0.305072	0.465919	1
FBgn0001324	kto	11.5518	-0.030102	0.231167	0.896394	1
FBgn0001325	Kr	3.10068	0.632299	1.89403	0.738502	1
FBgn0001330	kz	8.82968	0.168522	0.366958	0.646062	1
FBgn0001341	Mybbp1A	9.79443	0.0658199	0.204211	0.747216	1
FBgn0001404	egh	9.59484	0.0884967	0.178909	0.62085	1
FBgn0001491	l(1)10Bb	9.26891	0.0718592	0.214349	0.737441	1
FBgn0001565	Hlc	10.5993	0.086081	0.250323	0.730937	1
FBgn0001612	Grip91	9.36058	-0.087801	0.458755	0.84822	1
FBgn0001624	dlg1	11.5425	-0.00609951	0.112979	0.956945	1
FBgn0001941	ifc	9.5039	0.0500359	0.10006	0.617033	1
FBgn0001942	eIF4A	15.5877	-0.00342135	0.168657	0.983815	1
FBgn0001961	Arpc1	11.275	0.00396629	0.190637	0.983401	1
FBgn0001965	Sos	11.016	0.046458	0.205156	0.82085	1
FBgn0001967	NimC3	8.51843	-0.0697419	0.636934	0.912809	1
FBgn0001970	Pgant35A	10.0091	0.0832112	0.248444	0.737679	1
FBgn0001977	CIAPIN1	10.2698	0.0449387	0.224806	0.841559	1
FBgn0001978	stc	10.9181	0.051002	0.174937	0.770634	1
FBgn0001981	esg	9.75652	-0.00395363	0.162774	0.980622	1
FBgn0001983	wor	1.53798	-2.09929	1.25723	0.0949646	1
FBgn0001986	Mtr4	9.92313	0.122679	0.273465	0.653714	1
FBgn0001987	Gli	12.1422	0.00350623	0.214231	0.986942	1
FBgn0001989	ND-B17	10.5112	0.00542061	0.397834	0.989129	1
FBgn0001990	wek	8.45206	0.141003	0.251756	0.575427	1
FBgn0001991	Ca-alpha1D	3.71858	-1.12375	0.554882	0.0428468	1
FBgn0001992	Cyp303a1	2.31698	-0.342545	0.722938	0.635625	1
FBgn0001994	crp	12.0417	-0.0605293	0.131207	0.644565	1
FBgn0001995	mRpL4	9.07588	0.040491	0.322402	0.900055	1
FBgn0002021	l(2)37Bb	8.45923	0.244412	0.51929	0.637879	1
FBgn0002022	Catsup	11.1559	0.0468765	0.110052	0.670146	1
FBgn0002023	Lim3	0.0291261	0.088335	1.51302	0.953443	1
FBgn0002031	l(2)37Cc	11.5317	0.0449599	0.195803	0.818389	1
FBgn0002036	CG10561	6.79333	0.0789366	0.184991	0.669594	1
FBgn0002044	swm	11.3503	-0.0123498	0.197067	0.950031	1
FBgn0002069	AspRS	11.9113	0.0583579	0.247462	0.813568	1
FBgn0002121	l(2)gl	11.6555	-0.382298	0.450388	0.395981	1
FBgn0002174	CG5504	10.3957	-0.0146152	0.371632	0.96863	1
FBgn0002183	dre4	12.1584	0.128739	0.177834	0.469112	1
FBgn0002283	l(3)73Ah	9.38592	-0.0297388	0.170969	0.86191	1
FBgn0002284	Prosbeta6	11.3948	0.0492125	0.216811	0.820437	1
FBgn0002306	sas	12.7305	-0.0212071	0.135148	0.875309	1
FBgn0002354	l(3)87Df	6.1042	-0.432386	0.348549	0.214779	1
FBgn0002413	dco	12.0235	-0.037675	0.160076	0.813932	1
FBgn0002431	hyd	12.1602	-0.14069	0.254701	0.580693	1
FBgn0002440	l(3)mbn	0.165111	0	4.19756	1	1
FBgn0002441	l(3)mbt	10.3238	0.0791504	0.157912	0.616207	1
FBgn0002466	sti	10.6544	-0.161071	0.357322	0.652153	1
FBgn0002521	pho	10.1908	-0.806491	0.839689	NA	NA
FBgn0002522	lab	2.09067	0.61781	1.21538	0.611225	1
FBgn0002524	lace	9.60295	0.0769019	0.119461	0.519744	1
FBgn0002525	Lam	13.5119	0.0585043	0.22317	0.793205	1
FBgn0002526	LanA	12.3348	-0.191126	0.349965	0.584978	1
FBgn0002531	Lcp1	7.31907	-1.69257	1.82224	0.352972	1
FBgn0002533	Lcp2	5.92506	0	1.72011	1	1
FBgn0002534	Lcp3	4.97161	-2.78758	2.25787	0.216977	1
FBgn0002535	Lcp4	7.11714	-0.815478	2.01549	0.685768	1
FBgn0002542	lds	10.4215	0.145342	0.303429	0.631939	1
FBgn0002543	robo2	12.607	0.0849355	0.295371	0.773687	1
FBgn0002552	lin	10.3607	0.0927035	0.165943	0.576402	1
FBgn0002561	l(1)sc	0.489257	-0.0941318	1.7578	0.957293	1
FBgn0002562	Lsp1alpha	12.1246	0.619469	1.80624	0.731628	1
FBgn0002563	Lsp1beta	12.6398	-0.0818178	1.42844	0.954324	1
FBgn0002564	Lsp1gamma	12.4085	-0.259372	1.6512	0.875181	1
FBgn0002565	Lsp2	12.2479	-0.228523	1.31197	0.861722	1
FBgn0002566	lt	9.90406	-0.954652	0.824911	NA	NA
FBgn0002567	Rab32	8.1688	-0.10885	0.287689	0.705161	1
FBgn0002569	Mal-A2	0.3007	-0.0922542	5.11216	0.985602	1
FBgn0002573	sens	6.25471	-0.132139	0.483197	0.784493	1
FBgn0002576	lz	1.62061	0.854063	1.3523	0.527671	1
FBgn0002577	m	11.1126	-1.10325	0.78761	0.161288	1
FBgn0002578	Kaz-m1	-0.580555	-0.301834	2.46657	0.902606	1
FBgn0002579	RpL36	14.7502	-0.0199188	0.145392	0.89103	1
FBgn0002590	RpS5a	15.5798	0.0221044	0.198389	0.911283	1
FBgn0002592	E(spl)m2-BFM	9.6288	-0.091943	0.411635	0.823255	1
FBgn0002593	RpLP1	15.4371	-0.074905	0.330596	0.820754	1
FBgn0002609	E(spl)m3-HLH	9.74452	-0.256164	0.147463	0.0823615	1
FBgn0002622	RpS3	15.3416	-0.0241864	0.210968	0.908727	1
FBgn0002626	RpL32	14.8756	-0.0460113	0.281011	0.86994	1
FBgn0002629	E(spl)m4-BFM	8.05358	0.319304	0.805744	0.691895	1
FBgn0002631	E(spl)m5-HLH	3.52943	0.938384	0.61684	0.128191	1
FBgn0002632	E(spl)m6-BFM	7.23778	-1.19339	0.7193	0.0970949	1
FBgn0002633	E(spl)m7-HLH	8.99438	-0.321964	0.274827	0.241392	1
FBgn0002638	Rcc1	11.0973	0.0462354	0.205643	0.822109	1
FBgn0002641	mal	8.66394	0.210128	0.183171	0.251313	1
FBgn0002643	mam	12.5278	-0.106498	0.359974	0.767347	1
FBgn0002645	Map205	12.2799	-0.158593	0.245411	0.518128	1
FBgn0002673	twe	5.93093	0.0285422	0.447815	0.94918	1
FBgn0002707	mei-9	8.77526	0.159865	0.196072	0.414878	1
FBgn0002709	mei-218	4.82681	-0.680144	1.31838	0.605929	1
FBgn0002715	mei-S332	7.97826	-0.0132105	0.171373	0.938555	1
FBgn0002716	mei-W68	3.36953	0.108657	0.461512	0.81387	1
FBgn0002719	Men	10.2455	-0.102759	0.233318	0.659629	1
FBgn0002723	Met	8.6996	-0.0963547	0.239118	0.686979	1
FBgn0002732	E(spl)malpha-BFM	10.3077	-0.0662003	0.285056	0.816355	1
FBgn0002733	E(spl)mbeta-HLH	11.3702	-0.0469297	0.227918	0.836864	1
FBgn0002734	E(spl)mdelta-HLH	8.35655	0.0109194	0.147413	0.940952	1
FBgn0002735	E(spl)mgamma-HLH	5.90418	-0.24486	0.25528	0.337468	1
FBgn0002736	mago	10.3373	0.0718974	0.354133	0.839117	1
FBgn0002772	Mlc1	5.13657	-1.82486	1.05031	0.0823074	1
FBgn0002773	Mlc2	6.9856	-1.45618	0.699235	0.0372933	1
FBgn0002774	mle	11.2188	0.0560166	0.26089	0.829991	1
FBgn0002775	msl-3	9.06412	0.0812154	0.121042	0.502241	1
FBgn0002778	mnd	9.11977	0.111477	0.202205	0.581422	1
FBgn0002780	mod	12.5464	-0.259192	0.736986	0.725069	1
FBgn0002781	mod(mdg4)	13.2347	0.082855	0.24797	0.738279	1
FBgn0002783	mor	12.5508	0.143384	0.122048	0.240068	1
FBgn0002787	Rpn8	11.5013	0.0863946	0.156711	0.581428	1
FBgn0002789	Mp20	4.31771	-0.035908	1.31392	0.978198	1
FBgn0002791	mr	9.44752	-0.0465509	0.455209	0.918548	1
FBgn0002838	ms(3)K81	-0.700574	2.13812	2.69376	0.427351	1
FBgn0002862	Mst87F	0.222351	0.200567	1.37983	0.884429	1
FBgn0002863	Acp95EF	1.98453	-0.625826	1.30038	0.63033	1
FBgn0002868	MtnA	6.35068	0.219355	0.93986	0.815458	1
FBgn0002869	MtnB	6.71781	4.65402	2.55987	NA	NA
FBgn0002872	mu2	9.3109	-0.0578032	0.342807	0.866098	1
FBgn0002873	mud	10.164	-0.0709062	0.242833	0.77029	1
FBgn0002878	mus101	8.70763	0.199635	0.178008	0.262076	1
FBgn0002887	mus201	8.41714	0.093413	0.204678	0.648109	1
FBgn0002891	DNApol-zeta	7.63889	0.233506	0.295485	0.429383	1
FBgn0002899	mus301	7.98611	0.180083	0.27303	0.509528	1
FBgn0002901	mus304	7.76572	-0.0131292	0.370623	0.971741	1
FBgn0002905	DNApol-theta	8.70796	0.165641	0.175378	0.344926	1
FBgn0002906	Blm	9.32616	0.336321	0.366299	0.358536	1
FBgn0002917	na	5.78345	-0.0134436	0.352457	0.969574	1
FBgn0002921	Atpalpha	13.6786	0.0411006	0.119821	0.731586	1
FBgn0002922	nau	3.33628	0.0587272	0.715651	0.934598	1
FBgn0002924	ncd	10.4433	0.12139	0.195266	0.534163	1
FBgn0002930	nec	7.76742	-0.122352	0.726105	0.866187	1
FBgn0002931	net	8.16462	0.102967	0.173381	0.552595	1
FBgn0002932	neur	9.58633	-0.0902976	0.214452	0.673711	1
FBgn0002936	ninaA	0.383144	-0.387738	1.51372	0.797836	1
FBgn0002938	ninaC	4.77894	-0.125003	0.519657	0.809905	1
FBgn0002939	ninaD	2.50796	-0.35986	1.26273	0.775655	1
FBgn0002941	slou	0.371255	-3.25928	1.46413	0.0260089	1
FBgn0002945	nkd	12.143	-0.0100335	0.296797	0.973032	1
FBgn0002948	nod	8.95017	0.123192	0.20603	0.549886	1
FBgn0002962	nos	2.29879	-0.317577	0.670553	0.635781	1
FBgn0002973	numb	12.6111	0.0752579	0.240478	0.754318	1
FBgn0002985	odd	7.13659	-0.586876	0.438754	0.181028	1
FBgn0002989	okr	7.8972	-0.13355	0.196189	0.496049	1
FBgn0003002	opa	9.00225	-0.0549683	0.307568	0.858158	1
FBgn0003008	or	8.82857	-0.142373	0.521797	0.784967	1
FBgn0003016	osp	11.0743	-0.00733139	0.202495	0.971119	1
FBgn0003023	otu	1.77263	0.548649	0.777853	0.4806	1
FBgn0003028	ovo	12.7015	-0.231186	0.229991	0.314801	1
FBgn0003041	pbl	10.1517	0.0927568	0.255507	0.716582	1
FBgn0003042	Pc	8.73914	0.0860043	0.252653	0.733552	1
FBgn0003044	Pcl	10.8539	0.0865656	0.124424	0.486596	1
FBgn0003046	Pcp	3.24221	-0.814424	1.06549	0.444649	1
FBgn0003048	pcx	10.9137	0.0418323	0.234628	0.858494	1
FBgn0003053	peb	7.79617	0.0167001	0.298577	0.955396	1
FBgn0003060	CG9757	1.86775	-0.815476	2.82656	0.77296	1
FBgn0003062	Fib	11.6923	0.076361	0.303061	0.801068	1
FBgn0003065	CG2150	7.87585	-0.0828242	0.538844	0.877841	1
FBgn0003068	per	3.95515	-0.77307	0.363607	0.033494	1
FBgn0003071	Pfk	11.0577	0.114335	0.101095	0.258068	1
FBgn0003074	Pgi	10.9128	0.0633788	0.117166	0.588554	1
FBgn0003076	Pgm1	8.71722	-0.229049	0.286398	0.42385	1
FBgn0003079	Raf	9.96824	0.0514358	0.235602	0.827183	1
FBgn0003082	phr	7.70937	0.14747	0.244709	0.546751	1
FBgn0003087	pim	8.77677	-0.691819	0.937395	0.4605	1
FBgn0003089	pip	9.37414	-0.125679	0.556991	0.821482	1
FBgn0003090	pk	12.2393	-0.00158023	0.299641	0.995792	1
FBgn0003091	Pkc53E	3.88457	-0.581631	0.90632	0.521036	1
FBgn0003093	Pkc98E	11.1077	0.0119071	0.160878	0.941	1
FBgn0003116	pn	6.65173	0.430415	0.228041	0.0591001	1
FBgn0003117	pnr	8.73303	-0.179047	0.275989	0.516503	1
FBgn0003118	pnt	9.86779	0.163968	0.160669	0.307476	1
FBgn0003124	polo	11.8751	0.0215632	0.314122	0.945272	1
FBgn0003129	Poxm	2.08733	-1.07428	0.95694	0.261597	1
FBgn0003130	Poxn	8.03113	0.231136	0.113235	0.0412313	1
FBgn0003134	Pp1alpha-96A	10.0321	0.0870506	0.0801762	0.277593	1
FBgn0003137	Ppn	12.516	0.00149611	0.256756	0.995351	1
FBgn0003139	PpV	9.97819	0.0601009	0.128305	0.639483	1
FBgn0003141	pr	9.39484	-0.293479	0.663801	0.658404	1
FBgn0003149	Prm	5.4826	-1.46375	0.850919	0.0853968	1
FBgn0003159	CG2841	9.9351	0.0530332	0.143789	0.712256	1
FBgn0003162	Pu	9.0343	-0.0894568	0.298325	0.764281	1
FBgn0003165	pum	12.8676	-0.212908	0.314543	0.498483	1
FBgn0003169	put	11.4263	0.00954134	0.170386	0.955343	1
FBgn0003174	pwn	12.1092	0.108453	0.252773	0.667885	1
FBgn0003175	px	10.8599	0.0210618	0.295155	0.943112	1
FBgn0003187	qua	8.87564	-0.496973	0.855346	0.561227	1
FBgn0003189	r	11.4291	0.0134026	0.185179	0.942302	1
FBgn0003204	ras	11.3537	0.0945027	0.186954	0.613217	1
FBgn0003205	Ras85D	11.9568	0.0934797	0.205298	0.648867	1
FBgn0003206	Ras64B	10.9043	-0.143035	0.146586	0.329178	1
FBgn0003209	raw	10.05	-0.0279368	0.147515	0.849793	1
FBgn0003210	rb	10.9946	0.106624	0.172831	0.537282	1
FBgn0003218	rdgB	9.62168	-0.0930344	0.254555	0.714754	1
FBgn0003227	rec	7.8134	0.00126485	0.182442	0.994468	1
FBgn0003231	ref(2)P	11.1837	-0.101702	0.0817739	0.213611	1
FBgn0003250	Rh4	0.0303909	-0.815478	1.89393	0.666778	1
FBgn0003254	rib	3.53178	0.272773	0.449708	0.544145	1
FBgn0003255	rk	4.99309	-0.337216	0.727337	0.642912	1
FBgn0003256	rl	9.21146	-1.38066	1.02773	NA	NA
FBgn0003257	r-l	9.85697	-0.0442986	0.239307	0.853141	1
FBgn0003261	Rm62	15.2724	0.0409576	0.258082	0.873905	1
FBgn0003268	rod	10.1415	0.0898074	0.266266	0.735903	1
FBgn0003270	amos	-0.845214	-0.327626	4.40469	0.940707	1
FBgn0003274	RpLP2	15.4974	-0.00322936	0.361147	0.992865	1
FBgn0003275	RpII18	10.4281	-0.0159279	0.240561	0.947209	1
FBgn0003277	RpII215	12.2009	0.0369954	0.159587	0.816679	1
FBgn0003278	RpI135	9.29952	-0.270869	0.531302	0.610176	1
FBgn0003279	RpL4	16.1727	-0.036548	0.32646	0.910861	1
FBgn0003285	rst	10.4898	0.0646801	0.142624	0.650188	1
FBgn0003292	rt	10.2622	-0.398786	0.310575	0.199133	1
FBgn0003295	ru	6.17079	0.0726078	0.347198	0.834351	1
FBgn0003300	run	0.828631	2.58159	2.40503	0.283086	1
FBgn0003301	rut	11.091	0.0801876	0.234474	0.732359	1
FBgn0003302	rux	8.50885	0.084369	0.239953	0.725133	1
FBgn0003308	ry	4.41622	-0.328108	0.720303	0.64874	1
FBgn0003310	S	11.0052	-0.0414934	0.251785	0.869104	1
FBgn0003312	sad	5.61989	-0.378638	0.434869	0.383921	1
FBgn0003317	sax	10.4663	-0.00211111	0.1087	0.984505	1
FBgn0003319	Sb	11.4429	-0.163044	0.460209	0.723128	1
FBgn0003321	sbr	10.7742	-0.0461523	0.129976	0.722527	1
FBgn0003326	sca	9.31407	-0.00816486	0.208447	0.968755	1
FBgn0003330	Sce	9.93138	-0.0271806	0.271656	0.920301	1
FBgn0003334	Scm	10.3981	0.123657	0.176738	0.484139	1
FBgn0003339	Scr	5.9381	0.00136408	1.02391	0.998937	1
FBgn0003345	sd	12.5322	-0.136182	0.283575	0.63106	1
FBgn0003346	RanGAP	10.9971	0.152584	0.238059	0.521555	1
FBgn0003353	sei	8.68252	-0.0355001	0.334321	0.915435	1
FBgn0003356	Jon99Cii	1.94248	0	2.79024	1	1
FBgn0003357	Jon99Ciii	2.11106	0	2.51007	1	1
FBgn0003360	sesB	13.9973	-0.0168356	0.169162	0.920722	1
FBgn0003366	sev	6.47919	-0.0225207	0.522981	0.965652	1
FBgn0003371	sgg	11.8483	-0.0581576	0.252477	0.817821	1
FBgn0003372	Sgs1	-0.161334	0	5.20164	1	1
FBgn0003373	Sgs3	3.38193	0	2.0649	1	1
FBgn0003374	Sgs4	1.53816	0	2.14478	1	1
FBgn0003375	Sgs5	1.60961	0	2.28739	1	1
FBgn0003377	Sgs7	2.65831	1.39909	1.94093	0.471013	1
FBgn0003378	Sgs8	1.63763	-0.378378	1.38513	0.784721	1
FBgn0003380	Sh	3.74671	-0.932961	0.68742	0.17472	1
FBgn0003382	sha	10.9797	-0.679582	0.499251	0.173449	1
FBgn0003386	Shaw	3.75987	-0.272169	0.381262	0.475312	1
FBgn0003388	shd	7.59774	-0.15129	0.42407	0.721274	1
FBgn0003390	shf	12.4653	0.0621461	0.122769	0.612715	1
FBgn0003391	shg	13.4142	0.128027	0.172181	0.457142	1
FBgn0003392	shi	11.3149	0.0327658	0.0983077	0.738909	1
FBgn0003396	shn	10.9689	-0.0638785	0.243364	0.79295	1
FBgn0003401	shu	6.9218	-0.81367	0.461286	0.077746	1
FBgn0003410	sina	10.8232	0.050207	0.232369	0.828937	1
FBgn0003411	sisA	-0.647494	0	5.20164	1	1
FBgn0003415	skd	11.7387	-0.00911178	0.217378	0.966565	1
FBgn0003416	sl	9.25858	-0.0915921	0.264135	0.728769	1
FBgn0003423	slgA	10.337	0.104254	0.167387	0.533396	1
FBgn0003429	slo	3.04369	-0.932891	0.475214	0.0496349	1
FBgn0003430	slp1	5.00022	0.211043	0.472338	0.655015	1
FBgn0003435	sm	9.60278	-0.323716	0.909875	0.722005	1
FBgn0003444	smo	10.4047	-0.0893146	0.37067	0.809591	1
FBgn0003447	sn	12.8977	-0.265078	0.29664	0.371536	1
FBgn0003448	sna	1.1432	0.367507	1.35905	0.786842	1
FBgn0003449	snf	10.645	0.0803598	0.21291	0.70585	1
FBgn0003450	snk	-0.917055	1.49963	4.45728	0.736534	1
FBgn0003459	stwl	8.93838	0.0477275	0.233384	0.837961	1
FBgn0003460	so	7.4105	-0.791064	0.437871	0.0708222	1
FBgn0003462	Sod1	12.4709	0.0305578	0.304927	0.920175	1
FBgn0003463	sog	12.0892	0.0442249	0.281057	0.874967	1
FBgn0003464	sol	11.6736	0.0107785	0.286692	0.97001	1
FBgn0003475	spir	11.3814	0.0412497	0.287876	0.886061	1
FBgn0003479	spn-A	8.46174	0.111491	0.17772	0.530436	1
FBgn0003480	spn-B	6.91005	0.72238	0.311431	0.0203652	1
FBgn0003482	spn-D	4.83388	0.0179969	0.513525	0.972043	1
FBgn0003483	spn-E	5.03318	-0.107837	0.522205	0.836398	1
FBgn0003486	spo	0.955084	0.781527	1.61345	0.628115	1
FBgn0003495	spz	7.33315	-0.0875754	0.426336	0.837248	1
FBgn0003499	sr	8.26157	-0.34724	0.411529	0.398793	1
FBgn0003502	Btk29A	11.5929	-0.0258658	0.113076	0.819066	1
FBgn0003507	srp	8.95828	-0.0770011	0.473549	0.87083	1
FBgn0003512	Sry-delta	10.1263	-0.161748	0.261497	0.536215	1
FBgn0003513	ss	9.03043	-0.116534	0.288615	0.686383	1
FBgn0003514	sqh	12.045	0.0470696	0.109057	0.666029	1
FBgn0003515	st	4.4802	0.0311538	0.405686	0.938788	1
FBgn0003517	sta	16.0333	-0.053111	0.296987	0.858069	1
FBgn0003520	stau	11.2966	0.0950663	0.128891	0.460773	1
FBgn0003525	stg	13.0693	0.0550907	0.300051	0.854323	1
FBgn0003545	sub	8.89277	0.601502	0.500435	0.22938	1
FBgn0003557	Su(dx)	10.6706	0.0223977	0.16657	0.893036	1
FBgn0003559	su(f)	10.6082	0.0131485	0.15484	0.932327	1
FBgn0003567	su(Hw)	11.1936	-0.0533463	0.167448	0.750041	1
FBgn0003575	su(sable)	11.171	0.00184794	0.152663	0.990342	1
FBgn0003598	Su(var)3-7	10.9641	0.0852895	0.249139	0.732097	1
FBgn0003607	Su(var)205	12.4512	0.0529317	0.245618	0.829375	1
FBgn0003612	Su(var)2-10	11.5376	0.0175333	0.242455	0.942351	1
FBgn0003638	su(w[a])	12.5348	0.044995	0.188486	0.811324	1
FBgn0003651	svp	8.73126	-0.409877	0.395509	0.300049	1
FBgn0003654	sw	9.79864	-0.0469849	0.220657	0.83138	1
FBgn0003655	swa	-0.756026	-1.16275	4.47637	0.795055	1
FBgn0003656	sws	10.3543	0.0423449	0.136582	0.756537	1
FBgn0003660	Syb	11.9157	-0.00748131	0.0912371	0.934648	1
FBgn0003676	CCT1	12.4838	0.0443987	0.125761	0.724059	1
FBgn0003687	Tbp	9.20084	0.094726	0.153985	0.538446	1
FBgn0003701	thr	8.26794	0.151572	0.624377	0.808193	1
FBgn0003710	tipE	5.29487	0.0744335	0.327117	0.82	1
FBgn0003714	tko	9.70827	-0.0445841	0.424542	NA	NA
FBgn0003716	tkv	13.8698	0.136513	0.209202	0.514052	1
FBgn0003719	tld	9.16305	-0.132592	0.502594	0.791922	1
FBgn0003721	Tm1	13.1932	-0.00256472	0.259208	0.992105	1
FBgn0003731	Egfr	13.02	0.0970184	0.16353	0.552995	1
FBgn0003733	tor	-0.193895	-0.260228	2.06117	0.899532	1
FBgn0003741	tra	8.99585	-0.0419602	0.0974238	0.666688	1
FBgn0003742	tra2	9.97518	-0.000290401	0.212305	0.998909	1
FBgn0003744	trc	10.8574	0.088887	0.0951525	0.350225	1
FBgn0003747	Gr5a	11.288	-0.0533922	0.168384	0.751178	1
FBgn0003748	Treh	9.68671	-0.334302	0.267233	0.210944	1
FBgn0003751	trk	1.08268	0.163792	1.19883	0.891326	1
FBgn0003862	trx	11.9593	-0.1268	0.310111	0.682623	1
FBgn0003863	alphaTry	0.111411	0	3.73188	1	1
FBgn0003865	tsg	-1.19142	0.218522	3.77338	0.953819	1
FBgn0003866	tsh	11.6378	-0.0781987	0.18042	0.664705	1
FBgn0003867	tsl	10.3333	0.0545256	0.222711	0.806591	1
FBgn0003870	ttk	12.9742	0.0336617	0.212178	0.873946	1
FBgn0003882	tub	10.1436	0.112801	0.343136	0.742356	1
FBgn0003884	alphaTub84B	16.1145	0.0227114	0.180139	0.899671	1
FBgn0003885	alphaTub84D	11.7172	0.076475	0.140042	0.585007	1
FBgn0003886	alphaTub85E	8.2969	-0.642672	0.461895	0.16411	1
FBgn0003888	betaTub60D	13.1221	-0.281781	0.412429	0.494466	1
FBgn0003890	betaTub97EF	9.40495	0.023498	0.445652	0.957949	1
FBgn0003891	tud	12.6154	-0.322322	0.312066	0.301666	1
FBgn0003892	ptc	11.1549	-0.0778761	0.204808	0.703767	1
FBgn0003896	tup	8.03378	0.387468	0.608666	0.524395	1
FBgn0003900	twi	8.41135	-0.441861	0.586925	0.451546	1
FBgn0003922	snRNA:U2:38ABa	-0.239961	-2.06458	2.09302	0.323932	1
FBgn0003930	snRNA:U4:39B	0.39934	0.356125	1.21468	0.769382	1
FBgn0003941	RpL40	14.6055	-0.066516	0.138725	0.631598	1
FBgn0003942	RpS27A	15.3234	0.0878734	0.207411	0.671807	1
FBgn0003943	Ubi-p63E	12.3967	0.472388	0.467602	0.312383	1
FBgn0003944	Ubx	6.71981	-0.817067	0.607557	0.178677	1
FBgn0003950	unc	5.3703	-0.1429	0.509029	0.778917	1
FBgn0003963	ush	10.2118	-0.049337	0.299824	0.869296	1
FBgn0003964	usp	10.7073	0.01803	0.197366	0.927212	1
FBgn0003965	v	2.6513	0.627213	2.60365	0.809634	1
FBgn0003969	vap	11.0281	-0.0735065	0.283258	0.795247	1
FBgn0003975	vg	12.0614	0.0411866	0.28119	0.883548	1
FBgn0003977	vir	10.8291	0.0387473	0.215597	0.857372	1
FBgn0003978	vls	8.70033	0.300784	0.198734	0.130153	1
FBgn0003979	Vm26Aa	-1.28858	1.55309	3.62908	0.668683	1
FBgn0003984	vn	9.79155	-0.14689	0.114195	0.198334	1
FBgn0003996	w	5.53803	-0.0969054	0.506544	0.848285	1
FBgn0003997	hid	10.832	0.186122	0.3045	0.541043	1
FBgn0004003	wbl	11.4575	0.0688096	0.480866	0.886215	1
FBgn0004034	y	0.288555	-0.958534	1.20493	0.426316	1
FBgn0004045	Yp1	-0.803978	-0.815473	3.91582	0.835033	1
FBgn0004047	Yp3	8.05273	-0.120844	1.29344	NA	NA
FBgn0004049	yrt	11.6305	0.0331018	0.178401	0.8528	1
FBgn0004050	z	10.8352	0.130583	0.205778	0.525702	1
FBgn0004055	uzip	9.94777	-0.388146	0.172112	0.024121	1
FBgn0004057	Zw	8.85058	0.139634	0.178265	0.433452	1
FBgn0004066	Prosalpha4	11.7162	0.0573937	0.212764	0.78735	1
FBgn0004087	Dhfr	9.02312	0.0607716	0.290911	0.834526	1
FBgn0004101	bs	12.6681	0.0691319	0.364256	0.849474	1
FBgn0004102	oc	0.271267	1.13473	1.85442	0.540599	1
FBgn0004103	Pp1-87B	13.1424	-0.00875688	0.105323	0.933738	1
FBgn0004106	Cdk1	10.7312	-0.169391	0.675974	0.802132	1
FBgn0004107	Cdk2	9.55955	0.12801	0.366819	0.72711	1
FBgn0004108	Nrt	12.5854	0.0714645	0.327746	0.827392	1
FBgn0004110	tin	1.21814	1.04587	1.5793	0.507819	1
FBgn0004117	Tm2	5.51883	-2.05044	0.937674	0.0287624	1
FBgn0004118	nAChRbeta2	3.58962	-0.29291	0.578071	0.612364	1
FBgn0004132	boca	10.7327	0.0696831	0.152038	0.646718	1
FBgn0004133	blow	11.1958	-0.0298146	0.174943	0.864676	1
FBgn0004167	kst	12.7183	0.0264936	0.328247	0.935671	1
FBgn0004168	5-HT1A	2.60321	-0.783392	0.738422	0.288735	1
FBgn0004169	up	6.31016	-2.024	0.781673	0.00961643	1
FBgn0004170	sc	8.54332	-0.0955167	0.839647	0.909429	1
FBgn0004177	mts	13.359	-0.0283882	0.11058	0.797395	1
FBgn0004179	Csp	11.2795	0.097002	0.224331	0.665446	1
FBgn0004192	snRNA:U2:34ABb	-0.790542	-0.815475	3.34209	0.80723	1
FBgn0004197	Ser	12.3838	0.0485589	0.220306	0.825548	1
FBgn0004198	ct	10.0071	-0.033063	0.298319	0.91175	1
FBgn0004227	nonA	12.1894	0.0620666	0.135666	0.647314	1
FBgn0004228	mex1	-1.17117	-0.0941317	2.42953	0.969094	1
FBgn0004237	Hrb87F	13.0225	0.105285	0.142361	0.459565	1
FBgn0004240	DptA	1.37396	-0.692058	1.08368	0.523072	1
FBgn0004242	Syt1	6.53921	-0.187318	0.789816	0.812528	1
FBgn0004244	Rdl	3.7731	-0.538598	0.807376	0.50471	1
FBgn0004359	T48	10.5762	-0.0432917	0.212438	0.838521	1
FBgn0004360	Wnt2	11.166	-0.00362357	0.411474	0.992974	1
FBgn0004362	HmgD	14.1305	0.109945	0.180679	0.542851	1
FBgn0004363	porin	13.5002	-0.0731483	0.116709	0.530818	1
FBgn0004364	18w	12.7747	0.0259675	0.217304	0.90488	1
FBgn0004367	mei-41	8.40058	0.132901	0.262177	0.612217	1
FBgn0004368	Ptp4E	10.6287	-0.053166	0.272363	0.845234	1
FBgn0004369	Ptp99A	10.6723	0.0337022	0.15271	0.82533	1
FBgn0004370	Ptp10D	11.4217	0.0128322	0.212973	0.951955	1
FBgn0004373	fwd	11.2624	-0.0678911	0.171738	0.692609	1
FBgn0004374	neb	8.51468	0.235629	0.222176	0.288894	1
FBgn0004378	Klp61F	10.3771	0.235891	0.350877	0.5014	1
FBgn0004379	Klp67A	9.74281	0.0270884	0.202999	0.893845	1
FBgn0004380	Klp64D	8.7279	0.0222132	0.294998	0.939976	1
FBgn0004381	Klp68D	7.69307	0.0487754	0.131255	0.710185	1
FBgn0004387	Klp98A	10.8779	0.0285388	0.218188	0.895934	1
FBgn0004390	RasGAP1	11.1758	0.0480303	0.196504	0.806902	1
FBgn0004391	shtd	10.013	0.0756487	0.182949	0.679244	1
FBgn0004394	pdm2	10.9968	0.0902731	0.235831	0.701878	1
FBgn0004395	unk	10.4629	0.000661238	0.0845239	0.993758	1
FBgn0004396	CrebA	11.0475	-0.0513673	0.373291	0.890551	1
FBgn0004397	Vinc	11.6586	0.0404683	0.271069	0.881324	1
FBgn0004400	rhi	0.728513	0.0170104	0.891463	0.984776	1
FBgn0004401	Pep	13.9224	0.0702258	0.254138	0.782295	1
FBgn0004403	RpS14a	14.5257	-0.0909098	0.361206	0.801285	1
FBgn0004404	RpS14b	12.9569	-0.058373	0.276935	0.833057	1
FBgn0004406	tam	8.19752	0.345281	0.50579	0.494823	1
FBgn0004419	me31B	11.8206	-0.320492	0.778683	0.680646	1
FBgn0004425	LysB	1.64932	-1.05786	1.56277	0.49846	1
FBgn0004426	LysC	0.247685	-0.775145	3.0465	0.799157	1
FBgn0004427	LysD	2.91372	-0.123707	1.39952	0.929565	1
FBgn0004428	LysE	0.818875	-1.4956	3.23326	0.643674	1
FBgn0004429	LysP	0.0786723	-0.483658	3.1301	0.877201	1
FBgn0004430	LysS	2.0838	-0.291767	1.2332	0.812973	1
FBgn0004431	LysX	-0.175012	-0.0797776	2.30522	0.972393	1
FBgn0004432	Cyp1	14.7285	0.041395	0.283704	0.883993	1
FBgn0004435	Galphaq	8.6239	-0.322202	0.838195	NA	NA
FBgn0004436	Ubc6	10.9034	-0.313021	0.335399	0.350676	1
FBgn0004449	Ten-m	13.1235	-0.122499	0.192434	0.5244	1
FBgn0004456	mew	11.7813	0.173711	0.230736	0.451537	1
FBgn0004463	RpIII128	9.42647	0.0533629	0.229119	0.815835	1
FBgn0004465	Su(P)	9.25893	0.0210984	0.212559	0.920932	1
FBgn0004507	GlyP	10.5535	0.00564605	0.414978	0.989145	1
FBgn0004509	Fur1	10.698	-0.0189825	0.241696	0.937399	1
FBgn0004510	Ets97D	9.1307	0.0646088	0.137732	0.639004	1
FBgn0004511	dy	5.79749	-0.320265	0.620588	0.605808	1
FBgn0004512	Mdr49	11.1859	-0.165698	0.21071	0.431645	1
FBgn0004513	Mdr65	3.80535	-1.0966	0.717034	0.126176	1
FBgn0004514	Oct-TyrR	0.0351341	0.0933444	1.57482	0.952735	1
FBgn0004516	Gad1	-1.02659	2.27912	4.5621	0.617373	1
FBgn0004552	Akh	2.62165	1.01088	0.805604	0.209549	1
FBgn0004554	Edg91	5.48237	-0.461695	0.502052	0.357774	1
FBgn0004556	Dbp73D	8.39168	-0.0238282	0.313007	0.939318	1
FBgn0004567	slp2	3.4259	0.0433072	0.804058	0.957046	1
FBgn0004569	aos	8.66536	-0.195305	0.194432	0.315142	1
FBgn0004573	5-HT7	1.29168	-0.27514	0.799949	0.730887	1
FBgn0004574	Rop	12.2577	0.0554429	0.145229	0.702638	1
FBgn0004575	Syn	5.25086	-0.321134	0.29213	0.271644	1
FBgn0004577	Pxd	6.78212	-0.230037	0.423441	0.586953	1
FBgn0004580	Cbp53E	1.79504	0.106307	0.768417	0.889967	1
FBgn0004581	bgcn	3.37168	-0.373059	0.486008	0.442725	1
FBgn0004583	ex	12.638	0.0132289	0.197814	0.946681	1
FBgn0004584	Rrp1	11.3647	0.251727	0.219418	0.25128	1
FBgn0004587	B52	13.7104	0.0626982	0.216624	0.77225	1
FBgn0004588	Eig71Ea	-0.976599	-2.13287	3.80854	0.575463	1
FBgn0004592	Eig71Ee	1.51562	0	2.18254	1	1
FBgn0004595	pros	8.32035	-0.163236	0.572194	0.775429	1
FBgn0004597	CycC	9.13726	0.0495028	0.336127	0.882916	1
FBgn0004598	Fur2	12.1294	-0.0133159	0.166368	0.936206	1
FBgn0004606	zfh1	9.95226	-0.147622	0.354406	0.677019	1
FBgn0004607	zfh2	11.8779	-0.425385	0.445173	0.339299	1
FBgn0004611	Plc21C	9.96767	-0.0393773	0.151177	0.7945	1
FBgn0004618	gl	0.809828	-4.10522	1.68754	0.0149882	1
FBgn0004619	GluRIA	-0.965626	-2.08131	2.42289	0.39033	1
FBgn0004620	GluRIIA	1.37947	-1.01248	1.11295	0.362968	1
FBgn0004622	TkR99D	-0.0259103	-2.40688	1.97288	0.222472	1
FBgn0004623	Gbeta76C	-0.930145	0.645477	2.91875	0.824977	1
FBgn0004629	Cys	6.81055	-1.00752	0.642042	0.11659	1
FBgn0004635	rho	8.91795	0.117926	0.347143	0.73408	1
FBgn0004636	Rap1	11.7531	0.0197873	0.13206	0.880895	1
FBgn0004638	drk	11.2582	-0.189737	0.285681	0.506589	1
FBgn0004643	Zw10	10.4092	0.178297	0.183751	0.331887	1
FBgn0004644	hh	11.0177	0.0149676	0.27369	0.956387	1
FBgn0004646	ogre	13.6502	-0.00816232	0.23068	0.971774	1
FBgn0004647	N	13.8932	0.0210304	0.181227	0.907618	1
FBgn0004648	svr	11.3216	0.0436139	0.274041	0.87355	1
FBgn0004650	fs(1)N	2.95767	-0.287734	0.518003	0.578574	1
FBgn0004652	fru	12.3183	-1.02536	0.587437	0.0809005	1
FBgn0004654	Pgd	10.8018	0.0282379	0.244373	0.908007	1
FBgn0004655	wapl	10.852	0.037316	0.240273	0.876579	1
FBgn0004656	fs(1)h	12.7636	-0.0593148	0.250934	0.813141	1
FBgn0004657	mys	12.2866	0.0150424	0.130371	0.908143	1
FBgn0004687	Mlc-c	11.8857	-0.00352401	0.298817	0.990591	1
FBgn0004698	Xpc	10.8862	0.187601	0.340632	0.58181	1
FBgn0004777	Ccp84Ag	0.149618	-2.68855	3.24362	0.407176	1
FBgn0004780	Ccp84Ad	0.192956	1.12431	2.76779	0.684586	1
FBgn0004782	Ccp84Ab	-1.42465	-0.0941315	3.29213	0.977189	1
FBgn0004783	Ccp84Aa	0.746449	1.53143	2.37653	0.519317	1
FBgn0004784	inaC	-0.79546	-3.30999	5.11876	0.517866	1
FBgn0004795	retn	0.876428	-0.198826	1.4441	0.890492	1
FBgn0004797	mdy	8.95928	-0.598628	0.941575	0.524924	1
FBgn0004811	fs(2)ltoPP43	10.1192	0.0455604	0.23829	0.848371	1
FBgn0004828	His3.3B	14.5213	0.024324	0.262928	0.926291	1
FBgn0004832	Xpac	9.09334	0.148405	0.274423	0.588654	1
FBgn0004837	Su(H)	9.83387	0.1719	0.0911081	0.0591906	1
FBgn0004838	Hrb27C	14.3341	0.00889158	0.270654	0.973792	1
FBgn0004839	otk	11.0253	0.0493806	0.203199	0.807993	1
FBgn0004841	TkR86C	1.03772	0.0865766	1.23781	0.944239	1
FBgn0004852	Ac76E	5.10826	-0.00214395	0.437139	0.996087	1
FBgn0004854	B-H2	6.60315	0.423825	0.539865	0.43242	1
FBgn0004855	RpII15	9.67491	0.161308	0.279899	0.564407	1
FBgn0004856	Bx42	10.8732	0.04057	0.306197	0.894592	1
FBgn0004858	elB	10.602	0.0816516	0.247423	0.741394	1
FBgn0004859	ci	11.9343	-0.71226	0.67434	0.290861	1
FBgn0004860	ph-d	10.4064	0.0681697	0.101414	0.501462	1
FBgn0004861	ph-p	10.9958	0.0556735	0.12477	0.655447	1
FBgn0004862	bap	-2.31462e-05	0.591553	5.19852	0.909402	1
FBgn0004863	C15	7.03835	0.359887	0.564148	0.523519	1
FBgn0004864	hop	10.5417	0.107145	0.147053	0.466238	1
FBgn0004865	Eip78C	12.633	-0.481936	0.581532	0.407255	1
FBgn0004867	RpS2	15.4642	0.0108672	0.322486	0.973118	1
FBgn0004868	Gdi	13.1568	0.065977	0.185463	0.722033	1
FBgn0004870	bab1	5.66633	-0.329744	0.299139	0.270328	1
FBgn0004872	piwi	3.37846	0.952227	0.733058	0.193951	1
FBgn0004875	enc	11.2766	0.0375556	0.24245	0.8769	1
FBgn0004876	cdi	11.2334	-0.0416515	0.145131	0.774118	1
FBgn0004878	cas	1.53239	-0.815478	1.67674	0.626721	1
FBgn0004880	scrt	4.78758	-0.340116	0.790085	0.666846	1
FBgn0004882	orb	2.37007	-1.09005	0.761181	0.152128	1
FBgn0004885	tok	12.2698	0.0577299	0.145602	0.691743	1
FBgn0004888	Scsalpha1	11.7962	0.0493029	0.303378	0.870902	1
FBgn0004889	tws	11.641	0.15253	0.154504	0.323536	1
FBgn0004892	sob	9.07568	-0.577331	0.35022	0.099254	1
FBgn0004893	bowl	13.2882	0.15932	0.142208	0.262574	1
FBgn0004895	FoxL1	-1.26938	1.2991	3.06734	0.67191	1
FBgn0004897	fd96Ca	4.0988	-0.145879	1.31276	0.911518	1
FBgn0004898	fd96Cb	5.25549	-1.23289	1.29393	0.340679	1
FBgn0004901	Prat	10.2136	0.0133272	0.170188	0.937582	1
FBgn0004903	Rb97D	10.2525	-0.0792955	0.152187	0.60234	1
FBgn0004907	14-3-3zeta	13.7572	-0.173137	0.354253	0.625028	1
FBgn0004908	Arl2	8.33279	-0.245034	0.261356	0.348476	1
FBgn0004910	Eip63F-1	4.03457	-0.992059	0.741606	0.180988	1
FBgn0004913	Gnf1	10.2331	0.00450521	0.188195	0.980901	1
FBgn0004914	Hnf4	9.68798	0.0051482	0.196155	0.979061	1
FBgn0004915	TfIIB	10.1999	-0.011261	0.335689	0.973239	1
FBgn0004919	gol	5.30145	-0.455715	0.589535	0.439518	1
FBgn0004921	Ggamma1	12.1421	-0.0736293	0.275511	0.789279	1
FBgn0004924	Top1	12.2505	-0.0566814	0.15415	0.713096	1
FBgn0004926	eIF2beta	12.3025	0.0963766	0.153068	0.528936	1
FBgn0004956	upd1	10.1868	0.0434744	0.193186	0.821949	1
FBgn0004957	por	9.85566	-0.0155815	0.259666	0.952151	1
FBgn0004959	phm	7.16388	0.153361	0.370663	0.679058	1
FBgn0005198	gig	10.4291	0.0985851	0.152525	0.518051	1
FBgn0005278	Sam-S	12.4616	0.0469298	0.252886	0.852777	1
FBgn0005322	nmd	9.5629	0.0232728	0.568525	0.967347	1
FBgn0005355	Su(fu)	10.5413	0.0602114	0.124366	0.628282	1
FBgn0005386	ash1	10.0083	0.0622317	0.397201	0.8755	1
FBgn0005391	Yp2	1.98282	0.205039	0.709213	0.772499	1
FBgn0005411	U2af50	11.7082	0.0262391	0.266988	0.921711	1
FBgn0005427	ewg	10.7219	-0.05827	0.19654	0.766864	1
FBgn0005533	RpS17	14.861	-0.00775645	0.154863	0.960054	1
FBgn0005536	Mbs	11.2838	0.0313419	0.121972	0.79721	1
FBgn0005558	ey	4.07543	0.0344061	0.45495	0.939717	1
FBgn0005561	sv	5.91302	-0.780443	1.11733	0.48487	1
FBgn0005564	Shal	4.49294	0.233439	0.532052	0.660841	1
FBgn0005585	Calr	14.8752	0.0525724	0.11574	0.649663	1
FBgn0005586	Rab3	5.02828	-0.213362	0.647351	0.741708	1
FBgn0005593	RpL7	15.5127	-0.0130094	0.168231	0.938361	1
FBgn0005596	yem	9.95046	0.181736	0.143452	0.2052	1
FBgn0005612	Sox14	10.3275	-0.0194621	0.308746	0.949738	1
FBgn0005613	Sox15	10.82	0.0758651	0.222612	0.733258	1
FBgn0005616	msl-2	9.18657	0.111742	0.159333	0.483106	1
FBgn0005617	msl-1	9.76996	0.0138801	0.258214	0.957131	1
FBgn0005619	Hdc	2.05766	-1.85314	1.3328	0.164406	1
FBgn0005624	Psc	10.7373	0.242101	0.182719	0.185173	1
FBgn0005626	ple	5.63863	-0.0522141	0.661939	0.937128	1
FBgn0005631	robo1	11.0971	-0.031985	0.226962	0.887928	1
FBgn0005632	faf	12.2478	0.0677904	0.203543	0.739095	1
FBgn0005633	fln	-1.38132	-2.03113	2.70446	0.452634	1
FBgn0005636	nvy	7.98351	-0.122851	0.391175	0.753478	1
FBgn0005638	slbo	2.18623	0.850067	1.331	0.52304	1
FBgn0005640	Eip63E	10.6611	-0.0305743	0.121992	0.802104	1
FBgn0005642	wdn	9.98333	0.0327644	0.146827	0.823419	1
FBgn0005648	Pabp2	12.309	0.00611909	0.235623	0.979281	1
FBgn0005649	Rox8	12.477	0.100287	0.227379	0.659171	1
FBgn0005655	PCNA	11.1308	-0.0185501	0.216911	0.931848	1
FBgn0005658	Ets65A	4.52482	0.29154	0.275647	0.290213	1
FBgn0005659	Ets98B	8.8519	-0.00101246	0.232445	0.996525	1
FBgn0005660	Ets21C	6.56517	-0.197368	0.356015	0.579318	1
FBgn0005664	Crys	5.14263	-0.839822	1.27048	0.508593	1
[truncated: 11,148 more rows]
