# Supplementary material for: The mechanistic basis of genetic assimilation in natural fly populations
Source: Research Square preprint supplement (doi:10.21203/rs.3.rs-4258726/v1), 2024-05-10
Supplement: Supplementary file 5 [file 79ee75e9ff79b2959c4e49a5.xlsx]

## Sheet: Sheet1
Extended Data Table 6: Primers used in this work
Name	Experiment	Forward	Reverse
Pxd	Figure 2h, RT-qPCR	AACCGCAATCTTCTTTTCCCA	GCAGGCTGTTCCCAATCACAT
CG8907	Figure 2h, RT-qPCR	ATCATCCGCAGGAGTCATTCA	GCATTTCGGTATTGCCCAGTG
Act5C	Figure 2h, RT-qPCR (housekeeping)	CAGCAGCTCCTCGTTGGAGAA	CGGTGTTGGCATACAGATCCT
PGRP	Figure 2h and Extended Data Fig. 4d, RT-qPCR (housekeeping)	CCTGGTGAATGATAGCTTACTCTG	CTTACTCAAAACCGAAGAGATCG
aTub84B	Figure 2h, Extended Data Fig. 4d and 7b, RT-qPCR (housekeeping)	TGGGCCCGTCTGGACCACAA	TCGCCGTCACCGGAGTCCAT
Hsp83	Extended Data Fig. 7b, RT-qPCR	AAGATCCGCTATGAGTCCCTT	AGAGTACCAGCCGTCTTGTTAG
Cad96Ca	Extended Data Fig. 4d, RT-qPCR	AACGGGAGTGGTAACTCTCAA	CTTTGCCGTATAGGAGCCATC
AUAP	Figure 5f, 3'RACE-PCR	GGCCACGCGTCGACTAGTAC
Cad96Ca_3UTR_1	Figure 5f, 3'RACE-PCR	CGAGAGCGGTTTCCCGATCACAA
Cad96Ca_3UTR_2	Figure 5f, 3'RACE-PCR	CGACCAATGCACTGAACCCGAAC
