# Supplementary material for: The mechanistic basis of genetic assimilation in natural fly populations
Source: Research Square preprint supplement (doi:10.21203/rs.3.rs-4258726/v1), 2024-05-10
Supplement: Supplementary file 6 [file b1939fdf3fa5d9382873c96b.xlsx]

## Sheet: Table content
Extended Data Table 5 | Recapitulation of Waddington selection experiment using ectopic veins trait
A. Number of flies scored for the HS selection line in the Mix population
B. Number of flies scored for the Mix assimilated selection lines
C. Number of flies scored for the Mix non-assimilated selection lines
D. Number of flies scored for the HS selection line in the D907 population
E. Number of flies scored for the D907 assimilated selection line
F. Number of flies scored for the D907 non-assimilated selection line
G. Number of flies scored for the HS selection line in the D208 population
H. Number of flies scored for the D208 assimilated selection line
I. Number of flies scored for the HS selection line in the D437 and D820 populations

## Sheet: A.Mix_HS_sel
Extended Data Table 5 | A. Number of flies scored for the HS selection line in the Mix population
Mix HS selection Exp.1							Mix HS selection Exp.1
Generation	n females scored	n females ectopic veins	% ectopic veins				Generation	n females scored	n females ectopic veins	% ectopic veins
P0 (no HS)	93	14	15.0538				P0 (no HS)	101	7	6.93069
1	265	95	35.8491				1	154	44	28.5714
2	50	25	50				2	55	39	70.9091
3	61	36	59.0164				3	68	61	89.7059
4	120	65	54.1667
5	328	165	50.3049
6	269	110	40.8922
7	235	122	51.9149
8	296	149	50.3378
9	158	102	64.557
10	116	96	82.7586
11	92	87	94.5652

## Sheet: B.Mix_Assimilated
Extended Data Table 5 | B. Number of flies scored for the Mix assimilated selection lines
Selection experiment 1																Selection experiment 2
Mix assimilated flies				Mix Control					Mix assimilated selection from G8							Mix2 assimilated flies				Mix2 Control					Mix2 assimilated selection from G4
Generation	n females scored	n females ectopic veins	% ectopic veins	n females scored	n females ectopic veins	% ectopic veins			Generation	n females scored	n females ectopic veins	% ectopic veins				Generation	n females scored	n females ectopic veins	% ectopic veins	n females scored	n females ectopic veins	% ectopic veins			Generation	n females scored	n females ectopic veins	% ectopic veins
8	92	36	39.1304	71	8	11.2676			1	92	36	39.1304				4	85	38	44.7059	139	5	3.59712			1	85	39	45.8824
11	143	119	83.2168	119	13	10.9244			2	100	80	80													2	51	36	70.5882
									3	114	107	93.8596													3	59	59	100
Statistical analysis assimilated flies	Mix assimilated G8								4	78	74	94.8718				Table Analyzed	Mix2 assimilated G4								4	52	52	100
									5	107	107	100													10	101	101	100
P value and statistical significance									6	110	110	100				P value and statistical significance
Test	Chi-square								7	63	63	100				Test	Chi-square
Chi-square, df	15,79, 1								8	57	57	100				Chi-square, df	59,75, 1
z	3.973															z	7.73
P value	<0,0001								Mix assimilated selection from G12							P value	<0,0001
P value summary	****								Generation	n females scored	n females ectopic veins	% ectopic veins				P value summary	****
One- or two-sided	Two-sided								1	99	93	93.9394				One- or two-sided	Two-sided
Statistically significant (P < 0.05)?	Yes								2	72	72	100				Statistically significant (P < 0.05)?	Yes
									3	68	68	100
Data analyzed	Mix control G8	Mix assimilated G8	Total						4	38	38	100				Data analyzed	Mix2 Control G4	Mix2 Assimilated G4	Total
wt	63	56	119						5	32	32	100				No_EV	134	46	180
EV	8	36	44													EV	5	39	44
Total	71	92	163													Total	139	85	224
Percentage of row total	Mix control G8	Mix assimilated G8														Percentage of row total	Mix2 Control G4	Mix2 Assimilated G4
wt	52,94%	47,06%														No_EV	74,44%	25,56%
EV	18,18%	81,82%														EV	11,36%	88,64%
Percentage of column total	Mix control G8	Mix assimilated G8														Percentage of column total	Mix2 Control G4	Mix2 Assimilated G4
wt	88,73%	60,87%														No_EV	96,40%	54,12%
EV	11,27%	39,13%														EV	3,60%	45,88%
Percentage of grand total	Mix control G8	Mix assimilated G8														Percentage of grand total	Mix2 Control G4	Mix2 Assimilated G4
wt	38,65%	34,36%														No_EV	59,82%	20,54%
EV	4,91%	22,09%														EV	2,23%	17,41%
Statistical analysis assimilated flies	Mix assimilated G11
P value and statistical significance
Test	Chi-square
Chi-square, df	135,8, 1
z	11.65
P value	<0,0001
P value summary	****
One- or two-sided	Two-sided
Statistically significant (P < 0.05)?	Yes
Data analyzed	Mix control G8	Mix assimilated G11	Total
wt	106	24	130
EV	13	119	132
Total	119	143	262
Percentage of row total	Mix control G8	Mix assimilated G11
wt	81,54%	18,46%
EV	9,85%	90,15%
Percentage of column total	Mix control G8	Mix assimilated G11
wt	89,08%	16,78%
EV	10,92%	83,22%
Percentage of grand total	Mix control G8	Mix assimilated G11
wt	40,46%	9,16%
EV	4,96%	45,42%

## Sheet: C.Mix Non-assimilated
Extended Data Table 5 | C. Number of flies scored for the Mix non-assimilated selection lines
Selection experiment 1							Selection experiment 2
Mix non-assimilated from G8 (control)							Mix non-assimilated from G4 (control)
Generation	n females scored	n females ectopic veins	% ectopic veins				Generation	n females scored	n females ectopic veins	% ectopic veins
1	71	8	11.2676				1	139	5	3.59712
2	78	34	43.5897				2	51	11	21.5686
3	148	112	75.6757				3	51	25	49.0196
4	117	109	93.1624				4	51	36	70.5882
5	99	97	97.9798				5	53	46	86.7925
6	104	104	100				6	55	51	92.7273
7	56	56	100				7	58	57	98.2759
8	65	65	100				10	109	109	100

## Sheet: D.D907_HS_sel
Extended Data Table 5 | D. Number of flies scored for the HS selection line in the D907 population
D907 HS selection
Generation	n females scored	n females ectopic veins	% ectopic veins
P0 (no HS)	80	22	27.5
1	129	78	60.4651
2	77	51	66.2338
3	102	65	63.7255
4	79	56	70.8861
5	53	41	77.3585
6	123	47	38.2114
7	268	173	64.5522
8	298	172	57.7181
9	348	168	48.2759
10	265	150	56.6038
11	81	45	55.5556

## Sheet: E.D907_assimilated
Extended Data Table 5 | E. Number of flies scored for the D907 assimilated selection line
D907
D907 assimilated flies				D907 Control					D907 assimilated selection from G8
Generation	n females scored	n females ectopic veins	% ectopic veins	n females scored	n females ectopic veins	% ectopic veins			Generation	n females scored	n females ectopic veins	% ectopic veins	Comment
8	65	27	41.5385	93	16	17.2043			1	65	27	41.5385
11	117	65	55.5556	108	26	24.0741			2	82	53	64.6341
									3	110	74	67.2727
									4	129	93	72.093
Statistical analysis assimilated flies	D907 assimilated G8								5	88	76	86.3636
									6	92	81	88.0435
P value and statistical significance									7	60	58	96.6667
Test	Chi-square								8	63	59	93.6508
Chi-square, df	11,44, 1								9	79	75	94.9367
z	3.382								10	55	53	96.3636
P value	0.0007								26	85	66	77.6471	maintained flies with no more EV selection, not shown in Figure plot
P value summary	***								30	60	52	86.6667	maintained flies with no more EV selection, not shown in Figure plot
One- or two-sided	Two-sided
Statistically significant (P < 0.05)?	Yes
									D907 assimilated selection from G12
Data analyzed	D907 control G8	D907 assimilated G8	Total						Generation	n females scored	n females ectopic veins	% ectopic veins	Comment
wt	77	38	115						1	97	45	46.3918
EV	16	27	43						2	79	61	77.2152
Total	93	65	158						3	67	56	83.5821
									4	37	32	86.4865
Percentage of row total	D907 control G8	D907 assimilated G8							5	43	33	76.7442
wt	66,96%	33,04%
EV	37,21%	62,79%
Percentage of column total	D907 control G8	D907 assimilated G8
wt	82,80%	58,46%
EV	17,20%	41,54%
Percentage of grand total	D907 control G8	D907 assimilated G8
wt	48,73%	24,05%
EV	10,13%	17,09%
Statistical analysis assimilated flies	D907 assimilated G11
P value and statistical significance
Test	Chi-square
Chi-square, df	23,11, 1
z	4.807
P value	<0,0001
P value summary	****
One- or two-sided	Two-sided
Statistically significant (P < 0.05)?	Yes
Data analyzed	D907 control G11	D907 assimilated G11	Total
wt	82	52	134
EV	26	65	91
Total	108	117	225
Percentage of row total	D907 control G11	D907 assimilated G11
wt	61,19%	38,81%
EV	28,57%	71,43%
Percentage of column total	D907 control G11	D907 assimilated G11
wt	75,93%	44,44%
EV	24,07%	55,56%
Percentage of grand total	D907 control G11	D907 assimilated G11
wt	36,44%	23,11%
EV	11,56%	28,89%

## Sheet: F.D907_non-assimilated
Extended Data Table 5 | F. Number of flies scored for the D907 non-assimilated selection line
D907 non-assimilated from G8 (control)
Generation	n females scored	n females ectopic veins	% ectopic veins	Comment
1	93	16	17.2043
2	109	64	58.7156
3	82	46	56.0976
4	102	76	74.5098
5	88	55	62.5
6	109	87	79.8165
7	65	54	83.0769
8	58	45	77.5862
9	75	52	69.3333
10	43	37	86.0465
26	78	53	67.9487	maintained flies with no more EV selection, not shown in Figure plot
30	64	31	48.4375	maintained flies with no more EV selection, not shown in Figure plot

## Sheet: G.D208_HS_sel
Extended Data Table 5 | G. Number of flies scored for the HS selection line in the D208 population
D208 HS selection
Generation	n females scored	n females ectopic veins	% ectopic veins
P0 (no HS)	130	18	13.8462
1	284	144	50.7042
2	114	57	50
3	150	125	83.3333
4	185	137	74.0541
5	158	90	56.962
6	167	105	62.8743
7	228	190	83.3333
8	243	153	62.963
9	254	115	45.2756
10	202	131	64.8515
11	98	53	54.0816

## Sheet: H.D208_assimilated
Extended Data Table 5 | H. Number of flies scored for the D208 assimilated selection line
D208
D208 assimilated flies						D208 assimilated selection from G8
Generation	n females scored	n females ectopic veins	% ectopic veins			Generation	n females scored	n females ectopic veins	% ectopic veins
5	92	12	13.0435			1	89	18	20.2247
8	89	18	20.2247			2	101	7	6.93069
11	97	10	10.3093			3	59	10	16.9492
12	102	14	13.7255			4	84	10	11.9048
						5	47	4	8.51064
						D208 assimilated selection from G12
						Generation	n females scored	n females ectopic veins	% ectopic veins
						1	102	14	13.7255
						2	128	22	17.1875
						3	88	20	22.7273
						4	81	5	6.17284
						5	83	13	15.6627
						6	39	4	10.2564

## Sheet: I.D437_D820_HS_sel
Extended Data Table 5 | I. Number of flies scored for the HS selection line in the D437 and D820 populations
D437 HS selection						D820 HS selection
Generation	n females scored	n females ectopic veins	% ectopic veins			Generation	n females scored	n females ectopic veins	% ectopic veins
P0 (no HS)	93	14	15.0538			P0 (no HS)	99	16	16.1616
1	112	32	28.5714			1	134	77	57.4627
2	34	12	35.2941			2	48	41	85.4167
3	19	5	26.3158			3	13	6	46.1538
