# Supplementary material for: The mechanistic basis of genetic assimilation in natural fly populations
Source: Research Square preprint supplement (doi:10.21203/rs.3.rs-4258726/v1), 2024-05-10
Supplement: Supplementary file 7 [file b1eff6922fa60840de540669.xlsx]

## Sheet: Table content
Extended Data Table 1 | Transcriptome analysis Mix selection lines
A. Consistently Differentially Expressed Genes for selection experiments 1 and 2 in Mix assimilated selection lines in wing discs (WD) and pupal wings (PW).
B. Consistently Differentially Expressed Genes for selection experiments 1 and 2 in Mix non-assimilated selection lines in wing discs (WD) and pupal wings (PW).
C. Differential expression analysis (DESeq2) in Mix assimilated vs control from selection experiment 1 in wing disc.
D. Differential expression analysis (DESeq2) in Mix assimilated vs control from selection experiment 1 in pupal wing.
E. Differential expression analysis (DESeq2) in Mix non-assimilated vs control from selection experiment 1 in wing disc.
F. Differential expression analysis (DESeq2) in Mix non-assimilated vs control from selection experiment 1 in pupal wing.
G. Differential expression analysis (DESeq2) in Mix assimilated vs control from selection experiment 2 in wing disc.
H. Differential expression analysis (DESeq2) in Mix assimilated vs control from selection experiment 2 in pupal wing.
I. Differential expression analysis (DESeq2) in Mix non-assimilated vs control from selection experiment 2 in wing disc.
J. Differential expression analysis (DESeq2) in Mix non-assimilated vs control from selection experiment 2 in pupal wing.

## Sheet: A. Consistently_DEGs_Mix_A
Extended Data Table 1A | Consistently deregulated gene for the two selection experiments for Mix Assimilated selection. (cut-off: padj<0.05 and |log2(FC)|>=0.58)
Wing disc										Pupal wing
Type	Symbol	GENEID	log2FC_WD_Mix_A	padjust_WD_Mix_A	log2FC_WD_Mix2_A	padjust_WD_Mix2_A	Comment			Type	Symbol	GENEID	log2FC_PW_Mix_A	padjust_PW_Mix_A	log2FC_PW_Mix2_A	padjust_PW_Mix2_A	Comment
up	CG12184	FBgn0025387	1.69327	0.0218329	1.7093	0.0424261				up	JhI-26	FBgn0028424	1.53786	4.7353e-07	1.57219	2.19146e-08
up	CG15772	FBgn0029799	1.22641	0.0374296	2.04541	1.05e-05				up	Spn42De	FBgn0033115	1.8092	1.56434e-14	1.39137	5.74294e-08
up	CG2225	FBgn0032957	0.950054	2.98e-13	0.99011	3.81e-15				up	CG4250	FBgn0034761	1.85407	2.19108e-20	3.34625	7.83522e-39
up	Spn42De	FBgn0033115	1.36157	2.92e-05	1.92675	1.82e-09				up	ItgaPS5	FBgn0034880	1.05834	4.95824e-11	0.606085	0.00327991
up	CG4927	FBgn0034139	2.53008	4.39e-26	1.6393	4.03e-11				up	CG16758	FBgn0035348	0.716015	0.00970205	0.693602	0.0166243
up	CG14692	FBgn0037836	2.01675	3.71e-08	1.39913	0.000110305				up	CG16959	FBgn0036481	0.781185	1.50163e-26	0.588988	3.10211e-15
up	Ssl2	FBgn0041780	0.806898	0.0104436	1.70146	6.01e-11				up	CG7079	FBgn0038849	1.11387	0.00968439	0.935329	0.0050898
up	CG30428	FBgn0050428	0.605448	0.00327543	0.604886	0.00310473				up	CG15556	FBgn0039821	1.75267	0.0218667	1.81834	0.0120564
up	lncRNA:CR43241	FBgn0262886	0.905749	8.45e-06	1.06265	5.81e-08				up	Ssl2	FBgn0041780	2.69187	8.50351e-12	4.49975	3.76349e-25
up	CR43361	FBgn0263093	0.642133	3.44e-07	0.595614	3.08e-06				up	Sp212	FBgn0053329	4.24606	2.23607e-14	1.35373	0.00816122
down	Mlc2	FBgn0002773	-1.89468	2.08e-07	-1.44382	0.000527836				up	BG642163	FBgn0083938	0.868914	0.0438412	1.29014	0.0217784
down	Aldh	FBgn0012036	-1.29134	0.00162321	-2.08745	3.24e-09				up	NaCP60E	FBgn0085434	1.15232	1.96714e-14	0.626735	0.000443055
down	dtr	FBgn0023090	-1.5563	9.33e-08	-0.895533	0.00385938				up	CG42586	FBgn0260954	1.31597	0.0447998	2.62354	2.01896e-07
down	Ac3	FBgn0023416	-2.42436	1.03e-20	-2.02036	2.33e-16				up	lncRNA:CR43241	FBgn0262886	0.638029	4.04812e-06	0.899456	4.19498e-12
down	Vajk1	FBgn0028938	-3.69347	0.00453602	-2.90367	0.0330312				up	qin	FBgn0263974	0.885848	0.00455858	0.822329	0.00456885
down	SK	FBgn0029761	-7.03803	7.11e-08	-3.33506	1.93e-06				up	lncRNA:CR44231	FBgn0265162	4.01256	0.0110783	1.89031	0.0330355
down	CG9360	FBgn0030332	-1.71553	0.0244245	-1.86097	0.0092763				up	lncRNA:CR44458	FBgn0265651	3.08275	6.86099e-08	0.977305	0.0364468
down	CG4678	FBgn0030778	-1.90349	4.19e-12	-0.984298	0.000544893				up	asRNA:CR46354	FBgn0286034	0.637497	0.000537747	0.912864	5.22864e-12
down	CG9272	FBgn0032907	-0.921871	2.38e-15	-0.773713	2.49e-10				down	Pxd	FBgn0004577	-0.724491	0.0170576	-1.50227	5.79145e-10
down	CG14764	FBgn0033236	-1.00371	2.21e-48	-1.2101	8.43e-70				down	dtr	FBgn0023090	-0.783837	0.00183292	-0.807908	0.000741175
down	CG15080	FBgn0034391	-1.51872	0.0280565	-5.29613	6.44e-16				down	Ac3	FBgn0023416	-1.27817	1.29533e-14	-2.52757	2.32314e-55
down	CG5597	FBgn0034920	-5.21578	1.03e-17	-3.81445	8.46e-13				down	unc-13	FBgn0025726	-0.974351	1.80657e-08	-0.658622	0.000826684
down	pyx	FBgn0035113	-1.35352	0.0377142	-1.61117	0.0170107				down	Cdc7	FBgn0028360	-1.4687	5.10461e-20	-0.736718	7.80592e-05
down	CG13032	FBgn0036652	-6.09578	0.000683627	-5.7493	0.00191636				down	Gbeta5	FBgn0030011	-0.985787	0.000167964	-1.43703	8.38841e-08
down	CG4570	FBgn0037844	-3.1345	8.07e-28	-2.13595	1.61e-12				down	CG9360	FBgn0030332	-0.920709	0.036841	-3.30775	6.18483e-26
down	CG12883	FBgn0039538	-0.770554	9.27e-05	-0.983422	7.76e-08				down	SPH93	FBgn0032638	-0.772481	0.00832941	-0.998755	0.000281806
down	Loxl1	FBgn0039848	-1.89649	9.53e-08	-2.11053	9.82e-08				down	CG17681	FBgn0032668	-2.64254	6.07062e-06	-1.68905	0.000246632
down	CG1674	FBgn0039897	-1.26411	1.55e-10	-1.07295	2.39e-07				down	CG9272	FBgn0032907	-0.763061	4.17317e-06	-0.859339	8.40374e-08
down	CG31612	FBgn0051612	-0.810176	6.74e-06	-0.655658	0.000367218				down	CG14764	FBgn0033236	-0.618203	3.31524e-13	-0.853842	9.66273e-25
down	CG31807	FBgn0051807	-1.57943	0.0388096	-3.32408	1.25e-05				down	krimp	FBgn0034098	-1.7622	0.000796013	-3.01846	0.00151919
down	CG31999	FBgn0051999	-0.851697	1.81e-06	-0.752432	5.79e-05				down	CG13685	FBgn0035816	-1.16525	0.00395735	-2.16443	3.3682e-11
down	GstE5	FBgn0063495	-0.818134	0.0352822	-2.33621	3.04e-07				down	CG5144	FBgn0035957	-0.988475	0.000239703	-0.827387	0.00247971
down	Septin4	FBgn0259923	-2.69456	5.75e-10	-1.17071	0.00780472				down	CG3253	FBgn0041706	-1.21881	0.000221546	-0.918673	0.0391116
down	CG42598	FBgn0260997	-0.843379	0.00660705	-0.789298	0.0405146				down	CG31140	FBgn0051140	-0.795099	2.27023e-07	-0.826636	8.71802e-08
down	asRNA:CR43425	FBgn0263344	-2.43143	6.56e-14	-1.25536	0.000759406				down	lncRNA:CR31451	FBgn0051451	-0.695772	1.51468e-06	-0.659925	8.57673e-06
down	CR43482	FBgn0263493	-1.2455	0.0455953	-3.52434	1.42e-14				down	CG31807	FBgn0051807	-1.01544	0.0212484	-3.3693	8.33676e-23
down	CR44906	FBgn0266211	-3.246	1.96e-43	-2.4231	1.76e-32				down	CG31999	FBgn0051999	-0.980834	0.000204816	-0.686222	0.0346355
down	lncRNA:CR45298	FBgn0266836	-6.49242	1.46e-15	-7.12449	1.35e-08				down	lncRNA:alphagamma-element:CR32865	FBgn0052865	-0.895092	0.00815983	-2.93825	6.97866e-13
down	lncRNA:dntRL	FBgn0267585	-2.53224	3.8e-74	-5.40154	9.67e-79				down	GstE5	FBgn0063495	-0.74138	0.000804264	-1.6903	3.4066e-19
down	Cad96Ca	FBgn0022800	-0.569112	0.0171472	-0.592838	0.00912733	Confirmed downregulation by RT-qPCR, Extended Data Fig.4d			down	CG42598	FBgn0260997	-0.864422	0.0172118	-1.37676	0.00045958
										down	tx	FBgn0263118	-0.744997	0.00570349	-0.712466	0.0110501
										down	CG43725	FBgn0263971	-0.716129	0.00540328	-0.886483	0.000104646
										down	asRNA:CR44030	FBgn0264822	-4.09636	1.24347e-15	-2.79437	6.8218e-09
										down	CR44906	FBgn0266211	-1.65627	7.58389e-06	-3.79817	1.8022e-13
										down	lncRNA:CR45298	FBgn0266836	-6.98924	8.00506e-12	-7.64915	2.24796e-10
										down	lncRNA:dntRL	FBgn0267585	-1.25887	7.00662e-11	-6.33497	8.44033e-43

## Sheet: B. Consistently_DEGs_Mix_NA
Extended Data Table 1B | Consistently deregulated gene for the two selection experiments for Mix Non-assimilated selection. (cut-off: padj<0.05 and |log2(FC)|>=0.58)
Wing disc										Pupal wing
Type	Symbol	GENEID	log2FC_WD_Mix_N	padjust_WD_Mix_N	log2FC_WD_Mix2_N	padjust_WD_Mix2_N	Comment			Type	Symbol	GENEID	log2FC_PW_Mix_N	padjust_PW_Mix_N	log2FC_PW_Mix2_N	padjust_PW_Mix2_N	Comment
up	CG15772	FBgn0029799	3.18646	4.38852e-14	1.45391	0.00585041				up	Men	FBgn0002719	0.656828	1.24909e-05	0.979461	4.08815e-13
up	CG4250	FBgn0034761	2.25878	2.97232e-14	1.91941	7.11566e-08				up	mud	FBgn0002873	0.867355	1.23582e-05	1.74428	4.30144e-23
up	Eglp2	FBgn0034883	2.75941	0.0041479	2.80752	0.00154432				up	DNApol-theta	FBgn0002905	0.588122	4.45583e-05	0.950141	1.27177e-13
up	Cpr67Fa1	FBgn0036108	1.78248	0.0432518	2.34754	0.00450134				up	spn-B	FBgn0003480	1.81895	3.24902e-16	0.886483	7.99761e-06
up	CG13046	FBgn0036595	1.10743	0.00638487	1.14714	0.0153391				up	spn-E	FBgn0003483	1.40712	0.0229437	2.77058	3.08923e-10
up	CG5281	FBgn0037902	1.59206	8.61419e-09	0.737911	0.0307142				up	bgcn	FBgn0004581	1.33725	0.0213356	2.06772	1.51713e-05
up	CG10232	FBgn0039108	1.23909	0.0152992	2.07045	0.000287705				up	l(2)03659	FBgn0010549	1.10913	3.54524e-09	0.619055	0.00324468
up	Ssl2	FBgn0041780	0.981449	0.000488138	1.6589	2.5569e-10				up	Lcp9	FBgn0025578	5.0522	6.36286e-23	1.09493	0.0133026
up	NaPi-III	FBgn0260795	0.735092	0.00184709	2.16594	3.64086e-31				up	CG9631	FBgn0027563	6.30653	4.0267e-07	2.22541	0.00194334
up	St3	FBgn0265052	1.36157	0.00241016	1.17486	0.0148586				up	CG5808	FBgn0027617	0.63457	6.47232e-05	0.985973	4.13754e-13
down	Hsc70-2	FBgn0001217	-11.8776	4.68623e-26	-10.8244	2.40592e-21				up	CG31705	FBgn0028490	0.698685	6.06034e-07	1.24715	1.31875e-22
down	tipE	FBgn0003710	-2.57161	0.0437621	-2.5827	0.027453				up	Nep1	FBgn0029843	0.679849	0.00591312	4.81232	5.15393e-139
down	Alg3	FBgn0011297	-0.654629	2.9799e-06	-0.699456	8.66044e-07				up	CG7322	FBgn0030968	1.15365	7.63335e-16	0.627809	3.89852e-05
down	Aldh	FBgn0012036	-1.54688	4.39003e-05	-1.37274	0.000603918				up	FANCI	FBgn0033354	0.865744	0.0059283	1.4568	1.20294e-08
down	Cyp9c1	FBgn0015040	-0.709404	0.000133297	-0.903674	2.98428e-07				up	CG13742	FBgn0033372	1.02696	1.41194e-09	0.816357	1.34904e-06
down	Cad96Ca	FBgn0022800	-2.26441	5.61358e-37	-1.07557	1.04531e-08				up	Prx2540-2	FBgn0033518	0.938135	0.0228972	0.872236	0.0100995
down	CG15646	FBgn0030665	-1.85563	2.98892e-08	-2.40416	2.97135e-12				up	Cyp6a23	FBgn0033978	0.766439	0.00572397	2.06542	6.60604e-18
down	CG5022	FBgn0032225	-4.6653	1.86015e-12	-1.80782	0.00115949				up	CG4250	FBgn0034761	2.31927	1.7582e-32	4.3217	3.08006e-67
down	Cpr51A	FBgn0033942	-1.68497	0.00020936	-1.26027	0.014151				up	St1	FBgn0034887	1.4807	0.00409431	1.60204	0.00028309
down	CG9812	FBgn0034860	-0.9705	0.00132316	-1.01783	0.000721289				up	sona	FBgn0034903	1.11733	0.00854969	1.15749	0.00187936
down	ItgaPS5	FBgn0034880	-0.653215	0.007587	-0.812311	0.000319475				up	CG15879	FBgn0035309	0.636228	0.0092419	1.04795	1.47584e-07
down	CG5597	FBgn0034920	-4.25358	6.83753e-17	-4.78411	7.82959e-14				up	CG10064	FBgn0035724	1.6938	0.000735102	1.22984	0.00907415
down	CG10339	FBgn0034972	-3.61708	0.00621762	-4.44143	0.00489853				up	CG10960	FBgn0036316	0.607651	0.00015697	0.768033	1.20502e-07
down	CG13685	FBgn0035816	-1.06441	0.00145368	-0.912696	0.00376168				up	CG13737	FBgn0036382	0.672596	0.00770337	1.87799	9.94597e-20
down	CG6310	FBgn0036121	-1.42847	1.82841e-14	-2.21668	7.15244e-34				up	CG13046	FBgn0036595	1.04832	3.37326e-07	0.895778	4.96317e-06
down	Fum3	FBgn0036162	-3.29184	6.21236e-08	-1.75757	0.00526657				up	CG12947	FBgn0037753	0.681094	0.00139786	0.771695	7.20715e-05
down	CG7377	FBgn0036176	-7.33117	1.46194e-09	-1.63015	0.00492621				up	CG5281	FBgn0037902	1.17177	8.36701e-10	0.598552	0.00228337
down	Smyd4-2	FBgn0036282	-3.80933	7.89118e-29	-1.76214	1.75283e-14				up	CG12224	FBgn0037974	0.878658	1.32511e-07	0.88862	1.10512e-08
down	CG13032	FBgn0036652	-6.86741	5.35011e-05	-4.26206	0.042291				up	Ugt37A2	FBgn0038082	4.3222	0.00520314	2.64875	0.00493904
down	CG14850	FBgn0038239	-6.71862	5.59775e-07	-5.65959	0.000112537				up	CG9297	FBgn0038181	1.02309	0.00760892	1.35735	8.77278e-06
down	CG6912	FBgn0038290	-7.275	5.2978e-20	-6.25437	1.25139e-16				up	EndoU	FBgn0038381	1.4219	1.06447e-08	0.754528	0.00304692
down	Sgsh	FBgn0038660	-0.788401	8.91039e-14	-1.07729	4.60419e-24				up	CG7794	FBgn0038565	1.5307	1.26654e-06	0.762378	0.0325092
down	CG6678	FBgn0038917	-1.15441	5.14481e-09	-0.598845	0.0132161				up	CG7079	FBgn0038849	2.08857	9.64369e-11	1.62659	1.846e-10
down	CG6330	FBgn0039464	-0.604596	0.031357	-0.960618	7.31261e-06				up	CG17279	FBgn0038850	2.93145	0.0371298	2.5403	0.000844457
down	CG12883	FBgn0039538	-0.842412	9.0423e-06	-0.918032	9.59919e-07				up	CG16710	FBgn0039101	1.07916	0.00111854	1.90909	4.1895e-10
down	Loxl1	FBgn0039848	-1.76179	4.81845e-07	-1.98408	7.01694e-07				up	CG13599	FBgn0039128	0.638559	0.00151124	1.01951	1.43465e-08
down	CG11550	FBgn0039864	-0.735039	3.34969e-06	-0.97438	1.8329e-10				up	CG17786	FBgn0039167	1.05842	7.14825e-06	2.06849	1.16968e-21
down	yellow-d	FBgn0041712	-0.701604	0.0462507	-0.991473	0.00169409				up	CG11852	FBgn0039297	0.826173	0.0100619	1.49275	1.50973e-08
down	CG30197	FBgn0050197	-0.937834	0.0247369	-0.936874	0.0320858				up	TTLL6B	FBgn0039501	0.733794	2.69175e-06	1.70689	8.70352e-30
down	CG30428	FBgn0050428	-0.593319	0.00527378	-0.608598	0.00363126				up	CG15556	FBgn0039821	2.26602	0.000457166	3.37722	8.04615e-10
down	CG31157	FBgn0051157	-9.73002	5.14806e-17	-10.0552	6.24519e-18				up	CG1544	FBgn0039827	0.983577	2.92586e-07	1.11485	5.42037e-10
down	CG31262	FBgn0051262	-5.03773	0.000270437	-4.52185	0.00223147				up	CG17104	FBgn0040496	1.15	2.25873e-08	0.736773	0.000270561
down	CG31436	FBgn0051436	-2.02575	1.23482e-05	-3.00347	5.70823e-12				up	CG15213	FBgn0040843	0.61598	0.0446617	0.609317	0.018763
down	Cpr66D	FBgn0052029	-0.984924	0.00149448	-1.09105	0.000368182				up	Ssl2	FBgn0041780	3.58624	5.38785e-22	4.78687	1.86136e-29
down	CG32055	FBgn0052055	-2.95644	3.35796e-10	-2.19812	1.49717e-05				up	CG18754	FBgn0042106	1.23534	0.00458145	3.52641	1.31006e-13
down	asRNA:CR43787	FBgn0264328	-0.854678	0.000147744	-0.87322	0.000223503				up	CG30427	FBgn0043792	1.46785	1.98798e-05	1.00118	0.00394502
down	asRNA:CR44029	FBgn0264821	-0.64216	0.0482031	-0.776208	0.00751586				up	Obp83ef	FBgn0046876	0.980972	0.0398299	1.08465	0.0138762
down	lncRNA:CR44135	FBgn0264984	-3.99432	6.40328e-13	-3.27454	4.95005e-06				up	GstT1	FBgn0050000	0.593551	0.0149888	1.79951	4.53665e-20
down	lncRNA:CR45298	FBgn0266836	-7.86005	6.79595e-11	-5.35884	1.31172e-08				up	CG31326	FBgn0051326	3.40773	1.0918e-05	1.97424	5.6303e-05
down	asRNA:CR45600	FBgn0267160	-6.02016	3.62295e-25	-6.3657	1.93387e-22				up	ATPsynepsilonL	FBgn0051477	0.766533	0.000599974	1.45013	5.28361e-15
down	lncRNA:CR46350	FBgn0286030	-5.97515	3.34969e-06	-3.06603	0.00247114				up	CG33109	FBgn0053109	5.0642	0.000313133	2.96267	0.000192744
										up	Sp212	FBgn0053329	6.84204	1.93557e-38	1.14951	0.00790495
										up	CG40006	FBgn0058006	0.651944	4.1508e-09	0.616195	9.66691e-09
										up	lncRNA:CR33938	FBgn0063127	0.831174	0.00123859	0.640868	0.00796377
										up	NaCP60E	FBgn0085434	1.21016	3.9682e-16	1.77113	1.78834e-36
										up	CG34423	FBgn0085452	0.966389	0.0474807	2.59202	4.92969e-11
										up	CG42494	FBgn0260026	0.775015	0.0136027	0.818273	0.00943067
										up	CG43295	FBgn0262987	1.63785	0.00086559	1.28867	0.00227277
										up	Mrp4	FBgn0263316	0.585659	0.0180362	1.23984	1.40451e-10
										up	qin	FBgn0263974	1.4046	2.81408e-08	2.14016	8.78628e-24
										up	CG43844	FBgn0264426	1.25231	8.7198e-05	0.942812	0.00159419
										up	lncRNA:CR44042	FBgn0264834	0.617445	2.24726e-07	0.58361	4.50326e-07
										up	St3	FBgn0265052	1.18463	0.000295977	0.837104	0.00686602
										up	lncRNA:CR44231	FBgn0265162	4.59626	0.000860256	2.98535	1.97025e-06
										up	CG44245	FBgn0265180	0.679154	5.73118e-06	0.902162	4.27251e-11
										up	asRNA:CR46473	FBgn0287604	0.983368	0.000480556	1.78563	8.44425e-13
										up	lncRNA:CR46481	FBgn0287612	0.638683	0.0373761	0.960798	0.0016779
										down	Ace	FBgn0000024	-0.851844	0.00672102	-0.880484	0.00323424
										down	Hsc70-2	FBgn0001217	-6.60457	1.83247e-43	-5.92709	3.68627e-30
										down	ImpL1	FBgn0001256	-0.70088	5.36924e-08	-1.21992	1.80441e-24
										down	l(3)87Df	FBgn0002354	-0.615777	0.0267743	-0.616422	0.0178819
										down	ry	FBgn0003308	-4.01168	7.8048e-16	-2.06881	2.87532e-05
										down	tipE	FBgn0003710	-1.08801	0.00461093	-1.38395	3.81627e-05
										down	Pxd	FBgn0004577	-2.13869	1.38746e-20	-3.74109	2.05386e-58
										down	Hsp70Ba	FBgn0013277	-4.4186	7.10365e-07	-2.7186	0.00357175
										down	cher	FBgn0014141	-0.647094	1.09385e-06	-0.905364	2.13181e-13
										down	mGluR	FBgn0019985	-0.701981	1.41748e-07	-1.51749	8.24458e-33
										down	TM4SF	FBgn0020372	-0.693185	0.00172843	-0.614772	0.00289266
										down	Cad96Ca	FBgn0022800	-0.994293	3.36386e-18	-0.917484	3.47481e-16
										down	Actbeta	FBgn0024913	-0.619115	0.0101161	-0.727016	0.000916575
										down	NimB1	FBgn0027929	-1.68127	3.93554e-06	-1.22985	0.00396542
										down	CG15765	FBgn0029814	-0.923078	0.00241479	-0.748363	0.0113232
										down	cyr	FBgn0030001	-0.589928	0.0463101	-1.36118	1.66753e-07
										down	fiz	FBgn0030594	-1.24942	7.01298e-05	-1.51163	1.95466e-07
										down	Efhc1.1	FBgn0030691	-1.09446	2.03608e-05	-1.2637	8.66305e-09
										down	CG12507	FBgn0030729	-0.934958	1.25272e-10	-0.932088	6.73837e-11
										down	r-cup	FBgn0031142	-1.26407	2.55838e-05	-1.01847	0.000844457
										down	CG12194	FBgn0031636	-0.785156	0.0380509	-2.73917	2.6158e-15
										down	CG17350	FBgn0032772	-1.19811	0.00101016	-2.57783	3.06454e-05
										down	Corin	FBgn0033192	-0.865041	1.27567e-05	-0.585865	0.00329953
										down	CG8008	FBgn0033387	-0.979071	0.009668	-1.18453	0.000395516
										down	Cyp6a20	FBgn0033980	-2.13974	0.00132241	-2.23146	0.000167138
										down	CG9993	FBgn0034553	-5.00875	0.0419594	-4.53215	0.0338823
										down	CG3257	FBgn0034978	-0.916342	0.00220075	-1.33808	5.34288e-06
										down	Nplp1	FBgn0035092	-2.16464	7.52255e-18	-2.713	7.36787e-25
										down	CG12003	FBgn0035234	-1.92052	1.26063e-06	-3.84362	5.62012e-21
										down	DopEcR	FBgn0035538	-1.02303	0.000347895	-2.5432	7.18276e-21
										down	CG6310	FBgn0036121	-0.774156	8.24404e-07	-0.997557	6.73837e-11
										down	CG11726	FBgn0036156	-3.42014	0.000208901	-3.0789	9.40775e-05
										down	CG7377	FBgn0036176	-3.88715	2.73269e-10	-1.19144	0.031762
										down	CG14110	FBgn0036352	-1.43561	7.26845e-05	-2.25843	5.90301e-09
										down	CG17364	FBgn0036391	-1.43654	0.000375709	-1.46498	0.000163651
										down	CG6836	FBgn0036834	-1.39409	0.000412644	-1.69638	2.49451e-06
										down	laza	FBgn0037163	-0.603506	0.00356423	-0.976917	8.76324e-08
										down	CG7966	FBgn0038115	-1.02031	6.63665e-17	-1.90954	2.25293e-52
										down	CG14850	FBgn0038239	-7.77609	3.39049e-11	-6.29116	7.1395e-08
										down	dpr9	FBgn0038282	-0.71603	0.0082424	-0.702158	0.00360266
										down	CG6912	FBgn0038290	-11.6757	1.24996e-24	-8.30524	1.24504e-18
										down	CG3984	FBgn0038291	-6.91228	2.81408e-08	-3.67767	9.81812e-06
										down	AOX2	FBgn0038348	-3.3881	1.52135e-08	-5.12682	3.61092e-14
										down	Irc	FBgn0038465	-1.21311	1.85087e-09	-2.07575	1.44707e-26
										down	CG8907	FBgn0038466	-1.74181	0.0072982	-1.51303	0.0119486
										down	CG5225	FBgn0038468	-3.10126	0.0128173	-3.04393	0.00540142
										down	cysu	FBgn0038511	-0.711223	0.0163455	-3.04649	5.06843e-40
										down	Mpc1	FBgn0038662	-0.588733	7.957e-06	-0.684379	2.2577e-07
										down	CG4770	FBgn0038751	-1.72919	0.000593406	-4.57311	2.78457e-17
										down	CG17270	FBgn0038828	-0.748641	0.0406951	-1.17607	0.000578119
										down	HHEX	FBgn0038852	-3.35724	0.00165681	-4.62655	0.000489715
										down	CG5326	FBgn0038983	-0.810344	2.70791e-05	-0.681224	0.000293756
										down	Nepl14	FBgn0039023	-0.580732	0.0103685	-1.98965	3.00158e-22
										down	CG17119	FBgn0039045	-0.761903	0.00781167	-0.759446	0.00523065
										down	Lsd-1	FBgn0039114	-0.855331	1.55118e-05	-0.667641	0.000687187
										down	CG14257	FBgn0039479	-0.769476	2.1108e-05	-0.679056	0.000263453
										down	CG11841	FBgn0039628	-3.48391	3.09313e-15	-2.47967	0.000362329
										down	superdeath	FBgn0039640	-0.609978	0.0235228	-0.924176	0.00011754
										down	CG12071	FBgn0039808	-0.704444	0.0482601	-0.824577	0.00983538
										down	CG15547	FBgn0039809	-1.50488	1.30747e-07	-1.50026	2.2961e-07
										down	Loxl1	FBgn0039848	-2.15045	1.14991e-06	-1.4583	0.00240196
										down	CG11550	FBgn0039864	-0.825521	9.29362e-07	-0.738475	9.79219e-06
										down	CG13643	FBgn0040601	-1.15638	1.43375e-09	-1.92285	1.21376e-24
										down	Tep1	FBgn0041183	-1.39258	0.00816495	-3.03198	5.01592e-09
										down	yellow-d	FBgn0041712	-0.974589	2.5769e-08	-1.0969	1.68115e-10
										down	lambdaTry	FBgn0043470	-1.44657	0.00211141	-1.39325	0.00311828
										down	CG30380	FBgn0050380	-0.717766	7.68862e-06	-1.31058	1.48864e-17
										down	Ugt35D1	FBgn0051002	-4.95253	0.000299948	-4.96961	0.000103123
										down	ppk22	FBgn0051105	-0.988556	0.0223896	-1.18906	0.00757278
										down	CG31157	FBgn0051157	-8.12028	8.76712e-14	-4.83697	8.46789e-08
										down	CG31200	FBgn0051200	-2.56286	0.0437699	-2.78851	0.0283753
										down	CG31204	FBgn0051204	-5.34488	0.000683268	-4.86339	0.000919673
										down	CG31436	FBgn0051436	-4.83477	0.00239439	-5.06986	0.000260429
										down	CG32040	FBgn0052040	-0.855717	0.00315559	-2.0467	2.67079e-13
										down	lncRNA:alphagamma-element:CR32865	FBgn0052865	-2.06254	1.53827e-12	-3.30799	1.82133e-14
										down	CG33286	FBgn0053286	-1.34635	1.55894e-09	-0.924246	1.33185e-05
										down	Cadps	FBgn0053653	-0.831816	9.90061e-08	-0.580979	0.000174191
										down	Sdic1	FBgn0067861	-5.67259	1.87497e-05	-4.18057	0.00197035
										down	Nlg3	FBgn0083963	-0.718084	0.017662	-0.583292	0.0498192
										down	CG34213	FBgn0085242	-0.911081	1.2277e-10	-0.767525	3.57192e-08
										down	Pdxk	FBgn0085484	-0.743116	3.04704e-21	-0.618173	8.89892e-14
										down	t	FBgn0086367	-1.48127	0.000182134	-2.37307	2.83857e-07
										down	Unc-115b	FBgn0260463	-0.813237	0.0045158	-1.77725	1.46032e-07
										down	Ect3	FBgn0260746	-0.948844	0.0218577	-1.35836	9.33488e-05
										down	gce	FBgn0261703	-1.99706	5.30151e-14	-0.95249	0.00293497
										down	CG42795	FBgn0261928	-0.696002	0.0231145	-0.632952	0.0280832
										down	kibra	FBgn0262127	-1.00544	1.60227e-09	-0.583529	0.000591909
										down	tx	FBgn0263118	-0.731498	0.00401445	-1.57406	4.31099e-13
										down	CG43725	FBgn0263971	-2.21456	1.1506e-19	-0.724204	0.000437401
										down	lncRNA:CR44091	FBgn0264900	-1.1815	0.0125159	-0.984333	0.0308581
										down	lncRNA:CR44135	FBgn0264984	-3.33832	3.4923e-24	-2.37234	3.04492e-11
										down	asRNA:CR45028	FBgn0266388	-0.64537	0.00374566	-1.08394	1.44148e-07
										down	asRNA:CR45044	FBgn0266404	-0.658669	0.0226876	-0.639889	0.0165495
										down	lncRNA:CR45298	FBgn0266836	-5.84599	1.48402e-15	-6.57992	5.50012e-14
										down	asRNA:CR45600	FBgn0267160	-10.5009	1.15559e-24	-6.86421	2.09224e-26
										down	lncRNA:CR46040	FBgn0267707	-1.44889	0.0306572	-2.68499	0.000118163
										down	VAChT	FBgn0270928	-0.864526	0.000815757	-0.735511	0.00369324
										down	Osi21	FBgn0283678	-1.78577	0.0248153	-3.34776	0.000689912
										down	para	FBgn0285944	-1.06449	0.00250161	-1.48048	2.21073e-06

## Sheet: C. DESEQ2_Exp.1_WD_Mix_A_vs_C
Extended Data Table 1C | Differential expression analysis (DESeq2) in Mix assimilated vs control from selection experiment 1 in wing disc.
GENEID	Symbol	log2BaseMean	log2FC	Stderr_log2FC	pvalue	padjust
FBgn0000008	a	9.42802	0.0209617	0.136114	0.877609	0.964078
FBgn0000014	abd-A	1.21047	-2.22596	1.77354	0.209445	NA
FBgn0000015	Abd-B	-1.37609	-3.17257	5.09188	0.533243	NA
FBgn0000017	Abl	10.9931	-0.0559615	0.120619	0.642682	0.866106
FBgn0000018	abo	8.30422	-0.15081	0.117012	0.197454	0.560707
FBgn0000022	ac	8.68119	0.119424	0.107803	0.267948	0.639054
FBgn0000024	Ace	1.98784	0.251459	1.15605	0.827806	0.947839
FBgn0000032	Acph-1	9.45576	-0.188651	0.0874155	0.0309205	0.23278
FBgn0000036	nAChRalpha1	1.55466	-1.56316	1.08772	0.15069	0.504796
FBgn0000037	mAChR-A	0.471175	1.61639	1.55102	0.297344	NA
FBgn0000038	nAChRbeta1	-1.28284	0	4.32853	1	NA
FBgn0000042	Act5C	16.7863	0.14798	0.0771582	0.0551272	0.311991
FBgn0000043	Act42A	14.891	0.120121	0.0641567	0.0611633	0.329778
FBgn0000044	Act57B	8.58458	0.07492	0.307488	0.8075	0.938902
FBgn0000046	Act87E	8.24383	-0.022271	0.263807	0.932721	0.979742
FBgn0000052	Pfas	10.9394	-0.107457	0.0807376	0.183209	0.545442
FBgn0000053	Gart	11.4902	-0.389224	0.108477	0.000333107	0.011921
FBgn0000055	Adh	-1.20129	0.0418439	4.13003	0.991916	NA
FBgn0000057	adp	9.14175	-0.117501	0.070551	0.0958184	0.40916
FBgn0000061	al	10.4447	0.255933	0.0917908	0.00529994	0.0843204
FBgn0000063	Mps1	9.02841	0.0327093	0.0914884	0.7207	0.90142
FBgn0000064	Ald1	12.6951	-0.371264	0.0850142	1.25917e-05	0.000783669
FBgn0000071	Ama	12.3068	0.36723	0.100444	0.000256108	0.00965538
FBgn0000075	amd	9.29086	-0.875292	0.207267	2.41046e-05	0.00138195
FBgn0000077	amx	7.22485	-0.13464	0.158915	0.396857	0.739151
FBgn0000078	Amy-d	2.58635	7.04305	5.10189	NA	NA
FBgn0000079	Amy-p	2.5089	3.23878	1.63235	0.0472423	0.289154
FBgn0000083	AnxB9	12.4465	-0.0533229	0.0642707	0.40673	0.745279
FBgn0000084	AnxB10	8.20177	-0.103769	0.192062	0.589	0.842372
FBgn0000092	dyw	3.70949	0.304156	0.476988	0.523695	0.804864
FBgn0000097	aop	11.5296	0.141761	0.112937	0.209398	0.573892
FBgn0000100	RpLP0	15.7492	0.028261	0.0569885	0.619959	0.855319
FBgn0000108	Appl	6.02364	-0.372789	0.282867	0.187539	0.5483
FBgn0000109	Aprt	7.614	0.025286	0.168055	0.880399	0.964563
FBgn0000114	bru1	3.17814	-0.988246	0.939782	0.292997	0.665275
FBgn0000115	Arl1	10.1077	0.16017	0.0958556	0.0947315	0.407573
FBgn0000116	Argk	13.9607	0.0914865	0.0741972	0.217569	0.583779
FBgn0000117	arm	14.3226	-0.0151857	0.0646868	0.814397	0.941544
FBgn0000119	arr	12.7351	0.00216767	0.118702	0.98543	0.99573
FBgn0000121	Arr2	3.91548	-0.778528	0.489424	0.111677	0.441502
FBgn0000137	ase	5.3076	0.413631	0.320703	0.197132	0.56045
FBgn0000139	ash2	10.1153	-0.0455473	0.0579599	0.43196	0.759333
FBgn0000140	asp	11.4226	-0.0454507	0.122247	0.710047	0.895441
FBgn0000146	aub	4.20347	-0.556389	0.410671	0.175472	0.537512
FBgn0000147	aurA	9.76814	-0.0991953	0.0970751	0.306857	0.676789
FBgn0000150	awd	14.8059	0.139612	0.0905223	0.123003	0.462647
FBgn0000152	Axs	9.66846	0.0135466	0.0796133	0.864888	0.959238
FBgn0000153	b	5.13939	0.775367	0.472491	0.100794	0.419962
FBgn0000157	Dll	11.1137	0.129317	0.0662122	0.0508104	0.301594
FBgn0000158	bam	2.29617	-0.107558	0.6612	0.870778	0.961641
FBgn0000163	baz	10.804	-0.021429	0.128311	0.867364	0.960274
FBgn0000173	ben	12.4896	0.0420503	0.039629	0.288645	0.661067
FBgn0000179	bi	11.5568	-0.13884	0.102552	0.175784	0.538128
FBgn0000180	bib	10.8495	-0.0589349	0.149756	0.69392	0.888848
FBgn0000181	bic	14.6732	0.0878838	0.0820863	0.284337	0.656096
FBgn0000183	BicD	11.1914	-0.114509	0.115691	0.322282	0.687324
FBgn0000206	boss	0.422889	-0.191659	1.36141	0.888044	NA
FBgn0000212	brm	12.808	-0.0251714	0.0787717	0.74931	0.914129
FBgn0000216	Brd	8.16146	0.0704746	0.136544	0.605762	0.849258
FBgn0000221	brn	7.8453	0.0164337	0.114104	0.885482	0.966044
FBgn0000228	Bsg25D	10.015	-0.0825708	0.0948046	0.383777	0.729961
FBgn0000229	bsk	10.394	0.00333618	0.0534367	0.950218	0.984864
FBgn0000233	btd	2.80142	0.862039	0.630158	0.171321	0.53212
FBgn0000239	bur	11.4168	0.00598266	0.0456733	0.895785	0.969424
FBgn0000241	bw	1.18918	1.01768	1.10272	0.35607	NA
FBgn0000244	by	9.36902	-0.285295	0.0929397	0.0021429	0.0462085
FBgn0000246	c(3)G	7.85745	-0.367932	0.134118	0.00608158	0.0929407
FBgn0000247	ca	10.3686	-0.14335	0.109326	0.189785	0.550575
FBgn0000250	cact	11.2522	-0.0139508	0.0485304	0.773757	0.924063
FBgn0000251	cad	-1.12738	0.0432906	2.46705	0.986	NA
FBgn0000253	Cam	13.9824	0.0930233	0.0520785	0.0740646	0.363258
FBgn0000256	capu	11.1817	-0.164803	0.0823259	0.0453029	0.284472
FBgn0000257	car	9.01843	-0.134116	0.076071	0.0778931	0.373101
FBgn0000259	CkIIbeta	12.1801	0.147344	0.06228	0.0179898	0.170549
FBgn0000261	Cat	13.0746	0.237508	0.297661	0.42492	0.754458
FBgn0000273	Pka-C1	11.4205	-0.0846163	0.0867547	0.329386	0.691978
FBgn0000283	Cp190	12.3772	0.0392604	0.0715789	0.583354	0.83946
FBgn0000286	Cf2	9.59315	-0.176681	0.0813937	0.0299538	0.228244
FBgn0000287	salr	12.0136	0.0474162	0.0794496	0.550635	0.820111
FBgn0000289	cg	12.6626	0.0349855	0.088011	0.690989	0.88699
FBgn0000299	Col4a1	11.9045	-0.230345	0.296793	0.437682	0.762353
FBgn0000303	ChAT	0.808651	-0.144928	1.13909	0.898757	NA
FBgn0000307	chif	11.4822	0.062006	0.0765874	0.418164	0.751509
FBgn0000308	chic	14.7604	0.127729	0.0809268	0.114491	0.447656
FBgn0000316	cin	10.5795	0.0412139	0.0488136	0.398495	0.740439
FBgn0000317	ck	11.3856	0.0597509	0.164694	0.716755	0.899507
FBgn0000318	cl	11.2018	-0.0395632	0.0651561	0.543714	0.815234
FBgn0000319	Chc	13.7307	0.0251743	0.0964974	0.794185	0.933309
FBgn0000320	eya	8.92755	0.0533391	0.142646	0.708459	0.894733
FBgn0000326	clt	8.8397	-0.101023	0.0745774	0.175543	0.537559
FBgn0000330	cm	9.99413	0.0218533	0.0654024	0.738277	0.90905
FBgn0000339	cni	10.0484	0.111557	0.083491	0.181496	0.544602
FBgn0000346	comt	8.2182	0.0813745	0.111784	0.466638	0.777799
FBgn0000351	cort	7.04969	-0.487895	0.185329	0.00847366	0.111248
FBgn0000352	cos	11.1347	0.000554137	0.0841908	0.994748	0.998349
FBgn0000355	Cp15	0.369363	0.167331	1.80148	0.925995	NA
FBgn0000357	Cp18	2.07056	-0.138362	0.794024	0.861666	0.958974
FBgn0000370	crc	12.5883	0.0855183	0.0896764	0.34027	0.700402
FBgn0000376	crm	9.98506	-0.200468	0.0851612	0.0185735	0.173705
FBgn0000377	crn	10.3519	-0.0397472	0.0496203	0.423117	0.753394
FBgn0000382	csw	10.7677	-0.0293703	0.0892437	0.742078	0.910312
FBgn0000384	cta	10.4825	0.0694843	0.0614141	0.257884	0.630495
FBgn0000394	cv	10.0174	-0.0388922	0.0655955	0.553242	0.821643
FBgn0000395	cv-2	9.89583	-0.254219	0.0921252	0.00578905	0.0893154
FBgn0000404	CycA	12.4878	-0.015716	0.060926	0.796444	0.933351
FBgn0000405	CycB	12.6531	0.0231964	0.0502399	0.644287	0.866106
FBgn0000406	Cyt-b5-r	3.65565	-5.80295	2.02308	0.0041259	0.0713854
FBgn0000411	D	0.995697	-2.2175	1.64437	0.177484	NA
FBgn0000412	D1	14.0332	0.115232	0.0499794	0.0211336	0.187771
FBgn0000414	Dab	11.0145	-0.11438	0.115406	0.32163	0.686858
FBgn0000416	Sap-r	13.0322	-0.00288727	0.0670118	0.965633	0.990499
FBgn0000422	Ddc	5.97706	-2.16889	0.792763	0.00622174	0.0943387
FBgn0000426	SmF	10.8262	0.179283	0.116158	0.122725	0.462312
FBgn0000442	Pkg21D	-0.390371	0	5.20139	1	NA
FBgn0000447	Dhod	10.8794	-0.0440278	0.0702382	0.530767	0.807502
FBgn0000448	Hr3	5.54339	0.434917	1.79003	0.808031	0.939256
FBgn0000449	dib	4.39054	-0.438515	0.50001	0.380481	0.728697
FBgn0000451	ect	4.62224	-0.00476733	0.417062	0.99088	0.997567
FBgn0000454	Dip-B	11.6796	0.206831	0.097276	0.0334842	0.242835
FBgn0000455	Dip-C	9.60112	0.00751904	0.0627178	0.904573	0.972847
FBgn0000459	disco	6.82616	0.0116999	0.134029	0.930438	0.979001
FBgn0000463	Dl	11.9428	0.00659661	0.10274	0.948806	0.984107
FBgn0000464	Lar	7.82011	-0.104484	0.114177	0.360139	0.712512
FBgn0000473	Cyp6a2	1.30588	-3.7948	1.72205	0.0275483	NA
FBgn0000477	DNaseII	2.98083	-2.22348	1.51179	0.141357	0.494802
FBgn0000479	dnc	8.86489	-0.412224	0.128272	0.00131044	0.0329789
FBgn0000482	dor	9.9839	-0.0321805	0.0732596	0.660469	0.873195
FBgn0000489	Pka-C3	8.89202	-0.269997	0.170505	0.113303	0.444992
FBgn0000490	dpp	10.6046	-0.000176091	0.075101	0.998129	0.999189
FBgn0000492	Dr	11.2918	0.161366	0.0782375	0.0391587	0.26495
FBgn0000499	dsh	10.6516	-0.0526313	0.0607744	0.386484	0.73115
FBgn0000504	dsx	10.7241	-0.0375373	0.0780049	0.630362	0.860581
FBgn0000520	dwg	9.39659	-0.13363	0.0771787	0.0833729	0.385401
FBgn0000524	dx	11.7241	-0.0894076	0.0774935	0.248605	0.619325
FBgn0000527	e	4.53412	3.39849	1.2755	0.00771183	0.105091
FBgn0000533	ea	8.71531	-0.299663	0.211437	0.156403	0.511868
FBgn0000535	eag	-1.28089	0	4.27139	1	NA
FBgn0000536	eas	10.3904	0.0218465	0.0487085	0.653781	0.869882
FBgn0000541	E(bx)	13.0318	-0.0482148	0.120223	0.688386	0.885785
FBgn0000542	ec	12.944	0.00687406	0.13005	0.957846	0.987647
FBgn0000543	ecd	10.339	-0.017695	0.0651782	0.786016	0.928745
FBgn0000546	EcR	11.5806	-0.302695	0.17026	0.0754293	0.367506
FBgn0000547	ed	13.6984	-0.0953771	0.0935386	0.307892	0.677673
FBgn0000551	Edg78E	2.70317	-0.677394	0.930599	0.466667	0.777799
FBgn0000557	eEF1alpha2	10.688	-0.424531	0.448022	0.343349	0.702431
FBgn0000559	eEF2	16.7355	-0.0404893	0.0442434	0.360113	0.712512
FBgn0000560	eg	5.72429	0.451848	0.245221	0.0653848	0.340782
FBgn0000562	egl	11.1431	-0.168911	0.0913034	0.0643143	0.338296
FBgn0000565	MsrA	10.4595	-0.0179504	0.105451	0.864834	0.959238
FBgn0000566	Eip55E	10.6718	0.0912333	0.0750601	0.224187	0.589962
FBgn0000567	Eip74EF	11.3698	-0.232217	0.103543	0.024915	0.206424
FBgn0000568	Eip75B	11.834	-0.110252	0.20015	0.581739	0.838761
FBgn0000575	emc	13.0167	0.104544	0.0816851	0.200602	0.563025
FBgn0000576	ems	10.2023	0.119636	0.0765592	0.118132	0.454559
FBgn0000577	en	10.816	0.119032	0.0821082	0.147141	0.500229
FBgn0000578	ena	11.9683	-0.00917111	0.124478	0.941268	0.983055
FBgn0000579	Eno	13.4807	-0.0341342	0.073863	0.643989	0.866106
FBgn0000581	E(Pc)	12.2217	-0.090599	0.121785	0.45692	0.771704
FBgn0000588	esc	8.62988	-0.0588487	0.11823	0.618662	0.854997
FBgn0000591	E(spl)m8-HLH	8.98237	0.0591473	0.146034	0.68546	0.885082
FBgn0000592	Est-6	0.918796	-3.58603	1.94092	0.0646616	NA
FBgn0000594	Est-P	3.97272	-1.47695	0.776174	0.0570585	0.317861
FBgn0000611	exd	12.865	0.0288054	0.0515661	0.576427	0.835884
FBgn0000615	exu	5.06082	-0.182143	0.261946	0.486838	0.786459
FBgn0000617	e(y)1	9.54544	0.0331449	0.0690588	0.631261	0.860581
FBgn0000618	e(y)2	9.0971	0.0176707	0.114746	0.877611	0.964078
FBgn0000625	eyg	10.1646	-0.10803	0.0689392	0.117108	0.453085
FBgn0000629	E(z)	10.1314	-0.103682	0.0659584	0.115969	0.451434
FBgn0000633	CG17716	2.83591	-1.82704	0.862889	0.0342302	0.246567
FBgn0000635	Fas2	12.4108	-0.00766664	0.100315	0.939081	0.982481
FBgn0000636	Fas3	13.9192	0.140829	0.0628639	0.0250766	0.206781
FBgn0000639	Fbp1	12.5443	-1.56288	1.41633	0.269821	0.640392
FBgn0000640	Fbp2	10.0369	-2.77271	1.31145	0.0344948	0.247754
FBgn0000644	Fcp3C	5.42921	-0.224172	0.228564	0.326701	0.68978
FBgn0000658	fj	12.5177	0.0553014	0.0576749	0.337636	0.698263
FBgn0000659	fkh	0.252532	1.30529	2.86468	0.648643	NA
FBgn0000662	fl(2)d	11.3755	-0.0250517	0.0721192	0.728317	0.903774
FBgn0000667	Actn	12.0955	-0.0287994	0.053716	0.59186	0.842981
FBgn0000709	fliI	10.0682	0.0818737	0.0874633	0.349226	0.707153
FBgn0000711	flw	10.4891	-0.00430341	0.0701765	0.951102	0.984931
FBgn0000719	fog	8.72611	0.180849	0.142077	0.203057	0.566886
FBgn0000721	for	10.9197	0.0213254	0.0727255	0.769345	0.922493
FBgn0000723	FER	11.4375	0.0118639	0.0986685	0.904293	0.972847
FBgn0000808	gd	3.74797	0.772425	0.45266	0.0879314	0.393197
FBgn0000810	fs(1)K10	9.98421	0.153732	0.0741593	0.0381723	0.261935
FBgn0000826	png	4.83576	0.168998	0.287117	0.556127	0.822964
FBgn0000928	fs(1)Yb	3.75182	-0.0432578	0.499493	0.930987	0.9793
FBgn0000996	dup	10.6002	0.058068	0.0958343	0.544567	0.815832
FBgn0001075	ft	13.3606	-0.0583741	0.136186	0.668189	0.876639
FBgn0001078	ftz-f1	8.65299	-0.563596	0.451331	0.211759	0.576168
FBgn0001079	fu	9.9286	-0.0201411	0.0689209	0.770107	0.922784
FBgn0001083	fw	10.3029	-0.0100825	0.0717301	0.888217	0.967299
FBgn0001084	fy	9.28712	-0.0460683	0.0640995	0.472326	0.780235
FBgn0001085	fz	11.5804	-0.110842	0.0759148	0.144266	0.497705
FBgn0001086	fzy	11.2325	-0.13097	0.0812582	0.107011	0.432087
FBgn0001087	g	10.9674	-0.0130998	0.094553	0.88981	0.968258
FBgn0001089	Gal	9.93756	0.179686	0.464185	0.698683	0.89065
FBgn0001090	bnb	13.3443	-0.428764	0.147351	0.0036164	0.0648876
FBgn0001091	Gapdh1	12.4929	0.0200598	0.0985034	0.83863	0.950802
FBgn0001092	Gapdh2	13.8396	-0.0344775	0.0768492	0.653693	0.869882
FBgn0001098	Gdh	13.145	-0.00229161	0.0662937	0.972425	0.992152
FBgn0001099	gdl	3.55195	-0.0188762	0.338742	0.955561	0.986935
FBgn0001104	Galphai	12.3831	0.047544	0.0512249	0.353334	0.70835
FBgn0001105	Gbeta13F	12.8023	0.0330982	0.0872738	0.704506	0.892865
FBgn0001108	DCTN1-p150	10.822	-0.031649	0.122601	0.796295	0.933351
FBgn0001112	Gld	8.63647	-0.1908	0.527548	0.717596	0.899688
FBgn0001114	Glt	11.4566	0.354488	0.245241	0.148327	0.501972
FBgn0001122	Galphao	10.0789	0.0628725	0.0898509	0.484088	0.785348
FBgn0001123	Galphas	11.6386	-0.0219451	0.0393492	0.577048	0.836102
FBgn0001124	Got1	11.3701	0.0411272	0.0425522	0.333787	0.696547
FBgn0001125	Got2	11.5536	0.177412	0.0742105	0.0168183	0.164681
FBgn0001128	Gpdh1	8.52691	0.196312	0.0859718	0.0224042	0.193471
FBgn0001133	grau	8.98648	-0.034563	0.0827798	0.676292	0.88037
FBgn0001134	Grd	-0.964075	1.35941	2.10693	0.518793	NA
FBgn0001137	grk	3.90074	-0.151964	0.375561	0.685749	0.885285
FBgn0001138	grn	11.2967	-0.0819283	0.0926114	0.376347	0.724978
FBgn0001139	gro	12.7578	-0.00240954	0.0650233	0.97044	0.992077
FBgn0001142	Gs1	9.62996	-0.11755	0.6313	0.852285	0.954891
FBgn0001145	Gs2	8.44806	-0.359941	0.417677	0.388815	0.733412
FBgn0001147	gsb-n	0.508781	-0.0308151	1.63788	0.98499	NA
FBgn0001148	gsb	0.574574	1.85111	1.11499	0.0968734	NA
FBgn0001149	GstD1	14.143	-0.256481	0.100119	0.0104146	0.124731
FBgn0001150	gt	5.23256	-0.321481	0.307609	0.295979	0.667382
FBgn0001168	h	10.4835	-0.133261	0.079764	0.0947834	0.407612
FBgn0001169	H	11.4094	-0.0431436	0.107666	0.688629	0.885785
FBgn0001170	H2.0	5.87211	0.15185	0.212119	0.474072	0.781059
FBgn0001174	halo	-1.07948	-0.520219	3.02388	0.863408	NA
FBgn0001179	hay	9.67508	0.0482532	0.0640055	0.450914	0.768158
FBgn0001185	her	9.72417	0.0130185	0.0620536	0.833828	0.950275
FBgn0001186	Hex-A	11.1357	-0.129262	0.0710826	0.0689917	0.349065
FBgn0001187	Hex-C	1.13391	-0.958181	1.3854	0.48917	NA
FBgn0001189	hfw	10.6268	-0.148351	0.0585647	0.0113055	0.1303
FBgn0001197	His2Av	13.3915	0.117618	0.0708226	0.096766	0.411586
FBgn0001202	hook	9.35367	-0.0708675	0.0947607	0.454546	0.769728
FBgn0001206	Hmr	9.77549	-0.157178	0.0921929	0.088217	0.393197
FBgn0001208	Hn	6.15388	-2.31968	0.810669	0.00421722	0.0722913
FBgn0001215	Hrb98DE	13.6366	0.0951218	0.061649	0.122841	0.462312
FBgn0001216	Hsc70-1	0.464233	-0.941757	1.43712	0.51227	NA
FBgn0001217	Hsc70-2	8.44222	0.397494	0.294	0.176368	0.53842
FBgn0001218	Hsc70-3	14.3451	0.227082	0.255724	0.374543	0.723907
FBgn0001220	Hsc70-5	12.0814	0.0380719	0.0524833	0.468201	0.777799
FBgn0001222	Hsf	10.9767	-0.0103806	0.0517707	0.841081	0.950893
FBgn0001224	Hsp23	15.5308	0.251015	0.220769	0.255536	0.628238
FBgn0001225	Hsp26	13.0168	-0.228388	0.407226	0.574907	0.834498
FBgn0001226	Hsp27	15.5739	0.223918	0.182167	0.218999	0.585347
FBgn0001227	Hsp67Ba	12.6655	0.102125	0.185634	0.582222	0.838875
FBgn0001229	Hsp67Bc	6.27722	-1.97608	0.723358	0.00629865	0.095207
FBgn0001230	Hsp68	10.6428	-1.33359	0.804925	0.0975622	0.412966
FBgn0001233	Hsp83	15.7348	-0.0247171	0.183973	0.893125	0.968704
FBgn0001234	lncRNA:Hsromega	11.2025	-0.0172639	0.256645	0.946369	0.983732
FBgn0001235	hth	13.3779	-0.0499504	0.097859	0.609749	0.851398
FBgn0001247	Ide	10.5984	-0.0021235	0.0612478	0.972342	0.992152
FBgn0001248	Idh	13.5742	0.134971	0.0565422	0.0169822	0.165368
FBgn0001250	if	10.992	-0.0629598	0.128104	0.62309	0.856761
FBgn0001253	ImpE1	12.4147	0.38262	0.613747	0.533011	0.808551
FBgn0001254	ImpE2	15.967	0.249895	0.38375	0.514923	0.799233
FBgn0001255	ImpE3	11.4676	0.40153	0.419187	0.338125	0.699017
FBgn0001256	ImpL1	5.14333	0.539863	0.754159	0.474085	0.781059
FBgn0001257	ImpL2	8.45185	0.442808	0.204375	0.030262	0.229607
FBgn0001258	Ldh	8.6906	-0.330785	0.400817	0.409215	0.747668
FBgn0001259	in	10.4291	-0.186595	0.0749087	0.0127397	0.139317
FBgn0001263	inaD	4.7441	0.0626657	0.340883	0.854144	0.955454
FBgn0001269	inv	11.0796	-0.00897415	0.0853992	0.916309	0.976131
FBgn0001276	ix	8.47553	-0.243041	0.122286	0.0468701	0.288432
FBgn0001280	janA	11.0918	-0.0080863	0.07103	0.909362	0.974741
FBgn0001281	janB	0.558124	0.393913	1.32704	0.766591	NA
FBgn0001285	Jon44E	1.30024	3.78868	5.06548	0.454496	NA
FBgn0001291	Jra	9.83422	-0.0290682	0.0927923	0.754083	0.916115
FBgn0001296	kar	8.61778	0.305467	0.179384	0.0885929	0.393724
FBgn0001297	kay	11.1456	-0.0390392	0.0823113	0.635295	0.862396
FBgn0001301	kel	11.0794	-0.0553941	0.0729293	0.447518	0.766484
FBgn0001308	Khc	12.0507	0.070677	0.0929161	0.446864	0.766484
FBgn0001311	kkv	12.6862	-0.108916	0.0883681	0.217752	0.584072
FBgn0001316	klar	13.4813	-0.0462588	0.108128	0.668785	0.87697
FBgn0001319	kn	9.68076	0.238449	0.140501	0.0896713	0.395762
FBgn0001320	kni	9.7804	0.0285412	0.085473	0.738439	0.90905
FBgn0001321	knk	10.8941	0.0755029	0.0853206	0.376193	0.724978
FBgn0001323	knrl	8.91921	0.184242	0.115708	0.111317	0.441502
FBgn0001324	kto	11.673	-0.133024	0.119836	0.26698	0.638235
FBgn0001325	Kr	2.24081	-5.07581	1.86791	0.00658022	0.0979564
FBgn0001330	kz	9.55077	-0.0366212	0.0767897	0.633432	0.861153
FBgn0001341	Mybbp1A	10.6659	-0.158229	0.0818498	0.0532153	0.306542
FBgn0001404	egh	10.0309	0.0111763	0.0980899	0.909286	0.974741
FBgn0001491	l(1)10Bb	9.76885	0.136992	0.0739726	0.0640366	0.337569
FBgn0001565	Hlc	10.9251	-0.0633376	0.0763311	0.406666	0.745279
FBgn0001612	Grip91	10.0753	-0.0870637	0.0727651	0.2315	0.599734
FBgn0001624	dlg1	11.898	-0.0736687	0.098391	0.454018	0.76959
FBgn0001941	ifc	10.1799	0.0960001	0.0460886	0.037256	0.258207
FBgn0001942	eIF4A	15.7635	-0.0147655	0.0638373	0.817083	0.943365
FBgn0001961	Arpc1	11.4432	0.265535	0.0608295	1.26985e-05	0.000783669
FBgn0001965	Sos	11.0635	-0.184369	0.131666	0.161431	0.517915
FBgn0001967	NimC3	6.31441	0.952256	0.386918	0.0138499	0.14586
FBgn0001970	Pgant35A	8.73828	0.0730618	0.115907	0.528465	0.807502
FBgn0001977	CIAPIN1	10.4372	-0.0560762	0.0700257	0.423251	0.753394
FBgn0001978	stc	11.2086	-0.106265	0.0546011	0.0516303	0.303283
FBgn0001981	esg	10.2162	0.118976	0.0758194	0.1166	0.452513
FBgn0001983	wor	2.58564	0.129451	0.626455	0.83629	0.950589
FBgn0001986	Mtr4	10.4737	0.0365509	0.0705564	0.604431	0.84813
FBgn0001987	Gli	12.1553	-0.00400333	0.114484	0.972105	0.992152
FBgn0001989	ND-B17	10.328	-0.167799	0.0929793	0.0711236	0.355581
FBgn0001990	wek	8.88122	0.0893779	0.0712226	0.209512	0.573922
FBgn0001991	Ca-alpha1D	1.79204	-1.22319	1.24203	0.324708	0.688726
FBgn0001992	Cyp303a1	3.2698	0.0924063	0.438116	0.832952	0.950137
FBgn0001994	crp	12.2109	-0.0953433	0.0871096	0.273726	0.643414
FBgn0001995	mRpL4	9.40989	-0.150454	0.0847233	0.0757607	0.368497
FBgn0002021	l(2)37Bb	8.66435	-0.136759	0.099358	0.16869	0.52775
FBgn0002022	Catsup	11.4027	0.0675874	0.0622841	0.277856	0.648242
FBgn0002031	l(2)37Cc	12.0841	0.104912	0.0645488	0.104096	0.425742
FBgn0002036	CG10561	6.89195	0.191765	0.134894	0.155143	0.511171
FBgn0002044	swm	11.345	0.0457946	0.0870102	0.598671	0.845807
FBgn0002069	AspRS	12.2116	0.0496538	0.0396748	0.210744	0.575221
FBgn0002121	l(2)gl	12.7595	-0.0913136	0.0923774	0.322915	0.687413
FBgn0002174	CG5504	10.062	0.617024	0.0841661	2.28394e-13	5.53024e-11
FBgn0002183	dre4	12.8588	0.00701245	0.0658596	0.915205	0.976131
FBgn0002283	l(3)73Ah	9.53728	0.0223878	0.0698195	0.748474	0.914129
FBgn0002284	Prosbeta6	11.7035	0.171508	0.0835817	0.0401715	0.2688
FBgn0002306	sas	12.2901	-0.147251	0.107851	0.172155	0.533612
FBgn0002354	l(3)87Df	6.68718	-0.209838	0.158704	0.186103	0.547513
FBgn0002413	dco	12.1597	0.00385989	0.0656601	0.953123	0.985572
FBgn0002431	hyd	12.5708	-0.0538887	0.112404	0.631639	0.860581
FBgn0002440	l(3)mbn	0.513122	-4.39195	2.0548	0.0325648	NA
FBgn0002441	l(3)mbt	10.4804	-0.114652	0.0823436	0.163815	0.520998
FBgn0002466	sti	12.113	-0.0671388	0.123392	0.586367	0.841181
FBgn0002521	pho	11.3739	0.0923459	0.0631562	0.143691	0.496691
FBgn0002522	lab	2.0162	0.687111	1.05512	0.514907	0.799233
FBgn0002524	lace	10.3029	0.0219334	0.0693813	0.751905	0.915299
FBgn0002525	Lam	13.982	0.0995547	0.0615827	0.105964	0.42992
FBgn0002526	LanA	13.4382	-0.00651691	0.100697	0.948398	0.984107
FBgn0002531	Lcp1	8.88121	-3.403	1.28796	0.00823781	0.109344
FBgn0002533	Lcp2	7.07498	-3.09111	0.883034	0.000464282	0.0155082
FBgn0002534	Lcp3	5.9124	-3.13831	1.65002	0.0571736	0.317861
FBgn0002535	Lcp4	7.88793	-3.10461	1.24496	0.0126407	0.138861
FBgn0002542	lds	11.3159	0.0395847	0.0751675	0.598458	0.845807
FBgn0002543	robo2	12.2402	-0.271382	0.167914	0.106053	0.42992
FBgn0002552	lin	10.3399	0.0555138	0.0892032	0.533725	0.808943
FBgn0002561	l(1)sc	1.45885	-0.631316	0.933448	0.498833	0.791036
FBgn0002562	Lsp1alpha	9.94924	-1.75241	1.32006	0.184334	0.546181
FBgn0002563	Lsp1beta	11.4315	-3.54989	1.35058	0.00857831	0.111969
FBgn0002564	Lsp1gamma	11.0847	-1.23745	1.31977	0.348437	0.706277
FBgn0002565	Lsp2	11.5039	-3.915	1.33934	0.00346577	0.0631914
FBgn0002566	lt	10.9991	0.0413008	0.0675652	0.541019	0.812908
FBgn0002567	Rab32	8.50977	-0.755238	0.290967	0.00944229	0.117588
FBgn0002573	sens	7.1852	0.1091	0.239414	0.648608	0.866611
FBgn0002576	lz	2.31683	0.0722515	0.683229	0.915781	0.976131
FBgn0002577	m	6.8749	0.81676	0.905807	0.36722	0.719951
FBgn0002578	Kaz-m1	0.418952	1.81882	1.74521	0.297331	NA
FBgn0002579	RpL36	14.9225	0.0742265	0.0816283	0.36318	0.715359
FBgn0002590	RpS5a	15.6556	0.0349198	0.0769628	0.650028	0.8676
FBgn0002592	E(spl)m2-BFM	10.0966	-0.215379	0.175938	0.220887	0.586994
FBgn0002593	RpLP1	15.3493	0.231132	0.0961301	0.0162007	0.16149
FBgn0002609	E(spl)m3-HLH	10.0514	-0.37654	0.0905123	3.18107e-05	0.0017319
FBgn0002622	RpS3	15.4226	0.0289668	0.0763446	0.704375	0.892855
FBgn0002626	RpL32	14.9463	-0.0534951	0.104852	0.609914	0.851507
FBgn0002629	E(spl)m4-BFM	9.32981	-0.0362499	0.132039	0.78367	0.92741
FBgn0002631	E(spl)m5-HLH	4.64661	0.864854	0.301963	0.00418185	0.0719679
FBgn0002632	E(spl)m6-BFM	8.24416	-0.3314	0.14615	0.0233574	0.197921
FBgn0002633	E(spl)m7-HLH	9.45472	-0.0753128	0.113437	0.506742	0.794813
FBgn0002638	Rcc1	11.8678	0.115284	0.0828071	0.163862	0.520998
FBgn0002641	mal	9.34458	0.0299398	0.0701117	0.669357	0.877117
FBgn0002643	mam	11.7456	-0.0375741	0.180664	0.835246	0.950589
FBgn0002645	Map205	12.9317	-0.0107349	0.0837802	0.898045	0.969745
FBgn0002673	twe	7.04789	0.0472224	0.189388	0.803097	0.936591
FBgn0002707	mei-9	9.48771	-0.0275064	0.0845283	0.74487	0.91198
FBgn0002709	mei-218	6.23995	0.202092	0.241347	0.402396	0.742067
FBgn0002715	mei-S332	8.61869	-0.0528837	0.0970816	0.585936	0.841181
FBgn0002716	mei-W68	3.32419	0.66394	0.597159	0.266211	0.637822
FBgn0002719	Men	9.9182	0.270972	0.100797	0.00718181	0.10143
FBgn0002723	Met	8.90278	-0.125358	0.107256	0.242495	0.610908
FBgn0002732	E(spl)malpha-BFM	11.3281	0.0692867	0.124378	0.577482	0.836502
FBgn0002733	E(spl)mbeta-HLH	11.1083	0.000289966	0.110397	0.997904	0.999189
FBgn0002734	E(spl)mdelta-HLH	9.00468	-0.309469	0.102261	0.00247598	0.0511509
FBgn0002735	E(spl)mgamma-HLH	7.03102	0.0445287	0.220506	0.839965	0.950893
FBgn0002736	mago	10.9995	0.201924	0.0783322	0.00994351	0.120278
FBgn0002772	Mlc1	3.00718	-2.93281	1.00087	0.00338693	0.0623877
FBgn0002773	Mlc2	6.65415	-1.89468	0.312967	1.4136e-09	2.07521e-07
FBgn0002774	mle	11.2829	0.048472	0.062361	0.436994	0.76214
FBgn0002775	msl-3	9.44425	0.0248253	0.0837329	0.766862	0.921166
FBgn0002778	mnd	9.91943	0.289988	0.160439	0.0706891	0.354507
FBgn0002780	mod	13.2718	0.0684152	0.0780687	0.380842	0.728734
FBgn0002781	mod(mdg4)	13.2997	0.0462812	0.0510628	0.364746	0.717242
FBgn0002783	mor	12.8779	0.0244382	0.0718721	0.733838	0.90714
FBgn0002787	Rpn8	11.738	0.160862	0.0789054	0.0414827	0.273791
FBgn0002789	Mp20	3.86509	-2.25105	0.788555	0.00430839	0.0725983
FBgn0002791	mr	10.1105	-0.0575773	0.0605795	0.341887	0.701789
FBgn0002838	ms(3)K81	-1.14623	-0.679457	3.6577	0.852632	NA
FBgn0002862	Mst87F	0.924605	0.174513	1.08368	0.872065	NA
FBgn0002863	Acp95EF	2.033	0.140735	0.848907	0.868327	0.960852
FBgn0002868	MtnA	5.54099	0.235779	0.311242	0.448726	0.766927
FBgn0002869	MtnB	2.19145	2.22325	1.18283	0.0601625	0.325287
FBgn0002872	mu2	10.3468	-0.0786587	0.106825	0.461527	0.774343
FBgn0002873	mud	11.8709	-0.0812955	0.0920451	0.377121	0.725395
FBgn0002878	mus101	9.66627	-0.0959983	0.110559	0.38523	0.730266
FBgn0002887	mus201	9.28586	-0.461089	0.112001	3.84143e-05	0.00202281
FBgn0002891	DNApol-zeta	9.00195	-0.205036	0.138655	0.139206	0.49175
FBgn0002899	mus301	9.01898	0.0838737	0.0992001	0.397832	0.740018
FBgn0002901	mus304	8.40277	-0.184336	0.0831293	0.0265917	0.214214
FBgn0002905	DNApol-theta	9.7033	-0.0317992	0.108608	0.769684	0.922611
FBgn0002906	Blm	10.1324	-0.205116	0.105001	0.0507642	0.301593
FBgn0002917	na	1.05792	2.79536	1.48185	0.0592402	NA
FBgn0002921	Atpalpha	13.724	0.0335717	0.0485738	0.489472	0.787241
FBgn0002922	nau	4.35878	0.243172	0.32082	0.44847	0.766927
FBgn0002924	ncd	11.4221	-0.00893842	0.0985858	0.927758	0.97824
FBgn0002926	ndl	-1.26512	-1.41222	3.61987	0.69644	NA
FBgn0002930	nec	4.65019	-0.81237	0.608738	0.182035	0.545207
FBgn0002931	net	8.8144	0.0438795	0.112972	0.697712	0.890292
FBgn0002932	neur	8.92731	0.0620377	0.107391	0.56348	0.82683
FBgn0002936	ninaA	0.405696	-0.670854	1.57478	0.67011	NA
FBgn0002938	ninaC	5.30982	-0.259383	0.272981	0.342016	0.701789
FBgn0002939	ninaD	2.01618	-4.85055	1.28733	0.00016461	0.00660705
FBgn0002941	slou	0.639388	-1.64746	1.4276	0.248496	NA
FBgn0002945	nkd	12.0539	-0.0213134	0.104988	0.839128	0.950802
FBgn0002948	nod	9.68106	0.0217977	0.0841813	0.795683	0.933351
FBgn0002962	nos	2.72424	-0.589259	0.72185	0.414318	0.750993
FBgn0002973	numb	12.1271	0.0107415	0.0593706	0.856428	0.956791
FBgn0002985	odd	8.01643	0.209019	0.117377	0.0749527	0.366221
FBgn0002989	okr	8.61737	-0.0516821	0.0912708	0.571224	0.831268
FBgn0003002	opa	8.91842	0.11368	0.098046	0.24627	0.616408
FBgn0003008	or	8.9234	0.256683	0.0778314	0.00097397	0.0271954
FBgn0003009	ord	-0.715176	-1.99574	2.70406	0.460482	NA
FBgn0003016	osp	9.57635	-0.231723	0.160042	0.147648	0.500603
FBgn0003023	otu	0.737551	-2.45828	1.40995	0.081242	NA
FBgn0003028	ovo	12.0512	-0.0468836	0.119656	0.695193	0.889439
FBgn0003041	pbl	11.4148	-0.21297	0.0851954	0.0124269	0.137784
FBgn0003042	Pc	9.06597	0.0547549	0.0695364	0.431032	0.759333
FBgn0003044	Pcl	11.1703	-0.0546693	0.0869739	0.52963	0.807502
FBgn0003046	Pcp	4.67299	-1.87464	0.967571	0.0526881	0.306052
FBgn0003048	pcx	10.6023	-0.274316	0.166077	0.0985885	0.415063
FBgn0003053	peb	7.10557	-0.101348	0.230219	0.659773	0.872702
FBgn0003060	CG9757	3.66223	-14.6386	3.21562	NA	NA
FBgn0003062	Fib	12.3325	0.0547779	0.0845737	0.517182	0.800954
FBgn0003065	CG2150	2.80436	-1.6559	0.639859	0.00965569	0.118756
FBgn0003068	per	2.02982	0.375639	0.799475	0.638457	0.863623
FBgn0003071	Pfk	11.8359	-0.0746603	0.0685152	0.27585	0.645582
FBgn0003074	Pgi	11.5164	-0.00475459	0.062587	0.939445	0.982543
FBgn0003076	Pgm1	9.44125	-0.125607	0.0754111	0.0957872	0.40916
FBgn0003079	Raf	10.244	0.0836082	0.0635966	0.188623	0.549314
FBgn0003082	phr	8.51128	-0.0231671	0.120631	0.847703	0.952614
FBgn0003086	Pig1	-1.10107	0.763198	5.04796	0.879826	NA
FBgn0003087	pim	9.74782	-0.0381373	0.0922698	0.679369	0.881997
FBgn0003089	pip	9.04727	0.0280773	0.193438	0.884594	0.965401
FBgn0003090	pk	11.1422	-0.00884136	0.112227	0.937207	0.981674
FBgn0003091	Pkc53E	3.68785	-1.28974	0.851242	0.129741	0.475798
FBgn0003093	Pkc98E	11.0181	-0.0308059	0.0813716	0.704998	0.8931
FBgn0003116	pn	6.81586	-0.0483174	0.142561	0.734667	0.907932
FBgn0003117	pnr	9.80539	-0.0843144	0.0701466	0.229374	0.596137
FBgn0003118	pnt	9.77623	-0.0654711	0.100003	0.512665	0.79833
FBgn0003124	polo	12.8519	0.01656	0.0426413	0.697753	0.890292
FBgn0003129	Poxm	0.750886	-1.80449	1.42437	0.205203	NA
FBgn0003130	Poxn	7.99213	0.159395	0.109498	0.145481	0.498411
FBgn0003134	Pp1alpha-96A	10.3743	0.0200175	0.065685	0.760557	0.919629
FBgn0003137	Ppn	13.1743	0.128971	0.236716	0.585868	0.841181
FBgn0003139	PpV	10.3142	0.0167622	0.047988	0.726864	0.903071
FBgn0003141	pr	9.75758	0.147379	0.0826247	0.0744694	0.364595
FBgn0003149	Prm	4.18795	-1.18482	0.686631	0.0844281	0.387662
FBgn0003159	CG2841	7.66391	-0.295183	0.140503	0.0356497	0.252678
FBgn0003162	Pu	7.87957	0.219239	0.162182	0.176436	0.53842
FBgn0003165	pum	12.321	-0.0184069	0.129192	0.886703	0.966397
FBgn0003169	put	11.5947	0.0519481	0.043204	0.229212	0.596004
FBgn0003174	pwn	11.1779	-0.216798	0.145788	0.136994	0.488349
FBgn0003175	px	10.8915	-0.0905896	0.119421	0.448107	0.766768
FBgn0003187	qua	3.61894	0.813406	0.568684	0.152622	0.506618
FBgn0003189	r	11.8709	-0.208812	0.0998877	0.0365754	0.256611
FBgn0003204	ras	11.848	0.0292109	0.0570724	0.608775	0.850985
FBgn0003205	Ras85D	12.197	0.0616313	0.0423662	0.145745	0.498411
FBgn0003206	Ras64B	10.6516	0.72407	0.0515072	6.91442e-45	1.11656e-41
FBgn0003209	raw	10.2461	-0.0458174	0.0965657	0.635166	0.862396
FBgn0003210	rb	11.1919	0.0122556	0.0890019	0.890477	0.968505
FBgn0003218	rdgB	7.78329	-0.220955	0.175485	0.207991	0.573093
FBgn0003227	rec	8.89894	0.166186	0.0949017	0.0799215	0.37572
FBgn0003231	ref(2)P	10.8857	-0.128363	0.053118	0.015668	0.158298
FBgn0003250	Rh4	1.54654	-0.634016	0.965125	0.511228	0.797686
FBgn0003255	rk	6.20111	-0.95155	0.349201	0.00643151	0.0967623
FBgn0003256	rl	10.5537	-0.144325	0.0880038	0.101008	0.420392
FBgn0003257	r-l	10.4714	0.0614915	0.0662855	0.353576	0.708394
FBgn0003261	Rm62	15.5946	-0.192962	0.0924386	0.0368469	0.257397
FBgn0003267	ro	-1.25199	0.755634	2.41581	0.754442	NA
FBgn0003268	rod	11.4082	-0.220452	0.122649	0.0722681	0.358715
FBgn0003274	RpLP2	15.3802	0.103976	0.102737	0.31151	0.680265
FBgn0003275	RpII18	10.727	0.180518	0.0895655	0.0438542	0.280233
FBgn0003277	RpII215	12.5876	0.0711168	0.0911282	0.435153	0.76214
FBgn0003278	RpI135	10.0528	-0.070679	0.0791461	0.371847	0.723313
FBgn0003279	RpL4	16.1832	0.0183374	0.0671692	0.784851	0.927862
FBgn0003285	rst	10.0094	-0.0756487	0.0821102	0.35689	0.710977
FBgn0003292	rt	9.53763	0.425226	0.236086	0.0716789	0.35741
FBgn0003295	ru	3.84564	0.0573089	0.547108	0.916575	0.976131
FBgn0003300	run	0.0554388	1.42866	1.79164	0.425217	NA
FBgn0003301	rut	10.6443	-0.120096	0.13908	0.387859	0.732449
FBgn0003302	rux	8.38414	0.114794	0.100877	0.255137	0.627685
FBgn0003308	ry	4.88219	-0.345453	0.434383	0.426454	0.755239
FBgn0003310	S	10.9202	0.0677335	0.086049	0.431194	0.759333
FBgn0003312	sad	6.32649	0.384257	0.700065	NA	NA
FBgn0003317	sax	10.6552	-0.0276489	0.0503049	0.582576	0.838968
FBgn0003319	Sb	10.7401	0.419637	0.309086	0.174567	0.53638
FBgn0003321	sbr	11.0773	-0.0904487	0.0505883	0.073786	0.362716
FBgn0003326	sca	10.4538	0.103964	0.102267	0.309345	0.678029
FBgn0003330	Sce	9.82501	0.0880761	0.0806383	0.274729	0.644048
FBgn0003334	Scm	10.8772	-0.0589239	0.0899989	0.512649	0.79833
FBgn0003339	Scr	2.87833	0.530239	0.55503	0.339409	0.699777
FBgn0003345	sd	12.8864	-0.0514903	0.0956448	0.590336	0.842588
FBgn0003346	RanGAP	11.8174	0.0901468	0.0902385	0.317802	0.683972
FBgn0003353	sei	9.16123	0.0388092	0.0813207	0.633194	0.861153
FBgn0003356	Jon99Cii	3.6919	5.23354	1.7531	0.00283299	0.0547917
FBgn0003357	Jon99Ciii	3.80803	4.79887	1.78246	0.00709654	0.100967
FBgn0003358	Jon99Ci	-0.671205	1.37104	2.33469	0.557037	NA
FBgn0003360	sesB	14.6175	0.0991967	0.049744	0.0461365	0.287825
FBgn0003366	sev	2.91769	-1.04181	0.991114	0.293191	0.665275
FBgn0003371	sgg	12.0091	-0.0831365	0.130853	0.525206	0.805837
FBgn0003372	Sgs1	4.92613	-2.51087	4.99197	NA	NA
FBgn0003373	Sgs3	7.96496	-1.705	1.77399	NA	NA
FBgn0003374	Sgs4	6.7304	-1.48683	1.89603	NA	NA
FBgn0003375	Sgs5	7.21991	-1.90534	2.10803	NA	NA
FBgn0003377	Sgs7	8.82375	-1.49675	1.72028	NA	NA
FBgn0003378	Sgs8	7.34063	-1.79983	1.81425	NA	NA
FBgn0003380	Sh	1.51447	1.13062	1.01682	0.266172	0.637822
FBgn0003382	sha	4.06158	0.952512	0.800372	0.234012	0.602377
FBgn0003386	Shaw	0.0193846	0.0670667	1.73965	0.969248	NA
FBgn0003388	shd	5.87024	-0.278918	0.261466	0.286087	0.658432
FBgn0003390	shf	11.5524	0.00383238	0.0695411	0.956051	0.987125
FBgn0003391	shg	13.3336	0.0484888	0.116743	0.677889	0.881511
FBgn0003392	shi	11.6928	-0.0403744	0.088814	0.649401	0.867106
FBgn0003396	shn	11.4752	-0.106117	0.149227	0.477016	0.782413
FBgn0003401	shu	8.03331	0.0076965	0.118882	0.94838	0.984107
FBgn0003410	sina	11.0612	0.0153931	0.0624435	0.805286	0.937532
FBgn0003411	sisA	0.11859	0	5.20139	1	NA
FBgn0003415	skd	11.7073	-0.0512806	0.129665	0.692484	0.888085
FBgn0003416	sl	9.79613	-0.140777	0.109416	0.198225	0.561251
FBgn0003423	slgA	11.3621	0.15011	0.112597	0.182479	0.545207
FBgn0003429	slo	0.652195	0.383038	1.35444	0.777329	NA
FBgn0003435	sm	9.21145	0.392446	0.892123	0.660009	0.872775
FBgn0003444	smo	11.2254	0.0371083	0.0494167	0.452697	0.768935
FBgn0003447	sn	12.8363	0.156086	0.138158	0.258575	0.631278
FBgn0003448	sna	1.07057	1.47559	1.24109	0.234461	NA
FBgn0003449	snf	10.7367	0.0504604	0.0820732	0.538672	0.811441
FBgn0003459	stwl	9.28275	-0.019136	0.141796	0.892648	0.968704
FBgn0003460	so	8.32049	-0.0274971	0.129765	0.832185	0.949997
FBgn0003462	Sod1	12.2259	-0.000232377	0.0894016	0.997926	0.999189
FBgn0003463	sog	10.5674	-0.157653	0.114598	0.168913	0.527934
FBgn0003464	sol	11.5568	-0.208883	0.102445	0.0414521	0.273791
FBgn0003475	spir	7.60181	-0.687953	0.179819	0.000130341	0.00546699
FBgn0003479	spn-A	8.67428	0.108553	0.0863372	0.208638	0.57353
FBgn0003480	spn-B	7.17605	0.00869851	0.209274	0.966845	0.991193
FBgn0003482	spn-D	5.78454	0.0790571	0.215779	0.714081	0.897721
FBgn0003483	spn-E	6.363	-0.0232584	0.227967	0.918737	0.976131
FBgn0003486	spo	0.216122	-0.333556	1.53426	0.827893	NA
FBgn0003495	spz	7.08864	0.251952	0.198579	0.20452	0.568893
FBgn0003499	sr	8.61403	-0.106865	0.182255	0.557641	0.823084
FBgn0003502	Btk29A	12.0424	-0.0632509	0.0693731	0.361901	0.714141
FBgn0003507	srp	8.4364	0.412368	0.291274	0.156852	0.511868
FBgn0003512	Sry-delta	10.2495	0.130129	0.0799257	0.103498	0.424534
FBgn0003513	ss	9.39864	-0.21989	0.130658	0.0923863	0.401764
FBgn0003514	sqh	12.1876	0.103526	0.0628174	0.0993437	0.416684
FBgn0003515	st	3.57614	0.0896338	0.399266	0.822371	0.945284
FBgn0003517	sta	16.0869	0.00954175	0.0866979	0.912364	0.975773
FBgn0003520	stau	11.422	-0.187391	0.109917	0.0882247	0.393197
FBgn0003525	stg	11.5226	0.231968	0.0966897	0.0164354	0.162913
FBgn0003545	sub	9.97565	-0.00330519	0.126853	0.979213	0.99446
FBgn0003557	Su(dx)	10.663	-0.123784	0.0826184	0.134064	0.483302
FBgn0003559	su(f)	10.9617	0.000559993	0.050035	0.99107	0.997567
FBgn0003567	su(Hw)	11.4811	-0.0252923	0.0715638	0.723772	0.902298
FBgn0003575	su(sable)	11.1267	-0.019747	0.0892412	0.824877	0.94615
FBgn0003598	Su(var)3-7	11.3433	-0.0551002	0.0684851	0.421075	0.752569
FBgn0003607	Su(var)205	13.0306	0.190461	0.0714412	0.00767643	0.104756
FBgn0003612	Su(var)2-10	11.8033	0.00863948	0.0450235	0.84783	0.952614
FBgn0003638	su(w[a])	12.81	-0.219103	0.0849554	0.00990751	0.120278
FBgn0003651	svp	9.17465	-0.163808	0.135342	0.226153	0.592161
FBgn0003654	sw	9.84622	-0.0595124	0.104071	0.567427	0.828981
FBgn0003655	swa	-0.627495	-2.35072	2.58313	0.362808	NA
FBgn0003656	sws	10.1572	-0.141647	0.0801512	0.077186	0.372438
FBgn0003660	Syb	12.1268	0.13999	0.0518937	0.00698332	0.0997955
FBgn0003676	CCT1	13.0209	0.101727	0.0688448	0.139507	0.492061
FBgn0003687	Tbp	9.59077	0.0813741	0.0733273	0.267111	0.638235
FBgn0003701	thr	9.55604	0.138235	0.0998603	0.166272	0.524993
FBgn0003710	tipE	3.26175	-2.09547	0.800569	0.00885838	0.114442
FBgn0003714	tko	9.67426	0.0506188	0.107677	0.638284	0.863623
FBgn0003716	tkv	13.2013	-0.00969436	0.0779091	0.900974	0.970907
FBgn0003719	tld	10.1309	-0.411736	0.152868	0.00707271	0.100776
FBgn0003721	Tm1	13.5245	0.0421755	0.0541281	0.435874	0.76214
FBgn0003731	Egfr	12.912	-0.0150285	0.0890903	0.866042	0.959586
FBgn0003733	tor	2.16345	2.67668	0.913368	0.00338357	0.0623877
FBgn0003741	tra	9.03922	0.048565	0.103232	0.638036	0.863623
FBgn0003742	tra2	10.2646	-0.0313473	0.0672207	0.640976	0.864599
FBgn0003744	trc	10.9498	0.0381176	0.0512413	0.456946	0.771704
FBgn0003747	Gr5a	9.8343	-0.105536	0.349881	0.762931	0.920277
FBgn0003748	Treh	10.2796	-0.109094	0.0946318	0.24898	0.619827
FBgn0003751	trk	1.54364	0.188104	1.13921	0.868851	0.96088
FBgn0003862	trx	12.3891	-0.091216	0.141092	0.517957	0.801162
FBgn0003863	alphaTry	2.55994	0.59595	2.16069	NA	NA
FBgn0003866	tsh	12.5473	-0.101581	0.0620626	0.101681	0.420842
FBgn0003867	tsl	10.2404	0.191912	0.0682552	0.00492835	0.0798509
FBgn0003870	ttk	12.1606	0.193836	0.105704	0.0666891	0.344026
FBgn0003882	tub	10.4177	0.0430171	0.0511886	0.400704	0.741732
FBgn0003884	alphaTub84B	16.1892	0.20817	0.106767	0.0512057	0.303042
FBgn0003885	alphaTub84D	12.3155	0.256802	0.0762052	0.000752028	0.0222826
FBgn0003886	alphaTub85E	5.02975	-0.625209	0.545017	0.251325	0.622624
FBgn0003888	betaTub60D	12.9621	0.380817	0.276437	0.16833	0.527489
FBgn0003890	betaTub97EF	8.404	0.00957233	0.224412	0.965976	0.990617
FBgn0003891	tud	12.8436	-0.180995	0.134376	0.178002	0.540139
FBgn0003892	ptc	11.5129	0.0118844	0.104207	0.909201	0.974741
FBgn0003896	tup	9.25481	-0.0582004	0.0804011	0.469142	0.778658
FBgn0003900	twi	9.41508	-0.0405079	0.0961264	0.673461	0.879047
FBgn0003930	snRNA:U4:39B	1.44178	-2.67327	1.32487	0.0436163	0.279807
FBgn0003941	RpL40	14.7134	-0.0152344	0.0754306	0.839944	0.950893
FBgn0003942	RpS27A	15.6333	0.0742009	0.0677323	0.273297	0.643337
FBgn0003943	Ubi-p63E	12.1666	0.0820465	0.0921977	0.373521	0.723782
FBgn0003944	Ubx	6.8144	-0.260499	0.260969	0.318183	0.683972
FBgn0003950	unc	6.46402	0.0818642	0.179122	0.647649	0.866127
FBgn0003963	ush	10.3425	0.0325636	0.132614	0.806029	0.937892
FBgn0003964	usp	10.6321	0.0368511	0.0615385	0.549286	0.81905
FBgn0003965	v	1.19953	-1.74082	2.41805	0.471568	NA
FBgn0003969	vap	11.5659	-0.0272196	0.0704104	0.699063	0.890862
FBgn0003975	vg	12.1445	-0.206106	0.0660714	0.00181192	0.0409161
FBgn0003977	vir	10.8347	0.0256317	0.115633	0.824575	0.94615
FBgn0003978	vls	9.44194	0.328976	0.0788191	2.99553e-05	0.00164907
FBgn0003984	vn	10.2943	-0.133317	0.0960281	0.165043	0.523096
FBgn0003996	w	3.65164	0.132995	0.742119	0.857773	0.957373
FBgn0003997	hid	10.6406	0.179144	0.109349	0.101363	0.420437
FBgn0004003	wbl	10.9378	0.185116	0.309425	0.549667	0.819468
FBgn0004034	y	2.10358	0.076365	0.828611	0.926571	0.977903
FBgn0004047	Yp3	2.67805	0.0771683	0.896355	0.931394	0.979397
FBgn0004049	yrt	11.4285	-0.0165694	0.0750817	0.825337	0.946242
FBgn0004050	z	10.8475	0.0630744	0.0630942	0.317462	0.683972
FBgn0004055	uzip	10.391	-0.0454818	0.0663769	0.493215	0.788054
FBgn0004057	Zw	9.07228	-0.189022	0.093836	0.0439693	0.280275
FBgn0004066	Prosalpha4	12.0058	0.139077	0.0713481	0.0512629	0.303042
FBgn0004087	Dhfr	9.28482	0.0739286	0.104389	0.47882	0.783003
FBgn0004101	bs	11.0206	0.0842899	0.136419	0.536658	0.810047
FBgn0004102	oc	1.05111	-1.15069	1.32841	0.386373	NA
FBgn0004103	Pp1-87B	13.4719	0.0376764	0.0331012	0.25503	0.627631
FBgn0004106	Cdk1	11.4395	0.186722	0.0890055	0.0359169	0.254151
FBgn0004107	Cdk2	10.2633	0.145363	0.0693956	0.0361972	0.254894
FBgn0004108	Nrt	11.3841	0.198415	0.19256	0.302819	0.671787
FBgn0004110	tin	1.32091	0.512462	1.05108	0.625865	NA
FBgn0004117	Tm2	3.9264	-2.36975	0.853614	0.0055009	0.0865231
FBgn0004118	nAChRbeta2	3.71091	0.388525	0.446656	0.384381	0.730007
FBgn0004132	boca	10.4011	0.109758	0.0783438	0.161219	0.517749
FBgn0004133	blow	11.4758	0.205898	0.0726745	0.00460909	0.0761812
FBgn0004167	kst	13.2191	-0.0860218	0.139729	0.538137	0.811066
FBgn0004168	5-HT1A	1.70103	-4.28543	1.33998	0.00138325	0.0341895
FBgn0004169	up	4.57638	-1.60621	0.708368	0.0233605	0.197921
FBgn0004170	sc	9.33611	0.280586	0.0902983	0.00188792	0.0418582
FBgn0004177	mts	13.6213	0.116846	0.0365873	0.00140502	0.0342903
FBgn0004179	Csp	11.7266	0.0685541	0.0574402	0.232678	0.6015
FBgn0004197	Ser	12.4138	-0.0379469	0.110579	0.731474	0.906066
FBgn0004198	ct	9.42158	-0.249715	0.193735	0.197414	0.560707
FBgn0004227	nonA	12.5846	0.0435616	0.0877123	0.619442	0.855197
FBgn0004228	mex1	0.27348	0.823269	2.14483	0.701098	NA
FBgn0004237	Hrb87F	13.6095	0.140225	0.0637667	0.0278756	0.220206
FBgn0004240	DptA	-0.361794	-2.39123	4.60307	0.603421	NA
FBgn0004242	Syt1	5.06193	-1.35309	0.922542	0.142459	0.49578
FBgn0004359	T48	9.84831	0.11437	0.0851978	0.179465	0.542505
FBgn0004360	Wnt2	10.0834	0.17695	0.189272	0.349839	0.707344
FBgn0004362	HmgD	14.8353	0.221826	0.0927957	0.0168267	0.164681
FBgn0004363	porin	13.7724	0.184383	0.0835109	0.0272519	0.217678
FBgn0004364	18w	12.0817	0.0698255	0.13087	0.593653	0.843736
FBgn0004367	mei-41	9.54298	-0.109451	0.135477	0.419155	0.751656
FBgn0004368	Ptp4E	10.9	-0.235025	0.105378	0.025727	0.209999
FBgn0004369	Ptp99A	10.8859	-0.0643177	0.111229	0.563097	0.826519
FBgn0004370	Ptp10D	11.6352	-0.168057	0.115199	0.144608	0.498105
FBgn0004373	fwd	11.6942	-0.0780528	0.107496	0.467778	0.777799
FBgn0004374	neb	9.73641	-0.133951	0.11944	0.262081	0.633718
FBgn0004378	Klp61F	11.555	-0.0969707	0.0862507	0.260891	0.63272
FBgn0004379	Klp67A	10.6642	-0.0155099	0.0746055	0.835313	0.950589
FBgn0004380	Klp64D	8.42342	-0.0932815	0.0867908	0.282471	0.653038
FBgn0004381	Klp68D	7.64669	0.116735	0.114799	0.309221	0.678029
FBgn0004387	Klp98A	10.605	-0.493822	0.130131	0.000147755	0.00604052
FBgn0004390	RasGAP1	10.9648	0.0479242	0.0948649	0.61343	0.853342
FBgn0004391	shtd	10.7092	-0.172215	0.115021	0.134326	0.48383
FBgn0004394	pdm2	10.0182	0.434009	0.0875498	7.14873e-07	6.41334e-05
FBgn0004395	unk	11.2423	-0.00853461	0.0807141	0.91579	0.976131
FBgn0004396	CrebA	11.2553	0.3722	0.271087	0.169755	0.529371
FBgn0004397	Vinc	11.0592	-0.0201356	0.0801624	0.801671	0.936169
FBgn0004400	rhi	1.10044	-0.269182	1.28009	0.833446	NA
FBgn0004401	Pep	14.2219	0.0351636	0.0515481	0.495143	0.788664
FBgn0004403	RpS14a	14.3575	-0.0151287	0.0657855	0.818115	0.943805
FBgn0004404	RpS14b	12.8143	-0.0102818	0.107413	0.923741	0.977629
FBgn0004406	tam	8.95243	-0.117892	0.0961251	0.220033	0.58607
FBgn0004419	me31B	12.673	0.195692	0.0658338	0.00295366	0.0565574
FBgn0004425	LysB	0.739582	-0.802263	1.78823	0.653695	NA
FBgn0004426	LysC	-1.05504	1.48633	4.24457	0.72621	NA
FBgn0004427	LysD	1.79277	1.5599	1.59403	0.327786	0.691187
FBgn0004428	LysE	-0.463307	-1.29038	2.97096	0.664049	NA
FBgn0004429	LysP	-0.798296	-3.90611	5.11837	0.445371	NA
FBgn0004430	LysS	2.09517	-2.7281	1.82853	0.135708	0.485824
FBgn0004431	LysX	1.43691	-0.679388	5.20139	0.896079	0.969445
FBgn0004432	Cyp1	14.9265	0.149325	0.0753564	0.0475264	0.289977
FBgn0004435	Galphaq	9.64635	-0.0862905	0.0675097	0.201181	0.563528
FBgn0004436	Ubc6	11.5612	0.0955016	0.05049	0.0585584	0.320006
FBgn0004449	Ten-m	12.7281	-0.0151701	0.132894	0.909118	0.974741
FBgn0004456	mew	11.9613	-0.0875676	0.0832405	0.292807	0.665184
FBgn0004463	RpIII128	10.059	0.0459053	0.0509631	0.367718	0.720317
FBgn0004465	Su(P)	9.28191	0.164206	0.0589547	0.00534781	0.0849425
FBgn0004507	GlyP	11.9154	-0.262447	0.145526	0.0713187	0.356373
FBgn0004509	Fur1	10.7859	-0.115116	0.0935532	0.218513	0.585016
FBgn0004510	Ets97D	9.4937	0.0107307	0.0806412	0.89414	0.968845
FBgn0004511	dy	6.52381	0.685963	0.470347	0.144725	0.498113
FBgn0004512	Mdr49	9.83354	-0.0785559	0.122748	0.522186	0.803749
FBgn0004513	Mdr65	3.45685	-0.713365	0.497793	0.151842	0.506202
FBgn0004552	Akh	3.14896	1.99538	1.22391	NA	NA
FBgn0004554	Edg91	5.91407	-1.2483	0.459818	0.0066322	0.0979564
FBgn0004556	Dbp73D	8.97906	0.106648	0.0946857	0.260025	0.632057
FBgn0004567	slp2	0.632611	0.142456	1.51108	0.924891	NA
FBgn0004569	aos	8.6867	0.380077	0.0990235	0.000123916	0.00522009
FBgn0004573	5-HT7	0.425814	1.3588	1.78468	0.446438	NA
FBgn0004574	Rop	11.3105	0.835841	0.100216	7.40209e-17	2.31351e-14
FBgn0004575	Syn	3.27733	-0.315167	0.512479	0.538565	0.811406
FBgn0004577	Pxd	5.06861	-1.2302	0.537874	0.0221867	0.192278
FBgn0004581	bgcn	4.0468	0.113007	0.428752	0.792109	0.932199
FBgn0004583	ex	13.1632	-0.0372333	0.116834	0.749965	0.914129
FBgn0004584	Rrp1	12.2947	0.0379599	0.067961	0.576466	0.835884
FBgn0004587	B52	13.9571	0.069572	0.0419047	0.0968658	0.411586
FBgn0004588	Eig71Ea	2.55276	-0.433415	4.93249	NA	NA
FBgn0004589	Eig71Eb	1.27854	1.22838	5.13621	NA	NA
FBgn0004590	Eig71Ec	1.69448	-2.0803	5.14866	NA	NA
FBgn0004591	Eig71Ed	1.09968	-1.34532	2.48316	NA	NA
FBgn0004592	Eig71Ee	5.79373	-0.338175	1.7617	NA	NA
FBgn0004593	Eig71Ef	0.715107	0	5.20139	NA	NA
FBgn0004594	Eig71Eg	0.430645	-0.679391	5.20139	0.896078	NA
FBgn0004595	pros	4.24054	0.183321	0.585517	0.75421	0.916115
FBgn0004597	CycC	9.41811	0.0396589	0.0687067	0.56379	0.826991
FBgn0004598	Fur2	12.1637	-0.139125	0.105058	0.185415	0.547376
FBgn0004606	zfh1	9.49191	-0.02744	0.200874	0.891344	0.968704
FBgn0004607	zfh2	13.2907	0.118524	0.118819	0.318511	0.683972
FBgn0004611	Plc21C	10.5288	-0.110196	0.0912599	0.227241	0.593545
FBgn0004618	gl	1.0009	-1.1278	1.65342	0.495177	NA
FBgn0004619	GluRIA	-0.67655	-2.91445	2.648	0.271061	NA
FBgn0004620	GluRIIA	0.742356	-0.928198	1.39913	0.507066	NA
FBgn0004622	TkR99D	0.21387	-0.679497	1.94381	0.726662	NA
FBgn0004629	Cys	5.61217	-0.493464	0.363448	0.17455	0.53638
FBgn0004635	rho	7.66423	0.351501	0.173885	0.0432324	0.279046
FBgn0004636	Rap1	12.245	0.0564458	0.0626595	0.367676	0.720317
FBgn0004638	drk	11.8735	0.111037	0.0456176	0.0149293	0.153723
FBgn0004643	Zw10	10.7216	-0.133953	0.0892979	0.133597	0.483175
FBgn0004644	hh	10.6725	0.0507598	0.0762723	0.505725	0.794539
FBgn0004646	ogre	13.4664	0.0464012	0.13774	0.736211	0.908752
FBgn0004647	N	13.692	-0.0718896	0.11887	0.545329	0.816086
FBgn0004648	svr	11.574	-0.105265	0.0999951	0.292478	0.665184
FBgn0004650	fs(1)N	1.07009	-1.22976	1.50464	0.413751	NA
FBgn0004652	fru	11.7387	-0.450317	0.349883	0.198076	0.561159
FBgn0004654	Pgd	10.5926	0.167531	0.0782631	0.0323052	0.2372
FBgn0004655	wapl	10.99	-0.0863675	0.120428	0.473268	0.780775
FBgn0004656	fs(1)h	13.3746	-0.165236	0.115377	0.152102	0.506374
FBgn0004657	mys	12.2923	-0.048486	0.0712408	0.49613	0.789371
FBgn0004687	Mlc-c	12.2088	0.185334	0.059545	0.0018551	0.0415106
FBgn0004698	Xpc	11.6599	-0.0881748	0.0768422	0.251184	0.622624
FBgn0004777	Ccp84Ag	1.66865	-2.43737	1.53635	0.112634	0.443869
FBgn0004780	Ccp84Ad	-0.959642	-0.37146	2.62354	0.887406	NA
FBgn0004782	Ccp84Ab	-0.453605	-3.27318	2.47477	0.185963	NA
FBgn0004783	Ccp84Aa	0.404172	-0.00668037	1.26415	0.995784	NA
FBgn0004795	retn	-0.264671	1.36898	1.99234	0.492006	NA
FBgn0004797	mdy	9.78115	-0.146951	0.114106	0.197799	0.560927
FBgn0004811	fs(2)ltoPP43	10.3115	0.143639	0.0550497	0.0090737	0.115223
FBgn0004828	His3.3B	14.699	0.0360288	0.0515624	0.484713	0.785348
FBgn0004832	Xpac	9.26566	0.157458	0.0844396	0.0622183	0.331993
FBgn0004837	Su(H)	9.45513	0.0434536	0.0633611	0.492834	0.787809
FBgn0004838	Hrb27C	14.9654	0.100823	0.0822365	0.220192	0.58607
FBgn0004839	otk	11.249	-0.096247	0.0908688	0.289515	0.662363
FBgn0004841	TkR86C	0.941761	-3.70505	1.30429	0.00450205	NA
FBgn0004852	Ac76E	4.93112	-0.113262	0.308825	0.713805	0.897606
FBgn0004854	B-H2	7.72114	0.000343911	0.140415	0.998046	0.999189
FBgn0004855	RpII15	10.1703	0.0724753	0.0658628	0.271159	0.641263
FBgn0004856	Bx42	11.0122	0.228431	0.0499945	4.89758e-06	0.00034637
FBgn0004858	elB	10.9951	-0.0320033	0.0676238	0.636031	0.862723
FBgn0004859	ci	13.1612	0.157534	0.0765682	0.039645	0.266901
FBgn0004860	ph-d	10.4913	-0.00672462	0.0849056	0.936873	0.981674
FBgn0004861	ph-p	11.2935	-0.0153571	0.0903383	0.865013	0.959267
FBgn0004863	C15	8.14318	-0.0720245	0.102104	0.480559	0.783525
FBgn0004864	hop	10.7391	-0.0746836	0.108332	0.490576	0.787241
FBgn0004865	Eip78C	10.0447	0.355797	0.453182	0.432389	0.759641
FBgn0004867	RpS2	15.5886	0.109781	0.0721902	0.12833	0.473133
FBgn0004868	Gdi	13.0301	0.121987	0.083892	0.145921	0.498411
FBgn0004870	bab1	4.99249	-0.374763	0.264498	0.156516	0.511868
FBgn0004872	piwi	4.42214	0.23763	0.449843	0.597326	0.845807
FBgn0004875	enc	11.4271	0.0100426	0.128286	0.937603	0.981674
FBgn0004876	cdi	10.9217	-0.116115	0.107254	0.27898	0.649924
FBgn0004878	cas	2.65536	0.60954	0.600382	0.309984	0.678437
FBgn0004880	scrt	6.57881	-1.76244	0.309466	1.23307e-08	1.59297e-06
FBgn0004882	orb	3.27022	-0.0655451	0.552075	0.905493	0.973408
FBgn0004885	tok	12.7001	-0.120823	0.0964074	0.210114	0.574596
FBgn0004888	Scsalpha1	11.8639	0.197626	0.0752151	0.00860217	0.112025
FBgn0004889	tws	12.5162	0.0582312	0.0689558	0.398406	0.740439
FBgn0004892	sob	9.85609	0.0419342	0.0804977	0.602411	0.847047
FBgn0004893	bowl	13.2837	0.0672608	0.0669736	0.31524	0.683454
FBgn0004897	fd96Ca	0.167706	1.30602	2.76434	0.636602	NA
FBgn0004898	fd96Cb	2.27945	0.742274	1.5517	0.632392	0.860916
FBgn0004901	Prat	10.5398	-0.0300657	0.0451598	0.505563	0.794539
FBgn0004903	Rb97D	10.7888	-0.0386347	0.0618914	0.532474	0.808268
FBgn0004907	14-3-3zeta	14.3941	0.183632	0.054997	0.000840949	0.0242289
FBgn0004908	Arl2	8.64183	0.0308839	0.0921173	0.737424	0.90905
FBgn0004910	Eip63F-1	4.97676	-1.27586	0.266914	1.7528e-06	0.000140354
FBgn0004913	Gnf1	10.9966	0.0264894	0.075174	0.724557	0.902308
FBgn0004914	Hnf4	9.86516	-0.134895	0.116531	0.247034	0.617378
FBgn0004915	TfIIB	10.446	0.0825602	0.0606227	0.173239	0.535185
FBgn0004919	gol	2.86346	0.268314	0.661479	0.685016	0.885031
FBgn0004921	Ggamma1	12.3039	-0.0413533	0.0723079	0.567386	0.828981
FBgn0004924	Top1	12.2362	0.00140245	0.103293	0.989167	0.997506
FBgn0004926	eIF2beta	12.614	0.173602	0.0906766	0.0555541	0.313491
FBgn0004956	upd1	7.74658	0.162158	0.126009	0.198136	0.561164
FBgn0004957	por	9.83057	-0.109324	0.0744841	0.142174	0.495545
FBgn0004959	phm	6.11065	0.689752	0.934109	NA	NA
FBgn0005198	gig	10.6054	-0.20127	0.0791677	0.0110119	0.128392
FBgn0005278	Sam-S	12.9215	-0.0847584	0.0719113	0.238537	0.607567
FBgn0005322	nmd	9.83659	0.00315306	0.0527746	0.952358	0.985334
FBgn0005355	Su(fu)	10.1733	0.100971	0.063732	0.113124	0.444815
FBgn0005386	ash1	10.37	-0.0201049	0.0956468	0.833512	0.950257
FBgn0005391	Yp2	1.94124	-0.262762	0.735614	0.720941	0.90142
FBgn0005411	U2af50	11.6847	0.0372451	0.0426812	0.382862	0.729842
FBgn0005427	ewg	11.0925	-0.151269	0.0900387	0.0929499	0.402589
FBgn0005533	RpS17	14.9872	0.0175649	0.0625204	0.778752	0.926213
FBgn0005536	Mbs	11.3526	-0.0995774	0.102202	0.329899	0.692537
FBgn0005558	ey	3.50747	0.456902	0.549317	0.405542	0.74446
FBgn0005561	sv	3.31404	0.737128	0.551175	0.1811	0.544222
FBgn0005564	Shal	4.0552	-0.207184	0.388262	0.593604	0.843736
FBgn0005585	Calr	14.5798	0.132811	0.096817	0.170135	0.530044
FBgn0005586	Rab3	3.10674	0.382318	0.705469	0.587864	0.841709
FBgn0005593	RpL7	15.6499	0.00879381	0.0672719	0.895997	0.969445
FBgn0005596	yem	10.216	-0.017995	0.0895843	0.840798	0.950893
FBgn0005612	Sox14	9.75209	0.119801	0.12421	0.334793	0.696571
FBgn0005613	Sox15	11.4631	-0.00784478	0.0754194	0.917157	0.976131
FBgn0005614	trpl	-1.02548	0.757616	2.23037	0.734097	NA
FBgn0005616	msl-2	9.45483	-0.0673172	0.136159	0.621022	0.855793
FBgn0005617	msl-1	10.514	0.0115652	0.085014	0.891791	0.968704
FBgn0005619	Hdc	2.97679	0.848346	1.57171	0.589362	0.842372
FBgn0005624	Psc	10.7037	0.142421	0.0988558	0.149672	0.504057
FBgn0005626	ple	5.38356	1.16284	1.19703	0.331332	0.694413
FBgn0005631	robo1	11.1142	-0.0586862	0.102479	0.566869	0.828693
FBgn0005632	faf	12.5563	-0.0249662	0.10308	0.808623	0.939325
FBgn0005633	fln	-0.574273	0.0418464	2.7384	0.987808	NA
FBgn0005636	nvy	8.62235	-0.170659	0.0897234	0.0571635	0.317861
FBgn0005638	slbo	0.999795	1.36711	1.54903	0.377473	NA
FBgn0005640	Eip63E	10.9642	-0.00652503	0.0772164	0.932656	0.979742
FBgn0005642	wdn	10.4409	-0.0955175	0.0776378	0.218586	0.585051
FBgn0005648	Pabp2	12.7709	0.119648	0.0745014	0.108278	0.435315
FBgn0005649	Rox8	12.6824	0.0662663	0.0635943	0.297404	0.669188
FBgn0005655	PCNA	12.0274	0.163727	0.103572	0.113924	0.446344
FBgn0005658	Ets65A	0.129707	-3.20142	1.64388	0.0514783	NA
FBgn0005659	Ets98B	7.71872	-0.194283	0.144743	0.17951	0.542505
FBgn0005660	Ets21C	5.90076	0.164319	0.287455	0.567571	0.829066
FBgn0005664	Crys	5.56474	-0.152554	0.666526	0.818963	0.944072
FBgn0005666	bt	4.52944	-1.07935	0.565213	0.0561804	0.315007
FBgn0005670	Cyp4d1	5.14226	-2.55536	1.48295	0.084859	0.388563
FBgn0005671	Vha55	11.8115	0.0359337	0.0396304	0.364553	0.717156
FBgn0005672	spi	12.1121	0.303498	0.0649299	2.95037e-06	0.000225087
FBgn0005674	GluProRS	12.567	0.0231366	0.077704	0.765891	0.921027
FBgn0005677	dac	9.23571	-0.0902206	0.139658	0.518273	0.801347
FBgn0005683	pie	8.12314	0.0852741	0.13325	0.522201	0.803749
FBgn0005694	Aef1	10.1663	0.0872053	0.0847837	0.303686	0.672397
FBgn0005695	gcl	8.60676	-0.150807	0.108223	0.163473	0.520827
FBgn0005696	DNApol-alpha73	8.82194	0.0437016	0.128837	0.734459	0.907791
FBgn0005771	noc	11.5805	0.0445618	0.0604409	0.460952	0.774301
FBgn0005775	Con	5.79538	0.295089	0.495324	0.551343	0.820343
FBgn0005777	PpD3	10.5646	0.139101	0.0763132	0.0683396	0.34799
FBgn0008635	betaCOP	12.4128	-0.0551136	0.108999	0.613114	0.853143
FBgn0008646	E5	10.0415	0.0662793	0.0948396	0.484642	0.785348
FBgn0008651	lbl	1.86542	-0.416091	0.993378	0.675315	0.88006
FBgn0010014	CanB	-0.787327	0.763178	2.04302	0.708736	NA
FBgn0010015	CanA1	-1.19504	-2.27032	4.1199	0.581591	NA
FBgn0010019	Cyp4g1	1.32827	-0.586566	0.949037	0.536533	NA
FBgn0010038	GstD2	2.05626	0.362539	0.783306	0.643485	0.866106
FBgn0010039	GstD3	9.17041	0.197611	0.140343	0.159114	0.515258
FBgn0010040	GstD4	1.29878	2.2869	1.06448	0.0316834	NA
FBgn0010041	GstD5	0.600131	0.644957	1.10293	0.558704	NA
FBgn0010042	GstD6	-1.28519	-0.083485	5.13347	0.987025	NA
FBgn0010051	Itpr	11.4796	-0.204789	0.151999	0.177882	0.540139
FBgn0010053	Jheh1	7.61467	-0.538151	0.226711	0.0176093	0.169375
FBgn0010078	RpL23	15.3843	0.187293	0.0855921	0.0286546	0.223358
FBgn0010097	gammaTub37C	0.968735	-2.14893	1.17805	0.0681313	NA
FBgn0010100	mAcon1	12.5532	0.0610736	0.0487898	0.210653	0.575221
FBgn0010105	comm	8.22224	-0.0708647	0.114522	0.536057	0.809769
FBgn0010109	dpn	8.76745	-0.0234721	0.151311	0.876722	0.963758
FBgn0010113	hdc	13.7681	-0.177962	0.181778	0.327576	0.691187
FBgn0010114	hig	1.3835	-0.681296	0.93251	0.465021	0.776557
FBgn0010173	RpA-70	11.659	0.180017	0.0764927	0.018603	0.173813
FBgn0010194	Wnt5	11.2007	-0.140573	0.0858252	0.101442	0.420448
FBgn0010197	Gyc32E	0.898367	-2.2237	1.29309	0.08549	NA
FBgn0010198	RpS15Aa	14.9266	0.109234	0.0761787	0.151595	0.506202
FBgn0010213	Sod2	10.8429	0.107068	0.0777518	0.168495	0.527489
FBgn0010215	alpha-Cat	12.3022	0.0387922	0.0691607	0.574866	0.834498
FBgn0010217	ATPsynbeta	14.3179	0.213289	0.0774905	0.00591506	0.0909699
FBgn0010220	Dbp45A	9.24626	0.196904	0.0958955	0.0400423	0.26812
FBgn0010222	Nmdmc	9.6467	-0.199891	0.112894	0.0766274	0.371407
FBgn0010223	Galphaf	2.04414	-0.358904	0.77854	0.644801	0.866106
FBgn0010225	Gel	10.7691	-0.209485	0.121326	0.0842335	0.38753
FBgn0010226	GstS1	13.3783	0.0224045	0.0394057	0.569654	0.829732
FBgn0010228	HmgZ	13.0112	0.0650332	0.0805758	0.419606	0.751848
FBgn0010235	Klc	11.1056	0.118432	0.0726617	0.103122	0.423906
FBgn0010238	Lac	12.8839	0.14801	0.0708819	0.0367874	0.257167
FBgn0010240	Lcch3	4.4946	-0.401455	0.381585	0.292766	0.665184
FBgn0010241	Mdr50	1.38948	-0.670189	1.60377	0.676032	0.880254
FBgn0010246	Myo61F	10.5332	-0.0797446	0.101247	0.430918	0.759333
FBgn0010247	Parp	11.1839	-0.122977	0.100242	0.219897	0.58607
FBgn0010258	Rbp4	4.54813	0.277743	0.319107	0.384094	0.730007
FBgn0010263	Rbp9	3.97243	-0.466516	0.478145	0.329223	0.691978
FBgn0010265	RpS13	15.5104	0.0591124	0.0732926	0.41994	0.751848
FBgn0010269	Dsor1	10.0724	0.0918466	0.0585845	0.116937	0.452901
FBgn0010278	Ssrp	12.3413	0.12138	0.0747707	0.104512	0.426185
FBgn0010280	Taf4	12.1562	-0.123122	0.0905432	0.173887	0.535185
FBgn0010282	TfIIFalpha	10.9806	0.0369028	0.0613243	0.547331	0.817873
FBgn0010287	Trf	8.59308	0.0210216	0.0979189	0.830014	0.949358
FBgn0010288	Uch	11.2726	0.0921767	0.0873998	0.291583	0.665066
FBgn0010292	bys	10.3627	0.0753802	0.0730824	0.302334	0.671787
FBgn0010300	brat	12.9118	-0.00883128	0.107119	0.934294	0.980692
FBgn0010303	hep	10.8738	-0.0247879	0.103909	0.811451	0.939999
FBgn0010309	pigeon	8.94175	-0.205563	0.0997365	0.0392973	0.265442
FBgn0010313	corto	11.536	0.00566823	0.0669113	0.93249	0.979742
FBgn0010314	Cks30A	10.9219	0.000871798	0.134477	0.994827	0.998349
FBgn0010315	CycD	10.5544	-0.0868771	0.0607459	0.152667	0.506618
FBgn0010316	dap	11.0188	0.108019	0.139128	0.437513	0.762284
FBgn0010323	Gsc	-0.8637	1.36209	2.44093	0.576831	NA
FBgn0010328	woc	13.1479	-0.0321569	0.117925	0.785092	0.927862
FBgn0010329	Tbh	-0.318264	1.67903	2.02013	0.405891	NA
FBgn0010333	Rac1	11.5895	0.0617204	0.0551034	0.262678	0.633948
FBgn0010339	128up	10.9062	0.0962139	0.0817819	0.239407	0.608185
FBgn0010340	140up	8.13551	0.182282	0.11753	0.120916	0.459254
FBgn0010341	Cdc42	12.5191	-0.000418831	0.0520777	0.993583	0.998323
FBgn0010342	Map60	12.1064	0.0673026	0.0435683	0.122404	0.462273
FBgn0010348	Arf79F	13.8815	0.131022	0.0657994	0.0464558	0.287825
FBgn0010350	Cds	9.56717	-0.0437492	0.0906271	0.629281	0.860581
FBgn0010352	Nc73EF	11.4398	-0.000617081	0.0665042	0.992597	0.997706
FBgn0010355	Taf1	11.7293	-0.163314	0.105218	0.120627	0.458876
FBgn0010356	Taf5	9.88256	0.0617758	0.0613101	0.313648	0.681682
FBgn0010357	betaTry	2.74129	0	3.51933	NA	NA
FBgn0010379	Akt1	11.7165	0.0651806	0.0690278	0.345034	0.703944
FBgn0010380	AP-1-2beta	11.7222	0.0721901	0.0888124	0.416311	0.751509
FBgn0010382	CycE	10.6493	-0.0122676	0.0931846	0.895263	0.969259
FBgn0010383	Cyp18a1	4.98563	0.429473	0.659092	0.51465	0.799233
FBgn0010385	Def	3.79334	0.580524	0.481613	0.228059	0.594315
FBgn0010387	Acbp2	1.96765	-2.16947	1.58629	0.171426	0.53212
FBgn0010388	Dro	0.926131	0.497275	1.14304	0.663528	NA
FBgn0010389	htl	9.2657	-0.150393	0.0900363	0.0948487	0.407612
FBgn0010391	SrpRalpha	11.7019	0.0481116	0.0886414	0.58729	0.841399
FBgn0010395	Itgbn	3.00588	-0.709153	0.719444	0.324282	0.688179
FBgn0010397	LamC	10.0492	-0.268094	0.193856	0.166679	0.52553
FBgn0010398	Lrr47	8.03969	0.0383869	0.0887488	0.665353	0.875782
FBgn0010399	Nmdar1	0.489873	2.06452	1.51313	0.172441	NA
FBgn0010401	Os-C	5.72291	0.39715	0.240146	0.0981712	0.414439
FBgn0010406	RNaseX25	9.64281	0.0393593	0.0738474	0.594046	0.843736
FBgn0010407	Ror	3.91956	-0.575278	0.363914	0.113922	0.446344
FBgn0010408	RpS9	15.2194	-0.105455	0.0887865	0.234939	0.603755
FBgn0010409	RpL18A	15.2094	0.101232	0.0748983	0.176506	0.538466
FBgn0010411	RpS18	14.9133	0.00886157	0.0795279	0.911278	0.975443
FBgn0010412	RpS19a	15.2396	-0.0578564	0.0802017	0.470672	0.779279
FBgn0010414	SerT	6.55573	-0.851079	0.181341	2.68889e-06	0.000206767
FBgn0010415	Sdc	12.807	0.0459472	0.0717883	0.522148	0.803749
FBgn0010416	TH1	10.8253	-0.0520873	0.048718	0.284998	0.657149
FBgn0010417	Taf6	10.2984	-0.0465505	0.0817099	0.568878	0.82915
FBgn0010421	TfIIFbeta	9.76323	0.064557	0.0642016	0.314639	0.682916
FBgn0010422	TfIIS	11.2539	0.0833708	0.0590527	0.158008	0.51393
FBgn0010423	TpnC47D	0.78772	-1.04768	1.6225	0.518462	NA
FBgn0010424	TpnC73F	4.7149	-1.75475	0.541163	0.00118466	0.0309221
FBgn0010425	epsilonTry	0.655404	-0.679478	2.61811	0.795226	NA
FBgn0010431	mtrm	1.75231	0.202448	0.873254	0.816669	0.943057
FBgn0010433	ato	4.17367	0.869257	0.431241	0.0438305	0.280233
FBgn0010434	cora	13.2863	0.00198624	0.0955173	0.98341	0.995166
FBgn0010435	emp	11.8732	-0.0979708	0.0618303	0.113078	0.444815
FBgn0010438	mtSSB	9.64891	-0.00745158	0.0941034	0.936885	0.981674
FBgn0010441	pll	9.60801	0.0481708	0.060928	0.429167	0.758229
FBgn0010452	trn	11.7359	0.0544262	0.065855	0.408546	0.74715
FBgn0010453	Wnt4	8.00603	0.200278	0.262589	0.445639	0.766054
FBgn0010470	Fkbp14	11.8504	0.389372	0.333093	0.24242	0.610908
FBgn0010473	tutl	11.585	-0.0662273	0.106831	0.535309	0.809769
FBgn0010482	l(2)01289	4.08688	1.57281	0.604804	0.00930791	0.116959
FBgn0010488	NAT1	13.6474	0.0279531	0.122094	0.818909	0.944072
FBgn0010497	dmGlut	8.48326	0.420479	0.106911	8.39026e-05	0.00385276
FBgn0010501	Dcp-1	10.6955	0.085741	0.0629549	0.173216	0.535185
FBgn0010504	kermit	9.00333	-0.21547	0.10568	0.0414607	0.273791
FBgn0010516	wal	10.8009	-0.0549284	0.0784015	0.48355	0.785171
FBgn0010520	Bka	8.61121	0.166567	0.0954044	0.0808281	0.377965
FBgn0010531	Ccs	8.38829	0.132835	0.11217	0.236323	0.605486
FBgn0010548	Aldh-III	11.3987	-0.16549	0.113077	0.143326	0.496617
FBgn0010549	l(2)03659	7.75638	0.263137	0.214982	0.220954	0.587009
FBgn0010551	Phb2	12.488	0.0477767	0.0463289	0.302423	0.671787
FBgn0010583	dock	10.3945	-0.0720558	0.0752468	0.338268	0.699035
FBgn0010590	Prosbeta1	11.7272	0.053542	0.0770042	0.48686	0.786459
FBgn0010591	Sply	10.0409	0.143988	0.0589273	0.0145457	0.15057
FBgn0010602	lwr	12.8568	0.0780145	0.0626559	0.213085	0.577161
FBgn0010607	l(2)05714	9.31802	0.185152	0.0855658	0.0304758	0.230622
FBgn0010611	Hmgs	10.0812	-0.0894964	0.0512112	0.0805342	0.377616
FBgn0010612	ATPsynG	11.549	0.208162	0.140685	0.13897	0.49175
FBgn0010620	CG10939	12.7731	-0.0140014	0.123654	0.909848	0.974741
FBgn0010621	CCT5	13.2744	0.0808369	0.0581627	0.164577	0.522464
FBgn0010622	DCTN3-p24	9.53919	-0.267401	0.0883113	0.00246231	0.0510535
FBgn0010638	Sec61beta	12.48	0.0901124	0.13021	0.488902	0.787073
FBgn0010651	MFS14	9.83942	0.52532	0.125335	2.77328e-05	0.0015532
FBgn0010660	Nup214	11.904	-0.0723481	0.0941986	0.442465	0.765158
FBgn0010741	Pfdn2	11.3463	0.166841	0.0764981	0.0291844	0.225492
FBgn0010747	Srp54k	11.4325	0.148006	0.0928739	0.11102	0.441212
FBgn0010750	atms	10.7661	0.0930671	0.0506462	0.0661224	0.343041
FBgn0010762	simj	11.663	-0.0469804	0.0909385	0.605423	0.849143
FBgn0010768	sqz	9.86217	0.0660028	0.0944445	0.484644	0.785348
FBgn0010770	ppan	9.60427	0.0485401	0.0699638	0.487815	0.786822
FBgn0010772	Xe7	11.9038	-0.0262288	0.0462324	0.570493	0.830579
FBgn0010774	Ref1	12.7663	0.180423	0.0486228	0.000206707	0.00804331
FBgn0010786	l(3)02640	9.62161	-0.0535898	0.0662712	0.418721	0.751509
FBgn0010803	TrpRS	9.97797	0.107157	0.0714664	0.133767	0.483225
FBgn0010808	Chchd3	10.245	0.0922868	0.0637764	0.147886	0.500654
FBgn0010812	unc-45	10.1951	0.0169199	0.0927398	0.855234	0.956082
FBgn0010825	Gug	12.3135	-0.0931378	0.134807	0.489629	0.787241
FBgn0010830	l(3)04053	9.80434	-0.0559726	0.0538983	0.299045	0.670792
FBgn0010877	l(3)05822	10.4277	-0.0424133	0.0722282	0.557061	0.822964
FBgn0010894	sinu	11.7104	0.0316639	0.0549192	0.564241	0.827195
FBgn0010905	Spn	9.68877	0.0177324	0.235406	0.939955	0.982734
FBgn0010909	msn	12.9138	0.0207577	0.10575	0.844383	0.952284
FBgn0010926	l(3)07882	10.251	0.0526491	0.069088	0.446025	0.766094
FBgn0011016	SsRbeta	12.081	0.252755	0.146704	0.0849088	0.388607
FBgn0011020	Sas-4	9.73874	-0.0364196	0.0904066	0.687064	0.885476
FBgn0011202	dia	10.5718	0.0222333	0.0869037	0.798075	0.933996
FBgn0011204	cue	9.86724	-0.114009	0.0706687	0.106681	0.431398
FBgn0011205	fbl	10.1354	0.00450206	0.0509477	0.929585	0.978565
FBgn0011206	bol	5.63731	-0.236835	0.320848	0.460421	0.773884
FBgn0011207	pelo	10.2214	-0.00231717	0.0499978	0.963035	0.989475
FBgn0011211	blw	14.2099	0.066324	0.0606566	0.274203	0.643438
FBgn0011217	eff	13.6006	0.0730907	0.0892207	0.412665	0.750146
FBgn0011224	heph	14.4575	-0.0882576	0.0880894	0.316387	0.683459
FBgn0011225	jar	12.8605	0.109178	0.183775	0.552456	0.821477
FBgn0011227	ox	9.13719	0.00336121	0.132741	0.979799	0.994476
FBgn0011230	poe	12.9302	-0.0789115	0.135673	0.560817	0.825361
FBgn0011232	scat	9.38484	0.0255996	0.0714796	0.72024	0.901371
FBgn0011236	ken	9.95607	-0.265477	0.316981	0.402302	0.742035
FBgn0011259	Sema1a	10.2693	-0.18474	0.157201	0.23992	0.608825
FBgn0011260	Sema2a	13.6016	-0.00348003	0.0574192	0.951672	0.98502
FBgn0011272	RpL13	15.2653	-0.000242624	0.0849299	0.997721	0.999189
FBgn0011274	Dif	6.84973	-1.36157	0.231967	4.36678e-09	5.95912e-07
FBgn0011279	Obp69a	2.52888	0.307272	0.663496	0.643285	0.866106
FBgn0011280	Obp19d	-0.77839	-2.66578	2.57699	0.300924	NA
FBgn0011282	Obp84a	2.97647	-0.0306544	0.610048	0.959924	0.988595
FBgn0011284	RpS4	15.7078	0.106833	0.0762373	0.161118	0.517598
FBgn0011286	RyR	4.7895	2.22229	0.491699	6.19482e-06	0.000419732
FBgn0011288	Snap25	6.10753	-1.43969	0.342674	2.65348e-05	0.00149474
FBgn0011289	TfIIA-L	10.8153	0.039334	0.0505564	0.436557	0.76214
FBgn0011290	Taf12	10.0963	0.122673	0.0566971	0.030491	0.230622
FBgn0011291	Taf11	9.08177	0.160393	0.114382	0.160837	0.517598
FBgn0011296	l(2)efl	3.94621	-1.43095	0.712058	0.0444743	0.281641
FBgn0011297	Alg3	9.21913	0.711166	0.114716	5.66879e-10	9.3093e-08
FBgn0011300	babo	11.711	-0.076804	0.0785661	0.328286	0.69161
FBgn0011305	Rsf1	12.0665	0.146681	0.0546171	0.00723941	0.101656
FBgn0011327	Uch-L5	11.509	0.107864	0.0553686	0.0514023	0.303267
FBgn0011335	vers	9.19603	0.0643407	0.0821095	0.433278	0.760099
FBgn0011336	Stt3B	12.2808	0.445807	0.23333	0.0560518	0.31465
FBgn0011361	ND-ACP	10.8085	0.129947	0.070486	0.0652438	0.340413
FBgn0011455	ND-SGDH	10.1664	-0.0303074	0.0868961	0.727257	0.903277
FBgn0011474	PR-Set7	10.9201	0.00593621	0.0901771	0.947514	0.984107
FBgn0011476	l(3)neo43	7.22004	-0.166412	0.16399	0.310216	0.678638
FBgn0011481	Ssdp	12.1985	-0.00876722	0.0824753	0.915343	0.976131
FBgn0011509	SrpRbeta	10.2181	0.203023	0.109918	0.0647424	0.339075
FBgn0011566	Smyd3	8.68759	-0.184982	0.0794561	0.0199066	0.181274
FBgn0011569	can	-0.955764	1.79057	2.95562	0.544635	NA
FBgn0011570	cpb	11.7242	0.124611	0.0723848	0.0851576	0.38926
FBgn0011573	Cdc37	11.3295	0.186052	0.0808688	0.021411	0.189108
FBgn0011576	Cyp4d2	7.32689	-0.862077	0.258627	0.000858295	0.0244589
FBgn0011584	Trp1	11.2367	0.0798119	0.0564069	0.157089	0.512116
FBgn0011586	e(r)	10.7196	0.091766	0.0448991	0.0409706	0.27208
FBgn0011589	Elk	3.89368	0.136962	0.589076	0.816147	0.942918
FBgn0011591	fng	12.0903	0.115906	0.0467216	0.0131094	0.141602
FBgn0011592	fra	11.9592	0.00967027	0.199743	0.961387	0.98926
FBgn0011596	fzo	0.0520325	-1.39504	1.96056	0.476743	NA
FBgn0011603	ine	3.47536	0.597803	0.489645	0.222127	0.587924
FBgn0011604	Iswi	12.386	-0.0563617	0.0536818	0.293754	0.665808
FBgn0011606	Klp3A	11.564	-0.0248567	0.0513054	0.628042	0.860084
FBgn0011638	La	12.378	0.242367	0.072452	0.000822219	0.0238779
FBgn0011640	lark	12.5869	0.0511217	0.0742501	0.491134	0.787241
FBgn0011642	Zyx	11.615	0.0653021	0.0568692	0.250851	0.622564
FBgn0011648	Mad	11.2425	-0.0854032	0.0511393	0.0949174	0.407612
FBgn0011653	mas	11.2317	0.0979545	0.103172	0.342401	0.70227
FBgn0011655	Med	10.8602	-0.0542204	0.0763118	0.477387	0.782413
FBgn0011656	Mef2	10.6502	-0.163949	0.0840076	0.0509855	0.301955
FBgn0011659	Mlh1	8.71616	-0.36873	0.16092	0.0219411	0.191004
FBgn0011660	Pms2	9.66904	-0.00231915	0.0802987	0.976959	0.993622
FBgn0011661	Moe	14.2217	-0.0916289	0.059551	0.123886	0.464328
FBgn0011666	msi	11.6123	-0.0751835	0.0846193	0.374276	0.723782
FBgn0011672	Mvl	10.4285	0.11277	0.142256	0.427937	0.756897
FBgn0011674	insc	7.01997	-0.377124	0.166285	0.0233332	0.197921
FBgn0011676	Nos	3.2705	-1.38336	1.05116	0.188165	0.548996
FBgn0011692	pav	11.8475	-0.00366349	0.0852226	0.965712	0.990499
FBgn0011693	Pdh	1.77667	0.0566039	0.732445	0.9384	0.982193
FBgn0011695	EbpIII	5.26086	-0.0958	0.488801	0.844618	0.952284
FBgn0011701	repo	1.56963	1.83405	0.91595	0.0452477	0.284309
FBgn0011703	RnrL	11.9312	0.0609279	0.0968764	0.529399	0.807502
FBgn0011704	RnrS	11.6955	0.12634	0.102869	0.219387	0.58607
FBgn0011705	rost	8.81237	0.096479	0.0689175	0.161537	0.518004
FBgn0011706	rpr	7.85953	0.436177	0.148328	0.00327558	0.0612685
FBgn0011708	Syx5	10.0093	-0.0233692	0.0541588	0.666109	0.875821
FBgn0011710	2024-09-01	12.1376	0.00748126	0.0555735	0.892913	0.968704
FBgn0011715	Snr1	11.0293	0.135235	0.0757503	0.0742169	0.363631
FBgn0011722	Tig	8.9795	-0.578908	0.371971	0.119631	0.457781
FBgn0011725	twin	11.3679	-0.0561644	0.0597722	0.347402	0.70542
FBgn0011726	tsr	14.1916	0.126042	0.0805832	0.117788	0.454317
FBgn0011737	Wee1	9.91347	-0.1031	0.0707825	0.145232	0.498411
FBgn0011739	wts	10.7389	-0.0133453	0.103096	0.897005	0.969717
FBgn0011740	alpha-Man-IIa	11.2907	-0.0214059	0.067108	0.749745	0.914129
FBgn0011741	Arp6	10.5975	0.109767	0.0579273	0.0581038	0.319789
FBgn0011742	Arp2	11.8422	0.0649303	0.0601271	0.280194	0.650904
FBgn0011745	Arp1	11.339	0.12626	0.0587598	0.0316547	0.235744
FBgn0011746	ana	10.8735	0.190301	0.107381	0.07636	0.370296
FBgn0011747	Ank	12.979	0.15178	0.0507962	0.00280787	0.0547394
FBgn0011754	PhKgamma	10.8526	-0.0909369	0.059529	0.12661	0.470277
FBgn0011758	B-H1	7.64111	-0.0980284	0.140767	0.486186	0.786253
FBgn0011760	ctp	13.3888	-0.0699143	0.0546325	0.200644	0.563025
FBgn0011762	DNApol-alpha50	8.16364	0.233682	0.125455	0.0625071	0.332399
FBgn0011763	Dp	12.2558	0.0356671	0.062305	0.567011	0.828747
FBgn0011766	E2f1	12.3237	-0.158639	0.0919656	0.0845315	0.387796
FBgn0011768	Fdh	12.0312	0.00456751	0.0633919	0.942561	0.983466
FBgn0011769	Fdx1	7.44681	0.0586257	0.127754	0.64631	0.866127
FBgn0011770	Gip	9.65629	-0.440194	0.132841	0.00092074	0.0260089
FBgn0011771	Hem	10.8961	0.0615166	0.0693998	0.375398	0.724403
FBgn0011774	Irbp	8.61297	-0.238152	0.12116	0.0493458	0.297288
FBgn0011785	BRWD3	11.9534	-0.0705986	0.109837	0.520381	0.803374
FBgn0011787	mRpL12	10.1556	0.0610044	0.0902985	0.499304	0.791138
FBgn0011802	Gem3	9.32733	0.121196	0.0820644	0.13972	0.492177
FBgn0011817	nmo	11.7825	0.123455	0.154198	0.423348	0.753394
FBgn0011818	oaf	9.8369	0.054788	0.0745256	0.462244	0.774858
FBgn0011824	CG4038	11.4317	0.12486	0.0905816	0.168072	0.527178
FBgn0011826	Pp2B-14D	10.9794	0.051271	0.0726976	0.480646	0.783525
FBgn0011828	Pxn	11.0792	0.184776	0.294289	0.530087	0.807502
FBgn0011829	Ret	5.80761	0.909401	0.27358	0.000887136	0.0251329
FBgn0011836	Taf2	10.6652	-0.178999	0.0735219	0.0149068	0.153723
FBgn0011837	Tis11	11.4452	-0.381771	0.186977	0.0411706	0.272834
FBgn0011916	tRNA:Met-CAT-1-2	0.162853	-1.40482	1.7973	0.434435	NA
FBgn0011987	tRNA:SeC-TCA-1-1	-1.16966	-0.756457	3.57304	0.832331	NA
FBgn0012034	AcCoAS	6.79112	-0.77718	0.338808	0.0217983	0.190549
FBgn0012036	Aldh	10.3079	-1.29134	0.309028	2.9318e-05	0.00162321
FBgn0012037	Ance	13.4383	-0.0086978	0.0789067	0.912228	0.975773
FBgn0012042	AttA	0.112478	2.16536	1.85441	0.242934	NA
FBgn0012051	CalpA	10.2967	-0.0685293	0.0716251	0.338679	0.699374
FBgn0012058	Cdc27	10.5078	0.0435918	0.0644666	0.498919	0.791036
FBgn0013263	Trl	8.49545	0.0875297	0.0957289	0.360533	0.712512
FBgn0013269	Fkbp39	13.0323	0.149663	0.101804	0.141532	0.494956
FBgn0013272	Gp150	14.455	0.0138863	0.0434278	0.749154	0.914129
FBgn0013275	Hsp70Aa	5.55094	-0.729577	0.741804	0.325353	0.689338
FBgn0013276	Hsp70Ab	7.1959	-1.02665	0.765993	0.180153	0.543093
FBgn0013277	Hsp70Ba	6.2009	-2.57885	1.3286	0.0522558	0.305682
FBgn0013278	Hsp70Bb	8.5902	-2.13261	0.989062	0.0310685	0.233532
FBgn0013279	Hsp70Bc	8.66504	-1.66247	1.00288	0.0973791	0.412754
FBgn0013303	Nca	10.1601	0.0506515	0.0766549	0.508758	0.795744
FBgn0013305	Nmda1	10.5968	0.12852	0.0524214	0.0142195	0.148622
FBgn0013307	Odc1	2.75583	-1.79499	1.51894	0.237308	0.606509
FBgn0013308	Odc2	-0.151274	-3.26536	3.33727	0.327851	NA
FBgn0013323	Ptth	-0.317246	-0.348655	1.9412	0.85746	NA
FBgn0013325	RpL11	15.1188	0.0695025	0.0694311	0.316813	0.683958
FBgn0013334	Sap47	10.5451	-0.0710123	0.087416	0.416592	0.751509
FBgn0013342	nSyb	1.54459	-2.85395	1.39617	0.0409407	0.272068
FBgn0013343	Syx1A	9.81153	-0.195053	0.210802	0.354816	0.709558
FBgn0013347	TfIIA-S	10.8518	-0.0283762	0.062588	0.650275	0.8676
FBgn0013432	bcn92	8.86432	0.0224128	0.0907266	0.80488	0.93743
FBgn0013435	Cdc2rk	9.02955	0.176008	0.0672576	0.00887242	0.114467
FBgn0013467	igl	0.066156	-0.343192	1.8748	0.854755	NA
FBgn0013469	klu	10.477	-0.0152056	0.108281	0.888323	0.967299
FBgn0013531	MED20	8.31067	0.074924	0.112445	0.505207	0.794488
FBgn0013548	l(2)dtl	9.51031	0.0101769	0.0960993	0.915661	0.976131
FBgn0013563	Pex1	8.26075	-0.11734	0.107226	0.273813	0.643414
FBgn0013576	mtd	11.9057	-0.132482	0.0665342	0.0464607	0.287825
FBgn0013672	NA	14.1781	0.0550958	0.119645	0.64516	0.866106
FBgn0013673	NA	1.17602	0.291833	0.913205	0.749294	NA
FBgn0013674	NA	16.6086	0.0108197	0.075787	0.886476	0.966397
FBgn0013675	NA	14.8349	0.0608138	0.104127	0.559196	0.824354
FBgn0013676	NA	16.2014	0.0194342	0.0808324	0.81	0.939381
FBgn0013678	NA	15.2257	0.0456666	0.117409	0.69731	0.890292
FBgn0013679	NA	13.9741	0.105799	0.164408	0.519892	0.802746
FBgn0013680	NA	6.83144	-0.232667	0.167057	0.163697	0.520998
FBgn0013681	NA	12.9173	0.0644363	0.182452	0.723962	0.902298
FBgn0013683	NA	2.3769	0.145153	0.700763	0.835904	0.950589
FBgn0013684	NA	13.2009	0.162254	0.329279	0.622186	0.856243
FBgn0013685	NA	3.78743	1.12555	0.814706	0.167113	0.52596
FBgn0013686	NA	19.2741	-0.137132	0.0942096	0.145502	0.498411
FBgn0013688	NA	7.50968	-0.0503559	0.2925	0.863314	0.958974
FBgn0013689	NA	2.26018	-0.66386	0.7798	0.394591	0.737161
FBgn0013690	NA	-0.547042	-0.558618	2.32508	0.810131	NA
FBgn0013694	NA	1.14529	1.83575	0.925028	0.0471963	NA
FBgn0013698	NA	0.398463	-0.786291	1.65727	0.63518	NA
FBgn0013699	NA	2.7581	0.389287	0.700453	0.578372	0.836644
FBgn0013704	NA	0.133515	0.530287	1.23755	0.668289	NA
FBgn0013710	NA	4.62219	-1.99286	0.781966	0.0108181	0.127051
FBgn0013717	not	10.6314	0.0557242	0.10853	0.607639	0.850782
FBgn0013718	nuf	11.6839	-0.0768266	0.0620109	0.215375	0.580682
FBgn0013720	pck	11.911	0.0852382	0.0661727	0.197705	0.560927
FBgn0013725	phyl	6.15307	0.0917985	0.212712	0.66606	0.875821
FBgn0013726	pnut	12.5489	0.0356554	0.0409833	0.384302	0.730007
FBgn0013732	sced	9.48002	0.0178954	0.0608397	0.768651	0.922297
FBgn0013733	shot	13.0638	-0.103442	0.1576	0.511595	0.797786
FBgn0013746	alien	11.0512	0.0660194	0.0584824	0.25895	0.631278
FBgn0013749	Arf102F	11.1456	0.352425	0.105294	0.000816718	0.0238349
FBgn0013750	Arf51F	10.9878	0.142478	0.0762959	0.0618405	0.331584
FBgn0013751	Awh	6.41867	0.000815247	0.169641	0.996166	0.999189
FBgn0013753	Bgb	10.4667	0.0937955	0.0585823	0.109357	0.438018
FBgn0013756	Mtor	12.905	-0.0262227	0.0943501	0.781067	0.926626
FBgn0013759	CASK	10.5742	-0.110466	0.0997908	0.268303	0.639054
FBgn0013762	Cdk5	8.99962	0.102586	0.0701736	0.14377	0.496786
FBgn0013763	Idgf6	10.1876	0.317734	0.284932	0.264797	0.636472
FBgn0013764	Chi	10.9371	0.0904893	0.042101	0.0316076	0.235574
FBgn0013765	cnn	10.6974	-0.114576	0.114579	0.317322	0.683972
FBgn0013770	Cp1	12.0145	0.00230711	0.0615969	0.970122	0.992077
FBgn0013771	Cyp6a9	1.43854	-0.955551	1.47704	0.517672	0.801098
FBgn0013772	Cyp6a8	1.81569	-1.42491	1.8829	0.449191	0.766927
FBgn0013773	Cyp6a22	1.00755	-2.86804	1.66169	0.0843519	NA
FBgn0013799	Deaf1	10.4272	-0.0530894	0.0869176	0.541331	0.81292
FBgn0013810	Dhc36C	3.85923	-1.25839	0.618166	0.0417828	0.274525
FBgn0013811	Dhc62B	5.74924	-0.271466	0.240645	0.259288	0.631278
FBgn0013812	Dhc93AB	6.44032	0.174445	0.244091	0.474811	0.781403
FBgn0013813	Dhc98D	1.1734	-1.70828	1.66098	0.303727	NA
FBgn0013949	Elal	3.47538	-1.87384	0.975657	0.0547829	0.311461
FBgn0013953	Esp	4.07088	-0.0517191	0.386267	0.893486	0.968704
FBgn0013954	Fkbp12	13.5025	0.135328	0.080112	0.0911753	0.399387
FBgn0013972	Gycalpha99B	0.197572	-1.62674	1.79361	0.364427	NA
FBgn0013973	Gycbeta100B	0.547795	1.72246	1.30164	0.185737	NA
FBgn0013981	His4r	14.0048	0.0112496	0.0728909	0.877346	0.964078
FBgn0013983	imd	8.49898	0.0727564	0.0795141	0.360185	0.712512
FBgn0013987	MAPk-Ak2	11.7089	0.0544351	0.0404728	0.178632	0.540998
FBgn0013995	Calx	1.57516	-0.442223	1.24823	0.723129	0.902298
FBgn0013997	Nrx-IV	13.0937	-0.0225312	0.0816172	0.782502	0.92667
FBgn0014000	Hf	3.08793	-1.8461	0.86303	0.032428	0.237308
FBgn0014006	Ask1	11.0418	-0.0878355	0.0675663	0.193605	0.554817
FBgn0014007	Ptp69D	10.9976	-0.0770933	0.0732379	0.292505	0.665184
FBgn0014009	Rab2	10.7547	-0.0141349	0.0537562	0.792593	0.932422
FBgn0014010	Rab5	11.899	0.20175	0.0717003	0.00489596	0.0794589
FBgn0014011	Rac2	10.9072	0.0303028	0.0693785	0.662274	0.873982
FBgn0014018	Rel	10.2662	-0.116267	0.0626479	0.0634713	0.335501
FBgn0014019	Rh5	3.51972	-0.80684	0.424778	0.0575071	0.318574
FBgn0014020	Rho1	13.3086	0.0869798	0.0459034	0.0581133	0.319789
FBgn0014022	Rlb1	8.61636	0.186065	0.106801	0.0814796	0.379672
FBgn0014023	mRpL47	9.48703	0.0492819	0.0918995	0.591779	0.842981
FBgn0014024	Rnp4F	11.058	0.0313545	0.0721561	0.663898	0.874784
FBgn0014026	RpL7A	15.9734	0.0359227	0.0594385	0.5456	0.816116
FBgn0014028	SdhB	10.9882	0.0134559	0.0536775	0.802061	0.936286
FBgn0014029	2024-09-02	11.4475	0.0560546	0.0413388	0.175106	0.536838
FBgn0014031	Spat	3.704	-4.60915	1.34923	NA	NA
FBgn0014032	Sptr	9.31525	-0.0997189	0.112708	0.37629	0.724978
FBgn0014033	Sr-CI	8.33728	-0.267129	0.41724	0.522024	0.803749
FBgn0014037	Su(Tpl)	11.7579	-0.130092	0.1054	0.217102	0.583249
FBgn0014073	Tie	7.31554	-0.961558	0.245764	9.13359e-05	0.00411606
FBgn0014075	Uggt	11.8788	0.114412	0.0875238	0.191141	0.553156
FBgn0014076	Vm32E	2.25617	0.0153036	0.885577	0.986212	0.996082
FBgn0014092	CG4278	9.68402	0.260218	0.0855958	0.00236521	0.0494958
FBgn0014127	barr	11.4527	0.0158882	0.068011	0.815286	0.942301
FBgn0014133	bif	12.6644	0.0980193	0.0930766	0.292293	0.665184
FBgn0014135	bnl	7.04596	-0.373215	0.166989	0.0254198	0.208369
FBgn0014141	cher	12.5986	-0.348329	0.128657	0.00678074	0.0990782
FBgn0014163	fax	15.1985	0.103892	0.081267	0.201109	0.563528
FBgn0014179	gcm	0.860705	-0.728367	0.938718	0.437798	NA
FBgn0014184	Oda	13.2661	-0.0292248	0.0659226	0.657534	0.871406
FBgn0014189	Hel25E	13.3179	0.0707565	0.0517043	0.171161	0.532043
FBgn0014269	prod	10.3194	-0.0308677	0.0604405	0.609552	0.851336
FBgn0014340	mof	9.32695	-0.0264623	0.0799502	0.740656	0.909878
FBgn0014342	mia	8.36093	-0.207136	0.142586	0.146307	0.499073
FBgn0014343	mirr	11.698	0.0530675	0.0797543	0.505802	0.794539
FBgn0014366	noi	10.7444	0.0819762	0.057328	0.152731	0.506618
FBgn0014368	nol	1.03178	2.33942	1.64258	0.154377	NA
FBgn0014380	RhoL	8.21474	0.248296	0.132126	0.0602128	0.325377
FBgn0014388	sty	10.8291	0.105117	0.0860011	0.221606	0.587452
FBgn0014391	sun	11.2857	-0.0164709	0.132265	0.900896	0.970907
FBgn0014395	tilB	2.14823	-0.851128	0.688614	0.216458	0.58205
FBgn0014396	tim	0.94249	-0.425926	1.21469	0.725853	NA
FBgn0014411	Vps26	10.9003	0.0889189	0.0629526	0.157811	0.513614
FBgn0014417	CG13397	6.3295	-0.0316561	0.184035	0.863429	0.958974
FBgn0014427	CG11899	11.5214	0.247671	0.111728	0.0266414	0.214214
FBgn0014455	Ahcy	11.9945	-0.00615288	0.0600426	0.918379	0.976131
FBgn0014464	Cp7Fa	0.922861	-0.390971	1.32879	0.768581	NA
FBgn0014469	Cyp4e2	9.88554	0.0220551	0.130763	0.86606	0.959586
FBgn0014857	His3.3A	12.1547	0.131222	0.0780525	0.0927242	0.402298
FBgn0014859	Hr38	2.54669	-2.69173	1.01441	0.00796638	0.107802
FBgn0014861	Mcm2	11.3649	-0.00655458	0.0976362	0.946476	0.983738
FBgn0014863	Mlp84B	3.88983	-0.764613	0.457853	0.0949198	0.407612
FBgn0014868	Ost48	12.6215	0.0515393	0.0673721	0.444275	0.765672
FBgn0014869	Pglym78	10.6074	0.112365	0.0963966	0.243756	0.612965
FBgn0014870	Psi	12.4639	-0.038119	0.0835653	0.648276	0.866604
FBgn0014877	Roe1	9.34835	0.00857152	0.0817155	0.916459	0.976131
FBgn0014879	Set	12.4409	0.195229	0.0722462	0.00688676	0.0996745
FBgn0014903	CG14630	0.965277	-1.60801	1.69604	0.34308	NA
FBgn0014906	Hydr2	9.80222	0.089765	0.0860775	0.297023	0.668802
FBgn0014930	CG2846	8.69161	-0.105786	0.093189	0.256301	0.62923
FBgn0014931	CG2678	4.17003	-0.100044	0.29954	0.738386	0.90905
FBgn0014949	btn	1.92722	-0.489278	0.728156	0.501621	0.792339
FBgn0015000	betaggt-I	9.54196	0.0291243	0.0615973	0.636343	0.862794
FBgn0015008	Actn3	-0.285859	-0.300795	1.96067	0.878072	NA
FBgn0015010	Ag5r	3.6021	-0.313829	0.737387	0.670403	0.877656
FBgn0015011	AhcyL2	5.26689	-0.368373	0.340241	0.278949	0.649924
FBgn0015019	CCT3	13.104	0.0887743	0.0616166	0.149654	0.504057
FBgn0015024	CkIalpha	12.9323	0.0726554	0.0530864	0.171116	0.532043
FBgn0015025	CkIIalpha-i1	7.06931	-0.193748	0.149284	0.19434	0.555495
FBgn0015031	cype	10.9574	0.219338	0.121755	0.0716285	0.35741
FBgn0015032	Cyp4c3	2.46169	-12.7034	5.06806	NA	NA
FBgn0015033	Cyp4d8	2.50277	-2.18358	0.864356	0.0115287	0.132035
FBgn0015034	Cyp4e1	3.28983	0.0899058	0.446094	0.840276	0.950893
FBgn0015036	Cyp4ae1	4.24275	-0.233918	0.371757	0.529203	0.807502
FBgn0015037	Cyp4p1	1.57941	-2.62604	1.59302	0.0992571	0.416501
FBgn0015039	Cyp9b2	2.8366	-2.56718	1.49544	0.0860389	0.390879
FBgn0015040	Cyp9c1	9.62641	-0.307591	0.148456	0.0382718	0.26206
FBgn0015075	Ddx1	10.688	-0.0260035	0.0521834	0.618266	0.854797
FBgn0015218	eIF4E1	13.0481	0.0442595	0.039942	0.267821	0.639054
FBgn0015221	Fer2LCH	12.0902	-0.122456	0.0829202	0.139732	0.492177
FBgn0015222	Fer1HCH	12.2901	-0.155468	0.0931037	0.094951	0.407612
FBgn0015229	glec	10.2861	0.308308	0.127411	0.0155298	0.157739
FBgn0015239	Hr78	11.548	0.00609833	0.0920959	0.947205	0.984094
FBgn0015240	Hr96	8.6388	-0.0150965	0.0844417	0.85811	0.957395
FBgn0015245	Hsp60A	13.4156	0.0135777	0.0577622	0.81416	0.941544
FBgn0015247	Diap2	10.2136	-0.106932	0.0634504	0.0919349	0.400766
FBgn0015268	Nap1	13.5125	-0.0720437	0.0627074	0.250603	0.622269
FBgn0015269	Nf1	10.5266	-0.0498336	0.124337	0.688571	0.885785
FBgn0015270	Orc2	9.03826	-0.0277135	0.118583	0.815213	0.942301
FBgn0015271	Orc5	8.80584	-0.0524335	0.0936303	0.575476	0.834948
FBgn0015277	Pi3K59F	8.89955	-0.159827	0.072575	0.0276488	0.219222
FBgn0015278	Pi3K68D	10.9388	-0.0447467	0.0972586	0.645459	0.866106
FBgn0015279	Pi3K92E	11.0735	-0.0147536	0.077439	0.848902	0.953579
FBgn0015282	Rpt2	12.2377	0.157309	0.0672235	0.0192789	0.177246
FBgn0015283	Rpn10	11.7368	0.198571	0.0826587	0.0162924	0.162238
FBgn0015286	Rala	10.7907	0.0561548	0.0870875	0.519051	0.801576
FBgn0015288	RpL22	15.0044	-0.0797211	0.0987879	0.419671	0.751848
FBgn0015295	Shark	10.2549	-0.0643094	0.0497898	0.19649	0.559116
FBgn0015296	Shc	10.1583	0.00358006	0.056896	0.949828	0.984864
FBgn0015298	Srp19	9.75661	0.112749	0.0759269	0.137554	0.489446
FBgn0015299	Ssb-c31a	9.81745	0.414218	0.113567	0.000264958	0.00987376
FBgn0015316	Try29F	5.69025	0.0933217	0.202988	0.645703	0.866106
FBgn0015320	Ubc2	11.6967	0.0382661	0.0466176	0.411731	0.749439
FBgn0015321	Ubc4	10.771	0.131826	0.0712159	0.0641593	0.337664
FBgn0015331	abs	9.75413	-0.0459522	0.107521	0.669104	0.877022
FBgn0015336	CG15865	-0.623153	0.0718406	2.19109	0.973844	NA
FBgn0015338	CG5861	10.184	-0.0256446	0.0562878	0.648679	0.866611
FBgn0015351	CG14906	7.45714	-0.158679	0.134253	0.23723	0.60647
FBgn0015359	CG2034	9.7385	0.164853	0.0662205	0.0127939	0.139752
FBgn0015360	oxt	8.60308	0.16111	0.110607	0.145229	0.498411
FBgn0015371	chn	11.3141	-0.059282	0.121219	0.624807	0.857836
FBgn0015372	RabX1	8.55692	0.0374038	0.0818637	0.647741	0.866127
FBgn0015376	cutlet	9.05575	0.045648	0.114496	0.690124	0.886466
FBgn0015379	dod	10.6283	0.11075	0.0879683	0.20804	0.573093
FBgn0015380	drl	12.2584	-0.0473631	0.0687804	0.491067	0.787241
FBgn0015391	glu	11.5273	-0.0300819	0.0990682	0.761396	0.920087
FBgn0015396	jumu	11.9516	-0.128063	0.165728	0.439683	0.763868
FBgn0015399	kek1	12.0084	0.168507	0.0878493	0.0550941	0.311991
FBgn0015400	kek2	4.44906	0.150579	0.455112	0.740749	0.909878
FBgn0015402	ksr	10.0292	-0.0661475	0.0862267	0.443002	0.765515
FBgn0015477	Rme-8	11.4021	0.00301333	0.11784	0.979599	0.99446
FBgn0015509	Cul1	12.3135	-0.068316	0.0658176	0.299289	0.670792
FBgn0015513	mbc	11.0705	-0.0534696	0.106509	0.615654	0.854145
FBgn0015519	nAChRalpha3	1.22257	1.15584	1.12653	0.304885	NA
FBgn0015520	nonA-l	9.50486	0.0378453	0.102722	0.712556	0.896788
FBgn0015521	RpS21	14.2727	-0.201653	0.0995887	0.0428819	0.278335
FBgn0015522	olf186-M	5.53406	-0.0326536	0.219602	0.881795	0.964775
FBgn0015527	peng	11.2433	0.0172411	0.0603496	0.775118	0.924592
FBgn0015543	snoRNA:Me28S-A1322	6.95883	0.142203	0.20333	0.484319	0.785348
FBgn0015544	spag	9.11886	0.292881	0.080049	0.000253427	0.00959162
FBgn0015546	spel1	10.6237	-0.0657046	0.0873635	0.452002	0.768593
FBgn0015553	tos	7.96519	0.0390212	0.140353	0.780996	0.926626
FBgn0015558	tty	6.4344	-0.078521	0.21123	0.710092	0.895441
FBgn0015561	unpg	4.13186	-1.15962	0.543932	0.0330133	0.240501
FBgn0015568	alpha-Est1	3.31206	-1.88127	0.981165	0.0551887	0.312108
FBgn0015569	alpha-Est10	6.54315	-0.142244	0.303544	0.639347	0.864323
FBgn0015570	alpha-Est2	4.07277	-6.57706	2.19905	NA	NA
FBgn0015571	alpha-Est3	7.25393	-0.307908	0.134487	0.0220505	0.191589
FBgn0015572	alpha-Est4	5.83781	-0.338685	0.304549	0.2661	0.637822
FBgn0015574	alpha-Est6	-0.759126	0.717469	3.36978	0.831395	NA
FBgn0015575	alpha-Est7	4.95993	-2.19943	0.880145	0.0124566	0.137784
FBgn0015576	alpha-Est8	4.51626	-0.69674	0.606589	0.250713	0.622382
FBgn0015577	alpha-Est9	3.67044	-0.5695	0.564807	0.313306	0.681406
FBgn0015582	dare	8.77834	-0.117512	0.0711936	0.0988196	0.415437
FBgn0015586	Acp76A	-0.524195	1.07163	1.8429	0.560909	NA
FBgn0015589	Apc	10.4877	-0.0836396	0.122656	0.495299	0.78868
FBgn0015591	AstA	4.10016	-3.05305	0.764976	6.5786e-05	0.00317115
FBgn0015600	toc	10.4424	-0.108069	0.104817	0.302532	0.671787
FBgn0015602	BEAF-32	10.7333	0.106879	0.0508133	0.0354335	0.25223
FBgn0015609	CadN	9.6166	-0.255446	0.149603	0.0877299	0.393197
FBgn0015614	CanB2	10.6736	0.134371	0.0483913	0.00549037	0.0864978
FBgn0015615	SMC3	11.0876	-0.0277882	0.0736458	0.705934	0.893274
FBgn0015618	Cdk8	8.84616	0.0435761	0.0845727	0.606378	0.849626
FBgn0015621	Clp	8.97153	0.0283191	0.0855648	0.740669	0.909878
FBgn0015622	Cnx99A	12.1721	0.180081	0.0952765	0.058746	0.32049
FBgn0015623	Cpr	11.2115	0.00281707	0.0796396	0.971783	0.992152
FBgn0015625	CycB3	10.9618	0.0229504	0.0796793	0.77332	0.924063
FBgn0015663	Ugt36A1	7.47959	0.00206275	0.170747	0.990361	0.997567
FBgn0015664	Dref	11.5066	0.134046	0.0537367	0.0126139	0.138861
FBgn0015714	Cyp6a17	7.37956	-0.113394	0.21462	0.597259	0.845807
FBgn0015721	ktub	1.87127	0.712539	0.757543	0.346914	0.705319
FBgn0015737	Hmu	12.4821	0.170984	0.086239	0.0474039	0.289412
FBgn0015754	Lis-1	11.6215	0.00993992	0.0543133	0.85479	0.955818
FBgn0015756	RpL9	14.8907	0.0620651	0.0820132	0.449188	0.766927
FBgn0015765	p38a	8.84531	0.0351816	0.11417	0.757968	0.91831
FBgn0015766	Msr-110	13.8954	-0.0758664	0.0881004	0.389163	0.733412
FBgn0015772	Nak	10.4521	-0.037458	0.0949215	0.693122	0.888433
FBgn0015773	NetA	9.11248	0.10531	0.290773	0.717223	0.899507
FBgn0015774	NetB	10.2614	-0.156152	0.138398	0.259199	0.631278
FBgn0015776	nrv1	10.6499	-0.0909231	0.0731787	0.214059	0.578365
FBgn0015777	nrv2	11.9898	-0.0213882	0.0709187	0.762966	0.920277
FBgn0015778	rin	14.2966	0.0854173	0.0762731	0.262761	0.633948
FBgn0015781	P5cr	9.22442	0.238712	0.0748577	0.00142827	0.0345102
FBgn0015789	Rab10	10.744	-0.00935114	0.056567	0.868699	0.96088
FBgn0015790	Rab11	12.6908	0.152586	0.0644636	0.0179321	0.170549
FBgn0015791	Rab14	9.71682	-0.00551074	0.0556486	0.921116	0.976131
FBgn0015793	Rab19	8.49368	0.0193311	0.0993492	0.845724	0.952284
FBgn0015794	Rab18	9.16977	0.0573232	0.0999608	0.566336	0.828468
FBgn0015795	Rab7	11.3598	0.117476	0.0501263	0.0190988	0.176405
FBgn0015797	Rab6	10.9242	0.211312	0.138344	0.126652	0.470277
FBgn0015799	Rbf	11.4646	-0.0585499	0.0565658	0.300634	0.670852
FBgn0015801	Reg-5	9.65429	-0.0355401	0.143761	0.804741	0.937384
FBgn0015803	RtGEF	9.99702	0.179263	0.0818563	0.0285263	0.222897
FBgn0015805	HDAC1	12.652	0.148365	0.0491115	0.00251956	0.0513783
FBgn0015808	ScpX	10.5858	-0.119594	0.0660746	0.0702992	0.3531
FBgn0015818	Spx	10.4496	0.092255	0.078179	0.237981	0.607109
FBgn0015828	TfIIEalpha	9.50392	0.0510569	0.0929549	0.582824	0.8392
FBgn0015829	TfIIEbeta	9.17735	0.00832206	0.0825408	0.919691	0.976131
FBgn0015831	Rtnl2	2.31358	1.16601	0.795966	0.142947	0.496243
FBgn0015834	eIF3i	12.8249	0.163276	0.0577339	0.00468276	0.0768353
FBgn0015838	Vang	12.0051	0.00972921	0.0736537	0.89491	0.969236
FBgn0015872	Drip	10.1445	0.209474	0.123207	0.089096	0.394313
FBgn0015903	apt	8.66363	-0.282761	0.182762	0.121826	0.461084
FBgn0015904	ara	11.3442	0.0332841	0.0784993	0.671562	0.877988
FBgn0015905	ast	9.40239	-0.00784287	0.0724613	0.913809	0.976131
FBgn0015919	caup	11.7035	-0.0747116	0.0841104	0.374403	0.723782
FBgn0015924	crq	10.1002	0.105615	0.11407	0.354505	0.709405
FBgn0015925	csul	9.66582	-0.0723605	0.0658833	0.272068	0.642074
FBgn0015926	dah	9.75451	-0.161071	0.0897588	0.0727358	0.360044
FBgn0015929	dpa	11.4735	-0.0629129	0.0984206	0.522677	0.804099
FBgn0015949	hrg	12.2798	-0.0260333	0.0496749	0.600227	0.847039
FBgn0016013	Faa	4.89494	0.117561	0.388525	0.762209	0.920277
FBgn0016032	lbm	4.33882	-0.618702	0.40477	0.126382	0.469702
FBgn0016034	mael	5.52396	-0.510193	0.229808	0.0264129	0.213618
FBgn0016036	mei-P22	3.40201	0.39848	0.561156	0.477639	0.782413
FBgn0016038	Vsp37A	10.164	0.116796	0.0686593	0.0889248	0.394141
FBgn0016041	Tom40	11.0301	0.136492	0.0731765	0.0621464	0.331993
FBgn0016047	nompA	-0.197288	1.35349	1.78312	0.447819	NA
FBgn0016053	pgc	3.42917	0.0368387	0.502492	0.941558	0.983055
FBgn0016054	phr6-4	8.67174	-0.0901544	0.109678	0.41108	0.749109
FBgn0016059	Sema1b	12.7409	-0.0230672	0.0769427	0.764331	0.920358
FBgn0016061	side	6.61537	-0.396505	0.379783	0.296471	0.668181
FBgn0016070	smg	10.0774	0.107182	0.0950969	0.259707	0.631602
FBgn0016075	vkg	11.2866	-0.30482	0.303278	0.314857	0.683083
FBgn0016076	vri	10.2721	-0.261387	0.166862	0.117234	0.453085
FBgn0016078	wun	9.51825	-0.129446	0.136804	0.344038	0.702841
FBgn0016081	fry	11.1858	-0.13937	0.13468	0.300753	0.670882
FBgn0016119	ATPsynCF6	11.4176	0.089445	0.0789796	0.257421	0.630014
FBgn0016120	ATPsynD	11.9096	0.173951	0.0881191	0.0483768	0.292889
FBgn0016122	Acer	5.71245	-0.522915	0.239693	0.0291384	0.225492
FBgn0016126	CaMKI	11.9135	-0.0981088	0.0562757	0.0812707	0.378938
FBgn0016131	Cdk4	10.8947	0.121795	0.0436395	0.00525568	0.0838481
FBgn0016641	PTP-ER	9.89175	-0.0439821	0.115818	0.704129	0.892855
FBgn0016660	H15	3.18867	1.12556	0.791004	0.154751	0.511038
FBgn0016672	Ipp	9.2069	-0.0512756	0.0702459	0.465424	0.776791
FBgn0016684	NaPi-T	5.28625	0.374346	0.28335	0.186453	0.547513
FBgn0016685	Nlp	13.5025	0.180048	0.0914712	0.0490271	0.29565
FBgn0016687	Nurf-38	12.286	0.137091	0.0721289	0.0573494	0.318247
FBgn0016691	ATPsynO	12.1484	0.113683	0.0821537	0.166425	0.525241
FBgn0016693	Past1	11.2392	0.10853	0.134223	0.418757	0.751509
FBgn0016694	Pdp1	8.5252	-0.17112	0.160353	0.285905	0.658432
FBgn0016696	Pitslre	12.0872	-0.0614259	0.068392	0.369108	0.720595
FBgn0016697	Prosalpha5	11.5233	0.208183	0.0938989	0.0266162	0.214214
FBgn0016698	Ptpa	9.38315	0.0775202	0.0824626	0.347184	0.705362
FBgn0016701	Rab4	10.4246	-0.00717361	0.0531032	0.892542	0.968704
FBgn0016715	Reg-2	6.51229	-0.707805	0.437891	0.106008	0.42992
FBgn0016726	RpL29	14.5103	-0.0256697	0.123779	0.83571	0.950589
FBgn0016754	sba	10.0898	-0.0547374	0.136326	0.688039	0.885785
FBgn0016756	Usp47	12.3478	-0.181434	0.0825239	0.0279093	0.220206
FBgn0016762	angel	7.9246	0.0717067	0.112753	0.524802	0.805578
FBgn0016794	dos	10.1617	-0.0806781	0.0849212	0.342094	0.701789
FBgn0016797	fz2	13.4749	-0.0532724	0.0972667	0.583902	0.83988
FBgn0016917	Stat92E	12.1507	-0.112082	0.0804511	0.163567	0.520827
FBgn0016919	nompB	-0.447818	-0.0793924	2.93206	0.978398	NA
FBgn0016926	Pino	10.3675	0.00850619	0.0733179	0.907638	0.974741
FBgn0016930	Dyrk2	11.4299	0.144436	0.199983	0.470147	0.779208
FBgn0016970	l(2)k10201	7.66795	-0.125329	0.120738	0.299259	0.670792
FBgn0016974	swaPsi	-0.954625	1.22606	2.83678	0.665596	NA
FBgn0016977	spen	13.1361	-0.088527	0.141628	0.531928	0.808066
FBgn0016978	snRNP-U1-70K	11.4263	0.121851	0.0474335	0.0102028	0.122954
FBgn0016983	smid	12.2879	0.0116908	0.066118	0.859652	0.958257
FBgn0016984	sktl	10.9453	0.0110209	0.0645472	0.864427	0.959238
FBgn0017414	cag	8.56178	0.175071	0.102404	0.0873375	0.392328
FBgn0017418	ari-1	10.2266	0.0633074	0.0720416	0.379531	0.727498
FBgn0017424	asRNA:CR11538	7.80614	-3.70252	1.31864	0.00498752	0.0805401
FBgn0017429	CG5989	8.80516	0.183008	0.0841033	0.0295561	0.226937
FBgn0017430	Nelf-E	9.20163	-0.0469247	0.0916659	0.608714	0.850985
FBgn0017457	U2af38	10.8704	0.0893266	0.0694426	0.198325	0.561372
FBgn0017482	T3dh	7.30968	-0.0751447	0.112805	0.505319	0.794488
FBgn0017545	RpS3A	15.4928	0.176219	0.0922064	0.0559876	0.31465
FBgn0017550	Rga	12.0462	0.0437823	0.0525109	0.404408	0.743935
FBgn0017551	Rca1	10.046	0.0369961	0.0808296	0.647165	0.866127
FBgn0017558	Pdk	9.57073	-0.141698	0.0972958	0.145292	0.498411
FBgn0017566	ND-75	11.3817	0.0512811	0.0608739	0.399556	0.740781
FBgn0017567	ND-23	9.89858	0.160513	0.0772326	0.0376818	0.26008
FBgn0017572	Mo25	11.4831	0.119594	0.0711111	0.0926087	0.402196
FBgn0017577	Mcm5	11.19	-0.0499053	0.108159	0.644507	0.866106
FBgn0017578	Max	10.1136	0.115602	0.072527	0.110954	0.441131
FBgn0017579	RpL14	15.1636	0.0802169	0.0945405	0.396164	0.738728
FBgn0017581	Lk6	13.7084	-0.25992	0.0970925	0.00742758	0.103103
FBgn0017590	klg	0.780752	-0.26373	1.24366	0.83206	NA
FBgn0019624	COX5A	11.4199	0.15353	0.0899923	0.088001	0.393197
FBgn0019637	Atu	11.0437	0.0848791	0.0471302	0.0717107	0.35741
FBgn0019643	AANAT1	3.75161	0.0121243	0.474278	0.979605	0.99446
FBgn0019644	ATPsynB	12.1326	0.103306	0.0696218	0.137858	0.489628
FBgn0019650	toy	0.633956	-3.44307	2.28424	0.131729	NA
FBgn0019660	lncRNA:roX2	4.78097	0.361767	3.51003	0.91791	0.976131
FBgn0019661	lncRNA:roX1	9.37704	0.342236	1.4711	0.816041	0.942918
FBgn0019662	qm	9.44997	0.094488	0.0743411	0.203726	0.567871
FBgn0019686	lok	10.5286	-0.0885439	0.061005	0.146663	0.499362
FBgn0019830	colt	10.8342	0.092399	0.0694939	0.183651	0.545666
FBgn0019890	Smg5	11.8856	-0.14367	0.0750221	0.055488	0.3133
FBgn0019925	Surf4	11.8066	0.168731	0.0648291	0.00924916	0.116535
FBgn0019932	SamDC	9.13078	0.0607908	0.0927301	0.512103	0.798096
FBgn0019936	RpS20	14.9873	-0.0808111	0.0764617	0.290565	0.66404
FBgn0019938	RpI1	11.1184	-0.0445974	0.0831318	0.591637	0.842981
FBgn0019949	Cdk9	9.26657	0.00795245	0.0701986	0.909805	0.974741
FBgn0019952	Orct	7.54927	-0.0183129	0.194145	0.92485	0.977754
FBgn0019957	ND-42	10.8957	0.0863938	0.0503799	0.0863734	0.390879
FBgn0019960	Mitofilin	11.5604	0.0553953	0.0588049	0.346183	0.704952
FBgn0019968	Khc-73	11.4959	-0.0757006	0.11649	0.515793	0.799859
FBgn0019972	Drice	11.0004	0.133895	0.0633045	0.0344226	0.247419
FBgn0019982	Gs1l	8.60387	-0.0589168	0.13111	0.653164	0.869446
FBgn0019985	mGluR	2.24251	-0.403328	0.711987	0.571067	0.831165
FBgn0019990	Gcn2	10.6607	-0.202191	0.0777944	0.00934835	0.117026
FBgn0020018	Ppox	8.92798	-0.0316745	0.0743682	0.67017	0.877545
FBgn0020224	Cbl	10.5409	0.0226881	0.0617444	0.713283	0.897299
FBgn0020235	ATPsyngamma	12.3453	0.103728	0.0828784	0.210726	0.575221
FBgn0020236	ATPCL	12.1725	0.0751045	0.0725486	0.300561	0.670852
FBgn0020238	14-3-3epsilon	15.3246	0.0820273	0.0479307	0.0870126	0.391973
FBgn0020248	stet	0.615869	-0.993824	1.76861	0.574167	NA
FBgn0020249	stck	10.5491	0.0278195	0.0576622	0.629482	0.860581
FBgn0020251	sfl	9.68009	-0.0184007	0.0918795	0.841269	0.950893
FBgn0020255	Ran	13.9408	0.215579	0.0682431	0.00158319	0.0367855
FBgn0020257	Ppa	12.5512	0.0437973	0.0683641	0.521752	0.803749
FBgn0020258	ppk	5.25603	0.0943096	0.270409	0.727265	0.903277
FBgn0020261	pcm	11.3485	-0.0509532	0.0973413	0.600662	0.847039
FBgn0020269	mspo	6.58354	0.587199	0.190904	0.00209882	0.0455953
FBgn0020270	mre11	10.1416	-0.0638018	0.075831	0.400141	0.741436
FBgn0020272	mst	9.01891	-0.0438187	0.0707895	0.535917	0.809769
FBgn0020277	lush	1.13645	-0.717013	0.95242	0.451551	NA
FBgn0020278	loco	10.496	-0.0104318	0.0922939	0.910009	0.974741
FBgn0020279	lig	14.1107	0.00630067	0.108838	0.953836	0.985888
FBgn0020294	ko	11.866	-0.111898	0.0778775	0.15076	0.504796
FBgn0020299	stumps	10.1387	-0.17616	0.100261	0.0789145	0.374438
FBgn0020300	geko	8.68827	0.101282	0.169752	0.550741	0.820111
FBgn0020304	drongo	11.2699	-0.067097	0.0852015	0.430983	0.759333
FBgn0020305	dbe	9.86238	0.255013	0.0863205	0.00313424	0.0593119
FBgn0020306	dom	13.6223	-0.0369179	0.123339	0.764696	0.92039
FBgn0020307	dve	10.7051	-0.00385774	0.123613	0.975103	0.992704
FBgn0020309	crol	13.9368	-0.0563186	0.10243	0.582438	0.838894
FBgn0020312	Tmtc3	10.864	-0.0907183	0.0683231	0.18425	0.546166
FBgn0020369	Rpt6	12.0167	0.0831424	0.074626	0.265227	0.637032
FBgn0020370	TppII	12.0539	-0.00497276	0.0738322	0.946301	0.983732
FBgn0020372	TM4SF	2.96741	0.432471	0.646313	0.503409	0.79371
FBgn0020376	Sr-CIII	2.79919	-2.88476	1.04089	0.00558089	0.0873559
FBgn0020378	Sp1	5.76039	0.163569	0.820929	0.842069	0.951353
FBgn0020379	Rfx	8.4045	-0.144058	0.109347	0.187693	0.548511
FBgn0020381	Dredd	10.2414	0.115718	0.0926017	0.211434	0.57593
FBgn0020385	pug	10.2091	0.0977466	0.138652	0.480823	0.783525
FBgn0020386	Pdk1	10.9654	0.263499	0.149485	0.0779499	0.373101
FBgn0020388	Gcn5	10.2976	0.0485875	0.0728545	0.504829	0.794488
FBgn0020389	Papss	9.62837	0.118931	0.122136	0.330177	0.692594
FBgn0020391	Nrk	6.33708	0.0345437	0.20042	0.863157	0.958974
FBgn0020392	Nmt	11.2588	0.084556	0.0656374	0.197666	0.560927
FBgn0020399	Mst89B	3.0105	-0.392285	0.479391	0.413187	0.750584
FBgn0020407	asun	8.62425	-0.00941283	0.112644	0.933404	0.980246
FBgn0020412	JIL-1	11.0438	-0.0110183	0.113871	0.922916	0.977504
FBgn0020414	Idgf3	7.7612	-0.307286	0.328208	0.349143	0.707153
FBgn0020415	Idgf2	6.295	-0.998178	0.350629	0.0044158	0.0737667
FBgn0020416	Idgf1	6.69297	-2.01735	0.349837	8.09079e-09	1.05935e-06
FBgn0020440	Fak	10.3143	0.00249349	0.073018	0.972758	0.992152
FBgn0020443	eRF3	12.808	0.0748838	0.0728935	0.304277	0.672938
FBgn0020445	E23	8.51241	0.218586	0.44141	0.620459	0.855504
FBgn0020493	Dad	11.4876	-0.0116765	0.0713307	0.869971	0.961025
FBgn0020496	CtBP	14.1208	0.0372302	0.0448762	0.406754	0.745279
FBgn0020497	emb	12.5917	-0.0140104	0.083087	0.866094	0.959586
FBgn0020503	CLIP-190	10.663	-0.147349	0.0902529	0.102548	0.422265
FBgn0020506	Amyrel	-0.972254	3.71715	5.1221	0.468018	NA
FBgn0020508	Ag5r2	1.5564	5.42068	2.2809	0.0174752	0.168979
FBgn0020510	Abi	10.5975	0.132436	0.0488189	0.00667165	0.0983891
FBgn0020513	Paics	11.6754	0.0184574	0.071871	0.797323	0.93368
FBgn0020518	snoRNA:Me28S-G764	0.251891	0.98309	1.43571	0.493507	NA
FBgn0020521	pio	13.2999	0.149394	0.233563	0.522413	0.80382
FBgn0020545	kraken	9.1608	-0.215253	0.0990854	0.0298256	0.227902
FBgn0020616	SA	11.0897	-0.0156347	0.0702887	0.823975	0.946016
FBgn0020618	Rack1	15.6897	0.101194	0.0590412	0.086538	0.391099
FBgn0020620	RN-tre	10.3963	0.0538323	0.0532595	0.312133	0.68047
FBgn0020621	Pkn	11.9911	-0.00368532	0.116567	0.974779	0.992704
FBgn0020622	Pi3K21B	10.8625	-0.0307861	0.0850174	0.717266	0.899507
FBgn0020626	Osbp	10.4141	-0.102946	0.067713	0.128428	0.473194
FBgn0020633	Mcm7	11.6469	0.0722781	0.107621	0.50184	0.792555
FBgn0020637	Lcp65Ag2	3.19955	-0.931998	0.916482	0.309187	0.678029
FBgn0020638	Lcp65Ag1	-0.280977	-1.91366	2.80299	0.494783	NA
FBgn0020639	Lcp65Af	1.40106	-1.91302	1.30228	0.141836	0.495226
FBgn0020640	Lcp65Ae	-0.4779	-3.90705	3.91316	0.318067	NA
FBgn0020641	Lcp65Ad	2.49719	-2.90417	1.08266	0.007309	0.102337
FBgn0020647	KrT95D	10.29	-0.167193	0.117852	0.155995	0.511868
FBgn0020653	Trxr-1	13.1486	0.0879769	0.0415558	0.0342533	0.246567
FBgn0020655	ArfGAP1	10.4195	0.197875	0.101265	0.0506981	0.301593
FBgn0020660	eIF4B	10.5038	-0.0237264	0.0491628	0.629374	0.860581
FBgn0020762	Atet	9.13194	-0.0476694	0.179652	0.790746	0.931396
FBgn0020764	Alas	9.86391	0.0477976	0.0948318	0.614244	0.853662
FBgn0020767	Spred	11.1527	-0.22433	0.0618016	0.000283603	0.0104436
FBgn0020880	CG7179	1.2382	0.585931	1.16539	0.615122	NA
FBgn0020887	Su(z)12	10.8756	-0.0622102	0.064498	0.334781	0.696571
FBgn0020906	Jon25Bi	0.509661	2.21132	5.16176	0.668357	NA
FBgn0020907	Scp2	-0.0693056	-1.65411	1.78133	0.353105	NA
FBgn0020908	Scp1	-0.201597	-1.21074	1.63276	0.458372	NA
FBgn0020909	Rtc1	9.53689	0.0482264	0.115349	0.675881	0.880254
FBgn0020910	RpL3	16.4948	0.0482559	0.0564492	0.392631	0.735524
FBgn0020912	Ptx1	0.0864252	-0.74773	3.05965	0.806933	NA
FBgn0020930	Dgkepsilon	9.59194	0.0079413	0.0663079	0.90467	0.972847
FBgn0021738	Crg-1	-1.02007	1.30943	2.40711	0.586453	NA
FBgn0021742	C901	0.804627	0.028125	1.0838	0.979297	NA
FBgn0021750	SerRS-m	9.12122	0.0485707	0.0651863	0.456207	0.771141
FBgn0021760	chb	11.1855	-0.00209142	0.10366	0.983903	0.995377
FBgn0021761	Nup154	11.7318	-0.0846903	0.0602324	0.159707	0.516268
FBgn0021764	sdk	12.4298	-0.0218035	0.133454	0.870221	0.961191
FBgn0021765	scu	11.6991	0.0700933	0.0931807	0.451913	0.768593
FBgn0021767	org-1	-0.444022	3.08128	1.62652	0.0581721	NA
FBgn0021768	nudC	11.1646	0.0838695	0.0796827	0.292551	0.665184
FBgn0021776	mira	5.82502	-0.110304	0.288299	0.702015	0.892159
FBgn0021795	Tapdelta	12.2666	0.133112	0.111836	0.233951	0.602377
FBgn0021796	Tor	11.2961	0.00125189	0.120538	0.991713	0.997567
FBgn0021800	Reph	9.45649	-0.242229	0.0949993	0.0107785	0.126893
FBgn0021814	Vps28	9.5611	0.0289696	0.079979	0.717191	0.899507
FBgn0021825	DCTN2-p50	10.7025	0.0694758	0.0628581	0.269038	0.639699
FBgn0021847	Ttc7	9.4522	0.0115395	0.0852069	0.892272	0.968704
FBgn0021856	l(2)k14505	9.51412	0.0123633	0.0603427	0.837662	0.950802
FBgn0021872	Xbp1	12.2708	0.0925909	0.15961	0.561843	0.825678
FBgn0021874	Nle	9.69709	0.0871149	0.0645145	0.176915	0.539281
FBgn0021875	Zfrp8	9.08561	0.150478	0.0773035	0.0515845	0.303283
FBgn0021895	ytr	12.5434	0.0095411	0.0555631	0.86366	0.958974
FBgn0021906	RFeSP	10.7643	0.228289	0.0953812	0.0166914	0.164183
FBgn0021944	Coprox	10.2774	0.127508	0.0631613	0.0435104	0.279739
FBgn0021967	ND-PDSW	10.2943	0.184306	0.0891965	0.0388009	0.264022
FBgn0021979	l(2)k09913	12.3561	-0.212571	0.0409128	2.03934e-07	1.99587e-05
FBgn0021995	Rs1	10.7883	0.0471129	0.0561805	0.401695	0.741761
FBgn0022023	eIF3h	12.528	0.166772	0.073246	0.0227936	0.19596
FBgn0022027	Vps25	8.97492	0.167995	0.093798	0.0732876	0.36155
FBgn0022029	l(2)k01209	10.6647	-0.0801736	0.0455735	0.0785412	0.37378
FBgn0022069	Nnp-1	11.3573	0.170874	0.0586399	0.00356877	0.0643908
FBgn0022097	Vha36-1	10.4479	0.0962874	0.071811	0.179971	0.543052
FBgn0022153	l(2)k05819	11.0936	0.0418473	0.0700687	0.550352	0.820067
FBgn0022160	Gpo1	7.46053	-0.131827	0.183597	0.472742	0.780439
FBgn0022213	Cse1	12.4884	0.00390566	0.0704623	0.955797	0.987072
FBgn0022224	ubl	8.98015	0.0512056	0.111166	0.645068	0.866106
FBgn0022238	lolal	12.115	0.138835	0.0516634	0.00720303	0.101439
FBgn0022288	l(2)09851	10.6697	0.193107	0.0850053	0.0231041	0.197753
FBgn0022338	dnk	9.53951	0.0894744	0.147271	0.543485	0.815142
FBgn0022343	CG3760	11.9609	0.261982	0.0938811	0.0052616	0.0838481
FBgn0022344	CG10340	9.57469	0.0813828	0.0859847	0.343904	0.702841
FBgn0022349	CG1910	12.9251	0.0716264	0.08107	0.376959	0.725395
FBgn0022355	Tsf1	8.53698	-1.20712	0.444274	0.00658651	0.0979564
FBgn0022359	Sodh-2	4.58843	-0.197672	0.293119	0.500074	0.791138
FBgn0022361	Pur-alpha	11.4069	0.0876492	0.0684232	0.200198	0.563025
FBgn0022382	Pka-R2	9.3586	-0.0348449	0.0681696	0.609245	0.851336
FBgn0022699	D19B	10.3643	-0.00699494	0.0784184	0.928923	0.978297
FBgn0022702	Cht2	12.0465	-0.121618	0.0785986	0.121783	0.461084
FBgn0022709	Ak1	6.92327	-0.136464	0.161612	0.39845	0.740439
FBgn0022710	Ac13E	8.26781	-0.282889	0.174415	0.104819	0.426953
FBgn0022724	Taf8	8.87496	0.0939382	0.0850033	0.269111	0.639699
FBgn0022764	Sin3A	13.4534	-0.0505461	0.134904	0.707896	0.894413
FBgn0022768	Pp2C1	10.582	-0.131359	0.109925	0.232093	0.600467
FBgn0022770	Peritrophin-A	5.56192	-1.07122	0.380272	0.00484768	0.0789397
FBgn0022774	Oat	8.14371	0.229287	0.275194	0.404741	0.744408
FBgn0022786	Hira	9.71916	-0.0229085	0.0727569	0.752865	0.915576
FBgn0022787	Hel89B	11.3328	-0.0342718	0.118765	0.772912	0.924044
FBgn0022800	Cad96Ca	9.42732	-0.569112	0.164305	0.000532699	0.0171472
FBgn0022893	Df31	16.2848	0.037586	0.0648143	0.561979	0.825753
FBgn0022935	D19A	10.6128	-0.0483141	0.0680687	0.477838	0.782413
FBgn0022936	CycH	9.15695	-0.0159072	0.0787361	0.839891	0.950893
FBgn0022942	Cbp80	11.7481	0.0897956	0.0680158	0.186763	0.547528
FBgn0022943	Cbp20	9.42248	0.0970234	0.100376	0.333744	0.696547
FBgn0022959	yps	14.3142	-0.0452236	0.038521	0.240395	0.608825
FBgn0022960	vimar	10.81	-0.00184597	0.0699648	0.978951	0.99446
FBgn0022981	rpk	8.58869	-0.871114	0.155946	2.3237e-08	2.77955e-06
FBgn0022984	qkr58E-3	11.4696	-0.0447503	0.08638	0.604414	0.84813
FBgn0022985	qkr58E-2	10.7434	-0.00801575	0.055728	0.885629	0.966096
FBgn0022986	qkr58E-1	10.9811	0.0427858	0.0774547	0.580676	0.838726
FBgn0022987	qkr54B	10.9226	-0.0908889	0.0988589	0.357897	0.711462
FBgn0023000	mth	11.8561	0.0206197	0.0661218	0.755159	0.916884
FBgn0023001	melt	11.3041	-0.114444	0.0883953	0.195429	0.557244
FBgn0023023	CRMP	8.5135	-0.297637	0.198814	0.134378	0.48383
FBgn0023081	gek	10.9664	-0.0126578	0.0902034	0.888403	0.967299
FBgn0023083	fray	10.2889	0.0246216	0.0649936	0.704814	0.8931
FBgn0023090	dtr	5.81541	-1.5563	0.25127	5.87581e-10	9.3329e-08
FBgn0023094	cyc	9.73918	-0.0744393	0.0858763	0.386041	0.730822
FBgn0023095	caps	10.7413	0.0152668	0.0666085	0.818712	0.944072
FBgn0023096	btv	3.78063	0.306452	0.542838	0.572389	0.83184
FBgn0023097	bon	11.7772	-0.0691151	0.10194	0.497772	0.790441
FBgn0023129	aay	6.65543	1.00485	0.335745	0.00276333	0.0543081
FBgn0023130	a6	9.36495	-0.0308121	0.0785075	0.694708	0.889172
FBgn0023143	Uba1	14.0104	0.0324303	0.0671575	0.629167	0.860581
FBgn0023167	SmD3	11.7176	0.149657	0.091578	0.102216	0.4217
FBgn0023169	AMPKalpha	11.0103	-0.0379589	0.0415653	0.361119	0.713183
FBgn0023170	RpL39	13.538	0.113186	0.114786	0.324104	0.688179
FBgn0023171	rnh1	9.10938	-0.0312978	0.108566	0.773129	0.924063
FBgn0023172	RhoGEF2	12.2578	-0.0627312	0.122853	0.609616	0.851336
FBgn0023174	Prosbeta2	11.9525	0.136341	0.0776509	0.07912	0.374859
FBgn0023175	Prosalpha7	11.9349	0.235053	0.0879649	0.00753732	0.103882
FBgn0023177	Pp4-19C	11.9042	0.0983695	0.0496036	0.0473548	0.289412
FBgn0023179	amon	0.765135	-2.79872	1.57229	0.0750711	NA
FBgn0023180	Orc6	7.48495	-0.043697	0.133122	0.742724	0.910918
FBgn0023181	Orc4	9.31114	0.108379	0.10656	0.30912	0.678029
FBgn0023197	Jon74E	-0.756612	2.02372	3.40917	0.552772	NA
FBgn0023212	EloB	11.11	0.106857	0.0636969	0.0934269	0.403213
FBgn0023213	eIF4G1	13.4764	0.186116	0.103724	0.0727593	0.360044
FBgn0023214	edl	8.90593	0.0975631	0.0899025	0.277829	0.648242
FBgn0023215	Mnt	10.0025	-0.033112	0.278227	0.905267	0.97337
FBgn0023216	Parg	9.27911	-0.0824748	0.0734201	0.261299	0.633026
FBgn0023388	Dap160	10.4404	-0.102975	0.0842198	0.221446	0.587428
FBgn0023395	Chd3	8.16616	-0.251404	0.107112	0.0189199	0.175489
FBgn0023407	B4	11.298	-0.138894	0.102883	0.177011	0.539325
FBgn0023415	Acp32CD	1.15274	0.223992	0.996582	0.822166	NA
FBgn0023416	Ac3	8.57654	-2.42436	0.242209	1.38622e-23	1.03316e-20
FBgn0023441	fus	11.7373	-0.00104785	0.106395	0.992142	0.997567
FBgn0023458	Rbcn-3A	11.6953	-0.13829	0.177505	0.435934	0.76214
FBgn0023477	Taldo	11.8363	0.0242176	0.0652167	0.710384	0.895441
FBgn0023479	teq	8.03364	-0.547141	0.307203	0.0749056	0.366176
FBgn0023489	Pph13	0.682944	0.00426196	1.50767	0.997745	NA
FBgn0023496	Lip1	4.06613	-0.017717	0.472167	0.970068	0.992077
FBgn0023506	Es2	8.074	0.019146	0.089534	0.830672	0.949532
FBgn0023507	D2hgdh	7.84232	-0.393714	0.28584	0.168391	0.527489
FBgn0023508	Ocrl	9.95452	-0.0110048	0.0726568	0.879611	0.964456
FBgn0023509	mip130	10.8013	-0.0359659	0.0572613	0.529938	0.807502
FBgn0023510	Rbcn-3B	9.82499	-0.00158732	0.127654	0.990079	0.997567
FBgn0023511	Edem1	10.3532	-0.00745902	0.0813074	0.926906	0.977903
FBgn0023512	eIF2Bepsilon	10.2286	0.0497128	0.0498167	0.318321	0.683972
FBgn0023513	CG14803	9.75179	-0.220394	0.109659	0.0444505	0.281641
FBgn0023514	CG14805	9.86921	0.149207	0.0738381	0.0433069	0.279046
FBgn0023515	CG14814	10.1653	-0.15887	0.112213	0.156837	0.511868
FBgn0023516	Pex5	9.02484	-0.183227	0.0767961	0.0170378	0.165576
FBgn0023517	Pgam5	10.3888	0.198476	0.0917209	0.0304706	0.230622
FBgn0023518	trr	10.9857	-0.140399	0.134183	0.295411	0.667093
FBgn0023519	mRpL16	9.52439	0.124684	0.0863548	0.148781	0.502627
FBgn0023520	CG3857	8.92312	-0.0483679	0.0722949	0.503472	0.79371
FBgn0023521	CG3587	8.57559	0.245306	0.133423	0.0659798	0.342777
FBgn0023522	CG11596	10.1106	-0.0899826	0.0612436	0.141764	0.49515
FBgn0023523	Or2a	3.94172	-0.178516	0.388678	0.646026	0.866106
FBgn0023524	CG3078	0.128358	-1.52514	1.6633	0.359176	NA
FBgn0023525	CG3191	4.42014	0.322553	0.310739	0.299262	0.670792
FBgn0023526	CG2865	10.0209	0.272832	0.0901184	0.00246599	0.0510535
FBgn0023527	CG3071	9.60201	-0.130552	0.0708243	0.0652821	0.34043
FBgn0023528	CG2924	11.4056	-0.0227165	0.0545501	0.677093	0.880973
FBgn0023529	CG2918	12.6996	0.140118	0.139469	0.315063	0.683225
FBgn0023530	CG3740	8.01386	0.049543	0.12232	0.685458	0.885082
FBgn0023531	CG32809	9.1125	0.104755	0.1445	0.468484	0.777916
FBgn0023534	CG17778	3.15165	0.122397	0.541512	0.821179	0.945001
FBgn0023535	arg	5.33271	-0.785942	0.339484	0.0206072	0.185906
FBgn0023536	CG3156	8.08517	0.0327773	0.0961912	0.733291	0.906579
FBgn0023537	CG17896	11.6036	-0.116744	0.0562989	0.0381129	0.261935
FBgn0023540	CG3630	9.96413	-0.236833	0.0931089	0.0109713	0.128221
FBgn0023541	Cyp4d14	5.79878	-1.60785	0.262803	9.47184e-10	1.41189e-07
FBgn0023542	Nmd3	10.0507	0.0666406	0.0687414	0.332326	0.695595
FBgn0023545	PIG-K	9.71733	-0.12324	0.104335	0.237526	0.606906
FBgn0023549	Mct1	7.28339	-0.22986	0.413149	0.577964	0.836634
FBgn0023550	FarO	-0.811957	-0.657529	2.10071	0.754278	NA
FBgn0024150	Ac78C	5.09281	0.249681	0.305208	0.413318	0.750584
FBgn0024179	wit	10.5958	0.0295323	0.0677623	0.662966	0.874374
FBgn0024183	vig	12.3536	-0.0118926	0.0636804	0.851854	0.954891
FBgn0024184	unc-4	1.97257	0.780403	1.24079	0.529378	0.807502
FBgn0024187	syd	10.0122	-0.0932587	0.100093	0.35148	0.707401
FBgn0024188	san	10.2558	0.212146	0.0964233	0.0277959	0.220028
FBgn0024189	sns	9.30518	0.27017	0.135998	0.0469695	0.288432
FBgn0024191	sip1	9.15185	0.0384855	0.0792982	0.627445	0.85951
FBgn0024194	rasp	9.53911	-0.324418	0.0594005	4.72007e-08	5.38032e-06
FBgn0024196	robl	9.87584	0.0223161	0.0927886	0.809939	0.939381
FBgn0024222	IKKbeta	9.05075	-0.112371	0.0796818	0.158466	0.514232
FBgn0024227	aurB	10.3867	-0.120881	0.108829	0.26668	0.638235
FBgn0024230	Hs2st	8.79342	0.0886622	0.0914528	0.332303	0.695595
FBgn0024232	gprs	3.05914	-0.856675	0.607482	0.158478	0.514232
FBgn0024234	gbb	11.9246	0.111475	0.0477772	0.0196366	0.179659
FBgn0024236	foi	10.8614	-0.0947847	0.0515794	0.0661144	0.343041
FBgn0024238	Fim	11.4293	0.0684729	0.107877	0.525605	0.805869
FBgn0024244	drm	11.1257	-0.123468	0.0832894	0.138236	0.490611
FBgn0024245	dnt	10.3574	0.0887625	0.0910187	0.329455	0.691978
FBgn0024248	chico	10.0623	0.0935386	0.0667895	0.161364	0.517915
FBgn0024249	cato	2.89268	-0.147155	0.50031	0.76866	0.922297
FBgn0024250	brk	10.9958	0.0217578	0.0970175	0.82255	0.945284
FBgn0024251	bbx	1.46247	-0.389609	1.21293	0.748048	0.913746
FBgn0024273	WASp	9.54453	-0.000874555	0.0815836	0.991447	0.997567
FBgn0024277	trio	12.2489	-0.0573956	0.115388	0.618896	0.854997
FBgn0024285	Srp54	11.893	0.0687594	0.0580654	0.236345	0.605486
FBgn0024288	Sox100B	6.59141	-0.143188	0.202399	0.479285	0.783525
FBgn0024289	Sodh-1	2.36702	-2.52752	1.32081	0.0556694	0.313765
FBgn0024291	Sirt1	11.0636	-0.000105711	0.0696315	0.998789	0.999243
FBgn0024293	Spn43Ab	1.51428	-2.20342	1.4057	0.117	0.452901
FBgn0024294	Spn43Aa	12.5883	0.196252	0.364857	0.590655	0.842588
FBgn0024314	Plap	11.3983	0.0310993	0.0627019	0.619904	0.855319
FBgn0024315	Picot	4.15235	-0.141564	0.522218	0.786328	0.928887
FBgn0024320	Npc1a	11.3245	0.100405	0.0811968	0.216251	0.581855
FBgn0024321	NK7.1	8.61649	-0.0574537	0.107231	0.592102	0.842981
FBgn0024326	Mkk4	11.0153	0.0112957	0.0628226	0.857307	0.957185
FBgn0024329	Mekk1	11.4837	-0.0890992	0.0989497	0.367881	0.720317
FBgn0024330	MED6	9.79947	-0.004051	0.065898	0.950982	0.984931
FBgn0024352	Stip1	12.5523	0.111348	0.0795664	0.161682	0.518034
FBgn0024360	MTPAP	9.0646	-0.225556	0.0697861	0.00122882	0.0313862
FBgn0024361	Tsp2A	3.36391	-0.607944	0.564434	0.281441	0.652053
FBgn0024362	Naa30A	10.6505	-0.0138139	0.0534679	0.79613	0.933351
FBgn0024364	CG11417	10.1554	0.10818	0.0701946	0.123283	0.463521
FBgn0024365	CG12773	10.772	0.0113107	0.0699029	0.871459	0.961791
FBgn0024366	CG11409	8.37656	-0.064106	0.11864	0.588961	0.842372
FBgn0024371	E2f2	9.96941	0.0498331	0.0705395	0.479904	0.783525
FBgn0024432	Dlc90F	11.2995	0.0795586	0.0641016	0.214556	0.579163
FBgn0024491	Bin1	10.1826	0.166228	0.0815871	0.0416065	0.274422
FBgn0024509	Sec13	11.475	0.105621	0.0788636	0.180477	0.543394
FBgn0024510	dlt	8.17605	0.160725	0.123382	0.192692	0.55417
FBgn0024542	Neos	9.06946	0.123002	0.0749497	0.100772	0.419962
FBgn0024555	flfl	12.3787	-0.039556	0.0763464	0.60438	0.84813
FBgn0024556	mEFTu1	11.3035	-0.00340353	0.0713847	0.961972	0.989354
FBgn0024558	Dph5	10.7078	-0.0346034	0.0801172	0.665807	0.875821
FBgn0024689	fws	9.93259	0.00117849	0.0781559	0.987969	0.996921
FBgn0024698	Cpsf160	10.5165	0.0662682	0.0812338	0.414631	0.750993
FBgn0024728	Slip1	11.5081	0.163205	0.0547785	0.00288847	0.055639
FBgn0024732	Drep1	8.5372	0.037031	0.113329	0.743852	0.911676
FBgn0024733	RpL10	15.4374	0.0158698	0.0656214	0.808905	0.939325
FBgn0024734	PRL-1	8.95251	-0.027759	0.216051	0.897766	0.969728
FBgn0024740	Lip2	-0.813221	-1.832	2.89322	0.5266	NA
FBgn0024754	Flo1	10.8401	-0.0944956	0.0942088	0.315839	0.683459
FBgn0024804	Dbp80	11.4262	-0.0743976	0.0534025	0.163575	0.520827
FBgn0024806	DIP2	11.3514	-0.0698861	0.0910116	0.442558	0.765158
FBgn0024807	DIP1	12.612	-0.0623364	0.0558044	0.263972	0.635684
FBgn0024811	Crk	11.6882	0.132782	0.0710561	0.061665	0.331009
FBgn0024814	Clc	12.0825	0.210222	0.0797132	0.00835853	0.110185
FBgn0024833	AP-1mu	10.849	0.114562	0.0548294	0.0366695	0.256713
FBgn0024836	stan	11.8399	-0.0988816	0.167508	0.554982	0.822835
FBgn0024841	Pcd	9.99382	-0.276024	0.10449	0.00825053	0.109356
FBgn0024846	p38b	9.97342	0.0155453	0.0619483	0.801861	0.936277
FBgn0024887	kin17	9.50755	0.113628	0.0802079	0.156578	0.511868
FBgn0024889	Kap-alpha1	10.4094	0.0676582	0.0497181	0.173566	0.535185
FBgn0024897	b6	2.79954	1.18264	0.745494	0.112651	0.443869
FBgn0024909	Taf7	8.8591	0.113827	0.0698789	0.10333	0.424403
FBgn0024912	agt	8.83827	-0.265134	0.0975091	0.00654652	0.0979564
FBgn0024913	Actbeta	-1.15239	-0.0172489	2.40514	0.994278	NA
FBgn0024920	Ts	10.0692	0.154696	0.138682	0.264648	0.6363
FBgn0024921	Tnpo	11.6359	0.0415202	0.100115	0.678342	0.881584
FBgn0024941	RSG7	2.47635	0.0266716	0.854199	0.975091	0.992704
FBgn0024943	PIP82	-1.13306	2.02555	3.56118	0.5695	NA
FBgn0024944	Oamb	-0.387181	-1.24892	2.02067	0.536528	NA
FBgn0024945	NitFhit	9.20635	-0.182794	0.0729258	0.0121906	0.135773
FBgn0024947	NTPase	10.2678	0.0711784	0.0724293	0.325741	0.689406
FBgn0024956	Mat1	10.0015	-0.0316994	0.0660566	0.63131	0.860581
FBgn0024957	Irp-1B	11.2795	-0.0304012	0.0709043	0.668095	0.876639
FBgn0024958	Irp-1A	10.6158	-0.109773	0.0445832	0.0138085	0.145741
FBgn0024963	GluClalpha	0.661291	0.404976	1.63322	0.804163	NA
FBgn0024973	CG2701	9.98013	-0.0269702	0.0637216	0.672112	0.878351
FBgn0024975	CG2712	7.91507	-0.0162965	0.091957	0.859337	0.958236
FBgn0024980	Syx4	3.04515	0.868014	0.605928	0.151991	0.506235
FBgn0024983	CG4293	9.97221	0.136637	0.0931121	0.142255	0.495545
FBgn0024984	CG3457	3.61125	-0.0808099	0.553614	0.883947	0.965169
FBgn0024985	Rilpl	10.6191	0.0324929	0.0636024	0.609438	0.851336
FBgn0024986	CG3719	8.96215	0.0279799	0.102621	0.78512	0.927862
FBgn0024987	ssx	11.4504	0.0642392	0.0586388	0.273295	0.643337
FBgn0024989	CG3777	11.1716	-0.0393316	0.114438	0.731077	0.905767
FBgn0024991	CG2694	10.0108	-0.15143	0.104066	0.145632	0.498411
FBgn0024992	Spg7	9.54087	-0.0257694	0.0606795	0.671069	0.877857
FBgn0024993	CG2662	8.06059	0.00226019	0.101817	0.98229	0.99479
FBgn0024994	Ugalt	9.84225	-0.0309426	0.0801365	0.699405	0.890946
FBgn0024995	CG2680	-0.327762	-0.684361	1.88106	0.715995	NA
FBgn0024996	eIF2Bbeta	9.99861	0.0231047	0.0646621	0.720856	0.90142
FBgn0024997	CG2681	-0.0941485	-1.98424	1.83929	0.280672	NA
FBgn0024998	CG2685	9.48847	-0.0512614	0.0622517	0.41025	0.748712
FBgn0025109	Bem46	8.48125	-0.0740447	0.0872256	0.395944	0.738566
FBgn0025111	Ant2	6.90917	0.474333	0.185865	0.0107097	0.126845
FBgn0025118	tRNA:Pro-CGG-3-1	1.43228	-1.82441	1.38746	0.188535	0.549222
FBgn0025185	az2	8.73083	-0.210498	0.108812	0.0530494	0.306209
FBgn0025186	ari-2	10.0163	0.0279557	0.0833512	0.737326	0.90905
FBgn0025335	Cpes	9.03399	0.0546947	0.0996519	0.583104	0.839272
FBgn0025336	CG4882	9.41738	0.145307	0.0823818	0.0777623	0.373101
FBgn0025352	Mtpbeta	11.9125	0.0598664	0.0631942	0.343465	0.702519
FBgn0025360	Optix	8.60649	0.2464	0.0833103	0.0031003	0.0588997
FBgn0025366	Ip259	12.4032	0.0956537	0.0984233	0.33112	0.69424
FBgn0025373	Fpps	10.7578	-0.0183975	0.0726349	0.800047	0.935286
FBgn0025381	rush	10.2362	-0.172658	0.0674588	0.0104837	0.12494
FBgn0025382	Rab27	8.57515	-0.223961	0.188154	0.233926	0.602377
FBgn0025383	CG14780	0.225597	-0.42327	1.25322	0.735554	NA
FBgn0025387	CG12184	3.51882	1.69327	0.5005	0.00071657	0.0218329
FBgn0025388	CG12179	9.8715	-0.159896	0.112817	0.156395	0.511868
FBgn0025390	Mur2B	5.12689	-0.0594252	0.342015	0.862062	0.958974
FBgn0025391	Scgdelta	0.0888064	3.71637	1.97704	0.0601405	NA
FBgn0025393	CG14795	1.0401	-1.49404	1.23616	0.226814	NA
FBgn0025394	inc	11.5877	0.0639906	0.0547504	0.242497	0.610908
FBgn0025454	Cyp6g1	9.28857	-2.62144	1.1692	0.0249564	0.206424
FBgn0025455	CycT	11.5263	-0.0519309	0.0869817	0.550485	0.820067
FBgn0025456	CREG	8.14801	-0.179424	0.22805	0.431414	0.759333
FBgn0025457	Bub3	11.6996	0.09635	0.0675118	0.153534	0.508232
FBgn0025463	Bap60	12.4199	-0.0414524	0.0417036	0.320234	0.685622
FBgn0025469	slv	8.87659	-0.0303101	0.0725507	0.676109	0.880254
FBgn0025519	fidipidine	9.89127	-0.0224149	0.0561904	0.68996	0.886466
FBgn0025525	bab2	10.0568	-0.0110722	0.117404	0.924864	0.977754
FBgn0025549	unc-119	10.3314	-0.1015	0.0554607	0.0672321	0.345883
FBgn0025558	CG4101	8.5096	0.0522813	0.111036	0.637748	0.86349
FBgn0025571	SF1	12.1915	0.0183701	0.0417428	0.659881	0.872725
FBgn0025574	Pli	10.9547	0.0513964	0.0753282	0.495049	0.788664
FBgn0025578	Lcp9	5.19009	-4.07785	0.933276	1.24591e-05	0.000783669
FBgn0025582	eIF3e	12.839	-0.00776278	0.0585383	0.894502	0.96901
FBgn0025592	Gk1	9.34348	-0.0204622	0.0837703	0.807025	0.938462
FBgn0025595	AkhR	2.49949	-4.03009	1.60808	0.0122054	0.135773
FBgn0025608	Faf2	10.2883	0.0665002	0.0569191	0.242675	0.611038
FBgn0025615	Torsin	11.0291	-0.0318694	0.0459141	0.487614	0.78668
FBgn0025616	CG13359	-0.23446	-1.4338	1.98381	0.469833	NA
FBgn0025620	CG13360	4.95346	-1.47788	0.87307	0.090505	0.39823
FBgn0025621	CG16989	10.1866	-0.233111	0.0710774	0.00103928	0.0285256
FBgn0025624	CG4025	8.71202	-0.149407	0.0875789	0.0880143	0.393197
FBgn0025625	Sik2	5.17122	-0.973883	0.395829	0.0138797	0.146016
FBgn0025626	CG4281	10.6904	0.0119337	0.0455597	0.793371	0.932772
FBgn0025627	CG4194	5.65847	-0.160991	0.255478	0.528593	0.807502
FBgn0025628	CG4199	11.5383	-0.0510841	0.0954188	0.592396	0.843086
FBgn0025629	CG4045	9.57381	-0.000196975	0.098337	0.998402	0.999189
FBgn0025630	Rtca	10.4446	-0.00868638	0.0759449	0.908939	0.974741
FBgn0025631	moody	6.84351	0.413426	0.194355	0.0334061	0.242451
FBgn0025632	CG4313	7.5994	-0.0250851	0.143648	0.861371	0.958974
FBgn0025633	CG13366	11.6503	-0.149064	0.0889466	0.0937619	0.404119
FBgn0025634	CG13367	9.47472	0.0575206	0.0820144	0.483086	0.785066
FBgn0025635	CG17829	9.20346	-0.00841864	0.079109	0.915251	0.976131
FBgn0025637	SkpA	12.297	0.0235368	0.0618848	0.703699	0.892855
FBgn0025638	Roc1a	11.8572	0.103507	0.0742657	0.163395	0.520827
FBgn0025639	Hmt4-20	12.2197	-0.155706	0.110346	0.158226	0.514153
FBgn0025640	CG13369	8.88254	-0.152494	0.1189	0.199654	0.563025
FBgn0025641	DAAM	10.4984	-0.0603801	0.201518	0.764462	0.920358
FBgn0025642	CG32812	1.92976	-1.81197	1.09494	0.097952	0.413893
FBgn0025643	CG3588	4.88829	-1.91466	0.566162	0.000720073	0.0218708
FBgn0025644	CG14424	-0.133821	-2.2714	1.61525	0.159657	NA
FBgn0025674	CycK	11.0788	0.233076	0.0464727	5.29423e-07	4.93228e-05
FBgn0025676	CkIIalpha-i3	8.76765	-0.485874	0.125233	0.000104562	0.00456351
FBgn0025678	CaBP1	12.5634	0.317916	0.0980636	0.00118722	0.0309221
FBgn0025680	cry	-0.157515	0	2.57522	1	NA
FBgn0025681	CG3558	10.635	0.029483	0.0889613	0.740332	0.909827
FBgn0025682	scf	10.6315	0.0684572	0.0959584	0.475595	0.781403
FBgn0025683	CG3164	11.8426	-0.0640937	0.0526542	0.223506	0.589425
FBgn0025684	MFS18	8.76969	0.0297014	0.107946	0.783201	0.927115
FBgn0025686	Amnionless	1.54919	2.15881	1.23246	0.0798384	0.375512
FBgn0025692	Lfg	3.71729	-0.794064	0.449314	0.0771811	0.372438
FBgn0025693	ZnT41F	8.76037	-0.154574	0.175851	0.379401	0.727498
FBgn0025697	santa-maria	4.28691	-0.383383	2.26568	0.865629	0.95951
FBgn0025700	CG5885	12.0653	0.244625	0.147084	0.0962805	0.410049
FBgn0025702	Srpk79D	4.59815	-0.22197	0.338234	0.511657	0.797786
FBgn0025709	CNT2	5.00371	0.256005	0.365933	0.484179	0.785348
FBgn0025712	CG13920	5.16563	-0.0195094	0.246855	0.937007	0.981674
FBgn0025716	Bap55	11.1941	0.0677218	0.0556615	0.223729	0.589693
FBgn0025720	Ate1	10.1557	-0.187408	0.0577197	0.0011668	0.0308041
FBgn0025724	beta'COP	12.0884	0.0426347	0.0853462	0.617392	0.854797
FBgn0025725	alphaCOP	12.2017	0.0311707	0.105814	0.768315	0.922226
FBgn0025726	unc-13	12.1359	-0.895222	0.128744	3.5627e-12	7.34447e-10
FBgn0025739	pon	10.8128	-0.195832	0.088668	0.0272029	0.217678
FBgn0025740	PlexB	11.1915	-0.133681	0.146714	0.362206	0.714167
FBgn0025741	PlexA	13.0813	0.0760133	0.0947195	0.422258	0.753105
FBgn0025742	mtm	10.3441	-0.034578	0.0549908	0.529482	0.807502
FBgn0025743	mbt	11.116	-0.0270217	0.0509973	0.596205	0.845424
FBgn0025777	homer	10.573	0.0639164	0.068888	0.353495	0.708394
FBgn0025781	Cdc16	9.88002	0.0640459	0.0821497	0.435612	0.76214
FBgn0025790	TBPH	11.1783	0.0366018	0.0460842	0.427058	0.75617
FBgn0025800	Smox	11.8358	-0.123954	0.0693074	0.0737006	0.362513
FBgn0025802	Sbf	9.7976	-0.0137019	0.121287	0.910053	0.974741
FBgn0025807	Rad9	8.33775	0.0285223	0.118861	0.810358	0.939519
FBgn0025808	Rad17	8.19881	0.240291	0.097224	0.0134541	0.143882
FBgn0025809	Paf-AHalpha	10.4548	0.0608824	0.0627356	0.331817	0.69498
FBgn0025814	Mgstl	11.1595	0.661248	0.131906	5.35856e-07	4.94467e-05
FBgn0025815	Mcm6	11.6156	-0.00116489	0.100552	0.990757	0.997567
FBgn0025820	JTBR	8.49676	0.200384	0.0906019	0.0269876	0.216459
FBgn0025830	IntS8	9.57085	-0.0241137	0.0671025	0.719329	0.900928
FBgn0025832	Fen1	9.70879	0.0744331	0.0885237	0.400445	0.741715
FBgn0025835	CG17707	3.57009	-0.00661538	0.458971	0.9885	0.997145
FBgn0025836	RhoGAP1A	12.1355	0.022544	0.100643	0.822757	0.945298
FBgn0025839	ND-B14.5A	9.21485	0.143947	0.0953921	0.131298	0.47789
FBgn0025864	Crag	11.76	-0.13987	0.10898	0.199337	0.562821
FBgn0025865	Cortactin	11.6972	0.100347	0.0669384	0.133849	0.483225
FBgn0025866	CalpB	9.96158	-0.10276	0.0643639	0.110366	0.440088
FBgn0025874	Meics	8.97861	-0.0530468	0.0884258	0.548572	0.818544
FBgn0025878	wrapper	4.48257	1.00487	0.396717	0.0113099	0.1303
FBgn0025879	Timp	7.86951	-0.436699	0.163664	0.00762426	0.104233
FBgn0025881	snoRNA:Me18S-A1576	2.25738	-1.01265	0.56103	0.071078	0.355581
FBgn0025882	snoRNA:MeU6-A47	-0.606393	2.05107	1.78878	0.251535	NA
FBgn0025885	Inos	11.0527	0.130872	0.0872923	0.133811	0.483225
FBgn0025936	Eph	12.328	0.140723	0.0725548	0.0524355	0.305838
FBgn0026015	Top3beta	10.7513	-0.126714	0.0604622	0.0361031	0.254587
FBgn0026056	Rlip	9.8604	-0.0890119	0.0763338	0.243579	0.612678
FBgn0026059	Mhcl	10.7234	-0.0701784	0.106039	0.50809	0.795363
FBgn0026060	Mipp2	6.86185	-0.0942992	0.171824	0.583133	0.839272
FBgn0026061	Mipp1	3.5351	0.410621	0.482249	0.394508	0.737161
FBgn0026076	UBL3	10.343	-0.0120317	0.064057	0.851012	0.954509
FBgn0026077	Gasp	11.5069	-0.0697696	0.121207	0.564868	0.827425
FBgn0026079	Nsun2	10.4009	0.203561	0.0731865	0.00541241	0.0856876
FBgn0026080	Tip60	9.27605	-0.0338315	0.0761651	0.656907	0.871406
FBgn0026083	tyf	12.1414	-0.0831691	0.105526	0.430617	0.759333
FBgn0026084	cib	14.1908	0.210012	0.12036	0.0810091	0.37812
FBgn0026085	dgt4	8.19161	-0.0220022	0.156181	0.887968	0.967299
FBgn0026086	Adar	11.5007	-0.103167	0.0840618	0.219719	0.58607
FBgn0026088	CG14818	9.093	-0.0435339	0.112938	0.699892	0.890981
FBgn0026089	CG14817	8.61108	-0.0610733	0.0943642	0.517497	0.800962
FBgn0026090	CG14812	8.96769	-0.0431009	0.113474	0.704071	0.892855
FBgn0026143	Cdc45	10.1671	0.0215844	0.0965671	0.823133	0.945415
FBgn0026144	CBP	12.4682	0.0437243	0.137904	0.751195	0.914938
FBgn0026147	TTLL4A	10.2163	-0.0397689	0.0796743	0.617678	0.854797
FBgn0026148	CG12253	8.86909	0.151317	0.0858502	0.0779723	0.373101
FBgn0026149	BCL7-like	10.5832	0.0414874	0.0491727	0.398833	0.74046
FBgn0026150	ApepP	10.8344	0.071282	0.0632195	0.259518	0.6313
FBgn0026160	tna	12.6499	-0.0198744	0.120465	0.86896	0.96088
FBgn0026169	snoRNA:Psi18S-1820	1.70989	-0.0990472	0.744178	0.894117	0.968845
FBgn0026176	SkpB	3.13945	1.31016	0.524274	0.0124546	0.137784
FBgn0026179	siz	10.379	-0.0360965	0.116892	0.757472	0.918082
FBgn0026181	Rok	11.6912	-0.0302198	0.102225	0.76752	0.921714
FBgn0026189	promL	12.2822	-0.2204	0.0766688	0.004044	0.0705988
FBgn0026190	PH4alphaMP	1.33186	-2.02155	1.47662	0.170988	NA
FBgn0026192	par-6	11.1693	0.0127851	0.0528734	0.808931	0.939325
FBgn0026196	nop5	12.6642	0.0912327	0.0692579	0.187742	0.548511
FBgn0026197	lncRNA:noe	6.35947	-0.160745	0.315518	0.610428	0.851709
FBgn0026199	myo	11.1218	0.06422	0.0672131	0.339341	0.699777
FBgn0026206	mei-P26	11.1522	-0.176112	0.103779	0.0896989	0.395762
FBgn0026207	mbo	10.5203	0.0258711	0.054625	0.635776	0.862508
FBgn0026238	gus	11.546	-0.00892351	0.0392224	0.820027	0.944625
FBgn0026239	gukh	11.8649	-0.0956048	0.12581	0.447307	0.766484
FBgn0026250	eIF1A	12.5412	0.165705	0.0611919	0.00676984	0.0990782
FBgn0026252	msk	12.8904	-0.0311008	0.0384177	0.418203	0.751509
FBgn0026257	cav	9.11686	-0.0469082	0.110322	0.670696	0.877833
FBgn0026259	eIF5B	12.3594	-0.0239629	0.0625731	0.70175	0.892159
FBgn0026261	bonsai	9.43623	0.0149062	0.0706486	0.832895	0.950137
FBgn0026262	bip2	12.0572	0.105358	0.0533766	0.0483967	0.292889
[truncated: 9,575 more rows]

## Sheet: D. DESEQ2_Exp.1_PW_Mix_A_vs_C
Extended Data Table 1D| Differential expression analysis (DESeq2) in Mix assimilated vs control from selection experiment 1 in pupal wing.
GENEID	Symbol	log2BaseMean	log2FC	Stderr_log2FC	pvalue	padjust
FBgn0000003	7SLRNA:CR32864	0.575925	0.027044	1.89532	0.988616	0.997849
FBgn0000008	a	12.8801	0.122233	0.108784	0.261172	0.711773
FBgn0000014	abd-A	4.05692	-0.914398	0.41349	0.0270071	0.237605
FBgn0000015	Abd-B	0.946073	0.29987	1.42131	0.832902	0.966095
FBgn0000017	Abl	11.7881	0.0220558	0.0905287	0.807515	0.96086
FBgn0000018	abo	7.80249	-0.0484449	0.0949607	0.609941	0.905578
FBgn0000022	ac	7.95479	-0.210636	0.107239	0.0495096	0.336971
FBgn0000024	Ace	6.26593	-0.187313	0.236328	0.428012	0.827873
FBgn0000028	acj6	3.50956	-0.148454	0.453713	0.743519	0.946089
FBgn0000032	Acph-1	8.99701	-0.0783472	0.0655078	0.231698	0.679826
FBgn0000036	nAChRalpha1	0.744641	-1.23172	1.28387	0.337364	0.774338
FBgn0000037	mAChR-A	4.19211	-1.27085	0.423858	0.00271507	0.0482873
FBgn0000038	nAChRbeta1	1.4193	-0.874294	0.879442	0.320151	0.760208
FBgn0000039	nAChRalpha2	0.258362	-3.73756	1.8162	0.0395992	0.298471
FBgn0000042	Act5C	15.4071	-0.0901041	0.0511317	0.0780361	0.425578
FBgn0000043	Act42A	14.3765	-0.00981505	0.0568761	0.86299	0.971973
FBgn0000044	Act57B	7.98381	-0.375642	0.54994	0.494569	0.856305
FBgn0000045	Act79B	3.29078	0.290893	0.785867	0.711267	0.936972
FBgn0000046	Act87E	9.00372	-0.496214	0.596193	0.405237	0.815659
FBgn0000047	Act88F	7.93652	-0.370068	0.522749	0.478991	0.852181
FBgn0000052	Pfas	10.2437	0.104046	0.0558511	0.0624735	0.379495
FBgn0000053	Gart	9.56313	-0.225305	0.0786633	0.00418106	0.0664949
FBgn0000057	adp	9.30415	0.0326426	0.0774227	0.673306	0.92433
FBgn0000061	al	10.282	0.254649	0.116002	0.0281487	0.244674
FBgn0000063	Mps1	6.97522	0.0396765	0.141571	0.779279	0.950886
FBgn0000064	Ald1	11.3447	0.0846745	0.0575504	0.141207	0.548623
FBgn0000071	Ama	8.78553	-0.00288394	0.14348	0.983964	0.997161
FBgn0000075	amd	8.24211	0.103709	0.162615	0.523634	0.868985
FBgn0000077	amx	7.45064	-0.177123	0.109524	0.105834	0.485094
FBgn0000083	AnxB9	11.4565	-0.0823076	0.0480866	0.0869603	0.444287
FBgn0000084	AnxB10	8.03165	-0.244832	0.101	0.0153475	0.167723
FBgn0000092	dyw	3.96856	0.67403	0.562259	0.23061	0.67817
FBgn0000097	aop	12.6662	0.124169	0.071429	0.0821482	0.436496
FBgn0000100	RpLP0	14.5628	0.0634184	0.0485077	0.191081	0.62776
FBgn0000108	Appl	10.3042	-0.267421	0.121791	0.0281107	0.244527
FBgn0000109	Aprt	8.32684	-0.207748	0.112409	0.0645803	0.385418
FBgn0000114	bru1	7.06899	-0.0967383	0.512311	0.850228	0.96851
FBgn0000115	Arl1	9.77836	0.0497043	0.0530098	0.348428	0.780096
FBgn0000116	Argk	12.7736	-0.0380323	0.154629	0.805714	0.960315
FBgn0000117	arm	14.7084	0.0220931	0.0376023	0.556838	0.88514
FBgn0000119	arr	12.6189	0.00393537	0.0905815	0.965346	0.992786
FBgn0000120	Arr1	-1.0371	0.815438	2.39763	0.73378	NA
FBgn0000121	Arr2	2.79665	0.879615	0.602586	0.144363	0.554001
FBgn0000137	ase	2.85552	-0.176304	0.552107	0.749477	0.947018
FBgn0000139	ash2	9.16509	0.0641483	0.0620429	0.301167	0.745245
FBgn0000140	asp	7.40108	-0.0107978	0.235949	0.963499	0.992482
FBgn0000146	aub	3.78976	-0.187043	0.420087	0.656141	0.920515
FBgn0000147	aurA	6.43665	-0.308735	0.185819	0.0966173	0.46443
FBgn0000150	awd	13.148	-0.0382485	0.0694149	0.581625	0.893164
FBgn0000152	Axs	8.9198	0.30156	0.0772318	9.43757e-05	0.00332811
FBgn0000153	b	4.25505	0.166978	0.343066	0.626454	0.914523
FBgn0000157	Dll	11.1612	0.175819	0.0927323	0.0579615	0.365452
FBgn0000158	bam	2.07199	4.103	1.32138	0.00190221	0.0372032
FBgn0000163	baz	11.5272	0.118666	0.0922039	0.198095	0.635462
FBgn0000173	ben	12.3054	-0.00865298	0.04193	0.836504	0.966496
FBgn0000179	bi	11.3533	0.0209767	0.0819269	0.797919	0.956674
FBgn0000180	bib	9.27561	-0.127632	0.102736	0.214115	0.655826
FBgn0000181	bic	13.4322	0.0861581	0.0461777	0.06207	0.377766
FBgn0000183	BicD	11.9274	-0.0487785	0.0401669	0.224596	0.671147
FBgn0000206	boss	5.96227	-0.117454	0.178479	0.510484	0.863944
FBgn0000212	brm	12.2913	0.0240183	0.0592819	0.685364	0.92787
FBgn0000216	Brd	4.00757	-0.487932	0.527583	0.355046	0.784328
FBgn0000221	brn	7.27798	0.0568171	0.123159	0.64456	0.917162
FBgn0000228	Bsg25D	10.393	0.0472842	0.0498626	0.342982	0.776267
FBgn0000229	bsk	10.3516	0.0288724	0.0593752	0.626775	0.914761
FBgn0000233	btd	4.77394	0.418639	0.452866	0.355267	0.784415
FBgn0000239	bur	10.8007	0.0205404	0.0477718	0.667218	0.922202
FBgn0000241	bw	1.24475	-0.579321	0.970004	0.55035	0.882149
FBgn0000244	by	9.42106	-0.0841038	0.0796757	0.291162	0.738478
FBgn0000246	c(3)G	7.73981	-0.228488	0.132594	0.0848493	0.443115
FBgn0000247	ca	10.7604	0.0204512	0.0761643	0.788303	0.953211
FBgn0000250	cact	11.4746	0.0117953	0.0398042	0.766976	0.949174
FBgn0000251	cad	-0.71345	0	5.20139	1	NA
FBgn0000253	Cam	12.9728	-0.0240138	0.0415755	0.563537	0.886861
FBgn0000256	capu	11.572	-0.0849565	0.0560671	0.129705	0.532921
FBgn0000257	car	8.62548	-0.085458	0.0843137	0.310787	0.752872
FBgn0000259	CkIIbeta	12.0628	0.039181	0.0460457	0.394817	0.808917
FBgn0000261	Cat	14.4223	-0.0955931	0.0825748	0.247005	0.695003
FBgn0000273	Pka-C1	11.7879	-0.0453777	0.0591324	0.442849	0.833667
FBgn0000274	Pka-C2	-1.15364	-2.76113	2.96045	0.350989	NA
FBgn0000276	CecA1	1.14654	-1.18515	1.31653	0.368012	0.792214
FBgn0000278	CecB	1.70979	-1.00536	1.0817	0.35267	0.782087
FBgn0000279	CecC	3.66308	-0.240669	0.637504	0.70579	0.935237
FBgn0000283	Cp190	11.7826	0.0149244	0.0417138	0.720507	0.939908
FBgn0000286	Cf2	9.72523	0.0352053	0.0773327	0.648933	0.918409
FBgn0000287	salr	11.4695	0.11108	0.0747615	0.137336	0.544358
FBgn0000289	cg	12.6543	-0.0116867	0.0485944	0.809947	0.961228
FBgn0000299	Col4a1	9.15957	0.235585	0.125078	0.0596326	0.369746
FBgn0000303	ChAT	3.6283	0.53569	0.476549	0.26097	0.711773
FBgn0000307	chif	11.5949	0.0622126	0.0647277	0.33648	0.773263
FBgn0000308	chic	13.9023	-0.050922	0.0562604	0.365405	0.790187
FBgn0000316	cin	10.281	-0.0716349	0.0532282	0.178364	0.611701
FBgn0000317	ck	12.342	-0.162213	0.0827239	0.0498917	0.338548
FBgn0000318	cl	10.4457	-0.16939	0.0630064	0.00717815	0.0998902
FBgn0000319	Chc	13.9697	-0.0324994	0.0478079	0.496637	0.857244
FBgn0000320	eya	7.39789	-0.380433	0.537365	0.478971	0.852181
FBgn0000326	clt	8.36988	-0.118183	0.0838117	0.15851	0.58141
FBgn0000330	cm	9.82435	-0.0589675	0.0660786	0.372187	0.796409
FBgn0000337	cn	2.42145	1.06045	1.11654	0.342236	0.776063
FBgn0000339	cni	9.03776	0.0523623	0.0941978	0.578296	0.892497
FBgn0000346	comt	8.34367	0.220884	0.0942383	0.0190841	0.192679
FBgn0000351	cort	4.24456	-0.152723	0.355985	0.667913	0.922471
FBgn0000352	cos	10.7215	0.115776	0.0664784	0.0815863	0.434665
FBgn0000357	Cp18	1.95431	0.160575	0.813522	0.843529	0.967521
FBgn0000370	crc	12.804	0.321026	0.0535096	1.98043e-09	1.95978e-07
FBgn0000376	crm	9.25202	0.100485	0.089257	0.26025	0.711773
FBgn0000377	crn	9.81728	0.0529055	0.0585089	0.365874	0.790462
FBgn0000382	csw	11.1453	-0.00730112	0.0518728	0.888067	0.975581
FBgn0000384	cta	10.5397	0.0757131	0.0546289	0.165761	0.593836
FBgn0000394	cv	11.0636	0.0200877	0.0460364	0.662587	0.921218
FBgn0000395	cv-2	11.4286	-0.358767	0.0652517	3.837e-08	2.98153e-06
FBgn0000404	CycA	11.347	0.0798046	0.0800704	0.318919	0.759451
FBgn0000405	CycB	10.2052	-0.0768273	0.10059	0.445006	0.834783
FBgn0000406	Cyt-b5-r	0.317508	-0.518104	1.24935	0.678362	0.925256
FBgn0000411	D	2.42372	0.254252	1.10206	0.817543	0.961986
FBgn0000412	D1	13.0508	0.0542414	0.0391449	0.165852	0.593836
FBgn0000414	Dab	11.5715	0.0295201	0.0863463	0.73244	0.943083
FBgn0000416	Sap-r	13.3279	0.0114246	0.044475	0.797274	0.956563
FBgn0000422	Ddc	4.67178	1.02662	0.344239	0.00286107	0.0502662
FBgn0000426	SmF	9.26277	0.0119027	0.089737	0.894478	0.977086
FBgn0000427	2024-12-01	-0.576897	3.28808	2.01325	0.102422	NA
FBgn0000439	Dfd	2.39605	-1.66091	1.82829	0.363639	0.78926
FBgn0000442	Pkg21D	4.38897	-0.0513945	0.282657	0.855719	0.969949
FBgn0000447	Dhod	9.84141	-0.0066389	0.090023	0.941212	0.987601
FBgn0000448	Hr3	3.33486	-1.93735	0.896197	0.0306378	0.256066
FBgn0000449	dib	2.54618	0.5242	0.571848	0.359312	0.786827
FBgn0000451	ect	10.3316	-0.112169	0.0863677	0.194034	0.631401
FBgn0000454	Dip-B	11.0927	-0.140221	0.101757	0.168204	0.598117
FBgn0000455	Dip-C	9.25193	0.154037	0.0709355	0.0298929	0.253182
FBgn0000459	disco	7.75386	-0.0127142	0.174577	0.941943	0.987601
FBgn0000463	Dl	11.8963	0.0582776	0.0626724	0.352435	0.782087
FBgn0000464	Lar	8.30454	-0.189428	0.10773	0.0786862	0.426911
FBgn0000473	Cyp6a2	3.48955	1.0046	0.525224	0.0557847	0.359686
FBgn0000477	DNaseII	3.33432	-0.869337	0.705954	0.21816	0.662364
FBgn0000479	dnc	10.6515	-0.0859032	0.0756901	0.256403	0.706819
FBgn0000482	dor	9.57111	-0.0134194	0.0626637	0.83043	0.96516
FBgn0000489	Pka-C3	9.58675	0.0855023	0.0693732	0.217763	0.662026
FBgn0000490	dpp	10.8529	0.152774	0.0492249	0.00191187	0.0372654
FBgn0000492	Dr	11.2172	-0.0121877	0.0744063	0.86989	0.973288
FBgn0000499	dsh	10.5849	-0.0279581	0.059509	0.638489	0.915681
FBgn0000500	Dsk	4.80516	-0.487845	0.480353	0.309821	0.752646
FBgn0000504	dsx	10.1757	0.113061	0.0759323	0.136497	0.542705
FBgn0000520	dwg	8.98962	-0.156332	0.0736025	0.0336697	0.268217
FBgn0000524	dx	11.7028	-0.0138378	0.0597433	0.816833	0.961986
FBgn0000527	e	9.1318	-0.627545	0.462372	0.174708	0.60671
FBgn0000533	ea	7.24525	-0.0978814	0.133827	0.464534	0.844086
FBgn0000535	eag	2.78807	-0.0250866	0.634085	0.968441	0.993674
FBgn0000536	eas	10.828	0.0216338	0.0686853	0.752784	0.947186
FBgn0000541	E(bx)	12.9691	0.0289709	0.0852323	0.733928	0.943488
FBgn0000542	ec	13.4925	0.0861237	0.09352	0.357097	0.785758
FBgn0000543	ecd	10.2205	0.0432555	0.0651065	0.506446	0.861539
FBgn0000546	EcR	12.0346	0.393476	0.12877	0.00224577	0.0420859
FBgn0000547	ed	15.1391	0.0031273	0.0800562	0.968839	0.993874
FBgn0000551	Edg78E	3.47	-0.0533667	0.446423	0.904845	0.97931
FBgn0000552	Edg84A	0.314124	1.44663	1.67526	0.38785	0.80794
FBgn0000557	eEF1alpha2	10.3515	-0.262915	0.276525	0.341715	0.776063
FBgn0000559	eEF2	16.3481	0.00482699	0.0333587	0.884948	0.975573
FBgn0000560	eg	8.81385	-0.112306	0.112594	0.318549	0.759377
FBgn0000562	egl	11.5388	0.0332577	0.0428038	0.437169	0.830609
FBgn0000565	MsrA	9.76304	0.245716	0.077783	0.00158315	0.0322707
FBgn0000566	Eip55E	9.1253	0.0405344	0.0776994	0.601892	0.90139
FBgn0000567	Eip74EF	12.5106	-0.142606	0.0804387	0.0762532	0.420234
FBgn0000568	Eip75B	13.3888	0.0829549	0.0796144	0.297431	0.74306
FBgn0000575	emc	12.8152	-0.143001	0.0655955	0.0292547	0.249435
FBgn0000576	ems	9.83863	-0.132635	0.0816865	0.104439	0.48156
FBgn0000577	en	10.866	0.23789	0.0754616	0.00161897	0.0326559
FBgn0000578	ena	13.7215	0.169013	0.0925295	0.0677623	0.393931
FBgn0000579	Eno	11.975	-0.107525	0.0513294	0.0361875	0.281999
FBgn0000581	E(Pc)	12.0255	-0.00446543	0.0892106	0.960079	0.991507
FBgn0000588	esc	5.911	-0.0205327	0.197076	0.917021	0.982269
FBgn0000591	E(spl)m8-HLH	3.06527	-0.757745	0.705592	0.282861	0.731314
FBgn0000592	Est-6	-1.12392	-1.71018	2.57696	0.506918	NA
FBgn0000594	Est-P	1.65952	0.614504	0.925925	0.506905	0.861558
FBgn0000611	exd	12.7296	0.0243595	0.0327869	0.457503	0.841377
FBgn0000615	exu	3.65731	-0.0733554	0.389809	0.850733	0.968625
FBgn0000617	e(y)1	8.81452	-0.0832614	0.0727037	0.25212	0.700685
FBgn0000618	e(y)2	8.0746	-0.0309194	0.0910099	0.734055	0.943488
FBgn0000625	eyg	7.64775	-0.269029	0.130396	0.0390963	0.295854
FBgn0000629	E(z)	9.51567	0.0065759	0.0549959	0.904823	0.97931
FBgn0000633	CG17716	4.57421	0.17571	0.372706	0.637323	0.915498
FBgn0000635	Fas2	12.968	-0.0383485	0.0575411	0.50512	0.860548
FBgn0000636	Fas3	13.7145	0.0897614	0.0667594	0.178771	0.61255
FBgn0000639	Fbp1	9.9102	0.49078	0.319413	0.124414	0.522476
FBgn0000640	Fbp2	8.85226	0.388076	0.361387	0.282889	0.731314
FBgn0000644	Fcp3C	6.89803	-0.313415	0.155571	0.0439452	0.315827
FBgn0000658	fj	12.1012	0.137368	0.0851379	0.10664	0.486109
FBgn0000659	fkh	4.52113	-0.46949	0.518986	0.365662	0.790299
FBgn0000662	fl(2)d	11.4801	0.030058	0.0403439	0.456246	0.840618
FBgn0000667	Actn	11.8703	-0.399836	0.0837905	1.82534e-06	0.000101605
FBgn0000709	fliI	10.3864	0.159855	0.0616487	0.00951421	0.122184
FBgn0000711	flw	11.2094	0.00962878	0.0471075	0.838041	0.966496
FBgn0000715	FMRFa	-0.0206684	-0.211461	1.64712	0.897846	0.978288
FBgn0000719	fog	9.85734	-0.264911	0.116322	0.0227624	0.214437
FBgn0000721	for	11.2565	-0.00213148	0.0558914	0.969579	0.993883
FBgn0000723	FER	11.6058	0.24781	0.0838911	0.00313736	0.0541252
FBgn0000808	gd	4.62422	2.69739	0.301261	3.43892e-19	1.37296e-16
FBgn0000810	fs(1)K10	9.72818	-0.0252632	0.0750443	0.736385	0.944298
FBgn0000826	png	3.43294	0.765046	0.525621	0.145529	0.555241
FBgn0000927	fs(1)Ya	3.05768	-1.09913	0.656993	0.0943326	0.462322
FBgn0000928	fs(1)Yb	2.66202	-0.228875	0.746814	0.759248	0.947766
FBgn0000964	tj	-1.17155	0.054323	3.04225	0.985754	NA
FBgn0000996	dup	8.1158	0.106239	0.0983051	0.279826	0.728982
FBgn0001075	ft	13.5997	0.0312997	0.131302	0.811586	0.96149
FBgn0001078	ftz-f1	5.43518	0.33212	0.258568	0.198981	0.636234
FBgn0001079	fu	9.22137	0.102539	0.0784008	0.190915	0.627675
FBgn0001083	fw	10.621	0.00130963	0.0530655	0.980311	0.996579
FBgn0001084	fy	9.64702	0.0426547	0.055802	0.444633	0.834489
FBgn0001085	fz	11.7656	0.07843	0.0417964	0.0605899	0.372912
FBgn0001086	fzy	8.26474	-0.0297891	0.101449	0.769035	0.949174
FBgn0001087	g	11.1889	-0.0065212	0.0484579	0.892948	0.977042
FBgn0001089	Gal	10.236	0.134453	0.104155	0.196739	0.634708
FBgn0001090	bnb	19.9999	0.170929	0.0996249	0.0862122	0.444153
FBgn0001091	Gapdh1	10.8755	0.0748349	0.083043	0.367504	0.792197
FBgn0001092	Gapdh2	10.4133	-0.00881148	0.0726238	0.903429	0.97931
FBgn0001098	Gdh	11.386	0.0724927	0.0716886	0.311912	0.754087
FBgn0001099	gdl	3.62216	0.591307	0.392052	0.131494	0.534637
FBgn0001104	Galphai	11.9923	-0.079216	0.0451816	0.0795537	0.430157
FBgn0001105	Gbeta13F	13.207	-0.0649806	0.0430533	0.13122	0.534637
FBgn0001108	DCTN1-p150	11.2939	-0.0668384	0.0557722	0.230754	0.67817
FBgn0001112	Gld	9.56893	-0.616968	0.307601	0.0448839	0.317627
FBgn0001114	Glt	11.5284	0.129939	0.0847136	0.125063	0.523492
FBgn0001122	Galphao	11.0028	0.0664184	0.0525923	0.206628	0.64402
FBgn0001123	Galphas	11.6311	-0.089017	0.046991	0.0581798	0.365693
FBgn0001124	Got1	10.7553	0.0371262	0.0500486	0.458206	0.841377
FBgn0001125	Got2	9.38593	0.35592	0.0802212	9.13346e-06	0.000438785
FBgn0001128	Gpdh1	8.79117	0.109213	0.0798752	0.171533	0.602592
FBgn0001133	grau	8.89859	-0.0391741	0.0771153	0.611458	0.906329
FBgn0001134	Grd	1.35944	1.02818	0.885779	0.245739	0.693344
FBgn0001137	grk	4.05664	-0.0915212	0.352636	0.795223	0.955631
FBgn0001138	grn	11.0118	-0.174511	0.181109	0.335263	0.772267
FBgn0001139	gro	12.3059	0.0104292	0.0571562	0.855215	0.969947
FBgn0001142	Gs1	8.42526	-0.268661	0.144799	0.0635382	0.382003
FBgn0001145	Gs2	5.29685	-0.321823	0.291307	0.269266	0.719663
FBgn0001147	gsb-n	3.09773	-0.183496	0.672614	0.784999	0.952032
FBgn0001148	gsb	3.47538	-0.146964	0.66466	0.825005	0.963768
FBgn0001149	GstD1	13.6367	-0.0266123	0.0833687	0.749566	0.947018
FBgn0001150	gt	5.85872	0.355794	0.271885	0.190663	0.627675
FBgn0001168	h	8.42008	0.0433283	0.152886	0.776869	0.950783
FBgn0001169	H	11.6031	-0.00560963	0.0516743	0.913553	0.981677
FBgn0001170	H2.0	4.9923	-0.412071	0.929928	0.657677	0.920647
FBgn0001179	hay	9.10806	0.111798	0.081951	0.172502	0.602709
FBgn0001180	hb	2.04173	-0.940141	0.877353	0.283915	0.731528
FBgn0001185	her	9.28423	-0.0535001	0.0649191	0.409881	0.819363
FBgn0001186	Hex-A	10.845	-0.167717	0.0602649	0.00538584	0.0805649
FBgn0001187	Hex-C	1.91716	1.55815	0.738009	0.0347474	0.27459
FBgn0001189	hfw	10.3171	-0.291672	0.0542749	7.70214e-08	5.64401e-06
FBgn0001197	His2Av	11.4416	-0.0229557	0.0625764	0.713736	0.937835
FBgn0001202	hook	10.1476	0.0467465	0.0544835	0.390896	0.80857
FBgn0001206	Hmr	9.28928	-0.0543704	0.0880229	0.536783	0.875838
FBgn0001208	Hn	4.66574	-0.273033	0.358405	0.44618	0.835631
FBgn0001215	Hrb98DE	13.3773	-0.0928743	0.0436676	0.0334326	0.267692
FBgn0001216	Hsc70-1	1.78505	0.40556	0.997223	0.684236	0.927212
FBgn0001217	Hsc70-2	8.37894	0.273502	0.384121	0.476452	0.850241
FBgn0001218	Hsc70-3	15.1601	-0.0465326	0.066711	0.485474	0.852649
FBgn0001220	Hsc70-5	11.0821	-0.0750097	0.0616754	0.223908	0.670901
FBgn0001222	Hsf	10.9675	-0.038472	0.0365449	0.292464	0.73958
FBgn0001224	Hsp23	14.8522	0.179526	0.0988293	0.0692901	0.399721
FBgn0001225	Hsp26	12.6457	-0.180755	0.101578	0.0751625	0.416994
FBgn0001226	Hsp27	15.9065	-0.0198954	0.0455201	0.662061	0.921218
FBgn0001227	Hsp67Ba	13.704	-0.110856	0.0414769	0.00752413	0.103831
FBgn0001228	CG4456	3.08242	1.0163	0.516961	0.0493094	0.336853
FBgn0001229	Hsp67Bc	7.82269	-0.239474	0.130484	0.0664655	0.390232
FBgn0001230	Hsp68	7.31233	-0.130435	0.162553	0.422313	0.826416
FBgn0001233	Hsp83	13.5476	-0.315132	0.247887	0.203631	0.641533
FBgn0001234	lncRNA:Hsromega	11.2982	-0.102607	0.117871	0.384024	0.805715
FBgn0001235	hth	13.1989	-0.133066	0.100527	0.185609	0.62104
FBgn0001247	Ide	10.6983	-0.0345976	0.0511782	0.499027	0.858122
FBgn0001248	Idh	13.0053	0.0543556	0.0368903	0.140632	0.548037
FBgn0001250	if	11.9477	0.226302	0.0914301	0.0133184	0.152323
FBgn0001253	ImpE1	11.8393	-0.697748	0.267753	0.00916233	0.119131
FBgn0001254	ImpE2	18.1681	0.103506	0.0517241	0.045379	0.319391
FBgn0001255	ImpE3	6.24433	0.0411706	0.188286	0.826915	0.963877
FBgn0001256	ImpL1	11.3205	-0.463681	0.113872	4.66204e-05	0.00184222
FBgn0001257	ImpL2	10.2661	-0.186369	0.114035	0.102194	0.475741
FBgn0001258	Ldh	8.85208	-0.235732	0.171506	0.16929	0.599377
FBgn0001259	in	10.4651	0.00624258	0.0601174	0.917296	0.982269
FBgn0001263	inaD	4.40046	0.338013	0.324652	0.297804	0.743417
FBgn0001269	inv	10.999	0.147816	0.0618018	0.0167675	0.177292
FBgn0001276	ix	8.55736	-0.0461487	0.0855254	0.589479	0.896139
FBgn0001280	janA	9.63825	-0.020423	0.0737421	0.781817	0.951491
FBgn0001281	janB	-0.343532	-0.888032	1.60562	0.58021	NA
FBgn0001291	Jra	10.1803	0.0104488	0.0657213	0.87368	0.974909
FBgn0001296	kar	9.1226	0.322107	0.103002	0.00176477	0.0352284
FBgn0001297	kay	10.1638	0.056613	0.0769442	0.461872	0.842131
FBgn0001301	kel	11.0104	0.0974964	0.0613972	0.112295	0.496276
FBgn0001308	Khc	12.5318	-0.0250409	0.0398871	0.530139	0.87236
FBgn0001311	kkv	13.3759	0.0108181	0.0625838	0.862763	0.971973
FBgn0001316	klar	14.2986	0.0507907	0.0840626	0.54571	0.880461
FBgn0001319	kn	11.4276	0.131055	0.0814348	0.107545	0.48824
FBgn0001320	kni	8.77666	-0.149051	0.189862	0.432424	0.82905
FBgn0001321	knk	9.96999	0.279042	0.136746	0.0412914	0.305777
FBgn0001323	knrl	8.8131	-0.209507	0.189189	0.268124	0.718265
FBgn0001324	kto	11.52	-0.00740644	0.0953392	0.938078	0.987432
FBgn0001325	Kr	-0.35767	2.07475	1.67487	0.215436	NA
FBgn0001330	kz	8.02947	0.0945947	0.0994542	0.341534	0.776063
FBgn0001341	Mybbp1A	8.57864	0.0377014	0.0802394	0.638454	0.915681
FBgn0001404	egh	9.91795	-0.0544808	0.0688311	0.428644	0.828244
FBgn0001491	l(1)10Bb	8.84766	0.0816473	0.0811287	0.314227	0.756656
FBgn0001565	Hlc	9.94796	0.140046	0.0496491	0.00479151	0.0737714
FBgn0001612	Grip91	8.60781	0.0457515	0.0826769	0.580005	0.893103
FBgn0001624	dlg1	12.2073	-0.0309857	0.0563529	0.582422	0.893164
FBgn0001941	ifc	8.53723	0.117511	0.084451	0.164083	0.590419
FBgn0001942	eIF4A	15.4134	0.0614719	0.0437485	0.159986	0.583237
FBgn0001961	Arpc1	10.6377	-0.0565145	0.0416895	0.175225	0.607658
FBgn0001965	Sos	11.0487	-0.0792951	0.0761808	0.297931	0.743576
FBgn0001967	NimC3	8.3325	0.249813	0.108081	0.0208133	0.204304
FBgn0001970	Pgant35A	10.2274	-0.0379758	0.0579281	0.512102	0.864095
FBgn0001977	CIAPIN1	10.4042	-0.342175	0.0548566	4.44268e-10	4.85258e-08
FBgn0001978	stc	10.7189	-0.00142795	0.0446721	0.9745	0.994338
FBgn0001981	esg	9.78323	-0.192586	0.160343	0.229717	0.67817
FBgn0001983	wor	1.84637	-0.593198	0.694651	0.393132	0.80857
FBgn0001986	Mtr4	9.40342	0.0831917	0.0656403	0.205017	0.642444
FBgn0001987	Gli	12.5	0.0402914	0.0560196	0.471995	0.847825
FBgn0001989	ND-B17	9.70706	-0.0359328	0.0867871	0.67885	0.9254
FBgn0001990	wek	8.24787	0.108426	0.0892649	0.224499	0.671147
FBgn0001991	Ca-alpha1D	4.46584	-0.450673	0.484843	0.352618	0.782087
FBgn0001992	Cyp303a1	3.60906	-0.0860407	0.409205	0.833462	0.966265
FBgn0001994	crp	12.4836	0.08564	0.0587067	0.144626	0.554001
FBgn0001995	mRpL4	8.14797	-0.317849	0.0899919	0.000412468	0.011423
FBgn0002021	l(2)37Bb	8.02682	-0.150418	0.0964372	0.118818	0.509887
FBgn0002022	Catsup	10.8398	-0.0601996	0.0611519	0.324905	0.764428
FBgn0002023	Lim3	0.606245	-0.590741	1.3136	0.652918	0.91952
FBgn0002031	l(2)37Cc	10.7511	0.220772	0.0567981	0.000101508	0.00353994
FBgn0002036	CG10561	6.9961	0.262543	0.123929	0.034133	0.27105
FBgn0002044	swm	11.3941	0.036495	0.0611519	0.550645	0.882149
FBgn0002069	AspRS	11.6292	0.00698327	0.0360642	0.846462	0.967723
FBgn0002121	l(2)gl	12.5784	-0.0194882	0.0490402	0.691079	0.930033
FBgn0002174	CG5504	9.02718	0.75554	0.0914536	1.439e-16	3.54485e-14
FBgn0002183	dre4	11.268	0.00588294	0.0710837	0.934042	0.985433
FBgn0002283	l(3)73Ah	9.24415	0.0176081	0.0755185	0.815635	0.961986
FBgn0002284	Prosbeta6	10.5785	0.0130141	0.06137	0.832061	0.965932
FBgn0002306	sas	13.1879	-0.00711273	0.0759945	0.925431	0.983277
FBgn0002354	l(3)87Df	5.81473	-0.259666	0.199274	0.192555	0.629413
FBgn0002413	dco	12.3814	-0.0215476	0.0420763	0.608576	0.904853
FBgn0002431	hyd	12.8054	-0.00846674	0.0826743	0.918431	0.98247
FBgn0002441	l(3)mbt	10.1888	0.025292	0.0597275	0.671962	0.923738
FBgn0002466	sti	8.25886	-0.143116	0.204378	0.48377	0.852291
FBgn0002521	pho	11.0528	0.0966766	0.0613102	0.114832	0.50157
FBgn0002522	lab	0.838568	-0.979382	1.75296	0.576364	0.89158
FBgn0002524	lace	9.0855	-0.00392498	0.0653058	0.952075	0.989589
FBgn0002525	Lam	13.1653	0.0467567	0.0567518	0.410008	0.819363
FBgn0002526	LanA	11.6879	0.0411398	0.0963199	0.669295	0.922663
FBgn0002531	Lcp1	-0.301181	-2.06627	1.61028	0.199431	0.637144
FBgn0002535	Lcp4	0.829045	-0.357372	1.04772	0.733032	0.943094
FBgn0002542	lds	9.82748	0.243404	0.0765272	0.0014696	0.0309365
FBgn0002543	robo2	12.8377	0.0178197	0.0866031	0.836976	0.966496
FBgn0002552	lin	10.3566	0.105218	0.0620339	0.0898604	0.450586
FBgn0002561	l(1)sc	-0.22656	-0.0293616	1.4702	0.984066	0.997161
FBgn0002562	Lsp1alpha	6.23273	0.387924	0.366509	0.289859	0.737186
FBgn0002563	Lsp1beta	7.51486	0.129175	0.376083	0.731241	0.94287
FBgn0002564	Lsp1gamma	7.27734	0.939498	0.368334	0.0107517	0.13328
FBgn0002565	Lsp2	9.89094	-0.078486	0.380731	0.836677	0.966496
FBgn0002566	lt	11.0141	0.0272406	0.0470015	0.562206	0.88652
FBgn0002567	Rab32	7.06536	-0.483905	0.226608	0.0327256	0.264869
FBgn0002573	sens	5.55531	-0.175278	0.335898	0.601797	0.90139
FBgn0002576	lz	1.77052	1.74799	2.15014	0.416238	0.824359
FBgn0002577	m	11.5059	-0.700779	0.543012	0.196863	0.634721
FBgn0002578	Kaz-m1	0.102806	0.652324	1.73555	0.707021	0.93561
FBgn0002579	RpL36	14.1438	0.0639906	0.0649197	0.324285	0.764428
FBgn0002590	RpS5a	14.8977	-0.00225975	0.0558968	0.967753	0.993542
FBgn0002592	E(spl)m2-BFM	8.94231	-0.0657467	0.0943747	0.486018	0.852649
FBgn0002593	RpLP1	14.5458	0.156812	0.0686194	0.0222987	0.211619
FBgn0002609	E(spl)m3-HLH	9.81089	-0.122782	0.0712878	0.0850066	0.44325
FBgn0002622	RpS3	14.6587	0.0902862	0.059657	0.130172	0.533221
FBgn0002626	RpL32	14.1437	0.094644	0.0820832	0.2489	0.69636
FBgn0002629	E(spl)m4-BFM	1.73993	0.735579	1.01317	0.467829	0.845012
FBgn0002631	E(spl)m5-HLH	2.45468	-0.742353	0.802328	0.354837	0.784328
FBgn0002632	E(spl)m6-BFM	4.56747	0.0582313	0.451335	0.897342	0.978104
FBgn0002633	E(spl)m7-HLH	8.2491	0.049299	0.105616	0.64066	0.915749
FBgn0002638	Rcc1	9.32559	-0.0823742	0.0733457	0.261397	0.711773
FBgn0002641	mal	7.9622	0.12273	0.0897682	0.171567	0.602592
FBgn0002643	mam	13.0205	-0.0162367	0.0859347	0.850138	0.96851
FBgn0002645	Map205	12.9986	-0.0858578	0.071327	0.228697	0.676997
FBgn0002673	twe	3.82457	0.229834	0.37875	0.543968	0.880189
FBgn0002707	mei-9	8.57586	-0.0124363	0.0878544	0.887431	0.975581
FBgn0002709	mei-218	4.83133	0.718753	0.348536	0.0391884	0.296164
FBgn0002715	mei-S332	7.47769	0.0864084	0.115322	0.453691	0.839378
FBgn0002716	mei-W68	3.97631	-0.229783	0.329087	0.485025	0.852649
FBgn0002719	Men	9.92781	0.227712	0.129315	0.0782547	0.425753
FBgn0002723	Met	9.46859	0.0599033	0.0811419	0.46036	0.841944
FBgn0002732	E(spl)malpha-BFM	8.21166	0.165823	0.11008	0.131968	0.534989
FBgn0002733	E(spl)mbeta-HLH	11.1219	0.0401907	0.0686983	0.558527	0.885285
FBgn0002734	E(spl)mdelta-HLH	8.29636	-0.000187478	0.118452	0.998737	0.999616
FBgn0002735	E(spl)mgamma-HLH	4.55826	0.224266	0.317165	0.479508	0.852181
FBgn0002736	mago	9.50367	-0.00661411	0.0657911	0.919922	0.982634
FBgn0002772	Mlc1	5.33029	-1.65768	0.957685	0.0834651	0.439351
FBgn0002773	Mlc2	7.06081	-0.816368	0.78902	0.300828	0.745245
FBgn0002774	mle	11.7368	0.0403584	0.0444953	0.364392	0.78926
FBgn0002775	msl-3	8.71492	-0.0209993	0.0715626	0.769186	0.949174
FBgn0002778	mnd	8.69982	0.173236	0.0811702	0.0328236	0.265386
FBgn0002780	mod	12.0049	-0.0526976	0.0578222	0.362099	0.788487
FBgn0002781	mod(mdg4)	12.8456	0.0585643	0.0354516	0.0985444	0.467218
FBgn0002783	mor	12.3734	0.0465139	0.0662603	0.482687	0.852291
FBgn0002787	Rpn8	11.0603	-0.0260642	0.0431854	0.546148	0.880461
FBgn0002789	Mp20	0.0729325	-1.9263	1.82009	0.289895	0.737186
FBgn0002791	mr	9.37153	0.0759362	0.0626977	0.225839	0.67317
FBgn0002862	Mst87F	0.120662	-0.301065	1.49098	0.839976	0.966496
FBgn0002863	Acp95EF	2.38048	0.281507	0.638546	0.659317	0.920816
FBgn0002868	MtnA	4.46053	-1.20231	0.637231	0.0591905	0.36877
FBgn0002869	MtnB	0.750489	-0.655831	3.48636	0.850788	0.968625
FBgn0002872	mu2	8.6452	0.0169101	0.0925969	0.855096	0.969947
FBgn0002873	mud	8.89316	0.145993	0.171422	0.394405	0.808595
FBgn0002878	mus101	7.85964	0.124808	0.102764	0.224549	0.671147
FBgn0002887	mus201	8.3492	-0.612273	0.107624	1.27779e-08	1.04924e-06
FBgn0002891	DNApol-zeta	7.08249	-0.142712	0.198453	0.472067	0.847825
FBgn0002899	mus301	6.86927	0.0967337	0.146142	0.508024	0.862449
FBgn0002901	mus304	7.41344	-0.0379289	0.118747	0.749416	0.947018
FBgn0002905	DNApol-theta	7.97097	0.0671548	0.125083	0.59135	0.896862
FBgn0002906	Blm	9.27425	0.0152627	0.119791	0.898615	0.978314
FBgn0002917	na	6.20609	-0.129793	0.187695	0.489245	0.854114
FBgn0002921	Atpalpha	13.9129	-0.0424417	0.0574232	0.459845	0.841944
FBgn0002922	nau	2.00465	-0.282193	1.12336	0.801657	0.958643
FBgn0002924	ncd	8.34394	-0.0452147	0.109181	0.678781	0.9254
FBgn0002930	nec	7.93488	0.109117	0.15136	0.470965	0.847203
FBgn0002931	net	8.46232	0.0533248	0.128048	0.677084	0.924586
FBgn0002932	neur	10.1584	-0.0801911	0.0802689	0.31778	0.759235
FBgn0002936	ninaA	0.587421	0.614576	1.08667	0.571695	0.889335
FBgn0002937	ninaB	-0.881256	1.54785	2.31767	0.504231	NA
FBgn0002938	ninaC	4.85192	0.909925	0.404357	0.0244297	0.223418
FBgn0002939	ninaD	5.94904	-5.39451	0.557301	3.67709e-22	1.93515e-19
FBgn0002940	ninaE	-1.31673	1.98879	2.5892	0.442421	NA
FBgn0002941	slou	1.05754	-0.204684	1.76975	0.907924	0.980327
FBgn0002945	nkd	12.5795	-0.0506578	0.0653113	0.437964	0.830807
FBgn0002948	nod	7.97945	0.0479572	0.0926953	0.604902	0.902874
FBgn0002962	nos	2.15685	-0.30451	0.876321	0.728225	0.942358
FBgn0002973	numb	13.0136	0.0353516	0.0413058	0.39208	0.80857
FBgn0002985	odd	6.31875	-0.500333	0.509924	0.326499	0.766465
FBgn0002989	okr	7.12302	0.124363	0.129038	0.335161	0.772267
FBgn0003002	opa	8.8641	-0.125988	0.115064	0.273542	0.723894
FBgn0003008	or	8.78615	-0.0274825	0.084583	0.745243	0.946294
FBgn0003016	osp	11.713	0.0784088	0.0955472	0.411858	0.820879
FBgn0003023	otu	2.51156	1.09575	0.65716	0.0954334	0.463592
FBgn0003028	ovo	13.307	-0.127451	0.0898765	0.156169	0.578331
FBgn0003041	pbl	8.65548	-0.251386	0.114868	0.0286348	0.246311
FBgn0003042	Pc	9.14658	-0.047236	0.0706013	0.503462	0.859713
FBgn0003044	Pcl	10.6527	0.0181076	0.0586664	0.757585	0.947425
FBgn0003046	Pcp	1.86236	1.00856	0.917163	0.271484	0.72243
FBgn0003048	pcx	11.3437	-0.0489521	0.105877	0.64383	0.917109
FBgn0003053	peb	8.32222	-0.112244	0.129061	0.384465	0.805715
FBgn0003062	Fib	9.72853	0.224386	0.0845348	0.00794575	0.108358
FBgn0003065	CG2150	8.3775	-0.463734	0.168587	0.00594666	0.0869324
FBgn0003068	per	4.51495	-0.188868	0.299444	0.528218	0.871307
FBgn0003071	Pfk	10.2174	0.20987	0.0921155	0.0227068	0.214088
FBgn0003074	Pgi	10.111	0.157234	0.0532642	0.00315755	0.054321
FBgn0003076	Pgm1	7.73374	-0.266456	0.141254	0.0592474	0.368799
FBgn0003079	Raf	10.1319	0.127412	0.0572491	0.0260429	0.232479
FBgn0003082	phr	5.70855	0.0204491	0.234948	0.930643	0.984736
FBgn0003087	pim	7.41734	0.350074	0.155079	0.0239836	0.221437
FBgn0003089	pip	9.98313	0.0780863	0.0973679	0.42257	0.826621
FBgn0003090	pk	12.4631	0.0902389	0.0611957	0.140321	0.54757
FBgn0003091	Pkc53E	4.59127	-0.342247	0.35491	0.334886	0.772267
FBgn0003093	Pkc98E	12.0509	-0.00178402	0.0754226	0.981129	0.99706
FBgn0003116	pn	6.20174	-0.0621126	0.178043	0.727192	0.942106
FBgn0003117	pnr	6.28232	-0.292834	0.200444	0.144037	0.553186
FBgn0003118	pnt	10.4197	-0.00845183	0.0631581	0.893545	0.977042
FBgn0003124	polo	10.7513	0.107025	0.128913	0.406418	0.816401
FBgn0003129	Poxm	3.07461	-0.682403	0.705043	0.3331	0.771864
FBgn0003130	Poxn	8.09014	0.111143	0.111304	0.318012	0.759365
FBgn0003134	Pp1alpha-96A	10.2679	0.0294208	0.0509854	0.56391	0.887094
FBgn0003137	Ppn	12.1043	0.113204	0.0961049	0.23883	0.687512
FBgn0003139	PpV	9.7383	0.0132357	0.0582579	0.820275	0.963004
FBgn0003141	pr	9.47784	-0.0445403	0.064685	0.491093	0.855352
FBgn0003145	prd	-1.44297	-3.42351	4.5975	0.456485	NA
FBgn0003149	Prm	4.75775	0.0264971	0.750106	0.971821	0.994338
FBgn0003159	CG2841	10.8299	0.143203	0.0880991	0.10406	0.480002
FBgn0003162	Pu	9.57433	-0.0116579	0.154432	0.939826	0.987601
FBgn0003165	pum	13.7195	-0.136612	0.0843364	0.105265	0.482677
FBgn0003169	put	11.7658	-0.020985	0.0382983	0.583736	0.8936
FBgn0003174	pwn	12.419	0.156701	0.0998776	0.116665	0.505569
FBgn0003175	px	10.6782	0.156441	0.0886819	0.077721	0.424811
FBgn0003187	qua	10.1949	-0.758405	0.299505	0.0113351	0.138
FBgn0003189	r	10.8406	0.063906	0.0622326	0.304473	0.748051
FBgn0003204	ras	10.5071	-0.0444782	0.0546009	0.415297	0.823482
FBgn0003205	Ras85D	12.1464	0.0640247	0.0364834	0.0792765	0.42951
FBgn0003206	Ras64B	10.549	0.0507099	0.0788686	0.520245	0.867425
FBgn0003209	raw	10.2436	-0.0454849	0.0604821	0.452027	0.839064
FBgn0003210	rb	11.158	-0.0739627	0.0411893	0.0725461	0.410327
FBgn0003218	rdgB	10.1288	-0.419864	0.0783976	8.52883e-08	6.13334e-06
FBgn0003227	rec	6.85265	0.212576	0.127496	0.0954535	0.463592
FBgn0003231	ref(2)P	11.5245	-0.313847	0.059	1.04087e-07	7.31744e-06
FBgn0003254	rib	4.29512	-0.0182978	0.335028	0.956445	0.990405
FBgn0003255	rk	2.91351	0.697412	0.522263	0.181757	0.618177
FBgn0003256	rl	10.7979	-0.0994549	0.0536471	0.063757	0.382674
FBgn0003257	r-l	8.42387	0.125097	0.084067	0.136734	0.543044
FBgn0003261	Rm62	14.934	0.104224	0.0232134	7.12821e-06	0.000343877
FBgn0003267	ro	-0.698728	-0.569761	2.84336	0.841181	NA
FBgn0003268	rod	9.106	0.157687	0.0936637	0.0922695	0.456967
FBgn0003274	RpLP2	14.557	0.0523554	0.0649282	0.420036	0.825526
FBgn0003275	RpII18	9.81599	-0.0624912	0.077077	0.417501	0.824996
FBgn0003277	RpII215	12.1761	0.0110927	0.0765103	0.884724	0.975573
FBgn0003278	RpI135	8.51816	0.0701416	0.077121	0.363086	0.78926
FBgn0003279	RpL4	15.3749	0.126566	0.0527781	0.0164812	0.175546
FBgn0003285	rst	11.2409	0.133904	0.0802121	0.0950433	0.463336
FBgn0003292	rt	10.5031	-0.0282758	0.182597	0.876937	0.975339
FBgn0003295	ru	6.64073	0.112242	0.154453	0.467405	0.844705
FBgn0003300	run	1.24993	0.980843	0.87442	0.261987	0.71211
FBgn0003301	rut	11.516	-0.0186227	0.0952645	0.845014	0.967521
FBgn0003302	rux	8.71302	-0.00751334	0.0818387	0.926852	0.983601
FBgn0003308	ry	6.45518	0.461191	0.410371	0.26108	0.711773
FBgn0003310	S	11.5381	0.119462	0.0683759	0.080613	0.432301
FBgn0003312	sad	4.77459	0.0144222	0.277047	0.958483	0.990921
FBgn0003317	sax	10.5982	-0.0429163	0.0473432	0.364674	0.78926
FBgn0003319	Sb	11.5517	-0.0341107	0.116552	0.769777	0.949174
FBgn0003321	sbr	11.1284	0.0460975	0.0373549	0.217187	0.660959
FBgn0003326	sca	8.23915	-0.186043	0.101004	0.0654846	0.386962
FBgn0003330	Sce	9.54296	0.12229	0.0660954	0.0642837	0.384441
FBgn0003334	Scm	10.3249	-0.00966562	0.0579614	0.867559	0.972843
FBgn0003339	Scr	7.0961	0.651357	0.812518	0.422754	0.826798
FBgn0003345	sd	13.5879	0.072358	0.0535436	0.176572	0.609556
FBgn0003346	RanGAP	9.02322	0.00491647	0.0943603	0.958447	0.990921
FBgn0003353	sei	8.61671	0.506159	0.0844006	2.00863e-09	1.97084e-07
FBgn0003360	sesB	13.3682	-0.0615551	0.0397056	0.121072	0.515548
FBgn0003366	sev	6.41702	-0.0413497	0.146624	0.777935	0.950886
FBgn0003371	sgg	12.2149	0.0709955	0.0869081	0.413983	0.822426
FBgn0003372	Sgs1	2.58754	0	5.20139	NA	NA
FBgn0003373	Sgs3	6.30362	-0.909415	3.10974	NA	NA
FBgn0003374	Sgs4	6.01508	15.4214	5.20139	NA	NA
FBgn0003375	Sgs5	6.30412	-13.6194	5.20139	NA	NA
FBgn0003377	Sgs7	7.85344	-0.461204	4.39738	NA	NA
FBgn0003378	Sgs8	6.23705	2.82079	3.18436	NA	NA
FBgn0003380	Sh	6.57718	-0.145212	0.202938	0.474271	0.848835
FBgn0003382	sha	11.8625	-0.738045	0.308359	0.0166903	0.17696
FBgn0003386	Shaw	5.48805	0.0455666	0.209315	0.827668	0.964107
FBgn0003388	shd	8.65389	-0.0801799	0.140358	0.567829	0.888541
FBgn0003390	shf	12.5301	0.0194015	0.0799356	0.808227	0.96086
FBgn0003391	shg	14.022	0.0499943	0.0710468	0.481631	0.852181
FBgn0003392	shi	11.7781	0.00704713	0.0468132	0.880341	0.975509
FBgn0003396	shn	11.403	0.111362	0.117185	0.341955	0.776063
FBgn0003401	shu	3.67561	0.189108	0.464995	0.684237	0.927212
FBgn0003410	sina	11.2474	0.0379877	0.0378088	0.315026	0.756777
FBgn0003415	skd	12.3794	-0.000890128	0.0968328	0.992666	0.998357
FBgn0003416	sl	9.68171	-0.0417358	0.0699577	0.550784	0.882149
FBgn0003423	slgA	10.1478	-0.278128	0.0861125	0.0012387	0.0270598
FBgn0003429	slo	4.345	0.319683	0.360872	0.375691	0.799075
FBgn0003430	slp1	5.38053	0.154382	0.269355	0.566541	0.887367
FBgn0003435	sm	11.0116	-0.11614	0.097666	0.234379	0.681954
FBgn0003444	smo	10.6282	0.0118781	0.0583246	0.838623	0.966496
FBgn0003447	sn	13.1891	-0.0746527	0.0683282	0.274586	0.724842
FBgn0003448	sna	1.82258	-0.302572	0.740988	0.683027	0.927212
FBgn0003449	snf	10.2252	-0.0848141	0.0574438	0.139818	0.546291
FBgn0003450	snk	-0.316391	0	2.13012	1	NA
FBgn0003459	stwl	8.97924	0.55116	0.089625	7.76679e-10	8.10125e-08
FBgn0003460	so	6.77848	-0.373123	0.623608	0.549621	0.882149
FBgn0003462	Sod1	12.0015	-0.0487597	0.0756255	0.519087	0.867153
FBgn0003463	sog	12.7284	-0.0795591	0.0663941	0.230806	0.67817
FBgn0003464	sol	11.4601	0.0528103	0.0521064	0.310817	0.752872
FBgn0003475	spir	12.2166	-0.117297	0.064906	0.0707334	0.4044
FBgn0003479	spn-A	8.05361	0.000568247	0.103222	0.995608	0.998967
FBgn0003480	spn-B	6.46206	0.565358	0.223128	0.0112836	0.137953
FBgn0003482	spn-D	3.10849	0.759884	0.642272	0.236762	0.684794
FBgn0003483	spn-E	4.06585	-0.438886	0.542699	0.418682	0.825045
FBgn0003486	spo	0.437613	-0.865674	1.16492	0.457411	0.841377
FBgn0003495	spz	8.01114	0.200151	0.107711	0.0631364	0.381167
FBgn0003499	sr	8.69812	-0.371465	0.36323	0.306463	0.748932
FBgn0003502	Btk29A	11.9131	-0.0280585	0.0442355	0.525887	0.870492
FBgn0003507	srp	8.27748	0.00319303	0.118402	0.978485	0.995453
FBgn0003512	Sry-delta	9.58462	-0.0389604	0.0821876	0.635469	0.915261
FBgn0003513	ss	8.85459	-0.334996	0.149985	0.0255138	0.229703
FBgn0003514	sqh	11.7154	-0.0425202	0.0382189	0.265905	0.716631
FBgn0003515	st	5.37996	0.435966	0.370734	0.239612	0.688289
FBgn0003517	sta	15.16	0.117989	0.0560771	0.0353746	0.277109
FBgn0003520	stau	12.0016	0.00358233	0.0598479	0.952269	0.989589
FBgn0003525	stg	13.7005	0.0716083	0.0653675	0.27331	0.723619
FBgn0003545	sub	5.12168	0.192066	0.348674	0.581738	0.893164
FBgn0003557	Su(dx)	10.9489	0.0148526	0.0483799	0.758843	0.947766
FBgn0003559	su(f)	10.5018	0.0171592	0.0503197	0.733101	0.943094
FBgn0003567	su(Hw)	11.5071	-0.0282551	0.0471571	0.54906	0.882062
FBgn0003575	su(sable)	11.2473	0.00776839	0.070412	0.91215	0.981482
FBgn0003598	Su(var)3-7	10.9299	-0.0355773	0.0620506	0.566402	0.887367
FBgn0003607	Su(var)205	11.811	-0.0105622	0.056322	0.851243	0.968714
FBgn0003612	Su(var)2-10	11.5358	-0.0494867	0.0443124	0.264094	0.714475
FBgn0003638	su(w[a])	12.5865	0.0049346	0.0595155	0.933921	0.985413
FBgn0003651	svp	8.95865	-0.369155	0.247261	0.135443	0.541033
FBgn0003654	sw	9.94414	0.0281311	0.0672427	0.67569	0.924549
FBgn0003655	swa	-0.306662	-1.27327	1.85887	0.493363	0.855936
FBgn0003656	sws	10.5653	0.014128	0.0785399	0.857244	0.970274
FBgn0003660	Syb	11.994	0.00472763	0.0445068	0.915406	0.98207
FBgn0003676	CCT1	11.5059	0.0356299	0.0483527	0.461198	0.841944
FBgn0003687	Tbp	8.56709	-0.0207581	0.0911276	0.819808	0.962771
FBgn0003701	thr	7.40497	0.205521	0.130966	0.116583	0.505543
FBgn0003710	tipE	6.46151	-0.680092	0.295846	0.0215163	0.208086
FBgn0003714	tko	9.01651	-0.0826832	0.0846341	0.328594	0.768734
FBgn0003716	tkv	14.8528	-0.0760605	0.0614353	0.215694	0.658298
FBgn0003719	tld	8.04952	-0.15504	0.119187	0.193324	0.631112
FBgn0003720	tll	-0.674725	-2.01657	1.79344	0.260835	NA
FBgn0003721	Tm1	13.5101	-0.0324277	0.0342696	0.34402	0.77681
FBgn0003731	Egfr	13.317	0.125255	0.0615005	0.0416847	0.307034
FBgn0003733	tor	1.80667	1.56409	0.974704	0.108564	0.490022
FBgn0003741	tra	8.67991	-0.0772205	0.0888067	0.384555	0.805715
FBgn0003742	tra2	9.61217	-0.0159846	0.0675255	0.812874	0.961825
FBgn0003744	trc	11.1496	-0.0447592	0.0373988	0.231382	0.679071
FBgn0003747	Gr5a	9.49781	-3.88337	1.13403	0.000616139	0.015644
FBgn0003748	Treh	9.84756	-0.378638	0.0781443	1.26373e-06	7.24332e-05
FBgn0003751	trk	1.16698	0.780374	1.01385	0.441471	0.833418
FBgn0003862	trx	12.9699	0.0126495	0.117408	0.914202	0.981786
FBgn0003865	tsg	-0.372147	-0.655897	2.13547	0.758733	NA
FBgn0003866	tsh	11.1227	-0.279634	0.252949	0.268945	0.719466
FBgn0003867	tsl	10.3724	-0.106478	0.0767366	0.165267	0.592955
FBgn0003870	ttk	13.553	0.116825	0.0590595	0.0479191	0.33126
FBgn0003882	tub	10.1173	-0.0290903	0.0525918	0.580172	0.893103
FBgn0003884	alphaTub84B	15.6052	-0.0691929	0.0555278	0.21273	0.653486
FBgn0003885	alphaTub84D	11.0258	0.0859098	0.0402332	0.0327369	0.264869
FBgn0003886	alphaTub85E	8.49113	-0.346783	0.407723	0.395026	0.80906
FBgn0003888	betaTub60D	12.7257	-0.10801	0.109524	0.324049	0.764428
FBgn0003889	betaTub85D	-1.07481	-1.28358	2.65055	0.628194	NA
FBgn0003890	betaTub97EF	9.80649	-0.082104	0.0750774	0.274134	0.724596
FBgn0003891	tud	13.6569	-0.159553	0.0771547	0.0386434	0.294157
FBgn0003892	ptc	11.1386	0.0476025	0.091087	0.60125	0.90139
FBgn0003896	tup	4.76667	0.155935	0.597552	0.794127	0.955494
FBgn0003900	twi	3.52958	0.073412	0.71051	0.917707	0.982269
FBgn0003922	snRNA:U2:38ABa	-0.86652	-1.40438	2.66511	0.598227	NA
FBgn0003930	snRNA:U4:39B	2.94651	0.387565	0.570162	0.496665	0.857244
FBgn0003941	RpL40	14.0302	0.053719	0.0776229	0.488906	0.854114
FBgn0003942	RpS27A	14.8839	0.0488518	0.0639437	0.444878	0.834783
FBgn0003943	Ubi-p63E	12.9399	-0.0344085	0.0792435	0.664135	0.921432
FBgn0003944	Ubx	6.80856	-0.46951	0.468894	0.316675	0.75769
FBgn0003950	unc	3.42828	-1.47792	0.635838	0.020106	0.199818
FBgn0003963	ush	10.165	-0.0697318	0.137107	0.611038	0.906186
FBgn0003964	usp	10.6147	0.0186366	0.0476165	0.69551	0.931045
FBgn0003965	v	0.171593	3.099	1.50818	0.0398983	0.299732
FBgn0003969	vap	11.5119	0.0451288	0.0451071	0.317078	0.758185
FBgn0003975	vg	12.3169	0.141594	0.0935868	0.130286	0.533324
FBgn0003977	vir	10.5144	0.0727822	0.0705381	0.302159	0.745689
FBgn0003978	vls	7.75705	0.213305	0.107285	0.0467876	0.325937
FBgn0003984	vn	10.3751	0.00476538	0.0860913	0.955858	0.990322
FBgn0003996	w	6.64115	0.136047	0.217585	0.531802	0.872776
FBgn0003997	hid	11.8873	0.201446	0.0858345	0.0189299	0.191918
FBgn0004003	wbl	11.8954	-0.104205	0.0878329	0.235463	0.683256
FBgn0004034	y	0.493343	-0.425721	1.29439	0.742234	0.945958
FBgn0004045	Yp1	-0.444145	0.0654434	2.39996	0.978246	NA
FBgn0004047	Yp3	7.29903	-3.4147	0.254763	5.77287e-41	8.35478e-38
FBgn0004049	yrt	12.1694	-0.0524761	0.0626694	0.402397	0.813933
FBgn0004050	z	10.5838	0.102181	0.048453	0.034956	0.275508
FBgn0004053	zen	-1.41167	-0.655848	4.62559	0.887248	NA
FBgn0004055	uzip	10.2701	-0.252348	0.0804068	0.00169873	0.0341457
FBgn0004057	Zw	8.2205	-0.101953	0.10655	0.338639	0.775124
FBgn0004066	Prosalpha4	10.9695	-0.0706665	0.0616035	0.251333	0.700007
FBgn0004087	Dhfr	8.48983	-0.254632	0.0975782	0.00906703	0.118771
FBgn0004101	bs	13.7088	0.0741459	0.0947415	0.433855	0.829453
FBgn0004102	oc	2.2617	0.75787	0.941776	0.420979	0.825838
FBgn0004103	Pp1-87B	13.0545	0.0055963	0.0297083	0.850583	0.968625
FBgn0004106	Cdk1	10.0833	0.045816	0.0576145	0.426488	0.827319
FBgn0004107	Cdk2	8.56936	0.0919663	0.0952699	0.334383	0.772083
FBgn0004108	Nrt	13.3407	-0.000756772	0.0509495	0.988149	0.997849
FBgn0004110	tin	0.39283	1.50312	1.3214	0.255321	0.705009
FBgn0004117	Tm2	5.16053	-1.3625	0.922005	0.139473	0.546291
FBgn0004118	nAChRbeta2	3.64239	0.173564	0.4661	0.709614	0.935967
FBgn0004132	boca	10.5346	0.145315	0.0715058	0.0421317	0.307928
FBgn0004133	blow	10.661	-0.229963	0.0503002	4.83526e-06	0.000243403
FBgn0004167	kst	12.9983	0.121068	0.109046	0.266894	0.71724
FBgn0004168	5-HT1A	3.99248	-0.473509	0.472403	0.316179	0.757285
FBgn0004169	up	6.04564	-0.993437	0.799216	0.213862	0.655399
FBgn0004170	sc	8.54036	0.0842351	0.0925942	0.362968	0.78926
FBgn0004177	mts	13.6006	-0.00838869	0.0288312	0.771083	0.949174
FBgn0004179	Csp	11.6342	-0.0228554	0.0444159	0.606849	0.903596
FBgn0004192	snRNA:U2:34ABb	0.179508	-1.257	1.4847	0.3972	0.811237
FBgn0004197	Ser	12.5483	-0.0703854	0.0830404	0.396659	0.810744
FBgn0004198	ct	10.6631	-0.0263623	0.111732	0.813478	0.961886
FBgn0004227	nonA	12.7053	0.00983412	0.0412086	0.811383	0.96149
FBgn0004228	mex1	0.533029	1.4355	1.22335	0.240629	0.689159
FBgn0004237	Hrb87F	12.5425	0.0670851	0.044719	0.133576	0.537402
FBgn0004240	DptA	3.10054	-0.468179	0.644114	0.467314	0.844705
FBgn0004242	Syt1	6.9107	-0.118789	0.173524	0.493616	0.855936
FBgn0004244	Rdl	5.8697	-0.42795	0.226716	0.0590796	0.368548
FBgn0004359	T48	10.84	-0.125958	0.0780392	0.106519	0.486109
FBgn0004360	Wnt2	11.5066	0.17519	0.0658851	0.0078366	0.107164
FBgn0004362	HmgD	12.7517	0.114658	0.0793717	0.148579	0.560966
FBgn0004363	porin	13.1242	-0.168095	0.0899717	0.0617189	0.377088
FBgn0004364	18w	13.1749	-0.0428556	0.0639016	0.502444	0.859531
FBgn0004367	mei-41	8.00846	0.175726	0.147371	0.2331	0.681001
FBgn0004368	Ptp4E	10.923	-0.0425964	0.0679744	0.530886	0.872419
FBgn0004369	Ptp99A	11.2443	0.0293333	0.0787368	0.709484	0.935967
FBgn0004370	Ptp10D	12.0622	-0.0413442	0.073301	0.572732	0.889559
FBgn0004373	fwd	11.9354	0.000918315	0.063625	0.988484	0.997849
FBgn0004374	neb	6.72903	0.269007	0.183037	0.141645	0.549403
FBgn0004378	Klp61F	8.78086	0.110871	0.157209	0.480655	0.852181
FBgn0004379	Klp67A	8.4253	0.0689751	0.117789	0.558156	0.885285
FBgn0004380	Klp64D	9.20679	-0.0658375	0.0718342	0.359394	0.786827
FBgn0004381	Klp68D	8.11914	-0.0629118	0.109154	0.564375	0.887094
FBgn0004387	Klp98A	12.2764	-0.261905	0.119424	0.0283027	0.244841
FBgn0004390	RasGAP1	11.7889	-0.00343031	0.0837618	0.967333	0.993439
FBgn0004391	shtd	9.43335	0.0976163	0.0869693	0.261683	0.71211
FBgn0004394	pdm2	12.2722	0.497949	0.0992515	5.2472e-07	3.2144e-05
FBgn0004395	unk	10.9588	0.0182894	0.0535195	0.732552	0.943083
FBgn0004396	CrebA	11.7237	0.0586741	0.0773261	0.447979	0.837353
FBgn0004397	Vinc	11.7053	0.0895497	0.0487334	0.0661299	0.389248
FBgn0004400	rhi	2.06419	-0.0242092	0.747568	0.974166	0.994338
FBgn0004401	Pep	13.5064	0.0582214	0.0292229	0.0463359	0.323903
FBgn0004403	RpS14a	13.7314	0.0936056	0.0671394	0.163258	0.588255
FBgn0004404	RpS14b	12.3651	0.106897	0.0673494	0.112467	0.496332
FBgn0004406	tam	7.25755	-0.165251	0.127066	0.193425	0.631112
FBgn0004419	me31B	11.7774	0.0045503	0.0461417	0.921443	0.982634
FBgn0004425	LysB	0.657451	-0.756537	1.09612	0.490072	0.85496
FBgn0004426	LysC	0.366075	-2.78151	1.62541	0.0870327	0.444287
FBgn0004427	LysD	2.25126	-1.04003	0.773442	0.17873	0.61255
FBgn0004428	LysE	2.01009	-0.025808	0.689343	0.970135	0.99409
FBgn0004429	LysP	-0.32822	-1.93299	1.6462	0.240308	NA
FBgn0004430	LysS	3.50001	-0.443113	0.453094	0.328089	0.768209
FBgn0004431	LysX	2.56124	-3.16188	2.3799	0.183988	0.619325
FBgn0004432	Cyp1	14.1164	0.0196513	0.0486584	0.686314	0.92818
FBgn0004435	Galphaq	9.69884	-0.0125186	0.065369	0.848129	0.968059
FBgn0004436	Ubc6	11.5486	-0.0762375	0.0456022	0.094565	0.462558
FBgn0004449	Ten-m	13.7996	-0.0333345	0.0893153	0.708982	0.935967
FBgn0004456	mew	12.4942	0.0759342	0.0669325	0.256589	0.706994
FBgn0004463	RpIII128	8.77291	0.0249354	0.0805009	0.756749	0.94738
FBgn0004465	Su(P)	8.62823	0.099274	0.077344	0.199303	0.637072
FBgn0004507	GlyP	6.5285	-0.311293	0.170135	0.0672978	0.393449
FBgn0004509	Fur1	11.3326	-0.0278412	0.0626872	0.65695	0.920647
FBgn0004510	Ets97D	8.68225	-0.0354785	0.080002	0.657426	0.920647
FBgn0004511	dy	4.52228	0.279354	0.288973	0.333688	0.771864
FBgn0004512	Mdr49	11.5232	-0.0430897	0.0808114	0.593886	0.898165
FBgn0004513	Mdr65	4.8661	-0.122209	0.334924	0.715196	0.938026
FBgn0004514	Oct-TyrR	0.553935	-0.926344	1.43581	0.518816	0.867153
FBgn0004516	Gad1	-0.982815	-2.01635	2.59832	0.437737	NA
FBgn0004552	Akh	2.1825	1.07195	0.728946	0.141412	0.548868
FBgn0004554	Edg91	4.72889	-0.0943416	0.455035	0.835753	0.966496
FBgn0004556	Dbp73D	7.42707	-0.209299	0.11251	0.0628485	0.380774
FBgn0004567	slp2	4.24038	0.495192	0.498178	0.32022	0.760208
FBgn0004569	aos	9.39104	-0.0373286	0.0878536	0.670913	0.923023
FBgn0004573	5-HT7	2.27515	-0.45706	0.770384	0.552988	0.883248
FBgn0004574	Rop	11.8287	0.188111	0.0563856	0.000849455	0.0201095
FBgn0004575	Syn	6.17739	-0.210146	0.221867	0.343551	0.776627
FBgn0004577	Pxd	9.34261	-0.724491	0.213369	0.000685072	0.0170576
FBgn0004580	Cbp53E	3.89942	-1.52594	0.405122	0.000165478	0.00540328
FBgn0004581	bgcn	3.69015	0.258974	0.466136	0.578501	0.892604
FBgn0004583	ex	13.0247	0.0245612	0.0799784	0.758769	0.947766
FBgn0004584	Rrp1	9.60355	0.0532643	0.108839	0.624569	0.913269
FBgn0004587	B52	13.2859	-0.0354992	0.0282156	0.208341	0.646521
FBgn0004588	Eig71Ea	-0.0877655	-1.23039	2.03844	0.546114	0.880461
FBgn0004589	Eig71Eb	-0.26714	2.1295	2.16682	0.325717	0.765405
FBgn0004592	Eig71Ee	3.10934	0	5.20139	NA	NA
FBgn0004594	Eig71Eg	-1.32503	-1.18407	3.4096	0.728384	NA
FBgn0004595	pros	9.04369	-0.200654	0.15434	0.193573	0.631112
FBgn0004597	CycC	9.0146	-0.0769878	0.0713025	0.28026	0.729321
FBgn0004598	Fur2	12.4119	0.0896183	0.0591931	0.130026	0.533221
FBgn0004606	zfh1	9.90136	0.0213647	0.120074	0.858779	0.970516
FBgn0004607	zfh2	13.1036	0.0122644	0.151547	0.935499	0.98636
FBgn0004611	Plc21C	10.4233	0.0377493	0.0677266	0.57727	0.89158
FBgn0004618	gl	2.77746	2.3033	1.98072	0.244885	0.693344
FBgn0004619	GluRIA	-0.520471	-1.3374	1.63061	0.41211	NA
FBgn0004620	GluRIIA	2.2198	-0.922801	0.924707	0.318309	0.759365
FBgn0004622	TkR99D	0.541801	3.09562	1.63028	0.0575874	0.364611
FBgn0004623	Gbeta76C	1.35073	3.42621	2.84757	0.228896	0.67727
FBgn0004629	Cys	6.7144	-0.427055	0.197135	0.0302876	0.255289
FBgn0004635	rho	10.1643	-0.0681467	0.0711929	0.33846	0.775124
FBgn0004636	Rap1	12.0406	-0.0457857	0.0428009	0.284739	0.732451
FBgn0004638	drk	12.2768	-0.0711682	0.0558556	0.202612	0.64024
FBgn0004643	Zw10	10.0338	0.131223	0.0657637	0.0460026	0.322408
FBgn0004644	hh	11.3499	0.119571	0.0496767	0.0160848	0.172755
FBgn0004646	ogre	14.464	-0.356701	0.0498528	8.36166e-13	1.29082e-10
FBgn0004647	N	14.3131	0.067503	0.0912808	0.459597	0.841944
FBgn0004648	svr	11.9748	0.00570032	0.0561503	0.919138	0.982634
FBgn0004650	fs(1)N	4.14813	-0.622668	0.379774	0.101094	0.474101
FBgn0004652	fru	12.9306	-0.828888	0.446662	0.0634907	0.382003
FBgn0004654	Pgd	10.4394	0.126281	0.0584061	0.0306085	0.256066
FBgn0004655	wapl	10.9033	-0.00853129	0.0692524	0.901956	0.978946
FBgn0004656	fs(1)h	12.9627	0.0483531	0.0983506	0.622974	0.91278
FBgn0004657	mys	12.7818	-0.033921	0.0404006	0.401123	0.812728
FBgn0004687	Mlc-c	11.7028	-0.000541159	0.0538998	0.991989	0.998139
FBgn0004698	Xpc	10.7429	0.127248	0.0487112	0.00899356	0.118461
FBgn0004777	Ccp84Ag	1.56663	-1.00121	1.50063	0.504648	0.860341
FBgn0004780	Ccp84Ad	1.11898	0.174599	1.29567	0.892805	0.977042
FBgn0004782	Ccp84Ab	-0.809771	-0.273255	2.06372	0.894661	NA
FBgn0004784	inaC	1.92828	2.00505	2.87384	0.485371	0.852649
FBgn0004795	retn	3.57615	0.351299	1.61844	0.828161	0.964245
FBgn0004797	mdy	8.98525	0.045829	0.101581	0.651878	0.919187
FBgn0004811	fs(2)ltoPP43	10.0107	0.0742609	0.0747292	0.320353	0.760208
FBgn0004828	His3.3B	14.5734	0.0455663	0.0423675	0.28215	0.731139
FBgn0004832	Xpac	8.54928	0.0950225	0.0827694	0.250952	0.699284
FBgn0004837	Su(H)	10.3673	-0.0577791	0.0751444	0.441948	0.833667
FBgn0004838	Hrb27C	14.7299	0.0386077	0.0484081	0.425134	0.827319
FBgn0004839	otk	11.1949	0.035455	0.0632988	0.575397	0.891471
FBgn0004841	TkR86C	0.162682	0.353036	1.30151	0.786198	0.952189
FBgn0004852	Ac76E	3.41129	-0.182233	0.524778	0.728398	0.942358
FBgn0004854	B-H2	5.19688	-0.0824653	0.280217	0.768535	0.949174
FBgn0004855	RpII15	9.02819	0.00934253	0.0731768	0.89841	0.978314
FBgn0004856	Bx42	10.3118	0.104617	0.0529423	0.0481485	0.33126
FBgn0004858	elB	10.6227	0.0471577	0.084617	0.577317	0.89158
FBgn0004859	ci	13.1557	0.0669719	0.0811248	0.409065	0.818412
FBgn0004860	ph-d	10.7621	0.120922	0.0703765	0.0857576	0.443963
FBgn0004861	ph-p	11.2138	0.00635825	0.0828015	0.938791	0.987601
FBgn0004863	C15	4.38767	-0.912436	0.895623	0.308311	0.750395
FBgn0004864	hop	10.6317	-0.0432033	0.0765871	0.572682	0.889559
FBgn0004865	Eip78C	13.5929	-0.65289	0.290899	0.0248075	0.22558
FBgn0004867	RpS2	14.4782	0.0473978	0.0544761	0.384264	0.805715
FBgn0004868	Gdi	13.1782	-0.037926	0.033353	0.255493	0.705316
FBgn0004870	bab1	6.24679	-0.047438	0.249632	0.849284	0.968401
FBgn0004872	piwi	2.24285	-0.499682	0.845134	0.554355	0.884432
FBgn0004875	enc	11.2713	0.0202989	0.0821863	0.804918	0.959867
FBgn0004876	cdi	11.8557	-0.110779	0.0750265	0.139801	0.546291
FBgn0004878	cas	-1.06409	0.786788	3.05057	0.796472	NA
FBgn0004880	scrt	8.16354	0.618055	0.166443	0.000204568	0.00640132
FBgn0004882	orb	3.81313	-0.121673	0.364035	0.738203	0.944828
FBgn0004885	tok	12.3078	-0.230757	0.0922088	0.0123302	0.14464
FBgn0004888	Scsalpha1	11.1081	0.0229655	0.053789	0.669412	0.922663
FBgn0004889	tws	11.7792	-0.014512	0.0597406	0.808069	0.96086
FBgn0004892	sob	8.37366	-0.329545	0.378454	0.383883	0.805715
FBgn0004893	bowl	13.6868	0.0911649	0.039819	0.0220512	0.210934
FBgn0004895	FoxL1	-0.044772	1.08156	1.55097	0.485586	0.852649
FBgn0004897	fd96Ca	4.60043	0.107244	0.413544	0.795381	0.955631
FBgn0004898	fd96Cb	5.93904	0.53115	0.353747	0.133228	0.537088
FBgn0004901	Prat	9.85688	0.0832624	0.064441	0.196333	0.634708
FBgn0004903	Rb97D	10.7793	-0.0918423	0.0485581	0.0585724	0.367032
FBgn0004907	14-3-3zeta	13.9033	0.0253388	0.037907	0.503848	0.859713
FBgn0004908	Arl2	8.45853	-0.0621518	0.113292	0.58328	0.893164
FBgn0004910	Eip63F-1	3.34678	-2.69367	0.725245	0.000203891	0.00639741
FBgn0004913	Gnf1	9.41715	0.038038	0.0697006	0.585249	0.894278
FBgn0004914	Hnf4	10.0385	-0.0930701	0.0663445	0.160667	0.584052
FBgn0004915	TfIIB	10.2085	-0.00334995	0.0651638	0.959	0.991101
FBgn0004919	gol	7.03121	-0.477543	0.21902	0.029231	0.249435
FBgn0004921	Ggamma1	12.5267	-0.274029	0.0531765	2.56082e-07	1.66568e-05
FBgn0004924	Top1	12.7648	-0.0622841	0.0589449	0.290672	0.737864
FBgn0004926	eIF2beta	11.6729	-0.0465172	0.0503222	0.355285	0.784415
FBgn0004956	upd1	10.5909	0.212516	0.117082	0.0695072	0.400375
FBgn0004957	por	9.36626	0.000282241	0.0641332	0.996489	0.998991
FBgn0004959	phm	7.06379	0.1465	0.181057	0.418437	0.825045
FBgn0005198	gig	10.6534	-0.0897156	0.0755762	0.235193	0.682986
FBgn0005278	Sam-S	12.5338	0.013489	0.0391431	0.73039	0.942739
FBgn0005322	nmd	9.28039	0.113765	0.0566261	0.0445306	0.316531
FBgn0005355	Su(fu)	10.4839	0.00109214	0.0565137	0.984582	0.997161
FBgn0005386	ash1	10.4283	0.0207263	0.0714168	0.771651	0.949174
FBgn0005390	fs(1)M3	0.0268685	1.86752	1.68079	0.266527	0.71714
FBgn0005391	Yp2	2.2786	-0.530591	0.820883	0.518042	0.866497
FBgn0005411	U2af50	11.3107	-0.000661769	0.0481165	0.989027	0.997995
FBgn0005427	ewg	11.615	0.264972	0.0632563	2.80353e-05	0.00120128
FBgn0005533	RpS17	14.2921	0.0578645	0.0665326	0.384455	0.805715
FBgn0005536	Mbs	11.8013	-0.045309	0.0616544	0.462408	0.842643
FBgn0005558	ey	4.67354	-0.000998826	0.322999	0.997533	0.999287
FBgn0005561	sv	8.91247	-0.259457	0.139343	0.0626021	0.379862
FBgn0005564	Shal	4.50602	-0.221071	0.346852	0.523887	0.868985
FBgn0005585	Calr	14.8094	-0.122147	0.0468508	0.00913026	0.119049
FBgn0005586	Rab3	6.40491	0.0890716	0.151755	0.557242	0.885157
FBgn0005593	RpL7	14.8987	0.104126	0.0582629	0.07391	0.414093
FBgn0005596	yem	9.6567	0.0551033	0.0635974	0.38625	0.806858
FBgn0005612	Sox14	10.7436	0.109138	0.0660142	0.0982804	0.467114
FBgn0005613	Sox15	10.3565	-0.00966684	0.195189	0.960501	0.991678
FBgn0005616	msl-2	9.29721	-0.0788146	0.0724808	0.276866	0.726958
FBgn0005617	msl-1	9.85784	-0.00316957	0.0727916	0.965269	0.992786
FBgn0005619	Hdc	1.97045	-1.11571	0.6999	0.110915	0.493877
FBgn0005624	Psc	11.1264	0.0388634	0.092243	0.673525	0.92433
FBgn0005626	ple	5.50694	-0.657662	0.242379	0.00666057	0.0947373
FBgn0005631	robo1	11.9571	-0.0739068	0.0761453	0.331747	0.770814
FBgn0005632	faf	12.7208	-0.0109395	0.0845155	0.897011	0.97802
FBgn0005633	fln	-0.0931529	2.28931	1.68165	0.173403	0.603989
FBgn0005636	nvy	6.82979	0.00212235	0.193246	0.991237	0.998113
FBgn0005638	slbo	0.809142	0.694135	1.24636	0.577575	0.891643
FBgn0005640	Eip63E	11.0298	0.000758825	0.0455334	0.986704	0.997647
FBgn0005642	wdn	9.5467	0.0694473	0.066844	0.29883	0.745016
FBgn0005648	Pabp2	12.042	0.0992479	0.0437995	0.0234539	0.218327
FBgn0005649	Rox8	12.6036	-0.00537331	0.0307367	0.861223	0.971713
FBgn0005655	PCNA	7.5739	-0.145128	0.163924	0.375976	0.799165
FBgn0005658	Ets65A	5.78462	0.118326	0.206241	0.56615	0.887367
FBgn0005659	Ets98B	9.57986	0.206881	0.0869025	0.0172842	0.181413
FBgn0005660	Ets21C	6.20446	0.284983	0.185754	0.124981	0.52344
FBgn0005664	Crys	2.81638	-1.24168	1.38472	0.369878	0.793607
FBgn0005666	bt	7.78686	-0.795582	0.477522	0.0957007	0.463592
FBgn0005670	Cyp4d1	1.62509	1.065	1.04337	0.307383	0.750185
FBgn0005671	Vha55	11.2833	0.00483735	0.0444163	0.913274	0.981677
FBgn0005672	spi	12.3846	0.026618	0.0689441	0.699436	0.932206
FBgn0005674	GluProRS	12.4863	0.144799	0.0515921	0.00500658	0.0765735
FBgn0005677	dac	10.1863	0.100519	0.186919	0.590737	0.89652
FBgn0005683	pie	5.98429	0.431148	0.192446	0.0250681	0.227242
FBgn0005694	Aef1	10.6422	-0.0266098	0.0507682	0.600179	0.900772
FBgn0005695	gcl	8.89721	-0.0432685	0.0643826	0.50155	0.859025
FBgn0005696	DNApol-alpha73	5.10601	0.248239	0.27566	0.367841	0.792214
FBgn0005771	noc	11.607	0.0724263	0.05401	0.179928	0.614696
FBgn0005775	Con	9.54849	-0.0528561	0.116452	0.649911	0.918849
FBgn0005777	PpD3	9.55412	-0.0073117	0.0580622	0.899788	0.978314
FBgn0005779	PpD6	-1.03234	0.786778	2.39204	0.742219	NA
FBgn0008635	betaCOP	12.535	-0.0137145	0.046924	0.770079	0.949174
FBgn0008636	hbn	-1.33069	-1.32108	2.59763	0.611053	NA
FBgn0008646	E5	9.83123	-0.0479506	0.0846772	0.571206	0.889335
FBgn0008651	lbl	3.11268	-0.413333	0.593139	0.485892	0.852649
FBgn0010014	CanB	5.29575	-0.400404	0.242222	0.0983214	0.467117
FBgn0010019	Cyp4g1	5.53329	-2.76164	1.63662	0.0915258	0.455121
FBgn0010038	GstD2	5.67537	0.225195	0.327942	0.492278	0.855667
FBgn0010039	GstD3	10.2606	-0.0619528	0.118879	0.602268	0.90139
FBgn0010040	GstD4	3.73975	0.321982	0.346124	0.352241	0.782087
FBgn0010041	GstD5	6.75525	0.771997	0.337172	0.0220433	0.210934
FBgn0010042	GstD6	0.920174	2.04612	1.09558	0.0618166	0.377432
FBgn0010043	GstD7	0.610523	2.83637	1.62453	0.0808177	0.432597
FBgn0010044	GstD8	-0.57142	-0.453474	2.14802	0.8328	NA
FBgn0010051	Itpr	11.6282	0.0653823	0.0895617	0.465374	0.844248
FBgn0010052	Jhe	4.43569	0.611887	0.411787	0.137297	0.544358
FBgn0010053	Jheh1	6.50767	0.180652	0.145075	0.213046	0.654282
FBgn0010078	RpL23	14.4898	0.157808	0.0646111	0.0145885	0.16284
FBgn0010097	gammaTub37C	0.334549	-1.97763	1.55702	0.204036	0.642287
FBgn0010100	mAcon1	11.9495	-0.0667304	0.0412845	0.106017	0.485358
FBgn0010105	comm	7.29888	0.0687873	0.121349	0.570813	0.889335
FBgn0010109	dpn	8.72961	0.231795	0.118942	0.0513187	0.343649
FBgn0010113	hdc	12.0901	0.204157	0.128743	0.112792	0.496543
FBgn0010114	hig	3.60773	-0.303851	0.416472	0.465644	0.844248
FBgn0010173	RpA-70	10.0787	0.101179	0.0527684	0.0551855	0.357899
FBgn0010194	Wnt5	12.2256	-0.0049894	0.0512463	0.92244	0.982751
FBgn0010197	Gyc32E	2.18199	0.29195	0.635064	0.645719	0.917162
FBgn0010198	RpS15Aa	14.1461	0.0961842	0.0643252	0.134841	0.539831
FBgn0010213	Sod2	10.252	0.0877927	0.0744186	0.238113	0.686644
FBgn0010215	alpha-Cat	12.6033	-0.0834988	0.040688	0.040153	0.301095
FBgn0010217	ATPsynbeta	13.672	-0.0259802	0.0429867	0.545594	0.880461
FBgn0010220	Dbp45A	8.22537	0.196902	0.0964344	0.0411686	0.305349
FBgn0010222	Nmdmc	8.39387	-0.0957554	0.119917	0.424574	0.827319
FBgn0010223	Galphaf	2.21259	-2.01526	1.11446	0.0705614	0.404036
FBgn0010225	Gel	11.7717	0.0479957	0.0579778	0.407767	0.817603
FBgn0010226	GstS1	12.6716	0.0378734	0.0654758	0.562971	0.886813
FBgn0010228	HmgZ	12.8729	-0.161121	0.0641567	0.0120267	0.142815
FBgn0010235	Klc	11.346	-0.03883	0.0394098	0.324483	0.764428
FBgn0010238	Lac	14.1766	0.122773	0.0373896	0.00102487	0.0232718
FBgn0010240	Lcch3	4.71843	0.127079	0.274941	0.643933	0.917144
FBgn0010241	Mdr50	1.1071	-0.939833	1.1198	0.40131	0.812728
FBgn0010246	Myo61F	9.01674	-0.091263	0.128276	0.4768	0.850538
FBgn0010247	Parp	10.2981	-0.0353859	0.0797916	0.657419	0.920647
FBgn0010258	Rbp4	4.36018	0.258269	0.319836	0.419374	0.825045
FBgn0010263	Rbp9	7.75309	-0.0823996	0.160814	0.608378	0.904791
FBgn0010265	RpS13	14.5929	0.00808375	0.058433	0.88997	0.97607
FBgn0010269	Dsor1	9.89305	0.039395	0.0638707	0.537371	0.876406
FBgn0010278	Ssrp	10.3136	0.127136	0.0632599	0.0444593	0.316531
FBgn0010280	Taf4	11.9638	0.146074	0.0591076	0.0134612	0.153249
FBgn0010282	TfIIFalpha	10.7615	-0.0272961	0.0491913	0.578965	0.892876
FBgn0010287	Trf	7.50262	0.118953	0.11987	0.321028	0.761184
FBgn0010288	Uch	10.5103	0.0248174	0.0561012	0.658222	0.920716
FBgn0010292	bys	8.54569	0.133363	0.0852722	0.117824	0.508252
FBgn0010300	brat	13.8612	0.137007	0.0678947	0.0435975	0.314108
FBgn0010303	hep	10.9163	-0.0566372	0.0646842	0.38125	0.803881
FBgn0010309	pigeon	9.07688	-0.136551	0.0612214	0.025718	0.230539
FBgn0010313	corto	12.0626	0.0797019	0.070854	0.260642	0.711773
FBgn0010314	Cks30A	5.82046	0.0384755	0.262337	0.883397	0.975573
FBgn0010315	CycD	9.97543	-0.0633499	0.0525685	0.228167	0.676672
FBgn0010316	dap	9.3747	0.117347	0.0909053	0.196749	0.634708
FBgn0010323	Gsc	-0.635321	0	2.90622	1	NA
FBgn0010328	woc	12.0412	-0.000189032	0.0813809	0.998147	0.99938
FBgn0010329	Tbh	1.23405	0.522277	0.963302	0.587699	0.895415
FBgn0010333	Rac1	11.18	-0.0267965	0.0394477	0.496954	0.857358
FBgn0010339	128up	9.8396	0.0322892	0.0547983	0.555702	0.884961
FBgn0010340	140up	7.56293	-0.181837	0.125503	0.147375	0.558477
FBgn0010341	Cdc42	12.6427	-0.0312824	0.0314579	0.320018	0.760208
FBgn0010342	Map60	11.1468	-0.046533	0.0578339	0.421052	0.825841
FBgn0010348	Arf79F	13.7325	-0.0236744	0.0382415	0.535866	0.875461
FBgn0010350	Cds	10.3565	-0.0459686	0.0529689	0.385482	0.806234
FBgn0010352	Nc73EF	11.393	-0.347665	0.0563107	6.65664e-10	7.07069e-08
FBgn0010355	Taf1	11.8662	0.00450914	0.0756838	0.952491	0.989589
FBgn0010356	Taf5	9.29185	-0.00787167	0.0602934	0.896127	0.977608
FBgn0010379	Akt1	11.9146	0.000952584	0.0476206	0.98404	0.997161
FBgn0010380	AP-1-2beta	11.7554	0.0264484	0.0413515	0.522432	0.868582
FBgn0010382	CycE	9.08109	0.102768	0.0779646	0.187459	0.623533
FBgn0010383	Cyp18a1	7.12573	0.0659492	0.244619	0.787469	0.953009
FBgn0010385	Def	4.60462	0.11609	0.463316	0.802152	0.958684
FBgn0010387	Acbp2	1.88332	-0.771836	0.927336	0.405231	0.815659
FBgn0010388	Dro	2.84808	0.0857847	0.562456	0.878778	0.975339
FBgn0010389	htl	6.23686	-0.121247	0.199052	0.542445	0.87939
FBgn0010391	SrpRalpha	11.2204	0.0815596	0.0500759	0.103372	0.478738
FBgn0010395	Itgbn	2.5784	0.0199998	0.674097	0.976331	0.994891
FBgn0010397	LamC	7.87791	-0.0457938	0.164889	0.781224	0.951347
FBgn0010398	Lrr47	7.60947	-0.227911	0.109407	0.0372376	0.287248
FBgn0010399	Nmdar1	3.83799	-0.539704	0.385697	0.161725	0.585424
FBgn0010401	Os-C	4.30646	-0.637533	0.403069	0.113718	0.498724
FBgn0010406	RNaseX25	10.2458	-0.0535264	0.0569732	0.347474	0.77961
FBgn0010407	Ror	4.9955	-0.25246	0.286594	0.378373	0.801171
FBgn0010408	RpS9	14.415	0.029926	0.074564	0.688165	0.929182
FBgn0010409	RpL18A	14.4899	0.104763	0.0562732	0.0626463	0.379862
FBgn0010411	RpS18	14.1733	-0.0271901	0.0752668	0.717912	0.93891
FBgn0010412	RpS19a	14.3258	-0.0603695	0.0741225	0.415384	0.823513
FBgn0010414	SerT	3.51073	0.196681	0.708554	0.781334	0.951347
FBgn0010415	Sdc	13.8232	0.0954071	0.0503527	0.0581221	0.365693
FBgn0010416	TH1	9.81814	0.000927317	0.0512012	0.98555	0.99724
FBgn0010417	Taf6	9.895	-0.0096051	0.0563857	0.864738	0.972127
FBgn0010421	TfIIFbeta	9.16518	-0.0465301	0.0692606	0.501704	0.859025
FBgn0010422	TfIIS	10.4322	-0.0429981	0.0513307	0.402217	0.813735
FBgn0010424	TpnC73F	5.50703	-1.07431	0.464628	0.0207665	0.204104
FBgn0010431	mtrm	1.90494	1.04575	0.752599	0.164676	0.59189
FBgn0010433	ato	-0.754543	0.0986454	2.40002	0.967215	NA
FBgn0010434	cora	13.5738	0.0189873	0.0550521	0.730172	0.942739
FBgn0010435	emp	12.515	0.0588161	0.0404114	0.145549	0.555241
FBgn0010438	mtSSB	7.3481	0.170228	0.137317	0.215095	0.65723
FBgn0010441	pll	9.5432	0.168918	0.0615328	0.00604783	0.0879671
FBgn0010452	trn	11.9696	-0.0641069	0.0885405	0.469041	0.845881
FBgn0010453	Wnt4	10.6292	-0.08314	0.0904416	0.357956	0.786118
FBgn0010470	Fkbp14	11.6236	0.0244731	0.0972698	0.80135	0.958474
FBgn0010473	tutl	13.1983	0.0760403	0.0808627	0.347032	0.779191
FBgn0010482	l(2)01289	5.54228	3.22844	0.384489	4.59206e-17	1.29675e-14
FBgn0010488	NAT1	14.5625	0.0227098	0.0537576	0.672699	0.92433
FBgn0010497	dmGlut	7.30239	-0.0182492	0.133123	0.890963	0.976506
FBgn0010501	Dcp-1	10.6657	0.0906228	0.0518614	0.0805673	0.432301
FBgn0010504	kermit	9.74478	-0.495622	0.0603382	2.13825e-16	4.95132e-14
FBgn0010516	wal	10.3858	-0.0448502	0.0596068	0.45179	0.838945
FBgn0010520	Bka	7.33266	0.225048	0.119109	0.0588341	0.367816
FBgn0010531	Ccs	7.97716	-0.226971	0.095404	0.0173571	0.181413
FBgn0010548	Aldh-III	11.2512	0.171571	0.0404986	2.27073e-05	0.000995852
FBgn0010549	l(2)03659	6.61249	0.35331	0.175017	0.0435167	0.313819
FBgn0010551	Phb2	11.1989	-0.0213846	0.0400682	0.593547	0.898165
FBgn0010583	dock	10.697	-0.00368977	0.0535883	0.945106	0.987673
FBgn0010590	Prosbeta1	10.768	-0.0555296	0.0698566	0.426666	0.827319
FBgn0010591	Sply	9.55495	-0.0267727	0.065572	0.683057	0.927212
FBgn0010602	lwr	12.0272	0.0318309	0.0486214	0.512682	0.864095
FBgn0010607	l(2)05714	8.22765	-0.12692	0.0967772	0.189702	0.626607
FBgn0010611	Hmgs	9.40577	-0.0955361	0.0606714	0.115338	0.50259
FBgn0010612	ATPsynG	10.799	-0.367796	0.0860153	1.90341e-05	0.000857499
FBgn0010620	CG10939	10.4956	-0.0943507	0.0872122	0.279318	0.728821
FBgn0010621	CCT5	11.8382	-0.0466449	0.0535281	0.383531	0.805609
FBgn0010622	DCTN3-p24	9.45925	-0.167019	0.0726315	0.021474	0.208086
FBgn0010638	Sec61beta	12.3599	-0.0984681	0.0653181	0.131678	0.534637
FBgn0010651	MFS14	9.08945	0.114727	0.129264	0.37479	0.798528
FBgn0010660	Nup214	10.7998	-0.00756116	0.0762645	0.921024	0.982634
FBgn0010741	Pfdn2	10.2779	-0.0440456	0.0606085	0.467396	0.844705
FBgn0010747	Srp54k	11.2448	-0.0279588	0.0441262	0.526336	0.870492
FBgn0010750	atms	9.55346	0.0698911	0.0605175	0.248136	0.695621
FBgn0010762	simj	11.717	-0.0247687	0.046568	0.594808	0.89831
FBgn0010768	sqz	8.56782	0.0107199	0.130953	0.934757	0.985915
FBgn0010770	ppan	7.66824	0.0669517	0.142438	0.638326	0.915681
FBgn0010772	Xe7	12.3821	-0.0224546	0.040926	0.583237	0.893164
FBgn0010774	Ref1	12.4933	0.0151658	0.0427777	0.722945	0.940267
FBgn0010786	l(3)02640	9.63941	-0.0776707	0.0613046	0.205168	0.642444
FBgn0010803	TrpRS	9.53758	0.011678	0.0670225	0.861677	0.971713
FBgn0010808	Chchd3	9.38356	0.0316405	0.0796368	0.691139	0.930033
FBgn0010812	unc-45	9.78248	-0.0175931	0.0640897	0.783695	0.951491
FBgn0010825	Gug	12.8623	0.0228722	0.0887463	0.796619	0.955975
FBgn0010830	l(3)04053	9.58864	0.0469232	0.059865	0.433147	0.829364
FBgn0010877	l(3)05822	10.733	0.0316774	0.0483788	0.512611	0.864095
FBgn0010894	sinu	11.3409	-0.0764186	0.0426837	0.0733985	0.413129
FBgn0010905	Spn	12.7263	0.0890797	0.102834	0.386355	0.806858
FBgn0010909	msn	13.3956	0.0705089	0.0513327	0.169577	0.599388
FBgn0010926	l(3)07882	8.67813	0.0162738	0.0714493	0.819827	0.962771
FBgn0011016	SsRbeta	12.3378	-0.0357662	0.0585561	0.54133	0.878637
FBgn0011020	Sas-4	8.32239	0.0831797	0.0893593	0.351934	0.78194
FBgn0011202	dia	10.6392	0.12615	0.0557605	0.0236751	0.219816
FBgn0011204	cue	9.45502	-0.176022	0.0637655	0.00577207	0.0848085
FBgn0011205	fbl	9.51207	0.107406	0.0855092	0.20909	0.647285
FBgn0011206	bol	6.35956	-0.0728323	0.271094	0.788191	0.953211
FBgn0011207	pelo	9.88518	0.120113	0.070516	0.0885036	0.44775
FBgn0011211	blw	13.6595	-0.0604139	0.0370637	0.103101	0.478054
FBgn0011217	eff	13.4654	-0.0433494	0.0345485	0.209573	0.647915
FBgn0011224	heph	15.1705	-0.0501146	0.0615913	0.415838	0.823996
FBgn0011225	jar	14.2827	-0.0786638	0.0610286	0.19741	0.634767
FBgn0011227	ox	8.65609	0.0149485	0.139877	0.914893	0.98207
FBgn0011230	poe	13.5251	0.00795128	0.120848	0.947541	0.988256
FBgn0011232	scat	9.25057	0.0696331	0.0580143	0.230033	0.67817
FBgn0011236	ken	9.28224	0.31067	0.131157	0.0178513	0.183881
FBgn0011244	Hsp60B	-0.923247	2.27413	2.27632	0.317776	NA
FBgn0011259	Sema1a	11.1908	-0.00678661	0.0960681	0.943681	0.987601
FBgn0011260	Sema2a	14.2133	-0.0185986	0.0387454	0.631213	0.91498
FBgn0011272	RpL13	14.3259	0.0767076	0.0748224	0.305271	0.7483
FBgn0011274	Dif	8.49568	-1.27836	0.124113	7.04731e-25	5.09961e-22
FBgn0011277	HLH4C	-0.970388	1.54694	2.40607	0.520267	NA
FBgn0011279	Obp69a	2.91374	0.318766	0.481341	0.507814	0.862219
FBgn0011282	Obp84a	3.40812	0.101267	0.452896	0.823069	0.963747
FBgn0011284	RpS4	14.9319	0.110418	0.0541728	0.0415244	0.306687
FBgn0011286	RyR	7.60958	1.46186	0.37267	8.75722e-05	0.00313904
FBgn0011288	Snap25	5.38153	-0.405166	0.234551	0.0840939	0.439963
FBgn0011289	TfIIA-L	10.4357	-0.0195796	0.0424983	0.645003	0.917162
FBgn0011290	Taf12	9.85302	0.000561349	0.0518077	0.991355	0.998113
FBgn0011291	Taf11	8.90997	-0.0227893	0.0822987	0.78185	0.951491
FBgn0011296	l(2)efl	2.58037	-0.312509	0.714792	0.661964	0.921218
FBgn0011297	Alg3	8.08552	1.50884	0.106865	2.89688e-45	5.59002e-42
FBgn0011300	babo	13.1229	-0.0434352	0.0740056	0.557259	0.885157
FBgn0011305	Rsf1	12.2072	0.0523703	0.0342443	0.126187	0.525617
FBgn0011327	Uch-L5	10.0957	0.067244	0.0613479	0.273031	0.723542
FBgn0011335	vers	8.30636	-0.0479731	0.100318	0.6325	0.91498
FBgn0011336	Stt3B	12.1566	0.0337797	0.042436	0.426024	0.827319
FBgn0011361	ND-ACP	10.0121	0.0461497	0.0668033	0.489673	0.854602
FBgn0011455	ND-SGDH	9.46281	0.0333767	0.0874096	0.702578	0.933706
FBgn0011474	PR-Set7	10.8772	-0.0408508	0.0519683	0.431825	0.82905
FBgn0011476	l(3)neo43	6.36958	-0.129767	0.185626	0.484505	0.852649
FBgn0011481	Ssdp	12.2092	0.00761543	0.0559762	0.891784	0.976828
FBgn0011509	SrpRbeta	10.1336	0.253405	0.0823894	0.00210012	0.040058
FBgn0011559	Acp36DE	-0.102705	-0.923186	1.87662	0.622761	0.912584
FBgn0011566	Smyd3	8.45671	0.024453	0.094094	0.794957	0.955631
FBgn0011569	can	-0.866786	1.55918	2.23459	0.485333	NA
FBgn0011570	cpb	11.2923	0.0155705	0.0497799	0.754443	0.947186
FBgn0011573	Cdc37	10.6461	-0.066268	0.0458963	0.148777	0.561271
FBgn0011576	Cyp4d2	7.20653	-0.466926	0.140246	0.00087051	0.0203611
FBgn0011582	Dop1R1	2.33602	-1.04847	0.769352	0.172947	0.603285
FBgn0011584	Trp1	12.1702	-0.029296	0.0602879	0.627014	0.914849
FBgn0011586	e(r)	10.2825	-0.00532081	0.0550617	0.923017	0.982751
FBgn0011589	Elk	3.07512	0.0928289	0.54478	0.864698	0.972127
FBgn0011591	fng	12.9563	0.0122516	0.0522483	0.814606	0.961986
FBgn0011592	fra	12.7541	0.0585832	0.0788076	0.457258	0.841377
FBgn0011596	fzo	0.947082	0.888353	1.37732	0.518936	0.867153
FBgn0011603	ine	5.90409	0.0677921	0.219121	0.757031	0.94738
FBgn0011604	Iswi	11.6585	-0.0138713	0.042784	0.745774	0.946294
FBgn0011606	Klp3A	10.5649	0.100723	0.0569192	0.0767972	0.421202
FBgn0011638	La	10.1334	0.0670009	0.0657875	0.308467	0.750458
FBgn0011640	lark	12.0874	0.00311455	0.0490842	0.949406	0.988849
FBgn0011642	Zyx	11.8996	0.0530924	0.0479403	0.268091	0.718265
FBgn0011648	Mad	12.0633	0.254296	0.0825622	0.00206962	0.0395414
FBgn0011653	mas	12.5792	-0.121756	0.0826475	0.140697	0.548037
FBgn0011655	Med	11.3616	-0.0263437	0.0651783	0.686081	0.928172
FBgn0011656	Mef2	10.1999	0.144096	0.141561	0.308721	0.750919
FBgn0011659	Mlh1	6.08159	-0.143012	0.173751	0.41046	0.819363
FBgn0011660	Pms2	7.96794	0.394866	0.11808	0.00082565	0.0197017
FBgn0011661	Moe	12.78	0.0323775	0.041579	0.436157	0.830231
FBgn0011666	msi	10.4399	0.184794	0.10798	0.0870121	0.444287
FBgn0011672	Mvl	10.1822	0.0281407	0.0581468	0.628415	0.91498
FBgn0011674	insc	7.95616	-0.181606	0.137908	0.187884	0.624018
FBgn0011676	Nos	3.64331	-0.870324	0.704942	0.216978	0.660922
FBgn0011692	pav	7.99294	0.0910544	0.158243	0.565014	0.887367
FBgn0011693	Pdh	1.85373	1.47669	0.837334	0.0778068	0.424811
FBgn0011695	EbpIII	8.65208	0.29319	0.121561	0.0158705	0.170928
FBgn0011701	repo	7.43132	-0.308586	0.152045	0.0423997	0.309133
FBgn0011703	RnrL	8.62351	0.127566	0.106386	0.230497	0.67817
FBgn0011704	RnrS	7.68346	-0.281552	0.123925	0.0230887	0.216629
FBgn0011705	rost	6.43582	0.356015	0.165127	0.0310826	0.257421
FBgn0011706	rpr	7.6452	0.288761	0.138846	0.0375515	0.288294
FBgn0011708	Syx5	10.0535	-0.101035	0.0530371	0.0567819	0.363051
FBgn0011710	2024-09-01	11.393	0.0701054	0.0401445	0.080754	0.432456
FBgn0011715	Snr1	10.2105	-0.00885886	0.0535862	0.868692	0.973084
FBgn0011722	Tig	3.8095	-0.0265562	0.462185	0.95418	0.989987
FBgn0011723	byn	0.0725247	0.17188	1.59167	0.914006	0.981686
FBgn0011725	twin	11.4209	0.00566682	0.054316	0.916907	0.982269
FBgn0011726	tsr	13.4569	-0.0510509	0.0510683	0.317475	0.758664
FBgn0011737	Wee1	9.33318	0.0453928	0.0599333	0.448817	0.837994
FBgn0011739	wts	11.6945	0.0566449	0.0611148	0.353999	0.784121
FBgn0011740	alpha-Man-IIa	11.2987	0.020148	0.052489	0.701088	0.933012
FBgn0011741	Arp6	10.0634	0.108838	0.0531379	0.040538	0.302221
FBgn0011742	Arp2	11.7116	0.0939519	0.0374849	0.012197	0.143656
FBgn0011745	Arp1	11.4161	0.031936	0.0547573	0.55974	0.885285
FBgn0011746	ana	6.94651	-0.224774	0.470385	0.632756	0.91498
FBgn0011747	Ank	13.1798	0.071855	0.048516	0.138591	0.54496
FBgn0011754	PhKgamma	10.7877	0.0203867	0.0682317	0.765103	0.949174
FBgn0011758	B-H1	5.64217	0.19239	0.241176	0.425035	0.827319
FBgn0011760	ctp	12.9628	-0.088605	0.0419713	0.0347649	0.27459
FBgn0011762	DNApol-alpha50	4.39106	0.315438	0.369546	0.393336	0.80857
FBgn0011763	Dp	11.1108	0.00407042	0.0433549	0.9252	0.983277
FBgn0011766	E2f1	12.1023	0.0343414	0.0783061	0.660985	0.921218
FBgn0011768	Fdh	10.7813	0.0397093	0.0629725	0.528314	0.871307
FBgn0011769	Fdx1	6.26688	0.00784883	0.174208	0.964064	0.992543
FBgn0011770	Gip	9.35999	-0.863575	0.12368	2.90344e-12	4.15013e-10
FBgn0011771	Hem	11.0148	0.0389668	0.0467849	0.404906	0.815659
FBgn0011774	Irbp	6.22112	0.190261	0.22321	0.394	0.808595
FBgn0011785	BRWD3	11.9101	0.0636425	0.0898717	0.478853	0.852181
FBgn0011787	mRpL12	8.98984	0.0113351	0.0893761	0.899079	0.978314
FBgn0011802	Gem3	8.22895	0.252497	0.0996746	0.0113022	0.138
FBgn0011817	nmo	12.2963	-0.055273	0.0685927	0.42035	0.825723
FBgn0011818	oaf	9.05032	-0.0416514	0.0645038	0.51846	0.866946
FBgn0011824	CG4038	8.89763	0.0237689	0.078857	0.763096	0.949
FBgn0011826	Pp2B-14D	10.6688	0.0930517	0.0524414	0.0759977	0.419944
FBgn0011828	Pxn	9.00897	0.0985094	0.118678	0.406508	0.816401
FBgn0011829	Ret	8.85156	-0.428216	0.0977764	1.18927e-05	0.000562014
FBgn0011836	Taf2	9.89163	-0.321365	0.0664335	1.31553e-06	7.50303e-05
FBgn0011837	Tis11	10.413	-0.0198769	0.0981359	0.839491	0.966496
FBgn0011880	tRNA:Ile-AAT-1-1	-1.24085	3.3588	2.76885	0.225103	NA
FBgn0011888	tRNA:Lys-CTT-1-3	-1.18072	-1.42512	3.35923	0.671391	NA
FBgn0011889	tRNA:Lys-CTT-1-2	-0.62678	-1.15658	1.93751	0.550545	NA
FBgn0011891	tRNA:Lys-CTT-1-1	-0.646679	0.818237	2.0877	0.695108	NA
FBgn0011916	tRNA:Met-CAT-1-2	1.1308	-0.171566	0.990082	0.862427	0.971973
FBgn0011959	tRNA:Arg-ACG-1-10	-0.847407	-0.958545	2.95431	0.745593	NA
FBgn0011987	tRNA:SeC-TCA-1-1	-0.639489	-0.209399	2.2122	0.924588	NA
FBgn0012034	AcCoAS	5.83462	0.0640167	0.195304	0.743079	0.946089
FBgn0012036	Aldh	9.67072	0.275232	0.140497	0.0501132	0.339135
FBgn0012037	Ance	9.58652	0.00491503	0.142549	0.972495	0.994338
FBgn0012042	AttA	3.20721	0.622502	0.583417	0.285975	0.733771
FBgn0012051	CalpA	10.9412	0.0173533	0.051438	0.735843	0.944298
FBgn0012058	Cdc27	10.5548	0.10579	0.0555513	0.056863	0.363158
FBgn0013263	Trl	8.16897	-0.291498	0.0822974	0.000397089	0.0110783
FBgn0013269	Fkbp39	10.1098	-0.0169899	0.0692977	0.806323	0.960449
FBgn0013272	Gp150	14.5461	-0.00305575	0.0316223	0.923018	0.982751
FBgn0013275	Hsp70Aa	2.78207	-0.315385	0.565638	0.577136	0.89158
FBgn0013276	Hsp70Ab	4.43972	0.234053	0.374534	0.532025	0.872862
FBgn0013277	Hsp70Ba	3.08963	-0.806046	0.473324	0.0885775	0.44775
FBgn0013278	Hsp70Bb	3.37057	-0.63029	0.450415	0.161707	0.585424
FBgn0013279	Hsp70Bc	2.5698	-0.968677	0.950324	0.308055	0.750364
FBgn0013303	Nca	9.85953	0.00577432	0.078579	0.941421	0.987601
FBgn0013305	Nmda1	9.99636	0.109597	0.0546658	0.0449787	0.317732
FBgn0013307	Odc1	1.44516	1.44394	1.05694	0.171893	0.602592
FBgn0013323	Ptth	1.88396	-0.927081	0.833155	0.265822	0.716631
FBgn0013325	RpL11	14.1246	0.0167402	0.0663567	0.800828	0.958147
FBgn0013334	Sap47	11.0945	0.0396472	0.0555618	0.475493	0.849634
FBgn0013342	nSyb	7.86538	-0.1168	0.129759	0.368053	0.792214
FBgn0013343	Syx1A	10.6195	-0.0123544	0.0873181	0.887485	0.975581
FBgn0013347	TfIIA-S	10.6725	0.0180293	0.0605805	0.766001	0.949174
FBgn0013348	TpnC41C	1.20508	-1.5098	1.42187	0.288305	0.736073
FBgn0013432	bcn92	8.85252	-0.119024	0.0857711	0.165231	0.592955
FBgn0013433	beat-Ia	1.86075	0.136768	0.70232	0.845599	0.967521
FBgn0013435	Cdc2rk	8.5652	3.17845e-05	0.0802456	0.999684	0.999857
FBgn0013467	igl	6.02387	-0.226072	0.2109	0.283749	0.731528
FBgn0013469	klu	11.6662	0.19994	0.0797828	0.0122086	0.143656
FBgn0013531	MED20	8.09447	0.037389	0.105027	0.721845	0.939908
FBgn0013548	l(2)dtl	7.73303	-0.118615	0.128092	0.354439	0.784328
FBgn0013563	Pex1	8.50395	-0.114115	0.0852512	0.180709	0.616275
FBgn0013576	mtd	11.6593	0.0221101	0.0420529	0.599049	0.900025
FBgn0013672	NA	13.7546	-0.110814	0.111173	0.318876	0.759451
FBgn0013673	NA	2.92419	0.0637313	0.612568	0.917138	0.982269
FBgn0013674	NA	16.4456	-0.0102063	0.0591705	0.863052	0.971973
FBgn0013675	NA	14.5261	-0.120835	0.0801632	0.131719	0.534637
FBgn0013676	NA	15.8783	-0.0412379	0.0673048	0.540072	0.877937
FBgn0013678	NA	15.074	0.0475893	0.119396	0.6902	0.92985
FBgn0013679	NA	13.5741	-0.0294192	0.110842	0.790689	0.954498
FBgn0013680	NA	6.85636	-0.489714	0.230476	0.0336038	0.268217
FBgn0013681	NA	12.807	0.051107	0.175627	0.771054	0.949174
FBgn0013683	NA	3.19228	0.0966456	0.642024	0.880344	0.975509
FBgn0013684	NA	12.7157	0.135638	0.225694	0.547854	0.881346
FBgn0013685	NA	2.68774	-1.26858	0.820886	0.122255	0.518076
FBgn0013686	NA	18.8692	-0.13448	0.0791911	0.0894744	0.450208
FBgn0013688	NA	8.07996	0.403243	0.279158	0.148599	0.560966
FBgn0013689	NA	0.0573613	0.642612	1.63191	0.693744	0.930817
FBgn0013690	NA	-0.921388	0.786785	2.71261	0.77178	NA
FBgn0013694	NA	-0.953094	1.80744	2.3551	0.442809	NA
FBgn0013698	NA	1.19762	1.98651	1.1929	0.0958577	0.463592
FBgn0013699	NA	2.72399	0.491433	0.725314	0.49806	0.857524
FBgn0013704	NA	0.0137475	0.66731	1.63711	0.683557	0.927212
FBgn0013710	NA	2.28657	2.67662	1.14025	0.0189058	0.191841
FBgn0013717	not	10.9331	0.0817975	0.0495564	0.0988218	0.467767
FBgn0013718	nuf	11.8596	0.0487837	0.0299768	0.103656	0.479478
FBgn0013720	pck	11.4906	0.0590429	0.0500042	0.237699	0.686644
FBgn0013725	phyl	4.02267	-0.111918	0.377892	0.767106	0.949174
FBgn0013726	pnut	11.6126	0.114531	0.0487528	0.0188127	0.191232
FBgn0013732	sced	9.26289	0.0438307	0.0773007	0.570704	0.889335
FBgn0013733	shot	13.5994	0.00362846	0.123659	0.976591	0.994891
FBgn0013746	alien	10.4128	0.0349234	0.0567027	0.537958	0.876458
FBgn0013749	Arf102F	10.839	-0.00258813	0.0793565	0.973982	0.994338
FBgn0013750	Arf51F	10.775	-0.0416015	0.0560338	0.457824	0.841377
FBgn0013751	Awh	5.32444	-0.343172	0.752053	0.648164	0.918409
FBgn0013753	Bgb	10.5792	-0.00677469	0.0596297	0.909545	0.980696
FBgn0013756	Mtor	12.4906	0.00375129	0.0807924	0.962967	0.992277
FBgn0013759	CASK	10.9157	0.0737153	0.0883451	0.404054	0.815518
FBgn0013762	Cdk5	8.53116	-0.0633914	0.102264	0.535337	0.875319
FBgn0013763	Idgf6	7.62249	0.00731915	0.319338	0.981714	0.997161
FBgn0013764	Chi	10.5079	0.0236873	0.0509813	0.642199	0.915941
FBgn0013765	cnn	10.0896	-0.0301581	0.0775771	0.697461	0.932041
FBgn0013770	Cp1	12.6624	0.0189944	0.0541134	0.72558	0.941596
FBgn0013771	Cyp6a9	2.64394	-1.60126	0.673803	0.0174799	0.18186
FBgn0013772	Cyp6a8	1.56806	2.82846	1.42241	0.0467562	0.325914
FBgn0013773	Cyp6a22	1.5789	-1.09178	0.852918	0.200526	0.637872
FBgn0013799	Deaf1	10.5998	-0.0367324	0.0416474	0.377785	0.800804
FBgn0013810	Dhc36C	5.5963	-1.18584	0.319076	0.000202026	0.00637345
FBgn0013811	Dhc62B	5.47355	-0.0233065	0.233236	0.920403	0.982634
FBgn0013812	Dhc93AB	7.90983	0.013314	0.155136	0.931608	0.985159
FBgn0013813	Dhc98D	4.15358	-0.539545	0.41237	0.190738	0.627675
FBgn0013949	Elal	3.29434	0.486365	0.47706	0.307963	0.750364
FBgn0013954	Fkbp12	12.6628	-0.00377489	0.055538	0.94581	0.987749
FBgn0013972	Gycalpha99B	3.49329	-0.637839	0.454164	0.160192	0.583237
FBgn0013973	Gycbeta100B	4.08591	1.13988	0.605747	0.0598672	0.370186
FBgn0013981	His4r	13.6222	-0.00717376	0.0721353	0.920782	0.982634
FBgn0013983	imd	9.03975	-0.0140867	0.0733303	0.847664	0.968059
FBgn0013987	MAPk-Ak2	11.7056	0.0273014	0.0389641	0.483502	0.852291
FBgn0013995	Calx	3.05145	-0.766448	0.526387	0.145378	0.555241
FBgn0013997	Nrx-IV	13.4515	-0.0423049	0.053226	0.426721	0.827319
FBgn0014000	Hf	3.74964	-0.667854	0.364308	0.0667711	0.391431
FBgn0014006	Ask1	10.9726	0.0195197	0.0497916	0.695037	0.930947
FBgn0014007	Ptp69D	11.0574	-0.0112584	0.0583242	0.846935	0.967723
FBgn0014009	Rab2	10.9393	-0.0507229	0.0493008	0.303552	0.746977
FBgn0014010	Rab5	12.2747	0.0213793	0.0416698	0.607906	0.904614
FBgn0014011	Rac2	11.3728	0.0295691	0.0631439	0.639583	0.915681
FBgn0014018	Rel	10.1545	0.0985984	0.0495	0.0463837	0.323903
FBgn0014019	Rh5	4.81416	0.649524	0.280408	0.0205389	0.202555
FBgn0014020	Rho1	13.2693	-0.107027	0.0441412	0.0153233	0.167723
FBgn0014022	Rlb1	7.85961	0.144804	0.115166	0.208628	0.646722
FBgn0014023	mRpL47	8.44886	-0.000206465	0.095766	0.99828	0.99938
FBgn0014024	Rnp4F	10.5351	0.00848171	0.0446786	0.849436	0.968401
FBgn0014026	RpL7A	15.0033	-0.0689834	0.0487803	0.157313	0.578905
FBgn0014028	SdhB	10.1394	0.0694525	0.0679632	0.306822	0.749132
FBgn0014029	2024-09-02	10.9174	0.021215	0.0408991	0.603958	0.902181
FBgn0014031	Spat	4.79921	0.00206931	0.377072	0.995621	0.998967
FBgn0014032	Sptr	8.54434	-0.200942	0.079057	0.0110303	0.135572
FBgn0014033	Sr-CI	7.06226	-0.252201	0.173733	0.146597	0.557224
FBgn0014037	Su(Tpl)	12.3038	0.00163334	0.0787343	0.983449	0.997161
FBgn0014073	Tie	9.78375	-0.934136	0.147085	2.139e-10	2.38129e-08
FBgn0014075	Uggt	12.3383	0.00910263	0.0458319	0.842569	0.967521
FBgn0014076	Vm32E	-0.694159	-0.677219	2.16546	0.75448	NA
FBgn0014092	CG4278	8.61034	0.136194	0.0948223	0.150915	0.565832
FBgn0014127	barr	10.6061	0.016073	0.049206	0.743935	0.946294
FBgn0014133	bif	13.0594	0.0356847	0.0606561	0.556322	0.88514
FBgn0014135	bnl	6.43588	-0.198436	0.281977	0.481601	0.852181
FBgn0014141	cher	12.0532	-0.351913	0.11556	0.00232461	0.0430629
FBgn0014143	croc	1.71505	-2.48602	1.73707	NA	NA
FBgn0014163	fax	15.1835	-0.0851309	0.0469888	0.0700281	0.402375
FBgn0014179	gcm	5.0594	-1.00153	0.420963	0.0173525	0.181413
FBgn0014184	Oda	13.9522	-0.00856003	0.0512919	0.867458	0.972823
FBgn0014189	Hel25E	12.0814	-0.074943	0.0482039	0.120016	0.513125
FBgn0014269	prod	9.72392	0.146961	0.0653773	0.0245835	0.224293
FBgn0014340	mof	7.85	0.0208157	0.123191	0.865819	0.972578
FBgn0014342	mia	6.74838	-0.0785518	0.149707	0.59979	0.900684
FBgn0014343	mirr	11.223	-0.0855075	0.135052	0.52664	0.870492
FBgn0014366	noi	9.80873	0.0653429	0.0683544	0.339101	0.775853
FBgn0014380	RhoL	9.1137	0.425182	0.102451	3.32307e-05	0.001394
FBgn0014388	sty	11.848	0.0585922	0.0686505	0.39339	0.80857
FBgn0014391	sun	10.6856	-0.0548938	0.0965928	0.569831	0.889335
FBgn0014395	tilB	3.78534	0.123873	0.37203	0.73916	0.944862
FBgn0014396	tim	3.66934	-0.273009	0.433005	0.528368	0.871307
FBgn0014411	Vps26	10.9739	-0.0283826	0.0391146	0.468067	0.845211
FBgn0014417	CG13397	5.71491	-0.099336	0.17598	0.572433	0.889559
FBgn0014427	CG11899	11.4729	0.202484	0.0526871	0.000121468	0.00416082
FBgn0014454	Acp1	2.0924	0.491023	0.726694	0.499234	0.858159
FBgn0014455	Ahcy	10.2599	0.0632311	0.054051	0.242065	0.689963
FBgn0014464	Cp7Fa	1.13662	-1.09797	1.08039	0.3095	0.752182
FBgn0014465	Cp7Fb	-1.26637	0	2.93651	1	NA
FBgn0014469	Cyp4e2	9.7685	-0.325651	0.0661888	8.65299e-07	5.0855e-05
FBgn0014850	Eig71Ej	1.73543	-1.67159	1.21475	0.168795	0.598805
FBgn0014857	His3.3A	10.6988	0.0828073	0.0665577	0.213447	0.654818
FBgn0014859	Hr38	2.83522	-0.228171	0.651358	0.726113	0.941861
FBgn0014861	Mcm2	7.54488	0.11452	0.126943	0.366985	0.791532
FBgn0014863	Mlp84B	4.55615	-0.117568	0.33052	0.722061	0.93996
FBgn0014865	Mtk	-0.528169	-1.36038	2.11094	0.519287	NA
FBgn0014868	Ost48	12.0818	-0.0101487	0.0424813	0.811186	0.96149
FBgn0014869	Pglym78	9.18404	0.230239	0.0825309	0.00527522	0.0794739
FBgn0014870	Psi	12.3564	-0.00744187	0.059127	0.899841	0.978314
FBgn0014877	Roe1	8.1245	0.0135446	0.101492	0.893835	0.977086
FBgn0014879	Set	11.2649	0.12983	0.052962	0.014231	0.160591
FBgn0014903	CG14630	0.833403	-3.37671	1.45532	0.0203273	0.201497
FBgn0014906	Hydr2	9.53144	0.0648924	0.0680523	0.340303	0.776063
FBgn0014930	CG2846	8.44884	-0.0407932	0.0895383	0.648681	0.918409
FBgn0014931	CG2678	3.02866	-0.110294	0.498287	0.824823	0.963747
FBgn0014949	btn	0.76574	-1.08702	1.04753	0.299408	0.745119
FBgn0015000	betaggt-I	8.90502	0.236374	0.0730603	0.001215	0.0266584
FBgn0015001	iotaTry	-0.505643	-0.345723	1.97731	0.861201	NA
FBgn0015010	Ag5r	4.97027	0.202397	0.410694	0.622141	0.912253
FBgn0015011	AhcyL2	5.22808	0.894987	0.319698	0.00511861	0.0778533
FBgn0015019	CCT3	11.7738	-0.0320896	0.0472672	0.497202	0.857385
FBgn0015024	CkIalpha	13.2731	-0.0107164	0.0364426	0.76871	0.949174
FBgn0015025	CkIIalpha-i1	6.89039	0.162831	0.151865	0.283627	0.731528
FBgn0015031	cype	10.1232	-0.168168	0.107665	0.118299	0.508935
FBgn0015032	Cyp4c3	0.482657	0.782628	1.21496	0.519473	0.867425
FBgn0015033	Cyp4d8	4.9673	0.585559	0.270923	0.0306686	0.256066
FBgn0015034	Cyp4e1	4.54269	0.273362	0.356526	0.443238	0.833667
FBgn0015035	Cyp4e3	3.37369	0.247857	0.465274	0.594234	0.898165
FBgn0015036	Cyp4ae1	4.46053	0.0742734	0.278732	0.789878	0.9543
FBgn0015037	Cyp4p1	0.849425	-0.668546	1.77423	0.706315	0.935237
FBgn0015038	Cyp9b1	-1.12704	0.786783	3.02574	0.794841	NA
FBgn0015039	Cyp9b2	6.51719	-0.197863	0.180351	0.272598	0.723421
FBgn0015040	Cyp9c1	8.6054	-0.274874	0.0959318	0.00416608	0.0663478
FBgn0015075	Ddx1	9.97363	0.0245916	0.0627288	0.695036	0.930947
FBgn0015218	eIF4E1	12.6211	-0.0720638	0.039436	0.067646	0.393791
FBgn0015221	Fer2LCH	12.7734	-0.0333896	0.0575946	0.562094	0.88652
FBgn0015222	Fer1HCH	12.8474	-0.0870313	0.0531877	0.101776	0.475147
FBgn0015229	glec	13.3467	0.0462377	0.051714	0.371266	0.795532
FBgn0015239	Hr78	12.4679	0.0106059	0.038369	0.782226	0.951491
FBgn0015240	Hr96	8.40743	0.0925925	0.0962217	0.335908	0.772267
FBgn0015245	Hsp60A	11.5578	0.0483541	0.0353953	0.171902	0.602592
FBgn0015247	Diap2	9.74601	0.108282	0.0606225	0.0740724	0.414505
FBgn0015268	Nap1	11.7829	-0.146307	0.0499525	0.0034014	0.0573237
FBgn0015269	Nf1	10.9236	0.0485047	0.105543	0.645822	0.917162
FBgn0015270	Orc2	4.85277	-0.0866262	0.313231	0.78212	0.951491
FBgn0015271	Orc5	6.33038	-0.617364	0.178698	0.000550735	0.0142331
FBgn0015277	Pi3K59F	8.81439	0.0164721	0.0798294	0.836524	0.966496
FBgn0015278	Pi3K68D	11.1908	-0.0537315	0.0747745	0.4724	0.847913
FBgn0015279	Pi3K92E	10.869	0.019699	0.046839	0.674071	0.92433
FBgn0015282	Rpt2	11.6953	-0.0190451	0.0423899	0.653226	0.91952
FBgn0015283	Rpn10	11.3261	0.00588934	0.0425149	0.889826	0.97607
FBgn0015286	Rala	10.5042	-0.0773084	0.0573986	0.178023	0.611616
FBgn0015288	RpL22	14.2371	0.0786714	0.0657195	0.231276	0.678934
FBgn0015295	Shark	9.82703	0.059515	0.0587563	0.311102	0.752872
FBgn0015296	Shc	9.59174	-0.0125132	0.0525725	0.811867	0.96149
FBgn0015298	Srp19	9.15904	0.00766405	0.0878275	0.930463	0.984717
FBgn0015299	Ssb-c31a	7.31377	-0.0576073	0.136688	0.673426	0.92433
FBgn0015316	Try29F	5.28614	0.0568569	0.244344	0.816001	0.961986
FBgn0015320	Ubc2	11.1948	0.0413575	0.0388647	0.287266	0.735182
FBgn0015321	Ubc4	10.3929	0.0743737	0.0501735	0.138253	0.544452
FBgn0015331	abs	10.1265	0.010783	0.0748553	0.885459	0.975573
FBgn0015336	CG15865	1.95261	0.577355	0.847124	0.495525	0.85682
FBgn0015338	CG5861	9.42313	-0.0452581	0.0775315	0.559397	0.885285
FBgn0015351	CG14906	5.85698	-0.0593217	0.224217	0.791338	0.954984
FBgn0015359	CG2034	8.59124	-0.141822	0.0793125	0.0737541	0.414093
FBgn0015360	oxt	8.47056	-0.0247681	0.0792614	0.754671	0.947242
FBgn0015371	chn	9.31639	0.0400995	0.0972785	0.680183	0.925727
FBgn0015372	RabX1	8.46832	0.0775735	0.0838685	0.354996	0.784328
FBgn0015376	cutlet	6.13144	-0.121453	0.190601	0.523987	0.868985
FBgn0015379	dod	9.96485	-0.0142071	0.0663489	0.830448	0.96516
FBgn0015380	drl	12.7344	-0.0608615	0.0449485	0.175728	0.607853
FBgn0015391	glu	9.30816	0.287298	0.0873808	0.00100944	0.0230065
FBgn0015396	jumu	11.0073	0.219813	0.0906863	0.0153555	0.167723
FBgn0015399	kek1	12.0816	0.111315	0.0742824	0.133994	0.5383
FBgn0015400	kek2	6.56778	-0.0549513	0.216486	0.799624	0.957977
FBgn0015402	ksr	10.1972	0.0505827	0.0552509	0.359924	0.787169
FBgn0015477	Rme-8	11.4606	0.0620461	0.079189	0.433322	0.829364
FBgn0015509	Cul1	12.6144	-0.128949	0.0316031	4.49835e-05	0.00181042
FBgn0015513	mbc	11.0841	0.066805	0.0780028	0.391753	0.80857
FBgn0015519	nAChRalpha3	1.91213	0.6291	0.747263	0.39986	0.811719
FBgn0015520	nonA-l	9.61431	0.126449	0.0552545	0.0221091	0.210934
FBgn0015521	RpS21	13.3077	-0.0432285	0.0963436	0.653654	0.919675
FBgn0015522	olf186-M	6.07642	-0.102852	0.159855	0.51996	0.867425
FBgn0015524	otp	0.406507	-1.25389	1.58036	0.427535	0.827758
FBgn0015527	peng	9.65159	-0.0041028	0.0569344	0.942553	0.987601
FBgn0015543	snoRNA:Me28S-A1322	7.0336	-0.163723	0.131585	0.213411	0.654818
FBgn0015544	spag	7.88808	0.152769	0.0922961	0.097883	0.466674
FBgn0015546	spel1	9.18846	0.0486389	0.0753184	0.518424	0.866946
FBgn0015550	tap	-0.697578	0.0654334	1.93435	0.973015	NA
FBgn0015553	tos	5.27407	0.269839	0.241531	0.263909	0.714475
FBgn0015558	tty	7.69379	-0.303621	0.143604	0.0344905	0.27314
FBgn0015561	unpg	0.88684	-0.779745	1.33482	0.559114	0.885285
FBgn0015568	alpha-Est1	5.7534	-0.154035	0.20438	0.451047	0.838945
FBgn0015569	alpha-Est10	6.26884	-0.405743	0.448605	0.365754	0.790352
FBgn0015570	alpha-Est2	0.489579	-0.955321	1.4376	0.506355	0.86151
FBgn0015571	alpha-Est3	7.94433	0.0344663	0.115746	0.765875	0.949174
FBgn0015572	alpha-Est4	7.24428	-0.165709	0.158559	0.29598	0.742471
FBgn0015575	alpha-Est7	4.11614	0.321416	0.458961	0.483731	0.852291
FBgn0015576	alpha-Est8	2.61915	-0.511643	0.60588	0.39841	0.811241
FBgn0015577	alpha-Est9	3.1987	-0.294786	0.462706	0.524065	0.868985
FBgn0015582	dare	8.63327	-0.117389	0.0912429	0.198251	0.635462
FBgn0015589	Apc	10.7964	0.0665901	0.0944595	0.480836	0.852181
FBgn0015591	AstA	0.975364	-0.812763	1.54289	0.598347	0.900025
FBgn0015600	toc	11.2329	0.0293851	0.0646807	0.649605	0.918779
FBgn0015602	BEAF-32	9.92709	0.0185429	0.061702	0.763778	0.949
FBgn0015609	CadN	13.2715	0.12505	0.11761	0.287663	0.735385
FBgn0015614	CanB2	11.2586	-0.0161471	0.051018	0.751624	0.947186
FBgn0015615	SMC3	10.6553	0.034322	0.0437176	0.432404	0.82905
FBgn0015618	Cdk8	8.39293	-0.1032	0.0859675	0.229964	0.67817
FBgn0015621	Clp	7.50489	-0.0873955	0.128996	0.498087	0.857524
FBgn0015622	Cnx99A	12.7447	-0.0521319	0.0396129	0.188163	0.624586
FBgn0015623	Cpr	12.0901	-0.0445255	0.0412695	0.280634	0.729496
FBgn0015625	CycB3	8.49178	0.33248	0.133568	0.0128026	0.148015
FBgn0015663	Ugt36A1	6.92963	0.35256	0.144932	0.0149911	0.165301
FBgn0015664	Dref	9.98467	-0.0116519	0.0505138	0.817574	0.961986
FBgn0015714	Cyp6a17	7.57279	0.365034	0.165538	0.0274448	0.239997
FBgn0015721	ktub	4.69444	0.361671	0.302538	0.23191	0.680104
FBgn0015737	Hmu	12.8723	0.000463806	0.044761	0.991733	0.998113
FBgn0015754	Lis-1	12.3143	-0.0935917	0.0405285	0.020928	0.204304
FBgn0015756	RpL9	14.0306	0.0845144	0.0677017	0.211908	0.652636
FBgn0015765	p38a	8.04201	0.0653847	0.102456	0.523362	0.868985
FBgn0015766	Msr-110	12.8519	0.0980058	0.0856799	0.252682	0.701439
FBgn0015772	Nak	10.7309	0.000444984	0.0683477	0.994805	0.998967
FBgn0015773	NetA	12.6469	0.027128	0.068211	0.690845	0.930033
FBgn0015774	NetB	11.7326	-0.0796849	0.0980572	0.416427	0.824592
FBgn0015776	nrv1	10.806	-0.107419	0.0583493	0.0656278	0.38708
FBgn0015777	nrv2	11.7745	-0.0969143	0.0534045	0.069567	0.40052
FBgn0015778	rin	13.7113	0.0439431	0.0728554	0.546406	0.880461
FBgn0015781	P5cr	8.44593	-0.0151796	0.111444	0.891656	0.976828
FBgn0015789	Rab10	10.527	-0.140807	0.0466345	0.00253305	0.0459256
FBgn0015790	Rab11	12.634	-0.0707601	0.0478139	0.138898	0.545228
FBgn0015791	Rab14	9.91895	0.0956614	0.0484186	0.0481871	0.33126
FBgn0015793	Rab19	8.65196	-0.0384899	0.0938724	0.681789	0.926714
FBgn0015794	Rab18	9.02261	0.0307222	0.0891602	0.730415	0.942739
FBgn0015795	Rab7	11.8539	0.0203625	0.0431601	0.637077	0.915498
FBgn0015797	Rab6	11.8126	-0.041032	0.0465332	0.377895	0.800892
FBgn0015799	Rbf	10.2172	0.0073449	0.0517505	0.887136	0.975581
FBgn0015801	Reg-5	8.10568	0.234519	0.122812	0.0561872	0.360607
FBgn0015803	RtGEF	10.6422	0.167095	0.0475315	0.000438998	0.0119313
FBgn0015805	HDAC1	11.6368	0.0506156	0.0431316	0.240589	0.689159
FBgn0015808	ScpX	10.6878	-0.0093826	0.041443	0.820892	0.963052
FBgn0015818	Spx	8.72896	0.0297914	0.0888666	0.737446	0.944477
FBgn0015828	TfIIEalpha	8.66629	0.0290348	0.0840771	0.729842	0.942739
FBgn0015829	TfIIEbeta	9.13833	-0.00861943	0.0750249	0.908534	0.980327
FBgn0015831	Rtnl2	0.86238	-1.68698	1.39459	0.226409	0.674132
FBgn0015834	eIF3i	12.3716	0.0969449	0.0478867	0.0429225	0.311992
FBgn0015838	Vang	12.2133	-0.0117047	0.0409975	0.775262	0.950122
FBgn0015872	Drip	4.27552	-0.191914	0.330831	0.561848	0.88652
FBgn0015903	apt	7.20796	0.75779	0.146996	2.53397e-07	1.65753e-05
FBgn0015904	ara	11.3883	-0.0362956	0.0804109	0.651718	0.919187
FBgn0015905	ast	8.34719	0.122813	0.0850444	0.148711	0.561203
FBgn0015919	caup	11.3693	-0.162252	0.112588	0.149554	0.56303
FBgn0015924	crq	9.82312	0.0640293	0.0656743	0.329584	0.769541
FBgn0015925	csul	8.01537	0.000609146	0.092252	0.994732	0.998967
FBgn0015926	dah	6.58172	-0.0412662	0.203865	0.839589	0.966496
FBgn0015929	dpa	7.89907	-0.0552891	0.122261	0.65111	0.919187
FBgn0015946	grim	2.05549	-0.277757	0.816773	0.733807	0.943488
FBgn0015949	hrg	12.1326	-0.0244731	0.0441809	0.579628	0.892876
FBgn0016013	Faa	7.73017	-0.503683	0.127363	7.66257e-05	0.00278985
FBgn0016031	lama	1.62795	0.762486	0.827459	0.3568	0.785758
FBgn0016032	lbm	4.20228	0.0254189	0.342096	0.940769	0.987601
FBgn0016034	mael	3.93095	0.215033	0.391574	0.582902	0.893164
FBgn0016036	mei-P22	2.35204	1.26533	0.874086	0.147727	0.558806
FBgn0016038	Vsp37A	10.0383	0.0959855	0.0573407	0.0941402	0.462041
FBgn0016041	Tom40	9.5113	0.0691592	0.066384	0.297502	0.74306
FBgn0016047	nompA	11.251	-0.23446	0.109915	0.032916	0.265947
FBgn0016053	pgc	3.55759	-0.213576	0.37204	0.565923	0.887367
FBgn0016054	phr6-4	6.31191	0.0401987	0.181567	0.824782	0.963747
FBgn0016059	Sema1b	13.7242	0.0500703	0.0374647	0.181397	0.617891
FBgn0016061	side	6.50477	-0.682058	0.259238	0.00851328	0.11395
FBgn0016070	smg	10.0062	-0.0838036	0.0715552	0.241528	0.689282
FBgn0016075	vkg	8.3912	0.170812	0.147858	0.247993	0.695557
FBgn0016076	vri	9.12009	0.506814	0.284378	0.0747189	0.416112
FBgn0016078	wun	11.1035	-0.206676	0.0723688	0.00429187	0.0679771
FBgn0016081	fry	11.8962	0.0644599	0.0991568	0.51564	0.86587
FBgn0016119	ATPsynCF6	10.9192	-0.0811277	0.0785623	0.301765	0.745245
FBgn0016120	ATPsynD	11.0761	-0.0189485	0.0675885	0.779209	0.950886
FBgn0016122	Acer	6.73535	-0.045946	0.144816	0.751037	0.947186
FBgn0016123	Alp4	-0.534221	-2.66155	1.67591	0.11226	NA
FBgn0016126	CaMKI	12.3691	0.00669635	0.0344054	0.845682	0.967521
FBgn0016131	Cdk4	10.6293	-0.0241196	0.0576493	0.675666	0.924549
FBgn0016641	PTP-ER	10.0635	0.0364964	0.0600922	0.543626	0.880189
FBgn0016650	Lgr1	1.99284	0.96426	0.916052	0.292513	0.73958
FBgn0016660	H15	5.00791	-0.634164	0.756237	0.401706	0.813053
FBgn0016672	Ipp	8.82555	0.0474469	0.0901867	0.598821	0.900025
FBgn0016675	Lectin-galC1	3.50791	-5.13565	2.46969	0.0375743	0.288294
FBgn0016684	NaPi-T	5.97923	0.0955265	0.202932	0.637832	0.915498
FBgn0016685	Nlp	11.9858	0.086733	0.0604484	0.151336	0.567195
FBgn0016687	Nurf-38	11.1911	0.0379024	0.0497526	0.446169	0.835631
FBgn0016691	ATPsynO	11.3971	-0.0196972	0.0667782	0.768022	0.949174
FBgn0016693	Past1	11.0924	0.00277515	0.0418492	0.947129	0.988162
FBgn0016694	Pdp1	5.97746	-0.270829	0.205657	0.187873	0.624018
FBgn0016696	Pitslre	12.3253	0.0119108	0.0350803	0.734212	0.943488
FBgn0016697	Prosalpha5	10.4833	-0.0351834	0.0484325	0.467568	0.844803
FBgn0016698	Ptpa	8.20129	0.0606628	0.0853529	0.477252	0.851143
FBgn0016701	Rab4	10.4806	0.0193199	0.0594739	0.745297	0.946294
FBgn0016715	Reg-2	4.56192	0.0390763	0.377557	0.917568	0.982269
FBgn0016726	RpL29	13.77	0.1554	0.10728	0.147463	0.558477
FBgn0016754	sba	11.1343	0.104837	0.0881987	0.234578	0.682226
FBgn0016756	Usp47	11.9309	0.0578472	0.0550666	0.29349	0.740472
FBgn0016762	angel	7.70081	0.139485	0.104043	0.180033	0.614875
FBgn0016794	dos	10.6128	0.0434851	0.0618114	0.481736	0.852181
FBgn0016797	fz2	13.4871	0.0206832	0.0617751	0.737766	0.944477
FBgn0016917	Stat92E	11.6089	0.0569713	0.0549502	0.299838	0.745119
FBgn0016919	nompB	5.58364	0.353668	0.224335	0.114906	0.50157
FBgn0016920	nompC	3.70487	-0.222449	0.410364	0.587766	0.895415
FBgn0016926	Pino	10.8579	0.0601296	0.0568807	0.290458	0.737644
FBgn0016930	Dyrk2	12.8276	0.0472306	0.0549685	0.390213	0.80857
FBgn0016970	l(2)k10201	6.39402	-0.187144	0.20323	0.357131	0.785758
FBgn0016974	swaPsi	0.888748	0.924379	1.16129	0.426035	0.827319
FBgn0016977	spen	13.8869	0.0744482	0.17723	0.674438	0.924359
FBgn0016978	snRNP-U1-70K	11.2861	0.00901252	0.0392365	0.818327	0.962571
FBgn0016983	smid	10.6583	-0.0479091	0.0554645	0.387709	0.80794
FBgn0016984	sktl	10.8387	0.0928273	0.0519281	0.0738384	0.414093
FBgn0017414	cag	9.01643	0.0537991	0.0718264	0.453848	0.839401
FBgn0017418	ari-1	10.4804	-0.0188965	0.0542539	0.727617	0.942272
FBgn0017424	asRNA:CR11538	6.42599	-0.198567	0.361596	0.582909	0.893164
FBgn0017429	CG5989	7.90085	0.47275	0.0887951	1.01479e-07	7.20812e-06
FBgn0017430	Nelf-E	8.54101	0.123982	0.0840188	0.14004	0.546788
FBgn0017448	CG2187	-0.970375	0.762051	2.21701	0.73105	NA
FBgn0017457	U2af38	10.0088	-0.000262714	0.0572206	0.996337	0.998991
FBgn0017482	T3dh	7.29533	0.0842743	0.125409	0.501585	0.859025
FBgn0017545	RpS3A	14.9442	0.0553606	0.057925	0.33921	0.775853
FBgn0017550	Rga	11.8278	0.0171395	0.0383516	0.654943	0.919751
FBgn0017551	Rca1	8.99198	0.127086	0.0868264	0.143282	0.552235
FBgn0017558	Pdk	9.52363	0.0531742	0.0669869	0.427312	0.827511
FBgn0017561	Ork1	0.642788	-1.23399	1.36952	0.367566	0.792197
FBgn0017566	ND-75	11.0341	0.0591094	0.0380392	0.120206	0.513561
FBgn0017567	ND-23	9.43816	0.0540923	0.0844693	0.521927	0.868353
FBgn0017572	Mo25	11.3838	0.0410076	0.0449775	0.361908	0.788487
FBgn0017577	Mcm5	6.73979	-0.411033	0.199805	0.0396701	0.298635
FBgn0017578	Max	9.61701	0.00450096	0.0801436	0.955213	0.990063
FBgn0017579	RpL14	14.3701	0.138017	0.069266	0.0463092	0.323903
FBgn0017581	Lk6	13.7647	0.0333862	0.0714521	0.640319	0.915713
FBgn0017590	klg	5.73254	-0.0776418	0.227179	0.732528	0.943083
FBgn0019624	COX5A	10.6094	-0.026199	0.0630421	0.677718	0.924982
FBgn0019637	Atu	10.1976	0.014792	0.0476678	0.756322	0.94738
FBgn0019643	AANAT1	5.36647	-0.324482	0.244713	0.18485	0.619537
FBgn0019644	ATPsynB	11.1587	-0.0977585	0.0663363	0.140568	0.548037
FBgn0019650	toy	2.7744	0.395007	1.41189	0.779653	0.950886
FBgn0019660	lncRNA:roX2	1.10335	-5.1318	3.43758	NA	NA
FBgn0019661	lncRNA:roX1	6.85591	-1.74921	0.663365	NA	NA
FBgn0019662	qm	9.72224	-0.124963	0.0605008	0.038878	0.294973
FBgn0019686	lok	9.39057	-0.116363	0.0680699	0.0873649	0.445011
FBgn0019809	gcm2	4.19998	-0.526412	0.523128	0.314282	0.756656
FBgn0019830	colt	11.0521	0.0677798	0.078157	0.385818	0.806609
FBgn0019890	Smg5	12.35	0.0217045	0.0490177	0.657919	0.920647
FBgn0019925	Surf4	11.4806	-0.0877085	0.0609189	0.149936	0.563439
FBgn0019932	SamDC	8.65649	-0.153494	0.0745477	0.0394943	0.298087
FBgn0019936	RpS20	13.8722	0.0665672	0.0644594	0.301744	0.745245
FBgn0019938	RpI1	9.25677	-0.0329889	0.0786415	0.674862	0.924513
FBgn0019940	Rh6	1.22732	0.455451	1.02278	0.656098	0.920515
FBgn0019949	Cdk9	9.0985	0.0457802	0.0656023	0.485275	0.852649
FBgn0019952	Orct	7.9503	0.124102	0.104518	0.23508	0.682986
FBgn0019957	ND-42	10.4633	-0.0460486	0.059861	0.441739	0.833653
FBgn0019960	Mitofilin	10.6813	-0.00691731	0.0482325	0.885962	0.975573
FBgn0019968	Khc-73	11.8324	0.00893869	0.0668428	0.893618	0.977042
FBgn0019972	Drice	10.4556	0.0200174	0.0439724	0.648946	0.918409
FBgn0019982	Gs1l	7.99739	0.0779052	0.127727	0.541905	0.879122
FBgn0019985	mGluR	9.01182	-0.804174	0.118132	9.93851e-12	1.35374e-09
FBgn0019990	Gcn2	10.6957	0.0137331	0.0710128	0.846654	0.967723
FBgn0020018	Ppox	7.72412	0.133996	0.0991088	0.176372	0.60938
FBgn0020224	Cbl	10.7904	0.0195433	0.0541347	0.71809	0.93891
FBgn0020235	ATPsyngamma	11.6737	0.0641672	0.072146	0.373784	0.798172
FBgn0020236	ATPCL	12.1814	0.0874838	0.0384382	0.0228484	0.214897
FBgn0020238	14-3-3epsilon	14.7122	-0.0488324	0.0292708	0.0952572	0.463592
FBgn0020248	stet	4.56911	-0.493463	0.301953	0.102209	0.475741
FBgn0020249	stck	10.0864	0.00896405	0.0561786	0.873225	0.974909
FBgn0020251	sfl	10.2577	0.0218618	0.0624113	0.726123	0.941861
FBgn0020255	Ran	12.1316	-0.0063219	0.0389894	0.871192	0.973909
FBgn0020257	Ppa	12.0552	0.0416478	0.0619188	0.501189	0.858906
FBgn0020258	ppk	2.77195	0.415203	0.648895	0.522262	0.868582
FBgn0020261	pcm	10.6762	0.089261	0.0648458	0.168664	0.598647
FBgn0020269	mspo	6.58337	-0.068093	0.160099	0.670604	0.922997
FBgn0020270	mre11	8.46464	0.38263	0.118927	0.00129379	0.0279991
FBgn0020272	mst	6.63951	0.245464	0.162311	0.130455	0.533337
FBgn0020277	lush	-1.16609	1.24896	2.66138	0.638862	NA
FBgn0020278	loco	10.7613	-0.0143478	0.0578973	0.804277	0.959596
FBgn0020279	lig	13.9675	0.0275219	0.0735554	0.708281	0.93595
FBgn0020294	ko	11.3842	-0.0575834	0.0584503	0.324541	0.764428
FBgn0020299	stumps	7.44862	-0.305817	0.228441	0.180663	0.616275
FBgn0020300	geko	9.20428	-0.0458949	0.0953761	0.630375	0.91498
FBgn0020304	drongo	11.7896	-0.0507601	0.0651647	0.436009	0.830231
FBgn0020305	dbe	8.94177	0.00798413	0.0901971	0.929464	0.984282
FBgn0020306	dom	12.9023	0.0909035	0.0941752	0.334415	0.772083
FBgn0020307	dve	8.47174	0.346555	0.148326	0.0194679	0.195903
FBgn0020309	crol	13.7329	0.0252668	0.0729247	0.728983	0.942509
FBgn0020312	Tmtc3	10.6836	-0.0653512	0.0501068	0.192152	0.62899
FBgn0020369	Rpt6	11.7105	-0.041819	0.0434088	0.33536	0.772267
FBgn0020370	TppII	12.1331	-0.0201852	0.0420589	0.63128	0.91498
FBgn0020372	TM4SF	6.09399	-0.53209	0.174569	0.00230352	0.0427406
FBgn0020376	Sr-CIII	-0.870899	1.90194	2.35864	0.420027	NA
FBgn0020378	Sp1	7.92586	0.17511	0.419891	0.676652	0.924586
FBgn0020379	Rfx	8.71516	0.0314051	0.0947153	0.740211	0.945194
FBgn0020381	Dredd	10.421	0.163515	0.0605534	0.00692686	0.0975659
FBgn0020385	pug	11.2939	0.022027	0.0569917	0.69913	0.932206
FBgn0020386	Pdk1	11.7969	-0.0580221	0.0689239	0.399884	0.811719
FBgn0020388	Gcn5	10.2699	0.149255	0.0581228	0.0102311	0.128897
FBgn0020389	Papss	11.4845	-0.0609773	0.106812	0.568077	0.888691
FBgn0020391	Nrk	7.21585	0.0956446	0.114828	0.40488	0.815659
FBgn0020392	Nmt	9.96795	-0.142413	0.0520521	0.00621984	0.0899042
FBgn0020399	Mst89B	1.67761	-0.287572	0.854179	0.736369	0.944298
FBgn0020407	asun	7.7021	-0.0700839	0.0976225	0.472814	0.848194
FBgn0020412	JIL-1	10.713	-0.0209253	0.0757826	0.782454	0.951491
FBgn0020414	Idgf3	5.04751	-0.284307	0.292167	0.330504	0.76966
FBgn0020415	Idgf2	5.37241	0.353128	0.275378	0.199725	0.637576
FBgn0020416	Idgf1	1.82033	-0.940941	0.731145	0.198115	0.635462
FBgn0020429	GluRIIB	1.96104	-0.730378	0.805475	0.36453	0.78926
FBgn0020440	Fak	10.5989	0.0891363	0.0475501	0.0608509	0.373498
FBgn0020443	eRF3	12.3053	0.0470903	0.0368592	0.201401	0.638854
FBgn0020445	E23	7.93413	0.17328	0.104208	0.0963473	0.464215
FBgn0020493	Dad	11.4517	0.038719	0.0475982	0.415958	0.823996
FBgn0020496	CtBP	13.6811	0.0100419	0.0364243	0.782785	0.951491
FBgn0020497	emb	12.0313	0.0203013	0.0473841	0.66833	0.922471
FBgn0020503	CLIP-190	10.6723	0.0633127	0.0719815	0.379093	0.801276
FBgn0020510	Abi	10.742	0.0506869	0.0370482	0.17127	0.602359
FBgn0020513	Paics	10.7632	0.187987	0.0552137	0.000662312	0.0165621
FBgn0020518	snoRNA:Me28S-G764	-0.00972575	2.13281	1.63197	0.191247	0.627979
FBgn0020521	pio	14.901	-0.196304	0.0667852	0.00328925	0.0560867
FBgn0020545	kraken	8.58115	0.0333628	0.0871445	0.701835	0.933254
FBgn0020546	lncRNA:iab4	-0.524389	0.710155	2.42477	0.769618	NA
FBgn0020556	lncRNA:bxd	0.126563	1.12629	1.26652	0.373855	0.798172
FBgn0020616	SA	10.5829	-0.00310498	0.0476221	0.948014	0.988572
FBgn0020617	Rx	4.18718	0.00681498	0.346962	0.984329	0.997161
FBgn0020618	Rack1	14.7347	0.105148	0.0453301	0.020362	0.201497
FBgn0020620	RN-tre	10.5936	-0.0243034	0.0528474	0.645603	0.917162
FBgn0020621	Pkn	12.4014	0.026567	0.0470655	0.572435	0.889559
FBgn0020622	Pi3K21B	10.8373	0.0231413	0.0575062	0.687379	0.928914
FBgn0020626	Osbp	10.4661	0.0477586	0.0513526	0.352365	0.782087
FBgn0020633	Mcm7	7.51498	-0.303609	0.127622	0.017361	0.181413
FBgn0020637	Lcp65Ag2	-1.26998	0	3.04989	1	NA
FBgn0020641	Lcp65Ad	0.217333	2.41121	1.56251	0.12279	0.518854
FBgn0020647	KrT95D	11.8614	-0.214391	0.0689633	0.00187869	0.0368669
FBgn0020653	Trxr-1	12.423	0.00776817	0.0353981	0.826298	0.963828
FBgn0020655	ArfGAP1	10.6286	0.035286	0.0533832	0.508615	0.86282
FBgn0020660	eIF4B	10.3274	-0.0367266	0.0745433	0.622233	0.912272
FBgn0020762	Atet	10.9282	0.102781	0.0545193	0.0594006	0.368959
FBgn0020764	Alas	9.60418	-0.0685669	0.059618	0.250102	0.697979
FBgn0020765	Acp65Aa	5.05135	-0.331529	0.784768	0.672693	0.92433
FBgn0020767	Spred	11.5549	-0.128071	0.0592192	0.0305671	0.256066
FBgn0020887	Su(z)12	9.98124	0.0107174	0.0652578	0.869549	0.973288
FBgn0020906	Jon25Bi	1.74769	-0.658699	1.37492	0.631881	0.91498
FBgn0020907	Scp2	0.0312502	0.829046	1.30949	0.526665	0.870492
FBgn0020908	Scp1	0.488674	0.289476	1.25497	0.817575	0.961986
FBgn0020909	Rtc1	7.86906	-0.342206	0.124581	0.00601692	0.0877379
FBgn0020910	RpL3	15.6046	0.0834109	0.0389421	0.0321999	0.26304
FBgn0020912	Ptx1	-0.45987	0.720468	2.19809	0.743086	NA
FBgn0020930	Dgkepsilon	9.07329	0.0417093	0.0681621	0.540595	0.878065
FBgn0021738	Crg-1	1.10446	-0.72085	0.914257	0.430431	0.828655
FBgn0021742	C901	2.96285	-1.62524	0.656657	0.0133229	0.152323
FBgn0021750	SerRS-m	8.24863	0.0724413	0.0794457	0.361856	0.788487
FBgn0021760	chb	11.2606	-0.00463811	0.062918	0.941236	0.987601
FBgn0021761	Nup154	10.032	0.0186038	0.0744822	0.802761	0.958828
FBgn0021764	sdk	13.8923	-0.019498	0.0816909	0.811354	0.96149
FBgn0021765	scu	10.7093	-0.113459	0.063276	0.0729605	0.411465
FBgn0021767	org-1	2.12085	-1.53077	1.00978	0.129534	0.532834
FBgn0021768	nudC	9.8996	-0.135972	0.0677957	0.0448977	0.317627
FBgn0021776	mira	5.44256	-0.0407983	0.288687	0.887614	0.975581
FBgn0021795	Tapdelta	12.3513	0.0435506	0.0718023	0.54416	0.880189
FBgn0021796	Tor	11.3164	0.0270616	0.0865563	0.754549	0.947215
FBgn0021800	Reph	11.0643	0.0332564	0.0667936	0.618556	0.91034
FBgn0021814	Vps28	9.02313	-0.0411185	0.0720126	0.568006	0.888691
FBgn0021825	DCTN2-p50	10.4261	-0.0385294	0.0488381	0.430158	0.828268
FBgn0021847	Ttc7	9.34351	0.238304	0.0699064	0.000652263	0.0163816
FBgn0021856	l(2)k14505	8.8024	0.0421222	0.0899898	0.639729	0.915681
FBgn0021872	Xbp1	13.0358	-0.0478463	0.0444126	0.28134	0.730021
FBgn0021874	Nle	7.88388	-0.0323231	0.115571	0.779722	0.950886
FBgn0021875	Zfrp8	8.13722	-0.0553267	0.108226	0.609202	0.905086
FBgn0021895	ytr	10.4933	0.1581	0.0582364	0.00663148	0.0944395
FBgn0021906	RFeSP	10.1861	-0.171876	0.0657514	0.00894812	0.117997
FBgn0021944	Coprox	8.42836	0.150512	0.0876574	0.0859705	0.443963
FBgn0021967	ND-PDSW	9.5006	-0.080867	0.0775108	0.29681	0.743037
FBgn0021979	l(2)k09913	11.6555	-0.212831	0.0574008	0.000209064	0.00652437
FBgn0021995	Rs1	8.87524	0.0793895	0.0752306	0.291296	0.738478
FBgn0022023	eIF3h	12.0816	0.119296	0.0508806	0.0190464	0.192594
FBgn0022027	Vps25	8.15077	0.041556	0.112231	0.711181	0.936972
FBgn0022029	l(2)k01209	10.0367	0.0458461	0.0534039	0.390629	0.80857
FBgn0022069	Nnp-1	10.1403	0.0646119	0.0627791	0.303389	0.746734
FBgn0022097	Vha36-1	10.2258	-0.0311646	0.0600161	0.603572	0.902046
FBgn0022153	l(2)k05819	11.0806	0.00419976	0.0558822	0.940092	0.987601
FBgn0022160	Gpo1	5.44946	0.0526701	0.210472	0.802395	0.958684
FBgn0022213	Cse1	10.6495	-0.0808159	0.0667167	0.225769	0.67317
FBgn0022224	ubl	8.70712	-0.0788326	0.121476	0.516368	0.865984
FBgn0022238	lolal	12.0827	-0.078116	0.0552494	0.157397	0.578905
FBgn0022288	l(2)09851	8.98144	-0.0267325	0.0674709	0.691952	0.930482
FBgn0022338	dnk	7.12938	-0.0818537	0.126217	0.516653	0.865984
FBgn0022343	CG3760	11.2789	0.0262102	0.0599325	0.661872	0.921218
FBgn0022344	CG10340	9.11018	0.0399789	0.084699	0.636918	0.915498
FBgn0022349	CG1910	11.6288	0.0696495	0.0471005	0.139209	0.546176
FBgn0022355	Tsf1	15.4261	0.438307	0.0799473	4.19491e-08	3.21647e-06
FBgn0022359	Sodh-2	3.97033	-0.453061	0.389114	0.244287	0.692999
FBgn0022361	Pur-alpha	12.3124	-0.0262336	0.0595478	0.659541	0.920907
FBgn0022382	Pka-R2	9.40739	-0.0504608	0.0718993	0.482787	0.852291
FBgn0022699	D19B	10.0597	0.00903563	0.0549732	0.869444	0.973288
FBgn0022702	Cht2	12.5115	0.143013	0.0604485	0.0179878	0.184794
FBgn0022709	Ak1	6.73441	-0.161796	0.141691	0.253497	0.702394
FBgn0022710	Ac13E	8.7023	0.111114	0.117599	0.344733	0.77754
FBgn0022724	Taf8	7.79346	0.189464	0.0959079	0.0482141	0.33126
FBgn0022740	HLH54F	-0.387063	-3.16384	2.25569	0.160734	NA
FBgn0022764	Sin3A	13.3721	0.0532995	0.090395	0.55544	0.884821
FBgn0022768	Pp2C1	10.484	-0.0498773	0.0712088	0.483654	0.852291
FBgn0022770	Peritrophin-A	3.17291	-0.0193901	0.531251	0.970885	0.994338
FBgn0022774	Oat	7.43947	-0.108355	0.154875	0.48416	0.852535
FBgn0022786	Hira	8.46713	0.155811	0.0872647	0.0741799	0.414872
FBgn0022787	Hel89B	11.6825	0.0491134	0.0660528	0.45715	0.841377
FBgn0022800	Cad96Ca	10.3538	-0.00892049	0.105313	0.932496	0.985354
FBgn0022893	Df31	15.4516	-0.0712882	0.0418132	0.0882087	0.447413
FBgn0022935	D19A	10.4622	0.0619279	0.0574928	0.281417	0.730057
FBgn0022936	CycH	7.90956	0.0859023	0.112514	0.445177	0.834968
FBgn0022942	Cbp80	11.0052	0.0662714	0.0440334	0.132318	0.535182
FBgn0022943	Cbp20	9.07571	-0.0587539	0.0901874	0.514747	0.865016
FBgn0022959	yps	12.9974	-0.0376798	0.0417704	0.367019	0.791532
FBgn0022960	vimar	10.6765	-0.0477061	0.0489033	0.329303	0.769541
FBgn0022981	rpk	9.33147	-0.540718	0.146043	0.000213517	0.00664542
FBgn0022984	qkr58E-3	11.6454	0.0572822	0.045154	0.204585	0.642444
FBgn0022985	qkr58E-2	10.0455	0.011652	0.0522318	0.823471	0.963747
FBgn0022986	qkr58E-1	11.1084	0.009902	0.0411346	0.809771	0.961228
FBgn0022987	qkr54B	11.2054	0.0921786	0.0617813	0.135695	0.541193
FBgn0023000	mth	11.9075	-0.0798763	0.0378482	0.0348204	0.27473
FBgn0023001	melt	12.205	-0.0517898	0.0443967	0.243403	0.69209
FBgn0023023	CRMP	12.9454	-0.0947615	0.0674814	0.160242	0.583237
FBgn0023081	gek	11.3347	-0.00957488	0.0673304	0.886916	0.975581
FBgn0023083	fray	10.1183	-0.0288363	0.0700052	0.6804	0.925805
FBgn0023090	dtr	6.72784	-0.783837	0.192382	4.61379e-05	0.00183292
FBgn0023094	cyc	10.1448	0.0482768	0.0515085	0.348626	0.780129
FBgn0023095	caps	10.9909	-0.0287106	0.0560634	0.608574	0.904853
FBgn0023096	btv	6.31975	0.0953713	0.21348	0.655058	0.919751
FBgn0023097	bon	11.8612	0.0885186	0.054624	0.105123	0.482409
FBgn0023129	aay	6.80155	1.44339	0.219986	5.33479e-11	6.57087e-09
FBgn0023130	a6	8.94086	0.0704816	0.0919583	0.443408	0.833811
FBgn0023143	Uba1	13.5628	-0.0514054	0.0405187	0.204555	0.642444
FBgn0023167	SmD3	9.96977	-0.0523741	0.0802392	0.513933	0.865016
FBgn0023169	AMPKalpha	10.9078	0.158224	0.0459073	0.000567687	0.0145736
FBgn0023170	RpL39	13.2429	-0.0303275	0.180904	0.866863	0.972754
FBgn0023171	rnh1	8.22179	-0.100415	0.113983	0.378334	0.801171
FBgn0023172	RhoGEF2	12.6548	-0.0135114	0.0861074	0.875313	0.975339
FBgn0023174	Prosbeta2	11.1253	-0.215388	0.0524608	4.03119e-05	0.00164923
FBgn0023175	Prosalpha7	10.7951	-0.020231	0.0514801	0.694329	0.930927
FBgn0023177	Pp4-19C	11.0696	0.092732	0.044357	0.0365654	0.28394
FBgn0023179	amon	3.69145	-0.0706509	0.372424	0.84954	0.968401
FBgn0023180	Orc6	4.1842	0.226545	0.327531	0.489141	0.854114
FBgn0023181	Orc4	8.21449	0.239019	0.10456	0.0222566	0.211392
FBgn0023212	EloB	10.6103	-0.0609834	0.0542579	0.261033	0.711773
FBgn0023213	eIF4G1	13.3806	-0.025447	0.0566325	0.653189	0.91952
FBgn0023214	edl	10.1141	0.0543824	0.0753293	0.470339	0.846679
FBgn0023215	Mnt	11.2009	0.0133687	0.108573	0.902003	0.978946
FBgn0023216	Parg	8.54255	0.118139	0.0857262	0.168175	0.598117
FBgn0023388	Dap160	11.054	-0.0253839	0.0514509	0.621757	0.912253
FBgn0023395	Chd3	4.95379	-0.188688	0.264517	0.475642	0.849634
FBgn0023407	B4	11.9786	0.0772207	0.0720434	0.283781	0.731528
FBgn0023415	Acp32CD	9.11899	0.247322	0.130351	0.0577817	0.364617
FBgn0023416	Ac3	9.17114	-1.27817	0.152168	4.47514e-17	1.29533e-14
FBgn0023441	fus	13.0342	-0.0649242	0.0795813	0.414602	0.822885
FBgn0023458	Rbcn-3A	11.9884	0.0372715	0.10667	0.726783	0.941979
FBgn0023477	Taldo	11.042	-0.116294	0.0619886	0.0606488	0.372912
FBgn0023479	teq	8.09286	-0.444032	0.13478	0.000986007	0.0225168
FBgn0023489	Pph13	1.90208	2.33828	0.869073	0.00713351	0.0996922
FBgn0023506	Es2	7.77324	0.0414164	0.0992376	0.676425	0.924586
FBgn0023507	D2hgdh	5.68409	-0.406076	0.232272	0.0804156	0.432301
FBgn0023508	Ocrl	9.8768	-0.0596448	0.0547424	0.27591	0.726642
FBgn0023509	mip130	10.2586	0.0891354	0.0560018	0.111463	0.495004
FBgn0023510	Rbcn-3B	10.3777	-0.0570286	0.0755248	0.45019	0.838945
FBgn0023511	Edem1	10.2208	0.0457759	0.051832	0.37715	0.800533
FBgn0023512	eIF2Bepsilon	9.44351	-0.0401422	0.0626209	0.521499	0.868237
FBgn0023513	CG14803	7.2038	0.0624199	0.137634	0.650173	0.918849
FBgn0023514	CG14805	9.0826	0.0762077	0.0737122	0.301204	0.745245
FBgn0023515	CG14814	7.98205	0.176856	0.126157	0.160952	0.584432
FBgn0023516	Pex5	8.36491	0.123102	0.0965242	0.202186	0.639543
FBgn0023517	Pgam5	9.02446	0.0791858	0.0803321	0.324265	0.764428
FBgn0023518	trr	10.9116	-0.00546815	0.0947772	0.953992	0.989902
FBgn0023519	mRpL16	8.53934	0.153731	0.1026	0.134043	0.53831
FBgn0023520	CG3857	8.29814	-0.0381262	0.0845414	0.652007	0.919216
FBgn0023521	CG3587	7.86019	-0.104304	0.114326	0.36159	0.788487
FBgn0023522	CG11596	9.20438	-0.0460093	0.0715479	0.520188	0.867425
FBgn0023523	Or2a	3.59535	0.495248	0.437587	0.257731	0.708862
FBgn0023524	CG3078	3.50606	-0.0314426	0.431474	0.941908	0.987601
FBgn0023525	CG3191	3.30098	0.300274	0.427879	0.482821	0.852291
FBgn0023526	CG2865	10.3633	0.225074	0.0711411	0.00155744	0.031983
FBgn0023527	CG3071	7.9887	-0.0980681	0.0874201	0.261946	0.71211
FBgn0023528	CG2924	11.6681	-0.0237542	0.0417771	0.569632	0.889335
FBgn0023529	CG2918	13.4756	-0.0462927	0.0509659	0.363716	0.78926
FBgn0023530	CG3740	7.27897	-0.0395548	0.151935	0.794602	0.955631
FBgn0023531	CG32809	9.24549	0.0540175	0.0918207	0.556335	0.88514
FBgn0023534	CG17778	4.5219	0.0815198	0.298033	0.784449	0.95171
FBgn0023535	arg	4.68913	-0.22793	0.289348	0.43085	0.82905
FBgn0023536	CG3156	8.2108	0.0144493	0.0876301	0.869031	0.973255
FBgn0023537	CG17896	11.3712	-0.216516	0.059916	0.000301907	0.00880473
FBgn0023540	CG3630	8.88688	0.392352	0.0808765	1.22689e-06	7.06711e-05
FBgn0023541	Cyp4d14	5.40693	-1.11045	0.298855	0.000202647	0.00637567
FBgn0023542	Nmd3	8.45715	0.0532495	0.0795516	0.503259	0.859713
FBgn0023545	PIG-K	9.05991	0.0732599	0.0858555	0.393497	0.808595
FBgn0023549	Mct1	8.20012	-0.443937	0.12696	0.0004711	0.0125677
FBgn0023550	FarO	3.48517	-1.44238	1.42383	0.311046	0.752872
FBgn0024150	Ac78C	3.28714	0.838272	0.490843	0.0876695	0.446027
FBgn0024179	wit	10.6302	0.0328555	0.0559013	0.556706	0.88514
FBgn0024183	vig	11.6204	-0.208769	0.0360733	7.15002e-09	6.27143e-07
FBgn0024184	unc-4	5.93118	0.385105	0.334289	0.249317	0.696907
FBgn0024187	syd	11.0674	-0.0558687	0.0555976	0.314956	0.756777
FBgn0024188	san	9.32354	-0.117944	0.079879	0.139801	0.546291
FBgn0024189	sns	10.6944	0.0890294	0.100355	0.375003	0.798559
FBgn0024191	sip1	8.64159	-0.0994251	0.085668	0.245811	0.693344
FBgn0024194	rasp	8.3147	-0.303851	0.10436	0.00359611	0.0594889
FBgn0024196	robl	10.0293	-0.0263719	0.0827987	0.750101	0.947186
FBgn0024222	IKKbeta	9.15231	0.0695166	0.070604	0.324821	0.764428
FBgn0024227	aurB	6.62882	-0.438404	0.171085	0.0103926	0.130364
FBgn0024230	Hs2st	9.17631	-0.0510938	0.0773629	0.50897	0.863042
FBgn0024232	gprs	4.55371	0.0515561	0.304726	0.865649	0.972567
FBgn0024234	gbb	12.0168	0.11889	0.0417859	0.00443812	0.0696268
FBgn0024236	foi	10.2911	-0.0768459	0.0555838	0.166811	0.595173
FBgn0024238	Fim	11.144	-0.0743688	0.0478777	0.120349	0.513792
FBgn0024244	drm	9.92523	-0.325453	0.492216	0.508484	0.86282
FBgn0024245	dnt	10.6781	-0.12174	0.0655933	0.0634566	0.382003
FBgn0024248	chico	9.99332	0.0702577	0.0517918	0.174927	0.607106
FBgn0024249	cato	0.368717	0.0925997	1.59488	0.9537	0.989865
FBgn0024250	brk	10.9695	-0.0268733	0.0664924	0.686098	0.928172
FBgn0024251	bbx	3.4158	-0.352659	0.484788	0.46695	0.844679
FBgn0024273	WASp	9.73808	0.0112727	0.0547259	0.836802	0.966496
FBgn0024277	trio	12.2772	0.00144866	0.073319	0.984236	0.997161
FBgn0024285	Srp54	11.1502	-0.0305347	0.0495823	0.538002	0.876458
FBgn0024288	Sox100B	2.60834	-0.604159	0.520542	0.245791	0.693344
FBgn0024289	Sodh-1	-0.666486	-1.92387	1.97463	0.329908	NA
FBgn0024291	Sirt1	11.4328	0.00287895	0.040096	0.94276	0.987601
FBgn0024293	Spn43Ab	1.62663	1.65551	1.04309	0.112485	0.496332
FBgn0024294	Spn43Aa	17.6449	0.177035	0.0719509	0.0138746	0.156875
FBgn0024314	Plap	10.6325	0.0178719	0.0609368	0.769303	0.949174
FBgn0024315	Picot	3.42183	0.0887843	0.464105	0.848289	0.968059
FBgn0024320	Npc1a	11.9602	0.0693579	0.0467472	0.137894	0.544452
FBgn0024321	NK7.1	8.82472	0.0559585	0.0900234	0.534205	0.874155
FBgn0024326	Mkk4	10.5735	-0.0513721	0.050872	0.312577	0.75522
FBgn0024329	Mekk1	11.4673	0.0780594	0.06057	0.197486	0.634767
FBgn0024330	MED6	9.1533	0.0791715	0.0863851	0.359408	0.786827
FBgn0024352	Stip1	11.4928	-0.0508148	0.064679	0.432074	0.82905
FBgn0024360	MTPAP	8.23983	-0.245869	0.0898883	0.00623285	0.0899349
FBgn0024361	Tsp2A	3.81648	-0.387102	0.452571	0.392364	0.80857
FBgn0024362	Naa30A	10.5227	-0.015641	0.0474869	0.741873	0.945958
FBgn0024364	CG11417	7.77384	0.0308298	0.0933144	0.741108	0.945527
FBgn0024365	CG12773	10.531	0.0859573	0.0667984	0.198158	0.635462
FBgn0024366	CG11409	11.0152	-0.59674	0.313509	0.0569852	0.363158
FBgn0024371	E2f2	9.17615	0.0529278	0.0737037	0.472686	0.848096
FBgn0024432	Dlc90F	10.6156	-0.0453527	0.0556443	0.415046	0.823265
FBgn0024491	Bin1	9.49071	0.0239756	0.0789882	0.761483	0.948224
FBgn0024509	Sec13	10.9425	0.0682447	0.0640349	0.28654	0.734291
FBgn0024510	dlt	7.83467	0.0111135	0.092838	0.904714	0.97931
FBgn0024542	Neos	8.75117	0.00709129	0.0857731	0.93411	0.985433
FBgn0024555	flfl	12.3322	-0.0140896	0.0607	0.816447	0.961986
FBgn0024556	mEFTu1	10.3789	-0.00732849	0.0702281	0.916889	0.982269
FBgn0024558	Dph5	8.27844	0.10075	0.109824	0.358947	0.786827
FBgn0024689	fws	9.8927	0.117842	0.0642443	0.0666134	0.390704
FBgn0024698	Cpsf160	9.26976	-0.0326955	0.0758955	0.666617	0.922202
FBgn0024728	Slip1	11.608	0.0522726	0.0572517	0.361226	0.788487
FBgn0024732	Drep1	8.45023	0.0776127	0.0928129	0.403027	0.814637
FBgn0024733	RpL10	14.9841	0.0287228	0.0617885	0.642034	0.915941
FBgn0024734	PRL-1	9.40039	-0.132178	0.0765865	0.0843707	0.441212
FBgn0024754	Flo1	11.0779	-0.0283535	0.0463666	0.540865	0.878065
FBgn0024804	Dbp80	10.8178	0.0181472	0.049772	0.715406	0.938026
FBgn0024806	DIP2	11.9001	-0.0470158	0.0647022	0.467441	0.844705
FBgn0024807	DIP1	13.2833	-0.0369392	0.041063	0.368347	0.792454
FBgn0024811	Crk	11.5575	0.0187922	0.0624389	0.763438	0.949
FBgn0024814	Clc	11.8565	0.016968	0.0524789	0.746445	0.946308
FBgn0024833	AP-1mu	10.5522	0.00511169	0.0516045	0.921095	0.982634
FBgn0024836	stan	13.2881	-0.0530298	0.113081	0.639103	0.915681
FBgn0024841	Pcd	9.58723	-0.128109	0.0895481	0.152539	0.570444
FBgn0024846	p38b	9.45701	0.000808574	0.0717941	0.991014	0.998113
FBgn0024887	kin17	9.46642	0.000387073	0.0725808	0.995745	0.998967
FBgn0024889	Kap-alpha1	10.008	-0.0402231	0.0495911	0.417311	0.824996
FBgn0024897	b6	3.97757	-0.152976	0.348612	0.660795	0.921218
FBgn0024909	Taf7	8.26516	0.0310911	0.0867055	0.719907	0.939908
FBgn0024912	agt	8.31765	0.0475854	0.140478	0.734806	0.943488
FBgn0024913	Actbeta	6.18248	-0.227221	0.178531	0.203115	0.640999
FBgn0024920	Ts	5.14421	-0.203901	0.26945	0.449211	0.838388
FBgn0024921	Tnpo	11.3759	-0.0240501	0.05502	0.662027	0.921218
FBgn0024941	RSG7	5.53381	-0.176068	0.201535	0.382319	0.804781
FBgn0024943	PIP82	-0.932041	1.27697	2.20966	0.56333	NA
FBgn0024944	Oamb	1.16104	-0.400461	0.913132	0.660982	0.921218
FBgn0024945	NitFhit	8.40173	-0.0343671	0.0783256	0.660827	0.921218
FBgn0024947	NTPase	10.6816	0.0503653	0.0499468	0.313272	0.756025
FBgn0024956	Mat1	8.53522	0.172973	0.0850915	0.0420742	0.307871
FBgn0024957	Irp-1B	11.2049	0.049033	0.053511	0.359501	0.786827
FBgn0024958	Irp-1A	10.0427	0.0163296	0.0611711	0.789508	0.954236
FBgn0024963	GluClalpha	4.68015	-0.744657	0.343952	0.0303874	0.255501
FBgn0024973	CG2701	9.67157	0.12789	0.0642437	0.0465137	0.324419
FBgn0024975	CG2712	7.26898	-0.13134	0.102454	0.199864	0.637576
FBgn0024980	Syx4	2.92174	-0.217759	0.450474	0.628812	0.91498
FBgn0024983	CG4293	9.32446	0.046727	0.0613182	0.446036	0.835631
FBgn0024985	Rilpl	10.7981	0.027889	0.0478524	0.560019	0.885295
FBgn0024986	CG3719	8.63189	-0.0633383	0.0945281	0.502828	0.859551
FBgn0024987	ssx	11.3035	0.028162	0.0492277	0.56727	0.888148
FBgn0024989	CG3777	9.49546	-0.112243	0.117597	0.339846	0.776063
FBgn0024991	CG2694	7.43549	0.202334	0.117035	0.0838376	0.439616
FBgn0024992	Spg7	8.37244	0.0132949	0.0879408	0.879834	0.975509
FBgn0024993	CG2662	6.6276	-0.119385	0.148275	0.420727	0.825838
FBgn0024994	Ugalt	9.74785	0.0839014	0.0569409	0.140621	0.548037
FBgn0024995	CG2680	0.0449475	-1.9659	1.55491	0.206117	0.643587
FBgn0024996	eIF2Bbeta	9.31933	-0.0191735	0.0597837	0.748427	0.946405
FBgn0024997	CG2681	0.796929	-0.786722	1.06773	0.461234	0.841944
FBgn0024998	CG2685	8.79625	0.0680695	0.0730021	0.351113	0.781221
FBgn0025109	Bem46	8.34026	-0.0687876	0.0942433	0.465455	0.844248
FBgn0025111	Ant2	6.69999	0.198887	0.150972	0.18771	0.624018
FBgn0025118	tRNA:Pro-CGG-3-1	1.5517	1.35369	1.00208	0.176731	0.609608
FBgn0025185	az2	8.06986	0.047253	0.0892021	0.596299	0.899069
FBgn0025186	ari-2	11.0992	0.0476711	0.0416189	0.252036	0.700685
FBgn0025334	PHDP	0.545562	-2.48353	1.44226	0.085075	0.44325
FBgn0025335	Cpes	9.03624	-0.0589265	0.0690008	0.393107	0.80857
FBgn0025336	CG4882	9.23509	-0.00510769	0.0802819	0.949271	0.988849
FBgn0025352	Mtpbeta	11.4461	0.0794382	0.0459022	0.0835239	0.439351
FBgn0025360	Optix	8.69643	0.153031	0.147777	0.300412	0.745245
FBgn0025366	Ip259	12.0218	0.0247252	0.0545646	0.65045	0.918849
FBgn0025373	Fpps	11.0117	0.00816455	0.0421625	0.846454	0.967723
FBgn0025381	rush	10.1249	-0.0157394	0.0502293	0.754014	0.947186
FBgn0025382	Rab27	5.82324	0.252589	0.244113	0.300799	0.745245
FBgn0025383	CG14780	-0.594755	2.47319	1.86133	0.183939	NA
FBgn0025387	CG12184	2.72984	1.48462	0.603604	0.0139093	0.157114
FBgn0025388	CG12179	8.59485	0.071517	0.0920231	0.437063	0.830609
FBgn0025390	Mur2B	9.23531	-0.0950131	0.151538	0.530664	0.87236
FBgn0025391	Scgdelta	2.17245	-0.556042	0.718546	0.439023	0.831644
FBgn0025393	CG14795	1.49612	1.81843	0.910305	0.0457597	0.321022
FBgn0025394	inc	11.4624	0.00556578	0.0368905	0.880076	0.975509
FBgn0025454	Cyp6g1	6.45965	-0.136715	0.31467	0.663947	0.921376
FBgn0025455	CycT	11.5822	-0.000737828	0.0562822	0.98954	0.998111
FBgn0025456	CREG	9.03462	0.0440894	0.087843	0.61573	0.908105
FBgn0025457	Bub3	10.3633	0.126016	0.0668225	0.0593174	0.368829
FBgn0025463	Bap60	11.4135	-0.041463	0.0447505	0.354167	0.784328
FBgn0025469	slv	8.69474	-0.0193622	0.0854972	0.82084	0.963052
FBgn0025519	fidipidine	9.42696	0.076209	0.0635659	0.230568	0.67817
FBgn0025525	bab2	9.63134	0.126365	0.10265	0.218313	0.662364
FBgn0025549	unc-119	10.7832	-0.031523	0.0422078	0.455153	0.840472
FBgn0025558	CG4101	7.54488	-0.130466	0.120529	0.279056	0.72866
FBgn0025571	SF1	11.7868	0.0905209	0.0383405	0.0182269	0.187084
FBgn0025574	Pli	11.7672	0.0337917	0.0469002	0.471216	0.847333
FBgn0025578	Lcp9	5.19092	-0.280265	0.63561	0.659257	0.920816
FBgn0025582	eIF3e	12.0864	-0.00986624	0.0505381	0.845218	0.967521
FBgn0025592	Gk1	8.70105	-0.0913997	0.0709292	0.197535	0.634767
FBgn0025595	AkhR	1.47287	-0.821106	1.01781	0.419819	0.825239
FBgn0025608	Faf2	10.2491	0.0836491	0.0456883	0.0671208	0.392685
FBgn0025612	CG3062	-0.887202	-1.4564	1.97907	0.46179	NA
FBgn0025613	CG3081	1.32554	-1.69264	0.918684	0.0654071	0.386962
FBgn0025615	Torsin	10.6137	0.0957069	0.0547003	0.0801771	0.431653
FBgn0025616	CG13359	0.326481	0.65057	1.53087	0.670861	0.923023
FBgn0025620	CG13360	5.02112	0.285969	0.505668	0.571715	0.889335
FBgn0025621	CG16989	9.42142	-0.137204	0.0817097	0.0931196	0.459369
FBgn0025624	CG4025	7.84466	0.00894928	0.0913036	0.921919	0.982751
FBgn0025625	Sik2	7.14009	-0.0157267	0.137906	0.909207	0.980422
FBgn0025626	CG4281	10.0795	0.033208	0.0485076	0.493601	0.855936
FBgn0025627	CG4194	8.26103	0.038026	0.0952853	0.689837	0.929697
FBgn0025628	CG4199	10.9134	0.299611	0.0513939	5.55244e-09	4.98342e-07
FBgn0025629	CG4045	7.98716	0.0332613	0.105401	0.75233	0.947186
FBgn0025630	Rtca	9.15712	0.352201	0.0618146	1.21433e-08	1.01881e-06
FBgn0025631	moody	9.18027	-0.0202516	0.0870826	0.816106	0.961986
FBgn0025632	CG4313	7.5373	0.00336071	0.105046	0.974478	0.994338
FBgn0025633	CG13366	11.9244	-0.111242	0.0514647	0.0306552	0.256066
FBgn0025634	CG13367	9.04509	0.0107025	0.0828371	0.8972	0.978042
FBgn0025635	CG17829	8.64597	0.226634	0.0741711	0.00224642	0.0420859
FBgn0025637	SkpA	11.8783	0.0197591	0.0602323	0.742875	0.946089
FBgn0025638	Roc1a	11.445	0.0339544	0.0666641	0.610517	0.905677
FBgn0025639	Hmt4-20	12.4438	0.0391025	0.0715463	0.584699	0.894205
FBgn0025640	CG13369	8.40034	-0.0547557	0.0951789	0.565093	0.887367
FBgn0025641	DAAM	9.77825	0.0367304	0.132282	0.781267	0.951347
FBgn0025642	CG32812	3.96828	-0.0586831	0.46394	0.899345	0.978314
FBgn0025644	CG14424	1.71063	0.175937	0.780656	0.82169	0.963375
FBgn0025674	CycK	10.7319	0.0655753	0.0491934	0.182529	0.618848
FBgn0025676	CkIIalpha-i3	9.38479	-0.104635	0.0822275	0.203191	0.640999
FBgn0025678	CaBP1	12.5151	0.194602	0.0484568	5.91983e-05	0.00222532
FBgn0025680	cry	7.25487	-0.188527	0.1525	0.216367	0.659235
FBgn0025681	CG3558	10.7935	0.102078	0.0502353	0.0421546	0.307928
FBgn0025682	scf	10.9354	-0.0119055	0.0646782	0.853956	0.969514
FBgn0025683	CG3164	13.0528	-0.0389434	0.0421852	0.355927	0.784747
FBgn0025684	MFS18	9.37216	-0.0314477	0.0779301	0.686553	0.928222
FBgn0025686	Amnionless	3.52358	0.225812	1.32852	NA	NA
FBgn0025692	Lfg	3.73144	1.14088	0.676157	0.0915453	0.455121
FBgn0025693	ZnT41F	10.0255	-0.0300198	0.0597726	0.615503	0.907924
FBgn0025697	santa-maria	5.5727	0.0413059	0.280852	0.883074	0.975573
FBgn0025700	CG5885	12.0183	0.0217594	0.0555694	0.695375	0.930973
FBgn0025702	Srpk79D	6.84383	-0.030093	0.164973	0.855259	0.969947
FBgn0025709	CNT2	-0.0282009	0.719459	1.59204	0.651335	0.919187
FBgn0025712	CG13920	5.19565	-0.137379	0.238737	0.564993	0.887367
FBgn0025716	Bap55	10.1313	0.0483003	0.0723035	0.50412	0.859982
FBgn0025720	Ate1	9.814	-0.0691918	0.0579987	0.232874	0.681001
FBgn0025724	beta'COP	12.0114	-0.00373217	0.0434217	0.931505	0.985159
FBgn0025725	alphaCOP	12.2809	0.0203751	0.039946	0.610006	0.905578
FBgn0025726	unc-13	13.8804	-0.974351	0.152294	1.57595e-10	1.80657e-08
FBgn0025739	pon	8.28129	0.259251	0.122503	0.0343215	0.271988
FBgn0025740	PlexB	11.9337	-0.0583203	0.0916002	0.524331	0.869106
FBgn0025741	PlexA	13.459	-0.0212288	0.0670356	0.751486	0.947186
FBgn0025742	mtm	9.86425	-0.0113727	0.0578203	0.844069	0.967521
FBgn0025743	mbt	10.9025	-0.0125464	0.040929	0.759193	0.947766
FBgn0025777	homer	11.1775	0.0141007	0.0438645	0.747861	0.946308
FBgn0025781	Cdc16	9.02375	0.0206325	0.0678044	0.760904	0.9481
FBgn0025790	TBPH	11.3923	-0.00847951	0.0319056	0.790417	0.954469
FBgn0025800	Smox	11.4321	-0.146982	0.0559914	0.00866292	0.115686
FBgn0025802	Sbf	10.2702	0.0186375	0.0685245	0.785635	0.952187
FBgn0025807	Rad9	7.24208	0.136328	0.117874	0.247452	0.695192
FBgn0025808	Rad17	8.10627	0.288156	0.0983366	0.00338636	0.0571534
FBgn0025809	Paf-AHalpha	10.3342	0.0164023	0.0568434	0.772924	0.949174
FBgn0025814	Mgstl	9.78866	0.312805	0.11029	0.00456544	0.0709109
FBgn0025815	Mcm6	8.22328	-0.132756	0.0982336	0.176557	0.609556
FBgn0025820	JTBR	8.22353	0.0262841	0.0975705	0.787633	0.953009
FBgn0025827	CG6421	3.46093	0.443517	0.462551	0.337634	0.774473
FBgn0025830	IntS8	9.35523	-0.042652	0.0739233	0.563956	0.887094
FBgn0025832	Fen1	6.96078	-0.125747	0.135201	0.352333	0.782087
FBgn0025833	CG8910	5.65123	0.0263097	0.25543	0.917962	0.982432
FBgn0025835	CG17707	10.107	0.122041	0.145843	0.402708	0.814278
FBgn0025836	RhoGAP1A	12.3906	0.0450176	0.0623555	0.470325	0.846679
FBgn0025837	CG17636	1.13722	0.121791	1.28803	0.924667	0.983277
FBgn0025838	CG2652	-1.26766	0.78678	2.69723	0.770516	NA
FBgn0025839	ND-B14.5A	8.42725	-0.194457	0.103127	0.0593477	0.368829
FBgn0025864	Crag	12.0625	-0.00285025	0.0731712	0.968928	0.993874
FBgn0025865	Cortactin	11.436	-0.00307106	0.0379917	0.935573	0.98636
FBgn0025866	CalpB	9.75197	-0.202628	0.0639337	0.00152787	0.0316452
FBgn0025874	Meics	8.79867	-0.137869	0.0777441	0.0761666	0.420234
FBgn0025878	wrapper	7.90687	0.169792	0.107945	0.11573	0.503461
FBgn0025879	Timp	6.9772	-0.337835	0.22705	0.136769	0.543044
FBgn0025881	snoRNA:Me18S-A1576	-0.0663622	-1.96672	1.95271	0.313849	0.756086
FBgn0025885	Inos	9.74143	0.403315	0.215704	0.0615162	0.376048
[truncated: 10,326 more rows]

## Sheet: E. DESEQ2_Exp.1_WD_Mix_NA_vs_C
Extended Data Table 1E| Differential expression analysis (DESeq2) in Mix non-assimilated vs control from selection experiment 1 in wing disc.
GENEID	Symbol	log2BaseMean	log2FC	Stderr_log2FC	pvalue	padjust
FBgn0000008	a	9.42802	0.21171	0.135628	0.118532	0.551198
FBgn0000014	abd-A	1.21047	-2.33363	1.7793	0.189673	0.663834
FBgn0000015	Abd-B	-1.37609	-1.21571	5.05898	0.810093	NA
FBgn0000017	Abl	10.9931	0.132008	0.120396	0.272885	0.743879
FBgn0000018	abo	8.30422	-0.0723109	0.116429	0.534551	0.890387
FBgn0000022	ac	8.68119	-0.023932	0.108147	0.824865	0.968405
FBgn0000024	Ace	1.98784	-1.43732	1.24146	0.246958	0.720839
FBgn0000032	Acph-1	9.45576	-0.219305	0.0873554	0.0120564	0.158446
FBgn0000036	nAChRalpha1	1.55466	-0.618414	0.961269	0.52001	0.885893
FBgn0000037	mAChR-A	0.471175	0.564438	1.65852	0.73361	0.946565
FBgn0000038	nAChRbeta1	-1.28284	2.53021	4.26427	0.552946	NA
FBgn0000042	Act5C	16.7863	0.103285	0.077158	0.180694	0.65065
FBgn0000043	Act42A	14.891	0.0357229	0.0641592	0.577674	0.903538
FBgn0000044	Act57B	8.58458	0.253853	0.307236	0.408663	0.824992
FBgn0000046	Act87E	8.24383	0.0497502	0.263545	0.850271	0.972524
FBgn0000052	Pfas	10.9394	-0.19534	0.0807857	0.0156061	0.18534
FBgn0000053	Gart	11.4902	-0.233744	0.108325	0.030943	0.279865
FBgn0000055	Adh	-1.20129	-0.729791	4.13015	0.859745	NA
FBgn0000057	adp	9.14175	-0.0524413	0.0700279	0.45394	0.849549
FBgn0000061	al	10.4447	0.147902	0.0918644	0.107398	0.529374
FBgn0000063	Mps1	9.02841	0.0185683	0.0913408	0.838911	0.969909
FBgn0000064	Ald1	12.6951	-0.176272	0.084934	0.0379501	0.313157
FBgn0000071	Ama	12.3068	-0.15175	0.100582	0.13137	0.576227
FBgn0000075	amd	9.29086	-0.240953	0.206136	0.242442	0.717028
FBgn0000077	amx	7.22485	0.0235991	0.157307	0.880749	0.97887
FBgn0000078	Amy-d	2.58635	1.4814	5.16741	NA	NA
FBgn0000079	Amy-p	2.5089	-0.0863841	1.69599	0.959378	0.994323
FBgn0000083	AnxB9	12.4465	-0.150715	0.0642918	0.0190664	0.210952
FBgn0000084	AnxB10	8.20177	0.332336	0.190831	0.0815925	0.460475
FBgn0000092	dyw	3.70949	-0.597849	0.508304	0.239529	0.714949
FBgn0000097	aop	11.5296	0.176354	0.112887	0.118238	0.551068
FBgn0000100	RpLP0	15.7492	-0.0348918	0.0569891	0.54037	0.891611
FBgn0000108	Appl	6.02364	-0.0935316	0.277939	0.73648	0.948087
FBgn0000109	Aprt	7.614	-0.110984	0.168463	0.510023	0.881327
FBgn0000114	bru1	3.17814	-3.03807	1.18437	0.0103137	0.14447
FBgn0000115	Arl1	10.1077	0.178529	0.0957573	0.062267	0.40681
FBgn0000116	Argk	13.9607	0.0256071	0.0741991	0.730009	0.944642
FBgn0000117	arm	14.3226	0.081308	0.0646676	0.208637	0.683301
FBgn0000119	arr	12.7351	0.148563	0.11865	0.210528	0.684976
FBgn0000121	Arr2	3.91548	0.50545	0.4585	0.270288	0.742948
FBgn0000137	ase	5.3076	0.239502	0.321999	0.456999	0.851048
FBgn0000139	ash2	10.1153	0.0454057	0.0575793	0.43036	0.836787
FBgn0000140	asp	11.4226	0.128314	0.122086	0.293254	0.757515
FBgn0000146	aub	4.20347	-0.245254	0.39979	0.539574	0.891611
FBgn0000147	aurA	9.76814	0.158263	0.096449	0.100818	0.51005
FBgn0000150	awd	14.8059	0.0205165	0.0905263	0.820707	0.967116
FBgn0000152	Axs	9.66846	-0.0987032	0.0797789	0.21601	0.689062
FBgn0000153	b	5.13939	0.109454	0.476236	0.818222	0.96599
FBgn0000157	Dll	11.1137	0.153444	0.0661243	0.0203114	0.220026
FBgn0000158	bam	2.29617	-1.0153	0.713105	0.154511	0.612931
FBgn0000163	baz	10.804	0.0121002	0.128231	0.924821	0.987859
FBgn0000173	ben	12.4896	0.0668173	0.0395714	0.091311	0.486338
FBgn0000179	bi	11.5568	-0.0971699	0.102475	0.343015	0.790089
FBgn0000180	bib	10.8495	0.126188	0.149613	0.39899	0.81983
FBgn0000181	bic	14.6732	0.0153414	0.0820879	0.851747	0.97278
FBgn0000183	BicD	11.1914	0.0352706	0.11555	0.760182	0.956117
FBgn0000206	boss	0.422889	-0.533196	1.38897	0.701068	0.936722
FBgn0000212	brm	12.808	0.0474875	0.0787266	0.546379	0.89318
FBgn0000216	Brd	8.16146	-0.233897	0.137563	0.0890771	0.482884
FBgn0000221	brn	7.8453	0.104202	0.113233	0.357446	0.796308
FBgn0000228	Bsg25D	10.015	0.0881144	0.0943588	0.350395	0.794372
FBgn0000229	bsk	10.394	0.0133507	0.0532994	0.802212	0.96415
FBgn0000233	btd	2.80142	0.650507	0.635587	0.306084	0.768437
FBgn0000239	bur	11.4168	-0.00507873	0.045615	0.911347	0.985364
FBgn0000241	bw	1.18918	0.678045	1.12373	0.546249	0.89311
FBgn0000244	by	9.36902	0.128419	0.0914104	0.160063	0.621293
FBgn0000246	c(3)G	7.85745	-0.372205	0.133759	0.00539173	0.0936859
FBgn0000247	ca	10.3686	0.0601452	0.108908	0.580772	0.903769
FBgn0000250	cact	11.2522	0.021566	0.0484065	0.655945	0.924822
FBgn0000251	cad	-1.12738	0.555716	2.40367	0.817163	NA
FBgn0000253	Cam	13.9824	0.0820457	0.0520703	0.115102	0.543703
FBgn0000256	capu	11.1817	0.0872038	0.0820083	0.287622	0.753157
FBgn0000257	car	9.01843	0.0130781	0.0751544	0.861853	0.974819
FBgn0000259	CkIIbeta	12.1801	-0.0289526	0.0623528	0.642407	0.920728
FBgn0000261	Cat	13.0746	0.221057	0.297659	0.457693	0.851881
FBgn0000273	Pka-C1	11.4205	-0.0805437	0.0866959	0.35287	0.795013
FBgn0000283	Cp190	12.3772	0.0672026	0.0715382	0.347528	0.792732
FBgn0000286	Cf2	9.59315	-0.0342789	0.0807544	0.671213	0.929272
FBgn0000287	salr	12.0136	0.0406132	0.0794223	0.609101	0.912593
FBgn0000289	cg	12.6626	0.0858333	0.0879753	0.329237	0.781834
FBgn0000299	Col4a1	11.9045	-0.240466	0.296785	0.417803	0.829837
FBgn0000303	ChAT	0.808651	0.302636	1.10454	0.784089	0.96103
FBgn0000307	chif	11.4822	0.136647	0.0764609	0.0739135	0.441039
FBgn0000308	chic	14.7604	0.157032	0.0809215	0.0523136	0.373112
FBgn0000316	cin	10.5795	-0.112308	0.0490353	0.0220011	0.229864
FBgn0000317	ck	11.3856	0.162143	0.164625	0.32466	0.779666
FBgn0000318	cl	11.2018	0.0916871	0.064969	0.158173	0.619435
FBgn0000319	Chc	13.7307	0.0666077	0.0964843	0.489976	0.869657
FBgn0000320	eya	8.92755	0.237989	0.142115	0.0940074	0.492947
FBgn0000326	clt	8.8397	-0.0448765	0.0740415	0.544449	0.892364
FBgn0000330	cm	9.99413	-0.022067	0.0653851	0.735745	0.947728
FBgn0000339	cni	10.0484	-0.0251072	0.0836362	0.764028	0.956824
FBgn0000346	comt	8.2182	-0.0519415	0.112229	0.643495	0.921377
FBgn0000351	cort	7.04969	-0.0782852	0.181585	0.666381	0.927684
FBgn0000352	cos	11.1347	0.0332399	0.0841021	0.692671	0.933699
FBgn0000355	Cp15	0.369363	-1.42721	1.97738	0.470435	0.8573
FBgn0000357	Cp18	2.07056	-1.22159	0.837541	0.144692	0.597697
FBgn0000370	crc	12.5883	0.0806941	0.0896623	0.368132	0.801391
FBgn0000376	crm	9.98506	-0.093586	0.0847731	0.269611	0.742613
FBgn0000377	crn	10.3519	-0.0471518	0.0495015	0.340826	0.788534
FBgn0000382	csw	10.7677	0.0761753	0.0890408	0.392269	0.815935
FBgn0000384	cta	10.4825	-0.0165959	0.0614847	0.787222	0.961442
FBgn0000394	cv	10.0174	-0.0729204	0.0655524	0.265967	0.739224
FBgn0000395	cv-2	9.89583	-0.127354	0.091705	0.164915	0.629542
FBgn0000404	CycA	12.4878	0.00766892	0.0608879	0.89977	0.983717
FBgn0000405	CycB	12.6531	0.186253	0.0501257	0.000202626	0.00731148
FBgn0000406	Cyt-b5-r	3.65565	-4.79902	1.92976	0.0128883	0.164111
FBgn0000411	D	0.995697	0.161437	1.45876	0.91188	0.985364
FBgn0000412	D1	14.0332	0.0975564	0.0499728	0.0509154	0.367172
FBgn0000414	Dab	11.0145	0.0473382	0.11519	0.681104	0.931331
FBgn0000416	Sap-r	13.0322	0.186552	0.0669431	0.00532425	0.0928248
FBgn0000422	Ddc	5.97706	-3.25674	0.799569	4.63876e-05	0.00209777
FBgn0000426	SmF	10.8262	0.124308	0.11616	0.284557	0.751753
FBgn0000442	Pkg21D	-0.390371	0	5.20164	1	NA
FBgn0000447	Dhod	10.8794	0.0756547	0.0700444	0.280099	0.747874
FBgn0000448	Hr3	5.54339	0.100938	1.79039	0.955041	0.993701
FBgn0000449	dib	4.39054	-0.478033	0.499756	0.338804	0.786994
FBgn0000451	ect	4.62224	0.499363	0.408477	0.221519	0.692906
FBgn0000454	Dip-B	11.6796	0.272472	0.0972247	0.00507086	0.0891577
FBgn0000455	Dip-C	9.60112	0.0519657	0.0624127	0.405062	0.823768
FBgn0000459	disco	6.82616	0.275389	0.130086	0.0342625	0.298036
FBgn0000463	Dl	11.9428	-0.0119754	0.102723	0.907193	0.98481
FBgn0000464	Lar	7.82011	-0.117338	0.113858	0.302745	0.765037
FBgn0000473	Cyp6a2	1.30588	-2.55095	1.62004	0.115345	0.543703
FBgn0000477	DNaseII	2.98083	-1.73945	1.49334	0.244099	0.719624
FBgn0000479	dnc	8.86489	-0.207441	0.126842	0.10196	0.514346
FBgn0000482	dor	9.9839	0.0226287	0.0729998	0.756574	0.95535
FBgn0000489	Pka-C3	8.89202	0.10821	0.169452	0.523092	0.88682
FBgn0000490	dpp	10.6046	0.121968	0.0748062	0.103007	0.517585
FBgn0000492	Dr	11.2918	0.11473	0.078233	0.142508	0.596048
FBgn0000499	dsh	10.6516	0.044039	0.0604973	0.466644	0.855718
FBgn0000504	dsx	10.7241	0.103941	0.0777103	0.181043	0.650693
FBgn0000520	dwg	9.39659	-0.0757577	0.0767755	0.323769	0.779666
FBgn0000524	dx	11.7241	-0.0172654	0.0773996	0.823482	0.96792
FBgn0000527	e	4.53412	2.8756	1.27659	0.0242869	0.241937
FBgn0000533	ea	8.71531	-0.438454	0.211645	0.0382984	0.314661
FBgn0000535	eag	-1.28089	2.73879	4.19845	0.514186	NA
FBgn0000536	eas	10.3904	-0.0341562	0.0487237	0.483292	0.865313
FBgn0000541	E(bx)	13.0318	0.0450351	0.120185	0.707874	0.937706
FBgn0000542	ec	12.944	0.0650189	0.130024	0.617037	0.914429
FBgn0000543	ecd	10.339	-0.0212105	0.0650769	0.744477	0.952048
FBgn0000546	EcR	11.5806	-0.231544	0.170194	0.17368	0.640568
FBgn0000547	ed	13.6984	-0.00865215	0.093512	0.926281	0.988008
FBgn0000551	Edg78E	2.70317	-0.214791	0.914979	0.814403	0.96599
FBgn0000557	eEF1alpha2	10.688	-0.803273	0.44809	0.0730273	0.438164
FBgn0000559	eEF2	16.7355	-0.0119829	0.0442405	0.786501	0.961442
FBgn0000560	eg	5.72429	0.254746	0.246961	0.302296	0.765037
FBgn0000562	egl	11.1431	0.0849028	0.0909957	0.350798	0.794559
FBgn0000565	MsrA	10.4595	0.00679443	0.105372	0.948588	0.991379
FBgn0000566	Eip55E	10.6718	-0.110917	0.0752426	0.140449	0.59316
FBgn0000567	Eip74EF	11.3698	-0.15575	0.103428	0.132099	0.576719
FBgn0000568	Eip75B	11.834	0.234883	0.200043	0.24033	0.714968
FBgn0000575	emc	13.0167	0.117731	0.0816689	0.149424	0.605886
FBgn0000576	ems	10.2023	0.173908	0.0763549	0.0227491	0.234418
FBgn0000577	en	10.816	0.085646	0.0820863	0.296779	0.761509
FBgn0000578	ena	11.9683	0.131088	0.124406	0.292015	0.757499
FBgn0000579	Eno	13.4807	0.00584986	0.073846	0.93686	0.989508
FBgn0000581	E(Pc)	12.2217	0.0503748	0.121696	0.678917	0.93106
FBgn0000588	esc	8.62988	-0.145549	0.11837	0.218841	0.691163
FBgn0000591	E(spl)m8-HLH	8.98237	-0.142074	0.146377	0.331747	0.783147
FBgn0000592	Est-6	0.918796	-2.93218	1.93859	0.130398	0.574638
FBgn0000594	Est-P	3.97272	-2.103	0.791198	0.00786056	0.120139
FBgn0000611	exd	12.865	-0.00820727	0.0515595	0.873527	0.977761
FBgn0000615	exu	5.06082	-0.318239	0.263563	0.227258	0.700316
FBgn0000617	e(y)1	9.54544	-0.0396073	0.0691278	0.566673	0.900712
FBgn0000618	e(y)2	9.0971	0.0568272	0.114517	0.619729	0.91508
FBgn0000625	eyg	10.1646	-0.0437733	0.0686553	0.523746	0.886917
FBgn0000629	E(z)	10.1314	-0.120707	0.0658753	0.0668979	0.420498
FBgn0000633	CG17716	2.83591	-1.54207	0.847662	0.0688796	0.424088
FBgn0000635	Fas2	12.4108	0.120931	0.100254	0.227723	0.700832
FBgn0000636	Fas3	13.9192	0.0921323	0.0628634	0.142758	0.596229
FBgn0000639	Fbp1	12.5443	-1.10305	1.41631	0.436084	0.840515
FBgn0000640	Fbp2	10.0369	-2.77956	1.31143	0.0340496	0.297066
FBgn0000644	Fcp3C	5.42921	0.36077	0.216467	0.0955891	0.495456
FBgn0000658	fj	12.5177	0.0432948	0.0576519	0.452671	0.84906
FBgn0000659	fkh	0.252532	-0.729794	2.92092	0.802703	NA
FBgn0000662	fl(2)d	11.3755	0.0027344	0.0720454	0.969724	0.996851
FBgn0000667	Actn	12.0955	-0.0135195	0.0536599	0.801081	0.963977
FBgn0000709	fliI	10.0682	0.147876	0.0872209	0.0899952	0.484402
FBgn0000711	flw	10.4891	0.0630888	0.0699725	0.367257	0.801391
FBgn0000719	fog	8.72611	0.0416585	0.142347	0.769787	0.958047
FBgn0000721	for	10.9197	0.135058	0.0725085	0.0625113	0.406867
FBgn0000723	FER	11.4375	0.23244	0.0984964	0.0182806	0.204443
FBgn0000808	gd	3.74797	-3.61596	0.672772	7.67051e-08	7.02971e-06
FBgn0000810	fs(1)K10	9.98421	0.0723495	0.0742304	0.329728	0.782078
FBgn0000826	png	4.83576	-0.0577011	0.290946	0.842793	0.970325
FBgn0000928	fs(1)Yb	3.75182	-0.159104	0.502311	0.751438	0.953675
FBgn0000996	dup	10.6002	0.0127662	0.0958266	0.894018	0.982764
FBgn0001075	ft	13.3606	-0.00928502	0.136162	0.945633	0.990891
FBgn0001078	ftz-f1	8.65299	-0.785796	0.451674	0.0819047	0.461563
FBgn0001079	fu	9.9286	0.0679532	0.0685364	0.321446	0.779666
FBgn0001083	fw	10.3029	0.0863852	0.0714006	0.22633	0.698973
FBgn0001084	fy	9.28712	-0.0818401	0.0640361	0.201239	0.675274
FBgn0001085	fz	11.5804	-0.0318257	0.0758048	0.674604	0.929968
FBgn0001086	fzy	11.2325	0.0526767	0.081053	0.515754	0.884049
FBgn0001087	g	10.9674	0.0479029	0.0944349	0.611974	0.912734
FBgn0001089	Gal	9.93756	0.807212	0.464032	0.0819359	0.461563
FBgn0001090	bnb	13.3443	0.395753	0.147224	0.00718595	0.113615
FBgn0001091	Gapdh1	12.4929	0.200893	0.0984382	0.0412703	0.326837
FBgn0001092	Gapdh2	13.8396	0.0881843	0.0768245	0.251024	0.725335
FBgn0001098	Gdh	13.145	-0.0524702	0.0662933	0.428661	0.83618
FBgn0001099	gdl	3.55195	-0.601833	0.359271	0.093905	0.492947
FBgn0001104	Galphai	12.3831	-0.0660515	0.0512637	0.197583	0.67091
FBgn0001105	Gbeta13F	12.8023	0.0839945	0.0872437	0.335669	0.784663
FBgn0001108	DCTN1-p150	10.822	0.0713732	0.12247	0.560041	0.89671
FBgn0001112	Gld	8.63647	-0.0214219	0.527356	0.967598	0.996167
FBgn0001114	Glt	11.4566	0.429752	0.245218	0.0796829	0.45768
FBgn0001122	Galphao	10.0789	0.0409473	0.0897966	0.648389	0.922352
FBgn0001123	Galphas	11.6386	-0.0169452	0.039273	0.666125	0.927684
FBgn0001124	Got1	11.3701	0.175405	0.0423008	3.37429e-05	0.00158118
FBgn0001125	Got2	11.5536	0.0493933	0.0742696	0.506016	0.879687
FBgn0001128	Gpdh1	8.52691	0.0213816	0.0866125	0.805013	0.964589
FBgn0001133	grau	8.98648	-0.031007	0.0825595	0.707235	0.937706
FBgn0001134	Grd	-0.964075	-0.729795	2.18887	0.738823	NA
FBgn0001137	grk	3.90074	-0.0103664	0.370045	0.977651	0.998254
FBgn0001138	grn	11.2967	0.0984799	0.0924074	0.286553	0.7528
FBgn0001139	gro	12.7578	0.0508871	0.0649782	0.433544	0.838115
FBgn0001142	Gs1	9.62996	0.33439	0.63118	0.59626	0.908333
FBgn0001145	Gs2	8.44806	-0.608371	0.418015	0.145564	0.600102
FBgn0001147	gsb-n	0.508781	1.1082	1.54399	0.472912	0.858755
FBgn0001148	gsb	0.574574	0.312021	1.22835	0.799482	0.963061
FBgn0001149	GstD1	14.143	0.321235	0.10007	0.0013268	0.0331893
FBgn0001150	gt	5.23256	-0.47766	0.309552	0.122814	0.560045
FBgn0001168	h	10.4835	0.026673	0.0794028	0.736931	0.948184
FBgn0001169	H	11.4094	0.0394293	0.107565	0.713946	0.938688
FBgn0001170	H2.0	5.87211	-0.00782442	0.213502	0.970766	0.996851
FBgn0001174	halo	-1.07948	-0.00201271	2.97184	0.99946	NA
FBgn0001179	hay	9.67508	0.0887633	0.0637071	0.163528	0.627207
FBgn0001185	her	9.72417	0.0633151	0.0617201	0.304966	0.767119
FBgn0001186	Hex-A	11.1357	-0.0289174	0.0708962	0.68336	0.93147
FBgn0001187	Hex-C	1.13391	-0.00755929	1.1939	0.994948	1
FBgn0001189	hfw	10.6268	-0.00643218	0.0581673	0.911949	0.985364
FBgn0001197	His2Av	13.3915	0.0357256	0.0708291	0.613986	0.91363
FBgn0001202	hook	9.35367	-0.0686959	0.0946098	0.46778	0.855718
FBgn0001206	Hmr	9.77549	-0.0129236	0.0916504	0.887862	0.980715
FBgn0001208	Hn	6.15388	-2.06198	0.808788	0.0107887	0.147593
FBgn0001215	Hrb98DE	13.6366	0.0889236	0.0616395	0.149122	0.605135
FBgn0001216	Hsc70-1	0.464233	-0.0247273	1.31468	0.984994	0.999747
FBgn0001217	Hsc70-2	8.44222	-11.8776	1.06138	4.52514e-29	4.68623e-26
FBgn0001218	Hsc70-3	14.3451	0.109696	0.255726	0.667952	0.928249
FBgn0001220	Hsc70-5	12.0814	-0.0126412	0.0524828	0.809661	0.965858
FBgn0001222	Hsf	10.9767	0.130148	0.0514529	0.0114236	0.15206
FBgn0001224	Hsp23	15.5308	0.283388	0.220768	0.199265	0.673274
FBgn0001225	Hsp26	13.0168	0.027192	0.407212	0.94676	0.991112
FBgn0001226	Hsp27	15.5739	0.201666	0.182166	0.268274	0.739683
FBgn0001227	Hsp67Ba	12.6655	0.0269399	0.185637	0.884615	0.979602
FBgn0001229	Hsp67Bc	6.27722	-2.0291	0.723367	0.00503039	0.0885964
FBgn0001230	Hsp68	10.6428	-0.870022	0.804802	0.27968	0.747836
FBgn0001233	Hsp83	15.7348	-0.0578219	0.183973	0.753297	0.954152
FBgn0001234	lncRNA:Hsromega	11.2025	-0.227005	0.256689	0.376503	0.807928
FBgn0001235	hth	13.3779	-0.0389626	0.0978459	0.69048	0.932887
FBgn0001247	Ide	10.5984	0.0107448	0.0611271	0.860469	0.974819
FBgn0001248	Idh	13.5742	0.135244	0.0565311	0.0167398	0.193577
FBgn0001250	if	10.992	0.198817	0.127864	0.119969	0.555013
FBgn0001253	ImpE1	12.4147	0.408976	0.613745	0.505179	0.878676
FBgn0001254	ImpE2	15.967	0.164825	0.383751	0.667552	0.927937
FBgn0001255	ImpE3	11.4676	0.192838	0.419203	0.645509	0.921533
FBgn0001256	ImpL1	5.14333	0.692451	0.753446	0.358072	0.796308
FBgn0001257	ImpL2	8.45185	0.34823	0.204456	0.0885295	0.481014
FBgn0001258	Ldh	8.6906	-0.0811472	0.400474	0.839426	0.969909
FBgn0001259	in	10.4291	-0.0282571	0.0745039	0.704487	0.937706
FBgn0001263	inaD	4.7441	-0.453676	0.349837	0.194693	0.668738
FBgn0001269	inv	11.0796	0.0915125	0.0852491	0.28306	0.750286
FBgn0001276	ix	8.47553	-0.0494777	0.121357	0.683492	0.93147
FBgn0001280	janA	11.0918	-0.022925	0.0709945	0.746762	0.952397
FBgn0001281	janB	0.558124	1.03769	1.27719	0.416519	0.829596
FBgn0001285	Jon44E	1.30024	-1.43924	5.16279	0.78042	0.959909
FBgn0001291	Jra	9.83422	0.0808877	0.0925001	0.381867	0.810707
FBgn0001296	kar	8.61778	0.165624	0.179567	0.356344	0.795625
FBgn0001297	kay	11.1456	0.127435	0.0820883	0.120564	0.556398
FBgn0001301	kel	11.0794	-0.0160237	0.0728108	0.825815	0.968525
FBgn0001308	Khc	12.0507	0.10407	0.0928795	0.262508	0.735725
FBgn0001311	kkv	12.6862	-0.152813	0.0883652	0.0837487	0.466332
FBgn0001316	klar	13.4813	0.0927139	0.108093	0.391044	0.815935
FBgn0001319	kn	9.68076	0.321623	0.140306	0.0218886	0.229864
FBgn0001320	kni	9.7804	0.115743	0.085156	0.174086	0.640666
FBgn0001321	knk	10.8941	-0.0857219	0.0854355	0.315691	0.774323
FBgn0001323	knrl	8.91921	0.242901	0.115352	0.0352267	0.303048
FBgn0001324	kto	11.673	0.0703567	0.119676	0.556603	0.895755
FBgn0001325	Kr	2.24081	-2.25406	1.63798	0.168784	0.634098
FBgn0001330	kz	9.55077	-0.0314367	0.0766019	0.68152	0.931331
FBgn0001341	Mybbp1A	10.6659	0.0318996	0.0815304	0.695605	0.935153
FBgn0001404	egh	10.0309	0.0507547	0.0979259	0.604251	0.91219
FBgn0001491	l(1)10Bb	9.76885	-0.0379857	0.0742584	0.608977	0.912593
FBgn0001565	Hlc	10.9251	-0.00690892	0.0762043	0.92776	0.98828
FBgn0001612	Grip91	10.0753	0.00661269	0.0724312	0.927257	0.98825
FBgn0001624	dlg1	11.898	0.00104666	0.0983174	0.991506	0.999747
FBgn0001941	ifc	10.1799	0.0804322	0.0459873	0.0802898	0.458511
FBgn0001942	eIF4A	15.7635	0.00383869	0.0638341	0.952048	0.992455
FBgn0001961	Arpc1	11.4432	0.128402	0.0609033	0.0350052	0.302347
FBgn0001965	Sos	11.0635	-0.139949	0.131585	0.287527	0.753157
FBgn0001967	NimC3	6.31441	0.967792	0.386715	0.0123285	0.160193
FBgn0001970	Pgant35A	8.73828	0.0944666	0.115671	0.414108	0.827692
FBgn0001977	CIAPIN1	10.4372	0.17318	0.0695571	0.0127834	0.163439
FBgn0001978	stc	11.2086	-0.00936155	0.0543734	0.863303	0.974819
FBgn0001981	esg	10.2162	-0.0607424	0.0760834	0.424658	0.834933
FBgn0001983	wor	2.58564	-0.261247	0.643567	0.684789	0.931555
FBgn0001986	Mtr4	10.4737	-0.0331855	0.0705902	0.638273	0.920094
FBgn0001987	Gli	12.1553	0.152995	0.114412	0.181146	0.650693
FBgn0001989	ND-B17	10.328	-0.170382	0.0929104	0.0666786	0.419771
FBgn0001990	wek	8.88122	-0.129733	0.0720488	0.0717629	0.433845
FBgn0001991	Ca-alpha1D	1.79204	-0.0428384	1.06802	0.968005	0.996269
FBgn0001992	Cyp303a1	3.2698	0.226549	0.431308	0.599403	0.908931
FBgn0001994	crp	12.2109	0.0709337	0.0869909	0.414834	0.828069
FBgn0001995	mRpL4	9.40989	-0.0174295	0.084177	0.835965	0.969196
FBgn0002021	l(2)37Bb	8.66435	-0.0298923	0.0986858	0.761963	0.95632
FBgn0002022	Catsup	11.4027	0.0297159	0.0622719	0.633222	0.917173
FBgn0002031	l(2)37Cc	12.0841	0.0134274	0.0645705	0.835268	0.969196
FBgn0002036	CG10561	6.89195	0.13638	0.134944	0.312189	0.773436
FBgn0002044	swm	11.345	0.00816975	0.086999	0.925184	0.987859
FBgn0002069	AspRS	12.2116	0.0353422	0.0396419	0.372641	0.803972
FBgn0002121	l(2)gl	12.7595	-0.0313634	0.0923385	0.734115	0.946565
FBgn0002174	CG5504	10.062	-0.217492	0.0856079	0.0110676	0.149825
FBgn0002183	dre4	12.8588	0.0513734	0.0658228	0.435108	0.839884
FBgn0002283	l(3)73Ah	9.53728	0.0187997	0.0696765	0.787304	0.961442
FBgn0002284	Prosbeta6	11.7035	0.0432465	0.0836228	0.605043	0.912593
FBgn0002306	sas	12.2901	-0.00791928	0.107772	0.941423	0.989696
FBgn0002354	l(3)87Df	6.68718	-0.29918	0.159061	0.059983	0.398307
FBgn0002413	dco	12.1597	0.0850698	0.065581	0.194572	0.668721
FBgn0002431	hyd	12.5708	0.0315764	0.112354	0.778677	0.959909
FBgn0002440	l(3)mbn	0.513122	-2.42754	1.97025	0.217912	0.689518
FBgn0002441	l(3)mbt	10.4804	-0.0242393	0.082087	0.767774	0.957613
FBgn0002466	sti	12.113	0.0651022	0.123318	0.597555	0.908728
FBgn0002521	pho	11.3739	0.0282931	0.063169	0.654229	0.924306
FBgn0002522	lab	2.0162	0.821243	1.0484	0.433436	0.838115
FBgn0002524	lace	10.3029	0.0226823	0.069285	0.743383	0.951408
FBgn0002525	Lam	13.982	0.0705958	0.0615786	0.251616	0.725629
FBgn0002526	LanA	13.4382	0.078005	0.100668	0.438412	0.842493
FBgn0002531	Lcp1	8.88121	-3.77699	1.28824	0.00336903	0.0657056
FBgn0002533	Lcp2	7.07498	-2.85734	0.882114	0.00119869	0.0307502
FBgn0002534	Lcp3	5.9124	-1.97681	1.6461	0.229788	0.702708
FBgn0002535	Lcp4	7.88793	-2.85796	1.24456	0.0216555	0.228495
FBgn0002542	lds	11.3159	0.0756819	0.0750828	0.313465	0.774323
FBgn0002543	robo2	12.2402	0.0177957	0.167788	0.915534	0.986438
FBgn0002552	lin	10.3399	0.127392	0.0890168	0.152401	0.608899
FBgn0002561	l(1)sc	1.45885	-0.309602	0.896617	0.729869	0.944642
FBgn0002562	Lsp1alpha	9.94924	-2.32177	1.3205	0.0787044	0.456026
FBgn0002563	Lsp1beta	11.4315	-4.21843	1.35077	0.00179035	0.0422343
FBgn0002564	Lsp1gamma	11.0847	-1.98126	1.32027	0.133446	0.578471
FBgn0002565	Lsp2	11.5039	-4.68639	1.3396	0.000468124	0.0147612
FBgn0002566	lt	10.9991	-0.0303357	0.067592	0.653572	0.924265
FBgn0002567	Rab32	8.50977	-0.087342	0.289795	0.763115	0.956643
FBgn0002573	sens	7.1852	0.161391	0.238952	0.499413	0.874226
FBgn0002576	lz	2.31683	0.15405	0.676869	0.819964	0.966816
FBgn0002577	m	6.8749	0.155496	0.906396	0.863788	0.974819
FBgn0002578	Kaz-m1	0.418952	0.438055	1.82879	0.810692	0.96599
FBgn0002579	RpL36	14.9225	-0.0205197	0.0816311	0.801527	0.96415
FBgn0002590	RpS5a	15.6556	-0.0149006	0.0769627	0.846483	0.971753
FBgn0002592	E(spl)m2-BFM	10.0966	-0.193103	0.175869	0.272207	0.743575
FBgn0002593	RpLP1	15.3493	0.128103	0.096132	0.182671	0.652549
FBgn0002609	E(spl)m3-HLH	10.0514	-0.497151	0.0906519	4.15386e-08	3.91067e-06
FBgn0002622	RpS3	15.4226	-0.00512263	0.0763438	0.946503	0.991112
FBgn0002626	RpL32	14.9463	-0.081034	0.104851	0.439611	0.843858
FBgn0002629	E(spl)m4-BFM	9.32981	-0.0912207	0.132046	0.489675	0.869657
FBgn0002631	E(spl)m5-HLH	4.64661	0.42605	0.309547	0.168708	0.634098
FBgn0002632	E(spl)m6-BFM	8.24416	-0.0719897	0.145034	0.619638	0.91508
FBgn0002633	E(spl)m7-HLH	9.45472	-0.153697	0.113491	0.175653	0.642891
FBgn0002638	Rcc1	11.8678	0.0782349	0.0827992	0.344723	0.790385
FBgn0002641	mal	9.34458	0.238375	0.0691609	0.000567547	0.0173378
FBgn0002643	mam	11.7456	0.0666385	0.180609	0.712153	0.937706
FBgn0002645	Map205	12.9317	0.00103483	0.0837608	0.990143	0.999747
FBgn0002673	twe	7.04789	-0.0319508	0.189602	0.866178	0.975248
FBgn0002707	mei-9	9.48771	0.040379	0.08413	0.631256	0.917173
FBgn0002709	mei-218	6.23995	-0.23797	0.24526	0.331907	0.783147
FBgn0002715	mei-S332	8.61869	0.0406474	0.0964026	0.673286	0.929272
FBgn0002716	mei-W68	3.32419	0.680174	0.594007	0.252184	0.725919
FBgn0002719	Men	9.9182	0.0955088	0.10104	0.34453	0.790385
FBgn0002723	Met	8.90278	-0.0797778	0.106823	0.455169	0.850337
FBgn0002732	E(spl)malpha-BFM	11.3281	-0.0362255	0.124405	0.770906	0.958489
FBgn0002733	E(spl)mbeta-HLH	11.1083	-0.0431685	0.110392	0.695762	0.935153
FBgn0002734	E(spl)mdelta-HLH	9.00468	-0.31926	0.10212	0.00177014	0.0420071
FBgn0002735	E(spl)mgamma-HLH	7.03102	-0.0363307	0.220674	0.869231	0.975808
FBgn0002736	mago	10.9995	0.0872837	0.0783925	0.265528	0.738601
FBgn0002772	Mlc1	3.00718	-2.95503	0.998841	0.00309178	0.061574
FBgn0002773	Mlc2	6.65415	-1.28948	0.30817	2.8604e-05	0.00136508
FBgn0002774	mle	11.2829	0.133957	0.0622001	0.0312678	0.281328
FBgn0002775	msl-3	9.44425	0.0264755	0.0835757	0.751407	0.953675
FBgn0002778	mnd	9.91943	0.195228	0.16048	0.223785	0.69637
FBgn0002780	mod	13.2718	-0.0957283	0.0780924	0.220261	0.69184
FBgn0002781	mod(mdg4)	13.2997	0.0970173	0.0510279	0.0572678	0.390946
FBgn0002783	mor	12.8779	0.0613951	0.0718407	0.392773	0.816281
FBgn0002787	Rpn8	11.738	0.0673554	0.0789285	0.393453	0.816717
FBgn0002789	Mp20	3.86509	-1.7374	0.768585	0.023789	0.240124
FBgn0002791	mr	10.1105	0.013893	0.0602571	0.817656	0.96599
FBgn0002838	ms(3)K81	-1.14623	1.69083	3.58713	0.637384	NA
FBgn0002862	Mst87F	0.924605	-0.236433	1.10651	0.830801	0.968983
FBgn0002863	Acp95EF	2.033	-0.195712	0.864657	0.820932	0.967116
FBgn0002868	MtnA	5.54099	0.783714	0.306901	0.0106604	0.146385
FBgn0002869	MtnB	2.19145	1.28181	1.19981	0.285364	0.752391
FBgn0002872	mu2	10.3468	-0.0231915	0.106652	0.827857	0.968952
FBgn0002873	mud	11.8709	0.0808242	0.0918959	0.37912	0.809427
FBgn0002878	mus101	9.66627	0.00791671	0.110169	0.942713	0.989801
FBgn0002887	mus201	9.28586	-0.442277	0.111784	7.60469e-05	0.00326781
FBgn0002891	DNApol-zeta	9.00195	0.138699	0.13736	0.312618	0.773797
FBgn0002899	mus301	9.01898	0.123682	0.0988488	0.210853	0.685127
FBgn0002901	mus304	8.40277	-0.0696379	0.0820062	0.395782	0.818129
FBgn0002905	DNApol-theta	9.7033	0.139538	0.108101	0.19677	0.670444
FBgn0002906	Blm	10.1324	0.00568205	0.10429	0.95655	0.994023
FBgn0002917	na	1.05792	1.70761	1.56957	0.276617	0.746144
FBgn0002921	Atpalpha	13.724	0.123045	0.0485335	0.0112365	0.150927
FBgn0002922	nau	4.35878	-0.401639	0.336385	0.232483	0.706474
FBgn0002924	ncd	11.4221	0.00522518	0.0985409	0.957712	0.994201
FBgn0002926	ndl	-1.26512	1.37413	3.52983	0.697061	NA
FBgn0002930	nec	4.65019	-1.83231	0.625212	0.00338199	0.0657214
FBgn0002931	net	8.8144	0.100487	0.112608	0.372199	0.803877
FBgn0002932	neur	8.92731	0.181898	0.106787	0.0884982	0.481014
FBgn0002936	ninaA	0.405696	-2.49093	1.78797	0.163571	0.627207
FBgn0002938	ninaC	5.30982	0.166043	0.264909	0.530793	0.889262
FBgn0002939	ninaD	2.01618	-0.737374	0.880026	0.402087	0.821335
FBgn0002941	slou	0.639388	-0.373516	1.3113	0.775763	0.959596
FBgn0002945	nkd	12.0539	0.0550125	0.104928	0.60008	0.909329
FBgn0002948	nod	9.68106	0.115137	0.083795	0.169433	0.634098
FBgn0002962	nos	2.72424	0.2111	0.674323	0.754239	0.954527
FBgn0002973	numb	12.1271	0.0638875	0.0593004	0.281322	0.748365
FBgn0002985	odd	8.01643	-0.0775874	0.118756	0.513541	0.883281
FBgn0002989	okr	8.61737	0.0366283	0.0905509	0.685841	0.931555
FBgn0003002	opa	8.91842	0.324061	0.0971099	0.000846722	0.0238279
FBgn0003008	or	8.9234	-0.00598696	0.0786443	0.939318	0.989696
FBgn0003009	ord	-0.715176	0.406723	2.60548	0.875952	NA
FBgn0003016	osp	9.57635	0.039881	0.159385	0.802418	0.96415
FBgn0003023	otu	0.737551	0.381328	1.08573	0.725425	0.943842
FBgn0003028	ovo	12.0512	0.019316	0.119601	0.871697	0.977192
FBgn0003041	pbl	11.4148	-0.014328	0.084976	0.866102	0.975248
FBgn0003042	Pc	9.06597	0.0179908	0.069471	0.79566	0.96252
FBgn0003044	Pcl	11.1703	0.0967171	0.0867795	0.265058	0.737688
FBgn0003046	Pcp	4.67299	-2.51122	0.973055	0.00985836	0.139854
FBgn0003048	pcx	10.6023	0.242488	0.165518	0.142912	0.596229
FBgn0003053	peb	7.10557	-0.0055877	0.229156	0.980546	0.998971
FBgn0003060	CG9757	3.66223	-0.400278	3.16361	NA	NA
FBgn0003062	Fib	12.3325	-0.191161	0.0846514	0.0239321	0.24086
FBgn0003065	CG2150	2.80436	-0.480054	0.586216	0.412841	0.826551
FBgn0003068	per	2.02982	1.63034	0.745531	0.0287558	0.266454
FBgn0003071	Pfk	11.8359	0.0843429	0.0683586	0.217266	0.689231
FBgn0003074	Pgi	11.5164	-0.0435674	0.0625752	0.486278	0.867534
FBgn0003076	Pgm1	9.44125	-0.0816726	0.0751007	0.276813	0.746144
FBgn0003079	Raf	10.244	0.0360153	0.0635889	0.571137	0.902282
FBgn0003082	phr	8.51128	-0.111409	0.12078	0.35631	0.795625
FBgn0003086	Pig1	-1.10107	0.712889	5.04819	0.887699	NA
FBgn0003087	pim	9.74782	-0.020838	0.0921287	0.821059	0.967116
FBgn0003089	pip	9.04727	0.310965	0.192969	0.107076	0.528791
FBgn0003090	pk	11.1422	0.17056	0.112057	0.12799	0.57009
FBgn0003091	Pkc53E	3.68785	0.0641461	0.831068	0.938476	0.989696
FBgn0003093	Pkc98E	11.0181	0.142354	0.0810642	0.0790771	0.456188
FBgn0003116	pn	6.81586	-0.261839	0.144433	0.0698501	0.428028
FBgn0003117	pnr	9.80539	-0.0660535	0.0699434	0.344973	0.79056
FBgn0003118	pnt	9.77623	0.112956	0.0994923	0.256239	0.729151
FBgn0003124	polo	12.8519	0.0878787	0.0425754	0.0390111	0.317854
FBgn0003129	Poxm	0.750886	0.944287	1.0783	0.381181	0.810411
FBgn0003130	Poxn	7.99213	0.314013	0.108255	0.00372366	0.069859
FBgn0003134	Pp1alpha-96A	10.3743	0.0531709	0.0655205	0.41707	0.829596
FBgn0003137	Ppn	13.1743	0.212656	0.236706	0.368973	0.801739
FBgn0003139	PpV	10.3142	-0.0612309	0.0480619	0.202663	0.676218
FBgn0003141	pr	9.75758	0.0471303	0.0827265	0.568873	0.901822
FBgn0003149	Prm	4.18795	-1.68367	0.697203	0.0157401	0.185745
FBgn0003159	CG2841	7.66391	-0.0276123	0.138087	0.84151	0.970325
FBgn0003162	Pu	7.87957	0.315808	0.161569	0.0506272	0.36664
FBgn0003165	pum	12.321	0.0303527	0.129158	0.814205	0.96599
FBgn0003169	put	11.5947	-0.00326579	0.0432095	0.939753	0.989696
FBgn0003174	pwn	11.1779	0.17032	0.145491	0.241736	0.715875
FBgn0003175	px	10.8915	0.128331	0.119159	0.281494	0.748365
FBgn0003187	qua	3.61894	0.877149	0.566942	0.121825	0.558418
FBgn0003189	r	11.8709	-0.150121	0.0998208	0.132605	0.576998
FBgn0003204	ras	11.848	-0.0499039	0.0570947	0.382089	0.810843
FBgn0003205	Ras85D	12.197	0.0890054	0.0423027	0.0353773	0.303535
FBgn0003206	Ras64B	10.6516	0.776402	0.0513626	1.26857e-51	3.28432e-48
FBgn0003209	raw	10.2461	0.109042	0.0962393	0.257201	0.729545
FBgn0003210	rb	11.1919	0.108387	0.088868	0.222601	0.694445
FBgn0003218	rdgB	7.78329	0.17686	0.173069	0.306825	0.768492
FBgn0003227	rec	8.89894	0.175221	0.0946426	0.0641123	0.412096
FBgn0003231	ref(2)P	10.8857	0.00881424	0.0527979	0.867415	0.975454
FBgn0003250	Rh4	1.54654	0.825207	0.885214	0.351227	0.794664
FBgn0003255	rk	6.20111	0.14629	0.340055	0.667054	0.927937
FBgn0003256	rl	10.5537	0.152614	0.0875298	0.0812338	0.459955
FBgn0003257	r-l	10.4714	-0.0535038	0.066395	0.420335	0.831675
FBgn0003261	Rm62	15.5946	-0.0567742	0.0924304	0.539059	0.891487
FBgn0003267	ro	-1.25199	-0.729795	2.4205	0.763029	NA
FBgn0003268	rod	11.4082	-0.0033456	0.122458	0.978204	0.998254
FBgn0003274	RpLP2	15.3802	0.072591	0.102736	0.47983	0.863247
FBgn0003275	RpII18	10.727	-0.061981	0.0897621	0.489878	0.869657
FBgn0003277	RpII215	12.5876	0.122054	0.0910919	0.180277	0.650052
FBgn0003278	RpI135	10.0528	-0.116903	0.0791354	0.139608	0.591202
FBgn0003279	RpL4	16.1832	-0.0118229	0.0671685	0.86028	0.974819
FBgn0003285	rst	10.0094	-0.00367915	0.0818142	0.964132	0.995171
FBgn0003292	rt	9.53763	0.505764	0.235988	0.0320993	0.284851
FBgn0003295	ru	3.84564	-0.207245	0.551134	0.706892	0.937706
FBgn0003300	run	0.0554388	-0.421608	1.89487	0.823925	NA
FBgn0003301	rut	10.6443	-0.0139999	0.138892	0.919711	0.986624
FBgn0003302	rux	8.38414	0.0301617	0.101039	0.76531	0.956961
FBgn0003308	ry	4.88219	-1.5384	0.451035	0.000647667	0.0190546
FBgn0003310	S	10.9202	0.172264	0.0858799	0.0448699	0.341899
FBgn0003312	sad	6.32649	-0.519024	0.704114	NA	NA
FBgn0003317	sax	10.6552	-0.00832997	0.0501543	0.868089	0.975454
FBgn0003319	Sb	10.7401	0.535189	0.309041	0.0833134	0.46597
FBgn0003321	sbr	11.0773	0.0426118	0.0502759	0.396684	0.818529
FBgn0003326	sca	10.4538	0.0927814	0.102215	0.364031	0.799974
FBgn0003330	Sce	9.82501	-0.00642652	0.0807367	0.936557	0.989508
FBgn0003334	Scm	10.8772	-0.00672588	0.0898779	0.940347	0.989696
FBgn0003339	Scr	2.87833	-0.0914129	0.577435	0.874214	0.978001
FBgn0003345	sd	12.8864	0.0648893	0.0955935	0.497262	0.873265
FBgn0003346	RanGAP	11.8174	0.00169792	0.0902574	0.984991	0.999747
FBgn0003353	sei	9.16123	0.126608	0.0807731	0.117009	0.549047
FBgn0003356	Jon99Cii	3.6919	1.18059	1.79929	0.511732	0.882147
FBgn0003357	Jon99Ciii	3.80803	1.76715	1.80249	0.326893	0.780924
FBgn0003358	Jon99Ci	-0.671205	0.509723	2.39833	0.831692	NA
FBgn0003360	sesB	14.6175	0.0715709	0.0497411	0.150188	0.60673
FBgn0003366	sev	2.91769	-3.02561	1.13434	0.00764694	0.11802
FBgn0003371	sgg	12.0091	0.11222	0.130749	0.390735	0.815935
FBgn0003372	Sgs1	4.92613	-19.5421	5.02437	NA	NA
FBgn0003373	Sgs3	7.96496	-3.31608	1.78075	NA	NA
FBgn0003374	Sgs4	6.7304	-2.47624	1.90701	NA	NA
FBgn0003375	Sgs5	7.21991	-1.88442	2.10769	NA	NA
FBgn0003377	Sgs7	8.82375	-1.69574	1.72088	NA	NA
FBgn0003378	Sgs8	7.34063	-2.16706	1.81792	NA	NA
FBgn0003380	Sh	1.51447	0.550383	1.04712	0.599157	0.908931
FBgn0003382	sha	4.06158	0.0628658	0.809722	0.938115	0.989696
FBgn0003386	Shaw	0.0193846	0.464239	1.68464	0.782877	NA
FBgn0003388	shd	5.87024	0.0401046	0.25731	0.876143	0.97859
FBgn0003390	shf	11.5524	0.105591	0.0694149	0.128221	0.570209
FBgn0003391	shg	13.3336	0.150382	0.116716	0.197593	0.67091
FBgn0003392	shi	11.6928	-0.00617197	0.088758	0.944562	0.990571
FBgn0003396	shn	11.4752	0.0143984	0.149101	0.92307	0.987859
FBgn0003401	shu	8.03331	0.077163	0.118222	0.513951	0.883321
FBgn0003410	sina	11.0612	0.0938867	0.0622743	0.131649	0.576719
FBgn0003411	sisA	0.11859	0	5.20164	1	NA
FBgn0003415	skd	11.7073	0.0960174	0.129542	0.458569	0.85244
FBgn0003416	sl	9.79613	-0.0644132	0.109131	0.555033	0.894953
FBgn0003423	slgA	11.3621	0.116263	0.112587	0.301766	0.764861
FBgn0003429	slo	0.652195	-0.674447	1.47391	0.647247	0.921533
FBgn0003435	sm	9.21145	0.242698	0.892145	0.785592	0.961342
FBgn0003444	smo	11.2254	-0.0247381	0.0494336	0.616771	0.914429
FBgn0003447	sn	12.8363	0.147311	0.138151	0.286288	0.752606
FBgn0003448	sna	1.07057	1.29331	1.24834	0.300188	0.763631
FBgn0003449	snf	10.7367	-0.0871904	0.0821706	0.288649	0.75429
FBgn0003459	stwl	9.28275	-0.054315	0.141761	0.701612	0.936725
FBgn0003460	so	8.32049	-0.180386	0.130192	0.165889	0.630257
FBgn0003462	Sod1	12.2259	-0.0980933	0.089419	0.272638	0.743879
FBgn0003463	sog	10.5674	0.109151	0.114184	0.339115	0.786994
FBgn0003464	sol	11.5568	-0.116199	0.102338	0.256188	0.729151
FBgn0003475	spir	7.60181	0.212403	0.173348	0.220463	0.69184
FBgn0003479	spn-A	8.67428	0.0187039	0.0865226	0.828853	0.968983
FBgn0003480	spn-B	7.17605	0.184069	0.207485	0.375001	0.805874
FBgn0003482	spn-D	5.78454	0.33875	0.211476	0.109192	0.531845
FBgn0003483	spn-E	6.363	1.03719	0.217624	1.87966e-06	0.00013242
FBgn0003486	spo	0.216122	-0.0451958	1.49763	0.975925	NA
FBgn0003495	spz	7.08864	0.0031648	0.199646	0.987352	0.999747
FBgn0003499	sr	8.61403	-0.0280767	0.181908	0.877337	0.97859
FBgn0003502	Btk29A	12.0424	0.0894734	0.0692407	0.196285	0.669541
FBgn0003507	srp	8.4364	0.603077	0.290969	0.0382048	0.314506
FBgn0003512	Sry-delta	10.2495	0.060366	0.0799572	0.450262	0.848419
FBgn0003513	ss	9.39864	0.0159004	0.129947	0.902613	0.983717
FBgn0003514	sqh	12.1876	0.125391	0.0627806	0.0457931	0.346409
FBgn0003515	st	3.57614	0.596859	0.381543	0.117741	0.549988
FBgn0003517	sta	16.0869	-0.0131203	0.0866971	0.879712	0.978595
FBgn0003520	stau	11.422	-0.0502641	0.10977	0.647022	0.921533
FBgn0003525	stg	11.5226	0.00323482	0.0968197	0.973347	0.997275
FBgn0003545	sub	9.97565	-0.0520758	0.126849	0.681414	0.931331
FBgn0003557	Su(dx)	10.663	0.0239176	0.0823299	0.771427	0.958489
FBgn0003559	su(f)	10.9617	0.114481	0.0497507	0.021386	0.227619
FBgn0003567	su(Hw)	11.4811	0.0518436	0.0714485	0.468079	0.855831
FBgn0003575	su(sable)	11.1267	0.0298121	0.0891363	0.738036	0.948889
FBgn0003598	Su(var)3-7	11.3433	0.043469	0.0683202	0.524611	0.887579
FBgn0003607	Su(var)205	13.0306	0.104239	0.0714501	0.144589	0.597697
FBgn0003612	Su(var)2-10	11.8033	-0.0230884	0.0450009	0.607906	0.912593
FBgn0003638	su(w[a])	12.81	0.0494548	0.0848381	0.55994	0.89671
FBgn0003651	svp	9.17465	0.0920895	0.134566	0.493757	0.871778
FBgn0003654	sw	9.84622	0.0337681	0.103785	0.744904	0.952256
FBgn0003655	swa	-0.627495	-3.12235	2.58316	0.226765	NA
FBgn0003656	sws	10.1572	0.0512614	0.0795835	0.519497	0.885893
FBgn0003660	Syb	12.1268	0.0976747	0.051888	0.0597797	0.398307
FBgn0003676	CCT1	13.0209	-0.0113347	0.0688618	0.869258	0.975808
FBgn0003687	Tbp	9.59077	0.0193125	0.0733589	0.79235	0.96252
FBgn0003701	thr	9.55604	0.0140175	0.10006	0.888588	0.980814
FBgn0003710	tipE	3.26175	-2.57161	0.827815	0.00189315	0.0437621
FBgn0003714	tko	9.67426	-0.070535	0.107804	0.512924	0.882994
FBgn0003716	tkv	13.2013	0.144369	0.0778584	0.063704	0.41104
FBgn0003719	tld	10.1309	-0.0966603	0.1524	0.525914	0.887898
FBgn0003721	Tm1	13.5245	0.0528405	0.0541115	0.328811	0.781719
FBgn0003731	Egfr	12.912	0.008228	0.0890672	0.926396	0.988029
FBgn0003733	tor	2.16345	1.92684	0.936113	0.0395577	0.319925
FBgn0003741	tra	9.03922	-0.0381304	0.103339	0.712139	0.937706
FBgn0003742	tra2	10.2646	-0.104047	0.0672673	0.121918	0.558418
FBgn0003744	trc	10.9498	0.0929599	0.0510656	0.0686979	0.423478
FBgn0003747	Gr5a	9.8343	-7.72723	0.474591	1.32744e-59	4.58232e-56
FBgn0003748	Treh	10.2796	-0.0307627	0.0944149	0.744557	0.952048
FBgn0003751	trk	1.54364	0.865128	1.10499	0.433669	0.8382
FBgn0003862	trx	12.3891	0.0722555	0.140996	0.608327	0.912593
FBgn0003863	alphaTry	2.55994	1.51464	2.08141	NA	NA
FBgn0003866	tsh	12.5473	-0.0679075	0.0620162	0.273518	0.744058
FBgn0003867	tsl	10.2404	0.22068	0.0681096	0.00119501	0.0307502
FBgn0003870	ttk	12.1606	0.182312	0.105688	0.0845274	0.469113
FBgn0003882	tub	10.4177	-0.0372804	0.0512585	0.46704	0.855718
FBgn0003884	alphaTub84B	16.1892	0.112805	0.106768	0.29072	0.756078
FBgn0003885	alphaTub84D	12.3155	0.124328	0.0762363	0.102928	0.517445
FBgn0003886	alphaTub85E	5.02975	-1.60443	0.552556	0.00368843	0.0696637
FBgn0003888	betaTub60D	12.9621	0.34555	0.276436	0.211293	0.685127
FBgn0003890	betaTub97EF	8.404	0.139054	0.224074	0.534883	0.890411
FBgn0003891	tud	12.8436	0.0278387	0.134286	0.835769	0.969196
FBgn0003892	ptc	11.5129	0.0668779	0.10413	0.520709	0.885893
FBgn0003896	tup	9.25481	-0.0665148	0.0802347	0.407103	0.824502
FBgn0003900	twi	9.41508	-0.177695	0.0963494	0.0651433	0.415409
FBgn0003930	snRNA:U4:39B	1.44178	0.600029	0.941289	0.523829	0.886917
FBgn0003941	RpL40	14.7134	-0.092155	0.0754327	0.221826	0.693304
FBgn0003942	RpS27A	15.6333	0.0158444	0.0677326	0.815042	0.96599
FBgn0003943	Ubi-p63E	12.1666	0.0669711	0.0921836	0.467534	0.855718
FBgn0003944	Ubx	6.8144	0.0112082	0.258806	0.965457	0.995171
FBgn0003950	unc	6.46402	0.177646	0.176929	0.315355	0.774323
FBgn0003963	ush	10.3425	0.139102	0.132444	0.293593	0.757515
FBgn0003964	usp	10.6321	0.00408789	0.0615044	0.947008	0.991112
FBgn0003965	v	1.19953	-4.49165	2.5736	0.0809359	0.459273
FBgn0003969	vap	11.5659	-0.00445448	0.0703471	0.949511	0.991552
FBgn0003975	vg	12.1445	-0.0753397	0.0659566	0.253345	0.726771
FBgn0003977	vir	10.8347	0.161828	0.115458	0.161032	0.623185
FBgn0003978	vls	9.44194	0.22496	0.0789649	0.0043876	0.0797157
FBgn0003984	vn	10.2943	0.101448	0.0954248	0.287728	0.753157
FBgn0003996	w	3.65164	0.79283	0.728665	0.27657	0.746144
FBgn0003997	hid	10.6406	0.0582834	0.109429	0.594301	0.907615
FBgn0004003	wbl	10.9378	0.263252	0.309398	0.394851	0.817566
FBgn0004034	y	2.10358	1.09257	0.796227	0.170008	0.634098
FBgn0004047	Yp3	2.67805	0.656187	0.871562	0.451518	0.848779
FBgn0004049	yrt	11.4285	0.0402549	0.074975	0.591329	0.906022
FBgn0004050	z	10.8475	0.0751539	0.062995	0.232864	0.706586
FBgn0004055	uzip	10.391	0.0381657	0.0660988	0.563666	0.898741
FBgn0004057	Zw	9.07228	0.0844753	0.0926937	0.362117	0.799189
FBgn0004066	Prosalpha4	12.0058	0.088943	0.0713474	0.212537	0.685895
FBgn0004087	Dhfr	9.28482	0.0279952	0.104377	0.788536	0.961847
FBgn0004101	bs	11.0206	0.111934	0.136371	0.411754	0.825727
FBgn0004102	oc	1.05111	0.927819	1.10605	0.401548	0.821013
FBgn0004103	Pp1-87B	13.4719	0.039408	0.0330785	0.233516	0.707604
FBgn0004106	Cdk1	11.4395	0.0651469	0.0890482	0.464418	0.855329
FBgn0004107	Cdk2	10.2633	0.0643857	0.0694528	0.353905	0.795269
FBgn0004108	Nrt	11.3841	0.27699	0.192522	0.150223	0.60673
FBgn0004110	tin	1.32091	1.09521	0.99974	0.273301	0.744058
FBgn0004117	Tm2	3.9264	-2.24547	0.84784	0.00808605	0.122221
FBgn0004118	nAChRbeta2	3.71091	0.734947	0.436644	0.0923417	0.489142
FBgn0004132	boca	10.4011	0.0849022	0.0783078	0.278272	0.746569
FBgn0004133	blow	11.4758	0.0525008	0.0727572	0.470547	0.8573
FBgn0004167	kst	13.2191	0.0709911	0.139679	0.611282	0.912734
FBgn0004168	5-HT1A	1.70103	-1.30788	1.04963	0.21275	0.686154
FBgn0004169	up	4.57638	-1.96996	0.714407	0.0058251	0.0984927
FBgn0004170	sc	9.33611	0.165601	0.0904667	0.0671724	0.420695
FBgn0004177	mts	13.6213	0.0935842	0.0365776	0.0105121	0.146096
FBgn0004179	Csp	11.7266	0.00147774	0.0574541	0.97948	0.998729
FBgn0004197	Ser	12.4138	0.0563983	0.110526	0.609861	0.912734
FBgn0004198	ct	9.42158	-0.118307	0.193372	0.540663	0.891611
FBgn0004227	nonA	12.5846	0.0593234	0.0876895	0.498713	0.874226
FBgn0004228	mex1	0.27348	-0.0246628	2.21405	0.991112	NA
FBgn0004237	Hrb87F	13.6095	0.130533	0.0637583	0.0406279	0.325072
FBgn0004240	DptA	-0.361794	-3.1629	4.60325	0.492019	NA
FBgn0004242	Syt1	5.06193	-1.13977	0.920595	0.215686	0.689062
FBgn0004359	T48	9.84831	0.0729203	0.0851779	0.391945	0.815935
FBgn0004360	Wnt2	10.0834	0.211534	0.18921	0.263572	0.736399
FBgn0004362	HmgD	14.8353	0.154924	0.0927966	0.0950178	0.494226
FBgn0004363	porin	13.7724	0.207072	0.0835015	0.0131433	0.16599
FBgn0004364	18w	12.0817	0.223357	0.130802	0.0877128	0.479089
FBgn0004367	mei-41	9.54298	-0.114677	0.135358	0.396875	0.818529
FBgn0004368	Ptp4E	10.9	-0.0600023	0.10512	0.568136	0.901577
FBgn0004369	Ptp99A	10.8859	0.0662941	0.111034	0.550467	0.89457
FBgn0004370	Ptp10D	11.6352	-0.0819157	0.115106	0.476678	0.86175
FBgn0004373	fwd	11.6942	0.101049	0.107339	0.346503	0.792312
FBgn0004374	neb	9.73641	0.128342	0.118788	0.279951	0.747874
FBgn0004378	Klp61F	11.555	0.0161506	0.0861282	0.851254	0.972524
FBgn0004379	Klp67A	10.6642	0.0952229	0.0743618	0.200357	0.675145
FBgn0004380	Klp64D	8.42342	-0.0227373	0.0860877	0.791689	0.96252
FBgn0004381	Klp68D	7.64669	0.0558505	0.114883	0.626859	0.917173
FBgn0004387	Klp98A	10.605	-0.740048	0.130326	1.35925e-08	1.40764e-06
FBgn0004390	RasGAP1	10.9648	0.127379	0.0947155	0.17867	0.647175
FBgn0004391	shtd	10.7092	-0.023217	0.114797	0.839726	0.969909
FBgn0004394	pdm2	10.0182	0.0795072	0.0880968	0.366792	0.801391
FBgn0004395	unk	11.2423	0.0393979	0.0806068	0.625007	0.917173
FBgn0004396	CrebA	11.2553	0.301205	0.271092	0.266534	0.739359
FBgn0004397	Vinc	11.0592	0.0569233	0.080031	0.476919	0.8618
FBgn0004400	rhi	1.10044	-0.164481	1.26968	0.896926	0.983029
FBgn0004401	Pep	14.2219	0.0669509	0.051533	0.19388	0.667496
FBgn0004403	RpS14a	14.3575	-0.114397	0.0657908	0.082069	0.461591
FBgn0004404	RpS14b	12.8143	-0.0882297	0.107418	0.411436	0.825727
FBgn0004406	tam	8.95243	0.0216056	0.0952671	0.820588	0.967116
FBgn0004419	me31B	12.673	0.0934032	0.0658517	0.156078	0.61528
FBgn0004425	LysB	0.739582	-0.549639	1.77089	0.756276	0.95535
FBgn0004426	LysC	-1.05504	2.01184	4.22012	0.633558	NA
FBgn0004427	LysD	1.79277	1.23752	1.60213	0.439866	0.844191
FBgn0004428	LysE	-0.463307	-1.41143	2.97853	0.635593	NA
FBgn0004429	LysP	-0.798296	-3.95649	5.11861	0.439546	NA
FBgn0004430	LysS	2.09517	0.508445	1.57442	0.74674	0.952397
FBgn0004431	LysX	1.43691	-0.729787	5.20164	0.888423	0.980814
FBgn0004432	Cyp1	14.9265	0.142194	0.0753535	0.0591573	0.395616
FBgn0004435	Galphaq	9.64635	0.0282625	0.0670252	0.673266	0.929272
FBgn0004436	Ubc6	11.5612	0.0295448	0.0505056	0.558561	0.896253
FBgn0004449	Ten-m	12.7281	0.195018	0.132818	0.14202	0.594728
FBgn0004456	mew	11.9613	-0.117812	0.0832268	0.156908	0.616206
FBgn0004463	RpIII128	10.059	-0.0576093	0.0511353	0.259909	0.732775
FBgn0004465	Su(P)	9.28191	0.0896842	0.059053	0.128836	0.571025
FBgn0004507	GlyP	11.9154	-0.153222	0.145458	0.292169	0.757499
FBgn0004509	Fur1	10.7859	0.0280114	0.0932906	0.763979	0.956824
FBgn0004510	Ets97D	9.4937	-0.0323596	0.0806173	0.688127	0.932218
FBgn0004511	dy	6.52381	0.580097	0.470495	0.217594	0.689231
FBgn0004512	Mdr49	9.83354	0.145808	0.122325	0.233272	0.707399
FBgn0004513	Mdr65	3.45685	-0.0136343	0.473505	0.977029	0.998235
FBgn0004552	Akh	3.14896	1.95391	1.22373	NA	NA
FBgn0004554	Edg91	5.91407	-1.41857	0.461005	0.00209012	0.0462507
FBgn0004556	Dbp73D	8.97906	-0.0243619	0.0949682	0.797544	0.962743
FBgn0004567	slp2	0.632611	1.41072	1.44464	0.328807	0.781719
FBgn0004569	aos	8.6867	0.303402	0.0991434	0.00221163	0.04832
FBgn0004573	5-HT7	0.425814	1.37963	1.7789	0.438012	0.842264
FBgn0004574	Rop	11.3105	0.93509	0.100148	9.89912e-21	5.12576e-18
FBgn0004575	Syn	3.27733	-0.0838065	0.502641	0.867581	0.975454
FBgn0004577	Pxd	5.06861	-2.03684	0.549967	0.000212584	0.00753946
FBgn0004581	bgcn	4.0468	0.82094	0.409326	0.0448999	0.341899
FBgn0004583	ex	13.1632	-0.00781557	0.116815	0.946657	0.991112
FBgn0004584	Rrp1	12.2947	0.0375554	0.0679345	0.580388	0.903769
FBgn0004587	B52	13.9571	0.0312231	0.0419013	0.456176	0.8506
FBgn0004588	Eig71Ea	2.55276	3.75556	4.90298	NA	NA
FBgn0004589	Eig71Eb	1.27854	4.68078	5.09796	NA	NA
FBgn0004590	Eig71Ec	1.69448	4.18674	5.04951	NA	NA
FBgn0004591	Eig71Ed	1.09968	3.11309	2.28118	NA	NA
FBgn0004592	Eig71Ee	5.79373	-1.11785	1.76508	NA	NA
FBgn0004593	Eig71Ef	0.715107	5.8209	5.10551	NA	NA
FBgn0004594	Eig71Eg	0.430645	4.72093	5.10697	0.355274	0.795465
FBgn0004595	pros	4.24054	0.111763	0.585914	0.848721	0.972265
FBgn0004597	CycC	9.41811	-0.0348216	0.0687862	0.612696	0.913355
FBgn0004598	Fur2	12.1637	-0.0132437	0.104974	0.899605	0.983717
FBgn0004606	zfh1	9.49191	0.0649025	0.2007	0.746407	0.952397
FBgn0004607	zfh2	13.2907	0.170128	0.118795	0.152111	0.608754
FBgn0004611	Plc21C	10.5288	0.0678081	0.0908942	0.455661	0.850392
FBgn0004618	gl	1.0009	-0.0347567	1.567	0.982304	0.999483
FBgn0004619	GluRIA	-0.67655	-0.5228	2.54801	0.837432	NA
FBgn0004620	GluRIIA	0.742356	-1.35475	1.44214	0.347527	0.792732
FBgn0004622	TkR99D	0.21387	2.48004	1.7446	0.155157	NA
FBgn0004629	Cys	5.61217	-0.565311	0.363645	0.120049	0.555013
FBgn0004635	rho	7.66423	0.27718	0.173994	0.11115	0.536882
FBgn0004636	Rap1	12.245	0.0559227	0.06263	0.371908	0.803877
FBgn0004638	drk	11.8735	0.104407	0.0455735	0.0219663	0.229864
FBgn0004643	Zw10	10.7216	-0.0374921	0.0891133	0.673957	0.929608
FBgn0004644	hh	10.6725	0.0363469	0.0762189	0.633451	0.917173
FBgn0004646	ogre	13.4664	0.171416	0.137723	0.213262	0.686736
FBgn0004647	N	13.692	-0.0101378	0.11885	0.932024	0.989102
FBgn0004648	svr	11.574	0.084719	0.0998368	0.396118	0.818129
FBgn0004650	fs(1)N	1.07009	1.19336	1.19821	0.319271	0.777785
FBgn0004652	fru	11.7387	-0.486557	0.349878	0.164332	0.628676
FBgn0004654	Pgd	10.5926	0.101183	0.0782821	0.19617	0.669541
FBgn0004655	wapl	10.99	0.0438025	0.120254	0.715672	0.939723
FBgn0004656	fs(1)h	13.3746	-0.107191	0.115353	0.352764	0.795013
FBgn0004657	mys	12.2923	0.0557364	0.0711556	0.433449	0.838115
FBgn0004687	Mlc-c	12.2088	0.181721	0.0595198	0.00226472	0.0489634
FBgn0004698	Xpc	11.6599	-0.0189048	0.0767458	0.805427	0.964589
FBgn0004777	Ccp84Ag	1.66865	-3.13291	1.6126	0.0520443	0.371744
FBgn0004780	Ccp84Ad	-0.959642	-2.49469	2.74144	0.362826	NA
FBgn0004782	Ccp84Ab	-0.453605	-0.103149	2.32115	0.964554	NA
FBgn0004783	Ccp84Aa	0.404172	-1.02375	1.3609	0.451896	0.84906
FBgn0004795	retn	-0.264671	-1.43915	2.14278	0.501823	NA
FBgn0004797	mdy	9.78115	-0.124999	0.113965	0.272721	0.743879
FBgn0004811	fs(2)ltoPP43	10.3115	-0.0147002	0.0552908	0.790339	0.962119
FBgn0004828	His3.3B	14.699	-0.0107496	0.0515618	0.834855	0.969196
FBgn0004832	Xpac	9.26566	-0.00686168	0.0847784	0.935492	0.989496
FBgn0004837	Su(H)	9.45513	0.0580222	0.063103	0.357842	0.796308
FBgn0004838	Hrb27C	14.9654	0.0675048	0.0822351	0.411717	0.825727
FBgn0004839	otk	11.249	0.137081	0.0906294	0.130395	0.574638
FBgn0004841	TkR86C	0.941761	-1.03815	0.959916	0.279474	0.747836
FBgn0004852	Ac76E	4.93112	-0.194349	0.309332	0.529817	0.888946
FBgn0004854	B-H2	7.72114	-0.116721	0.140838	0.40724	0.824502
FBgn0004855	RpII15	10.1703	-0.0454087	0.0660032	0.491467	0.870171
FBgn0004856	Bx42	11.0122	0.00947484	0.0502569	0.850463	0.972524
FBgn0004858	elB	10.9951	0.152014	0.0673018	0.0239023	0.24086
FBgn0004859	ci	13.1612	0.0578134	0.0765822	0.450297	0.848419
FBgn0004860	ph-d	10.4913	0.143559	0.084538	0.0894778	0.483117
FBgn0004861	ph-p	11.2935	0.0625252	0.090212	0.488252	0.868772
FBgn0004863	C15	8.14318	0.0331224	0.101188	0.743413	0.951408
FBgn0004864	hop	10.7391	0.0240691	0.10817	0.823916	0.968037
FBgn0004865	Eip78C	10.0447	0.469577	0.453141	0.300075	0.763631
FBgn0004867	RpS2	15.5886	-0.00109301	0.0721927	0.98792	0.999747
FBgn0004868	Gdi	13.0301	0.146999	0.0838759	0.0796738	0.45768
FBgn0004870	bab1	4.99249	-0.586554	0.269259	0.0293762	0.269222
FBgn0004872	piwi	4.42214	0.639409	0.442384	0.148354	0.603907
FBgn0004875	enc	11.4271	0.142501	0.128169	0.266217	0.73932
FBgn0004876	cdi	10.9217	0.111757	0.106962	0.296101	0.76048
FBgn0004878	cas	2.65536	-0.4885	0.648089	0.450996	0.848722
FBgn0004880	scrt	6.57881	-1.75306	0.307037	1.1325e-08	1.18467e-06
FBgn0004882	orb	3.27022	-0.815379	0.590959	0.167662	0.632995
FBgn0004885	tok	12.7001	-0.0229384	0.0963579	0.811839	0.96599
FBgn0004888	Scsalpha1	11.8639	0.0960878	0.0752414	0.201581	0.675274
FBgn0004889	tws	12.5162	0.0226642	0.0689485	0.742373	0.950811
FBgn0004892	sob	9.85609	0.0117859	0.080449	0.883526	0.97953
FBgn0004893	bowl	13.2837	0.0953584	0.0669519	0.154365	0.612931
FBgn0004897	fd96Ca	0.167706	3.01446	2.67168	0.259193	NA
FBgn0004898	fd96Cb	2.27945	0.74524	1.55011	0.630682	0.917173
FBgn0004901	Prat	10.5398	0.0860174	0.0447259	0.0544535	0.37847
FBgn0004903	Rb97D	10.7888	-0.020749	0.0617741	0.736958	0.948184
FBgn0004907	14-3-3zeta	14.3941	0.104444	0.0550006	0.0575696	0.391715
FBgn0004908	Arl2	8.64183	0.227897	0.0911605	0.012421	0.160991
FBgn0004910	Eip63F-1	4.97676	-1.42122	0.270271	1.45242e-07	1.23289e-05
FBgn0004913	Gnf1	10.9966	0.0311398	0.0751061	0.678426	0.93106
FBgn0004914	Hnf4	9.86516	0.164849	0.115935	0.155053	0.612931
FBgn0004915	TfIIB	10.446	-0.000229513	0.0606849	0.996982	1
FBgn0004919	gol	2.86346	-0.0550171	0.670475	0.934602	0.989418
FBgn0004921	Ggamma1	12.3039	0.0408422	0.0722483	0.571868	0.902372
FBgn0004924	Top1	12.2362	0.0717673	0.103245	0.486982	0.867719
FBgn0004926	eIF2beta	12.614	0.0405408	0.0906976	0.654883	0.924374
FBgn0004956	upd1	7.74658	0.268623	0.124974	0.0316005	0.283093
FBgn0004957	por	9.83057	-0.129416	0.0744024	0.0819636	0.461563
FBgn0004959	phm	6.11065	-0.301318	0.939543	NA	NA
FBgn0005198	gig	10.6054	-0.0175849	0.0787418	0.823284	0.96792
FBgn0005278	Sam-S	12.9215	-0.0524959	0.0718837	0.465213	0.855423
FBgn0005322	nmd	9.83659	-0.0673946	0.0528417	0.202166	0.676218
FBgn0005355	Su(fu)	10.1733	0.128525	0.0635682	0.0431931	0.334927
FBgn0005386	ash1	10.37	0.090108	0.0953459	0.344626	0.790385
FBgn0005391	Yp2	1.94124	-0.289108	0.734229	0.69376	0.934519
FBgn0005411	U2af50	11.6847	0.0327325	0.0426269	0.442556	0.845482
FBgn0005427	ewg	11.0925	0.0460521	0.0897648	0.60793	0.912593
FBgn0005533	RpS17	14.9872	-0.0461388	0.0625214	0.460533	0.853534
FBgn0005536	Mbs	11.3526	-0.00425131	0.10208	0.96678	0.995622
FBgn0005558	ey	3.50747	-0.229005	0.569278	0.687484	0.932218
FBgn0005561	sv	3.31404	0.204641	0.566307	0.717829	0.940383
FBgn0005564	Shal	4.0552	-0.153691	0.385188	0.689891	0.932704
FBgn0005585	Calr	14.5798	0.12203	0.0968145	0.207506	0.681983
FBgn0005586	Rab3	3.10674	0.587206	0.697295	0.399721	0.819867
FBgn0005593	RpL7	15.6499	-0.0173241	0.0672707	0.796771	0.962594
FBgn0005596	yem	10.216	0.103795	0.0892617	0.244904	0.719624
FBgn0005612	Sox14	9.75209	0.354063	0.123779	0.00423058	0.0776806
FBgn0005613	Sox15	11.4631	0.0564449	0.0753066	0.453535	0.849486
FBgn0005614	trpl	-1.02548	0.706173	2.23242	0.751755	NA
FBgn0005616	msl-2	9.45483	0.173039	0.135541	0.201723	0.675274
FBgn0005617	msl-1	10.514	0.035819	0.0848938	0.673078	0.929272
FBgn0005619	Hdc	2.97679	0.642438	1.57286	0.682942	0.931331
FBgn0005624	Psc	10.7037	0.064588	0.0988935	0.513687	0.883321
FBgn0005626	ple	5.38356	-0.147383	1.19991	0.902243	0.983717
FBgn0005631	robo1	11.1142	0.00968469	0.102359	0.924621	0.987859
FBgn0005632	faf	12.5563	0.0779114	0.103018	0.449474	0.848324
FBgn0005633	fln	-0.574273	2.31457	2.60796	0.374809	NA
FBgn0005636	nvy	8.62235	0.0288672	0.0884238	0.744073	0.951899
FBgn0005638	slbo	0.999795	0.571694	1.63761	0.727012	0.944592
FBgn0005640	Eip63E	10.9642	0.115375	0.0770149	0.13411	0.579893
FBgn0005642	wdn	10.4409	-0.0932285	0.0775404	0.229239	0.702158
FBgn0005648	Pabp2	12.7709	0.0375516	0.0745109	0.614279	0.91363
FBgn0005649	Rox8	12.6824	0.0913338	0.0635626	0.150744	0.60696
FBgn0005655	PCNA	12.0274	-0.056092	0.103635	0.588337	0.905726
FBgn0005658	Ets65A	0.129707	-0.502706	1.44312	0.72758	NA
FBgn0005659	Ets98B	7.71872	-0.0892521	0.143664	0.53443	0.890387
FBgn0005660	Ets21C	5.90076	0.0108145	0.288398	0.970087	0.996851
FBgn0005664	Crys	5.56474	-8.40367	1.21462	4.55666e-12	8.27874e-10
FBgn0005666	bt	4.52944	-1.47896	0.573263	0.00988296	0.140011
FBgn0005670	Cyp4d1	5.14226	-3.2653	1.49102	0.0285253	0.265654
FBgn0005671	Vha55	11.8115	-0.0210358	0.0396372	0.59562	0.908163
FBgn0005672	spi	12.1121	0.222298	0.064946	0.000619755	0.0184431
FBgn0005674	GluProRS	12.567	0.0519702	0.0776722	0.503434	0.877409
FBgn0005677	dac	9.23571	0.0605422	0.139124	0.663442	0.927196
FBgn0005683	pie	8.12314	0.153171	0.132726	0.248485	0.722638
FBgn0005694	Aef1	10.1663	0.235875	0.0844436	0.00521759	0.0912725
FBgn0005695	gcl	8.60676	-0.108177	0.1078	0.31562	0.774323
FBgn0005696	DNApol-alpha73	8.82194	-0.0711419	0.129025	0.581372	0.903769
FBgn0005771	noc	11.5805	0.00181523	0.0604323	0.976037	0.997954
FBgn0005775	Con	5.79538	0.844346	0.492917	0.0867204	0.475676
FBgn0005777	PpD3	10.5646	0.0781472	0.0763268	0.305906	0.768177
FBgn0008635	betaCOP	12.4128	0.00376419	0.108967	0.972443	0.997275
FBgn0008646	E5	10.0415	0.237333	0.0944584	0.0119857	0.157718
FBgn0008651	lbl	1.86542	-1.30206	1.08102	0.228409	0.701549
FBgn0010014	CanB	-0.787327	1.43651	2.03828	0.480955	NA
FBgn0010015	CanA1	-1.19504	-3.04196	4.12003	0.46031	NA
FBgn0010019	Cyp4g1	1.32827	-2.12599	1.11316	0.0561508	0.386634
FBgn0010038	GstD2	2.05626	0.348906	0.781905	0.655434	0.924374
FBgn0010039	GstD3	9.17041	-0.278441	0.141214	0.0486361	0.360799
FBgn0010040	GstD4	1.29878	-0.395784	1.30543	0.76175	0.95632
FBgn0010041	GstD5	0.600131	-0.24139	1.18248	0.838246	0.969909
FBgn0010042	GstD6	-1.28519	-1.3904	5.16492	0.787775	NA
FBgn0010051	Itpr	11.4796	-0.148295	0.151925	0.329011	0.781789
FBgn0010053	Jheh1	7.61467	-0.335068	0.225369	0.137081	0.586943
FBgn0010078	RpL23	15.3843	0.0349867	0.0855962	0.68273	0.931331
FBgn0010097	gammaTub37C	0.968735	-3.89892	1.37858	0.00468079	0.0832891
FBgn0010100	mAcon1	12.5532	0.0500428	0.0487669	0.304814	0.767119
FBgn0010105	comm	8.22224	0.166273	0.113085	0.14147	0.594728
FBgn0010109	dpn	8.76745	-0.18677	0.151657	0.218126	0.689535
FBgn0010113	hdc	13.7681	-0.215179	0.181776	0.236507	0.711583
FBgn0010114	hig	1.3835	-1.48254	0.995262	0.13633	0.585469
FBgn0010173	RpA-70	11.659	-0.2485	0.0767759	0.00120922	0.0309202
FBgn0010194	Wnt5	11.2007	-0.00117626	0.0856265	0.98904	0.999747
FBgn0010197	Gyc32E	0.898367	-0.0862335	1.12205	0.93874	0.989696
FBgn0010198	RpS15Aa	14.9266	-0.0708352	0.0761875	0.352502	0.795013
FBgn0010213	Sod2	10.8429	-0.0445503	0.0778637	0.567215	0.901208
FBgn0010215	alpha-Cat	12.3022	0.0321464	0.0691382	0.641961	0.920728
FBgn0010217	ATPsynbeta	14.3179	-0.0268237	0.0775089	0.729288	0.944642
FBgn0010220	Dbp45A	9.24626	-0.107711	0.0966351	0.265016	0.737688
FBgn0010222	Nmdmc	9.6467	-0.1105	0.112635	0.326571	0.780735
FBgn0010223	Galphaf	2.04414	0.226654	0.748481	0.762028	0.95632
FBgn0010225	Gel	10.7691	-0.0678738	0.121158	0.575335	0.903182
FBgn0010226	GstS1	13.3783	0.164982	0.0393341	2.73625e-05	0.00132635
FBgn0010228	HmgZ	13.0112	0.0911501	0.0805571	0.257846	0.730577
FBgn0010235	Klc	11.1056	0.0695032	0.0726593	0.338788	0.786994
FBgn0010238	Lac	12.8839	0.168712	0.070861	0.0172713	0.197856
FBgn0010240	Lcch3	4.4946	-0.494937	0.382573	0.195767	0.669541
FBgn0010241	Mdr50	1.38948	-0.361951	1.55693	0.816167	0.96599
FBgn0010246	Myo61F	10.5332	-0.0049452	0.101102	0.960989	0.994504
FBgn0010247	Parp	11.1839	0.0668558	0.10006	0.504031	0.87784
FBgn0010258	Rbp4	4.54813	0.18436	0.319991	0.56452	0.899337
FBgn0010263	Rbp9	3.97243	-0.06181	0.466163	0.894515	0.982764
FBgn0010265	RpS13	15.5104	0.00120107	0.0732929	0.986925	0.999747
FBgn0010269	Dsor1	10.0724	0.0674605	0.0585152	0.248963	0.722994
FBgn0010278	Ssrp	12.3413	0.00463195	0.0748005	0.950623	0.992305
FBgn0010280	Taf4	12.1562	-0.0186615	0.0904595	0.836559	0.969196
FBgn0010282	TfIIFalpha	10.9806	0.0164816	0.0612825	0.787972	0.961725
FBgn0010287	Trf	8.59308	-0.179521	0.0986162	0.0686987	0.423478
FBgn0010288	Uch	11.2726	0.006197	0.0874227	0.943489	0.989946
FBgn0010292	bys	10.3627	-0.0626744	0.0732298	0.392076	0.815935
FBgn0010300	brat	12.9118	0.111142	0.107073	0.299271	0.762987
FBgn0010303	hep	10.8738	-0.0189389	0.103844	0.855286	0.97387
FBgn0010309	pigeon	8.94175	0.114018	0.0982454	0.245826	0.720311
FBgn0010313	corto	11.536	0.12596	0.0667531	0.0591667	0.395616
FBgn0010314	Cks30A	10.9219	0.0989115	0.134382	0.461701	0.854716
FBgn0010315	CycD	10.5544	-0.00226715	0.0604908	0.970103	0.996851
FBgn0010316	dap	11.0188	-0.0416634	0.139196	0.7647	0.956961
FBgn0010323	Gsc	-0.8637	1.37496	2.43485	0.572278	NA
FBgn0010328	woc	13.1479	0.0635863	0.117895	0.589646	0.905903
FBgn0010329	Tbh	-0.318264	-1.98081	2.21125	0.370365	NA
FBgn0010333	Rac1	11.5895	0.0531353	0.0550608	0.334531	0.784451
FBgn0010339	128up	10.9062	-0.0105602	0.0818354	0.897325	0.983288
FBgn0010340	140up	8.13551	0.0365634	0.117979	0.756626	0.95535
FBgn0010341	Cdc42	12.5191	0.0708533	0.052011	0.173111	0.639579
FBgn0010342	Map60	12.1064	0.0156293	0.0435687	0.719798	0.941335
FBgn0010348	Arf79F	13.8815	0.104606	0.0657954	0.111864	0.537846
FBgn0010350	Cds	9.56717	0.00952064	0.0903669	0.916094	0.986554
FBgn0010352	Nc73EF	11.4398	0.0437072	0.0664038	0.510408	0.881442
FBgn0010355	Taf1	11.7293	0.105282	0.105016	0.316086	0.774323
FBgn0010356	Taf5	9.88256	-0.0943376	0.0616282	0.12583	0.566072
FBgn0010357	betaTry	2.74129	4.11181	3.3924	NA	NA
FBgn0010379	Akt1	11.7165	0.151784	0.0689124	0.0276256	0.260319
FBgn0010380	AP-1-2beta	11.7222	0.064616	0.0887876	0.466761	0.855718
FBgn0010382	CycE	10.6493	0.0641555	0.092997	0.490278	0.869657
FBgn0010383	Cyp18a1	4.98563	0.100019	0.660523	0.879641	0.978595
FBgn0010385	Def	3.79334	0.0843891	0.492366	0.863913	0.974819
FBgn0010387	Acbp2	1.96765	-2.28005	1.59155	0.151972	0.608754
FBgn0010388	Dro	0.926131	0.487499	1.13938	0.66875	0.928763
FBgn0010389	htl	9.2657	0.139897	0.0888876	0.115517	0.543772
FBgn0010391	SrpRalpha	11.7019	0.0517018	0.0886124	0.559584	0.89671
FBgn0010395	Itgbn	3.00588	-0.552686	0.713219	0.438389	0.842493
FBgn0010397	LamC	10.0492	-0.243515	0.193781	0.208881	0.683301
FBgn0010398	Lrr47	8.03969	0.105105	0.0879041	0.231823	0.705898
FBgn0010399	Nmdar1	0.489873	0.565597	1.6534	0.73229	0.945821
FBgn0010401	Os-C	5.72291	-0.311401	0.247818	0.208909	0.683301
FBgn0010406	RNaseX25	9.64281	0.0446611	0.0736956	0.544501	0.892364
FBgn0010407	Ror	3.91956	-0.946032	0.376412	0.0119612	0.157596
FBgn0010408	RpS9	15.2194	-0.150838	0.0887862	0.08934	0.482884
FBgn0010409	RpL18A	15.2094	0.0448083	0.0748985	0.549671	0.89457
FBgn0010411	RpS18	14.9133	-0.00223269	0.0795254	0.977602	0.998254
FBgn0010412	RpS19a	15.2396	-0.079314	0.0802001	0.322687	0.779666
FBgn0010414	SerT	6.55573	0.19828	0.167883	0.23758	0.712988
FBgn0010415	Sdc	12.807	0.0826356	0.071756	0.249477	0.723288
FBgn0010416	TH1	10.8253	0.0253368	0.0484614	0.601096	0.909831
FBgn0010417	Taf6	10.2984	0.00925435	0.0815217	0.909618	0.985364
FBgn0010421	TfIIFbeta	9.76323	-0.0435127	0.0643625	0.499005	0.874226
FBgn0010422	TfIIS	11.2539	0.00688015	0.0590801	0.907292	0.98481
FBgn0010423	TpnC47D	0.78772	-4.5639	1.84849	0.0135497	0.169674
FBgn0010424	TpnC73F	4.7149	-1.6463	0.538369	0.00222867	0.0484875
FBgn0010425	epsilonTry	0.655404	-0.00844949	2.61814	0.997425	1
FBgn0010431	mtrm	1.75231	0.981086	0.819721	0.231363	0.705121
FBgn0010433	ato	4.17367	0.436363	0.438033	0.319159	0.777785
FBgn0010434	cora	13.2863	0.14661	0.0954734	0.124635	0.562894
FBgn0010435	emp	11.8732	0.338919	0.0614661	3.50953e-08	3.34969e-06
FBgn0010438	mtSSB	9.64891	-0.129457	0.0942556	0.169605	0.634098
FBgn0010441	pll	9.60801	0.01389	0.0608654	0.819484	0.966471
FBgn0010452	trn	11.7359	0.0243106	0.0658372	0.711939	0.937706
FBgn0010453	Wnt4	8.00603	0.485615	0.261886	0.0636963	0.41104
FBgn0010470	Fkbp14	11.8504	0.526348	0.333075	0.114045	0.541471
FBgn0010473	tutl	11.585	0.0306914	0.106727	0.773677	0.958489
FBgn0010482	l(2)01289	4.08688	-0.713526	0.631945	0.258858	0.73184
FBgn0010488	NAT1	13.6474	0.150616	0.122073	0.217271	0.689231
FBgn0010497	dmGlut	8.48326	0.301815	0.10717	0.00485925	0.0857281
FBgn0010501	Dcp-1	10.6955	-0.025935	0.0630486	0.680816	0.931331
FBgn0010504	kermit	9.00333	0.0463366	0.104686	0.658038	0.925022
FBgn0010516	wal	10.8009	0.107466	0.0781689	0.169196	0.634098
FBgn0010520	Bka	8.61121	0.135404	0.0953278	0.15549	0.613665
FBgn0010531	Ccs	8.38829	0.0239123	0.112435	0.83158	0.968983
FBgn0010548	Aldh-III	11.3987	-0.135384	0.113024	0.230984	0.70417
FBgn0010549	l(2)03659	7.75638	0.905301	0.212933	2.12275e-05	0.0010685
FBgn0010551	Phb2	12.488	-0.105293	0.0463931	0.0232329	0.237278
FBgn0010583	dock	10.3945	0.106443	0.0748206	0.154839	0.612931
FBgn0010590	Prosbeta1	11.7272	-0.05782	0.0770391	0.452937	0.84906
FBgn0010591	Sply	10.0409	0.126215	0.0588452	0.0319631	0.284129
FBgn0010602	lwr	12.8568	0.0319919	0.0626541	0.609623	0.912612
FBgn0010607	l(2)05714	9.31802	0.030428	0.0858742	0.72309	0.943389
FBgn0010611	Hmgs	10.0812	-0.0969167	0.0510762	0.0577629	0.392343
FBgn0010612	ATPsynG	11.549	-0.0309597	0.140751	0.825902	0.968525
FBgn0010620	CG10939	12.7731	0.00622193	0.123639	0.959865	0.994323
FBgn0010621	CCT5	13.2744	-0.00843909	0.058173	0.884656	0.979602
FBgn0010622	DCTN3-p24	9.53919	0.0303146	0.0874055	0.728722	0.944592
FBgn0010638	Sec61beta	12.48	0.00408113	0.130217	0.974998	0.99749
FBgn0010651	MFS14	9.83942	-0.0172135	0.125983	0.89132	0.982423
FBgn0010660	Nup214	11.904	0.116811	0.0940644	0.214301	0.688157
FBgn0010741	Pfdn2	11.3463	0.0647844	0.0765353	0.397293	0.818529
FBgn0010747	Srp54k	11.4325	0.0746336	0.0928865	0.42169	0.832607
FBgn0010750	atms	10.7661	0.0484805	0.0506344	0.338335	0.786787
FBgn0010762	simj	11.663	0.169088	0.0907567	0.0624489	0.40681
FBgn0010768	sqz	9.86217	0.181205	0.0940375	0.053986	0.376738
FBgn0010770	ppan	9.60427	-0.131834	0.0703486	0.0609291	0.401132
FBgn0010772	Xe7	11.9038	0.0859629	0.0460627	0.0620113	0.405935
FBgn0010774	Ref1	12.7663	0.053231	0.0486578	0.27396	0.744654
FBgn0010786	l(3)02640	9.62161	-0.203118	0.0666267	0.00229909	0.0494997
FBgn0010803	TrpRS	9.97797	0.00289829	0.0715825	0.967703	0.996177
FBgn0010808	Chchd3	10.245	0.0491207	0.0637608	0.441068	0.844897
FBgn0010812	unc-45	10.1951	-0.144987	0.0929245	0.118696	0.551713
FBgn0010825	Gug	12.3135	0.0769806	0.134726	0.567738	0.901286
FBgn0010830	l(3)04053	9.80434	-0.0202255	0.0535818	0.705825	0.937706
FBgn0010877	l(3)05822	10.4277	0.108448	0.0718618	0.131269	0.576137
FBgn0010894	sinu	11.7104	0.0451656	0.0548619	0.41036	0.825727
FBgn0010905	Spn	9.68877	0.252229	0.235128	0.283391	0.750502
FBgn0010909	msn	12.9138	0.160867	0.105706	0.128049	0.570111
FBgn0010926	l(3)07882	10.251	-0.14235	0.0693858	0.0402111	0.322811
FBgn0011016	SsRbeta	12.081	0.154739	0.146715	0.291566	0.756858
FBgn0011020	Sas-4	9.73874	0.152056	0.0898459	0.0905679	0.485357
FBgn0011202	dia	10.5718	0.0665793	0.0867599	0.442846	0.845482
FBgn0011204	cue	9.86724	0.030728	0.0701069	0.661167	0.926042
FBgn0011205	fbl	10.1354	-0.035094	0.0509159	0.490663	0.869657
FBgn0011206	bol	5.63731	-0.109926	0.317157	0.728895	0.944592
FBgn0011207	pelo	10.2214	-0.00935571	0.0498741	0.851201	0.972524
FBgn0011211	blw	14.2099	0.0198675	0.0606559	0.743256	0.951408
FBgn0011217	eff	13.6006	0.0913595	0.0892109	0.305795	0.768177
FBgn0011224	heph	14.4575	-0.0865637	0.0880832	0.325731	0.779816
FBgn0011225	jar	12.8605	0.105732	0.18377	0.565055	0.899571
FBgn0011227	ox	9.13719	0.0177955	0.132627	0.893262	0.982647
FBgn0011230	poe	12.9302	-0.00485736	0.135635	0.971432	0.997141
FBgn0011232	scat	9.38484	0.0133378	0.0713333	0.851677	0.97278
FBgn0011236	ken	9.95607	-0.341216	0.317003	0.281758	0.748365
FBgn0011259	Sema1a	10.2693	-0.0961626	0.157007	0.540224	0.891611
FBgn0011260	Sema2a	13.6016	0.077417	0.0573847	0.177309	0.64451
FBgn0011272	RpL13	15.2653	-0.0662634	0.0849306	0.43527	0.840026
FBgn0011274	Dif	6.84973	-0.568064	0.219735	0.00973165	0.138797
FBgn0011279	Obp69a	2.52888	0.303488	0.66191	0.646591	0.921533
FBgn0011280	Obp19d	-0.77839	-1.23405	2.5695	0.631035	NA
FBgn0011282	Obp84a	2.97647	-1.24791	0.670283	0.0626366	0.406867
FBgn0011284	RpS4	15.7078	0.0797262	0.0762363	0.295664	0.760334
FBgn0011286	RyR	4.7895	0.869592	0.502387	0.0834661	0.46597
FBgn0011288	Snap25	6.10753	0.812656	0.316968	0.0103521	0.14447
FBgn0011289	TfIIA-L	10.8153	0.00637699	0.0505247	0.899562	0.983717
FBgn0011290	Taf12	10.0963	0.0333002	0.0567961	0.557666	0.896199
FBgn0011291	Taf11	9.08177	-0.00455429	0.114656	0.968315	0.996269
FBgn0011296	l(2)efl	3.94621	-2.18087	0.73196	0.00288732	0.0585148
FBgn0011297	Alg3	9.21913	-0.654629	0.11816	3.02134e-08	2.9799e-06
FBgn0011300	babo	11.711	0.0058581	0.0784494	0.940474	0.989696
FBgn0011305	Rsf1	12.0665	0.0959005	0.0546167	0.0791082	0.456188
FBgn0011327	Uch-L5	11.509	0.0871403	0.0553393	0.115336	0.543703
FBgn0011335	vers	9.19603	-0.0885924	0.0824694	0.282713	0.749558
FBgn0011336	Stt3B	12.2808	0.290949	0.233349	0.212456	0.685895
FBgn0011361	ND-ACP	10.8085	0.0439465	0.0705279	0.533214	0.890115
FBgn0011455	ND-SGDH	10.1664	-0.0830872	0.0868985	0.339001	0.786994
FBgn0011474	PR-Set7	10.9201	0.0931205	0.0900248	0.300956	0.764087
FBgn0011476	l(3)neo43	7.22004	-0.599083	0.166616	0.000323647	0.0107083
FBgn0011481	Ssdp	12.1985	-0.000950106	0.0824431	0.990805	0.999747
FBgn0011509	SrpRbeta	10.2181	0.154802	0.109915	0.159019	0.619934
FBgn0011566	Smyd3	8.68759	-0.0741847	0.0785384	0.344881	0.790524
FBgn0011569	can	-0.955764	0.581839	3.01905	0.847176	NA
FBgn0011570	cpb	11.7242	0.0887103	0.0723753	0.220312	0.69184
FBgn0011573	Cdc37	11.3295	0.0694103	0.0809157	0.390998	0.815935
FBgn0011576	Cyp4d2	7.32689	-0.336066	0.254758	0.187115	0.660117
FBgn0011584	Trp1	11.2367	0.0811654	0.0563462	0.149732	0.606188
FBgn0011586	e(r)	10.7196	0.0529236	0.0448736	0.238242	0.713899
FBgn0011589	Elk	3.89368	1.00214	0.572568	0.0800742	0.458511
FBgn0011591	fng	12.0903	-0.00835051	0.046784	0.858338	0.974078
FBgn0011592	fra	11.9592	0.297168	0.199669	0.13667	0.586068
FBgn0011596	fzo	0.0520325	-0.723987	1.96057	0.711924	NA
FBgn0011603	ine	3.47536	0.720639	0.484656	0.137039	0.586943
FBgn0011604	Iswi	12.386	-0.0335929	0.0536332	0.531088	0.889262
FBgn0011606	Klp3A	11.564	0.0630746	0.0511238	0.217292	0.689231
FBgn0011638	La	12.378	0.0528046	0.0725068	0.466448	0.855718
FBgn0011640	lark	12.5869	0.00892486	0.0742466	0.90432	0.983896
FBgn0011642	Zyx	11.615	-0.0582961	0.0569372	0.305898	0.768177
FBgn0011648	Mad	11.2425	-0.0656554	0.0510291	0.198224	0.671685
FBgn0011653	mas	11.2317	0.0821033	0.103147	0.42604	0.835543
FBgn0011655	Med	10.8602	0.0326131	0.0761319	0.668377	0.92859
FBgn0011656	Mef2	10.6502	-0.0476357	0.0837602	0.569549	0.902149
FBgn0011659	Mlh1	8.71616	-0.257288	0.16039	0.108683	0.530654
FBgn0011660	Pms2	9.66904	-0.0608091	0.0803208	0.449003	0.847899
FBgn0011661	Moe	14.2217	0.0158615	0.0595231	0.789873	0.961944
FBgn0011666	msi	11.6123	0.00368087	0.0845215	0.965264	0.995171
FBgn0011672	Mvl	10.4285	0.282307	0.142084	0.0469333	0.352204
FBgn0011674	insc	7.01997	-0.200611	0.164105	0.221535	0.692906
FBgn0011676	Nos	3.2705	-0.198816	0.83962	0.812818	0.96599
FBgn0011692	pav	11.8475	0.0797943	0.0851436	0.348669	0.79281
FBgn0011693	Pdh	1.77667	-0.223657	0.749748	0.765467	0.957042
FBgn0011695	EbpIII	5.26086	-0.432203	0.492632	0.380305	0.809676
FBgn0011701	repo	1.56963	1.20667	0.942514	0.200452	0.675145
FBgn0011703	RnrL	11.9312	-0.0424967	0.096901	0.660982	0.926042
FBgn0011704	RnrS	11.6955	-0.0180514	0.102915	0.860765	0.974819
FBgn0011705	rost	8.81237	0.0488529	0.0689033	0.478321	0.862955
FBgn0011706	rpr	7.85953	0.0804609	0.149732	0.591016	0.905926
FBgn0011708	Syx5	10.0093	0.0392666	0.0538188	0.46563	0.8556
FBgn0011710	2024-09-01	12.1376	0.0329829	0.0555236	0.552489	0.89457
FBgn0011715	Snr1	11.0293	0.0231101	0.0758107	0.760488	0.956243
FBgn0011722	Tig	8.9795	-0.461754	0.371736	0.214179	0.687976
FBgn0011725	twin	11.3679	-0.0814229	0.0597408	0.172903	0.639579
FBgn0011726	tsr	14.1916	0.0837838	0.0805823	0.298466	0.762264
FBgn0011737	Wee1	9.91347	-0.0675457	0.070544	0.338317	0.786787
FBgn0011739	wts	10.7389	0.0529502	0.102961	0.60706	0.912593
FBgn0011740	alpha-Man-IIa	11.2907	0.0538194	0.0669742	0.421638	0.832607
FBgn0011741	Arp6	10.5975	0.0771632	0.0578953	0.182595	0.652504
FBgn0011742	Arp2	11.8422	0.141021	0.0600307	0.0188161	0.209302
FBgn0011745	Arp1	11.339	0.106021	0.0587292	0.0710348	0.431358
FBgn0011746	ana	10.8735	-0.232297	0.107694	0.0310054	0.280185
FBgn0011747	Ank	12.979	0.0267434	0.050831	0.598802	0.908931
FBgn0011754	PhKgamma	10.8526	0.0300401	0.0592072	0.611893	0.912734
FBgn0011758	B-H1	7.64111	-0.0860699	0.140337	0.539671	0.891611
FBgn0011760	ctp	13.3888	-0.156683	0.0546431	0.00413869	0.0762639
FBgn0011762	DNApol-alpha50	8.16364	-0.010787	0.126306	0.93194	0.989102
FBgn0011763	Dp	12.2558	-0.0111357	0.0623022	0.858145	0.974078
FBgn0011766	E2f1	12.3237	-0.0789852	0.0919036	0.3901	0.815935
FBgn0011768	Fdh	12.0312	0.169262	0.0632683	0.00746612	0.116445
FBgn0011769	Fdx1	7.44681	-0.13412	0.128752	0.297553	0.761629
FBgn0011770	Gip	9.65629	0.295492	0.13145	0.02458	0.242891
FBgn0011771	Hem	10.8961	0.0430749	0.0693577	0.534564	0.890387
FBgn0011774	Irbp	8.61297	-0.0503189	0.120053	0.675116	0.929968
FBgn0011785	BRWD3	11.9534	0.0436893	0.109748	0.690567	0.932887
FBgn0011787	mRpL12	10.1556	-0.0950152	0.0904669	0.293591	0.757515
FBgn0011802	Gem3	9.32733	0.116041	0.0819143	0.156595	0.615445
FBgn0011817	nmo	11.7825	0.137555	0.154176	0.372289	0.803877
FBgn0011818	oaf	9.8369	-0.00454875	0.0745481	0.951345	0.992375
FBgn0011824	CG4038	11.4317	-0.0236299	0.0906438	0.794332	0.96252
FBgn0011826	Pp2B-14D	10.9794	0.0258499	0.0726653	0.722036	0.942776
FBgn0011828	Pxn	11.0792	0.280172	0.294252	0.341021	0.788659
FBgn0011829	Ret	5.80761	0.506088	0.276637	0.0673348	0.421341
FBgn0011836	Taf2	10.6652	-0.00122947	0.0731496	0.98659	0.999747
FBgn0011837	Tis11	11.4452	-0.0487466	0.186748	0.79407	0.96252
FBgn0011916	tRNA:Met-CAT-1-2	0.162853	-1.45511	1.79731	0.418169	NA
FBgn0011987	tRNA:SeC-TCA-1-1	-1.16966	-1.5281	3.57312	0.668895	NA
FBgn0012034	AcCoAS	6.79112	-0.538242	0.337244	0.110489	0.535185
FBgn0012036	Aldh	10.3079	-1.54688	0.309176	5.63803e-07	4.39003e-05
FBgn0012037	Ance	13.4383	-0.108304	0.0789151	0.169934	0.634098
FBgn0012042	AttA	0.112478	2.30204	1.84657	0.212522	NA
FBgn0012051	CalpA	10.2967	-0.0538595	0.0714908	0.451223	0.848779
FBgn0012058	Cdc27	10.5078	0.149801	0.0641679	0.0195688	0.215132
FBgn0013263	Trl	8.49545	0.107198	0.0953612	0.260959	0.734573
FBgn0013269	Fkbp39	13.0323	-0.0305599	0.101828	0.764092	0.956824
FBgn0013272	Gp150	14.455	0.0690139	0.0434078	0.111858	0.537846
FBgn0013275	Hsp70Aa	5.55094	0.0719556	0.734064	0.921914	0.987417
FBgn0013276	Hsp70Ab	7.1959	0.115792	0.762899	0.879362	0.978595
FBgn0013277	Hsp70Ba	6.2009	-4.22157	1.33815	0.00160612	0.0390445
FBgn0013278	Hsp70Bb	8.5902	-0.170705	0.986905	0.862675	0.974819
FBgn0013279	Hsp70Bc	8.66504	0.514646	1.00007	0.606824	0.912593
FBgn0013303	Nca	10.1601	-0.0549311	0.0767561	0.474202	0.85959
FBgn0013305	Nmda1	10.5968	-0.0314146	0.0526322	0.550594	0.89457
FBgn0013307	Odc1	2.75583	-1.61641	1.51481	0.285941	0.752606
FBgn0013308	Odc2	-0.151274	-0.814344	3.22498	0.800646	NA
FBgn0013323	Ptth	-0.317246	-2.46787	2.09753	0.23937	NA
FBgn0013325	RpL11	15.1188	0.000346656	0.0694322	0.996016	1
FBgn0013334	Sap47	10.5451	-0.0773008	0.0873456	0.376157	0.807521
FBgn0013342	nSyb	1.54459	0.167652	1.02838	0.870498	0.976481
FBgn0013343	Syx1A	9.81153	-0.0731087	0.210525	0.728389	0.944592
FBgn0013347	TfIIA-S	10.8518	-0.072474	0.0625785	0.246812	0.720839
FBgn0013432	bcn92	8.86432	0.0843598	0.090327	0.350336	0.794372
FBgn0013435	Cdc2rk	9.02955	-0.100266	0.0682439	0.141769	0.594728
FBgn0013467	igl	0.066156	-1.33528	1.99788	0.503912	NA
FBgn0013469	klu	10.477	0.0399712	0.108135	0.71165	0.937706
FBgn0013531	MED20	8.31067	0.0603695	0.112297	0.590861	0.905926
FBgn0013548	l(2)dtl	9.51031	0.0277632	0.0959192	0.772242	0.958489
FBgn0013563	Pex1	8.26075	-0.0365607	0.106472	0.731311	0.945382
FBgn0013576	mtd	11.9057	-0.0385047	0.066424	0.56213	0.897673
FBgn0013672	NA	14.1781	-0.0147194	0.119646	0.902087	0.983717
FBgn0013673	NA	1.17602	-0.67483	0.987094	0.494194	0.872027
FBgn0013674	NA	16.6086	0.000798981	0.0757861	0.991588	0.999747
FBgn0013675	NA	14.8349	-0.0255244	0.104128	0.80636	0.964591
FBgn0013676	NA	16.2014	0.0159524	0.0808312	0.84355	0.970325
FBgn0013678	NA	15.2257	0.0723003	0.117406	0.538017	0.891026
FBgn0013679	NA	13.9741	-0.0907676	0.164416	0.580906	0.903769
FBgn0013680	NA	6.83144	-0.802713	0.171497	2.86007e-06	0.000183968
FBgn0013681	NA	12.9173	-0.130621	0.182467	0.474079	0.85959
FBgn0013683	NA	2.3769	0.296032	0.693057	0.669278	0.928795
FBgn0013684	NA	13.2009	-0.0810993	0.329287	0.805459	0.964589
FBgn0013685	NA	3.78743	0.071265	0.831226	0.931677	0.989102
FBgn0013686	NA	19.2741	-0.101846	0.0942093	0.279672	0.747836
FBgn0013688	NA	7.50968	-0.378403	0.293272	0.196954	0.670498
FBgn0013689	NA	2.26018	-1.71135	0.81438	0.035605	0.304353
FBgn0013690	NA	-0.547042	-2.04485	2.33004	0.38016	NA
FBgn0013694	NA	1.14529	0.988051	0.954735	0.300718	0.764087
FBgn0013698	NA	0.398463	0.240121	1.59092	0.880029	0.978595
FBgn0013699	NA	2.7581	0.722384	0.689848	0.295024	0.759615
FBgn0013704	NA	0.133515	-1.15613	1.37262	0.39963	NA
FBgn0013710	NA	4.62219	-3.08181	0.836848	0.000230827	0.00807582
FBgn0013717	not	10.6314	0.139532	0.108405	0.198045	0.671685
FBgn0013718	nuf	11.6839	0.0750005	0.0618323	0.225142	0.698076
FBgn0013720	pck	11.911	0.043059	0.066167	0.5152	0.883791
FBgn0013725	phyl	6.15307	0.274588	0.210466	0.192007	0.665037
FBgn0013726	pnut	12.5489	0.0850894	0.0409134	0.0375491	0.311336
FBgn0013732	sced	9.48002	-0.0618655	0.0609595	0.310172	0.771571
FBgn0013733	shot	13.0638	0.0173986	0.15755	0.912066	0.985364
FBgn0013746	alien	11.0512	0.00863869	0.0584899	0.882583	0.97953
FBgn0013749	Arf102F	11.1456	0.0190478	0.105462	0.856671	0.974078
FBgn0013750	Arf51F	10.9878	0.0603829	0.0763271	0.428882	0.83618
FBgn0013751	Awh	6.41867	-0.103291	0.170302	0.544171	0.892106
FBgn0013753	Bgb	10.4667	0.0479826	0.0585724	0.412671	0.826508
FBgn0013756	Mtor	12.905	0.0346455	0.0943144	0.713365	0.938143
FBgn0013759	CASK	10.5742	0.0995314	0.0994065	0.316703	0.774994
FBgn0013762	Cdk5	8.99962	0.0479402	0.0701916	0.494613	0.872027
FBgn0013763	Idgf6	10.1876	0.02827	0.28505	0.920999	0.987024
FBgn0013764	Chi	10.9371	0.0789882	0.0420225	0.0601538	0.398307
FBgn0013765	cnn	10.6974	0.00745593	0.114379	0.948026	0.991379
FBgn0013770	Cp1	12.0145	-0.00209377	0.0615665	0.972871	0.997275
FBgn0013771	Cyp6a9	1.43854	0.679892	1.35281	0.615261	0.91363
FBgn0013772	Cyp6a8	1.81569	-2.13877	1.90576	0.26175	0.734999
FBgn0013773	Cyp6a22	1.00755	-2.29379	1.55624	0.1405	0.59316
FBgn0013799	Deaf1	10.4272	-0.0149165	0.0867799	0.863525	0.974819
FBgn0013810	Dhc36C	3.85923	0.651947	0.527251	0.216272	0.689231
FBgn0013811	Dhc62B	5.74924	0.374826	0.229703	0.102724	0.516913
FBgn0013812	Dhc93AB	6.44032	0.487239	0.240348	0.0426393	0.332259
FBgn0013813	Dhc98D	1.1734	0.777875	1.41917	0.583611	0.903852
FBgn0013949	Elal	3.47538	-2.55306	0.997613	0.0104922	0.146044
FBgn0013953	Esp	4.07088	0.993917	0.350558	0.0045791	0.0819019
FBgn0013954	Fkbp12	13.5025	0.0377121	0.0801192	0.637855	0.919871
FBgn0013972	Gycalpha99B	0.197572	-2.39248	1.80016	0.183835	NA
FBgn0013973	Gycbeta100B	0.547795	0.8141	1.35154	0.546942	0.89338
FBgn0013981	His4r	14.0048	-0.0472172	0.0728918	0.517133	0.884609
FBgn0013983	imd	8.49898	0.0245607	0.0795014	0.757372	0.95535
FBgn0013987	MAPk-Ak2	11.7089	-0.151314	0.0406657	0.0001985	0.00721285
FBgn0013995	Calx	1.57516	0.0152823	1.21203	0.98994	0.999747
FBgn0013997	Nrx-IV	13.0937	0.0460089	0.0815849	0.572795	0.902597
FBgn0014000	Hf	3.08793	-1.78659	0.85918	0.0375791	0.311336
FBgn0014006	Ask1	11.0418	-0.00864874	0.0673835	0.897871	0.983329
FBgn0014007	Ptp69D	10.9976	-0.0460223	0.0731243	0.529106	0.888929
FBgn0014009	Rab2	10.7547	0.0528993	0.0535492	0.32322	0.779666
FBgn0014010	Rab5	11.899	0.150673	0.0717001	0.0356034	0.304353
FBgn0014011	Rac2	10.9072	0.135999	0.0691858	0.0493318	0.363099
FBgn0014018	Rel	10.2662	0.0313446	0.0622027	0.614324	0.91363
FBgn0014019	Rh5	3.51972	-0.255952	0.398601	0.520792	0.885893
FBgn0014020	Rho1	13.3086	0.0889355	0.0458855	0.0525983	0.374113
FBgn0014022	Rlb1	8.61636	0.00521468	0.107296	0.961237	0.994662
FBgn0014023	mRpL47	9.48703	-0.0892187	0.0921057	0.332717	0.783231
FBgn0014024	Rnp4F	11.058	0.0789597	0.0720391	0.273049	0.744058
FBgn0014026	RpL7A	15.9734	0.111746	0.0594335	0.0600817	0.398307
FBgn0014028	SdhB	10.9882	-0.0541383	0.0537031	0.313404	0.774323
FBgn0014029	2024-09-02	11.4475	0.0369574	0.0412942	0.370798	0.803344
FBgn0014031	Spat	3.704	-3.86569	1.30778	NA	NA
FBgn0014032	Sptr	9.31525	-0.0054097	0.112381	0.961607	0.994896
FBgn0014033	Sr-CI	8.33728	-0.0263923	0.41687	0.949519	0.991552
FBgn0014037	Su(Tpl)	11.7579	-0.0254221	0.105284	0.809196	0.965858
FBgn0014073	Tie	7.31554	-0.354145	0.242276	0.143811	0.596807
FBgn0014075	Uggt	11.8788	0.0562761	0.0875273	0.520253	0.885893
FBgn0014076	Vm32E	2.25617	0.541964	0.849253	0.523366	0.886841
FBgn0014092	CG4278	9.68402	0.0339143	0.0859593	0.693183	0.933985
FBgn0014127	barr	11.4527	0.0686262	0.0679121	0.312249	0.773436
FBgn0014133	bif	12.6644	0.117574	0.0930534	0.206406	0.680235
FBgn0014135	bnl	7.04596	-0.119858	0.163696	0.464048	0.855329
FBgn0014141	cher	12.5986	-0.178104	0.128584	0.166019	0.630257
FBgn0014163	fax	15.1985	0.163228	0.0812608	0.0445699	0.341395
FBgn0014179	gcm	0.860705	-0.413148	0.9027	0.647182	0.921533
FBgn0014184	Oda	13.2661	0.0145265	0.0658982	0.82553	0.968525
FBgn0014189	Hel25E	13.3179	0.0872297	0.051683	0.0914528	0.486446
FBgn0014269	prod	10.3194	0.0102888	0.0602311	0.864364	0.974881
FBgn0014340	mof	9.32695	0.0439545	0.0795033	0.580356	0.903769
FBgn0014342	mia	8.36093	-0.21156	0.142385	0.137323	0.586943
FBgn0014343	mirr	11.698	0.193415	0.0796077	0.0151156	0.182232
FBgn0014366	noi	10.7444	0.0625524	0.0572758	0.274778	0.74591
FBgn0014368	nol	1.03178	2.68472	1.61688	0.0968267	0.499123
FBgn0014380	RhoL	8.21474	0.498895	0.131177	0.00014283	0.00558951
FBgn0014388	sty	10.8291	0.205109	0.0857918	0.0168128	0.19389
FBgn0014391	sun	11.2857	-0.0640245	0.132263	0.628338	0.917173
FBgn0014395	tilB	2.14823	-1.68787	0.743929	0.0232771	0.237495
FBgn0014396	tim	0.94249	0.153633	1.17575	0.896038	0.983029
FBgn0014411	Vps26	10.9003	0.0784541	0.0628964	0.212267	0.685895
FBgn0014417	CG13397	6.3295	0.168318	0.181071	0.352595	0.795013
FBgn0014427	CG11899	11.5214	0.24421	0.111708	0.0288048	0.266454
FBgn0014455	Ahcy	11.9945	0.145413	0.0599117	0.0152193	0.182631
FBgn0014464	Cp7Fa	0.922861	1.89747	1.09725	0.083756	0.466332
FBgn0014469	Cyp4e2	9.88554	0.179103	0.130518	0.169986	0.634098
FBgn0014857	His3.3A	12.1547	0.0593455	0.0780615	0.447111	0.846252
FBgn0014859	Hr38	2.54669	-1.39285	0.842526	0.0982935	0.502929
FBgn0014861	Mcm2	11.3649	-0.118254	0.0976806	0.226042	0.698973
FBgn0014863	Mlp84B	3.88983	-1.94076	0.503066	0.000114379	0.00460897
FBgn0014868	Ost48	12.6215	0.0311239	0.0673609	0.644047	0.921377
FBgn0014869	Pglym78	10.6074	-0.0269162	0.0964913	0.780284	0.959909
FBgn0014870	Psi	12.4639	0.043408	0.0835085	0.603201	0.911641
FBgn0014877	Roe1	9.34835	-0.0345195	0.0816903	0.672612	0.929272
FBgn0014879	Set	12.4409	0.127682	0.0722523	0.0772011	0.452203
FBgn0014903	CG14630	0.965277	-0.949483	1.69265	0.574835	0.903182
FBgn0014906	Hydr2	9.80222	0.0600042	0.0860307	0.485506	0.867379
FBgn0014930	CG2846	8.69161	0.0466454	0.0923072	0.613329	0.91363
FBgn0014931	CG2678	4.17003	0.199098	0.289652	0.49185	0.870551
FBgn0014949	btn	1.92722	-1.20456	0.779126	0.122095	0.558735
FBgn0015000	betaggt-I	9.54196	-0.0759494	0.0618025	0.219107	0.69137
FBgn0015008	Actn3	-0.285859	0.308875	1.89713	0.870667	NA
FBgn0015010	Ag5r	3.6021	0.877842	0.714674	0.21933	0.691445
FBgn0015011	AhcyL2	5.26689	-0.75063	0.344533	0.029355	0.269222
FBgn0015019	CCT3	13.104	0.0309697	0.0616185	0.615242	0.91363
FBgn0015024	CkIalpha	12.9323	0.0561379	0.0530716	0.290158	0.755926
FBgn0015025	CkIIalpha-i1	7.06931	-0.0946108	0.148018	0.522702	0.88682
FBgn0015031	cype	10.9574	-0.0234873	0.121866	0.84717	0.97189
FBgn0015032	Cyp4c3	2.46169	2.05329	5.01849	NA	NA
FBgn0015033	Cyp4d8	2.50277	-2.37854	0.877094	0.00669102	0.108608
FBgn0015034	Cyp4e1	3.28983	-1.32419	0.509654	0.00937073	0.135158
FBgn0015036	Cyp4ae1	4.24275	0.0871644	0.355945	0.806548	0.964591
FBgn0015037	Cyp4p1	1.57941	-4.24923	1.79163	0.0177061	0.201057
FBgn0015039	Cyp9b2	2.8366	-3.11097	1.56191	0.0463961	0.349816
FBgn0015040	Cyp9c1	9.62641	-0.709404	0.149059	1.94359e-06	0.000133297
FBgn0015075	Ddx1	10.688	0.0261949	0.0519775	0.614285	0.91363
FBgn0015218	eIF4E1	13.0481	0.0731766	0.0399035	0.0666778	0.419771
FBgn0015221	Fer2LCH	12.0902	-0.0179432	0.0828484	0.828537	0.968983
FBgn0015222	Fer1HCH	12.2901	-0.0177252	0.0930357	0.848901	0.972265
FBgn0015229	glec	10.2861	0.213276	0.127453	0.0942538	0.492947
FBgn0015239	Hr78	11.548	0.009657	0.0920624	0.916458	0.986574
FBgn0015240	Hr96	8.6388	0.10025	0.0835036	0.229926	0.702742
FBgn0015245	Hsp60A	13.4156	-0.106071	0.0577809	0.0663953	0.419771
FBgn0015247	Diap2	10.2136	-0.0478587	0.0631945	0.448856	0.847889
FBgn0015268	Nap1	13.5125	-0.188444	0.0627223	0.00266091	0.0545671
FBgn0015269	Nf1	10.5266	0.0320778	0.124142	0.796102	0.96252
FBgn0015270	Orc2	9.03826	-0.236671	0.119045	0.0468037	0.351486
FBgn0015271	Orc5	8.80584	0.213289	0.0923234	0.0208752	0.224917
FBgn0015277	Pi3K59F	8.89955	-0.212032	0.0725854	0.00348762	0.0671334
FBgn0015278	Pi3K68D	10.9388	0.0483948	0.0970879	0.618157	0.91493
FBgn0015279	Pi3K92E	11.0735	0.07511	0.0772745	0.331056	0.782922
FBgn0015282	Rpt2	12.2377	0.0453561	0.0672515	0.500042	0.874226
FBgn0015283	Rpn10	11.7368	0.0216825	0.0827248	0.793241	0.96252
FBgn0015286	Rala	10.7907	0.136936	0.0869447	0.115263	0.543703
FBgn0015288	RpL22	15.0044	-0.0442922	0.0987834	0.653881	0.924306
FBgn0015295	Shark	10.2549	-0.056672	0.0496088	0.253296	0.726771
FBgn0015296	Shc	10.1583	-0.0153983	0.0568155	0.786373	0.961442
FBgn0015298	Srp19	9.75661	0.00586686	0.0760495	0.938508	0.989696
FBgn0015299	Ssb-c31a	9.81745	0.38211	0.113542	0.000764464	0.0218696
FBgn0015316	Try29F	5.69025	-0.278391	0.207921	0.180595	0.65052
FBgn0015320	Ubc2	11.6967	0.0288354	0.0465713	0.535807	0.890484
FBgn0015321	Ubc4	10.771	-0.0230698	0.0713543	0.746458	0.952397
FBgn0015331	abs	9.75413	0.0682391	0.107142	0.524187	0.887297
FBgn0015336	CG15865	-0.623153	0.696736	2.13159	0.743773	NA
FBgn0015338	CG5861	10.184	0.0747346	0.0559161	0.18137	0.650714
FBgn0015351	CG14906	7.45714	-0.112881	0.133565	0.398032	0.818529
FBgn0015359	CG2034	9.7385	0.105375	0.0662441	0.111674	0.537846
FBgn0015360	oxt	8.60308	0.040949	0.110897	0.711941	0.937706
FBgn0015371	chn	11.3141	-0.0420279	0.121162	0.728686	0.944592
FBgn0015372	RabX1	8.55692	-0.15079	0.0826329	0.0680294	0.422117
FBgn0015376	cutlet	9.05575	-0.0527652	0.114654	0.645364	0.921533
FBgn0015379	dod	10.6283	0.0115355	0.088022	0.895734	0.982963
FBgn0015380	drl	12.2584	0.119127	0.0686628	0.0827489	0.464219
FBgn0015391	glu	11.5273	0.0411475	0.0989772	0.67761	0.93106
FBgn0015396	jumu	11.9516	-0.0685269	0.165689	0.679176	0.931102
FBgn0015399	kek1	12.0084	0.284205	0.0877453	0.0011996	0.0307502
FBgn0015400	kek2	4.44906	0.98303	0.443953	0.0268105	0.255547
FBgn0015402	ksr	10.0292	0.000195772	0.0859787	0.998183	1
FBgn0015477	Rme-8	11.4021	0.134231	0.117716	0.254162	0.727875
FBgn0015509	Cul1	12.3135	0.0305465	0.0657367	0.642162	0.920728
FBgn0015513	mbc	11.0705	0.11448	0.106285	0.281436	0.748365
FBgn0015519	nAChRalpha3	1.22257	-0.776431	1.23496	0.529538	0.888946
FBgn0015520	nonA-l	9.50486	0.145074	0.102368	0.156429	0.615445
FBgn0015521	RpS21	14.2727	-0.112033	0.0995774	0.260554	0.733726
FBgn0015522	olf186-M	5.53406	-0.158387	0.220775	0.473121	0.858766
FBgn0015527	peng	11.2433	-0.114823	0.0604435	0.0574765	0.391491
FBgn0015543	snoRNA:Me28S-A1322	6.95883	-0.154008	0.205245	0.453036	0.84906
FBgn0015544	spag	9.11886	0.241855	0.0800497	0.00251686	0.0524439
FBgn0015546	spel1	10.6237	-0.0228389	0.0872323	0.793462	0.96252
FBgn0015553	tos	7.96519	0.01103	0.140231	0.937306	0.989696
FBgn0015558	tty	6.4344	0.321067	0.205495	0.118191	0.551068
FBgn0015561	unpg	4.13186	0.00436598	0.520214	0.993304	0.999772
FBgn0015568	alpha-Est1	3.31206	-0.49016	0.95046	0.606059	0.912593
FBgn0015569	alpha-Est10	6.54315	0.758056	0.299647	0.0114118	0.15206
FBgn0015570	alpha-Est2	4.07277	-5.33193	2.0603	NA	NA
FBgn0015571	alpha-Est3	7.25393	0.273299	0.129124	0.0342969	0.298036
FBgn0015572	alpha-Est4	5.83781	-1.2085	0.31917	0.00015285	0.00586214
FBgn0015574	alpha-Est6	-0.759126	-1.4354	3.42592	0.675229	NA
FBgn0015575	alpha-Est7	4.95993	-2.07478	0.877631	0.0180756	0.203027
FBgn0015576	alpha-Est8	4.51626	-0.518815	0.604111	0.390447	0.815935
FBgn0015577	alpha-Est9	3.67044	-0.164306	0.553399	0.76654	0.957343
FBgn0015582	dare	8.77834	0.0224531	0.0701753	0.749	0.953373
FBgn0015586	Acp76A	-0.524195	0.00602958	1.97644	0.997566	NA
FBgn0015589	Apc	10.4877	0.0215676	0.122441	0.860178	0.974819
FBgn0015591	AstA	4.10016	-1.264	0.678999	0.0626644	0.406867
FBgn0015600	toc	10.4424	-0.0173827	0.104606	0.868021	0.975454
FBgn0015602	BEAF-32	10.7333	0.0995902	0.0507297	0.0496283	0.363988
FBgn0015609	CadN	9.6166	0.341653	0.148207	0.021153	0.226303
FBgn0015614	CanB2	10.6736	0.0543632	0.048451	0.261852	0.735088
FBgn0015615	SMC3	11.0876	-0.0181	0.0735699	0.805664	0.964589
FBgn0015618	Cdk8	8.84616	0.0459755	0.0843521	0.585724	0.904948
FBgn0015621	Clp	8.97153	-0.0163245	0.085541	0.848652	0.972265
FBgn0015622	Cnx99A	12.1721	0.114221	0.0952817	0.230615	0.703743
FBgn0015623	Cpr	11.2115	0.050402	0.0795488	0.526343	0.888331
FBgn0015625	CycB3	10.9618	0.0212169	0.079621	0.789874	0.961944
FBgn0015663	Ugt36A1	7.47959	-0.146696	0.171414	0.392109	0.815935
FBgn0015664	Dref	11.5066	0.0634701	0.0537575	0.237732	0.712988
FBgn0015714	Cyp6a17	7.37956	0.354694	0.212279	0.0947434	0.493791
FBgn0015721	ktub	1.87127	0.472117	0.769645	0.539598	0.891611
FBgn0015737	Hmu	12.4821	0.151298	0.0862289	0.0793268	0.456526
FBgn0015754	Lis-1	11.6215	0.071511	0.0542035	0.187067	0.660117
FBgn0015756	RpL9	14.8907	-0.00549633	0.0820142	0.946568	0.991112
FBgn0015765	p38a	8.84531	0.0739932	0.113883	0.515868	0.884053
FBgn0015766	Msr-110	13.8954	0.0691433	0.088074	0.432419	0.837347
FBgn0015772	Nak	10.4521	0.0693161	0.0946657	0.464034	0.855329
FBgn0015773	NetA	9.11248	0.0621351	0.290765	0.830785	0.968983
FBgn0015774	NetB	10.2614	0.230366	0.137823	0.0946296	0.493695
FBgn0015776	nrv1	10.6499	0.0266162	0.0729368	0.71517	0.939528
FBgn0015777	nrv2	11.9898	0.0737071	0.0708315	0.298063	0.761899
FBgn0015778	rin	14.2966	0.031206	0.0762734	0.682442	0.931331
FBgn0015781	P5cr	9.22442	0.191409	0.0748459	0.0105466	0.146096
FBgn0015789	Rab10	10.744	0.0986117	0.0562981	0.0798428	0.458344
FBgn0015790	Rab11	12.6908	0.159685	0.0644427	0.0132142	0.16648
FBgn0015791	Rab14	9.71682	-0.107805	0.0558375	0.0535206	0.376335
FBgn0015793	Rab19	8.49368	0.0126031	0.0991461	0.898848	0.983717
FBgn0015794	Rab18	9.16977	-0.0199884	0.100034	0.841624	0.970325
FBgn0015795	Rab7	11.3598	0.091208	0.0500975	0.0686661	0.423478
FBgn0015797	Rab6	10.9242	0.171901	0.138338	0.214009	0.687859
FBgn0015799	Rbf	11.4646	-0.0764255	0.0565245	0.17635	0.64367
FBgn0015801	Reg-5	9.65429	0.12129	0.143471	0.397887	0.818529
FBgn0015803	RtGEF	9.99702	0.146059	0.0818191	0.0742376	0.441081
FBgn0015805	HDAC1	12.652	0.11313	0.0491031	0.0212273	0.226628
FBgn0015808	ScpX	10.5858	-0.034653	0.0658542	0.598744	0.908931
FBgn0015818	Spx	10.4496	0.0171883	0.0782148	0.82606	0.9686
FBgn0015828	TfIIEalpha	9.50392	-0.056496	0.0930908	0.543923	0.891982
FBgn0015829	TfIIEbeta	9.17735	-0.0504281	0.0825678	0.541366	0.891614
FBgn0015831	Rtnl2	2.31358	0.775749	0.809017	0.33762	0.78632
FBgn0015834	eIF3i	12.8249	0.0336249	0.0577628	0.560486	0.896986
FBgn0015838	Vang	12.0051	0.0597098	0.0735913	0.417154	0.829596
FBgn0015872	Drip	10.1445	-0.214247	0.123696	0.0832661	0.46597
FBgn0015903	apt	8.66363	-0.0623459	0.181964	0.731879	0.945644
FBgn0015904	ara	11.3442	0.136984	0.0783619	0.0804476	0.458511
FBgn0015905	ast	9.40239	0.0255724	0.0721786	0.723119	0.943389
FBgn0015919	caup	11.7035	0.0191746	0.0840017	0.819441	0.966471
FBgn0015924	crq	10.1002	0.22922	0.113858	0.0440928	0.338492
FBgn0015925	csul	9.66582	0.0227101	0.0654288	0.728519	0.944592
FBgn0015926	dah	9.75451	-0.0619288	0.0893672	0.488328	0.868772
FBgn0015929	dpa	11.4735	-0.196895	0.098479	0.0455691	0.345725
FBgn0015949	hrg	12.2798	0.0503262	0.049578	0.310062	0.771505
FBgn0016013	Faa	4.89494	0.347967	0.385627	0.366876	0.801391
FBgn0016032	lbm	4.33882	-0.465027	0.400385	0.24546	0.720131
FBgn0016034	mael	5.52396	-0.526293	0.229026	0.0215637	0.228461
FBgn0016036	mei-P22	3.40201	-0.0956993	0.577342	0.868347	0.975454
FBgn0016038	Vsp37A	10.164	0.106432	0.0685788	0.120671	0.55647
FBgn0016041	Tom40	11.0301	-0.00473516	0.0732759	0.948476	0.991379
FBgn0016047	nompA	-0.197288	0.526216	1.86335	0.777635	NA
FBgn0016053	pgc	3.42917	-0.922955	0.53472	0.0843379	0.469067
FBgn0016054	phr6-4	8.67174	-0.130502	0.109637	0.233922	0.707604
FBgn0016059	Sema1b	12.7409	-0.0155569	0.0769207	0.839725	0.969909
FBgn0016061	side	6.61537	-0.051023	0.377886	0.892594	0.982641
FBgn0016070	smg	10.0774	0.0894668	0.0950242	0.34644	0.792312
FBgn0016075	vkg	11.2866	-0.207165	0.303231	0.494485	0.872027
FBgn0016076	vri	10.2721	-0.100013	0.16663	0.548366	0.894245
FBgn0016078	wun	9.51825	0.100102	0.136363	0.462895	0.855329
FBgn0016081	fry	11.1858	0.0253598	0.134503	0.85045	0.972524
FBgn0016119	ATPsynCF6	11.4176	-0.0471723	0.0790384	0.550622	0.89457
FBgn0016120	ATPsynD	11.9096	0.011504	0.0881665	0.896187	0.983029
FBgn0016122	Acer	5.71245	-0.665341	0.24114	0.00579514	0.0983861
FBgn0016126	CaMKI	11.9135	-0.0285078	0.0561744	0.611813	0.912734
FBgn0016131	Cdk4	10.8947	0.114369	0.0435561	0.00864497	0.126809
FBgn0016641	PTP-ER	9.89175	0.107914	0.115442	0.349899	0.794372
FBgn0016660	H15	3.18867	0.131727	0.814881	0.87158	0.977192
FBgn0016672	Ipp	9.2069	-0.0680838	0.0701126	0.331516	0.783147
FBgn0016684	NaPi-T	5.28625	0.160294	0.285649	0.57469	0.903182
FBgn0016685	Nlp	13.5025	0.0526988	0.091482	0.564577	0.899337
FBgn0016687	Nurf-38	12.286	-0.0650165	0.0721929	0.367805	0.801391
FBgn0016691	ATPsynO	12.1484	0.00394085	0.0821782	0.961752	0.994896
FBgn0016693	Past1	11.2392	0.0972386	0.134205	0.468726	0.85623
FBgn0016694	Pdp1	8.5252	-0.288539	0.16066	0.0725009	0.436269
FBgn0016696	Pitslre	12.0872	0.0725678	0.0682743	0.287834	0.753157
FBgn0016697	Prosalpha5	11.5233	0.0771879	0.0939408	0.411267	0.825727
FBgn0016698	Ptpa	9.38315	0.0517446	0.0823887	0.529969	0.888946
FBgn0016701	Rab4	10.4246	-0.0496151	0.0530844	0.349971	0.794372
FBgn0016715	Reg-2	6.51229	-0.541104	0.436953	0.215584	0.689062
FBgn0016726	RpL29	14.5103	-0.0118885	0.123775	0.923481	0.987859
FBgn0016754	sba	10.0898	0.232679	0.135823	0.0866925	0.475676
FBgn0016756	Usp47	12.3478	0.00409965	0.0824046	0.960321	0.994357
FBgn0016762	angel	7.9246	0.140196	0.112036	0.210808	0.685127
FBgn0016794	dos	10.1617	0.0821683	0.0845122	0.330918	0.782922
FBgn0016797	fz2	13.4749	0.0717733	0.0972351	0.460428	0.853534
FBgn0016917	Stat92E	12.1507	-0.0278508	0.0803775	0.728967	0.944592
FBgn0016919	nompB	-0.447818	-1.10024	2.99018	0.71291	NA
FBgn0016926	Pino	10.3675	0.140772	0.0730032	0.053818	0.376335
FBgn0016930	Dyrk2	11.4299	0.318944	0.199921	0.110633	0.535633
FBgn0016970	l(2)k10201	7.66795	-0.0675485	0.120012	0.573538	0.902804
FBgn0016974	swaPsi	-0.954625	-0.574313	2.95908	0.846109	NA
FBgn0016977	spen	13.1361	0.0152209	0.141579	0.914386	0.98638
FBgn0016978	snRNP-U1-70K	11.4263	0.12115	0.0473709	0.0105435	0.146096
FBgn0016983	smid	12.2879	0.0803796	0.0660547	0.223655	0.696175
FBgn0016984	sktl	10.9453	0.138376	0.064289	0.031366	0.281478
FBgn0017414	cag	8.56178	-0.00434742	0.102905	0.966302	0.995357
FBgn0017418	ari-1	10.2266	0.0154731	0.0720344	0.829922	0.968983
FBgn0017424	asRNA:CR11538	7.80614	-4.56114	1.32245	0.000562673	0.0172398
FBgn0017429	CG5989	8.80516	0.133006	0.0841	0.113759	0.540909
FBgn0017430	Nelf-E	9.20163	-0.166142	0.0918951	0.0706139	0.43067
FBgn0017457	U2af38	10.8704	0.0397183	0.0694406	0.567339	0.901267
FBgn0017482	T3dh	7.30968	-0.557662	0.117121	1.9223e-06	0.000133297
FBgn0017545	RpS3A	15.4928	-0.00515354	0.092211	0.955431	0.993701
FBgn0017550	Rga	12.0462	0.0798441	0.0524418	0.127877	0.569834
FBgn0017551	Rca1	10.046	0.055745	0.0806938	0.489678	0.869657
FBgn0017558	Pdk	9.57073	0.113831	0.0966226	0.238758	0.714028
FBgn0017566	ND-75	11.3817	0.0317326	0.0608413	0.601974	0.910344
FBgn0017567	ND-23	9.89858	0.060955	0.0773314	0.430562	0.836787
FBgn0017572	Mo25	11.4831	0.0939361	0.0710908	0.186383	0.659667
FBgn0017577	Mcm5	11.19	-0.0260764	0.108104	0.809388	0.965858
FBgn0017578	Max	10.1136	-0.0518698	0.0727604	0.475917	0.861229
FBgn0017579	RpL14	15.1636	0.00145653	0.0945417	0.987708	0.999747
FBgn0017581	Lk6	13.7084	-0.0105038	0.0970371	0.913801	0.986231
FBgn0017590	klg	0.780752	0.00578667	1.20194	0.996159	1
FBgn0019624	COX5A	11.4199	-0.00954257	0.0900612	0.915617	0.986438
FBgn0019637	Atu	11.0437	0.113802	0.0469933	0.0154497	0.18432
FBgn0019643	AANAT1	3.75161	0.642539	0.455874	0.158698	0.619934
FBgn0019644	ATPsynB	12.1326	-0.0197048	0.0696574	0.777267	0.959909
FBgn0019650	toy	0.633956	0.591814	2.08422	0.776449	0.95965
FBgn0019660	lncRNA:roX2	4.78097	0.981735	3.50914	0.779658	0.959909
FBgn0019661	lncRNA:roX1	9.37704	1.0352	1.47099	0.481592	0.864182
FBgn0019662	qm	9.44997	0.0154368	0.0744383	0.835715	0.969196
FBgn0019686	lok	10.5286	-0.028558	0.0607795	0.638453	0.920209
FBgn0019830	colt	10.8342	0.0607232	0.0694714	0.382077	0.810843
FBgn0019890	Smg5	11.8856	-0.0349293	0.0749058	0.640994	0.920728
FBgn0019925	Surf4	11.8066	0.170393	0.0647945	0.00854487	0.126415
FBgn0019932	SamDC	9.13078	0.190965	0.0921587	0.0382534	0.314656
FBgn0019936	RpS20	14.9873	-0.134334	0.0764618	0.0789384	0.456187
FBgn0019938	RpI1	11.1184	-0.122773	0.0831605	0.139854	0.591877
FBgn0019949	Cdk9	9.26657	-0.0846176	0.0703581	0.229104	0.702158
FBgn0019952	Orct	7.54927	-0.117455	0.194352	0.545616	0.892931
FBgn0019957	ND-42	10.8957	-0.013095	0.0504577	0.79523	0.96252
FBgn0019960	Mitofilin	11.5604	-0.00550152	0.0588144	0.925474	0.987859
FBgn0019968	Khc-73	11.4959	0.0935076	0.116341	0.421549	0.832607
FBgn0019972	Drice	11.0004	0.138375	0.0632378	0.0286574	0.266406
FBgn0019982	Gs1l	8.60387	-0.101812	0.131081	0.437329	0.841692
FBgn0019985	mGluR	2.24251	-0.702523	0.732705	0.337656	0.78632
FBgn0019990	Gcn2	10.6607	-0.0834139	0.0775013	0.281797	0.748365
FBgn0020018	Ppox	8.92798	0.011628	0.0739325	0.875025	0.978203
FBgn0020224	Cbl	10.5409	0.116323	0.0614674	0.0584325	0.394544
FBgn0020235	ATPsyngamma	12.3453	-0.0140861	0.0829029	0.865081	0.975158
FBgn0020236	ATPCL	12.1725	0.111092	0.0725043	0.12547	0.564941
FBgn0020238	14-3-3epsilon	15.3246	0.0667778	0.0479276	0.163527	0.627207
FBgn0020248	stet	0.615869	1.79327	1.50397	0.233121	0.707147
FBgn0020249	stck	10.5491	-0.0374094	0.0576896	0.516687	0.884445
FBgn0020251	sfl	9.68009	0.135287	0.0913481	0.138606	0.590217
FBgn0020255	Ran	13.9408	0.0575466	0.0682587	0.399192	0.819863
FBgn0020257	Ppa	12.5512	0.0726892	0.0683229	0.287371	0.753157
FBgn0020258	ppk	5.25603	-0.209604	0.274286	0.444759	0.845494
FBgn0020261	pcm	11.3485	0.0376037	0.0972278	0.698935	0.935647
FBgn0020269	mspo	6.58354	0.337619	0.192359	0.0792333	0.456526
FBgn0020270	mre11	10.1416	-0.3267	0.0762626	1.83658e-05	0.000941564
FBgn0020272	mst	9.01891	0.519613	0.0682199	2.60169e-14	6.41503e-12
FBgn0020277	lush	1.13645	-0.951319	0.965376	0.324409	0.779666
FBgn0020278	loco	10.496	0.0547607	0.0921252	0.552234	0.89457
FBgn0020279	lig	14.1107	0.0862655	0.108824	0.427951	0.83618
FBgn0020294	ko	11.866	0.00249038	0.0777626	0.974452	0.997275
FBgn0020299	stumps	10.1387	0.05529	0.099775	0.579479	0.903769
FBgn0020300	geko	8.68827	0.269322	0.169308	0.111672	0.537846
FBgn0020304	drongo	11.2699	0.066953	0.0850386	0.431092	0.836811
FBgn0020305	dbe	9.86238	0.0333323	0.0866491	0.700474	0.936497
FBgn0020306	dom	13.6223	0.0524912	0.123315	0.67035	0.929157
FBgn0020307	dve	10.7051	0.162287	0.123394	0.188444	0.662678
FBgn0020309	crol	13.9368	0.0354052	0.10241	0.729554	0.944642
FBgn0020312	Tmtc3	10.864	-0.0100269	0.0681372	0.883008	0.97953
FBgn0020369	Rpt6	12.0167	0.0280828	0.0746277	0.70669	0.937706
FBgn0020370	TppII	12.0539	0.0353729	0.0737792	0.631624	0.917173
FBgn0020372	TM4SF	2.96741	0.614826	0.640587	0.337164	0.786234
FBgn0020376	Sr-CIII	2.79919	-2.50884	0.951496	0.00837075	0.12473
FBgn0020378	Sp1	5.76039	0.625968	0.818987	0.444676	0.845494
FBgn0020379	Rfx	8.4045	0.124093	0.107716	0.249306	0.722994
FBgn0020381	Dredd	10.2414	0.0755847	0.0925853	0.414283	0.827692
FBgn0020385	pug	10.2091	-0.308294	0.139053	0.0266168	0.254989
FBgn0020386	Pdk1	10.9654	0.280297	0.149447	0.0607159	0.400173
FBgn0020388	Gcn5	10.2976	0.175265	0.0725121	0.0156473	0.185564
FBgn0020389	Papss	9.62837	0.150946	0.122008	0.216017	0.689062
FBgn0020391	Nrk	6.33708	-0.274311	0.202972	0.176544	0.643765
FBgn0020392	Nmt	11.2588	-0.0391395	0.0657055	0.551389	0.89457
FBgn0020399	Mst89B	3.0105	0.16209	0.455388	0.721887	0.942776
FBgn0020407	asun	8.62425	0.00307932	0.112372	0.978138	0.998254
FBgn0020412	JIL-1	11.0438	0.0735244	0.113751	0.518044	0.884853
FBgn0020414	Idgf3	7.7612	0.0803952	0.327245	0.805935	0.964589
FBgn0020415	Idgf2	6.295	0.0846402	0.342519	0.804822	0.964589
FBgn0020416	Idgf1	6.69297	-0.276761	0.335804	0.409839	0.825578
FBgn0020440	Fak	10.3143	0.139875	0.0726227	0.0540972	0.377144
FBgn0020443	eRF3	12.808	0.0932439	0.0728708	0.200694	0.675274
FBgn0020445	E23	8.51241	0.43686	0.441184	0.322076	0.779666
FBgn0020493	Dad	11.4876	0.0498375	0.0712241	0.484098	0.86636
FBgn0020496	CtBP	14.1208	0.0202457	0.0448683	0.651827	0.923177
FBgn0020497	emb	12.5917	0.0297921	0.0830508	0.719804	0.941335
FBgn0020503	CLIP-190	10.663	0.0487515	0.0898683	0.58749	0.904948
FBgn0020506	Amyrel	-0.972254	0	5.20164	1	NA
FBgn0020508	Ag5r2	1.5564	1.67913	2.38625	0.48164	0.864182
FBgn0020510	Abi	10.5975	0.107825	0.0487626	0.0270199	0.256479
FBgn0020513	Paics	11.6754	-0.0449255	0.0718796	0.531964	0.889556
FBgn0020518	snoRNA:Me28S-G764	0.251891	1.25514	1.41742	0.375881	NA
FBgn0020521	pio	13.2999	0.221116	0.233555	0.34377	0.790319
FBgn0020545	kraken	9.1608	-0.109375	0.0985754	0.267191	0.739359
FBgn0020616	SA	11.0897	0.0161561	0.0701877	0.817949	0.96599
FBgn0020618	Rack1	15.6897	0.0509127	0.0590412	0.388508	0.815036
FBgn0020620	RN-tre	10.3963	0.145063	0.0529121	0.0061145	0.101153
FBgn0020621	Pkn	11.9911	0.152254	0.116478	0.191164	0.664566
FBgn0020622	Pi3K21B	10.8625	-0.0391189	0.0849628	0.645212	0.921533
FBgn0020626	Osbp	10.4141	0.034445	0.0673376	0.608982	0.912593
FBgn0020633	Mcm7	11.6469	-0.104284	0.107684	0.332835	0.783231
FBgn0020637	Lcp65Ag2	3.19955	-2.18556	0.964911	0.0235104	0.238274
FBgn0020638	Lcp65Ag1	-0.280977	-3.4007	2.8072	0.225735	NA
FBgn0020639	Lcp65Af	1.40106	-3.5165	1.53737	0.0221758	0.230806
FBgn0020640	Lcp65Ae	-0.4779	-3.95741	3.91328	0.311884	NA
FBgn0020641	Lcp65Ad	2.49719	-0.912409	0.925292	0.324095	0.779666
FBgn0020647	KrT95D	10.29	-0.00610481	0.117557	0.958584	0.994201
FBgn0020653	Trxr-1	13.1486	0.0339704	0.0415569	0.413675	0.827531
FBgn0020655	ArfGAP1	10.4195	0.116032	0.101299	0.252027	0.725919
FBgn0020660	eIF4B	10.5038	0.0596538	0.0488612	0.22213	0.693304
FBgn0020762	Atet	9.13194	0.11632	0.179289	0.516477	0.884445
FBgn0020764	Alas	9.86391	-0.0544508	0.0949254	0.566227	0.900607
FBgn0020767	Spred	11.1527	-0.200904	0.0616996	0.00112928	0.029607
FBgn0020880	CG7179	1.2382	-0.0144017	1.18732	0.990322	0.999747
FBgn0020887	Su(z)12	10.8756	0.0127307	0.0642911	0.843032	0.970325
FBgn0020906	Jon25Bi	0.509661	0	5.20164	1	1
FBgn0020907	Scp2	-0.0693056	-1.78613	1.79221	0.318953	NA
FBgn0020908	Scp1	-0.201597	-0.841287	1.57855	0.594067	NA
FBgn0020909	Rtc1	9.53689	0.127736	0.115122	0.267185	0.739359
FBgn0020910	RpL3	16.4948	0.000463521	0.0564491	0.993448	0.99982
FBgn0020912	Ptx1	0.0864252	-0.0598288	3.05528	0.984377	NA
FBgn0020930	Dgkepsilon	9.59194	-0.099826	0.0664933	0.13328	0.577992
FBgn0021738	Crg-1	-1.02007	0.71586	2.47022	0.771972	NA
FBgn0021742	C901	0.804627	0.565347	1.02864	0.58259	0.903852
FBgn0021750	SerRS-m	9.12122	-0.0289137	0.0653108	0.657976	0.925022
FBgn0021760	chb	11.1855	0.0335533	0.103584	0.745996	0.952397
FBgn0021761	Nup154	11.7318	-0.109359	0.0602059	0.0693057	0.4257
FBgn0021764	sdk	12.4298	0.103436	0.133396	0.438101	0.842264
FBgn0021765	scu	11.6991	-0.106912	0.0932441	0.251555	0.725629
FBgn0021767	org-1	-0.444022	2.74465	1.64956	0.0961382	NA
FBgn0021768	nudC	11.1646	-0.105871	0.0798082	0.184654	0.655975
FBgn0021776	mira	5.82502	0.0189226	0.286509	0.947342	0.991198
FBgn0021795	Tapdelta	12.2666	0.0228977	0.111852	0.837796	0.969909
FBgn0021796	Tor	11.2961	0.105318	0.120427	0.381824	0.810707
FBgn0021800	Reph	9.45649	0.0266731	0.0939167	0.776404	0.95965
FBgn0021814	Vps28	9.5611	-0.0349354	0.0800113	0.662379	0.926663
FBgn0021825	DCTN2-p50	10.7025	0.0558137	0.0628007	0.374141	0.805109
FBgn0021847	Ttc7	9.4522	-0.0624389	0.0852765	0.46405	0.855329
FBgn0021856	l(2)k14505	9.51412	-0.0336177	0.0603263	0.577346	0.903538
FBgn0021872	Xbp1	12.2708	0.0688195	0.159605	0.666333	0.927684
FBgn0021874	Nle	9.69709	-0.104283	0.0649045	0.108118	0.530056
FBgn0021875	Zfrp8	9.08561	-0.132425	0.0781976	0.0903678	0.485031
FBgn0021895	ytr	12.5434	0.0330049	0.0555234	0.552223	0.89457
FBgn0021906	RFeSP	10.7643	0.0160023	0.0955224	0.866957	0.975454
FBgn0021944	Coprox	10.2774	0.0873385	0.0631396	0.166585	0.631229
FBgn0021967	ND-PDSW	10.2943	0.116876	0.0892185	0.190196	0.663895
FBgn0021979	l(2)k09913	12.3561	0.0398217	0.040673	0.327546	0.781051
FBgn0021995	Rs1	10.7883	-0.0555971	0.0562688	0.323122	0.779666
FBgn0022023	eIF3h	12.528	0.082321	0.0732575	0.261132	0.734659
FBgn0022027	Vps25	8.97492	0.0835824	0.0939021	0.373411	0.80463
FBgn0022029	l(2)k01209	10.6647	0.0121473	0.045234	0.788282	0.961743
FBgn0022069	Nnp-1	11.3573	-0.0607842	0.0588354	0.301547	0.764646
FBgn0022097	Vha36-1	10.4479	0.0295078	0.0718345	0.681238	0.931331
FBgn0022153	l(2)k05819	11.0936	-0.0400166	0.0701076	0.568144	0.901577
FBgn0022160	Gpo1	7.46053	0.072347	0.181962	0.690929	0.933057
FBgn0022213	Cse1	12.4884	0.0221106	0.0704314	0.753574	0.954152
FBgn0022224	ubl	8.98015	0.0104009	0.111139	0.925439	0.987859
FBgn0022238	lolal	12.115	0.106988	0.0516496	0.0383205	0.314661
FBgn0022288	l(2)09851	10.6697	-0.00441177	0.0851722	0.958689	0.994211
FBgn0022338	dnk	9.53951	-0.175749	0.147603	0.233775	0.707604
FBgn0022343	CG3760	11.9609	0.0551438	0.0939424	0.557207	0.896028
FBgn0022344	CG10340	9.57469	-0.0495076	0.0861719	0.565615	0.900048
FBgn0022349	CG1910	12.9251	0.0459664	0.0810626	0.570681	0.902282
FBgn0022355	Tsf1	8.53698	-0.441388	0.442494	0.318521	0.777423
FBgn0022359	Sodh-2	4.58843	-0.232174	0.292755	0.42774	0.836133
FBgn0022361	Pur-alpha	11.4069	0.00436005	0.068454	0.949215	0.991552
FBgn0022382	Pka-R2	9.3586	-0.00449979	0.0678046	0.947088	0.991112
FBgn0022699	D19B	10.3643	0.0489079	0.078232	0.531863	0.889556
FBgn0022702	Cht2	12.0465	-0.0119553	0.0785155	0.878976	0.978595
FBgn0022709	Ak1	6.92327	-0.0335868	0.160129	0.833864	0.969196
FBgn0022710	Ac13E	8.26781	-0.0479338	0.172867	0.781559	0.960122
FBgn0022724	Taf8	8.87496	0.00122731	0.0851801	0.988504	0.999747
FBgn0022764	Sin3A	13.4534	0.0161019	0.134884	0.904977	0.984289
FBgn0022768	Pp2C1	10.582	-0.0912268	0.109801	0.406064	0.824295
FBgn0022770	Peritrophin-A	5.56192	-0.189101	0.367286	0.606651	0.912593
FBgn0022774	Oat	8.14371	0.317652	0.274945	0.247956	0.722141
FBgn0022786	Hira	9.71916	0.0666738	0.0723288	0.356626	0.795854
FBgn0022787	Hel89B	11.3328	0.0566839	0.118665	0.632879	0.917173
FBgn0022800	Cad96Ca	9.42732	-2.26441	0.170583	3.25237e-40	5.61358e-37
FBgn0022893	Df31	16.2848	-0.0212176	0.0648145	0.743396	0.951408
FBgn0022935	D19A	10.6128	0.0141541	0.0678691	0.8348	0.969196
FBgn0022936	CycH	9.15695	0.0084466	0.0784623	0.914272	0.98638
FBgn0022942	Cbp80	11.7481	0.0837451	0.0679821	0.217998	0.689518
FBgn0022943	Cbp20	9.42248	-0.0257344	0.100534	0.797968	0.962805
FBgn0022959	yps	14.3142	-0.0540228	0.0385111	0.160681	0.622641
FBgn0022960	vimar	10.81	0.111221	0.0697332	0.110724	0.53582
FBgn0022981	rpk	8.58869	-0.119012	0.152716	0.4358	0.840191
FBgn0022984	qkr58E-3	11.4696	0.115321	0.086234	0.181123	0.650693
FBgn0022985	qkr58E-2	10.7434	-0.0565438	0.0557233	0.310238	0.771571
FBgn0022986	qkr58E-1	10.9811	0.0977152	0.0773421	0.206439	0.680235
FBgn0022987	qkr54B	10.9226	-0.0517952	0.0987574	0.599952	0.909279
FBgn0023000	mth	11.8561	0.1238	0.0660144	0.0607447	0.400173
FBgn0023001	melt	11.3041	0.0754353	0.0881811	0.392297	0.815935
FBgn0023023	CRMP	8.5135	0.0222121	0.197819	0.910597	0.985364
FBgn0023081	gek	10.9664	0.138609	0.0899806	0.123456	0.560997
FBgn0023083	fray	10.2889	0.073074	0.0647778	0.25929	0.732062
FBgn0023090	dtr	5.81541	-1.27791	0.242126	1.30704e-07	1.12659e-05
FBgn0023094	cyc	9.73918	0.065358	0.0854857	0.44454	0.845494
FBgn0023095	caps	10.7413	0.150643	0.0662867	0.02305	0.236343
FBgn0023096	btv	3.78063	0.0303014	0.551465	0.956181	0.993952
FBgn0023097	bon	11.7772	0.0149521	0.101857	0.883294	0.97953
FBgn0023129	aay	6.65543	1.14937	0.335167	0.000605275	0.0181163
FBgn0023130	a6	9.36495	0.0239439	0.0781282	0.759248	0.955844
FBgn0023143	Uba1	14.0104	0.052012	0.0671456	0.438567	0.842635
FBgn0023167	SmD3	11.7176	-0.0010675	0.0916273	0.990705	0.999747
FBgn0023169	AMPKalpha	11.0103	0.0653144	0.0412654	0.113469	0.540528
FBgn0023170	RpL39	13.538	0.100009	0.114782	0.383596	0.81158
FBgn0023171	rnh1	9.10938	-0.0171805	0.108386	0.874054	0.977934
FBgn0023172	RhoGEF2	12.2578	0.0739864	0.122772	0.546753	0.89338
FBgn0023174	Prosbeta2	11.9525	0.0425834	0.0776714	0.583519	0.903852
FBgn0023175	Prosalpha7	11.9349	0.0899885	0.0880053	0.306528	0.768492
FBgn0023177	Pp4-19C	11.9042	0.0788306	0.0495769	0.11182	0.537846
FBgn0023179	amon	0.765135	-1.15529	1.40067	0.409476	0.825371
FBgn0023180	Orc6	7.48495	-0.190272	0.133809	0.155036	0.612931
FBgn0023181	Orc4	9.31114	0.0762728	0.106508	0.473915	0.85959
FBgn0023197	Jon74E	-0.756612	0.712894	3.45636	0.836591	NA
FBgn0023212	EloB	11.11	0.0712839	0.0636791	0.262959	0.735958
FBgn0023213	eIF4G1	13.4764	0.0350028	0.10374	0.73581	0.947728
FBgn0023214	edl	8.90593	0.0921212	0.0897308	0.30459	0.767119
FBgn0023215	Mnt	10.0025	0.119697	0.27803	0.666818	0.927937
FBgn0023216	Parg	9.27911	-0.014506	0.0729476	0.842376	0.970325
FBgn0023388	Dap160	10.4404	0.0404918	0.0839061	0.629391	0.917173
FBgn0023395	Chd3	8.16616	-0.0964387	0.1058	0.362023	0.799189
FBgn0023407	B4	11.298	-0.0405922	0.102747	0.692791	0.933699
FBgn0023415	Acp32CD	1.15274	1.08442	0.941074	0.249188	0.722994
FBgn0023416	Ac3	8.57654	-1.93907	0.236408	2.36009e-16	7.18856e-14
FBgn0023441	fus	11.7373	0.0878756	0.106314	0.408484	0.824992
FBgn0023458	Rbcn-3A	11.6953	0.0274457	0.177398	0.877048	0.97859
FBgn0023477	Taldo	11.8363	-0.00428809	0.0652017	0.947564	0.991309
FBgn0023479	teq	8.03364	-0.436549	0.306657	0.15457	0.612931
FBgn0023489	Pph13	0.682944	-0.0661542	1.50959	0.965046	0.995171
FBgn0023496	Lip1	4.06613	0.640351	0.451972	0.156544	0.615445
FBgn0023506	Es2	8.074	-0.129416	0.0902236	0.15146	0.608168
FBgn0023507	D2hgdh	7.84232	-0.318752	0.285424	0.264094	0.736839
FBgn0023508	Ocrl	9.95452	0.0478783	0.0723716	0.508252	0.87996
FBgn0023509	mip130	10.8013	-0.0152908	0.0571271	0.788959	0.961944
FBgn0023510	Rbcn-3B	9.82499	0.0843462	0.127394	0.507913	0.87996
FBgn0023511	Edem1	10.3532	-0.0332599	0.0812623	0.682326	0.931331
FBgn0023512	eIF2Bepsilon	10.2286	-0.0724963	0.0500217	0.147255	0.601918
FBgn0023513	CG14803	9.75179	-0.125136	0.109336	0.252412	0.725919
FBgn0023514	CG14805	9.86921	0.108726	0.073814	0.140758	0.593766
FBgn0023515	CG14814	10.1653	-0.00647671	0.111887	0.953839	0.993159
FBgn0023516	Pex5	9.02484	-0.085462	0.0761284	0.261606	0.734796
FBgn0023517	Pgam5	10.3888	0.0621266	0.0918325	0.49871	0.874226
FBgn0023518	trr	10.9857	0.034541	0.133981	0.796557	0.962594
FBgn0023519	mRpL16	9.52439	0.0710737	0.0863608	0.410516	0.825727
FBgn0023520	CG3857	8.92312	0.0196755	0.0717251	0.78384	0.960986
FBgn0023521	CG3587	8.57559	0.137598	0.133575	0.302957	0.765037
FBgn0023522	CG11596	10.1106	0.0131647	0.0608546	0.82873	0.968983
FBgn0023523	Or2a	3.94172	0.254563	0.373404	0.495405	0.872817
FBgn0023524	CG3078	0.128358	0.608003	1.40727	0.665709	NA
FBgn0023525	CG3191	4.42014	-0.202903	0.322079	0.528709	0.888929
FBgn0023526	CG2865	10.0209	0.41756	0.0897143	3.25036e-06	0.000206508
FBgn0023527	CG3071	9.60201	-0.151709	0.0707303	0.0319618	0.284129
FBgn0023528	CG2924	11.4056	0.0593787	0.0543859	0.274919	0.74591
FBgn0023529	CG2918	12.6996	0.0908621	0.139469	0.514732	0.883668
FBgn0023530	CG3740	8.01386	0.040375	0.122111	0.740915	0.950309
FBgn0023531	CG32809	9.1125	-0.0751877	0.144929	0.603907	0.912041
FBgn0023534	CG17778	3.15165	0.999452	0.504097	0.0474058	0.354507
FBgn0023535	arg	5.33271	-0.663138	0.336704	0.0488963	0.361177
FBgn0023536	CG3156	8.08517	0.00969199	0.0960104	0.919592	0.986624
FBgn0023537	CG17896	11.6036	-0.0507772	0.0561795	0.366081	0.801376
FBgn0023540	CG3630	9.96413	-0.200064	0.0929348	0.0313393	0.281478
FBgn0023541	Cyp4d14	5.79878	-1.17884	0.247663	1.93719e-06	0.000133297
FBgn0023542	Nmd3	10.0507	-0.012666	0.0688038	0.853944	0.97364
FBgn0023545	PIG-K	9.71733	0.0190895	0.103959	0.854308	0.97364
FBgn0023549	Mct1	7.28339	0.174371	0.412012	0.672136	0.929272
FBgn0023550	FarO	-0.811957	0.588249	2.01774	0.770639	NA
FBgn0024150	Ac78C	5.09281	-0.505995	0.318479	0.112108	0.537996
FBgn0024179	wit	10.5958	0.0522062	0.0676195	0.440079	0.844444
FBgn0024183	vig	12.3536	0.0395234	0.0636248	0.534472	0.890387
FBgn0024184	unc-4	1.97257	1.67456	1.20642	0.165126	0.629774
FBgn0024187	syd	10.0122	0.0817792	0.0996437	0.411808	0.825727
FBgn0024188	san	10.2558	0.114765	0.0964818	0.234245	0.708067
FBgn0024189	sns	9.30518	0.0314941	0.136489	0.817513	0.96599
FBgn0024191	sip1	9.15185	0.0112928	0.0792045	0.886623	0.979933
FBgn0024194	rasp	9.53911	-0.223232	0.0587553	0.000145078	0.00560732
FBgn0024196	robl	9.87584	-0.175023	0.0930641	0.0600159	0.398307
FBgn0024222	IKKbeta	9.05075	-0.0295686	0.0790402	0.708333	0.937706
FBgn0024227	aurB	10.3867	-0.093145	0.108726	0.391613	0.815935
FBgn0024230	Hs2st	8.79342	-0.0278146	0.0916989	0.761642	0.95632
FBgn0024232	gprs	3.05914	0.33901	0.542294	0.531879	0.889556
FBgn0024234	gbb	11.9246	0.0410923	0.0477938	0.389908	0.815935
FBgn0024236	foi	10.8614	0.00386663	0.0512783	0.939893	0.989696
FBgn0024238	Fim	11.4293	0.0931549	0.107835	0.387663	0.814825
FBgn0024244	drm	11.1257	-0.0961255	0.0832095	0.247999	0.722141
FBgn0024245	dnt	10.3574	0.0269343	0.0910337	0.767328	0.957425
FBgn0024248	chico	10.0623	0.117051	0.0666017	0.078836	0.456026
FBgn0024249	cato	2.89268	-0.133747	0.497953	0.788242	0.961743
FBgn0024250	brk	10.9958	0.114866	0.0968618	0.235672	0.710308
FBgn0024251	bbx	1.46247	0.343605	1.14151	0.763408	0.956662
FBgn0024273	WASp	9.54453	0.10642	0.0811008	0.189457	0.663834
FBgn0024277	trio	12.2489	0.102654	0.115299	0.373289	0.804533
FBgn0024285	Srp54	11.893	0.0443227	0.0580458	0.445117	0.845494
FBgn0024288	Sox100B	6.59141	0.327477	0.197644	0.0975387	0.50102
FBgn0024289	Sodh-1	2.36702	-2.37722	1.30377	0.068251	0.422768
FBgn0024291	Sirt1	11.0636	-0.0377563	0.0696146	0.587569	0.904948
FBgn0024293	Spn43Ab	1.51428	-3.23253	1.52152	0.0336252	0.294355
FBgn0024294	Spn43Aa	12.5883	0.0204209	0.364864	0.955367	0.993701
FBgn0024314	Plap	11.3983	0.0621532	0.0626218	0.320945	0.779482
FBgn0024315	Picot	4.15235	-0.30876	0.524698	0.556229	0.895431
FBgn0024320	Npc1a	11.3245	0.179533	0.0810869	0.0268231	0.255547
FBgn0024321	NK7.1	8.61649	0.296641	0.105277	0.00483653	0.0854728
FBgn0024326	Mkk4	11.0153	0.07312	0.0626749	0.243349	0.718419
FBgn0024329	Mekk1	11.4837	0.109438	0.0987582	0.2678	0.739359
FBgn0024330	MED6	9.79947	-0.000850113	0.0657444	0.989683	0.999747
FBgn0024352	Stip1	12.5523	0.0213164	0.0795794	0.788804	0.961944
FBgn0024360	MTPAP	9.0646	-0.0915116	0.0687622	0.183241	0.65391
FBgn0024361	Tsp2A	3.36391	-0.781444	0.569001	0.16964	0.634098
FBgn0024362	Naa30A	10.6505	0.0386829	0.0532604	0.467656	0.855718
FBgn0024364	CG11417	10.1554	-0.00730691	0.0703393	0.917264	0.986624
FBgn0024365	CG12773	10.772	0.0502887	0.0697677	0.471031	0.857313
FBgn0024366	CG11409	8.37656	0.18684	0.117241	0.111016	0.536731
FBgn0024371	E2f2	9.96941	0.0727838	0.0703786	0.301054	0.764087
FBgn0024432	Dlc90F	11.2995	0.0472833	0.0640831	0.460609	0.853534
FBgn0024491	Bin1	10.1826	-0.0126784	0.0818015	0.87683	0.97859
FBgn0024509	Sec13	11.475	0.025709	0.0788822	0.744488	0.952048
FBgn0024510	dlt	8.17605	0.174473	0.12307	0.156288	0.615445
FBgn0024542	Neos	9.06946	0.10811	0.074805	0.148396	0.603907
FBgn0024555	flfl	12.3787	-0.00600477	0.0763015	0.937273	0.989696
FBgn0024556	mEFTu1	11.3035	-0.120158	0.0714461	0.092608	0.48956
FBgn0024558	Dph5	10.7078	-0.19621	0.0802547	0.0144914	0.176973
FBgn0024689	fws	9.93259	-0.0675041	0.078195	0.387984	0.814969
FBgn0024698	Cpsf160	10.5165	0.118608	0.081072	0.143469	0.596807
FBgn0024728	Slip1	11.5081	0.0247498	0.0548762	0.651981	0.923177
FBgn0024732	Drep1	8.5372	0.118359	0.112752	0.293843	0.757917
FBgn0024733	RpL10	15.4374	-0.0498891	0.0656221	0.447107	0.846252
FBgn0024734	PRL-1	8.95251	0.18434	0.215519	0.392367	0.815935
FBgn0024740	Lip2	-0.813221	-3.39489	2.90404	0.242393	NA
FBgn0024754	Flo1	10.8401	-0.209811	0.0942816	0.0260564	0.252097
FBgn0024804	Dbp80	11.4262	-0.189479	0.0534766	0.000395275	0.0125953
FBgn0024806	DIP2	11.3514	0.0337568	0.0908768	0.710297	0.937706
FBgn0024807	DIP1	12.612	0.320828	0.0555849	7.84028e-09	8.54673e-07
FBgn0024811	Crk	11.6882	-0.0296805	0.0711307	0.676484	0.93096
FBgn0024814	Clc	12.0825	0.110315	0.0797334	0.166498	0.631131
FBgn0024833	AP-1mu	10.849	0.0743238	0.0548128	0.175113	0.642562
FBgn0024836	stan	11.8399	0.0158769	0.167428	0.924451	0.987859
FBgn0024841	Pcd	9.99382	-0.317818	0.104473	0.00234934	0.050268
FBgn0024846	p38b	9.97342	-0.0134334	0.0618894	0.828166	0.968983
FBgn0024887	kin17	9.50755	0.118971	0.0800555	0.137251	0.586943
FBgn0024889	Kap-alpha1	10.4094	0.0864304	0.0495476	0.0810908	0.4599
FBgn0024897	b6	2.79954	0.908915	0.751173	0.226281	0.698973
FBgn0024909	Taf7	8.8591	0.052185	0.0699347	0.455549	0.850337
FBgn0024912	agt	8.83827	-0.0253937	0.0963889	0.792203	0.96252
FBgn0024913	Actbeta	-1.15239	-0.780576	2.40977	0.745997	NA
FBgn0024920	Ts	10.0692	-0.0317194	0.138826	0.81927	0.966471
FBgn0024921	Tnpo	11.6359	0.0201317	0.100096	0.840602	0.970325
FBgn0024941	RSG7	2.47635	-0.158307	0.862585	0.854385	0.97364
FBgn0024943	PIP82	-1.13306	0.712893	3.60652	0.843305	NA
FBgn0024944	Oamb	-0.387181	-2.02055	2.02068	0.317343	NA
FBgn0024945	NitFhit	9.20635	-0.0639738	0.0722094	0.375645	0.80659
FBgn0024947	NTPase	10.2678	0.0321385	0.0724083	0.65715	0.925022
FBgn0024956	Mat1	10.0015	-0.0547017	0.0659863	0.407112	0.824502
FBgn0024957	Irp-1B	11.2795	0.0865263	0.0707507	0.221339	0.692906
FBgn0024958	Irp-1A	10.6158	-0.137656	0.044527	0.00199128	0.0448297
FBgn0024963	GluClalpha	0.661291	-2.05877	1.78241	0.248069	0.722141
FBgn0024973	CG2701	9.98013	0.0505902	0.063387	0.424803	0.834933
FBgn0024975	CG2712	7.91507	0.00800481	0.0913802	0.930195	0.989014
FBgn0024980	Syx4	3.04515	0.449738	0.614213	0.464035	0.855329
FBgn0024983	CG4293	9.97221	0.000998786	0.0932538	0.991454	0.999747
FBgn0024984	CG3457	3.61125	0.42471	0.54227	0.433505	0.838115
FBgn0024985	Rilpl	10.6191	0.0677638	0.0634403	0.285452	0.752391
FBgn0024986	CG3719	8.96215	-0.0401162	0.102674	0.696008	0.935153
FBgn0024987	ssx	11.4504	0.109897	0.0585338	0.0604509	0.399508
FBgn0024989	CG3777	11.1716	0.175294	0.11427	0.12502	0.563651
FBgn0024991	CG2694	10.0108	-0.0180739	0.10371	0.86165	0.974819
FBgn0024992	Spg7	9.54087	-0.00239379	0.0603691	0.96837	0.996269
FBgn0024993	CG2662	8.06059	0.0138294	0.101422	0.89154	0.982423
FBgn0024994	Ugalt	9.84225	0.0284619	0.0798868	0.721633	0.942747
FBgn0024995	CG2680	-0.327762	-0.0128803	1.87617	0.994522	NA
FBgn0024996	eIF2Bbeta	9.99861	-0.0239316	0.0646527	0.711266	0.937706
FBgn0024997	CG2681	-0.0941485	-0.339385	1.6948	0.841285	NA
FBgn0024998	CG2685	9.48847	-0.025056	0.0619532	0.685893	0.931555
FBgn0025109	Bem46	8.48125	-0.0511435	0.0868365	0.555886	0.895018
FBgn0025111	Ant2	6.90917	0.123095	0.187775	0.512116	0.882147
FBgn0025118	tRNA:Pro-CGG-3-1	1.43228	-2.59301	1.39646	0.0633341	0.409418
FBgn0025185	az2	8.73083	-0.135783	0.108289	0.209878	0.684135
FBgn0025186	ari-2	10.0163	0.0583424	0.0831874	0.483092	0.865241
FBgn0025335	Cpes	9.03399	0.101918	0.0993501	0.304962	0.767119
FBgn0025336	CG4882	9.41738	0.0180173	0.0825829	0.827295	0.968896
FBgn0025352	Mtpbeta	11.9125	0.0494151	0.0631689	0.434056	0.838479
FBgn0025360	Optix	8.60649	0.110015	0.0837312	0.188877	0.663163
FBgn0025366	Ip259	12.4032	0.172928	0.0983844	0.0788024	0.456026
FBgn0025373	Fpps	10.7578	-0.0559353	0.0726164	0.441131	0.844897
FBgn0025381	rush	10.2362	-0.0677608	0.0671082	0.312627	0.773797
FBgn0025382	Rab27	8.57515	-0.368398	0.188419	0.0505589	0.366429
FBgn0025383	CG14780	0.225597	-0.438296	1.24914	0.72568	NA
FBgn0025387	CG12184	3.51882	1.55715	0.502134	0.00192822	0.0442764
FBgn0025388	CG12179	9.8715	-0.0487109	0.11246	0.664914	0.927542
FBgn0025390	Mur2B	5.12689	0.0782761	0.338729	0.817246	0.96599
FBgn0025391	Scgdelta	0.0888064	2.87058	2.00188	0.151589	NA
FBgn0025393	CG14795	1.0401	-2.32296	1.34831	0.0849116	0.469986
FBgn0025394	inc	11.5877	0.0693039	0.0546914	0.20509	0.678351
FBgn0025454	Cyp6g1	9.28857	-3.54919	1.17012	0.00241983	0.0511713
FBgn0025455	CycT	11.5263	0.0984125	0.0868066	0.256921	0.729151
FBgn0025456	CREG	8.14801	-0.093026	0.2277	0.682872	0.931331
FBgn0025457	Bub3	11.6996	0.0696867	0.0674949	0.30185	0.764861
FBgn0025463	Bap60	12.4199	-0.0355972	0.0416603	0.392849	0.816281
FBgn0025469	slv	8.87659	-0.0889369	0.0725891	0.220496	0.69184
FBgn0025519	fidipidine	9.89127	-0.104148	0.0562885	0.0642764	0.412165
FBgn0025525	bab2	10.0568	0.0776513	0.117186	0.507565	0.87996
FBgn0025549	unc-119	10.3314	0.0447642	0.0549654	0.415411	0.828584
FBgn0025558	CG4101	8.5096	-0.0155403	0.111099	0.888756	0.980814
FBgn0025571	SF1	12.1915	0.0562238	0.041661	0.177159	0.64451
FBgn0025574	Pli	10.9547	0.165765	0.0751403	0.027379	0.258938
FBgn0025578	Lcp9	5.19009	1.4488	0.760201	0.0566738	0.388582
FBgn0025582	eIF3e	12.839	-0.043059	0.058532	0.461944	0.854724
FBgn0025592	Gk1	9.34348	0.0263744	0.0834653	0.752008	0.953919
FBgn0025595	AkhR	2.49949	-3.07303	1.49655	0.0400327	0.322378
FBgn0025608	Faf2	10.2883	0.0828975	0.0567647	0.144188	0.596807
FBgn0025615	Torsin	11.0291	-0.0203856	0.0458098	0.656316	0.924987
FBgn0025616	CG13359	-0.23446	-1.4841	1.98383	0.454401	NA
FBgn0025620	CG13360	4.95346	-1.6258	0.874002	0.0628605	0.407374
FBgn0025621	CG16989	10.1866	-0.156765	0.0707463	0.0266996	0.255547
FBgn0025624	CG4025	8.71202	-0.0210984	0.0868032	0.807959	0.965412
FBgn0025625	Sik2	5.17122	-0.763342	0.388601	0.0494916	0.3635
FBgn0025626	CG4281	10.6904	-0.00293271	0.0454756	0.94858	0.991379
FBgn0025627	CG4194	5.65847	0.19851	0.248552	0.424484	0.834933
FBgn0025628	CG4199	11.5383	-0.167814	0.09546	0.0787554	0.456026
FBgn0025629	CG4045	9.57381	-0.141822	0.0985257	0.150027	0.606727
FBgn0025630	Rtca	10.4446	0.172474	0.075592	0.0225107	0.233354
FBgn0025631	moody	6.84351	0.318623	0.194685	0.101713	0.513822
FBgn0025632	CG4313	7.5994	-0.0200528	0.143241	0.888665	0.980814
FBgn0025633	CG13366	11.6503	0.00613133	0.0887928	0.944948	0.990699
FBgn0025634	CG13367	9.47472	0.0628053	0.0818598	0.442944	0.845482
FBgn0025635	CG17829	9.20346	-0.00437641	0.0789132	0.955773	0.993874
FBgn0025637	SkpA	12.297	-0.0205783	0.0618811	0.739477	0.949773
FBgn0025638	Roc1a	11.8572	0.0796512	0.0742509	0.283392	0.750502
FBgn0025639	Hmt4-20	12.2197	0.0534715	0.110234	0.627624	0.917173
FBgn0025640	CG13369	8.88254	-0.27374	0.119133	0.0215754	0.228461
FBgn0025641	DAAM	10.4984	0.280733	0.201295	0.163127	0.626837
FBgn0025642	CG32812	1.92976	0.371872	0.885864	0.674642	0.929968
FBgn0025643	CG3588	4.88829	-2.41391	0.575939	2.77415e-05	0.00133005
FBgn0025644	CG14424	-0.133821	-2.32169	1.61526	0.15062	NA
FBgn0025674	CycK	11.0788	-0.154758	0.0470227	0.000997851	0.0267763
FBgn0025676	CkIIalpha-i3	8.76765	-0.33488	0.124379	0.00709381	0.112847
FBgn0025678	CaBP1	12.5634	-0.112385	0.0981614	0.252252	0.725919
FBgn0025680	cry	-0.157515	1.44864	2.57025	0.573014	NA
FBgn0025681	CG3558	10.635	0.10187	0.0888063	0.251339	0.725629
FBgn0025682	scf	10.6315	0.166512	0.0958167	0.0822431	0.462132
FBgn0025683	CG3164	11.8426	0.059647	0.0524952	0.255857	0.728529
FBgn0025684	MFS18	8.76969	0.0510514	0.107695	0.635473	0.918563
FBgn0025686	Amnionless	1.54919	0.914645	1.28381	0.476188	0.861376
FBgn0025692	Lfg	3.71729	-0.339633	0.42876	0.428286	0.83618
FBgn0025693	ZnT41F	8.76037	0.344703	0.174656	0.0484254	0.360035
FBgn0025697	santa-maria	4.28691	0.690298	2.26163	0.760198	0.956117
FBgn0025700	CG5885	12.0653	0.124075	0.147099	0.398962	0.81983
FBgn0025702	Srpk79D	4.59815	-0.462474	0.343468	0.178147	0.64629
FBgn0025709	CNT2	5.00371	-0.541732	0.375287	0.148876	0.604611
FBgn0025712	CG13920	5.16563	0.062322	0.244617	0.798898	0.962805
FBgn0025716	Bap55	11.1941	0.00696695	0.0556734	0.900413	0.983717
FBgn0025720	Ate1	10.1557	-0.0517174	0.057227	0.366142	0.801376
FBgn0025724	beta'COP	12.0884	0.111543	0.0852925	0.19095	0.664474
FBgn0025725	alphaCOP	12.2017	0.0947843	0.105777	0.37021	0.80291
FBgn0025726	unc-13	12.1359	0.17851	0.128197	0.163782	0.627497
FBgn0025739	pon	10.8128	-0.0468508	0.0884234	0.596219	0.908333
FBgn0025740	PlexB	11.1915	0.0434757	0.14652	0.766679	0.957401
FBgn0025741	PlexA	13.0813	-0.0159911	0.0947307	0.865949	0.975248
FBgn0025742	mtm	10.3441	0.0184644	0.0547453	0.735907	0.947728
FBgn0025743	mbt	11.116	0.0410461	0.0507966	0.419063	0.830721
FBgn0025777	homer	10.573	0.0907566	0.0687575	0.186851	0.660117
FBgn0025781	Cdc16	9.88002	-0.07722	0.0823519	0.348408	0.79281
FBgn0025790	TBPH	11.1783	0.0581244	0.0459673	0.20606	0.679877
FBgn0025800	Smox	11.8358	-0.122511	0.0692656	0.0769414	0.451621
FBgn0025802	Sbf	9.7976	0.160295	0.120858	0.184738	0.655975
FBgn0025807	Rad9	8.33775	-0.0944073	0.119173	0.428251	0.83618
FBgn0025808	Rad17	8.19881	0.0463985	0.09802	0.635958	0.918748
FBgn0025809	Paf-AHalpha	10.4548	-0.0240874	0.0627981	0.701298	0.936722
FBgn0025814	Mgstl	11.1595	0.932984	0.131791	1.44888e-12	2.83106e-10
FBgn0025815	Mcm6	11.6156	-0.0645219	0.100559	0.521111	0.885893
FBgn0025820	JTBR	8.49676	0.109439	0.0907885	0.228039	0.701372
FBgn0025830	IntS8	9.57085	0.0911967	0.0665417	0.170524	0.635234
FBgn0025832	Fen1	9.70879	-0.0405839	0.0886656	0.647154	0.921533
FBgn0025835	CG17707	3.57009	-0.0438277	0.458458	0.92384	0.987859
FBgn0025836	RhoGAP1A	12.1355	0.0894066	0.100588	0.374087	0.805109
FBgn0025839	ND-B14.5A	9.21485	0.00823976	0.0956221	0.931331	0.989014
FBgn0025864	Crag	11.76	0.0519757	0.108825	0.63293	0.917173
FBgn0025865	Cortactin	11.6972	0.155112	0.0668637	0.0203508	0.220222
FBgn0025866	CalpB	9.96158	-0.0585473	0.0640886	0.36096	0.798147
FBgn0025874	Meics	8.97861	-0.025372	0.0881282	0.773424	0.958489
FBgn0025878	wrapper	4.48257	1.44799	0.391441	0.000216342	0.00762053
FBgn0025879	Timp	7.86951	0.0763373	0.160985	0.635364	0.918563
[truncated: 9,622 more rows]

## Sheet: F. DESEQ2_Exp.1_PW_Mix_NA_vs_C
Extended Data Table 1F| Differential expression analysis (DESeq2) in Mix non-assimilated vs control from selection experiment 1 in pupal wing.
[truncated: 12,325 more rows]

[truncated: 4 more sheets: G. DESEQ2_Exp.2_WD_Mix_A_vs_C, H. DESEQ2_Exp.2_PW_Mix_A_vs_C, I. DESEQ2_Exp.2_WD_Mix_NA_vs_C, J. DESEQ2_Exp.2_PW_Mix_NA_vs_C]
